# Supplementary material for: Radiocarbon analysis reveals underestimation of soil organic carbon persistence in new-generation soil models
Source: Copernicus journal article supplement (doi:10.5194/gmd-2023-242), 2024-01-19
Supplement: Supplementary file 1 [file check_14C_implementation_MIMICS2021.xlsx]

## Sheet: Delta14C
year	LIT_m	LIT_s	MIC_r	MIC_K	SOM_p	SOM_c	SOM_a
1950	-10.5165	-10.2488	-8.27748	-10.2193	-24.2096	-14.0729	-13.0613
1951	-10.5165	-10.2488	-8.27748	-10.2193	-24.2096	-14.0729	-13.0613
1952	-10.5165	-10.2488	-8.27748	-10.2193	-24.2096	-14.0729	-13.0613
1953	-11.1606	-10.5044	-8.43428	-10.316	-24.3189	-14.0849	-13.0816
1954	-8.72833	-9.67612	-7.86979	-10.0401	-24.0335	-14.0609	-13.0382
1955	-8.99482	-9.34518	-7.84676	-9.80101	-23.7056	-14.0103	-12.9569
1956	-7.11953	-8.39756	-7.35469	-9.37763	-23.1239	-13.9169	-12.8129
1957	8.73802	-1.56493	-3.37885	-6.63034	-19.8264	-13.4957	-12.1294
1958	33.1066	11.882	3.29402	-0.497564	-11.9771	-12.3687	-10.3311
1959	54.315	27.8291	9.93652	7.72218	-0.288309	-10.3759	-7.28217
1960	104.052	56.9131	23.8918	21.6171	19.6111	-6.89479	-2.03139
1961	162.805	96.9438	41.5328	41.8891	50.0048	-1.21714	6.37977
1962	152.347	114.51	44.0943	55.7867	77.4592	5.57848	15.5642
1963	144.739	121.559	45.9468	63.4464	99.0504	12.5073	23.9949
1964	222.955	158.024	67.6558	80.9978	131.826	21.0518	34.6851
1965	480.018	286.319	133.845	137.26	215.194	36.9081	57.5328
1966	488.527	354.659	149.548	182.853	304.618	58.3754	86.008
1967	438.325	367.64	149.462	202.63	372.286	80.4155	111.119
1968	386.39	352.523	146.122	206.314	417.282	100.301	130.971
1969	347.998	329.182	143.53	203.228	445.585	117.243	146.155
1970	310.55	301.971	139.512	196.627	460.74	131.111	157.289
1971	299.931	284.018	140.173	191.814	470.264	142.607	165.87
1972	274.716	264.269	137.051	186.221	473.662	151.969	172.188
1973	258.007	247.347	134.886	180.68	472.676	159.429	176.613
1974	249.745	235.282	134.13	176.512	470.124	165.457	179.835
1975	220.449	216.795	128.286	169.913	462.458	169.865	181.405
1976	204.947	201.031	124.638	163.149	451.896	172.793	181.579
1977	186.643	185.296	120.03	156.144	439.068	174.431	180.599
1978	165.14	168.265	114.217	148.214	423.457	174.799	178.434
1979	155.754	155.607	110.689	141.344	407.608	174.213	175.551
1980	150.929	146.95	108.184	136.082	393.084	173.04	172.425
1981	133.432	135.088	102.789	129.862	377.406	171.201	168.804
1982	117.868	122.504	97.4105	122.854	360.329	168.647	164.561
1983	112.772	113.806	94.2197	116.992	344.142	165.64	160.081
1984	104.222	105.596	90.3492	111.576	328.6	162.307	155.486
1985	97.9786	98.65	86.9321	106.601	313.789	158.729	150.846
1986	90.5164	91.8452	83.2588	101.76	299.454	154.951	146.168
1987	84.3325	85.6575	79.8446	97.1288	285.656	151.02	141.48
1988	79.2353	80.2272	76.7002	92.8208	272.558	146.995	136.835
1989	75.4113	75.7127	73.894	88.9304	260.325	142.941	132.298
1990	70.1494	71.0892	70.8211	85.1142	248.602	138.865	127.842
1991	66.2259	66.9759	68.0614	81.4936	237.46	134.79	123.48
1992	60.1788	62.2508	64.8588	77.7201	226.476	130.696	119.15
1993	55.0057	57.5768	61.8199	73.9054	215.657	126.575	114.832
1994	52.5548	54.0224	59.4335	70.5146	205.52	122.489	110.616
1995	48.5152	50.3941	56.7731	67.2411	195.814	118.447	106.5
1996	45.4012	47.1285	54.3386	64.1213	186.548	114.459	102.487
1997	43.3723	44.4899	52.2165	61.3059	177.9	110.558	98.6161
1998	39.5667	41.4605	49.755	58.4549	169.509	106.724	94.8448
1999	37.8817	39.1045	47.792	55.8452	161.621	102.98	91.2002
2000	36.8239	37.3433	46.0712	53.5738	154.392	99.3581	87.7279
2001	35.4451	35.7772	44.362	51.496	147.699	95.8662	84.4271
2002	32.3209	33.6207	42.2996	49.2746	141.127	92.467	81.2267
2003	29.092	31.1199	40.2032	46.895	134.546	89.1287	78.0747
2004	26.4937	28.6791	38.2606	44.52	128.071	85.8479	74.9704
2005	23.9014	26.2612	36.3469	42.1778	121.727	82.6238	71.9171
2006	22.6149	24.3826	34.7629	40.0579	115.733	79.4781	68.954
2007	19.6399	22.104	32.8441	37.8769	109.809	76.3932	66.0495
2008	18.7796	20.4826	31.4124	35.9175	104.234	73.3886	63.2379
2009	16.5027	18.6243	29.7277	33.9745	98.8223	70.458	60.5052
2010	15.1748	17.0405	28.2687	32.1342	93.6446	67.6036	57.855
2011	14.3955	15.8166	26.9937	30.4894	88.8193	64.8423	55.3134
2012	18.4636	16.7425	26.9393	29.732	85.186	62.2749	53.0431
2013	19.3827	17.5451	26.3732	29.262	82.2771	59.9114	51.0377
2014	20.1292	18.274	25.8095	28.8387	79.7812	57.7256	49.2371
2015	20.8004	18.9367	25.2982	28.4586	77.6209	55.7038	47.6098
2016	21.4086	19.5393	24.8336	28.1148	75.7395	53.8334	46.1325
