# Supplementary material for: Radiocarbon analysis reveals underestimation of soil organic carbon persistence in new-generation soil models
Source: Copernicus journal article supplement (doi:10.5194/gmd-2023-242), 2024-01-19
Supplement: Supplementary file 2 [file check_14C_implementation_SOMic_Baisden_2002_Riverbank_Riverbank.1997.xlsx]

## Sheet: using Fraction Modern (good)
time	bulk_14c	LF_14c	HF_14c
1950-01-01	-25.5179	-21.712	-26.1142
1950-02-01	-25.5292	-21.7204	-26.1225
1950-03-01	-25.5411	-21.7286	-26.1301
1950-04-01	-25.5536	-21.7376	-26.1373
1950-05-01	-25.5561	-21.8583	-26.1434
1950-06-01	-25.5428	-22.0857	-26.1486
1950-07-01	-25.5454	-22.1349	-26.1523
1950-08-01	-25.5598	-22.1455	-26.1536
1950-09-01	-25.5776	-22.149	-26.1549
1950-10-01	-25.5939	-22.1621	-26.1576
1950-11-01	-25.6074	-22.1755	-26.1631
1950-12-01	-25.619	-22.1841	-26.1709
1951-01-01	-25.63	-22.1924	-26.1795
1951-02-01	-25.6403	-22.2016	-26.1887
1951-03-01	-25.6517	-22.2099	-26.1969
1951-04-01	-25.6642	-22.2184	-26.204
1951-05-01	-25.6707	-22.3232	-26.2098
1951-06-01	-25.6665	-22.5255	-26.2149
1951-07-01	-25.6733	-22.568	-26.219
1951-08-01	-25.6875	-22.5732	-26.2215
1951-09-01	-25.7044	-22.5754	-26.2239
1951-10-01	-25.7207	-22.5816	-26.2273
1951-11-01	-25.7341	-22.5904	-26.2334
1951-12-01	-25.7456	-22.5989	-26.2414
1952-01-01	-25.7567	-22.608	-26.2498
1952-02-01	-25.7677	-22.6173	-26.2584
1952-03-01	-25.779	-22.6266	-26.2667
1952-04-01	-25.7916	-22.6363	-26.2738
1952-05-01	-25.7958	-22.7402	-26.2808
1952-06-01	-25.7902	-22.9238	-26.2865
1952-07-01	-25.7927	-22.9899	-26.2915
1952-08-01	-25.8035	-23.0061	-26.2949
1952-09-01	-25.8197	-23	-26.2978
1952-10-01	-25.8354	-23.0053	-26.3017
1952-11-01	-25.8492	-23.0145	-26.3073
1952-12-01	-25.8611	-23.0231	-26.315
1953-01-01	-25.8719	-23.0323	-26.3237
1953-02-01	-25.8829	-23.0415	-26.3323
1953-03-01	-25.8939	-23.0508	-26.3408
1953-04-01	-25.9059	-23.0605	-26.3485
1953-05-01	-25.9103	-23.1492	-26.3555
1953-06-01	-25.9028	-23.3214	-26.3612
1953-07-01	-25.9035	-23.3841	-26.3663
1953-08-01	-25.9138	-23.3758	-26.3697
1953-09-01	-25.9298	-23.3725	-26.3725
1953-10-01	-25.9454	-23.3784	-26.3764
1953-11-01	-25.9593	-23.3866	-26.382
1953-12-01	-25.9708	-23.3959	-26.3901
1954-01-01	-25.9814	-23.4055	-26.3991
1954-02-01	-25.9919	-23.4152	-26.4081
1954-03-01	-26.0034	-23.4247	-26.4162
1954-04-01	-26.0146	-23.4345	-26.4245
1954-05-01	-26.0176	-23.4712	-26.4321
1954-06-01	-25.9955	-23.5663	-26.4386
1954-07-01	-25.9889	-23.5977	-26.4441
1954-08-01	-25.9902	-23.5642	-26.4469
1954-09-01	-26.0053	-23.5669	-26.4491
1954-10-01	-26.021	-23.5746	-26.4523
1954-11-01	-26.0337	-23.5833	-26.4584
1954-12-01	-26.0454	-23.5935	-26.4662
1955-01-01	-26.0563	-23.6037	-26.4748
1955-02-01	-26.067	-23.6138	-26.4838
1955-03-01	-26.0781	-23.624	-26.4923
1955-04-01	-26.0897	-23.6339	-26.5003
1955-05-01	-26.0782	-23.5742	-26.5072
1955-06-01	-26.0271	-23.4369	-26.5133
1955-07-01	-26.0044	-23.4016	-26.5177
1955-08-01	-25.9826	-23.2385	-26.5182
1955-09-01	-25.9956	-23.2657	-26.5178
1955-10-01	-26.0121	-23.2744	-26.5175
1955-11-01	-26.0265	-23.284	-26.521
1955-12-01	-26.0391	-23.2973	-26.5279
1956-01-01	-26.0506	-23.3098	-26.5361
1956-02-01	-26.0617	-23.3215	-26.5446
1956-03-01	-26.0742	-23.3343	-26.5519
1956-04-01	-26.0879	-23.3447	-26.5581
1956-05-01	-26.035	-22.9681	-26.5642
1956-06-01	-25.8475	-22.0336	-26.57
1956-07-01	-25.7598	-21.8464	-26.5719
1956-08-01	-25.6821	-21.3931	-26.561
1956-09-01	-25.6693	-21.3179	-26.5486
1956-10-01	-25.669	-21.235	-26.5372
1956-11-01	-25.6728	-21.1824	-26.5327
1956-12-01	-25.688	-21.2185	-26.5351
1957-01-01	-25.7041	-21.2559	-26.5393
1957-02-01	-25.7179	-21.2795	-26.5456
1957-03-01	-25.7336	-21.3056	-26.5504
1957-04-01	-25.752	-21.3251	-26.5523
1957-05-01	-25.5443	-19.843	-26.5534
1957-06-01	-24.9493	-16.6311	-26.5524
1957-07-01	-24.6081	-15.6431	-26.5411
1957-08-01	-24.4212	-14.8943	-26.4954
1957-09-01	-24.4573	-15.1748	-26.44
1957-10-01	-24.527	-15.3085	-26.3879
1957-11-01	-24.5675	-15.3148	-26.3605
1957-12-01	-24.5914	-15.357	-26.358
1958-01-01	-24.6072	-15.3785	-26.3623
1958-02-01	-24.6243	-15.4009	-26.3655
1958-03-01	-24.6475	-15.429	-26.3639
1958-04-01	-24.6708	-15.4445	-26.3613
1958-05-01	-24.1938	-12.1584	-26.3485
1958-06-01	-22.9433	-5.73776	-26.34
1958-07-01	-22.0972	-3.22931	-26.3085
1958-08-01	-21.5246	-1.00544	-26.1978
1958-09-01	-21.5814	-1.69522	-26.0547
1958-10-01	-21.6874	-1.86714	-25.9337
1958-11-01	-21.7668	-1.83591	-25.8461
1958-12-01	-21.8211	-1.93357	-25.8145
1959-01-01	-21.8504	-1.98297	-25.8071
1959-02-01	-21.8843	-2.03278	-25.7962
1959-03-01	-21.9165	-2.07272	-25.787
1959-04-01	-21.9542	-2.09753	-25.7717
1959-05-01	-21.4731	1.10895	-25.7493
1959-06-01	-19.0051	13.9743	-25.7061
1959-07-01	-17.5397	17.7225	-25.6377
1959-08-01	-16.7613	20.3921	-25.4245
1959-09-01	-16.854	19.6578	-25.162
1959-10-01	-16.9827	19.8952	-24.9233
1959-11-01	-17.0647	20.04	-24.784
1959-12-01	-17.1385	19.8409	-24.7392
1960-01-01	-17.1758	19.762	-24.7242
1960-02-01	-17.204	19.7096	-24.7169
1960-03-01	-17.2797	19.583	-24.6717
1960-04-01	-17.3729	19.5093	-24.609
1960-05-01	-16.3354	25.9273	-24.5483
1960-06-01	-12.9361	42.2075	-24.4675
1960-07-01	-11.4482	44.7768	-24.3248
1960-08-01	-11.1493	45.1353	-23.9701
1960-09-01	-11.4896	44.2094	-23.5996
1960-10-01	-11.8186	43.97	-23.299
1960-11-01	-11.9971	43.842	-23.1487
1960-12-01	-12.0871	43.7402	-23.0883
1961-01-01	-12.1277	43.7004	-23.0695
1961-02-01	-12.1832	43.6531	-23.0384
1961-03-01	-12.2705	43.5954	-22.9822
1961-04-01	-12.3611	43.5815	-22.919
1961-05-01	-11.4253	49.1722	-22.8268
1961-06-01	-7.45105	66.8605	-22.7267
1961-07-01	-5.7715	69.4881	-22.5689
1961-08-01	-5.23905	70.4748	-22.1675
1961-09-01	-5.53565	69.6792	-21.7298
1961-10-01	-5.75695	69.9164	-21.3865
1961-11-01	-5.91889	70.1828	-21.1364
1961-12-01	-6.01262	70.0898	-21.0489
1962-01-01	-6.07428	69.9892	-21.0112
1962-02-01	-6.14717	69.8883	-20.9646
1962-03-01	-6.25649	69.7698	-20.8893
1962-04-01	-6.38666	69.7038	-20.7931
1962-05-01	-5.30432	75.4241	-20.6761
1962-06-01	-1.84317	89.1993	-20.5332
1962-07-01	-0.0516205	92.6652	-20.315
1962-08-01	0.763945	95.3382	-19.869
1962-09-01	0.598664	95.1841	-19.3698
1962-10-01	0.481285	95.8402	-18.9848
1962-11-01	0.342248	96.2293	-18.6873
1962-12-01	0.274189	96.1357	-18.6192
1963-01-01	0.185459	95.9525	-18.5569
1963-02-01	0.126328	95.8496	-18.5209
1963-03-01	0.0322431	95.7092	-18.4555
1963-04-01	-0.215655	95.5135	-18.2665
1963-05-01	1.52754	104.854	-18.0957
1963-06-01	6.99922	126.515	-17.9119
1963-07-01	9.23668	129.601	-17.6099
1963-08-01	10.0659	133.501	-16.9579
1963-09-01	9.70921	132.878	-16.2952
1963-10-01	9.22399	132.636	-15.7383
1963-11-01	9.02226	132.731	-15.4779
1963-12-01	8.86169	132.518	-15.3408
1964-01-01	8.7306	132.329	-15.2421
1964-02-01	8.62887	132.207	-15.1687
1964-03-01	8.50703	132.088	-15.0796
1964-04-01	8.26719	132.022	-14.8874
1964-05-01	10.8443	147.486	-14.6851
1964-06-01	19.9723	189.344	-14.4508
1964-07-01	23.706	194.66	-14.0296
1964-08-01	25.0413	199.701	-13.0269
1964-09-01	24.2636	197.272	-11.9828
1964-10-01	23.4555	196.537	-11.1646
1964-11-01	22.8328	195.692	-10.6652
1964-12-01	22.5427	195.413	-10.4287
1965-01-01	22.3773	195.288	-10.2975
1965-02-01	22.224	195.191	-10.1774
1965-03-01	21.9778	195.077	-9.9837
1965-04-01	21.7193	195.121	-9.76441
1965-05-01	25.1544	215.28	-9.53182
1965-06-01	38.195	274.129	-9.20105
1965-07-01	43.5877	282.582	-8.68692
1965-08-01	45.0973	284.871	-7.35999
1965-09-01	44.0596	282.074	-5.92123
1965-10-01	42.6953	280.602	-4.67981
1965-11-01	42.0175	280.129	-4.05439
1965-12-01	41.6796	279.794	-3.7696
1966-01-01	41.5263	279.664	-3.64394
1966-02-01	41.3432	279.533	-3.49447
1966-03-01	41.0581	279.375	-3.26228
1966-04-01	40.7127	279.324	-2.97149
1966-05-01	44.2181	298.083	-2.60808
1966-06-01	57.5387	351.348	-2.17656
1966-07-01	64.8453	365.199	-1.48529
1966-08-01	67.8659	370.903	0.0628373
1966-09-01	66.4231	366.252	1.83885
1966-10-01	64.7835	364.618	3.37244
1966-11-01	63.7797	364.31	4.32046
1966-12-01	63.4652	364.085	4.59509
1967-01-01	63.2978	363.964	4.73428
1967-02-01	63.1071	363.845	4.89268
1967-03-01	62.8375	363.706	5.1163
1967-04-01	62.4264	363.589	5.45946
1967-05-01	64.3337	372.574	5.85211
1967-06-01	76.5995	414.114	6.44365
1967-07-01	85.1649	430.538	7.13303
1967-08-01	89.3589	436.062	8.62278
1967-09-01	88.3559	432.58	10.4734
1967-10-01	86.548	430.531	12.0386
1967-11-01	85.4824	430.315	13.0809
1967-12-01	84.6814	430.018	13.7791
1968-01-01	84.3045	429.851	14.0896
1968-02-01	84.0319	429.749	14.3108
1968-03-01	83.6861	429.646	14.5895
1968-04-01	83.1406	429.579	15.0277
1968-05-01	86.1633	439.58	15.61
1968-06-01	97.0417	464.542	16.2645
1968-07-01	103.865	473.256	17.2441
1968-08-01	105.384	473.55	19.0519
1968-09-01	103.608	471.817	21.0431
1968-10-01	102.319	471.917	22.6068
1968-11-01	101.363	471.552	23.474
1968-12-01	100.967	471.391	23.8129
1969-01-01	100.646	471.282	24.0882
1969-02-01	100.413	471.212	24.2841
1969-03-01	100.098	471.136	24.5482
1969-04-01	99.4472	471.055	25.0794
1969-05-01	101.907	476.387	25.6606
1969-06-01	110.454	489.389	26.443
1969-07-01	116.22	494.726	27.4261
1969-08-01	117.748	494.979	29.0411
1969-09-01	115.849	493.599	30.9933
1969-10-01	114.19	493.229	32.4654
1969-11-01	113.423	493.188	33.2094
1969-12-01	113.056	493.125	33.5357
1970-01-01	112.855	493.083	33.7062
1970-02-01	112.7	493.049	33.8341
1970-03-01	112.243	492.991	34.2137
1970-04-01	111.807	492.955	34.5784
1970-05-01	113.254	495.08	35.0671
1970-06-01	122.121	503.522	35.6268
1970-07-01	126.83	505.84	36.4728
1970-08-01	128.014	506.108	38.0418
1970-09-01	126.523	505.423	39.8165
1970-10-01	125.276	505.347	41.2087
1970-11-01	124.472	505.377	42.1546
1970-12-01	124.087	505.326	42.5203
1971-01-01	123.78	505.276	42.7788
1971-02-01	123.457	505.233	43.0461
1971-03-01	123.165	505.198	43.2857
1971-04-01	122.713	505.165	43.658
1971-05-01	123.678	505.933	44.1291
1971-06-01	130.525	509.378	44.9121
1971-07-01	133.778	510.203	45.8424
1971-08-01	134.154	509.956	47.3341
1971-09-01	132.979	509.702	48.8677
1971-10-01	131.711	509.638	50.2156
1971-11-01	131.158	509.63	50.9627
1971-12-01	130.571	509.599	51.4918
1972-01-01	130.278	509.577	51.7371
1972-02-01	130.177	509.561	51.814
1972-03-01	129.902	509.541	52.04
1972-04-01	129.294	509.52	52.5291
1972-05-01	130.448	509.607	53.0621
1972-06-01	137.489	509.995	53.7703
1972-07-01	140.308	510.048	54.6775
1972-08-01	140.581	509.321	56.1986
1972-09-01	139.397	509.108	57.7004
1972-10-01	138.381	508.977	58.9197
1972-11-01	137.749	508.885	59.7251
1972-12-01	137.274	508.898	60.1651
1973-01-01	137.062	508.9	60.3428
1973-02-01	136.827	508.9	60.5363
1973-03-01	136.357	508.908	60.9174
1973-04-01	135.911	508.903	61.2819
1973-05-01	137.045	507.993	61.7436
1973-06-01	143.396	504.906	62.3305
1973-07-01	146.57	504.095	63.1587
1973-08-01	147.696	502.697	64.5316
1973-09-01	146.308	502.72	66.0289
1973-10-01	144.724	502.907	67.3426
1973-11-01	143.861	502.9	68.1167
1973-12-01	143.38	502.918	68.5285
1974-01-01	143.207	502.917	68.6695
1974-02-01	142.993	502.917	68.8442
1974-03-01	142.587	502.923	69.1719
1974-04-01	142.127	502.911	69.5444
1974-05-01	142.823	501.434	69.8748
1974-06-01	148.483	494.211	70.495
1974-07-01	151.33	492.319	71.2602
1974-08-01	151.964	491.141	72.5011
1974-09-01	150.837	491.044	73.8791
1974-10-01	149.499	491.395	75.0076
1974-11-01	148.613	491.425	75.7732
1974-12-01	148.184	491.458	76.1403
1975-01-01	147.876	491.483	76.3929
1975-02-01	147.609	491.494	76.6083
1975-03-01	147.315	491.5	76.8428
1975-04-01	146.835	491.496	77.2204
1975-05-01	147.864	488.236	77.7337
1975-06-01	152.209	480.368	78.3175
1975-07-01	154.803	477.427	79.0262
1975-08-01	155.731	475.161	80.138
1975-09-01	154.614	475.653	81.3948
1975-10-01	153.33	475.674	82.5936
1975-11-01	152.535	475.503	83.3882
1975-12-01	152.111	475.637	83.7383
1976-01-01	151.835	475.692	83.9666
1976-02-01	151.517	475.735	84.2252
1976-03-01	151.274	475.753	84.4194
1976-04-01	150.83	475.766	84.7706
1976-05-01	151.888	471.202	85.3935
1976-06-01	156.296	461.35	86.0541
1976-07-01	159.548	456.573	86.8211
1976-08-01	160.088	454.705	87.9514
1976-09-01	158.946	455.226	89.2747
1976-10-01	157.939	455.072	90.3616
1976-11-01	157.386	454.784	91.018
1976-12-01	157.046	454.943	91.3053
1977-01-01	156.778	455.039	91.5258
1977-02-01	156.566	455.093	91.6969
1977-03-01	156.203	455.165	91.986
1977-04-01	155.753	455.208	92.3393
1977-05-01	156.551	451.054	92.8884
1977-06-01	160.69	440.258	93.5337
1977-07-01	163.393	435.799	94.319
1977-08-01	163.641	433.919	95.4616
1977-09-01	162.491	434.508	96.7037
1977-10-01	161.58	434.273	97.6837
1977-11-01	161.128	433.946	98.2469
1977-12-01	160.849	434.022	98.5024
1978-01-01	160.667	434.102	98.6488
1978-02-01	160.528	434.148	98.7553
1978-03-01	160.353	434.198	98.8921
1978-04-01	159.864	434.293	99.2755
1978-05-01	160.344	430.444	99.8466
1978-06-01	163.606	420.153	100.474
1978-07-01	166.026	415.206	101.179
1978-08-01	165.929	414.663	102.236
1978-09-01	164.738	415.312	103.399
1978-10-01	163.799	415.152	104.327
1978-11-01	163.212	414.901	104.947
1978-12-01	162.844	414.994	105.267
1979-01-01	162.666	415.042	105.409
1979-02-01	162.43	415.093	105.599
1979-03-01	162.152	415.133	105.819
1979-04-01	161.779	415.151	106.113
1979-05-01	162.202	412.323	106.491
1979-06-01	165.898	401.339	106.965
1979-07-01	166.991	399.977	107.637
1979-08-01	166.741	398.161	108.695
1979-09-01	165.56	399.097	109.698
1979-10-01	164.693	399.155	110.457
1979-11-01	163.959	399.283	111.047
1979-12-01	163.697	399.319	111.26
1980-01-01	163.531	399.329	111.391
1980-02-01	163.336	399.336	111.545
1980-03-01	163.083	399.342	111.745
1980-04-01	162.814	399.328	111.955
1980-05-01	163.139	396.247	112.297
1980-06-01	165.474	386.465	112.774
1980-07-01	167.06	382.061	113.335
1980-08-01	167.224	379.592	114.149
1980-09-01	166.394	380.134	115.032
1980-10-01	165.562	379.974	115.842
1980-11-01	165.001	379.701	116.398
1980-12-01	164.726	379.787	116.64
1981-01-01	164.545	379.872	116.786
1981-02-01	164.394	379.92	116.902
1981-03-01	164.192	379.971	117.06
1981-04-01	163.75	380.014	117.4
1981-05-01	164.03	376.334	117.71
1981-06-01	166.448	363.502	118.099
1981-07-01	167.885	358.849	118.602
1981-08-01	167.938	356.752	119.415
1981-09-01	166.942	358.215	120.285
1981-10-01	166.085	358.538	121.007
1981-11-01	165.564	358.499	121.454
1981-12-01	165.349	358.54	121.63
1982-01-01	165.244	358.555	121.707
1982-02-01	165.142	358.564	121.78
1982-03-01	164.964	358.584	121.916
1982-04-01	164.695	358.583	122.124
1982-05-01	164.934	355.039	122.402
1982-06-01	166.897	343.577	122.736
1982-07-01	167.917	339.835	123.176
1982-08-01	168.116	336.855	123.867
1982-09-01	167.242	338.188	124.629
1982-10-01	166.455	338.453	125.295
1982-11-01	165.901	338.525	125.752
1982-12-01	165.671	338.588	125.936
1983-01-01	165.53	338.608	126.043
1983-02-01	165.409	338.616	126.131
1983-03-01	165.244	338.626	126.256
1983-04-01	164.955	338.62	126.474
1983-05-01	165.123	334.894	126.756
1983-06-01	166.653	324.055	127.093
1983-07-01	167.599	319.785	127.452
1983-08-01	167.81	316.763	128.04
1983-09-01	167.161	317.675	128.693
1983-10-01	166.496	317.687	129.293
1983-11-01	166.118	317.703	129.626
1983-12-01	165.907	317.835	129.79
1984-01-01	165.813	317.868	129.855
1984-02-01	165.712	317.896	129.925
1984-03-01	165.512	317.946	130.074
1984-04-01	165.261	317.969	130.259
1984-05-01	165.267	315.58	130.483
1984-06-01	166.553	304.781	130.773
1984-07-01	167.197	301.198	131.138
1984-08-01	167.158	298.578	131.69
1984-09-01	166.501	299.262	132.287
1984-10-01	165.957	299.067	132.782
1984-11-01	165.57	299.438	133.085
1984-12-01	165.37	299.523	133.238
1985-01-01	165.276	299.541	133.302
1985-02-01	165.161	299.559	133.383
1985-03-01	165.001	299.578	133.499
1985-04-01	164.789	299.584	133.652
1985-05-01	164.775	296.394	133.902
1985-06-01	165.541	287.45	134.196
1985-07-01	165.633	286.099	134.534
1985-08-01	165.348	284.51	135.001
1985-09-01	164.825	284.567	135.468
1985-10-01	164.381	284.448	135.856
1985-11-01	164.074	284.739	136.094
1985-12-01	163.927	284.8	136.203
1986-01-01	163.833	284.82	136.267
1986-02-01	163.759	284.827	136.314
1986-03-01	163.65	284.839	136.389
1986-04-01	163.46	284.843	136.527
1986-05-01	163.462	282.383	136.686
1986-06-01	164.11	273.723	136.9
1986-07-01	164.379	270.754	137.174
1986-08-01	164.367	267.991	137.544
1986-09-01	163.961	268.504	137.938
1986-10-01	163.592	268.374	138.276
1986-11-01	163.314	268.375	138.515
1986-12-01	163.184	268.497	138.612
1987-01-01	163.097	268.546	138.669
1987-02-01	163.041	268.563	138.699
1987-03-01	162.923	268.604	138.78
1987-04-01	162.768	268.629	138.888
1987-05-01	162.697	266.094	139.073
1987-06-01	163.289	257.169	139.252
1987-07-01	163.462	254.929	139.482
1987-08-01	163.215	253.795	139.838
1987-09-01	162.795	253.905	140.202
1987-10-01	162.4	254.005	140.515
1987-11-01	162.164	254.219	140.695
1987-12-01	162.055	254.259	140.772
1988-01-01	161.983	254.27	140.816
1988-02-01	161.906	254.277	140.863
1988-03-01	161.832	254.279	140.907
1988-04-01	161.683	254.275	141.009
1988-05-01	161.621	251.929	141.15
1988-06-01	161.953	244.45	141.313
1988-07-01	162.089	241.471	141.512
1988-08-01	161.953	239.421	141.798
1988-09-01	161.599	239.861	142.101
1988-10-01	161.269	239.968	142.366
1988-11-01	161.014	240.232	142.558
1988-12-01	160.931	240.257	142.612
1989-01-01	160.855	240.269	142.659
1989-02-01	160.78	240.275	142.703
1989-03-01	160.702	240.276	142.75
1989-04-01	160.587	240.267	142.825
1989-05-01	160.519	238.239	142.935
1989-06-01	160.726	230.927	143.085
1989-07-01	160.765	228.199	143.27
1989-08-01	160.545	226.658	143.515
1989-09-01	160.248	227.029	143.757
1989-10-01	159.986	226.876	143.966
1989-11-01	159.764	226.835	144.133
1989-12-01	159.678	226.922	144.19
1990-01-01	159.638	226.938	144.205
1990-02-01	159.568	226.972	144.247
1990-03-01	159.493	226.993	144.291
1990-04-01	159.388	227	144.358
1990-05-01	159.285	224.683	144.461
1990-06-01	159.283	217.89	144.593
1990-07-01	159.227	214.962	144.74
1990-08-01	159.009	213.914	144.921
1990-09-01	158.754	214.477	145.111
1990-10-01	158.556	214.399	145.261
1990-11-01	158.391	214.251	145.379
1990-12-01	158.308	214.269	145.431
1991-01-01	158.247	214.319	145.464
1991-02-01	158.197	214.342	145.488
1991-03-01	158.137	214.36	145.519
1991-04-01	158.041	214.372	145.577
1991-05-01	157.891	211.941	145.67
1991-06-01	157.723	205.328	145.78
1991-07-01	157.544	202.375	145.903
1991-08-01	157.285	201.811	146.048
1991-09-01	157.088	202.448	146.188
1991-10-01	156.921	202.549	146.306
1991-11-01	156.802	202.512	146.385
1991-12-01	156.747	202.541	146.414
1992-01-01	156.704	202.554	146.432
1992-02-01	156.654	202.564	146.454
1992-03-01	156.609	202.565	146.473
1992-04-01	156.539	202.559	146.511
1992-05-01	156.398	200.583	146.563
1992-06-01	156.077	193.733	146.631
1992-07-01	155.833	192.489	146.717
1992-08-01	155.591	191.48	146.814
1992-09-01	155.429	191.691	146.904
1992-10-01	155.296	191.51	146.979
1992-11-01	155.191	191.342	147.034
1992-12-01	155.139	191.396	147.058
1993-01-01	155.104	191.441	147.069
1993-02-01	155.074	191.462	147.075
1993-03-01	155.04	191.48	147.085
1993-04-01	154.993	191.493	147.104
1993-05-01	154.859	189.955	147.133
1993-06-01	154.447	184.119	147.179
1993-07-01	154.108	181.913	147.238
1993-08-01	153.815	180.395	147.297
1993-09-01	153.696	181.015	147.351
1993-10-01	153.622	181.183	147.394
1993-11-01	153.564	181.17	147.421
1993-12-01	153.53	181.205	147.432
1994-01-01	153.505	181.214	147.434
1994-02-01	153.479	181.22	147.436
1994-03-01	153.448	181.224	147.443
1994-04-01	153.405	181.219	147.458
1994-05-01	153.213	179.232	147.482
1994-06-01	152.62	173.144	147.52
1994-07-01	152.207	171.031	147.556
1994-08-01	151.88	169.631	147.576
1994-09-01	151.785	170.03	147.589
1994-10-01	151.724	169.986	147.597
1994-11-01	151.7	170.184	147.605
1994-12-01	151.682	170.213	147.603
1995-01-01	151.666	170.218	147.597
1995-02-01	151.648	170.223	147.593
1995-03-01	151.627	170.228	147.592
1995-04-01	151.605	170.223	147.591
1995-05-01	151.426	168.7	147.599
1995-06-01	150.769	163.396	147.618
1995-07-01	150.373	162.12	147.636
1995-08-01	150.113	161.146	147.625
1995-09-01	150.036	161.247	147.611
1995-10-01	149.98	161.066	147.597
1995-11-01	149.932	160.912	147.589
1995-12-01	149.915	160.97	147.58
1996-01-01	149.904	161.003	147.571
1996-02-01	149.892	161.018	147.561
1996-03-01	149.88	161.023	147.551
1996-04-01	149.867	161.04	147.543
1996-05-01	149.605	159.055	147.541
1996-06-01	148.879	154.46	147.545
1996-07-01	148.293	152.168	147.539
1996-08-01	148.042	151.697	147.5
1996-09-01	148.032	151.955	147.443
1996-10-01	148.033	151.887	147.395
1996-11-01	148.04	151.952	147.368
1996-12-01	148.039	151.986	147.351
1997-01-01	148.032	151.992	147.337
1997-02-01	148.025	151.995	147.323
1997-03-01	148.022	152.005	147.308
1997-04-01	148.015	152.001	147.293
1997-05-01	147.843	150.864	147.28
1997-06-01	146.979	145.969	147.267
1997-07-01	146.359	144.113	147.248
1997-08-01	145.996	142.997	147.178
1997-09-01	145.989	143.266	147.092
1997-10-01	145.998	143.143	147.016
1997-11-01	146.019	143.15	146.963
1997-12-01	146.03	143.203	146.937
1998-01-01	146.026	143.21	146.919
1998-02-01	146.026	143.22	146.9
1998-03-01	146.034	143.235	146.876
1998-04-01	146.039	143.234	146.852
1998-05-01	145.815	141.91	146.826
1998-06-01	144.87	137.505	146.802
1998-07-01	144.16	135.684	146.763
1998-08-01	143.765	134.562	146.661
1998-09-01	143.861	135.142	146.537
1998-10-01	143.964	135.202	146.43
1998-11-01	144.031	135.248	146.363
1998-12-01	144.057	135.265	146.325
1999-01-01	144.056	135.26	146.305
1999-02-01	144.057	135.254	146.284
1999-03-01	144.068	135.25	146.256
1999-04-01	144.084	135.237	146.224
1999-05-01	143.782	133.666	146.188
1999-06-01	142.75	129.644	146.151
1999-07-01	141.978	127.875	146.094
1999-08-01	141.652	127.185	145.971
1999-09-01	141.74	127.503	145.823
1999-10-01	141.809	127.4	145.699
1999-11-01	141.866	127.375	145.612
1999-12-01	141.894	127.418	145.571
2000-01-01	141.914	127.437	145.535
2000-02-01	141.932	127.445	145.501
2000-03-01	141.948	127.446	145.469
2000-04-01	141.982	127.439	145.425
2000-05-01	141.652	125.917	145.375
2000-06-01	140.45	121.927	145.326
2000-07-01	139.583	120.276	145.249
2000-08-01	139.268	119.652	145.089
2000-09-01	139.394	119.909	144.899
2000-10-01	139.504	119.837	144.746
2000-11-01	139.615	119.961	144.649
2000-12-01	139.651	119.976	144.6
2001-01-01	139.668	119.976	144.566
2001-02-01	139.683	119.972	144.534
2001-03-01	139.698	119.967	144.502
2001-04-01	139.737	119.957	144.453
2001-05-01	139.389	118.515	144.391
2001-06-01	138.121	114.821	144.326
2001-07-01	137.628	114.378	144.23
2001-08-01	137.438	113.727	144.045
2001-09-01	137.523	113.783	143.87
2001-10-01	137.592	113.628	143.722
2001-11-01	137.615	113.511	143.63
2001-12-01	137.658	113.566	143.573
2002-01-01	137.675	113.583	143.539
2002-02-01	137.691	113.593	143.505
2002-03-01	137.725	113.606	143.459
2002-04-01	137.756	113.604	143.415
2002-05-01	137.385	112.184	143.349
2002-06-01	136.308	109.209	143.276
2002-07-01	135.863	108.721	143.167
2002-08-01	135.739	108.272	142.984
2002-09-01	135.922	108.547	142.807
2002-10-01	136.054	108.528	142.665
2002-11-01	136.12	108.522	142.583
2002-12-01	136.154	108.534	142.536
2003-01-01	136.16	108.53	142.509
2003-02-01	136.164	108.524	142.484
2003-03-01	136.178	108.52	142.452
2003-04-01	136.221	108.517	142.398
2003-05-01	135.874	107.213	142.331
2003-06-01	134.614	103.863	142.262
2003-07-01	133.72	102.467	142.159
2003-08-01	133.34	101.719	141.961
2003-09-01	133.488	101.955	141.736
2003-10-01	133.634	101.88	141.539
2003-11-01	133.763	101.994	141.424
2003-12-01	133.821	102.015	141.359
2004-01-01	133.839	102.014	141.322
2004-02-01	133.863	102.013	141.282
2004-03-01	133.892	102.01	141.239
2004-04-01	133.939	102.001	141.181
2004-05-01	133.57	100.722	141.105
2004-06-01	132.321	97.6713	141.022
2004-07-01	131.749	97.0505	140.905
2004-08-01	131.494	96.3748	140.691
2004-09-01	131.594	96.4183	140.476
2004-10-01	131.679	96.2808	140.302
2004-11-01	131.794	96.3235	140.173
2004-12-01	131.844	96.3546	140.113
2005-01-01	131.871	96.363	140.07
2005-02-01	131.909	96.3698	140.02
2005-03-01	131.968	96.3751	139.955
2005-04-01	132.02	96.3664	139.895
2005-05-01	131.691	95.2887	139.827
2005-06-01	130.184	91.757	139.747
2005-07-01	129.25	90.5899	139.637
2005-08-01	128.673	89.4995	139.403
2005-09-01	128.846	89.7827	139.133
2005-10-01	129.089	89.8451	138.894
2005-11-01	129.246	89.9272	138.76
2005-12-01	129.3	89.9367	138.697
2006-01-01	129.332	89.9362	138.651
2006-02-01	129.347	89.9304	138.618
2006-03-01	129.386	89.9273	138.567
2006-04-01	129.467	89.9201	138.487
2006-05-01	129.095	88.7074	138.385
2006-06-01	127.589	85.543	138.291
2006-07-01	126.837	84.8041	138.155
2006-08-01	126.531	84.1515	137.897
2006-09-01	126.714	84.2525	137.627
2006-10-01	127.003	84.3842	137.389
2006-11-01	127.201	84.4405	137.228
2006-12-01	127.279	84.4423	137.147
2007-01-01	127.301	84.4346	137.108
2007-02-01	127.325	84.4265	137.067
2007-03-01	127.357	84.4182	137.021
2007-04-01	127.409	84.4061	136.959
2007-05-01	127.145	83.5997	136.88
2007-06-01	125.722	80.6264	136.776
2007-07-01	124.687	79.3515	136.641
2007-08-01	124.175	78.5338	136.389
2007-09-01	124.357	78.7448	136.103
2007-10-01	124.626	78.7897	135.838
2007-11-01	124.841	78.8776	135.661
2007-12-01	124.915	78.8836	135.582
2008-01-01	124.95	78.8793	135.532
2008-02-01	124.995	78.8745	135.475
2008-03-01	125.046	78.8681	135.415
2008-04-01	125.113	78.8576	135.344
2008-05-01	124.73	77.8285	135.248
2008-06-01	122.966	74.6769	135.149
2008-07-01	122.159	74.0845	134.996
2008-08-01	121.882	73.4961	134.697
2008-09-01	122.189	73.7789	134.399
2008-10-01	122.47	73.7879	134.138
2008-11-01	122.632	73.7988	133.985
2008-12-01	122.709	73.8082	133.905
2009-01-01	122.734	73.8034	133.863
2009-02-01	122.755	73.797	133.824
2009-03-01	122.784	73.7907	133.78
2009-04-01	122.834	73.7825	133.72
2009-05-01	122.38	72.6871	133.625
2009-06-01	121.025	70.3671	133.509
2009-07-01	120.061	69.3137	133.35
2009-08-01	119.704	68.8238	133.082
2009-09-01	119.959	69.0069	132.778
2009-10-01	120.234	69.0274	132.514
2009-11-01	120.419	69.0849	132.356
2009-12-01	120.503	69.091	132.27
2010-01-01	120.53	69.0852	132.227
2010-02-01	120.562	69.079	132.179
2010-03-01	120.617	69.0733	132.116
2010-04-01	120.68	69.0625	132.046
2010-05-01	120.464	68.485	131.953
2010-06-01	118.666	65.5246	131.826
2010-07-01	117.465	64.4663	131.663
2010-08-01	117.108	63.9762	131.35
2010-09-01	117.401	64.1579	131.005
2010-10-01	117.681	64.1271	130.71
2010-11-01	117.876	64.196	130.543
2010-12-01	117.981	64.2079	130.441
2011-01-01	118.018	64.2038	130.389
2011-02-01	118.089	64.2011	130.313
2011-03-01	118.157	64.1953	130.239
2011-04-01	118.229	64.1856	130.162
2011-05-01	117.878	63.4204	130.07
2011-06-01	116.312	61.0328	129.939
2011-07-01	115.245	60.0757	129.775
2011-08-01	114.824	59.5174	129.475
2011-09-01	115.113	59.7105	129.137
2011-10-01	115.461	59.7851	128.84
2011-11-01	115.714	59.8324	128.635
2011-12-01	115.814	59.8322	128.534
2012-01-01	115.847	59.8244	128.486
2012-02-01	115.875	59.8158	128.441
2012-03-01	115.942	59.8081	128.367
2012-04-01	116.03	59.7966	128.278
2012-05-01	115.629	58.9704	128.179
2012-06-01	113.841	56.4566	128.054
2012-07-01	112.636	55.473	127.883
2012-08-01	112.316	55.0285	127.562
2012-09-01	112.576	55.1272	127.208
2012-10-01	112.882	55.1398	126.904
2012-11-01	113.127	55.2112	126.705
2012-12-01	113.255	55.2204	126.585
2013-01-01	113.292	55.2143	126.533
2013-02-01	113.332	55.2073	126.479
2013-03-01	113.422	55.2017	126.39
2013-04-01	113.503	55.1898	126.305
2013-05-01	113.116	54.3635	126.2
2013-06-01	111.227	51.6493	126.059
2013-07-01	109.966	50.6148	125.88
2013-08-01	109.557	50.0161	125.544
2013-09-01	109.876	50.1995	125.16
2013-10-01	110.232	50.2689	124.844
2013-11-01	110.531	50.334	124.606
2013-12-01	110.639	50.3349	124.499
2014-01-01	110.697	50.3287	124.43
2014-02-01	110.749	50.3211	124.367
2014-03-01	110.812	50.3128	124.298
2014-04-01	110.94	50.3	124.182
2014-05-01	110.503	49.3758	124.077
2014-06-01	108.364	46.321	123.952
2014-07-01	106.888	45.1113	123.764
2014-08-01	106.768	44.9567	123.387
2014-09-01	107.081	44.9502	122.97
2014-10-01	107.336	44.8747	122.653
2014-11-01	107.63	44.951	122.406
2014-12-01	107.731	44.9633	122.304

## Sheet: using 14C age (inaccurate)
time	bulk_14c	LF_14c	HF_14c
1950-01-01	-25.7187	-21.7142	-26.3451
1950-02-01	-25.7301	-21.7226	-26.3533
1950-03-01	-25.7421	-21.7308	-26.3608
1950-04-01	-25.7548	-21.7398	-26.3678
1950-05-01	-25.7562	-21.8605	-26.3737
1950-06-01	-25.7399	-22.0877	-26.3787
1950-07-01	-25.7413	-22.137	-26.382
1950-08-01	-25.7558	-22.1476	-26.3828
1950-09-01	-25.774	-22.1511	-26.3835
1950-10-01	-25.7907	-22.1642	-26.3856
1950-11-01	-25.8043	-22.1776	-26.3909
1950-12-01	-25.816	-22.1862	-26.3986
1951-01-01	-25.8271	-22.1945	-26.407
1951-02-01	-25.8374	-22.2038	-26.4163
1951-03-01	-25.849	-22.2121	-26.4243
1951-04-01	-25.8617	-22.2206	-26.4312
1951-05-01	-25.8674	-22.3253	-26.4368
1951-06-01	-25.8606	-22.5275	-26.4416
1951-07-01	-25.8665	-22.57	-26.4453
1951-08-01	-25.8808	-22.5753	-26.4473
1951-09-01	-25.8981	-22.5775	-26.4491
1951-10-01	-25.915	-22.5837	-26.4521
1951-11-01	-25.9286	-22.5925	-26.4579
1951-12-01	-25.9402	-22.601	-26.4658
1952-01-01	-25.9514	-22.6101	-26.4741
1952-02-01	-25.9625	-22.6194	-26.4826
1952-03-01	-25.9739	-22.6287	-26.4908
1952-04-01	-25.9867	-22.6385	-26.4977
1952-05-01	-25.9899	-22.7422	-26.5045
1952-06-01	-25.9816	-22.9258	-26.51
1952-07-01	-25.9826	-22.9919	-26.5146
1952-08-01	-25.9932	-23.008	-26.5175
1952-09-01	-26.0099	-23.002	-26.5199
1952-10-01	-26.0261	-23.0073	-26.5232
1952-11-01	-26.0402	-23.0165	-26.5285
1952-12-01	-26.0522	-23.0251	-26.536
1953-01-01	-26.0631	-23.0343	-26.5447
1953-02-01	-26.0742	-23.0435	-26.5531
1953-03-01	-26.0853	-23.0528	-26.5616
1953-04-01	-26.0974	-23.0625	-26.5691
1953-05-01	-26.1009	-23.1511	-26.5759
1953-06-01	-26.0905	-23.3232	-26.5813
1953-07-01	-26.0896	-23.3859	-26.5861
1953-08-01	-26.0998	-23.3776	-26.5889
1953-09-01	-26.1164	-23.3743	-26.591
1953-10-01	-26.1325	-23.3802	-26.5944
1953-11-01	-26.1468	-23.3884	-26.5997
1953-12-01	-26.1584	-23.3977	-26.6076
1954-01-01	-26.169	-23.4073	-26.6165
1954-02-01	-26.1796	-23.417	-26.6255
1954-03-01	-26.1913	-23.4265	-26.6334
1954-04-01	-26.2026	-23.4363	-26.6417
1954-05-01	-26.2048	-23.4729	-26.6491
1954-06-01	-26.1795	-23.5679	-26.6554
1954-07-01	-26.1712	-23.5991	-26.6605
1954-08-01	-26.1722	-23.5657	-26.6627
1954-09-01	-26.1879	-23.5684	-26.6643
1954-10-01	-26.2041	-23.5762	-26.6669
1954-11-01	-26.2171	-23.5848	-26.6728
1954-12-01	-26.2289	-23.595	-26.6804
1955-01-01	-26.2399	-23.6052	-26.689
1955-02-01	-26.2506	-23.6153	-26.6979
1955-03-01	-26.2619	-23.6255	-26.7063
1955-04-01	-26.2736	-23.6354	-26.7142
1955-05-01	-26.2612	-23.5757	-26.7209
1955-06-01	-26.2075	-23.4383	-26.7266
1955-07-01	-26.1835	-23.403	-26.7307
1955-08-01	-26.1616	-23.2403	-26.7307
1955-09-01	-26.1753	-23.2676	-26.7297
1955-10-01	-26.1922	-23.2764	-26.7288
1955-11-01	-26.2069	-23.286	-26.7321
1955-12-01	-26.2197	-23.2993	-26.7388
1956-01-01	-26.2313	-23.3118	-26.7469
1956-02-01	-26.2425	-23.3235	-26.7554
1956-03-01	-26.2551	-23.3363	-26.7626
1956-04-01	-26.269	-23.3467	-26.7685
1956-05-01	-26.2156	-22.971	-26.7744
1956-06-01	-26.0264	-22.0386	-26.78
1956-07-01	-25.9379	-21.8525	-26.7816
1956-08-01	-25.8613	-21.4037	-26.7702
1956-09-01	-25.8496	-21.3312	-26.7574
1956-10-01	-25.8502	-21.2502	-26.7456
1956-11-01	-25.8545	-21.1988	-26.7409
1956-12-01	-25.8698	-21.2351	-26.7431
1957-01-01	-25.886	-21.2725	-26.7473
1957-02-01	-25.8998	-21.2961	-26.7536
1957-03-01	-25.9156	-21.3222	-26.7582
1957-04-01	-25.9341	-21.3418	-26.76
1957-05-01	-25.7296	-19.8725	-26.761
1957-06-01	-25.1423	-16.6879	-26.7598
1957-07-01	-24.8057	-15.7146	-26.7484
1957-08-01	-24.6249	-14.9898	-26.703
1957-09-01	-24.6621	-15.277	-26.6481
1957-10-01	-24.7317	-15.4135	-26.5967
1957-11-01	-24.7722	-15.4215	-26.5697
1957-12-01	-24.7961	-15.4638	-26.5673
1958-01-01	-24.8117	-15.4853	-26.5717
1958-02-01	-24.8288	-15.5078	-26.575
1958-03-01	-24.8519	-15.5358	-26.5734
1958-04-01	-24.8751	-15.5515	-26.5709
1958-05-01	-24.4134	-12.3144	-26.5583
1958-06-01	-23.2001	-5.98623	-26.5499
1958-07-01	-22.379	-3.53368	-26.5192
1958-08-01	-21.8367	-1.41223	-26.4115
1958-09-01	-21.8971	-2.13166	-26.2726
1958-10-01	-22.0021	-2.31649	-26.1559
1958-11-01	-22.0806	-2.29449	-26.0716
1958-12-01	-22.1336	-2.39345	-26.0414
1959-01-01	-22.1623	-2.443	-26.0345
1959-02-01	-22.1954	-2.49297	-26.0244
1959-03-01	-22.2269	-2.53303	-26.0157
1959-04-01	-22.2638	-2.55837	-26.0012
1959-05-01	-21.8109	0.570097	-25.9799
1959-06-01	-19.4777	13.1457	-25.9383
1959-07-01	-18.0908	16.7353	-25.8729
1959-08-01	-17.3749	19.2073	-25.6711
1959-09-01	-17.4743	18.3935	-25.4229
1959-10-01	-17.6037	18.5805	-25.1984
1959-11-01	-17.6855	18.6979	-25.0677
1959-12-01	-17.7559	18.4972	-25.0261
1960-01-01	-17.7917	18.4177	-25.0125
1960-02-01	-17.819	18.365	-25.0063
1960-03-01	-17.8911	18.2374	-24.9643
1960-04-01	-17.9801	18.1613	-24.9057
1960-05-01	-17.0324	24.3695	-24.849
1960-06-01	-13.9128	40.1348	-24.7733
1960-07-01	-12.5465	42.445	-24.6408
1960-08-01	-12.2802	42.6432	-24.3148
1960-09-01	-12.6008	41.6542	-23.9744
1960-10-01	-12.909	41.3876	-23.6982
1960-11-01	-13.0765	41.251	-23.5602
1960-12-01	-13.161	41.1477	-23.505
1961-01-01	-13.1996	41.1073	-23.4884
1961-02-01	-13.2521	41.0594	-23.4604
1961-03-01	-13.3342	41.0008	-23.4091
1961-04-01	-13.4196	40.9856	-23.3512
1961-05-01	-12.5688	46.4501	-23.2663
1961-06-01	-8.93497	63.7714	-23.1738
1961-07-01	-7.39777	66.1718	-23.0289
1961-08-01	-6.91727	66.9994	-22.663
1961-09-01	-7.19674	66.1224	-22.2642
1961-10-01	-7.40555	66.3207	-21.9514
1961-11-01	-7.55883	66.5623	-21.7235
1961-12-01	-7.64691	66.4619	-21.6441
1962-01-01	-7.70481	66.359	-21.6104
1962-02-01	-7.77314	66.2557	-21.5686
1962-03-01	-7.87527	66.1343	-21.5003
1962-04-01	-7.99694	66.0654	-21.4129
1962-05-01	-7.01426	71.7197	-21.3063
1962-06-01	-3.85754	85.3432	-21.1756
1962-07-01	-2.22272	88.6425	-20.9767
1962-08-01	-1.50343	91.0957	-20.5722
1962-09-01	-1.67416	90.8088	-20.1197
1962-10-01	-1.79493	91.3931	-19.7717
1962-11-01	-1.93157	91.7333	-19.5033
1962-12-01	-1.99588	91.6309	-19.4425
1963-01-01	-2.07824	91.4434	-19.387
1963-02-01	-2.13339	91.3381	-19.3553
1963-03-01	-2.22066	91.1944	-19.297
1963-04-01	-2.44972	90.9911	-19.1267
1963-05-01	-0.916529	100.094	-18.9726
1963-06-01	3.9321	121.236	-18.8063
1963-07-01	5.9119	123.954	-18.536
1963-08-01	6.54129	127.148	-17.9598
1963-09-01	6.17126	126.264	-17.3744
1963-10-01	5.71553	125.896	-16.8872
1963-11-01	5.52497	125.933	-16.6604
1963-12-01	5.37945	125.709	-16.5416
1964-01-01	5.26159	125.517	-16.4564
1964-02-01	5.16986	125.393	-16.3933
1964-03-01	5.06015	125.272	-16.3164
1964-04-01	4.84357	125.197	-16.1489
1964-05-01	6.91793	139.612	-15.9718
1964-06-01	14.3643	178.725	-15.7657
1964-07-01	17.4059	182.688	-15.4066
1964-08-01	18.3798	186.43	-14.5805
1964-09-01	17.6743	183.539	-13.7212
1964-10-01	16.9748	182.615	-13.0511
1964-11-01	16.4474	181.735	-12.6414
1964-12-01	16.2007	181.447	-12.4476
1965-01-01	16.059	181.319	-12.3405
1965-02-01	15.9275	181.22	-12.2424
1965-03-01	15.7167	181.103	-12.0828
1965-04-01	15.4929	181.135	-11.9013
1965-05-01	18.1359	199.843	-11.7077
1965-06-01	28.3007	254.647	-11.4303
1965-07-01	32.5151	261.076	-11.0129
1965-08-01	33.6366	261.993	-9.9738
1965-09-01	32.7616	258.593	-8.84912
1965-10-01	31.6415	256.88	-7.87682
1965-11-01	31.0833	256.336	-7.38478
1965-12-01	30.805	255.983	-7.16087
1966-01-01	30.6775	255.847	-7.06297
1966-02-01	30.5254	255.71	-6.94598
1966-03-01	30.2893	255.544	-6.76286
1966-04-01	30.0021	255.482	-6.53238
1966-05-01	32.703	273.502	-6.24268
1966-06-01	43.0978	324.844	-5.89643
1966-07-01	48.8258	337.074	-5.34934
1966-08-01	51.196	341.799	-4.15362
1966-09-01	50.0142	336.462	-2.78404
1966-10-01	48.6794	334.585	-1.59793
1966-11-01	47.8577	334.197	-0.861209
1966-12-01	47.5988	333.95	-0.648322
1967-01-01	47.4601	333.821	-0.541335
1967-02-01	47.3023	333.692	-0.419191
1967-03-01	47.0798	333.543	-0.245707
1967-04-01	46.7408	333.414	0.0220503
1967-05-01	48.2473	342.528	0.329486
1967-06-01	58.0552	384.849	0.795196
1967-07-01	64.9514	401.074	1.33754
1967-08-01	68.3714	406.347	2.49565
1967-09-01	67.5471	402.281	3.93186
1967-10-01	66.0547	399.942	5.14996
1967-11-01	65.1721	399.668	5.9634
1967-12-01	64.5072	399.326	6.50927
1968-01-01	64.1931	399.138	6.75142
1968-02-01	63.9652	399.025	6.9234
1968-03-01	63.6765	398.911	7.14092
1968-04-01	63.2217	398.835	7.4844
1968-05-01	65.7121	409.716	7.94244
1968-06-01	74.7373	436.899	8.45877
1968-07-01	80.4329	446.121	9.23246
1968-08-01	81.7445	446.457	10.6584
1968-09-01	80.258	444.403	12.2309
1968-10-01	79.1744	444.505	13.4704
1968-11-01	78.3646	444.064	14.1586
1968-12-01	78.0286	443.874	14.4267
1969-01-01	77.7548	443.745	14.6443
1969-02-01	77.5563	443.664	14.7985
1969-03-01	77.2879	443.574	15.0073
1969-04-01	76.7361	443.48	15.4293
1969-05-01	78.8427	449.814	15.8918
1969-06-01	86.183	465.246	16.5154
1969-07-01	91.1665	471.504	17.3016
1969-08-01	92.5261	471.967	18.5983
1969-09-01	90.8959	470.236	20.1692
1969-10-01	89.4645	469.766	21.3567
1969-11-01	88.8036	469.718	21.9563
1969-12-01	88.4858	469.641	22.2183
1970-01-01	88.3111	469.59	22.3544
1970-02-01	88.1762	469.552	22.4559
1970-03-01	87.7817	469.48	22.7611
1970-04-01	87.4054	469.439	23.0543
1970-05-01	88.678	472.222	23.4479
1970-06-01	96.4736	483.271	23.899
1970-07-01	100.644	486.254	24.5831
1970-08-01	101.719	486.712	25.8612
1970-09-01	100.425	485.869	27.3105
1970-10-01	99.3387	485.798	28.4486
1970-11-01	98.6401	485.864	29.2217
1970-12-01	98.3034	485.796	29.5196
1971-01-01	98.0332	485.728	29.7297
1971-02-01	97.7497	485.669	29.9469
1971-03-01	97.4928	485.623	30.1415
1971-04-01	97.0969	485.582	30.4449
1971-05-01	97.9697	486.816	30.8292
1971-06-01	104.124	492.307	31.469
1971-07-01	107.073	493.614	32.2312
1971-08-01	107.449	493.507	33.4632
1971-09-01	106.422	493.21	34.7328
1971-10-01	105.306	493.155	35.8498
1971-11-01	104.823	493.194	36.468
1971-12-01	104.303	493.139	36.9055
1972-01-01	104.043	493.104	37.1074
1972-02-01	103.952	493.083	37.1696
1972-03-01	103.708	493.054	37.3555
1972-04-01	103.169	493.021	37.7597
1972-05-01	104.234	493.627	38.2002
1972-06-01	110.677	495.916	38.7859
1972-07-01	113.287	496.301	39.5387
1972-08-01	113.589	495.736	40.8141
1972-09-01	112.545	495.483	42.0757
1972-10-01	111.645	495.386	43.1011
1972-11-01	111.086	495.328	43.7778
1972-12-01	110.66	495.321	44.1468
1973-01-01	110.468	495.312	44.2949
1973-02-01	110.258	495.303	44.4562
1973-03-01	109.835	495.297	44.7755
1973-04-01	109.435	495.286	45.0808
1973-05-01	110.507	494.825	45.4676
1973-06-01	116.448	493.295	45.9594
1973-07-01	119.45	492.895	46.6565
1973-08-01	120.568	491.757	47.8262
1973-09-01	119.319	491.65	49.1055
1973-10-01	117.872	491.772	50.2299
1973-11-01	117.087	491.758	50.8912
1973-12-01	116.648	491.768	51.2419
1974-01-01	116.491	491.764	51.3611
1974-02-01	116.295	491.76	51.5089
1974-03-01	115.925	491.762	51.7875
1974-04-01	115.507	491.749	52.1041
1974-05-01	116.191	490.535	52.3845
1974-06-01	121.645	484.623	52.9119
1974-07-01	124.424	483.067	53.5649
1974-08-01	125.095	482.008	54.6409
1974-09-01	124.077	481.846	55.8404
1974-10-01	122.835	482.137	56.8231
1974-11-01	122.016	482.156	57.4887
1974-12-01	121.619	482.183	57.8065
1975-01-01	121.334	482.202	58.0247
1975-02-01	121.087	482.21	58.2105
1975-03-01	120.815	482.213	58.4127
1975-04-01	120.373	482.208	58.739
1975-05-01	121.416	479.3	59.1825
1975-06-01	125.711	472.291	59.6862
1975-07-01	128.304	469.653	60.3019
1975-08-01	129.294	467.518	61.2822
1975-09-01	128.264	467.907	62.3957
1975-10-01	127.064	467.905	63.4596
1975-11-01	126.325	467.74	64.1626
1975-12-01	125.926	467.86	64.4711
1976-01-01	125.667	467.908	64.6718
1976-02-01	125.368	467.946	64.8992
1976-03-01	125.14	467.961	65.0695
1976-04-01	124.725	467.971	65.3782
1976-05-01	125.834	463.747	65.9261
1976-06-01	130.298	454.641	66.5057
1976-07-01	133.617	450.199	67.185
1976-08-01	134.249	448.334	68.202
1976-09-01	133.178	448.769	69.4
1976-10-01	132.224	448.605	70.385
1976-11-01	131.707	448.325	70.978
1976-12-01	131.381	448.471	71.2367
1977-01-01	131.124	448.559	71.4349
1977-02-01	130.92	448.608	71.5885
1977-03-01	130.573	448.673	71.8484
1977-04-01	130.144	448.712	72.1658
1977-05-01	131.008	444.79	72.6589
1977-06-01	135.298	434.613	73.2368
1977-07-01	138.135	430.375	73.9453
1977-08-01	138.489	428.481	74.9941
1977-09-01	137.387	428.994	76.1404
1977-10-01	136.513	428.752	77.0453
1977-11-01	136.085	428.432	77.5638
1977-12-01	135.816	428.5	77.7983
1978-01-01	135.638	428.575	77.9322
1978-02-01	135.503	428.616	78.0295
1978-03-01	135.332	428.662	78.1546
1978-04-01	134.857	428.75	78.5063
1978-05-01	135.417	425.066	79.0295
1978-06-01	138.896	415.223	79.6026
1978-07-01	141.5	410.465	80.2504
1978-08-01	141.489	409.87	81.2375
1978-09-01	140.319	410.456	82.3317
1978-10-01	139.399	410.29	83.2035
1978-11-01	138.83	410.044	83.784
1978-12-01	138.469	410.129	84.0823
1979-01-01	138.293	410.174	84.2145
1979-02-01	138.061	410.22	84.3906
1979-03-01	137.788	410.257	84.5956
1979-04-01	137.422	410.274	84.8687
1979-05-01	137.908	407.563	85.2194
1979-06-01	141.871	397.049	85.6591
1979-07-01	143.101	395.695	86.286
1979-08-01	142.933	393.877	87.293
1979-09-01	141.757	394.747	88.2483
1979-10-01	140.891	394.792	88.9721
1979-11-01	140.159	394.911	89.5314
1979-12-01	139.899	394.945	89.7332
1980-01-01	139.735	394.953	89.8569
1980-02-01	139.541	394.96	90.0021
1980-03-01	139.29	394.965	90.1902
1980-04-01	139.025	394.95	90.3881
1980-05-01	139.422	391.96	90.7098
1980-06-01	142.024	382.476	91.1588
1980-07-01	143.82	378.172	91.6895
1980-08-01	144.108	375.677	92.4754
1980-09-01	143.291	376.153	93.3336
1980-10-01	142.458	375.974	94.1229
1980-11-01	141.903	375.696	94.6613
1980-12-01	141.626	375.776	94.8953
1981-01-01	141.443	375.856	95.0361
1981-02-01	141.29	375.902	95.1487
1981-03-01	141.087	375.95	95.301
1981-04-01	140.641	375.99	95.628
1981-05-01	141.009	372.382	95.9256
1981-06-01	143.811	359.822	96.2989
1981-07-01	145.519	355.222	96.7848
1981-08-01	145.696	353.085	97.591
1981-09-01	144.666	354.464	98.4594
1981-10-01	143.772	354.765	99.18
1981-11-01	143.236	354.722	99.6233
1981-12-01	143.015	354.76	99.7967
1982-01-01	142.908	354.774	99.8721
1982-02-01	142.802	354.782	99.9449
1982-03-01	142.62	354.8	100.079
1982-04-01	142.346	354.799	100.283
1982-05-01	142.676	351.327	100.555
1982-06-01	145.025	340.112	100.882
1982-07-01	146.293	336.405	101.316
1982-08-01	146.644	333.424	102.015
1982-09-01	145.732	334.672	102.791
1982-10-01	144.901	334.915	103.47
1982-11-01	144.319	334.979	103.932
1982-12-01	144.077	335.04	104.117
1983-01-01	143.93	335.058	104.226
1983-02-01	143.805	335.066	104.315
1983-03-01	143.633	335.074	104.439
1983-04-01	143.334	335.068	104.658
1983-05-01	143.602	331.415	104.94
1983-06-01	145.531	320.799	105.276
1983-07-01	146.75	316.583	105.637
1983-08-01	147.135	313.554	106.244
1983-09-01	146.46	314.392	106.926
1983-10-01	145.751	314.384	107.554
1983-11-01	145.35	314.392	107.9
1983-12-01	145.124	314.519	108.07
1984-01-01	145.023	314.55	108.138
1984-02-01	144.916	314.576	108.211
1984-03-01	144.703	314.624	108.365
1984-04-01	144.436	314.645	108.556
1984-05-01	144.505	312.304	108.784
1984-06-01	146.21	301.738	109.081
1984-07-01	147.124	298.193	109.456
1984-08-01	147.223	295.565	110.042
1984-09-01	146.526	296.188	110.679
1984-10-01	145.942	295.981	111.21
1984-11-01	145.515	296.336	111.532
1984-12-01	145.296	296.418	111.694
1985-01-01	145.194	296.435	111.763
1985-02-01	145.07	296.452	111.849
1985-03-01	144.896	296.47	111.972
1985-04-01	144.668	296.474	112.133
1985-05-01	144.742	293.347	112.395
1985-06-01	145.88	284.585	112.701
1985-07-01	146.122	283.218	113.058
1985-08-01	145.896	281.618	113.565
1985-09-01	145.34	281.645	114.074
1985-10-01	144.86	281.515	114.497
1985-11-01	144.517	281.795	114.754
1985-12-01	144.355	281.853	114.873
1986-01-01	144.252	281.872	114.943
1986-02-01	144.171	281.878	114.994
1986-03-01	144.052	281.889	115.076
1986-04-01	143.843	281.892	115.224
1986-05-01	143.917	279.482	115.394
1986-06-01	144.929	271.007	115.623
1986-07-01	145.426	268.071	115.916
1986-08-01	145.562	265.328	116.329
1986-09-01	145.129	265.791	116.772
1986-10-01	144.721	265.649	117.155
1986-11-01	144.411	265.643	117.424
1986-12-01	144.262	265.76	117.533
1987-01-01	144.165	265.806	117.598
1987-02-01	144.103	265.822	117.632
1987-03-01	143.969	265.861	117.723
1987-04-01	143.794	265.884	117.844
1987-05-01	143.793	263.404	118.048
1987-06-01	144.798	254.685	118.244
1987-07-01	145.187	252.464	118.499
1987-08-01	145	251.312	118.911
1987-09-01	144.532	251.395	119.335
1987-10-01	144.075	251.482	119.698
1987-11-01	143.797	251.687	119.906
1987-12-01	143.671	251.725	119.995
1988-01-01	143.588	251.735	120.047
1988-02-01	143.501	251.741	120.102
1988-03-01	143.417	251.743	120.153
1988-04-01	143.247	251.738	120.269
1988-05-01	143.256	249.445	120.429
1988-06-01	143.945	242.14	120.612
1988-07-01	144.325	239.209	120.839
1988-08-01	144.313	237.171	121.179
1988-09-01	143.912	237.572	121.546
1988-10-01	143.518	237.666	121.868
1988-11-01	143.205	237.919	122.098
1988-12-01	143.106	237.942	122.165
1989-01-01	143.017	237.954	122.222
1989-02-01	142.929	237.958	122.276
1989-03-01	142.838	237.959	122.333
1989-04-01	142.703	237.95	122.422
1989-05-01	142.7	235.97	122.551
1989-06-01	143.276	228.836	122.726
1989-07-01	143.557	226.153	122.943
1989-08-01	143.423	224.609	123.248
1989-09-01	143.075	224.949	123.556
1989-10-01	142.762	224.791	123.822
1989-11-01	142.493	224.746	124.032
1989-12-01	142.387	224.829	124.104
1990-01-01	142.34	224.844	124.126
1990-02-01	142.254	224.876	124.18
1990-03-01	142.164	224.896	124.236
1990-04-01	142.037	224.902	124.319
1990-05-01	142.009	222.635	124.446
1990-06-01	142.361	215.994	124.606
1990-07-01	142.558	213.115	124.788
1990-08-01	142.413	212.055	125.028
1990-09-01	142.09	212.584	125.289
1990-10-01	141.837	212.501	125.493
1990-11-01	141.633	212.352	125.652
1990-12-01	141.531	212.369	125.723
1991-01-01	141.453	212.416	125.769
1991-02-01	141.39	212.438	125.804
1991-03-01	141.315	212.455	125.846
1991-04-01	141.194	212.467	125.922
1991-05-01	141.122	210.085	126.043
1991-06-01	141.311	203.612	126.182
1991-07-01	141.392	200.707	126.343
1991-08-01	141.169	200.117	126.555
1991-09-01	140.889	200.724	126.768
1991-10-01	140.646	200.818	126.946
1991-11-01	140.484	200.779	127.062
1991-12-01	140.411	200.807	127.106
1992-01-01	140.355	200.819	127.135
1992-02-01	140.29	200.828	127.17
1992-03-01	140.232	200.829	127.2
1992-04-01	140.14	200.823	127.254
1992-05-01	140.067	198.883	127.327
1992-06-01	140.117	192.169	127.42
1992-07-01	140.035	190.927	127.542
1992-08-01	139.83	189.913	127.706
1992-09-01	139.615	190.104	127.862
1992-10-01	139.434	189.921	127.991
1992-11-01	139.298	189.753	128.084
1992-12-01	139.226	189.804	128.127
1993-01-01	139.177	189.847	128.15
1993-02-01	139.136	189.867	128.165
1993-03-01	139.089	189.884	128.186
1993-04-01	139.024	189.896	128.22
1993-05-01	138.942	188.386	128.268
1993-06-01	138.841	182.66	128.338
1993-07-01	138.704	180.481	128.433
1993-08-01	138.504	178.971	128.554
1993-09-01	138.315	179.561	128.679
1993-10-01	138.168	179.72	128.781
1993-11-01	138.072	179.706	128.842
1993-12-01	138.015	179.74	128.871
1994-01-01	137.979	179.748	128.883
1994-02-01	137.94	179.753	128.896
1994-03-01	137.893	179.757	128.916
1994-04-01	137.827	179.752	128.949
1994-05-01	137.707	177.801	128.996
1994-06-01	137.465	171.829	129.062
1994-07-01	137.267	169.744	129.133
1994-08-01	137.034	168.347	129.218
1994-09-01	136.881	168.723	129.303
1994-10-01	136.753	168.673	129.378
1994-11-01	136.678	168.865	129.425
1994-12-01	136.64	168.892	129.438
1995-01-01	136.614	168.897	129.441
1995-02-01	136.583	168.902	129.448
1995-03-01	136.545	168.906	129.461
1995-04-01	136.506	168.901	129.474
1995-05-01	136.381	167.407	129.505
1995-06-01	136.04	162.206	129.553
1995-07-01	135.796	160.941	129.61
1995-08-01	135.573	159.967	129.668
1995-09-01	135.443	160.055	129.722
1995-10-01	135.343	159.873	129.764
1995-11-01	135.27	159.719	129.79
1995-12-01	135.23	159.774	129.803
1996-01-01	135.206	159.806	129.804
1996-02-01	135.185	159.82	129.803
1996-03-01	135.166	159.825	129.799
1996-04-01	135.133	159.841	129.807
1996-05-01	134.944	157.892	129.835
1996-06-01	134.503	153.38	129.871
1996-07-01	134.137	151.122	129.904
1996-08-01	133.927	150.641	129.926
1996-09-01	133.852	150.884	129.94
1996-10-01	133.793	150.814	129.953
1996-11-01	133.757	150.875	129.963
1996-12-01	133.737	150.909	129.962
1997-01-01	133.721	150.913	129.956
1997-02-01	133.704	150.916	129.951
1997-03-01	133.68	150.926	129.951
1997-04-01	133.656	150.922	129.952
1997-05-01	133.529	149.806	129.957
1997-06-01	132.98	145.006	129.975
1997-07-01	132.57	143.177	129.994
1997-08-01	132.279	142.064	129.99
1997-09-01	132.211	142.317	129.977
1997-10-01	132.168	142.192	129.963
1997-11-01	132.141	142.196	129.955
1997-12-01	132.13	142.247	129.947
1998-01-01	132.119	142.254	129.937
1998-02-01	132.106	142.264	129.928
1998-03-01	132.093	142.278	129.921
1998-04-01	132.077	142.276	129.915
1998-05-01	131.903	140.975	129.913
1998-06-01	131.26	136.648	129.914
1998-07-01	130.76	134.853	129.913
1998-08-01	130.443	133.736	129.878
1998-09-01	130.455	134.296	129.83
1998-10-01	130.482	134.353	129.787
1998-11-01	130.495	134.396	129.762
1998-12-01	130.494	134.413	129.746
1999-01-01	130.485	134.407	129.733
1999-02-01	130.476	134.402	129.721
1999-03-01	130.469	134.398	129.708
1999-04-01	130.46	134.385	129.696
1999-05-01	130.225	132.84	129.686
1999-06-01	129.487	128.888	129.677
1999-07-01	128.925	127.144	129.658
1999-08-01	128.653	126.452	129.598
1999-09-01	128.673	126.758	129.521
1999-10-01	128.688	126.654	129.456
1999-11-01	128.701	126.627	129.411
1999-12-01	128.708	126.669	129.388
2000-01-01	128.711	126.687	129.367
2000-02-01	128.712	126.694	129.347
2000-03-01	128.712	126.695	129.328
2000-04-01	128.718	126.688	129.305
2000-05-01	128.458	125.192	129.283
2000-06-01	127.574	121.271	129.261
2000-07-01	126.926	119.644	129.224
2000-08-01	126.655	119.015	129.13
2000-09-01	126.707	119.261	129.017
2000-10-01	126.756	119.189	128.925
2000-11-01	126.816	119.31	128.866
2000-12-01	126.832	119.324	128.835
2001-01-01	126.836	119.323	128.813
2001-02-01	126.838	119.319	128.791
2001-03-01	126.841	119.314	128.769
2001-04-01	126.856	119.304	128.739
2001-05-01	126.575	117.884	128.704
2001-06-01	125.606	114.248	128.668
2001-07-01	125.211	113.804	128.612
2001-08-01	125.03	113.152	128.493
2001-09-01	125.061	113.203	128.379
2001-10-01	125.086	113.047	128.283
2001-11-01	125.086	112.93	128.222
2001-12-01	125.107	112.984	128.184
2002-01-01	125.114	113.001	128.159
2002-02-01	125.119	113.01	128.134
2002-03-01	125.136	113.022	128.102
2002-04-01	125.15	113.02	128.072
2002-05-01	124.845	111.618	128.029
2002-06-01	123.988	108.681	127.983
2002-07-01	123.62	108.193	127.913
2002-08-01	123.492	107.742	127.787
2002-09-01	123.608	108.009	127.664
2002-10-01	123.69	107.989	127.566
2002-11-01	123.728	107.982	127.509
2002-12-01	123.747	107.994	127.474
2003-01-01	123.747	107.99	127.453
2003-02-01	123.746	107.984	127.433
2003-03-01	123.751	107.98	127.409
2003-04-01	123.774	107.976	127.371
2003-05-01	123.484	106.687	127.325
2003-06-01	122.468	103.376	127.279
2003-07-01	121.739	101.993	127.208
2003-08-01	121.405	101.242	127.064
2003-09-01	121.497	101.469	126.899
2003-10-01	121.592	101.393	126.754
2003-11-01	121.682	101.504	126.67
2003-12-01	121.72	101.524	126.62
2004-01-01	121.731	101.524	126.591
2004-02-01	121.744	101.522	126.56
2004-03-01	121.761	101.519	126.527
2004-04-01	121.791	101.51	126.484
2004-05-01	121.477	100.244	126.428
2004-06-01	120.445	97.2254	126.369
2004-07-01	119.963	96.6053	126.284
2004-08-01	119.727	95.9281	126.121
2004-09-01	119.785	95.9663	125.959
2004-10-01	119.836	95.8282	125.827
2004-11-01	119.917	95.8692	125.728
2004-12-01	119.951	95.8995	125.681
2005-01-01	119.969	95.9076	125.647
2005-02-01	119.993	95.9141	125.607
2005-03-01	120.034	95.9191	125.557
2005-04-01	120.068	95.9103	125.511
2005-05-01	119.785	94.8425	125.459
2005-06-01	118.523	91.3452	125.399
2005-07-01	117.734	90.1844	125.316
2005-08-01	117.228	89.0948	125.133
2005-09-01	117.348	89.3685	124.92
2005-10-01	117.532	89.4281	124.731
2005-11-01	117.653	89.5087	124.625
2005-12-01	117.692	89.5179	124.574
2006-01-01	117.714	89.5172	124.536
2006-02-01	117.723	89.5113	124.509
2006-03-01	117.75	89.5081	124.467
2006-04-01	117.81	89.5008	124.403
2006-05-01	117.482	88.2987	124.324
2006-06-01	116.2	85.1632	124.251
2006-07-01	115.551	84.4255	124.145
2006-08-01	115.27	83.7716	123.937
2006-09-01	115.403	83.8669	123.719
2006-10-01	115.63	83.9957	123.528
2006-11-01	115.785	84.0509	123.398
2006-12-01	115.845	84.0524	123.332
2007-01-01	115.859	84.0448	123.299
2007-02-01	115.876	84.0366	123.265
2007-03-01	115.898	84.0283	123.227
2007-04-01	115.936	84.0162	123.176
2007-05-01	115.701	83.2166	123.112
2007-06-01	114.475	80.2698	123.03
2007-07-01	113.579	79.0024	122.922
2007-08-01	113.12	78.1848	122.715
2007-09-01	113.257	78.3889	122.481
2007-10-01	113.472	78.4316	122.262
2007-11-01	113.645	78.5179	122.116
2007-12-01	113.702	78.5237	122.05
2008-01-01	113.729	78.5193	122.008
2008-02-01	113.763	78.5144	121.96
2008-03-01	113.801	78.508	121.91
2008-04-01	113.852	78.4974	121.85
2008-05-01	113.514	77.4775	121.772
2008-06-01	111.986	74.3556	121.691
2008-07-01	111.279	73.7636	121.566
2008-08-01	111.02	73.1743	121.316
2008-09-01	111.269	73.4509	121.067
2008-10-01	111.498	73.4587	120.849
2008-11-01	111.628	73.469	120.721
2008-12-01	111.689	73.4781	120.653
2009-01-01	111.707	73.4732	120.617
2009-02-01	111.723	73.4668	120.584
2009-03-01	111.744	73.4603	120.545
2009-04-01	111.783	73.4521	120.494
2009-05-01	111.38	72.3658	120.415
2009-06-01	110.191	70.0651	120.319
2009-07-01	109.342	69.0178	120.186
2009-08-01	109.016	68.5269	119.96
2009-09-01	109.223	68.7049	119.702
2009-10-01	109.449	68.724	119.478
2009-11-01	109.602	68.7804	119.344
2009-12-01	109.67	68.7863	119.27
2010-01-01	109.69	68.7805	119.232
2010-02-01	109.716	68.7742	119.191
2010-03-01	109.759	68.7684	119.136
2010-04-01	109.809	68.7575	119.077
2010-05-01	109.614	68.1851	118.998
2010-06-01	108.032	65.2521	118.892
2010-07-01	106.972	64.2004	118.754
2010-08-01	106.642	63.708	118.486
2010-09-01	106.884	63.8847	118.191
2010-10-01	107.117	63.853	117.937
2010-11-01	107.28	63.9207	117.793
2010-12-01	107.367	63.9323	117.705
2011-01-01	107.397	63.9281	117.66
2011-02-01	107.454	63.9253	117.594
2011-03-01	107.51	63.9195	117.53
2011-04-01	107.569	63.9098	117.464
2011-05-01	107.253	63.1507	117.385
2011-06-01	105.863	60.783	117.273
2011-07-01	104.914	59.8314	117.132
2011-08-01	104.527	59.2722	116.873
2011-09-01	104.768	59.4605	116.58
2011-10-01	105.063	59.5333	116.323
2011-11-01	105.279	59.5799	116.145
2011-12-01	105.363	59.5796	116.057
2012-01-01	105.389	59.5717	116.014
2012-02-01	105.411	59.5631	115.974
2012-03-01	105.466	59.5554	115.91
2012-04-01	105.539	59.5438	115.832
2012-05-01	105.177	58.7238	115.746
2012-06-01	103.582	56.2298	115.639
2012-07-01	102.505	55.2511	115.491
2012-08-01	102.203	54.8027	115.21
2012-09-01	102.42	54.8975	114.9
2012-10-01	102.681	54.9087	114.633
2012-11-01	102.892	54.9792	114.459
2012-12-01	103.001	54.9882	114.353
2013-01-01	103.031	54.982	114.307
2013-02-01	103.064	54.975	114.259
2013-03-01	103.139	54.9693	114.18
2013-04-01	103.208	54.9574	114.106
2013-05-01	102.854	54.1357	114.014
2013-06-01	101.151	51.4375	113.891
2013-07-01	100.012	50.4063	113.734
2013-08-01	99.625	49.8028	113.437
2013-09-01	99.8961	49.9814	113.097
2013-10-01	100.205	50.0492	112.817
2013-11-01	100.466	50.1135	112.606
2013-12-01	100.559	50.1143	112.51
2014-01-01	100.608	50.1081	112.449
2014-02-01	100.652	50.1004	112.393
2014-03-01	100.705	50.0921	112.33
2014-04-01	100.814	50.0793	112.228
2014-05-01	100.412	49.1586	112.135
2014-06-01	98.4649	46.117	112.026
2014-07-01	97.117	44.9087	111.859
2014-08-01	96.9907	44.7467	111.522
2014-09-01	97.26	44.737	111.148
2014-10-01	97.4803	44.6604	110.863
2014-11-01	97.7379	44.7356	110.642
2014-12-01	97.8257	44.7477	110.55
