# Supplementary material for: Radiocarbon analysis reveals underestimation of soil organic carbon persistence in new-generation soil models
Source: Copernicus journal article supplement (doi:10.5194/gmd-2023-242), 2024-01-19
Supplement: Supplementary file 3 [file error.xlsx]

## Sheet: MIMICS
entry_name	site_name	pro_name	date	soc_kgCm2	bulk_14c	HF_14c	LF_14c	HF_c_perc	LF_c_perc
Baisden_2002	China Hat	ChinaHat.1978	1978-07-01	-1.76754	-127.633	-154.077	-96.6604	5.81469	-19.9311
	Riverbank	Riverbank.1949	1949-07-01	-0.46569	24.0883	18.4922	30.0013	-12.9326	-2.12058
		Riverbank.1997	1997-07-01	-0.630259	42.6034	19.252	83.6956	-25.2275	7.46066
Berhe_2012	Tennessee Valley	hollow comp	2004-07-01	-1.41266	71.3731	28.6354	136.812	-22.4787	12.6229
		plain comp	2004-07-01	-2.2128	-58.0332	-97.6056	81.6319	-13.2106	5.42119
		slope comp	2004-07-01	-1.1443	68.4031	20.7943	174.778	-24.0015	13.9189
		summit comp	2004-07-01	-1.85985	24.7656	-18.7764	113.932	-21.219	11.7883
Harden_2002	Dinesen	DPPR2	1998-05-08	-0.424488	-97.5569	-147.42	86.6954	-13.3506	4.41924
Heckman_2010	Chiricahua Rhyolite	CHRY_composite	2006-07-01	-5.02341	17.3729	-28.6308	140.098	11.3177	-26.0712
	Flagstaff Basalt	FGBA_composite	2006-07-01	-3.92937	19.85	-64.8241	93.3768	15.5957	-30.8927
	Mt. Lemmon Granite	MLGR_composite	2006-07-01	-2.23157	66.9277	-18.0851	88.5113	14.8559	-29.0445
Heckman_2018	AZ_Mollisol	Basalt	2008-07-01		-13.5832	-94.3523	81.6605	29.8734	-43.6214
	HI_Andisol	WPL1204	2012-07-01		-62.9669	-52.3476	55.6506	41.1134	-49.7186
Lemke_2006	Solling	Solling_DO_F1	2004-07-29		10.9715	-38.8473	114.047	26.8631	1.46717
		Solling_DO_F2	2004-07-29		90.0564	33.761	211.34	32.6569	9.95763
		Solling_DO_F3	2004-07-29		67.4632	14.0584	170.218	-1.87992	5.38777
Lybrand_2017	Catalina CZO conifer	mixed conifer_convergent	2015-07-01		44.6487	-13.8392	106.033	-23.4078	8.97697
		mixed conifer_divergent	2015-07-01		-10.3513	-44.0421	23.4027	-5.40783	-9.02303
	Catalina CZO desert	desert scrub_convergent	2015-07-01		-76.2004	-72.436	13.4753	-2.31816	-8.219
		desert scrub_divergent	2015-07-01		-20.2004	-31.8241	40.5896	-1.31816	-9.219
	Catalina CZO ponderosa	ponderosa pine_convergent	2015-07-01		-40.3564	-93.179	42.0345	18.3095	-32.1656
		ponderosa pine_divergent	2015-07-01		-6.35644	-31.2747	63.4293	-7.69048	-6.1656
Marin-Spiotta_2008	Sierra de Cayey	10yr secondary forest	2001-07-01		-85.6266	-131.245	84.7538	-0.60295	0.198001
		20yr secondary forest	2001-07-01		-99.8309	-151.532	84.3853	-11.486	9.53584
		30yr secondary forest	2001-07-01		-121.339	-170.312	56.5504	-7.70277	6.07943
		80yr secondary forest	2001-07-01		-117.621	-165.282	84.7626	-0.984875	4.5853
		Active pastures	2001-07-01		-115.593	-140.092	95.0916	5.2365	3.98241
		Primary forest	2001-07-01		-145.573	-183.783	52.0309	2.07357	-0.00711906
McFarlane_2013	MA Harvard Forest	H1	2007-11-01	-1.28883	68.291	11.3899	115.575	-26.2136	10.3195
		H2	2007-11-01	-1.4912	106.779	32.3378	124.913	-33.6679	17.8007
		H3	2007-11-01	-1.33393	43.6263	-19.7381	77.3983	-9.96036	-6.69892
		H4	2007-11-01	-1.03247	45.588	-24.5192	79.6092	20.0236	-36.6829
		H5	2007-11-01	-0.448326	74.9463	26.8945	86.6777	-33.184	16.5982
	MI-Coarse UMBS	60M	2007-11-01	-0.392884	40.5116	-20.6539	51.1989	-6.24249	-7.24387
		C7	2007-11-01	-0.138482	53.9897	3.08493	66.5905	-18.5627	4.45678
		D4	2007-11-01	-0.215204	68.9228	0.46254	90.0784	-21.661	7.2928
		G3	2007-11-01	-0.306267	61.894	2.76559	110.676	-25.8386	11.6098
		O2	2007-11-01	-0.150616	36.6425	-14.3592	54.723	-22.333	7.48839
	MO Ozark BREA	M1	2007-12-01	-0.954387	-15.9876	-71.0856	59.0122	-9.17042	-4.87535
		M2	2007-12-01	-0.646584	-25.339	-54.9327	46.1754	-9.11118	-4.72695
		M3	2007-12-01	-0.527932	-16.5453	-48.1837	56.7929	-15.3546	1.29286
		M4	2007-12-01	-0.583644	-12.6889	-59.8061	38.178	-9.33784	-4.63937
		M5	2007-12-01	-0.506227	-20.9997	-52.6932	45.224	-4.33652	-9.39249
	Mi-Fine Colonial Point	C1	2008-11-01	-2.02303	20.4079	-57.8186	72.6446	-56.0064	37.8032
		C2	2008-11-01	-3.0394	40.805	-43.8175	76.835	-41.946	23.6919
		C3	2008-11-01	-2.60068	29.8097	-50.3236	49.5837	-30.0223	11.8987
		C4	2008-11-01	-3.98794	22.5513	-69.3602	56.9018	-8.38114	-9.87599
		C5	2008-11-01	-2.68281	34.8055	-32.8986	55.8114	-32.7212	14.6566
	NH Bartlett Forest	B1	2007-11-01	-0.816653	70.4794	-9.24365	111.86	-40.8497	24.1287
		B2	2007-11-01	-0.557546	89.2501	24.9485	121.319	-28.5187	11.8642
		B3	2007-11-01	0.00215784	135.371	39.7228	177.422	-21.0963	4.54716
		B4	2007-11-01	-1.23802	86.1109	18.82	91.9998	-19.37	2.85486
		B5	2007-11-01	-0.794753	108.339	30.6522	126.222	8.51849	-25.0786
Meyer_2012	Matsch	Abandoned	2008-10-01	-1.4611	-10.4673	-33.7314	70.5665	3.23995	-13.1004
		Meadow	2008-10-01	-1.3211	-18.4113	-48.6265	86.7878	-0.669288	-8.95968
		Pasture	2008-10-01	-1.6631	-8.48125	-38.6964	85.7967	6.05659	-15.917
	Stubai	Abandoned	2008-10-01	-2.50951	9.88078	-18.0709	98.8522	20.4838	-31.8686
		Meadow	2008-10-01	-1.17051	16.8318	-20.0569	105.819	-12.288	0.0336341
		Pasture	2008-10-01	-1.67951	23.7829	-11.1198	117.511	-12.7689	1.63662
Rasmussen_2018	ANpp	ANpp	2009-07-01	-7.25806	-133.618	-114.439	-129.983	-28.254	9.46757
	ANwf	ANwf	2009-07-01	-4.544	-14.9503	2.23613	-22.4427	-55.199	42.4576
	BSpp	BSpp	2009-07-01	-3.76732	23.9296	-29.4538	34.7511	-9.55531	-10.7578
	BSrf	BSrf	2009-07-01	-5.51585	6.53605	56.2913	-41.6314	-1.18422	-13.3867
	BSwf	BSwf	2009-07-01	-2.96785	-69.7058	-23.8329	-38.3124	-7.78289	-8.22701
	GRpp	GRpp	2010-07-01	-4.7871	-225.646	-31.4053	-216.388	-28.6312	11.1054
	GRwf	GRwf	2010-07-01	-2.89563	-228.04	31.438	-180.717	-23.5062	10.4035
Schrumpf_2013	Bugac	Bugac.1	2004-07-01	-2.15886	-76.4567	-107.229	37.5227	9.70881	-18.8938
	Carlow	Carlow.1	2004-07-01	-0.818184	105.235	41.5295	342.113	-37.1209	22.4983
	Easter Bush	Easter Bush.1	2004-07-01	-1.45838	71.1012	5.2327	181.914	-13.7586	-0.948104
	Gebesee	Gebesee.1	2004-07-01	0.712356	75.3909	75.0405	177.221	9.49604	-16.5596
	Grignon	Grignon.1	2004-07-01	0.194054	199.063	78.2491	630.011	6.48892	-13.6395
	Hainich	Hainich.1	2004-07-01	1.00311	-171.789	-212.376	68.244	-1.46296	-4.7055
	Hesse	Hesse.1	2004-07-01	0.134675	-72.0195	-120.914	42.3903	-0.45596	-10.2266
	Laqueuille	Laqueuille.1	2004-07-01	-1.52124	-46.7292	-78.963	86.7378	7.33334	-15.9136
	Norunda	Norunda.1	2004-07-01	0.397537	2.97152	-89.8378	8.00619	-45.2839	28.9847
	Sorø	Sorø.1	2004-07-01	-1.15471	-37.7592	-105.25	65.5748	-10.9886	-1.82341
	Wetzstein	Wetzstein.1	2004-07-01	0.375276	96.1331	36.7475	202.459	-6.98813	-5.13501

## Sheet: Millennial
entry_name	site_name	pro_name	date	soc_kgCm2	bulk_14c	HF_14c	LF_14c	HF_c_perc	LF_c_perc
Baisden_2002	China Hat	ChinaHat.1978	1978-07-01	1.06017	-38.5203	39.4847	-96.0433	34.2596	-34.4365
	Riverbank	Riverbank.1949	1949-07-01	2.09508	39.0378	47.2878	27.1429	23.523	-23.6567
		Riverbank.1997	1997-07-01	2.35621	60.6923	84.4785	54.7822	29.5273	-29.7227
Berhe_2012	Tennessee Valley	hollow comp	2004-07-01	1.97003	199.413	205.545	134.024	1.1415	-1.28168
		plain comp	2004-07-01	1.07738	111.459	114.682	78.1819	1.54069	-1.67584
		slope comp	2004-07-01	2.68639	187.138	188.812	168.162	0.764934	-0.89312
		summit comp	2004-07-01	1.64336	160.055	164.326	110.089	0.389714	-0.525051
Harden_2002	Dinesen	DPPR2	1998-05-08	3.32726	96.7094	98.6653	78.187	0.755982	-0.861642
Heckman_2010	Chiricahua Rhyolite	CHRY_composite	2006-07-01	0.0912608	5.16446	33.8629	69.5924	64.1011	-64.1705
	Flagstaff Basalt	FGBA_composite	2006-07-01	-0.306706	65.5664	57.0195	63.9802	61.673	-61.7916
	Mt. Lemmon Granite	MLGR_composite	2006-07-01	6.00727	11.5889	-7.66364	-12.4819	70.8404	-70.8811
Heckman_2018	AZ_Mollisol	Basalt	2008-07-01		65.0547	56.2249	57.2037	65.8666	-65.979
	HI_Andisol	WPL1204	2012-07-01		70.6821	129.095	54.1488	62.2031	-62.3134
Lemke_2006	Solling	Solling_DO_F1	2004-07-29		129.067	150.031	95.3289	57.6485	-17.0434
		Solling_DO_F2	2004-07-29		208.151	222.639	192.622	63.4423	-8.55291
		Solling_DO_F3	2004-07-29		185.558	202.936	151.5	28.9055	-13.1228
Lybrand_2017	Catalina CZO conifer	mixed conifer_convergent	2015-07-01		10.5278	3.68966	21.2614	25.0474	-25.0605
		mixed conifer_divergent	2015-07-01		-43.8376	-25.877	-60.7508	43.0459	-43.0592
	Catalina CZO desert	desert scrub_convergent	2015-07-01		-81.06	-41.5078	-86.8358	21.0926	-21.1005
		desert scrub_divergent	2015-07-01		-25.06	-0.895956	-59.7215	22.0926	-22.1005
	Catalina CZO ponderosa	ponderosa pine_convergent	2015-07-01		-72.5574	-70.2376	-54.352	61.0695	-61.0798
		ponderosa pine_divergent	2015-07-01		-37.9913	-7.76611	-32.4018	35.0682	-35.0786
Marin-Spiotta_2008	Sierra de Cayey	10yr secondary forest	2001-07-01		49.5682	48.0809	56.0124	14.0848	-7.63687
		20yr secondary forest	2001-07-01		21.2896	17.7347	56.7683	6.68561	-0.939206
		30yr secondary forest	2001-07-01		8.51455	5.69417	29.9749	8.68558	-3.04006
		80yr secondary forest	2001-07-01		24.479	19.9766	58.7324	12.8855	-2.64024
		Active pastures	2001-07-01		51.3551	51.1798	57.2111	9.22115	4.02637
		Primary forest	2001-07-01		21.2907	20.4518	26.221	11.4856	-3.93988
McFarlane_2013	MA Harvard Forest	H1	2007-11-01	2.65425	101.55	127.631	113.73	39.9804	-40.1823
		H2	2007-11-01	2.6105	139.232	147.615	122.621	32.67	-32.8637
		H3	2007-11-01	2.24165	95.0077	120.979	76.9996	48.5662	-48.7805
		H4	2007-11-01	2.70967	96.749	116.003	78.9083	78.4925	-78.6985
		H5	2007-11-01	2.37001	134.999	177.126	87.1495	22.0412	-22.3021
	MI-Coarse UMBS	60M	2007-11-01	3.01951	59.7052	61.3366	54.0944	68.6879	-68.8738
		C7	2007-11-01	4.21833	61.9258	74.6333	58.8763	56.3945	-56.5424
		D4	2007-11-01	2.60464	96.3404	92.2109	99.7658	52.8416	-53.0656
		G3	2007-11-01	2.10777	93.3462	98.3071	123.81	48.588	-48.8461
		O2	2007-11-01	3.15265	58.9085	73.4445	59.4056	51.989	-52.1815
	MO Ozark BREA	M1	2007-12-01	4.42154	42.8553	45.7565	46.5545	35.3622	-35.4294
		M2	2007-12-01	5.55875	36.4461	66.3379	32.1279	33.6147	-33.6688
		M3	2007-12-01	5.37429	40.2225	66.3566	43.5202	29.3794	-29.4381
		M4	2007-12-01	5.12328	47.0882	58.521	25.1817	34.57	-34.6313
		M5	2007-12-01	5.25379	45.1852	73.666	32.2095	37.4862	-37.5463
	Mi-Fine Colonial Point	C1	2008-11-01	3.35902	38.0147	44.9549	54.0558	7.71374	-7.83204
		C2	2008-11-01	1.96436	65.7474	67.7008	61.9303	20.0876	-20.2128
		C3	2008-11-01	2.4699	47.91	51.6778	33.8559	34.9241	-35.0485
		C4	2008-11-01	1.13348	46.8526	41.7031	40.8801	53.4049	-53.5277
		C5	2008-11-01	2.5537	49.9223	65.341	38.5353	32.9137	-33.0351
	NH Bartlett Forest	B1	2007-11-01	4.96478	103.105	113.116	105.965	23.9493	-24.0955
		B2	2007-11-01	6.29631	114.783	139.677	110.2	37.0446	-37.1674
		B3	2007-11-01	6.49099	161.253	154.103	168.071	45.2168	-45.3472
		B4	2007-11-01	5.08925	112.369	133.367	83.3879	47.1457	-47.2796
		B5	2007-11-01	5.31435	136.458	147.359	118.734	74.7019	-74.8408
Meyer_2012	Matsch	Abandoned	2008-10-01	3.88844	110.124	124.45	63.3115	22.4204	-22.5982
		Meadow	2008-10-01	4.02844	102.18	109.555	79.5328	18.5112	-18.4575
		Pasture	2008-10-01	3.99459	111.492	118.846	78.1606	25.2791	-25.4506
	Stubai	Abandoned	2008-10-01	2.45463	118.373	133.801	89.6265	45.3918	-45.5805
		Meadow	2008-10-01	4.24935	123.982	130.43	95.7585	12.6924	-13.7407
		Pasture	2008-10-01	3.54307	131.547	139.999	107.849	12.1811	-12.1114
Rasmussen_2018	ANpp	ANpp	2009-07-01	-4.86621	-138.918	-93.2193	-131.817	52.2533	-52.3048
	ANwf	ANwf	2009-07-01	-3.29775	-2.47469	11.1498	-3.10658	31.3726	-31.458
	BSpp	BSpp	2009-07-01	-1.46682	20.592	68.0586	-9.98627	55.0086	-55.1199
	BSrf	BSrf	2009-07-01	-4.02016	8.72727	26.6564	-26.086	86.1454	-86.2319
	BSwf	BSwf	2009-07-01	-1.28225	-75.2762	-51.3348	-30.0736	79.1169	-79.1954
	GRpp	GRpp	2010-07-01	-4.08472	-273.602	-222.183	-249.071	61.039	-61.0706
	GRwf	GRwf	2010-07-01	-2.63266	-109.05	-40.3009	-48.3646	66.5668	-66.6414
Schrumpf_2013	Bugac	Bugac.1	2004-07-01	1.20348	44.0352	56.3228	4.83556	29.293	-29.6015
	Carlow	Carlow.1	2004-07-01	3.08556	203.285	196.175	341.07	-2.92122	2.6856
	Easter Bush	Easter Bush.1	2004-07-01	4.1618	172.781	169.662	176.548	18.7067	-18.93
	Gebesee	Gebesee.1	2004-07-01	5.02475	268.298	304.759	156.134	18.2815	-18.5564
	Grignon	Grignon.1	2004-07-01	4.07259	374.495	290.773	611.81	16.8075	-17.0851
	Hainich	Hainich.1	2004-07-01	4.11668	86.5545	91.0867	52.8923	5.42729	-5.67453
	Hesse	Hesse.1	2004-07-01	6.13706	69.7516	84.2064	30.9004	23.1749	-23.393
	Laqueuille	Laqueuille.1	2004-07-01	3.78984	100.873	108.08	76.9119	22.8134	-23.0538
	Norunda	Norunda.1	2004-07-01	6.45596	45.9436	51.4125	38.7839	35.5591	-35.7903
	Sorø	Sorø.1	2004-07-01	4.52983	69.6889	74.055	51.0176	21.1958	-21.4423
	Wetzstein	Wetzstein.1	2004-07-01	5.11822	225.031	236.419	190.446	21.4882	-21.7306

## Sheet: SOMic
entry_name	site_name	pro_name	date	soc_kgCm2	bulk_14c	HF_14c	LF_14c	HF_c_perc	LF_c_perc
Baisden_2002	China Hat	ChinaHat.1978	1978-07-01	0.514341	-61.7508	-34.3964	134.423	25.8462	-28.9961
	Riverbank	Riverbank.1949	1949-07-01	1.37117	34.5675	42.0002	28.4018	18.6564	-21.1409
		Riverbank.1997	1997-07-01	1.34719	29.9801	53.7423	31.0143	15.9637	-20.0269
Berhe_2012	Tennessee Valley	hollow comp	2004-07-01	1.13736	163.854	175.985	68.5545	-7.43	4.34431
		plain comp	2004-07-01	0.449749	74.6798	82.6146	14.3583	-5.38217	2.56626
		slope comp	2004-07-01	1.38468	156.486	164.405	106.423	-8.03616	4.91501
		summit comp	2004-07-01	0.724702	125.391	135.382	45.8595	-7.80527	4.78168
Harden_2002	Dinesen	DPPR2	1998-05-08	3.60881	64.1796	74.0644	11.0653	-9.45773	6.09559
Heckman_2010	Chiricahua Rhyolite	CHRY_composite	2006-07-01	-2.71023	5.91369	32.8927	78.9093	53.3666	-55.9353
	Flagstaff Basalt	FGBA_composite	2006-07-01	-1.752	41.4073	31.9693	44.9982	48.4571	-51.6221
	Mt. Lemmon Granite	MLGR_composite	2006-07-01	-0.217607	49.6247	32.514	17.1255	58.9978	-61.6695
Heckman_2018	AZ_Mollisol	Basalt	2008-07-01		35.5754	26.7417	29.1217	55.8227	-58.5503
	HI_Andisol	WPL1204	2012-07-01		42.6573	109.097	-27.2401	55.9571	-58.0497
Lemke_2006	Solling	Solling_DO_F1	2004-07-29		95.6554	127.655	40.2481	37.2053	-1.12846
		Solling_DO_F2	2004-07-29		174.74	200.264	137.541	42.9991	7.362
		Solling_DO_F3	2004-07-29		152.147	180.561	96.4193	8.46227	2.79214
Lybrand_2017	Catalina CZO conifer	mixed conifer_convergent	2015-07-01		52.1842	53.8782	24.7152	15.058	-17.4426
		mixed conifer_divergent	2015-07-01		-2.81578	23.6752	-57.9151	33.058	-35.4426
	Catalina CZO desert	desert scrub_convergent	2015-07-01		-20.0883	25.1349	-57.3537	13.9751	-16.0404
		desert scrub_divergent	2015-07-01		35.9117	65.7467	-30.2395	14.9751	-17.0404
	Catalina CZO ponderosa	ponderosa pine_convergent	2015-07-01		-20.2769	-10.3966	-39.0438	52.2804	-54.5364
		ponderosa pine_divergent	2015-07-01		13.7231	51.5077	-17.649	26.2804	-28.5364
Marin-Spiotta_2008	Sierra de Cayey	10yr secondary forest	2001-07-01		43.8337	45.5297	34.9627	4.77605	-0.56288
		20yr secondary forest	2001-07-01		15.2266	15.2998	34.2296	-3.38985	6.82017
		30yr secondary forest	2001-07-01		0.845706	1.41173	6.57053	-0.998322	4.37085
		80yr secondary forest	2001-07-01		15.5393	14.0909	35.0711	3.75716	4.27578
		Active pastures	2001-07-01		43.9149	45.3126	39.2767	4.18004	6.86727
		Primary forest	2001-07-01		10.8631	12.4903	3.02481	3.36662	2.07785
McFarlane_2013	MA Harvard Forest	H1	2007-11-01	3.22216	60.965	76.2706	97.4565	13.1358	-18.4417
		H2	2007-11-01	3.01292	99.2677	96.8825	106.78	5.73049	-11.0437
		H3	2007-11-01	3.60684	51.0127	66.4984	60.2434	24.9714	-29.844
		H4	2007-11-01	3.91347	53.1964	61.9838	62.467	54.8852	-59.7528
		H5	2007-11-01	4.63264	88.8676	120.545	69.8868	-0.324999	-4.41294
	MI-Coarse UMBS	60M	2007-11-01	2.17195	22.2048	11.184	46.2642	44.3503	-49.1483
		C7	2007-11-01	2.44007	35.9835	36.1537	61.8128	32.074	-36.8473
		D4	2007-11-01	2.37275	51.1078	34.2981	85.3761	28.9749	-33.7326
		G3	2007-11-01	2.27642	43.9724	36.1752	105.933	24.7993	-29.5657
		O2	2007-11-01	2.45993	19.2829	21.2486	50.1726	28.2663	-32.9879
	MO Ozark BREA	M1	2007-12-01	2.59465	27.4078	50.1289	-26.9682	18.7431	-22.0684
		M2	2007-12-01	2.95663	23.9194	73.2399	-39.7842	17.3981	-20.6724
		M3	2007-12-01	3.01632	26.3602	72.433	-29.1888	12.6767	-16.0065
		M4	2007-12-01	2.9848	32.7374	63.8587	-47.7959	18.0881	-21.3952
		M5	2007-12-01	3.12105	31.0701	78.6964	-40.7232	21.5039	-24.7553
	Mi-Fine Colonial Point	C1	2008-11-01	1.12139	19.924	16.5144	67.1333	-11.0054	6.93107
		C2	2008-11-01	0.163907	43.4002	35.0548	71.6246	1.92339	-5.92898
		C3	2008-11-01	0.496049	27.0601	20.406	43.8378	15.8114	-19.9422
		C4	2008-11-01	-0.775693	25.6439	10.2125	51.7383	35.3059	-39.3011
		C5	2008-11-01	0.387423	30.8775	35.8512	49.9381	13.544	-17.7065
	NH Bartlett Forest	B1	2007-11-01	3.81258	70.2975	69.3072	98.914	-1.18004	-3.91558
		B2	2007-11-01	4.0368	87.9409	101.851	108.278	11.5056	-16.6371
		B3	2007-11-01	4.54972	132.617	114.425	164.255	19.3748	-24.5547
		B4	2007-11-01	3.29605	82.9535	92.8888	78.7972	21.2239	-26.418
		B5	2007-11-01	3.75733	105.722	105.567	113.067	48.9479	-54.1231
Meyer_2012	Matsch	Abandoned	2008-10-01	5.07489	54.8521	63.2316	32.6088	4.96703	-10.1408
		Meadow	2008-10-01	5.21489	46.908	48.3365	48.83	1.05779	-6.00013
		Pasture	2008-10-01	4.87289	56.8381	58.2665	47.8389	7.78367	-12.9575
	Stubai	Abandoned	2008-10-01	1.75068	75.5117	93.0561	45.4656	28.2639	-33.3078
		Meadow	2008-10-01	3.08968	82.4628	91.0701	52.432	-4.50787	-1.40561
		Pasture	2008-10-01	2.58068	89.4138	100.007	64.1242	-4.98877	0.197378
Rasmussen_2018	ANpp	ANpp	2009-07-01	-5.64264	-135.52	-100.984	19.5757	53.2481	-54.2955
	ANwf	ANwf	2009-07-01	-3.50363	-10.2479	-10.4191	120.584	29.8493	-31.2787
	BSpp	BSpp	2009-07-01	-1.81958	-16.5887	25.2037	-9.16347	49.5184	-51.5369
	BSrf	BSrf	2009-07-01	-4.42933	-3.1229	-4.11363	95.7582	81.7492	-83.5728
	BSwf	BSwf	2009-07-01	-1.79066	-82.0683	-76.4287	100.234	75.3291	-77.0676
	GRpp	GRpp	2010-07-01	-3.60304	-319.902	-289.495	85.893	64.2587	-64.8009
	GRwf	GRwf	2010-07-01	-1.87615	-312.446	-266.552	124.111	69.3107	-70.0173
Schrumpf_2013	Bugac	Bugac.1	2004-07-01	1.81674	25.3189	54.0908	-60.4154	15.3399	-19.9139
	Carlow	Carlow.1	2004-07-01	1.88532	171.2	169.447	291.31	-13.5727	8.51452
	Easter Bush	Easter Bush.1	2004-07-01	2.14594	146.099	145.583	145.361	3.78435	-8.54991
	Gebesee	Gebesee.1	2004-07-01	5.03282	237.309	282.402	94.3082	8.27648	-13.1855
	Grignon	Grignon.1	2004-07-01	4.14137	344.758	267.468	561.22	6.78375	-11.6361
	Hainich	Hainich.1	2004-07-01	4.88417	47.482	58.3939	-2.15974	-8.6068	4.83441
	Hesse	Hesse.1	2004-07-01	5.65884	34.0872	51.0992	-5.80059	3.80095	-8.2612
	Laqueuille	Laqueuille.1	2004-07-01	2.94778	66.1517	78.3651	32.3728	6.39848	-11.4232
	Norunda	Norunda.1	2004-07-01	5.11742	19.8129	9.49128	47.5827	11.7715	-17.1413
	Sorø	Sorø.1	2004-07-01	4.78471	32.1896	38.7228	15.8418	0.686033	-5.30107
	Wetzstein	Wetzstein.1	2004-07-01	4.75545	187.037	203.246	146.979	0.605608	-5.43208

## Sheet: CORPSE
entry_name	site_name	pro_name	date	soc_kgCm2	bulk_14c	HF_14c	LF_14c	HF_c_perc	LF_c_perc
Baisden_2002	China Hat	ChinaHat.1978	1978-07-01	-0.99006	85.3379	2.23768	120.863	-15.3371	14.6596
	Riverbank	Riverbank.1949	1949-07-01	2.46524	-330.371	-355.697	-56.3432	21.6044	-21.9126
		Riverbank.1997	1997-07-01	1.38333	-224.31	-364.783	43.6623	-0.0241411	-0.565426
Berhe_2012	Tennessee Valley	hollow comp	2004-07-01	0.916504	130.187	98.3054	118.555	-35.5498	35.138
		plain comp	2004-07-01	0.115867	39.0073	4.88267	64.9008	-31.9286	31.5558
		slope comp	2004-07-01	1.17256	123.257	86.9533	156.352	-36.4175	35.9999
		summit comp	2004-07-01	0.485189	91.0248	57.3743	95.9849	-35.5019	35.0998
Harden_2002	Dinesen	DPPR2	1998-05-08	5.14302	53.8134	8.89201	80.0969	-43.7266	43.4328
Heckman_2010	Chiricahua Rhyolite	CHRY_composite	2006-07-01	-1.55674	-8.45745	-50.0386	136.396	25.4368	-25.6466
	Flagstaff Basalt	FGBA_composite	2006-07-01	-1.89276	41.1192	-29.0991	102.958	19.3514	-19.7263
	Mt. Lemmon Granite	MLGR_composite	2006-07-01	-0.232356	53.9325	-31.0728	81.03	23.2989	-23.6043
Heckman_2018	AZ_Mollisol	Basalt	2008-07-01		27.1094	-36.9699	87.4238	28.3147	-28.5319
	HI_Andisol	WPL1204	2012-07-01		-25.977	18.6549	-8.89365	38.5977	-39.0593
Lemke_2006	Solling	Solling_DO_F1	2004-07-29		71.5482	-27.3876	98.9991	-5.44496	46.1384
		Solling_DO_F2	2004-07-29		150.633	45.2206	196.292	0.348798	54.6289
		Solling_DO_F3	2004-07-29		128.04	25.5181	155.17	-34.188	50.059
Lybrand_2017	Catalina CZO conifer	mixed conifer_convergent	2015-07-01		30.0149	-17.5554	88.6767	-12.3549	12.08
		mixed conifer_divergent	2015-07-01		-24.9851	-47.7583	6.04635	5.64506	-5.92002
	Catalina CZO desert	desert scrub_convergent	2015-07-01		-50.7335	-49.2273	3.74176	-8.86297	8.6272
		desert scrub_divergent	2015-07-01		5.26652	-8.61546	30.856	-7.86297	7.6272
	Catalina CZO ponderosa	ponderosa pine_convergent	2015-07-01		-48.3855	-86.6213	24.9659	27.3741	-27.623
		ponderosa pine_divergent	2015-07-01		-14.3855	-24.717	46.3607	1.37406	-1.623
Marin-Spiotta_2008	Sierra de Cayey	10yr secondary forest	2001-07-01		-29.4106	-66.0724	64.1846	-7.63891	13.7186
		20yr secondary forest	2001-07-01		-56.658	-96.3674	63.4313	-16.2895	21.6484
		30yr secondary forest	2001-07-01		-71.7763	-110.255	35.7816	-13.6342	18.904
		80yr secondary forest	2001-07-01		-57.9778	-97.4581	64.2989	-8.56091	18.4452
		Active pastures	2001-07-01		-38.1496	-69.4084	65.3859	-7.67201	20.5835
		Primary forest	2001-07-01		-63.8485	-98.5032	32.293	-8.51533	15.7238
McFarlane_2013	MA Harvard Forest	H1	2007-11-01	10.3912	51.3908	11.2652	100.983	-18.606	18.3419
		H2	2007-11-01	10.1394	90.025	32.1593	110.346	-26.1962	25.9309
		H3	2007-11-01	12.6603	27.8098	-9.13046	61.9149	-0.371947	0.156405
		H4	2007-11-01	12.9841	29.879	-13.7267	64.1205	29.5853	-29.8005
		H5	2007-11-01	14.1275	62.7773	42.8938	71.0859	-24.6256	24.4201
	MI-Coarse UMBS	60M	2007-11-01	2.54607	62.4839	-1.60312	65.0603	-15.1284	14.7078
		C7	2007-11-01	3.12123	69.1636	13.6845	80.1257	-20.2007	19.8202
		D4	2007-11-01	3.1759	81.4017	8.37338	103.488	-20.7367	20.3705
		G3	2007-11-01	3.01525	75.7904	12.0474	124.151	-26.2441	25.8705
		O2	2007-11-01	3.47473	44.5508	-10.2253	67.9212	-17.354	17.0112
	MO Ozark BREA	M1	2007-12-01	2.85866	1.24959	0.272394	16.8064	-9.59092	8.95327
		M2	2007-12-01	3.22317	-2.77145	22.7409	4.19732	-10.5475	9.92444
		M3	2007-12-01	3.27985	0.249626	22.6359	14.5673	-15.6941	15.0551
		M4	2007-12-01	3.25032	6.38711	13.766	-3.94699	-10.1011	9.4688
		M5	2007-12-01	3.38701	4.14608	27.9283	3.34972	-6.2839	5.66711
	Mi-Fine Colonial Point	C1	2008-11-01	3.5578	13.0437	-42.3332	84.2289	-38.1617	37.9291
		C2	2008-11-01	2.66972	34.9713	-24.8685	88.511	-24.635	24.4084
		C3	2008-11-01	2.87071	21.5454	-37.4737	61.1093	-11.8947	11.6569
		C4	2008-11-01	1.74007	16.9914	-49.8642	68.5936	8.83149	-9.05728
		C5	2008-11-01	2.72534	26.1715	-21.4473	67.3104	-14.4977	14.2569
	NH Bartlett Forest	B1	2007-11-01	9.1681	58.6168	4.05539	110.109	-27.0384	26.7225
		B2	2007-11-01	9.28532	77.3181	37.3501	119.563	-14.8476	14.5268
		B3	2007-11-01	9.64623	123.513	51.0168	175.666	-7.71331	7.38526
		B4	2007-11-01	8.34667	74.3114	29.8168	90.2455	-6.09349	5.76323
		B5	2007-11-01	8.86898	96.4653	42.0481	124.466	21.9347	-22.262
Meyer_2012	Matsch	Abandoned	2008-10-01	9.99238	44.035	-2.04656	66.8965	-19.1009	18.7941
		Meadow	2008-10-01	10.1324	36.091	-16.9417	83.1177	-23.0102	22.9348
		Pasture	2008-10-01	9.79038	46.0211	-7.0116	82.1266	-16.2843	15.9775
	Stubai	Abandoned	2008-10-01	4.30463	60.6078	22.4603	92.2307	2.06865	-2.47443
		Meadow	2008-10-01	5.64363	67.5589	20.4743	99.1971	-30.7031	29.4278
		Pasture	2008-10-01	5.13463	74.5099	29.4114	110.889	-31.184	31.0308
Rasmussen_2018	ANpp	ANpp	2009-07-01	-7.20762	-91.8603	-77.9276	-8.95416	31.3949	-31.716
	ANwf	ANwf	2009-07-01	-4.70564	53.7976	24.36	92.0367	-12.1929	11.6074
	BSpp	BSpp	2009-07-01	-3.43928	44.4278	93.9824	14.5671	9.2781	-9.73645
	BSrf	BSrf	2009-07-01	-5.54602	112.588	90.8825	95.4037	26.3033	-26.7172
	BSwf	BSwf	2009-07-01	-2.95313	30.3703	12.6972	100.137	25.5544	-25.9195
	GRpp	GRpp	2010-07-01	-4.96022	44.8138	105.348	61.7603	8.2137	-8.78199
	GRwf	GRwf	2010-07-01	-3.03935	46.9206	127.285	101.925	3.54571	-4.21479
Schrumpf_2013	Bugac	Bugac.1	2004-07-01	3.93605	-11.3266	-31.9875	5.63631	-10.4706	10.0332
	Carlow	Carlow.1	2004-07-01	1.65711	154.826	114.573	332.714	-46.9966	46.4504
	Easter Bush	Easter Bush.1	2004-07-01	2.30894	137.03	87.1156	189.581	-25.5459	25.1413
	Gebesee	Gebesee.1	2004-07-01	7.62564	195.65	188.451	152.905	-17.946	17.5697
	Grignon	Grignon.1	2004-07-01	6.75324	303.592	176.635	611.074	-18.6225	18.2427
	Hainich	Hainich.1	2004-07-01	6.53219	-1.09715	-41.4188	48.2779	-24.7179	24.3742
	Hesse	Hesse.1	2004-07-01	7.85217	3.14489	-33.9332	34.9443	-14.0786	13.7142
	Laqueuille	Laqueuille.1	2004-07-01	5.78053	34.1531	-10.5871	79.0284	-16.0598	15.6265
	Norunda	Norunda.1	2004-07-01	9.01676	13.0436	-40.5123	52.3788	-12.0426	11.7359
	Sorø	Sorø.1	2004-07-01	7.53103	10.4575	-39.9666	60.9577	-18.4632	18.1566
	Wetzstein	Wetzstein.1	2004-07-01	7.38219	158.199	110.103	194.892	-19.3498	18.9861

## Sheet: MEND
entry_name	site_name	pro_name	date	soc_kgCm2	bulk_14c	HF_14c	LF_14c	HF_c_perc	LF_c_perc
Baisden_2002	China Hat	ChinaHat.1978	1978-07-01	-1.63213	-27.6224	39.5401	-104.061	-25.517	25.3514
	Riverbank	Riverbank.1949	1949-07-01	0.0573697	34.2239	49.1626	19.7044	-39.421	39.2669
		Riverbank.1997	1997-07-01	0.217173	-2.82189	63.336	-17.9039	-31.9816	31.8638
Berhe_2012	Tennessee Valley	hollow comp	2004-07-01	-0.791736	165.25	209.972	93.1607	-67.008	66.9218
		plain comp	2004-07-01	-2.27721	99.1182	111.152	67.6876	-62.195	62.0596
		slope comp	2004-07-01	-1.48568	120.717	128.986	101.704	-49.3094	48.7624
		summit comp	2004-07-01	-2.16214	115.195	121.233	69.5709	-54.3612	54.0149
Harden_2002	Dinesen	DPPR2	1998-05-08	-1.26472	81.0594	82.5329	66.3516	-59.5176	59.1721
Heckman_2010	Chiricahua Rhyolite	CHRY_composite	2006-07-01	-4.92571	49.9242	95.2727	104.348	12.8055	-12.9761
	Flagstaff Basalt	FGBA_composite	2006-07-01	-4.10253	85.385	98.3378	74.1098	5.29959	-5.49648
	Mt. Lemmon Granite	MLGR_composite	2006-07-01	-2.24939	98.7707	101.717	59.3422	21.0506	-21.2187
Heckman_2018	AZ_Mollisol	Basalt	2008-07-01		39.2207	79.9435	14.2661	2.10121	-2.1903
	HI_Andisol	WPL1204	2012-07-01
Lemke_2006	Solling	Solling_DO_F1	2004-07-29
		Solling_DO_F2	2004-07-29
		Solling_DO_F3	2004-07-29
Lybrand_2017	Catalina CZO conifer	mixed conifer_convergent	2015-07-01		65.7228	78.9558	62.3857	-23.5909	23.1287
		mixed conifer_divergent	2015-07-01		15.1744	52.7763	-14.9184	-6.55465	6.13233
	Catalina CZO desert	desert scrub_convergent	2015-07-01		8.41188	75.1622	-11.8245	-35.1136	34.8843
		desert scrub_divergent	2015-07-01		64.4119	115.774	15.2897	-34.1136	33.8843
	Catalina CZO ponderosa	ponderosa pine_convergent	2015-07-01		-9.89593	13.1217	-7.03756	13.3022	-13.8029
		ponderosa pine_divergent	2015-07-01		28.7228	79.0443	19.9909	-13.5909	13.1287
Marin-Spiotta_2008	Sierra de Cayey	10yr secondary forest	2001-07-01		64.7032	77.0408	62.8852	-35.55	41.9212
		20yr secondary forest	2001-07-01		34.7831	45.0408	62.1476	-42.95	48.6212
		30yr secondary forest	2001-07-01		21.0559	32.0408	34.4908	-40.95	46.5212
		80yr secondary forest	2001-07-01		36.7403	46.0408	62.9947	-36.75	46.9212
		Active pastures	2001-07-01		69.3747	83.0408	66.7529	-40.35	53.5212
		Primary forest	2001-07-01		34.0726	47.0408	30.9548	-38.15	45.6212
McFarlane_2013	MA Harvard Forest	H1	2007-11-01	-1.83016	75.7224	104.345	88.6365	-6.50458	3.99097
		H2	2007-11-01	-2.06572	113.124	123.174	97.88	-14.0419	11.0554
		H3	2007-11-01	-2.04315	67.5915	95.1863	51.3289	1.95689	-4.94976
		H4	2007-11-01
		H5	2007-11-01	-1.24882	105.658	148.45	61.0495	-25.0692	21.4471
	MI-Coarse UMBS	60M	2007-11-01	-0.686546	38.2443	43.0161	31.9802	20.5885	-22.5468
		C7	2007-11-01
		D4	2007-11-01
		G3	2007-11-01	-0.606584	59.794	68.6845	90.0433	3.29096	-5.24265
		O2	2007-11-01
	MO Ozark BREA	M1	2007-12-01	-1.30746	-19.4415	-15.8619	-7.87461	-16.4474	15.8158
		M2	2007-12-01	-1.15208	-43.7837	-6.74485	-49.1975	-6.41878	5.40086
		M3	2007-12-01	-1.02654	-43.0998	-12.0747	-37.7735	-11.5237	10.3605
		M4	2007-12-01	-1.07702	-34.3631	-18.6669	-52.7346	-9.21246	8.15879
		M5	2007-12-01	-1.05063	-38.1751	-5.04687	-48.5817	-4.07789	2.92821
	Mi-Fine Colonial Point	C1	2008-11-01	-2.37237				-45.9378	44.6454
		C2	2008-11-01	-3.00452	82.6774	96.3712	74.9207	-43.8875	43.4351
		C3	2008-11-01	-2.64924	70.3126	79.0371	54.8854	-26.983	26.4262
		C4	2008-11-01	-4.1612				-6.60877	5.93339
		C5	2008-11-01	-2.97298				-22.3023	21.2004
	NH Bartlett Forest	B1	2007-11-01	-1.4935	86.6198	99.0347	88.8641	-22.1272	19.3573
		B2	2007-11-01	-1.18244	105.086	133.407	98.4346	-9.34012	7.02779
		B3	2007-11-01	-0.594889	149.824	146.408	154.504	-1.20697	-0.984027
		B4	2007-11-01	-1.87447	98.9476	122.645	68.7962	0.966749	-3.59374
		B5	2007-11-01	-1.37579	123.422	138.447	103.442	28.2003	-30.2546
Meyer_2012	Matsch	Abandoned	2008-10-01	-2.86232	89.23	107.119	46.8699	-46.4581	45.8802
		Meadow	2008-10-01	-2.72232	81.2859	92.2241	63.0911	-50.3673	50.0209
		Pasture	2008-10-01	-3.06432	91.216	102.154	62.1	-43.6415	43.0635
	Stubai	Abandoned	2008-10-01	-4.43278	62.2546	81.4789	38.0001	-7.39369	5.77924
		Meadow	2008-10-01	-3.09378	69.2057	79.4928	44.9664	-40.1655	37.6814
		Pasture	2008-10-01	-3.60278	76.1567	88.4299	56.6586	-40.6464	39.2844
Rasmussen_2018	ANpp	ANpp	2009-07-01	-7.40269	-34.5356	39.2709	-42.6635	-5.15439	4.40276
	ANwf	ANwf	2009-07-01	-4.76522	64.2794	109.27	48.3653	-28.6003	27.6324
	BSpp	BSpp	2009-07-01	-3.85312	58.9675	137.339	13.3587	-0.276134	0.00377622
	BSrf	BSrf	2009-07-01	-5.64766	93.4635	142.896	40.9959	29.8476	-31.3101
	BSwf	BSwf	2009-07-01	-3.04727	-1.02327	56.6323	26.9994	20.1467	-21.1028
	GRpp	GRpp	2010-07-01
	GRwf	GRwf	2010-07-01
Schrumpf_2013	Bugac	Bugac.1	2004-07-01	14.5792	-114.68	-114.67	-130.243	-50.913	50.8933
	Carlow	Carlow.1	2004-07-01	6.93558	56.6776	42.3955	205.574	-79.1082	79.0805
	Easter Bush	Easter Bush.1	2004-07-01	-2.09882	133.41	133.832	141.445	-34.7933	32.8724
	Gebesee	Gebesee.1	2004-07-01	4.69629	140.16	307.967	31.7495	-64.2834	64.1725
	Grignon	Grignon.1	2004-07-01	15.4013	224.657	158.954	475.977	-65.2435	65.2128
	Hainich	Hainich.1	2004-07-01	-2.0455	28.6203	31.0232	8.4029	-52.7569	51.1144
	Hesse	Hesse.1	2004-07-01
	Laqueuille	Laqueuille.1	2004-07-01	-2.70098	34.7909	44.031	18.4993	-31.295	27.8011
	Norunda	Norunda.1	2004-07-01
	Sorø	Sorø.1	2004-07-01	-2.07867	18.234	22.4036	10.3488	-35.453	33.2773
	Wetzstein	Wetzstein.1	2004-07-01	-1.91743	174.738	199.73	135.847	-21.528	20.0559
