# Supplementary material for: Radiocarbon analysis reveals underestimation of soil organic carbon persistence in new-generation soil models
Source: Copernicus journal article supplement (doi:10.5194/gmd-2023-242), 2024-01-19
Supplement: Supplementary file 4 [file israd_and_soilgrids_data.xlsx]

## Sheet: ISRaD data
entry_name	site_name	pro_name	date	lyr_top	lyr_bot	bd	sand	silt	clay	ph_h2o	c_org	soc_kgCm2	son	bulk_15n	bulk_13c	bulk_14c	HF_14c	fLF_14c	oLF_14c	HF_c_perc	fLF_c_perc	oLF_c_perc	LF_c_perc	LF_14c	pro_peatland	pro_permafrost	pro_thermokarst	pro_usda_soil_order	pro_soil_series	pro_soil_taxon	pro_land_cover	pro_lc_phenology	pro_lc_leaf_type	site_lat	site_long	site_elevation	doi	compilation_doi	bibliographical_reference
Baisden_2002	China Hat	ChinaHat.1978	1978-07-01	0	9	1.224					2.20316	2.427				199.2	118.757	338.8	183.742	57.0288	27.051	15.9202	42.9712	281.353				Alfisols	corning/redding		rangeland/grassland			37.4644	-120.369		10.1029/2001GB001822		WT Baisden, R Amundson, AC Cook, DL Brenner, 2002, Turnover and storage of C and N in five density fractions from California annual grassland surface soils, Global Biogeochemical Cycles, 16, 6400-6416
	Riverbank	Riverbank.1949	1949-07-01	0	10	1.24					0.708065	0.878				-61.9	-70.1459	-36.9	-62.0967	67.7871	15.4062	16.8067	32.2129	-50.0461				Alfisols	snelling		rangeland/grassland			37.52	-120.59		10.1029/2001GB001822		WT Baisden, R Amundson, AC Cook, DL Brenner, 2002, Turnover and storage of C and N in five density fractions from California annual grassland surface soils, Global Biogeochemical Cycles, 16, 6400-6416
		Riverbank.1997	1997-07-01	0	10	1.226			9		0.883361	1.083				116.379	93.5057	119.397	107.612	61.7198	17.8221	20.4581	38.2802	113.099				Alfisols	snelling		rangeland/grassland			37.52	-120.59		10.1029/2001GB001822		WT Baisden, R Amundson, AC Cook, DL Brenner, 2002, Turnover and storage of C and N in five density fractions from California annual grassland surface soils, Global Biogeochemical Cycles, 16, 6400-6416
Berhe_2012	Tennessee Valley	hollow comp	2004-07-01	0	5	1.47651	44	32.3333	23.6667	6.7	2.83612	1.96632				-21.6524	-27.3009	50.8256	22.7137	91.3365	4.67943	3.98411	8.66354	37.8978				Mollisols		Oxyaquic Haplustolls	rangeland/grassland			37.848	-122.532		10.1029/2011JG001790		Berhe AA, Harden JW, Torn MS, Kleber M, Burton SD, Harte J, 2012, Persistence of soil organic matter in eroding versus depositional landense fraction (DF)orm positions, Journal of Geophysical Research, 117, 1-16
		plain comp	2004-07-01	0	5	1.63455	25.375	41	33.625	6.5	4.45007	3.02667				64.3401	61.5721	92.3276	92.0083	90.9405	3.34336	5.71613	9.0595	92.1261				Mollisols		Oxyaquic Haplustolls	rangeland/grassland			37.848	-122.532		10.1029/2011JG001790		Berhe AA, Harden JW, Torn MS, Kleber M, Burton SD, Harte J, 2012, Persistence of soil organic matter in eroding versus depositional landense fraction (DF)orm positions, Journal of Geophysical Research, 117, 1-16
		slope comp	2004-07-01	0	5	1.60689	48.25	29.25	22.5	5.4	2.49201	1.67527				-13.9242	-15.1831	30.7154	-29.7928	91.723	4.07892	4.19809	8.27701	0.0257021				Entisols		Lithic Ustorthents	rangeland/grassland			37.848	-122.532		10.1029/2011JG001790		Berhe AA, Harden JW, Torn MS, Kleber M, Burton SD, Harte J, 2012, Persistence of soil organic matter in eroding versus depositional landense fraction (DF)orm positions, Journal of Geophysical Research, 117, 1-16
		summit comp	2004-07-01	0	5	1.32488	49.585	23.8008	25.7842	5.9	4.85911	2.4583				16.1476	12.332	44.8622	74.1555	92.0951	3.65812	4.24682	7.90493	60.5996				Mollisols		Lithic Haplustolls	rangeland/grassland			37.848	-122.532		10.1029/2011JG001790		Berhe AA, Harden JW, Torn MS, Kleber M, Burton SD, Harte J, 2012, Persistence of soil organic matter in eroding versus depositional landense fraction (DF)orm positions, Journal of Geophysical Research, 117, 1-16
Harden_2002	Dinesen	DPPR2	1998-05-08	0	5	0.79892					4.8644	1.94313		1.57975	-20.1597	114.394	112.823	127.675	138.477	90.5813	7.82885	1.58987	9.41872	129.499				Mollisols	Monona	Mollisols	rangeland/grassland			41.7098	-95.2797	397	10.1023/A:1020308729553	10.1126/science.aad4273	Harden, J, TL Fries, MJ Pavich, 2002, Cycling of Beryllium and Carbon through Hillslope Soils in Iowa, 60, 317-355
Heckman_2010	Chiricahua Rhyolite	CHRY_composite	2006-07-01	0	5	1.28	47.0475	41.9439	11	5.8	8.38321	5.24324			-24.9545	93.6338	65.042	46.847	-9.29576	27.4814	48.2601	24.2585	72.5186	28.0665				Inceptisols			forest			31.8875	-109.28	2591	10.5281/zenodo.1486081		Heckman, K.A., 2010. Pedogenesis & carbon dynamics across a lithosequence under ponderosa pine. PhD Dissertation, University of Arizona.
	Flagstaff Basalt	FGBA_composite	2006-07-01	0	10	1.28	20.9657	59.8328	19	6.2	4.40113	4.62942			-23.9734	65.4392	74.1755	91.4169	39.8522	30.3075	33.803	35.8895	69.6925	64.8627				Mollisols			forest			35.1594	-111.741	2195	10.5281/zenodo.1486081		Heckman, K.A., 2010. Pedogenesis & carbon dynamics across a lithosequence under ponderosa pine. PhD Dissertation, University of Arizona.
	Mt. Lemmon Granite	MLGR_composite	2006-07-01	0	10	1.2	70.0646	24.9991	5	5.8	2.82843	2.63278			-24.3906	59.8797	79.1394	100.45	15.9236	20.2209	64.1415	15.6376	79.7791	83.8819				Entisols			forest			32.4189	-110.735	2439	10.5281/zenodo.1486081		Heckman, K.A., 2010. Pedogenesis & carbon dynamics across a lithosequence under ponderosa pine. PhD Dissertation, University of Arizona.
Heckman_2018	AZ_Mollisol	Basalt	2008-07-01	0	10						4.93683					65.9548	75	91.2844	39.8269	26.0056	45.482	28.5124	73.9944	71.4562				Mollisols		Clayey-skeletal, mixed superactive, mesic Typic Paleustoll	forest			35.1594	-111.61	2195	10.1016/j.geoderma.2017.09.043		Heckman K., Lawrence C. R. and Harden J. W. (2018) A sequential selective dissolution method to quantify storage and stability of organic carbon associated with Al and Fe hydroxide phases. Geoderma312, 24–35.
	HI_Andisol	WPL1204	2012-07-01	0	10						27.1639				-28.0786	76.9569	18.8066	91.0156	48.3797	30.3412	68.4456	1.21323	69.6588	90.273				Andisols		Hydrous, ferrihydritic, isothermic Acrudoxic Hydrudand	forest			19.945	-155.262	1204	10.1016/j.geoderma.2017.09.043		Heckman K., Lawrence C. R. and Harden J. W. (2018) A sequential selective dissolution method to quantify storage and stability of organic carbon associated with Al and Fe hydroxide phases. Geoderma312, 24–35.
Lemke_2006	Solling	Solling_DO_F1	2004-07-29	0	5						14.9862					50.0585	30.0171	64.3854	77.2404	34.9506	8.86786	15.3548	24.2226	72.5342				Inceptisols	Cambisol	Dystric	forest	evergreen	needleleaf	51.5167	9.56667	500	israd		Lemke M, 2006, Die C-Dynamik von Waldböden bei reduzierten Stoffeinträgen (Dachprojekt Sollingen, Berichte des Forschungszentrum Waldökosysteme, Reihe A, Band 198
		Solling_DO_F2	2004-07-29	0	5						8.7478					-29.0264	-42.5912	41.6275	-58.1052	29.1568	5.2602	10.472	15.7322	-24.7587				Inceptisols	Cambisol	Dystric	forest	evergreen	needleleaf	51.5167	9.56667	500	israd		Lemke M, 2006, Die C-Dynamik von Waldböden bei reduzierten Stoffeinträgen (Dachprojekt Sollingen, Berichte des Forschungszentrum Waldökosysteme, Reihe A, Band 198
		Solling_DO_F3	2004-07-29	0	5						5.24701					-6.43322	-22.8886	41.0886	-21.5926	63.6936	12.2935	8.00848	20.302	16.3629				Inceptisols	Cambisol	Dystric	forest	evergreen	needleleaf	51.5167	9.56667	500	israd		Lemke M, 2006, Die C-Dynamik von Waldböden bei reduzierten Stoffeinträgen (Dachprojekt Sollingen, Berichte des Forschungszentrum Waldökosysteme, Reihe A, Band 198
Lybrand_2017	Catalina CZO conifer	mixed conifer_convergent	2015-07-01	0	10					5.6						41	47.8804	29.6426	30.1368	66	20	14	34	29.8461				Inceptisols			forest			32.4261	-110.766	2408	10.1007/s10533-017-0360-7		Lybrand R.A., Heckman K., and Rasmussen C. (2017). Soil organic carbon partitioning and Δ14C variation in desert and conifer ecosystems of southern Arizona. Biogeochemistry. 134(3): 261-277.
		mixed conifer_divergent	2015-07-01	0	10					5.7						96	78.0834	114.684	85.9896	48	48	4	52	112.476				Inceptisols			forest			32.4261	-110.766	2408	10.1007/s10533-017-0360-7		Lybrand R.A., Heckman K., and Rasmussen C. (2017). Soil organic carbon partitioning and Δ14C variation in desert and conifer ecosystems of southern Arizona. Biogeochemistry. 134(3): 261-277.
	Catalina CZO desert	desert scrub_convergent	2015-07-01	0	10					6.2						107	67.4435	112	115.51	70	23	7	30	112.819				Entisols			shrubland			32.5559	-110.84	1092	10.1007/s10533-017-0360-7		Lybrand R.A., Heckman K., and Rasmussen C. (2017). Soil organic carbon partitioning and Δ14C variation in desert and conifer ecosystems of southern Arizona. Biogeochemistry. 134(3): 261-277.
		desert scrub_divergent	2015-07-01	0	10					6.2						51	26.8317	85.5348	86.5884	69	26	5	31	85.7047				Entisols			shrubland			32.5559	-110.84	1092	10.1007/s10533-017-0360-7		Lybrand R.A., Heckman K., and Rasmussen C. (2017). Soil organic carbon partitioning and Δ14C variation in desert and conifer ecosystems of southern Arizona. Biogeochemistry. 134(3): 261-277.
	Catalina CZO ponderosa	ponderosa pine_convergent	2015-07-01	0	10					5.5						112	109.696	92.6	107.1	30	65	5	70	93.6357				Mollisols			forest			32.4506	-110.744	2230	10.1007/s10533-017-0360-7		Lybrand R.A., Heckman K., and Rasmussen C. (2017). Soil organic carbon partitioning and Δ14C variation in desert and conifer ecosystems of southern Arizona. Biogeochemistry. 134(3): 261-277.
		ponderosa pine_divergent	2015-07-01	0	10					5.6						78	47.7919	74.9597	35.0839	56	41	3	44	72.2409				Mollisols			forest			32.4506	-110.744	2230	10.1007/s10533-017-0360-7		Lybrand R.A., Heckman K., and Rasmussen C. (2017). Soil organic carbon partitioning and Δ14C variation in desert and conifer ecosystems of southern Arizona. Biogeochemistry. 134(3): 261-277.
Marin-Spiotta_2008	Sierra de Cayey	10yr secondary forest	2001-07-01	0	10	1	10	61	29							97.3348	99	78	93	78.3	4.3	10.9	15.2	88.7566					Los Guineos	Inceptic Hapludox	forest			18.0167	-66.0833	640	10.1016/j.geoderma.2007.10.001		Marin-spiotta E, Swanston CW, Torn MS, Silver WL, Burton SD, 2008, Chemical and mineral control of soil carbon turnover in abandoned tropical pastures, Geoderma, 143, 49-62
		20yr secondary forest	2001-07-01	0	10	0.9	19	56	25							127.255	131	91	87	85.7	5.3	3.2	8.5	89.4941					Los Guineos	Inceptic Hapludox	forest			18.0167	-66.0833	640	10.1016/j.geoderma.2007.10.001		Marin-spiotta E, Swanston CW, Torn MS, Silver WL, Burton SD, 2008, Chemical and mineral control of soil carbon turnover in abandoned tropical pastures, Geoderma, 143, 49-62
		30yr secondary forest	2001-07-01	0	10	0.77	15	58	27							140.982	144	109	121	83.7	3.4	7.2	10.6	117.151					Los Guineos	Inceptic Hapludox	forest			18.0167	-66.0833	640	10.1016/j.geoderma.2007.10.001		Marin-spiotta E, Swanston CW, Torn MS, Silver WL, Burton SD, 2008, Chemical and mineral control of soil carbon turnover in abandoned tropical pastures, Geoderma, 143, 49-62
		80yr secondary forest	2001-07-01	0	10	0.73	13	57	30							125.298	130	86	96	79.5	7.5	2.7	10.2	88.6471					Los Guineos	Inceptic Hapludox	forest			18.0167	-66.0833	640	10.1016/j.geoderma.2007.10.001		Marin-spiotta E, Swanston CW, Torn MS, Silver WL, Burton SD, 2008, Chemical and mineral control of soil carbon turnover in abandoned tropical pastures, Geoderma, 143, 49-62
		Active pastures	2001-07-01	0	10	0.8	3	62	34							92.6632	93	69	91	83.1	1	2.6	3.6	84.8889					Los Guineos	Inceptic Hapludox	rangeland/grassland			18.0167	-66.0833	640	10.1016/j.geoderma.2007.10.001		Marin-spiotta E, Swanston CW, Torn MS, Silver WL, Burton SD, 2008, Chemical and mineral control of soil carbon turnover in abandoned tropical pastures, Geoderma, 143, 49-62
		Primary forest	2001-07-01	0	10	0.7	4	60	36							127.965	129	113	126	80.9	4.7	6.8	11.5	120.687					Los Guineos	Inceptic Hapludox	forest			18.0167	-66.0833	640	10.1016/j.geoderma.2007.10.001		Marin-spiotta E, Swanston CW, Torn MS, Silver WL, Burton SD, 2008, Chemical and mineral control of soil carbon turnover in abandoned tropical pastures, Geoderma, 143, 49-62
McFarlane_2013	MA Harvard Forest	H1	2007-11-01	0	5	0.207179	59.9149	34.8345	5.25052	3.75	5.52974	2.07179				47.9736	22.139	61.4409	3.83381	52.7327	23.6668	23.6005	47.2673	32.6778				Inceptisols	Gloucester	sandy, skeletal, mixed, mesic, Typic Dystrudepts	forest			42.5377	-72.1715	343	10.1007/s10533-012-9740-1		McFarlane et al. 2013. Comparison of soil organic matter dynamics at five temperate deciduous forests with physical fractionation and radiocarbon measurements. Biogeochemistry DOI 10.1007/s10533-012-9740-1
		H2	2007-11-01	0	5	0.22724	60.1321	34.7443	5.12368	3.98	8.14635	2.2724				9.71308	1.56417	35.6351	-13.3623	60.084	29.9113	10.0047	39.916	23.3542				Inceptisols	Gloucester	sandy, skeletal, mixed, mesic, Typic Dystrudepts	forest			42.5377	-72.1715	343	10.1007/s10533-012-9740-1		McFarlane et al. 2013. Comparison of soil organic matter dynamics at five temperate deciduous forests with physical fractionation and radiocarbon measurements. Biogeochemistry DOI 10.1007/s10533-012-9740-1
		H3	2007-11-01	0	5	0.224944	66.0078	20.4539	13.5383	3.98333	7.73155	2.24944				55.2357	29.5316	77.5893	30.3647	44.08	46.8204	9.09957	55.92	69.9047				Inceptisols	Gloucester	sandy, skeletal, mixed, mesic, Typic Dystrudepts	forest			42.5377	-72.1715	343	10.1007/s10533-012-9740-1		McFarlane et al. 2013. Comparison of soil organic matter dynamics at five temperate deciduous forests with physical fractionation and radiocarbon measurements. Biogeochemistry DOI 10.1007/s10533-012-9740-1
		H4	2007-11-01	0	5	0.194996	59.848	26.5082	13.6438	3.35667	15.0436	1.94996				53.0185	34.0164	74.2842	36.3523	14.2028	70.862	14.9351	85.7972	67.6812				Inceptisols	Gloucester	sandy, skeletal, mixed, mesic, Typic Dystrudepts	forest			42.5377	-72.1715	343	10.1007/s10533-012-9740-1		McFarlane et al. 2013. Comparison of soil organic matter dynamics at five temperate deciduous forests with physical fractionation and radiocarbon measurements. Biogeochemistry DOI 10.1007/s10533-012-9740-1
		H5	2007-11-01	0	5	0.142277	59.3669	24.1528	16.4803	4.42667	4.3196	1.42277			-26.69	16.4531	-25.3413	86.826	1.47938	70.3624	20.4144	9.22322	29.6376	60.2661				Inceptisols	Gloucester	sandy, skeletal, mixed, mesic, Typic Dystrudepts	forest			42.5377	-72.1715	343	10.1007/s10533-012-9740-1		McFarlane et al. 2013. Comparison of soil organic matter dynamics at five temperate deciduous forests with physical fractionation and radiocarbon measurements. Biogeochemistry DOI 10.1007/s10533-012-9740-1
	MI-Coarse UMBS	60M	2007-11-01	0	5	1.43305	92.521	7.35863	0.120358	4.99	1.16265	0.833066			-27.14	75.3578	73.8867	82.8892	54.5888	23.6875	66.0303	10.2822	76.3125	79.0761				Spodosols	Rubicon or Blue Lake	sandy, mixed, frigid, Entic and Lamellic Haplorthods,	forest			45.5598	-84.7138	235	10.1007/s10533-012-9740-1		McFarlane et al. 2013. Comparison of soil organic matter dynamics at five temperate deciduous forests with physical fractionation and radiocarbon measurements. Biogeochemistry DOI 10.1007/s10533-012-9740-1
		C7	2007-11-01	0	5	0.783354	78.4225	21.0391	0.538457	4.37667	1.48991	0.583563			-27.55	61.3958	48.7641	69.8351	40.725	36.1544	50.015	13.8307	63.8456	63.5291				Spodosols	Rubicon or Blue Lake	sandy, mixed, frigid, Entic and Lamellic Haplorthods,	forest			45.5598	-84.7138	235	10.1007/s10533-012-9740-1		McFarlane et al. 2013. Comparison of soil organic matter dynamics at five temperate deciduous forests with physical fractionation and radiocarbon measurements. Biogeochemistry DOI 10.1007/s10533-012-9740-1
		D4	2007-11-01	0	5	0.852387	91.9655	7.22887	0.805591	3.85333	1.55512	0.662782			-26.29	46.1548	50.5222	47.7779	11.6735	39.374	47.5096	13.1164	60.626	39.9667				Spodosols	Rubicon or Blue Lake	sandy, mixed, frigid, Entic and Lamellic Haplorthods,	forest			45.5598	-84.7138	235	10.1007/s10533-012-9740-1		McFarlane et al. 2013. Comparison of soil organic matter dynamics at five temperate deciduous forests with physical fractionation and radiocarbon measurements. Biogeochemistry DOI 10.1007/s10533-012-9740-1
		G3	2007-11-01	0	5	0.677356	91.5769	7.76622	0.656863	4.38667	2.22183	0.752485			-26.69	53.3552	48.6993	18.9472	20.7257	43.4826	41.8339	14.6835	56.5174	19.4093				Spodosols	Rubicon or Blue Lake	sandy, mixed, frigid, Entic and Lamellic Haplorthods,	forest			45.5598	-84.7138	235	10.1007/s10533-012-9740-1		McFarlane et al. 2013. Comparison of soil organic matter dynamics at five temperate deciduous forests with physical fractionation and radiocarbon measurements. Biogeochemistry DOI 10.1007/s10533-012-9740-1
		O2	2007-11-01	0	5	0.673929	86.6921	11.877	1.43089	3.93667	1.7908	0.603436			-26.59	77.7073	63.3439	78.5711	58.6875	40.3611	49.4452	10.1937	59.6389	75.1725				Spodosols	Rubicon or Blue Lake	sandy, mixed, frigid, Entic and Lamellic Haplorthods,	forest			45.5598	-84.7138	235	10.1007/s10533-012-9740-1		McFarlane et al. 2013. Comparison of soil organic matter dynamics at five temperate deciduous forests with physical fractionation and radiocarbon measurements. Biogeochemistry DOI 10.1007/s10533-012-9740-1
	MO Ozark BREA	M1	2007-12-01	0	5	0.985312	4.74764	78.0185	17.2339	5.82	3.29095	1.62456			-26.77	113.732	111.586	88.1608	109.011	56.7291	15.6263	27.6446	43.2709	101.481				Alfisols	Weller	fine, smectitic, mesic, Aquertic, Chromic Hapludalfs	forest			38.7441	-92.2	232	10.1007/s10533-012-9740-1		McFarlane et al. 2013. Comparison of soil organic matter dynamics at five temperate deciduous forests with physical fractionation and radiocarbon measurements. Biogeochemistry DOI 10.1007/s10533-012-9740-1
		M2	2007-12-01	0	5	0.892778	3.16114	77.9194	18.9194	4.13	3.01765	1.34705				117.297	88.0447	117.31	109.905	58.5389	24.6116	16.8495	41.4611	114.3				Alfisols	Weller	fine, smectitic, mesic, Aquertic, Chromic Hapludalfs	forest			38.7441	-92.2	232	10.1007/s10533-012-9740-1		McFarlane et al. 2013. Comparison of soil organic matter dynamics at five temperate deciduous forests with physical fractionation and radiocarbon measurements. Biogeochemistry DOI 10.1007/s10533-012-9740-1
		M3	2007-12-01	0	5	0.920196	6.27787	76.6332	17.0889	4.71	2.59518	1.19562				114.772	89.3192	102.773	104.694	62.7546	19.2451	18.0003	37.2454	103.702				Alfisols	Weller	fine, smectitic, mesic, Aquertic, Chromic Hapludalfs	forest			38.7441	-92.2	232	10.1007/s10533-012-9740-1		McFarlane et al. 2013. Comparison of soil organic matter dynamics at five temperate deciduous forests with physical fractionation and radiocarbon measurements. Biogeochemistry DOI 10.1007/s10533-012-9740-1
		M4	2007-12-01	0	5	0.967442	3.24491	78.9274	17.8277	5.15	2.61344	1.26418				108.432	97.7049	124.929	119.525	57.55	21.8815	20.5685	42.45	122.31				Alfisols	Weller	fine, smectitic, mesic, Aquertic, Chromic Hapludalfs	forest			38.7441	-92.2	232	10.1007/s10533-012-9740-1		McFarlane et al. 2013. Comparison of soil organic matter dynamics at five temperate deciduous forests with physical fractionation and radiocarbon measurements. Biogeochemistry DOI 10.1007/s10533-012-9740-1
		M5	2007-12-01	0	5	0.862424	2.83334	77.4684	19.6983	4.84333	2.83216	1.22164				110.175	82.3888	108.941	122.631	54.6417	24.4846	20.8737	45.3583	115.241				Alfisols	Weller	fine, smectitic, mesic, Aquertic, Chromic Hapludalfs	forest			38.7441	-92.2	232	10.1007/s10533-012-9740-1		McFarlane et al. 2013. Comparison of soil organic matter dynamics at five temperate deciduous forests with physical fractionation and radiocarbon measurements. Biogeochemistry DOI 10.1007/s10533-012-9740-1
	Mi-Fine Colonial Point	C1	2008-11-01	0	5	1.49143	57.1455	26.8774	15.977	5.72	3.4369	2.59875			-26.92	70.4062	63.5031	58.4687	48.2163	84.8202	8.43609	6.7437	15.1798	53.914				Alfisols	Rudyard	very-fine, mixed, active, frigid Aquic Glossudalfs	forest			45.4846	-84.6843	206	10.1007/s10533-012-9740-1		McFarlane et al. 2013. Comparison of soil organic matter dynamics at five temperate deciduous forests with physical fractionation and radiocarbon measurements. Biogeochemistry DOI 10.1007/s10533-012-9740-1
		C2	2008-11-01	0	5	1.27687	53.9507	28.3164	17.7329	6.42333	5.6203	3.63415			-26.98	46.2754	44.3769	48.5582	50.688	72.4094	16.3117	11.2789	27.5906	49.4288				Alfisols	Rudyard	very-fine, mixed, active, frigid Aquic Glossudalfs	forest			45.4846	-84.6843	206	10.1007/s10533-012-9740-1		McFarlane et al. 2013. Comparison of soil organic matter dynamics at five temperate deciduous forests with physical fractionation and radiocarbon measurements. Biogeochemistry DOI 10.1007/s10533-012-9740-1
		C3	2008-11-01	0	5	0.935741	37.8921	47.5237	14.5842	6.31667	6.7108	3.16224			-27.8	63.7941	60.0796	85.5506	73.685	57.5767	12.5843	29.839	42.4233	77.2048				Alfisols	Rudyard	very-fine, mixed, active, frigid Aquic Glossudalfs	forest			45.4846	-84.6843	206	10.1007/s10533-012-9740-1		McFarlane et al. 2013. Comparison of soil organic matter dynamics at five temperate deciduous forests with physical fractionation and radiocarbon measurements. Biogeochemistry DOI 10.1007/s10533-012-9740-1
		C4	2008-11-01	0	5	0.865728	29.1091	52.8873	18.0036	6.20667	10.594	4.58576			-27.29	63.9314	69.1295	73.3961	68.2883	39.1049	12.2525	48.6425	60.8951	69.316				Alfisols	Rudyard	very-fine, mixed, active, frigid Aquic Glossudalfs	forest			45.4846	-84.6843	206	10.1007/s10533-012-9740-1		McFarlane et al. 2013. Comparison of soil organic matter dynamics at five temperate deciduous forests with physical fractionation and radiocarbon measurements. Biogeochemistry DOI 10.1007/s10533-012-9740-1
		C5	2008-11-01	0	5	1.29266	56.5399	29.6398	13.8203	5.86333	4.9722	3.23694			-27.26	60.2659	44.8926	76.9383	67.312	59.604	15.9036	24.4925	40.396	71.1018				Alfisols	Rudyard	very-fine, mixed, active, frigid Aquic Glossudalfs	forest			45.4846	-84.6843	206	10.1007/s10533-012-9740-1		McFarlane et al. 2013. Comparison of soil organic matter dynamics at five temperate deciduous forests with physical fractionation and radiocarbon measurements. Biogeochemistry DOI 10.1007/s10533-012-9740-1
	NH Bartlett Forest	B1	2007-11-01	0	5	0.742228	71.8434	17.9993	10.1573	3.73667	4.6281	1.71755				33.2959	23.4106	33.3764	13.1691	69.1021	23.9064	6.99149	30.8979	28.8039				Spodosols	Berskhire	coarse, loamy, isotic, frigid, Typic Haplorthods	forest			44.0647	-71.288	269	10.1007/s10533-012-9740-1		McFarlane et al. 2013. Comparison of soil organic matter dynamics at five temperate deciduous forests with physical fractionation and radiocarbon measurements. Biogeochemistry DOI 10.1007/s10533-012-9740-1
		B2	2007-11-01	0	5	1.03182	62.8332	27.695	9.4718	3.54667	2.80566	1.44747				15.8775	-8.94009	21.097	14.7399	56.1565	32.411	11.4325	43.8435	19.4393				Spodosols	Berskhire	coarse, loamy, isotic, frigid, Typic Haplorthods	forest			44.0647	-71.288	269	10.1007/s10533-012-9740-1		McFarlane et al. 2013. Comparison of soil organic matter dynamics at five temperate deciduous forests with physical fractionation and radiocarbon measurements. Biogeochemistry DOI 10.1007/s10533-012-9740-1
		B3	2007-11-01	0	5	0.783599	62.5726	28.8663	8.56114	3.49667	2.22975	0.873614				-28.4988	-21.2564	-21.014	-77.2099	47.935	37.6805	14.3845	52.065	-36.5398				Spodosols	Berskhire	coarse, loamy, isotic, frigid, Typic Haplorthods	forest			44.0647	-71.288	269	10.1007/s10533-012-9740-1		McFarlane et al. 2013. Comparison of soil organic matter dynamics at five temperate deciduous forests with physical fractionation and radiocarbon measurements. Biogeochemistry DOI 10.1007/s10533-012-9740-1
		B4	2007-11-01	0	5	0.792166	64.9685	26.7314	8.30006	3.67667	5.32669	2.10981				21.2514	0.35379	53.4427	25.0896	45.9834	45.3966	8.61999	54.0166	48.9181				Spodosols	Berskhire	coarse, loamy, isotic, frigid, Typic Haplorthods	forest			44.0647	-71.288	269	10.1007/s10533-012-9740-1		McFarlane et al. 2013. Comparison of soil organic matter dynamics at five temperate deciduous forests with physical fractionation and radiocarbon measurements. Biogeochemistry DOI 10.1007/s10533-012-9740-1
		B5	2007-11-01	0	5	0.705018	67.0669	24.2844	8.6487	3.44	4.74276	1.67187			-26.1276	-1.63206	-12.4228	21.9913	-74.1679	18.3962	75.3726	6.23125	81.6038	14.6486				Spodosols	Berskhire	coarse, loamy, isotic, frigid, Typic Haplorthods	forest			44.0647	-71.288	269	10.1007/s10533-012-9740-1		McFarlane et al. 2013. Comparison of soil organic matter dynamics at five temperate deciduous forests with physical fractionation and radiocarbon measurements. Biogeochemistry DOI 10.1007/s10533-012-9740-1
Meyer_2012	Matsch	Abandoned	2008-10-01	0	10	0.5					8.92	4.46				45.6377	31.7356	80.837	98.2672	70.6278	19.0583	10.3139	29.3722	86.9575						Cambisol	rangeland/grassland			46.71	10.64	1790	10.5194/bg-9-853-2012		S Meyer, J Leifeld, M Bahn, J Fuhrer, 2012, Free and protected soil organic carbon dynamics respond differently to abandonment of mountain grassland, Biogeosciences, 9, p. 853-865
		Meadow	2008-10-01	0	10	0.5					8.64	4.32				53.5818	46.6307	52.8095	88.3371	74.537	12.5	12.7315	25.2315	70.7362						Cambisol	rangeland/grassland			46.71	10.64	1790	10.5194/bg-9-853-2012		S Meyer, J Leifeld, M Bahn, J Fuhrer, 2012, Free and protected soil organic carbon dynamics respond differently to abandonment of mountain grassland, Biogeosciences, 9, p. 853-865
		Pasture	2008-10-01	0	10	0.6					7.77	4.662				43.6517	36.7007	69.8654	77.414	67.8112	24.2489	7.93991	32.1888	71.7274						Cambisol	rangeland/grassland			46.71	10.64	1790	10.5194/bg-9-853-2012		S Meyer, J Leifeld, M Bahn, J Fuhrer, 2012, Free and protected soil organic carbon dynamics respond differently to abandonment of mountain grassland, Biogeosciences, 9, p. 853-865
	Stubai	Abandoned	2008-10-01	0	10	0.5					9.58	4.79				41.6657	26.7706	61.3206	73.442	47.8079	43.4238	8.76827	52.1921	63.357						Cambisol	rangeland/grassland			47.13	11.305	1820	10.5194/bg-9-853-2012		S Meyer, J Leifeld, M Bahn, J Fuhrer, 2012, Free and protected soil organic carbon dynamics respond differently to abandonment of mountain grassland, Biogeosciences, 9, p. 853-865
		Meadow	2008-10-01	0	10	0.7					4.93	3.451				34.7146	28.7566	54.5748	58.5468	80.5797	11.0145	9.27536	20.2899	56.3906						Cambisol	rangeland/grassland			47.13	11.305	1820	10.5194/bg-9-853-2012		S Meyer, J Leifeld, M Bahn, J Fuhrer, 2012, Free and protected soil organic carbon dynamics respond differently to abandonment of mountain grassland, Biogeosciences, 9, p. 853-865
		Pasture	2008-10-01	0	10	0.6					6.6	3.96				27.7636	19.8195	40.0455	49.6098	81.0606	9.59596	9.09091	18.6869	44.6984						Cambisol	rangeland/grassland			47.13	11.305	1820	10.5194/bg-9-853-2012		S Meyer, J Leifeld, M Bahn, J Fuhrer, 2012, Free and protected soil organic carbon dynamics respond differently to abandonment of mountain grassland, Biogeosciences, 9, p. 853-865
Rasmussen_2018	ANpp	ANpp	2009-07-01	0	6	1.14	38.225		24.348	6.2	10.92	7.46928				119.1	73.3075	152.664	60.504	39.0915	34.6482	26.2603	60.9085	112.93				Ultisols		fine, parasesquic, mesic Andic Palehumult	forest			38.7101	-120.55	1167	10.3390/soilsystems2030041		C. Rasmussen, H. Throckmorton, G. Liles, K. Heckman, S. Meding and W.R. Horwath, 2018, Controls on soil organic carbon partitioning and stabilization in the California Sierra Nevada, Soil Systems, 2(3), 41
	ANwf	ANwf	2009-07-01	0	10	0.63	61.904		4.068	6.3	7.69	4.8447				8.5	-5.22706	14.4095	-59.2514	59.9009	37.776	2.32307	40.0991	10.1421				Andisols		medial-skeletal, amorphic, mesic Humic Haploxerand	forest			38.6985	-120.398	1737	10.3390/soilsystems2030041		C. Rasmussen, H. Throckmorton, G. Liles, K. Heckman, S. Meding and W.R. Horwath, 2018, Controls on soil organic carbon partitioning and stabilization in the California Sierra Nevada, Soil Systems, 2(3), 41
	BSpp	BSpp	2009-07-01	0	10	0.62	36.732		26.787	6.2	7.45	4.1571				73	25.7605	120.635	49.634	36.3413	46.304	17.3547	63.6587	101.279				Ultisols		fine, kaolinitic, mesic Xeric Haplohumult	forest			40.5005	-121.921	921	10.3390/soilsystems2030041		C. Rasmussen, H. Throckmorton, G. Liles, K. Heckman, S. Meding and W.R. Horwath, 2018, Controls on soil organic carbon partitioning and stabilization in the California Sierra Nevada, Soil Systems, 2(3), 41
	BSrf	BSrf	2009-07-01	0	9	0.78	94.715		3.309	6.33	9.01	5.75577				7.8	-10.2227	47.7554	-12.4378	5.04477	88.2769	6.67832	94.9552	43.522				Entisols		sandy-skeletal, mixed, superactive, frigid Typic Xerorthent	forest			40.5864	-121.383	2301	10.3390/soilsystems2030041		C. Rasmussen, H. Throckmorton, G. Liles, K. Heckman, S. Meding and W.R. Horwath, 2018, Controls on soil organic carbon partitioning and stabilization in the California Sierra Nevada, Soil Systems, 2(3), 41
	BSwf	BSwf	2009-07-01	0	8	0.89	64.877		6.295	6.52	4.71	3.18584				83.4	59.3535	49.4346	-54.4735	12.0964	79.2619	8.64166	87.9036	39.2196				Inceptisols		loamy-skeletal, mixed, superactive, mesic Typic Haploxerept	forest			40.5354	-121.623	1585	10.3390/soilsystems2030041		C. Rasmussen, H. Throckmorton, G. Liles, K. Heckman, S. Meding and W.R. Horwath, 2018, Controls on soil organic carbon partitioning and stabilization in the California Sierra Nevada, Soil Systems, 2(3), 41
	GRpp	GRpp	2010-07-01	0	10	1.05	60		15	5.6	4.76	4.998				75.2	23.5305	79.0634	9.42396	30.1308	43.8688	26.0004	69.8692	53.1485				Alfisols		fine-loamy, mixed, semiactive, mesic Ultic Haploxeralf	forest			37.0612	-119.372	1385	10.3390/soilsystems2030041		C. Rasmussen, H. Throckmorton, G. Liles, K. Heckman, S. Meding and W.R. Horwath, 2018, Controls on soil organic carbon partitioning and stabilization in the California Sierra Nevada, Soil Systems, 2(3), 41
	GRwf	GRwf	2010-07-01	0	9	0.59	79.5		4.5	6	5.79	3.07449				78	9.07831	24.2966	-24.5445	24.4852	67.3296	8.18524	75.5148	19.0026				Inceptisols		coarse-loamy, mixed, superactive, mesic Humic Dystroxerept	forest			37.0549	-119.146	1789	10.3390/soilsystems2030041		C. Rasmussen, H. Throckmorton, G. Liles, K. Heckman, S. Meding and W.R. Horwath, 2018, Controls on soil organic carbon partitioning and stabilization in the California Sierra Nevada, Soil Systems, 2(3), 41
Schrumpf_2013	Bugac	Bugac.1	2004-07-01	0	5	0.86	60.1	17.9	22	7.8	7.4	3.2				138.011	127.825	155.7	148.675	62.3418	33.2278	4.43038	37.6582	154.874						Eutric Arenosol	rangeland/grassland			46.8	18.9		10.5194/bg-10-1675-2013		M. Schrumpf, K. Kaiser, G. Guggenberger, T. Persson, I. Kӧgel-Knabner, E.-D. Schulze, 2013, Storage and stability of organic carbon soils as related to depth, occlusion within aggregates, and attachment to minerals, Biogeosciences, 10, 1675-1691
	Carlow	Carlow.1	2004-07-01	0	5	1.17	57.2	21.4	21.4	7.7	2.4	1.4				-33.3841	-25.3667	-183.233	-178.333	94.8529	2.94118	2.20588	5.14706	-181.133						Eutric Cambisol	cultivated			52.85	-6.9		10.5194/bg-10-1675-2013		M. Schrumpf, K. Kaiser, G. Guggenberger, T. Persson, I. Kӧgel-Knabner, E.-D. Schulze, 2013, Storage and stability of organic carbon soils as related to depth, occlusion within aggregates, and attachment to minerals, Biogeosciences, 10, 1675-1691
	Easter Bush	Easter Bush.1	2004-07-01	0	5	0.96	55.9	19.5	24.6	5.6	4.8	2.3				-4.43622	-0.733333	-5.6	-38.1667	73.1602	19.4805	7.35931	26.8398	-14.5296						Stagnic Cambisol	rangeland/grassland			55.8667	-3.16667		10.5194/bg-10-1675-2013		M. Schrumpf, K. Kaiser, G. Guggenberger, T. Persson, I. Kӧgel-Knabner, E.-D. Schulze, 2013, Storage and stability of organic carbon soils as related to depth, occlusion within aggregates, and attachment to minerals, Biogeosciences, 10, 1675-1691
	Gebesee	Gebesee.1	2004-07-01	0	5	1.04	3	61.3	35.8	7.1	2.7	1.4				-82.3325	-117.167	18.0667	-1.26667	73.2283	19.685	7.08661	26.7717	12.949						Haplic Phaeozem	cultivated			51.1	10.9167		10.5194/bg-10-1675-2013		M. Schrumpf, K. Kaiser, G. Guggenberger, T. Persson, I. Kӧgel-Knabner, E.-D. Schulze, 2013, Storage and stability of organic carbon soils as related to depth, occlusion within aggregates, and attachment to minerals, Biogeosciences, 10, 1675-1691
	Grignon	Grignon.1	2004-07-01	0	5	1.36	8	58.1	33.9	7.7	2.2	1.5				-200.474	-115.233	-528	-299.5	74.8299	17.0068	8.16327	25.1701	-453.892						Eutric Cambisol	cultivated			48.85	1.96667		10.5194/bg-10-1675-2013		M. Schrumpf, K. Kaiser, G. Guggenberger, T. Persson, I. Kӧgel-Knabner, E.-D. Schulze, 2013, Storage and stability of organic carbon soils as related to depth, occlusion within aggregates, and attachment to minerals, Biogeosciences, 10, 1675-1691
	Hainich	Hainich.1	2004-07-01	0	5	0.77	2.4	45.9	51.7	6	6.2	2.4				94.2727	90.886	124.192	105.522	86.3281	7.42188	6.25	13.6719	115.657						Eutric Cambisol	forest	deciduous		51.0667	10.45		10.5194/bg-10-1675-2013		M. Schrumpf, K. Kaiser, G. Guggenberger, T. Persson, I. Kӧgel-Knabner, E.-D. Schulze, 2013, Storage and stability of organic carbon soils as related to depth, occlusion within aggregates, and attachment to minerals, Biogeosciences, 10, 1675-1691
	Hesse	Hesse.1	2004-07-01	0	5	0.82	10.7	57.8	31.4	4.7	3.4	1.4				101.909	88.19	139.985	122.01	68.9655	17.931	13.1034	31.0345	132.396						Stagnic Luvisol	forest	deciduous		48.6667	7.08333		10.5194/bg-10-1675-2013		M. Schrumpf, K. Kaiser, G. Guggenberger, T. Persson, I. Kӧgel-Knabner, E.-D. Schulze, 2013, Storage and stability of organic carbon soils as related to depth, occlusion within aggregates, and attachment to minerals, Biogeosciences, 10, 1675-1691
	Laqueuille	Laqueuille.1	2004-07-01	0	5	0.46	18.6	55.1	26.3	5.3	12.6	2.9				72.0878	65.66	76.6	93.14	69.6246	11.6041	18.7713	30.3754	86.8213						Umbric Andosol	rangeland/grassland			45.6333	2.73333		10.5194/bg-10-1675-2013		M. Schrumpf, K. Kaiser, G. Guggenberger, T. Persson, I. Kӧgel-Knabner, E.-D. Schulze, 2013, Storage and stability of organic carbon soils as related to depth, occlusion within aggregates, and attachment to minerals, Biogeosciences, 10, 1675-1691
	Norunda	Norunda.1	2004-07-01	0	5	0.45	49.7	36.4	14	4.1	6.7	1.5				70.4763	65.0333	86.2	54.6667	55.8824	31.7647	12.3529	44.1176	77.3707						Haplic Podzol	forest	evergreen		60.0833	17.4833		10.5194/bg-10-1675-2013		M. Schrumpf, K. Kaiser, G. Guggenberger, T. Persson, I. Kӧgel-Knabner, E.-D. Schulze, 2013, Storage and stability of organic carbon soils as related to depth, occlusion within aggregates, and attachment to minerals, Biogeosciences, 10, 1675-1691
	Sorø	Sorø.1	2004-07-01	0	5	0.77	48.2	26	25.8	5.9	6.2	2.4				96.8519	93.51	101.292	107.433	70.3704	12.7572	16.8724	29.6296	104.789						Gleyic Cambisol	forest	deciduous		55.4833	11.6333		10.5194/bg-10-1675-2013		M. Schrumpf, K. Kaiser, G. Guggenberger, T. Persson, I. Kӧgel-Knabner, E.-D. Schulze, 2013, Storage and stability of organic carbon soils as related to depth, occlusion within aggregates, and attachment to minerals, Biogeosciences, 10, 1675-1691
	Wetzstein	Wetzstein.1	2004-07-01	0	10	0.31	23.3	50.4	26.3	3.5	7.7	2.4				-37.4601	-48	28.8667	-38.4667	70.4918	11.4754	18.0328	29.5082	-12.2815						Cambic Podzol	forest	evergreen		50.45	11.45		10.5194/bg-10-1675-2013		M. Schrumpf, K. Kaiser, G. Guggenberger, T. Persson, I. Kӧgel-Knabner, E.-D. Schulze, 2013, Storage and stability of organic carbon soils as related to depth, occlusion within aggregates, and attachment to minerals, Biogeosciences, 10, 1675-1691

## Sheet: forcing (ISRaD+SoilGrids)
entry_name	site_name	pro_name	site_lat	site_long	site_elevation	pro_land_cover	lyr_top	lyr_bot	bd	sand	silt	clay	ph_h2o	pro_soil_taxon	pro_lc_leaf_type
Baisden_2002	China Hat	ChinaHat.1978	37.4644	-120.369		rangeland/grassland	0	9	1.224	31.0165	38.4068	30.5898	6.59875
	Riverbank	Riverbank.1949	37.52	-120.59		rangeland/grassland	0	10	1.24	35.6913	43.62	20.6843	6.87671
		Riverbank.1997	37.52	-120.59		rangeland/grassland	0	10	1.226	35.6913	43.62	9	6.87671
Berhe_2012	Tennessee Valley	hollow comp	37.848	-122.532		rangeland/grassland	0	5	1.47651	44	32.3333	23.6667	6.7	Oxyaquic Haplustolls
		plain comp	37.848	-122.532		rangeland/grassland	0	5	1.63455	25.375	41	33.625	6.5	Oxyaquic Haplustolls
		slope comp	37.848	-122.532		rangeland/grassland	0	5	1.60689	48.25	29.25	22.5	5.4	Lithic Ustorthents
		summit comp	37.848	-122.532		rangeland/grassland	0	5	1.32488	49.585	23.8008	25.7842	5.9	Lithic Haplustolls
Harden_2002	Dinesen	DPPR2	41.7098	-95.2797	397	rangeland/grassland	0	5	0.79892	6.656	58.524	34.825	6.392	Mollisols
Heckman_2010	Chiricahua Rhyolite	CHRY_composite	31.8875	-109.28	2591	forest	0	5	1.28	47.0475	41.9439	11	5.8
	Flagstaff Basalt	FGBA_composite	35.1594	-111.741	2195	forest	0	10	1.28	20.9657	59.8328	19	6.2
	Mt. Lemmon Granite	MLGR_composite	32.4189	-110.735	2439	forest	0	10	1.2	70.0646	24.9991	5	5.8
Heckman_2018	AZ_Mollisol	Basalt	35.1594	-111.61	2195	forest	0	10	1.43745	30.8481	41.4792	27.666	6.59567	Clayey-skeletal, mixed superactive, mesic Typic Paleustoll
	HI_Andisol	WPL1204	19.945	-155.262	1204	forest	0	10	1.00915	35.1902	33.6805	31.1335	5.16656	Hydrous, ferrihydritic, isothermic Acrudoxic Hydrudand
Lemke_2006	Solling	Solling_DO_F1	51.5167	9.56667	500	forest	0	5	1.0366	23.198	51.278	25.54	5.039	Dystric	needleleaf
		Solling_DO_F2	51.5167	9.56667	500	forest	0	5	1.0366	23.198	51.278	25.54	5.039	Dystric	needleleaf
		Solling_DO_F3	51.5167	9.56667	500	forest	0	5	1.0366	23.198	51.278	25.54	5.039	Dystric	needleleaf
Lybrand_2017	Catalina CZO conifer	mixed conifer_convergent	32.4261	-110.766	2408	forest	0	10	1.1989	59.8689	27.3445	12.7802	5.6
		mixed conifer_divergent	32.4261	-110.766	2408	forest	0	10	1.1989	59.8689	27.3445	12.7802	5.7
	Catalina CZO desert	desert scrub_convergent	32.5559	-110.84	1092	shrubland	0	10	1.40085	39.0652	36.0869	24.8484	6.2
		desert scrub_divergent	32.5559	-110.84	1092	shrubland	0	10	1.40085	39.0652	36.0869	24.8484	6.2
	Catalina CZO ponderosa	ponderosa pine_convergent	32.4506	-110.744	2230	forest	0	10	1.22605	50.4888	31.5451	17.9666	5.5
		ponderosa pine_divergent	32.4506	-110.744	2230	forest	0	10	1.22605	50.4888	31.5451	17.9666	5.6
Marin-Spiotta_2008	Sierra de Cayey	10yr secondary forest	18.0167	-66.0833	640	forest	0	10	1	10	61	29	5.52481	Inceptic Hapludox
		20yr secondary forest	18.0167	-66.0833	640	forest	0	10	0.9	19	56	25	5.52481	Inceptic Hapludox
		30yr secondary forest	18.0167	-66.0833	640	forest	0	10	0.77	15	58	27	5.52481	Inceptic Hapludox
		80yr secondary forest	18.0167	-66.0833	640	forest	0	10	0.73	13	57	30	5.52481	Inceptic Hapludox
		Active pastures	18.0167	-66.0833	640	rangeland/grassland	0	10	0.8	3	62	34	5.52481	Inceptic Hapludox
		Primary forest	18.0167	-66.0833	640	forest	0	10	0.7	4	60	36	5.52481	Inceptic Hapludox
McFarlane_2013	MA Harvard Forest	H1	42.5377	-72.1715	343	forest	0	5	0.207179	59.9149	34.8345	5.25052	3.75	sandy, skeletal, mixed, mesic, Typic Dystrudepts
		H2	42.5377	-72.1715	343	forest	0	5	0.22724	60.1321	34.7443	5.12368	3.98	sandy, skeletal, mixed, mesic, Typic Dystrudepts
		H3	42.5377	-72.1715	343	forest	0	5	0.224944	66.0078	20.4539	13.5383	3.98333	sandy, skeletal, mixed, mesic, Typic Dystrudepts
		H4	42.5377	-72.1715	343	forest	0	5	0.194996	59.848	26.5082	13.6438	3.35667	sandy, skeletal, mixed, mesic, Typic Dystrudepts
		H5	42.5377	-72.1715	343	forest	0	5	0.142277	59.3669	24.1528	16.4803	4.42667	sandy, skeletal, mixed, mesic, Typic Dystrudepts
	MI-Coarse UMBS	60M	45.5598	-84.7138	235	forest	0	5	1.43305	92.521	7.35863	0.120358	4.99	sandy, mixed, frigid, Entic and Lamellic Haplorthods,
		C7	45.5598	-84.7138	235	forest	0	5	0.783354	78.4225	21.0391	0.538457	4.37667	sandy, mixed, frigid, Entic and Lamellic Haplorthods,
		D4	45.5598	-84.7138	235	forest	0	5	0.852387	91.9655	7.22887	0.805591	3.85333	sandy, mixed, frigid, Entic and Lamellic Haplorthods,
		G3	45.5598	-84.7138	235	forest	0	5	0.677356	91.5769	7.76622	0.656863	4.38667	sandy, mixed, frigid, Entic and Lamellic Haplorthods,
		O2	45.5598	-84.7138	235	forest	0	5	0.673929	86.6921	11.877	1.43089	3.93667	sandy, mixed, frigid, Entic and Lamellic Haplorthods,
	MO Ozark BREA	M1	38.7441	-92.2	232	forest	0	5	0.985312	4.74764	78.0185	17.2339	5.82	fine, smectitic, mesic, Aquertic, Chromic Hapludalfs
		M2	38.7441	-92.2	232	forest	0	5	0.892778	3.16114	77.9194	18.9194	4.13	fine, smectitic, mesic, Aquertic, Chromic Hapludalfs
		M3	38.7441	-92.2	232	forest	0	5	0.920196	6.27787	76.6332	17.0889	4.71	fine, smectitic, mesic, Aquertic, Chromic Hapludalfs
		M4	38.7441	-92.2	232	forest	0	5	0.967442	3.24491	78.9274	17.8277	5.15	fine, smectitic, mesic, Aquertic, Chromic Hapludalfs
		M5	38.7441	-92.2	232	forest	0	5	0.862424	2.83334	77.4684	19.6983	4.84333	fine, smectitic, mesic, Aquertic, Chromic Hapludalfs
	Mi-Fine Colonial Point	C1	45.4846	-84.6843	206	forest	0	5	1.49143	57.1455	26.8774	15.977	5.72	very-fine, mixed, active, frigid Aquic Glossudalfs
		C2	45.4846	-84.6843	206	forest	0	5	1.27687	53.9507	28.3164	17.7329	6.42333	very-fine, mixed, active, frigid Aquic Glossudalfs
		C3	45.4846	-84.6843	206	forest	0	5	0.935741	37.8921	47.5237	14.5842	6.31667	very-fine, mixed, active, frigid Aquic Glossudalfs
		C4	45.4846	-84.6843	206	forest	0	5	0.865728	29.1091	52.8873	18.0036	6.20667	very-fine, mixed, active, frigid Aquic Glossudalfs
		C5	45.4846	-84.6843	206	forest	0	5	1.29266	56.5399	29.6398	13.8203	5.86333	very-fine, mixed, active, frigid Aquic Glossudalfs
	NH Bartlett Forest	B1	44.0647	-71.288	269	forest	0	5	0.742228	71.8434	17.9993	10.1573	3.73667	coarse, loamy, isotic, frigid, Typic Haplorthods
		B2	44.0647	-71.288	269	forest	0	5	1.03182	62.8332	27.695	9.4718	3.54667	coarse, loamy, isotic, frigid, Typic Haplorthods
		B3	44.0647	-71.288	269	forest	0	5	0.783599	62.5726	28.8663	8.56114	3.49667	coarse, loamy, isotic, frigid, Typic Haplorthods
		B4	44.0647	-71.288	269	forest	0	5	0.792166	64.9685	26.7314	8.30006	3.67667	coarse, loamy, isotic, frigid, Typic Haplorthods
		B5	44.0647	-71.288	269	forest	0	5	0.705018	67.0669	24.2844	8.6487	3.44	coarse, loamy, isotic, frigid, Typic Haplorthods
Meyer_2012	Matsch	Abandoned	46.71	10.64	1790	rangeland/grassland	0	10	0.5	40.5306	38.88	20.5776	6.55544	Cambisol
		Meadow	46.71	10.64	1790	rangeland/grassland	0	10	0.5	40.5306	38.88	20.5776	6.55544	Cambisol
		Pasture	46.71	10.64	1790	rangeland/grassland	0	10	0.6	40.5306	38.88	20.5776	6.55544	Cambisol
	Stubai	Abandoned	47.13	11.305	1820	rangeland/grassland	0	10	0.5	40.4164	40.3019	19.2828	5.52163	Cambisol
		Meadow	47.13	11.305	1820	rangeland/grassland	0	10	0.7	40.4164	40.3019	19.2828	5.52163	Cambisol
		Pasture	47.13	11.305	1820	rangeland/grassland	0	10	0.6	40.4164	40.3019	19.2828	5.52163	Cambisol
Rasmussen_2018	ANpp	ANpp	38.7101	-120.55	1167	forest	0	6	1.14	38.225	36.5967	24.348	6.2	fine, parasesquic, mesic Andic Palehumult
	ANwf	ANwf	38.6985	-120.398	1737	forest	0	10	0.63	61.904	29.2847	4.068	6.3	medial-skeletal, amorphic, mesic Humic Haploxerand
	BSpp	BSpp	40.5005	-121.921	921	forest	0	10	0.62	36.732	35.1939	26.787	6.2	fine, kaolinitic, mesic Xeric Haplohumult
	BSrf	BSrf	40.5864	-121.383	2301	forest	0	9	0.78	94.715	25.8704	3.309	6.33	sandy-skeletal, mixed, superactive, frigid Typic Xerorthent
	BSwf	BSwf	40.5354	-121.623	1585	forest	0	8	0.89	64.877	25.7476	6.295	6.52	loamy-skeletal, mixed, superactive, mesic Typic Haploxerept
	GRpp	GRpp	37.0612	-119.372	1385	forest	0	10	1.05	60	22.7347	15	5.6	fine-loamy, mixed, semiactive, mesic Ultic Haploxeralf
	GRwf	GRwf	37.0549	-119.146	1789	forest	0	9	0.59	79.5	18.165	4.5	6	coarse-loamy, mixed, superactive, mesic Humic Dystroxerept
Schrumpf_2013	Bugac	Bugac.1	46.8	18.9		rangeland/grassland	0	5	0.86	60.1	17.9	22	7.8	Eutric Arenosol
	Carlow	Carlow.1	52.85	-6.9		cultivated	0	5	1.17	57.2	21.4	21.4	7.7	Eutric Cambisol
	Easter Bush	Easter Bush.1	55.8667	-3.16667		rangeland/grassland	0	5	0.96	55.9	19.5	24.6	5.6	Stagnic Cambisol
	Gebesee	Gebesee.1	51.1	10.9167		cultivated	0	5	1.04	3	61.3	35.8	7.1	Haplic Phaeozem
	Grignon	Grignon.1	48.85	1.96667		cultivated	0	5	1.36	8	58.1	33.9	7.7	Eutric Cambisol
	Hainich	Hainich.1	51.0667	10.45		forest	0	5	0.77	2.4	45.9	51.7	6	Eutric Cambisol
	Hesse	Hesse.1	48.6667	7.08333		forest	0	5	0.82	10.7	57.8	31.4	4.7	Stagnic Luvisol
	Laqueuille	Laqueuille.1	45.6333	2.73333		rangeland/grassland	0	5	0.46	18.6	55.1	26.3	5.3	Umbric Andosol
	Norunda	Norunda.1	60.0833	17.4833		forest	0	5	0.45	49.7	36.4	14	4.1	Haplic Podzol
	Sorø	Sorø.1	55.4833	11.6333		forest	0	5	0.77	48.2	26	25.8	5.9	Gleyic Cambisol
	Wetzstein	Wetzstein.1	50.45	11.45		forest	0	10	0.31	23.3	50.4	26.3	3.5	Cambic Podzol
