# Supplementary material for: Radiocarbon analysis reveals underestimation of soil organic carbon persistence in new-generation soil models
Source: Copernicus journal article supplement (doi:10.5194/gmd-2023-242), 2024-01-19
Supplement: Supplementary file 5 [file observed_and_predicted.xlsx]

## Sheet: observed
entry_name	site_name	pro_name	date	soc_kgCm2	bulk_14c	HF_14c	LF_14c	fLF_14c	oLF_14c	HF_c_perc	LF_c_perc	fLF_c_perc	oLF_c_perc
Baisden_2002	China Hat	ChinaHat.1978	1978-07-01	2.427	199.2	118.757	281.353	338.8	183.742	57.0288	42.9712	27.051	15.9202
	Riverbank	Riverbank.1949	1949-07-01	0.878	-61.9	-70.1459	-50.0461	-36.9	-62.0967	67.7871	32.2129	15.4062	16.8067
		Riverbank.1997	1997-07-01	1.083	116.379	93.5057	113.099	119.397	107.612	61.7198	38.2802	17.8221	20.4581
Berhe_2012	Tennessee Valley	hollow comp	2004-07-01	1.96632	-21.6524	-27.3009	37.8978	50.8256	22.7137	91.3365	8.66354	4.67943	3.98411
		plain comp	2004-07-01	3.02667	64.3401	61.5721	92.1261	92.3276	92.0083	90.9405	9.0595	3.34336	5.71613
		slope comp	2004-07-01	1.67527	-13.9242	-15.1831	0.0257021	30.7154	-29.7928	91.723	8.27701	4.07892	4.19809
		summit comp	2004-07-01	2.4583	16.1476	12.332	60.5996	44.8622	74.1555	92.0951	7.90493	3.65812	4.24682
Harden_2002	Dinesen	DPPR2	1998-05-08	1.94313	114.394	112.823	129.499	127.675	138.477	90.5813	9.41872	7.82885	1.58987
Heckman_2010	Chiricahua Rhyolite	CHRY_composite	2006-07-01	5.24324	93.6338	65.042	28.0665	46.847	-9.29576	27.4814	72.5186	48.2601	24.2585
	Flagstaff Basalt	FGBA_composite	2006-07-01	4.62942	65.4392	74.1755	64.8627	91.4169	39.8522	30.3075	69.6925	33.803	35.8895
	Mt. Lemmon Granite	MLGR_composite	2006-07-01	2.63278	59.8797	79.1394	83.8819	100.45	15.9236	20.2209	79.7791	64.1415	15.6376
Heckman_2018	AZ_Mollisol	Basalt	2008-07-01		65.9548	75	71.4562	91.2844	39.8269	26.0056	73.9944	45.482	28.5124
	HI_Andisol	WPL1204	2012-07-01		76.9569	18.8066	90.273	91.0156	48.3797	30.3412	69.6588	68.4456	1.21323
Lemke_2006	Solling	Solling_DO_F1	2004-07-29		50.0585	30.0171	72.5342	64.3854	77.2404	34.9506	24.2226	8.86786	15.3548
		Solling_DO_F2	2004-07-29		-29.0264	-42.5912	-24.7587	41.6275	-58.1052	29.1568	15.7322	5.2602	10.472
		Solling_DO_F3	2004-07-29		-6.43322	-22.8886	16.3629	41.0886	-21.5926	63.6936	20.302	12.2935	8.00848
Lybrand_2017	Catalina CZO conifer	mixed conifer_convergent	2015-07-01		41	47.8804	29.8461	29.6426	30.1368	66	34	20	14
		mixed conifer_divergent	2015-07-01		96	78.0834	112.476	114.684	85.9896	48	52	48	4
	Catalina CZO desert	desert scrub_convergent	2015-07-01		107	67.4435	112.819	112	115.51	70	30	23	7
		desert scrub_divergent	2015-07-01		51	26.8317	85.7047	85.5348	86.5884	69	31	26	5
	Catalina CZO ponderosa	ponderosa pine_convergent	2015-07-01		112	109.696	93.6357	92.6	107.1	30	70	65	5
		ponderosa pine_divergent	2015-07-01		78	47.7919	72.2409	74.9597	35.0839	56	44	41	3
Marin-Spiotta_2008	Sierra de Cayey	10yr secondary forest	2001-07-01		97.3348	99	88.7566	78	93	78.3	15.2	4.3	10.9
		20yr secondary forest	2001-07-01		127.255	131	89.4941	91	87	85.7	8.5	5.3	3.2
		30yr secondary forest	2001-07-01		140.982	144	117.151	109	121	83.7	10.6	3.4	7.2
		80yr secondary forest	2001-07-01		125.298	130	88.6471	86	96	79.5	10.2	7.5	2.7
		Active pastures	2001-07-01		92.6632	93	84.8889	69	91	83.1	3.6	1	2.6
		Primary forest	2001-07-01		127.965	129	120.687	113	126	80.9	11.5	4.7	6.8
McFarlane_2013	MA Harvard Forest	H1	2007-11-01	2.07179	47.9736	22.139	32.6778	61.4409	3.83381	52.7327	47.2673	23.6668	23.6005
		H2	2007-11-01	2.2724	9.71308	1.56417	23.3542	35.6351	-13.3623	60.084	39.916	29.9113	10.0047
		H3	2007-11-01	2.24944	55.2357	29.5316	69.9047	77.5893	30.3647	44.08	55.92	46.8204	9.09957
		H4	2007-11-01	1.94996	53.0185	34.0164	67.6812	74.2842	36.3523	14.2028	85.7972	70.862	14.9351
		H5	2007-11-01	1.42277	16.4531	-25.3413	60.2661	86.826	1.47938	70.3624	29.6376	20.4144	9.22322
	MI-Coarse UMBS	60M	2007-11-01	0.833066	75.3578	73.8867	79.0761	82.8892	54.5888	23.6875	76.3125	66.0303	10.2822
		C7	2007-11-01	0.583563	61.3958	48.7641	63.5291	69.8351	40.725	36.1544	63.8456	50.015	13.8307
		D4	2007-11-01	0.662782	46.1548	50.5222	39.9667	47.7779	11.6735	39.374	60.626	47.5096	13.1164
		G3	2007-11-01	0.752485	53.3552	48.6993	19.4093	18.9472	20.7257	43.4826	56.5174	41.8339	14.6835
		O2	2007-11-01	0.603436	77.7073	63.3439	75.1725	78.5711	58.6875	40.3611	59.6389	49.4452	10.1937
	MO Ozark BREA	M1	2007-12-01	1.62456	113.732	111.586	101.481	88.1608	109.011	56.7291	43.2709	15.6263	27.6446
		M2	2007-12-01	1.34705	117.297	88.0447	114.3	117.31	109.905	58.5389	41.4611	24.6116	16.8495
		M3	2007-12-01	1.19562	114.772	89.3192	103.702	102.773	104.694	62.7546	37.2454	19.2451	18.0003
		M4	2007-12-01	1.26418	108.432	97.7049	122.31	124.929	119.525	57.55	42.45	21.8815	20.5685
		M5	2007-12-01	1.22164	110.175	82.3888	115.241	108.941	122.631	54.6417	45.3583	24.4846	20.8737
	Mi-Fine Colonial Point	C1	2008-11-01	2.59875	70.4062	63.5031	53.914	58.4687	48.2163	84.8202	15.1798	8.43609	6.7437
		C2	2008-11-01	3.63415	46.2754	44.3769	49.4288	48.5582	50.688	72.4094	27.5906	16.3117	11.2789
		C3	2008-11-01	3.16224	63.7941	60.0796	77.2048	85.5506	73.685	57.5767	42.4233	12.5843	29.839
		C4	2008-11-01	4.58576	63.9314	69.1295	69.316	73.3961	68.2883	39.1049	60.8951	12.2525	48.6425
		C5	2008-11-01	3.23694	60.2659	44.8926	71.1018	76.9383	67.312	59.604	40.396	15.9036	24.4925
	NH Bartlett Forest	B1	2007-11-01	1.71755	33.2959	23.4106	28.8039	33.3764	13.1691	69.1021	30.8979	23.9064	6.99149
		B2	2007-11-01	1.44747	15.8775	-8.94009	19.4393	21.097	14.7399	56.1565	43.8435	32.411	11.4325
		B3	2007-11-01	0.873614	-28.4988	-21.2564	-36.5398	-21.014	-77.2099	47.935	52.065	37.6805	14.3845
		B4	2007-11-01	2.10981	21.2514	0.35379	48.9181	53.4427	25.0896	45.9834	54.0166	45.3966	8.61999
		B5	2007-11-01	1.67187	-1.63206	-12.4228	14.6486	21.9913	-74.1679	18.3962	81.6038	75.3726	6.23125
Meyer_2012	Matsch	Abandoned	2008-10-01	4.46	45.6377	31.7356	86.9575	80.837	98.2672	70.6278	29.3722	19.0583	10.3139
		Meadow	2008-10-01	4.32	53.5818	46.6307	70.7362	52.8095	88.3371	74.537	25.2315	12.5	12.7315
		Pasture	2008-10-01	4.662	43.6517	36.7007	71.7274	69.8654	77.414	67.8112	32.1888	24.2489	7.93991
	Stubai	Abandoned	2008-10-01	4.79	41.6657	26.7706	63.357	61.3206	73.442	47.8079	52.1921	43.4238	8.76827
		Meadow	2008-10-01	3.451	34.7146	28.7566	56.3906	54.5748	58.5468	80.5797	20.2899	11.0145	9.27536
		Pasture	2008-10-01	3.96	27.7636	19.8195	44.6984	40.0455	49.6098	81.0606	18.6869	9.59596	9.09091
Rasmussen_2018	ANpp	ANpp	2009-07-01	7.46928	119.1	73.3075	112.93	152.664	60.504	39.0915	60.9085	34.6482	26.2603
	ANwf	ANwf	2009-07-01	4.8447	8.5	-5.22706	10.1421	14.4095	-59.2514	59.9009	40.0991	37.776	2.32307
	BSpp	BSpp	2009-07-01	4.1571	73	25.7605	101.279	120.635	49.634	36.3413	63.6587	46.304	17.3547
	BSrf	BSrf	2009-07-01	5.75577	7.8	-10.2227	43.522	47.7554	-12.4378	5.04477	94.9552	88.2769	6.67832
	BSwf	BSwf	2009-07-01	3.18584	83.4	59.3535	39.2196	49.4346	-54.4735	12.0964	87.9036	79.2619	8.64166
	GRpp	GRpp	2010-07-01	4.998	75.2	23.5305	53.1485	79.0634	9.42396	30.1308	69.8692	43.8688	26.0004
	GRwf	GRwf	2010-07-01	3.07449	78	9.07831	19.0026	24.2966	-24.5445	24.4852	75.5148	67.3296	8.18524
Schrumpf_2013	Bugac	Bugac.1	2004-07-01	3.2	138.011	127.825	154.874	155.7	148.675	62.3418	37.6582	33.2278	4.43038
	Carlow	Carlow.1	2004-07-01	1.4	-33.3841	-25.3667	-181.133	-183.233	-178.333	94.8529	5.14706	2.94118	2.20588
	Easter Bush	Easter Bush.1	2004-07-01	2.3	-4.43622	-0.733333	-14.5296	-5.6	-38.1667	73.1602	26.8398	19.4805	7.35931
	Gebesee	Gebesee.1	2004-07-01	1.4	-82.3325	-117.167	12.949	18.0667	-1.26667	73.2283	26.7717	19.685	7.08661
	Grignon	Grignon.1	2004-07-01	1.5	-200.474	-115.233	-453.892	-528	-299.5	74.8299	25.1701	17.0068	8.16327
	Hainich	Hainich.1	2004-07-01	2.4	94.2727	90.886	115.657	124.192	105.522	86.3281	13.6719	7.42188	6.25
	Hesse	Hesse.1	2004-07-01	1.4	101.909	88.19	132.396	139.985	122.01	68.9655	31.0345	17.931	13.1034
	Laqueuille	Laqueuille.1	2004-07-01	2.9	72.0878	65.66	86.8213	76.6	93.14	69.6246	30.3754	11.6041	18.7713
	Norunda	Norunda.1	2004-07-01	1.5	70.4763	65.0333	77.3707	86.2	54.6667	55.8824	44.1176	31.7647	12.3529
	Sorø	Sorø.1	2004-07-01	2.4	96.8519	93.51	104.789	101.292	107.433	70.3704	29.6296	12.7572	16.8724
	Wetzstein	Wetzstein.1	2004-07-01	2.4	-37.4601	-48	-12.2815	28.8667	-38.4667	70.4918	29.5082	11.4754	18.0328

## Sheet: MIMICS
entry_name	site_name	pro_name	date	soc_kgCm2	bulk_14c	HF_14c	LF_14c	HF_c_perc	LF_c_perc
Baisden_2002	China Hat	ChinaHat.1978	1978-07-01	0.659465	71.5674	-35.3198	184.693	62.8435	23.0401
	Riverbank	Riverbank.1949	1949-07-01	0.41231	-37.8117	-51.6537	-20.0448	54.8545	30.0923
		Riverbank.1997	1997-07-01	0.452741	158.983	112.758	196.794	36.4923	45.7409
Berhe_2012	Tennessee Valley	hollow comp	2004-07-01	0.553657	49.7207	1.3345	174.71	68.8578	21.2865
		plain comp	2004-07-01	0.813866	6.30696	-36.0336	173.758	77.7299	14.4807
		slope comp	2004-07-01	0.530971	54.4788	5.61125	174.803	67.7215	22.1959
		summit comp	2004-07-01	0.598449	40.9132	-6.44432	174.532	70.8761	19.6932
Harden_2002	Dinesen	DPPR2	1998-05-08	1.51865	16.8369	-34.5966	216.194	77.2307	13.838
Heckman_2010	Chiricahua Rhyolite	CHRY_composite	2006-07-01	0.219837	111.007	36.4112	168.165	38.7991	46.4474
	Flagstaff Basalt	FGBA_composite	2006-07-01	0.700046	85.2892	9.35143	158.239	45.9032	38.7998
	Mt. Lemmon Granite	MLGR_composite	2006-07-01	0.401214	126.807	61.0542	172.393	35.0768	50.7346
Heckman_2018	AZ_Mollisol	Basalt	2008-07-01	0.892615	52.3716	-19.3523	153.117	55.879	30.373
	HI_Andisol	WPL1204	2012-07-01	1.16668	13.99	-33.541	145.924	71.4546	19.9402
Lemke_2006	Solling	Solling_DO_F1	2004-07-29	1.19032	61.03	-8.83019	186.581	61.8137	25.6898
		Solling_DO_F2	2004-07-29	1.19032	61.03	-8.83019	186.581	61.8137	25.6898
		Solling_DO_F3	2004-07-29	1.19032	61.03	-8.83019	186.581	61.8137	25.6898
Lybrand_2017	Catalina CZO conifer	mixed conifer_convergent	2015-07-01	0.488909	85.6487	34.0412	135.879	42.5922	42.977
		mixed conifer_divergent	2015-07-01	0.488909	85.6487	34.0412	135.879	42.5922	42.977
	Catalina CZO desert	desert scrub_convergent	2015-07-01	0.670777	30.7996	-4.99244	126.294	67.6818	21.781
		desert scrub_divergent	2015-07-01	0.670777	30.7996	-4.99244	126.294	67.6818	21.781
	Catalina CZO ponderosa	ponderosa pine_convergent	2015-07-01	0.555332	71.6436	16.5172	135.67	48.3095	37.8344
		ponderosa pine_divergent	2015-07-01	0.555332	71.6436	16.5172	135.67	48.3095	37.8344
Marin-Spiotta_2008	Sierra de Cayey	10yr secondary forest	2001-07-01	1.74771	11.7082	-32.2453	173.51	77.6971	15.398
		20yr secondary forest	2001-07-01	1.49207	27.4239	-20.5325	173.879	74.214	18.0358
		30yr secondary forest	2001-07-01	1.61342	19.6432	-26.3119	173.701	75.9972	16.6794
		80yr secondary forest	2001-07-01	1.82014	7.67646	-35.2817	173.41	78.5151	14.7853
		Active pastures	2001-07-01	2.51374	-22.9302	-47.0921	179.98	88.3365	7.58241
		Primary forest	2001-07-01	2.34166	-17.6074	-54.7833	172.718	82.9736	11.4929
McFarlane_2013	MA Harvard Forest	H1	2007-11-01	0.782962	116.265	33.5289	148.252	26.5191	57.5868
		H2	2007-11-01	0.781207	116.492	33.902	148.267	26.4161	57.7167
		H3	2007-11-01	0.915504	98.862	9.7935	147.303	34.1197	49.221
		H4	2007-11-01	0.917488	98.6065	9.49719	147.29	34.2265	49.1143
		H5	2007-11-01	0.974446	91.3993	1.55311	146.944	37.1785	46.2358
	MI-Coarse UMBS	60M	2007-11-01	0.440183	115.869	53.2327	130.275	17.445	69.0686
		C7	2007-11-01	0.445082	115.386	51.849	130.12	17.5916	68.3024
		D4	2007-11-01	0.447578	115.078	50.9847	130.045	17.713	67.9188
		G3	2007-11-01	0.446218	115.249	51.4649	130.085	17.644	68.1272
		O2	2007-11-01	0.45282	114.35	48.9847	129.896	18.0281	67.1273
	MO Ozark BREA	M1	2007-12-01	0.670171	97.7441	40.5008	160.493	47.5586	38.3956
		M2	2007-12-01	0.700462	91.9583	33.112	160.476	49.4277	36.7341
		M3	2007-12-01	0.667692	98.2264	41.1355	160.495	47.4	38.5382
		M4	2007-12-01	0.680531	95.7429	37.8989	160.488	48.2121	37.8107
		M5	2007-12-01	0.715418	89.1756	29.6956	160.465	50.3052	35.9658
	Mi-Fine Colonial Point	C1	2008-11-01	0.575715	90.8141	5.68447	126.559	28.8138	52.983
		C2	2008-11-01	0.594759	87.0804	0.559418	126.264	30.4635	51.2824
		C3	2008-11-01	0.561562	93.6038	9.75601	126.788	27.5544	54.3219
		C4	2008-11-01	0.597822	86.4826	-0.230683	126.218	30.7238	51.0191
		C5	2008-11-01	0.554129	95.0714	11.994	126.913	26.8828	55.0526
	NH Bartlett Forest	B1	2007-11-01	0.900899	103.775	14.1669	140.664	28.2525	55.0265
		B2	2007-11-01	0.889928	105.128	16.0084	140.758	27.6378	55.7078
		B3	2007-11-01	0.875772	106.873	18.4664	140.882	26.8387	56.6122
		B4	2007-11-01	0.871797	107.362	19.1738	140.918	26.6134	56.8715
		B5	2007-11-01	0.877113	106.707	18.2294	140.87	26.9146	56.5252
Meyer_2012	Matsch	Abandoned	2008-10-01	2.9989	35.1705	-1.99577	157.524	73.8677	16.2718
		Meadow	2008-10-01	2.9989	35.1705	-1.99577	157.524	73.8677	16.2718
		Pasture	2008-10-01	2.9989	35.1705	-1.99577	157.524	73.8677	16.2718
	Stubai	Abandoned	2008-10-01	2.28049	51.5465	8.69968	162.209	68.2918	20.3235
		Meadow	2008-10-01	2.28049	51.5465	8.69968	162.209	68.2918	20.3235
		Pasture	2008-10-01	2.28049	51.5465	8.69968	162.209	68.2918	20.3235
Rasmussen_2018	ANpp	ANpp	2009-07-01	0.211217	-14.518	-41.1317	-17.0535	10.8375	70.376
	ANwf	ANwf	2009-07-01	0.300703	-6.45034	-2.99092	-12.3006	4.70191	82.5568
	BSpp	BSpp	2009-07-01	0.389783	96.9296	-3.6934	136.03	26.786	52.9009
	BSrf	BSrf	2009-07-01	0.23992	14.3361	46.0686	1.89053	3.86055	81.5685
	BSwf	BSwf	2009-07-01	0.217995	13.6942	35.5206	0.907112	4.31352	79.6766
	GRpp	GRpp	2010-07-01	0.210901	-150.446	-7.87475	-163.24	1.49958	80.9746
	GRwf	GRwf	2010-07-01	0.178859	-150.04	40.5163	-161.714	0.979016	85.9183
Schrumpf_2013	Bugac	Bugac.1	2004-07-01	1.04114	61.5543	20.5955	192.396	72.0506	18.7644
	Carlow	Carlow.1	2004-07-01	0.581816	71.8514	16.1629	160.98	57.7321	27.6454
	Easter Bush	Easter Bush.1	2004-07-01	0.841619	66.665	4.49937	167.384	59.4016	25.8917
	Gebesee	Gebesee.1	2004-07-01	2.11236	-6.94167	-42.1262	190.17	82.7244	10.212
	Grignon	Grignon.1	2004-07-01	1.69405	-1.4112	-36.9842	176.119	81.3189	11.5306
	Hainich	Hainich.1	2004-07-01	3.40311	-77.5161	-121.49	183.901	84.8652	8.96637
	Hesse	Hesse.1	2004-07-01	1.53468	29.8895	-32.7236	174.786	68.5096	20.8079
	Laqueuille	Laqueuille.1	2004-07-01	1.37876	25.3586	-13.303	173.559	76.9579	14.4618
	Norunda	Norunda.1	2004-07-01	1.89754	73.4478	-24.8045	85.3769	10.5984	73.1023
	Sorø	Sorø.1	2004-07-01	1.24529	59.0927	-11.7398	170.364	59.3818	27.8062
	Wetzstein	Wetzstein.1	2004-07-01	2.77528	58.673	-11.2525	190.178	63.5037	24.3732

## Sheet: Millennial
entry_name	site_name	pro_name	date	soc_kgCm2	bulk_14c	HF_14c	LF_14c	HF_c_perc	LF_c_perc
Baisden_2002	China Hat	ChinaHat.1978	1978-07-01	3.48717	160.68	158.242	185.31	91.2884	8.53468
	Riverbank	Riverbank.1949	1949-07-01	2.97308	-22.8622	-22.8581	-22.9032	91.3101	8.55617
		Riverbank.1997	1997-07-01	3.43921	177.072	177.984	167.881	91.2471	8.55753
Berhe_2012	Tennessee Valley	hollow comp	2004-07-01	3.93635	177.761	178.244	171.922	92.478	7.38186
		plain comp	2004-07-01	4.10405	175.8	176.254	170.308	92.4812	7.38366
		slope comp	2004-07-01	4.36167	173.213	173.628	168.188	92.4879	7.38389
		summit comp	2004-07-01	4.10166	176.203	176.658	170.689	92.4848	7.37988
Harden_2002	Dinesen	DPPR2	1998-05-08	5.27039	211.103	211.488	207.686	91.3373	8.55708
Heckman_2010	Chiricahua Rhyolite	CHRY_composite	2006-07-01	5.3345	98.7982	98.9049	97.6589	91.5825	8.34808
	Flagstaff Basalt	FGBA_composite	2006-07-01	4.32271	131.006	131.195	128.843	91.9805	7.9009
	Mt. Lemmon Granite	MLGR_composite	2006-07-01	8.64006	71.4686	71.4757	71.4	91.0613	8.89809
Heckman_2018	AZ_Mollisol	Basalt	2008-07-01	4.15862	131.009	131.225	128.66	91.8722	8.01542
	HI_Andisol	WPL1204	2012-07-01	3.02053	147.639	147.902	144.422	92.5443	7.34544
Lemke_2006	Solling	Solling_DO_F1	2004-07-29	6.93269	179.125	180.048	167.863	92.5991	7.17927
		Solling_DO_F2	2004-07-29	6.93269	179.125	180.048	167.863	92.5991	7.17927
		Solling_DO_F3	2004-07-29	6.93269	179.125	180.048	167.863	92.5991	7.17927
Lybrand_2017	Catalina CZO conifer	mixed conifer_convergent	2015-07-01	11.8514	51.5278	51.57	51.1075	91.0474	8.93946
		mixed conifer_divergent	2015-07-01	11.7318	52.1624	52.2063	51.7257	91.0459	8.94084
	Catalina CZO desert	desert scrub_convergent	2015-07-01	17.1279	25.94	25.9357	25.9832	91.0926	8.89951
		desert scrub_divergent	2015-07-01	17.1279	25.94	25.9357	25.9832	91.0926	8.89951
	Catalina CZO ponderosa	ponderosa pine_convergent	2015-07-01	14.2638	39.4426	39.4586	39.2837	91.0695	8.92019
		ponderosa pine_divergent	2015-07-01	14.1192	40.0087	40.0258	39.8392	91.0682	8.92137
Marin-Spiotta_2008	Sierra de Cayey	10yr secondary forest	2001-07-01	7.54199	146.903	147.081	144.769	92.3848	7.56313
		20yr secondary forest	2001-07-01	7.35608	148.544	148.735	146.262	92.3856	7.56079
		30yr secondary forest	2001-07-01	7.2495	149.497	149.694	147.126	92.3856	7.55994
		80yr secondary forest	2001-07-01	7.2183	149.777	149.977	147.379	92.3855	7.55976
		Active pastures	2001-07-01	7.26687	144.018	144.18	142.1	92.3212	7.62637
		Primary forest	2001-07-01	7.27633	149.256	149.452	146.908	92.3856	7.56012
McFarlane_2013	MA Harvard Forest	H1	2007-11-01	4.72604	149.523	149.77	146.408	92.7131	7.08504
		H2	2007-11-01	4.8829	148.945	149.18	145.975	92.754	7.05229
		H3	2007-11-01	4.49109	150.243	150.51	146.904	92.6462	7.13948
		H4	2007-11-01	4.65963	149.767	150.02	146.59	92.6954	7.0987
		H5	2007-11-01	3.79278	151.452	151.785	147.416	92.4036	7.33545
	MI-Coarse UMBS	60M	2007-11-01	3.85258	135.063	135.223	133.17	92.3754	7.43873
		C7	2007-11-01	4.80189	123.322	123.397	122.405	92.5489	7.30319
		D4	2007-11-01	3.26742	142.495	142.733	139.732	92.2156	7.56041
		G3	2007-11-01	2.86025	146.701	147.006	143.219	92.0706	7.67131
		O2	2007-11-01	3.75609	136.616	136.788	134.578	92.3501	7.45743
	MO Ozark BREA	M1	2007-12-01	6.0461	156.587	157.343	148.036	92.0913	7.84153
		M2	2007-12-01	6.9058	153.744	154.383	146.428	92.1537	7.79228
		M3	2007-12-01	6.56992	154.994	155.676	147.222	92.134	7.80731
		M4	2007-12-01	6.38746	155.52	156.226	147.492	92.1199	7.8187
		M5	2007-12-01	6.47544	155.36	156.055	147.45	92.1279	7.81194
	Mi-Fine Colonial Point	C1	2008-11-01	5.95777	108.421	108.458	107.97	92.534	7.34775
		C2	2008-11-01	5.59851	112.023	112.078	111.359	92.4971	7.37779
		C3	2008-11-01	5.63214	111.704	111.757	111.061	92.5008	7.37474
		C4	2008-11-01	5.71925	110.784	110.833	110.196	92.5099	7.36741
		C5	2008-11-01	5.79064	110.188	110.234	109.637	92.5177	7.36088
	NH Bartlett Forest	B1	2007-11-01	6.68234	136.401	136.526	134.769	93.0514	6.80231
		B2	2007-11-01	7.74378	130.66	130.737	129.639	93.201	6.67614
		B3	2007-11-01	7.36461	132.754	132.847	131.531	93.1518	6.71782
		B4	2007-11-01	7.19906	133.62	133.72	132.306	93.1291	6.73705
		B5	2007-11-01	6.98622	134.826	134.937	133.382	93.0981	6.76299
Meyer_2012	Matsch	Abandoned	2008-10-01	8.34844	155.762	156.186	150.269	93.0482	6.77401
		Meadow	2008-10-01	8.34844	155.762	156.186	150.269	93.0482	6.77401
		Pasture	2008-10-01	8.65659	155.144	155.547	149.888	93.0903	6.73824
	Stubai	Abandoned	2008-10-01	7.24463	160.038	160.572	152.983	93.1997	6.61157
		Meadow	2008-10-01	7.70035	158.697	159.186	152.149	93.2721	6.54916
		Pasture	2008-10-01	7.50307	159.311	159.819	152.547	93.2417	6.57545
Rasmussen_2018	ANpp	ANpp	2009-07-01	2.60307	-19.8183	-19.9118	-18.8867	91.3448	8.60365
	ANwf	ANwf	2009-07-01	1.54695	6.02531	5.92276	7.03551	91.2735	8.64116
	BSpp	BSpp	2009-07-01	2.69028	93.592	93.8191	91.2926	91.3499	8.53885
	BSrf	BSrf	2009-07-01	1.7356	16.5273	16.4337	17.4359	91.1901	8.72337
	BSwf	BSwf	2009-07-01	1.90359	8.12379	8.01872	9.14593	91.2133	8.70815
	GRpp	GRpp	2010-07-01	0.913279	-198.402	-198.652	-195.922	91.1697	8.79856
	GRwf	GRwf	2010-07-01	0.441828	-31.05	-31.2225	-29.3621	91.052	8.87335
Schrumpf_2013	Bugac	Bugac.1	2004-07-01	4.40348	182.046	184.148	159.709	91.6347	8.05676
	Carlow	Carlow.1	2004-07-01	4.48556	169.901	170.808	159.936	91.9317	7.83266
	Easter Bush	Easter Bush.1	2004-07-01	6.4618	168.345	168.929	162.019	91.8669	7.90979
	Gebesee	Gebesee.1	2004-07-01	6.42475	185.966	187.592	169.083	91.5098	8.21525
	Grignon	Grignon.1	2004-07-01	5.57259	174.022	175.54	157.918	91.6374	8.08499
	Hainich	Hainich.1	2004-07-01	6.51668	180.827	181.973	168.549	91.7554	7.99734
	Hesse	Hesse.1	2004-07-01	7.53706	171.661	172.396	163.296	92.1404	7.64144
	Laqueuille	Laqueuille.1	2004-07-01	6.68984	172.961	173.74	163.733	92.4379	7.32164
	Norunda	Norunda.1	2004-07-01	7.95596	116.42	116.446	116.155	91.4414	8.32738
	Sorø	Sorø.1	2004-07-01	6.92983	166.541	167.565	155.807	91.5661	8.18732
	Wetzstein	Wetzstein.1	2004-07-01	7.51822	187.571	188.419	178.165	91.98	7.77759

## Sheet: SOMic
entry_name	site_name	pro_name	date	soc_kgCm2	bulk_14c	HF_14c	LF_14c	HF_c_perc	LF_c_perc
Baisden_2002	China Hat	ChinaHat.1978	1978-07-01	2.94134	137.449	84.3608	415.776	82.875	13.9751
	Riverbank	Riverbank.1949	1949-07-01	2.24917	-27.3325	-28.1457	-21.6442	86.4435	11.072
		Riverbank.1997	1997-07-01	2.43019	146.359	147.248	144.113	77.6835	18.2533
Berhe_2012	Tennessee Valley	hollow comp	2004-07-01	3.10367	142.201	148.684	106.452	83.9065	13.0079
		plain comp	2004-07-01	3.47642	139.02	144.187	106.484	85.5583	11.6258
		slope comp	2004-07-01	3.05995	142.562	149.222	106.448	83.6868	13.192
		summit comp	2004-07-01	3.183	141.539	147.714	106.459	84.2898	12.6866
Harden_2002	Dinesen	DPPR2	1998-05-08	5.55194	178.573	186.888	140.564	81.1236	15.5143
Heckman_2010	Chiricahua Rhyolite	CHRY_composite	2006-07-01	2.53302	99.5475	97.9348	106.976	80.848	16.5833
	Flagstaff Basalt	FGBA_composite	2006-07-01	2.87742	106.846	106.145	109.861	78.7646	18.0704
	Mt. Lemmon Granite	MLGR_composite	2006-07-01	2.41518	109.504	111.653	101.007	79.2186	18.1096
Heckman_2018	AZ_Mollisol	Basalt	2008-07-01	3.14367	101.53	101.742	100.578	81.8283	15.4442
	HI_Andisol	WPL1204	2012-07-01	3.21092	119.614	127.903	63.0329	86.2983	11.6091
Lemke_2006	Solling	Solling_DO_F1	2004-07-29	5.77122	145.714	157.672	112.782	72.1559	23.0942
		Solling_DO_F2	2004-07-29	5.77122	145.714	157.672	112.782	72.1559	23.0942
		Solling_DO_F3	2004-07-29	5.77122	145.714	157.672	112.782	72.1559	23.0942
Lybrand_2017	Catalina CZO conifer	mixed conifer_convergent	2015-07-01	2.75255	93.1842	101.759	54.5613	81.058	16.5574
		mixed conifer_divergent	2015-07-01	2.75255	93.1842	101.759	54.5613	81.058	16.5574
	Catalina CZO desert	desert scrub_convergent	2015-07-01	3.15457	86.9117	92.5784	55.4652	83.9751	13.9596
		desert scrub_divergent	2015-07-01	3.15457	86.9117	92.5784	55.4652	83.9751	13.9596
	Catalina CZO ponderosa	ponderosa pine_convergent	2015-07-01	2.95025	91.7231	99.2996	54.5919	82.2804	15.4636
		ponderosa pine_divergent	2015-07-01	2.95025	91.7231	99.2996	54.5919	82.2804	15.4636
Marin-Spiotta_2008	Sierra de Cayey	10yr secondary forest	2001-07-01	4.16604	141.168	144.53	123.719	83.0761	14.6371
		20yr secondary forest	2001-07-01	3.98073	142.481	146.3	123.724	82.3101	15.3202
		30yr secondary forest	2001-07-01	4.07339	141.828	145.412	123.721	82.7017	14.9708
		80yr secondary forest	2001-07-01	4.21235	140.837	144.091	123.718	83.2572	14.4758
		Active pastures	2001-07-01	4.16097	136.578	138.313	124.166	87.28	10.4673
		Primary forest	2001-07-01	4.49014	138.828	141.49	123.712	84.2666	13.5779
McFarlane_2013	MA Harvard Forest	H1	2007-11-01	5.29395	108.939	98.4097	130.134	65.8685	28.8256
		H2	2007-11-01	5.28532	108.981	98.4467	130.134	65.8145	28.8723
		H3	2007-11-01	5.85628	106.248	96.03	130.148	69.0514	26.0759
		H4	2007-11-01	5.86343	106.215	96.0002	130.148	69.088	26.0444
		H5	2007-11-01	6.05541	105.321	95.2033	130.153	70.0374	25.2246
	MI-Coarse UMBS	60M	2007-11-01	3.00501	97.5626	85.0707	125.34	68.0378	27.1642
		C7	2007-11-01	3.02363	97.3794	84.9178	125.342	68.2284	26.9983
		D4	2007-11-01	3.03553	97.2626	84.8202	125.343	68.3489	26.8934
		G3	2007-11-01	3.02891	97.3276	84.8745	125.342	68.2819	26.9517
		O2	2007-11-01	3.06337	96.9902	84.5925	125.345	68.6274	26.651
	MO Ozark BREA	M1	2007-12-01	4.21921	141.14	161.715	74.5131	75.4722	21.2025
		M2	2007-12-01	4.30368	141.217	161.285	74.5163	75.937	20.7887
		M3	2007-12-01	4.21194	141.132	161.752	74.5128	75.4314	21.2389
		M4	2007-12-01	4.24898	141.169	161.564	74.5142	75.6381	21.0548
		M5	2007-12-01	4.34269	141.245	161.085	74.5178	76.1457	20.603
	Mi-Fine Colonial Point	C1	2008-11-01	3.72013	90.3302	80.0175	121.047	73.8148	22.1109
		C2	2008-11-01	3.79806	89.6756	79.4318	121.053	74.3328	21.6616
		C3	2008-11-01	3.65829	90.8542	80.4856	121.043	73.3881	22.481
		C4	2008-11-01	3.81007	89.5753	79.3419	121.054	74.4108	21.594
		C5	2008-11-01	3.62436	91.1434	80.7438	121.04	73.1479	22.6895
	NH Bartlett Forest	B1	2007-11-01	5.53014	103.593	92.7178	127.718	67.9221	26.9823
		B2	2007-11-01	5.48428	103.818	92.9111	127.717	67.6621	27.2065
		B3	2007-11-01	5.42334	104.119	93.1686	127.716	67.3098	27.5103
		B4	2007-11-01	5.40586	104.205	93.2426	127.715	67.2073	27.5986
		B5	2007-11-01	5.4292	104.09	93.1438	127.716	67.344	27.4808
Meyer_2012	Matsch	Abandoned	2008-10-01	9.53489	100.49	94.9672	119.566	75.5948	19.2314
		Meadow	2008-10-01	9.53489	100.49	94.9672	119.566	75.5948	19.2314
		Pasture	2008-10-01	9.53489	100.49	94.9672	119.566	75.5948	19.2314
	Stubai	Abandoned	2008-10-01	6.54068	117.177	119.827	108.823	76.0718	18.8842
		Meadow	2008-10-01	6.54068	117.177	119.827	108.823	76.0718	18.8842
		Pasture	2008-10-01	6.54068	117.177	119.827	108.823	76.0718	18.8842
Rasmussen_2018	ANpp	ANpp	2009-07-01	1.82664	-16.4202	-27.6762	132.506	92.3397	6.61298
	ANwf	ANwf	2009-07-01	1.34107	-1.74789	-15.6462	130.726	89.7501	8.82044
	BSpp	BSpp	2009-07-01	2.33752	56.4113	50.9642	92.1154	85.8597	12.1218
	BSrf	BSrf	2009-07-01	1.32643	4.6771	-14.3363	139.28	86.7939	11.3824
	BSwf	BSwf	2009-07-01	1.39518	1.33168	-17.0751	139.454	87.4255	10.8359
	GRpp	GRpp	2010-07-01	1.39496	-244.702	-265.965	139.042	94.3895	5.06831
	GRwf	GRwf	2010-07-01	1.19834	-234.446	-257.474	143.114	93.796	5.49754
Schrumpf_2013	Bugac	Bugac.1	2004-07-01	5.01674	163.33	181.916	94.4582	77.6817	17.7443
	Carlow	Carlow.1	2004-07-01	3.28532	137.816	144.08	110.177	81.2802	13.6616
	Easter Bush	Easter Bush.1	2004-07-01	4.44594	141.663	144.849	130.831	76.9445	18.2899
	Gebesee	Gebesee.1	2004-07-01	6.43282	154.977	165.236	107.257	81.5048	13.5862
	Grignon	Grignon.1	2004-07-01	5.64137	144.284	152.235	107.328	81.6137	13.534
	Hainich	Hainich.1	2004-07-01	7.28417	141.755	149.28	113.497	77.7213	18.5063
	Hesse	Hesse.1	2004-07-01	7.05884	135.996	139.289	126.595	72.7665	22.7733
	Laqueuille	Laqueuille.1	2004-07-01	5.84778	138.24	144.025	119.194	76.0231	18.9522
	Norunda	Norunda.1	2004-07-01	6.61742	90.2892	74.5246	124.953	67.6539	26.9763
	Sorø	Sorø.1	2004-07-01	7.18471	129.042	132.233	120.631	71.0564	24.3286
	Wetzstein	Wetzstein.1	2004-07-01	7.15545	149.577	155.246	134.697	71.0974	24.0761

## Sheet: CORPSE
entry_name	site_name	pro_name	date	soc_kgCm2	bulk_14c	HF_14c	LF_14c	HF_c_perc	LF_c_perc
Baisden_2002	China Hat	ChinaHat.1978	1978-07-01	1.43694	284.538	120.995	402.216	41.6918	57.6308
	Riverbank	Riverbank.1949	1949-07-01	3.34324	-392.271	-425.843	-106.389	89.3915	10.3003
		Riverbank.1997	1997-07-01	2.46633	-107.931	-271.277	156.761	61.6957	37.7148
Berhe_2012	Tennessee Valley	hollow comp	2004-07-01	2.88282	108.535	71.0045	156.453	55.7867	43.8015
		plain comp	2004-07-01	3.14254	103.347	66.4547	157.027	59.0119	40.6153
		slope comp	2004-07-01	2.84784	109.333	71.7702	156.378	55.3055	44.2769
		summit comp	2004-07-01	2.94349	107.172	69.7063	156.585	56.5931	43.0047
Harden_2002	Dinesen	DPPR2	1998-05-08	7.08615	168.207	121.715	209.596	46.8546	52.8515
Heckman_2010	Chiricahua Rhyolite	CHRY_composite	2006-07-01	3.6865	85.1763	15.0035	164.463	52.9182	46.872
	Flagstaff Basalt	FGBA_composite	2006-07-01	2.73665	106.558	45.0765	167.821	49.6589	49.9662
	Mt. Lemmon Granite	MLGR_composite	2006-07-01	2.40043	113.812	48.0666	164.912	43.5197	56.1748
Heckman_2018	AZ_Mollisol	Basalt	2008-07-01	2.99141	93.0642	38.0301	158.88	54.3202	45.4625
	HI_Andisol	WPL1204	2012-07-01	2.28083	50.9799	37.4615	81.3794	68.9389	30.5995
Lemke_2006	Solling	Solling_DO_F1	2004-07-29	16.554	121.607	2.62944	171.533	29.5056	70.3611
		Solling_DO_F2	2004-07-29	16.554	121.607	2.62944	171.533	29.5056	70.3611
		Solling_DO_F3	2004-07-29	16.554	121.607	2.62944	171.533	29.5056	70.3611
Lybrand_2017	Catalina CZO conifer	mixed conifer_convergent	2015-07-01	3.07082	71.0149	30.325	118.523	53.6451	46.08
		mixed conifer_divergent	2015-07-01	3.07082	71.0149	30.325	118.523	53.6451	46.08
	Catalina CZO desert	desert scrub_convergent	2015-07-01	3.33686	56.2665	18.2162	116.561	61.137	38.6272
		desert scrub_divergent	2015-07-01	3.33686	56.2665	18.2162	116.561	61.137	38.6272
	Catalina CZO ponderosa	ponderosa pine_convergent	2015-07-01	3.3623	63.6145	23.0749	118.602	57.3741	42.377
		ponderosa pine_divergent	2015-07-01	3.3623	63.6145	23.0749	118.602	57.3741	42.377
Marin-Spiotta_2008	Sierra de Cayey	10yr secondary forest	2001-07-01	4.62262	67.9242	32.9276	152.941	70.6611	28.9186
		20yr secondary forest	2001-07-01	4.4239	70.5968	34.6326	152.925	69.4105	30.1484
		30yr secondary forest	2001-07-01	4.52575	69.2057	33.7453	152.933	70.0658	29.504
		80yr secondary forest	2001-07-01	4.66935	67.3199	32.5419	152.946	70.9391	28.6452
		Active pastures	2001-07-01	4.8481	54.5136	23.5916	150.275	75.428	24.1835
		Primary forest	2001-07-01	4.92916	64.1168	30.4968	152.98	72.3847	27.2238
McFarlane_2013	MA Harvard Forest	H1	2007-11-01	12.463	99.3644	33.4042	133.66	34.1267	65.6092
		H2	2007-11-01	12.4118	99.7381	33.7235	133.7	33.8877	65.8469
		H3	2007-11-01	14.9098	83.0455	20.4011	131.82	43.7081	56.0764
		H4	2007-11-01	14.9341	82.8975	20.2897	131.802	43.7881	55.9967
		H5	2007-11-01	15.5503	79.2304	17.5525	131.352	45.7368	54.0577
	MI-Coarse UMBS	60M	2007-11-01	3.37913	137.842	72.2836	144.136	8.55911	91.0203
		C7	2007-11-01	3.70479	130.559	62.4485	143.655	15.9536	83.6658
		D4	2007-11-01	3.83868	127.557	58.8955	143.454	18.6373	80.9965
		G3	2007-11-01	3.76773	129.146	60.7467	143.561	17.2385	82.3879
		O2	2007-11-01	4.07816	122.258	53.1186	143.094	23.007	76.6501
	MO Ozark BREA	M1	2007-12-01	4.48322	114.981	111.859	118.288	47.1381	52.2242
		M2	2007-12-01	4.57022	114.526	110.786	118.498	47.9914	51.3855
		M3	2007-12-01	4.47548	115.021	111.955	118.269	47.0605	52.3005
		M4	2007-12-01	4.5145	114.819	111.471	118.363	47.4488	51.9188
		M5	2007-12-01	4.60866	114.321	110.317	118.591	48.3578	51.0254
	Mi-Fine Colonial Point	C1	2008-11-01	6.15655	83.4499	21.1699	138.143	46.6586	53.1089
		C2	2008-11-01	6.30388	81.2467	19.5085	137.94	47.7744	51.9989
		C3	2008-11-01	6.03295	85.3395	22.6059	138.314	45.682	54.0802
		C4	2008-11-01	6.32583	80.9228	19.2653	137.91	47.9364	51.8378
		C5	2008-11-01	5.96228	86.4373	23.4454	138.412	45.1062	54.6529
	NH Bartlett Forest	B1	2007-11-01	10.8856	91.9127	27.466	138.913	42.0638	57.6204
		B2	2007-11-01	10.7328	93.1955	28.41	139.002	41.3088	58.3703
		B3	2007-11-01	10.5198	95.0144	29.7605	139.126	40.2217	59.4503
		B4	2007-11-01	10.4565	95.5628	30.1706	139.164	39.8899	59.7798
		B5	2007-11-01	10.5409	94.8333	29.6253	139.114	40.3308	59.3419
Meyer_2012	Matsch	Abandoned	2008-10-01	14.4524	89.6728	29.6891	153.854	51.5269	48.1663
		Meadow	2008-10-01	14.4524	89.6728	29.6891	153.854	51.5269	48.1663
		Pasture	2008-10-01	14.4524	89.6728	29.6891	153.854	51.5269	48.1663
	Stubai	Abandoned	2008-10-01	9.09463	102.274	49.2309	155.588	49.8766	49.7176
		Meadow	2008-10-01	9.09463	102.274	49.2309	155.588	49.8766	49.7176
		Pasture	2008-10-01	9.09463	102.274	49.2309	155.588	49.8766	49.7176
Rasmussen_2018	ANpp	ANpp	2009-07-01	0.261656	27.2397	-4.62013	103.976	70.4865	29.1925
	ANwf	ANwf	2009-07-01	0.139059	62.2976	19.1329	102.179	47.708	51.7066
	BSpp	BSpp	2009-07-01	0.717822	117.428	119.743	115.846	45.6194	53.9223
	BSrf	BSrf	2009-07-01	0.20975	120.388	80.6598	138.926	31.348	68.2381
	BSwf	BSwf	2009-07-01	0.232712	113.77	72.0508	139.356	37.6508	61.9841
	GRpp	GRpp	2010-07-01	0.0377821	120.014	128.879	114.909	38.3445	61.0872
	GRwf	GRwf	2010-07-01	0.0351351	124.921	136.363	120.928	28.0309	71.3
Schrumpf_2013	Bugac	Bugac.1	2004-07-01	7.13605	126.684	95.8375	160.51	51.8712	47.6914
	Carlow	Carlow.1	2004-07-01	3.05711	121.442	89.2062	151.581	47.8564	51.5974
	Easter Bush	Easter Bush.1	2004-07-01	4.60894	132.593	86.3823	175.052	47.6142	51.9811
	Gebesee	Gebesee.1	2004-07-01	9.02564	113.317	71.2839	165.854	55.2823	44.3414
	Grignon	Grignon.1	2004-07-01	8.25324	103.118	61.4021	157.182	56.2074	43.4128
	Hainich	Hainich.1	2004-07-01	8.93219	93.1755	49.4672	163.935	61.6102	38.0461
	Hesse	Hesse.1	2004-07-01	9.25217	105.054	54.2568	167.34	54.8869	44.7487
	Laqueuille	Laqueuille.1	2004-07-01	8.68053	106.241	55.0729	165.85	53.5648	46.0019
	Norunda	Norunda.1	2004-07-01	10.5168	83.5199	24.5211	129.749	43.8397	55.8535
	Sorø	Sorø.1	2004-07-01	9.93103	107.309	53.5434	165.747	51.9071	47.7862
	Wetzstein	Wetzstein.1	2004-07-01	9.78219	120.739	62.1033	182.61	51.142	48.4943

## Sheet: MEND
entry_name	site_name	pro_name	date	soc_kgCm2	bulk_14c	HF_14c	LF_14c	HF_c_perc	LF_c_perc
Baisden_2002	China Hat	ChinaHat.1978	1978-07-01	0.794866	171.578	158.297	177.292	31.5119	68.3226
	Riverbank	Riverbank.1949	1949-07-01	0.93537	-27.6761	-20.9832	-30.3416	28.3661	71.4798
		Riverbank.1997	1997-07-01	1.30017	113.557	156.842	95.1949	29.7382	70.144
Berhe_2012	Tennessee Valley	hollow comp	2004-07-01	1.17458	143.597	182.671	131.058	24.3284	75.5853
		plain comp	2004-07-01	0.749456	163.458	172.724	159.814	28.7455	71.1191
		slope comp	2004-07-01	0.189588	106.793	113.803	101.73	42.4136	57.0394
		summit comp	2004-07-01	0.296164	131.342	133.566	130.171	37.7338	61.9198
Harden_2002	Dinesen	DPPR2	1998-05-08	0.678414	195.453	195.356	195.85	31.0636	68.5908
Heckman_2010	Chiricahua Rhyolite	CHRY_composite	2006-07-01	0.317528	143.558	160.315	132.414	40.287	59.5425
	Flagstaff Basalt	FGBA_composite	2006-07-01	0.526884	150.824	172.513	138.973	35.6071	64.196
	Mt. Lemmon Granite	MLGR_composite	2006-07-01	0.383396	158.65	180.856	143.224	41.2715	58.5605
Heckman_2018	AZ_Mollisol	Basalt	2008-07-01	1.06836	105.176	154.944	85.7224	28.1068	71.8041
	HI_Andisol	WPL1204	2012-07-01
Lemke_2006	Solling	Solling_DO_F1	2004-07-29
		Solling_DO_F2	2004-07-29
		Solling_DO_F3	2004-07-29
Lybrand_2017	Catalina CZO conifer	mixed conifer_convergent	2015-07-01	0.328393	106.723	126.836	92.2319	42.4091	57.1287
		mixed conifer_divergent	2015-07-01	0.358362	111.174	130.86	97.558	41.4454	58.1323
	Catalina CZO desert	desert scrub_convergent	2015-07-01	0.6411	115.412	142.606	100.994	34.8864	64.8843
		desert scrub_divergent	2015-07-01	0.6411	115.412	142.606	100.994	34.8864	64.8843
	Catalina CZO ponderosa	ponderosa pine_convergent	2015-07-01	0.303873	102.104	122.818	86.5982	43.3022	56.1971
		ponderosa pine_divergent	2015-07-01	0.328393	106.723	126.836	92.2319	42.4091	57.1287
Marin-Spiotta_2008	Sierra de Cayey	10yr secondary forest	2001-07-01	0.56782	162.038	176.041	151.642	42.75	57.1212
		20yr secondary forest	2001-07-01	0.56782	162.038	176.041	151.642	42.75	57.1212
		30yr secondary forest	2001-07-01	0.56782	162.038	176.041	151.642	42.75	57.1212
		80yr secondary forest	2001-07-01	0.56782	162.038	176.041	151.642	42.75	57.1212
		Active pastures	2001-07-01	0.56782	162.038	176.041	151.642	42.75	57.1212
		Primary forest	2001-07-01	0.56782	162.038	176.041	151.642	42.75	57.1212
McFarlane_2013	MA Harvard Forest	H1	2007-11-01	0.241636	123.696	126.484	121.314	46.2281	51.2583
		H2	2007-11-01	0.206684	122.837	124.738	121.234	46.0421	50.9714
		H3	2007-11-01	0.206284	122.827	124.718	121.234	46.0369	50.9702
		H4	2007-11-01
		H5	2007-11-01	0.173948	122.111	123.109	121.316	45.2932	51.0847
	MI-Coarse UMBS	60M	2007-11-01	0.14652	113.602	116.903	111.056	44.276	53.7657
		C7	2007-11-01
		D4	2007-11-01
		G3	2007-11-01	0.145901	113.149	117.384	109.453	46.7736	51.2748
		O2	2007-11-01
	MO Ozark BREA	M1	2007-12-01	0.317098	94.2903	95.7244	93.6067	40.2816	59.0868
		M2	2007-12-01	0.194971	73.5137	81.2999	65.103	52.1201	46.862
		M3	2007-12-01	0.169082	71.6718	77.2444	65.9281	51.2309	47.6058
		M4	2007-12-01	0.187157	74.0687	79.038	69.5756	48.3375	50.6088
		M5	2007-12-01	0.171018	72.0001	77.342	66.6592	50.5638	48.2865
	Mi-Fine Colonial Point	C1	2008-11-01	0.226372				38.8824	59.8252
		C2	2008-11-01	0.629637	128.953	140.748	124.349	28.5219	71.0256
		C3	2008-11-01	0.512998	134.107	139.117	132.09	30.5937	68.8494
		C4	2008-11-01	0.424566				32.4962	66.8285
		C5	2008-11-01	0.263961				37.3017	61.5964
	NH Bartlett Forest	B1	2007-11-01	0.224053	119.916	122.445	117.668	46.975	50.2551
		B2	2007-11-01	0.265033	120.964	124.467	117.874	46.8163	50.8713
		B3	2007-11-01	0.278725	121.325	125.151	117.964	46.728	51.081
		B4	2007-11-01	0.235345	120.199	122.999	117.714	46.9501	50.4229
		B5	2007-11-01	0.296081	121.79	126.024	118.091	46.5965	51.3493
Meyer_2012	Matsch	Abandoned	2008-10-01	1.59768	134.868	138.855	133.827	24.1697	75.2524
		Meadow	2008-10-01	1.59768	134.868	138.855	133.827	24.1697	75.2524
		Pasture	2008-10-01	1.59768	134.868	138.855	133.827	24.1697	75.2524
	Stubai	Abandoned	2008-10-01	0.357221	103.92	108.249	101.357	40.4142	57.9713
		Meadow	2008-10-01	0.357221	103.92	108.249	101.357	40.4142	57.9713
		Pasture	2008-10-01	0.357221	103.92	108.249	101.357	40.4142	57.9713
Rasmussen_2018	ANpp	ANpp	2009-07-01	0.0665932	84.5644	112.578	70.2664	33.9371	65.3112
	ANwf	ANwf	2009-07-01	0.0794827	72.7794	104.043	58.5073	31.3006	67.7315
	BSpp	BSpp	2009-07-01	0.303983	131.968	163.1	114.638	36.0652	63.6625
	BSrf	BSrf	2009-07-01	0.108113	101.264	132.673	84.5178	34.8924	63.6452
	BSwf	BSwf	2009-07-01	0.138577	82.3767	115.986	66.2189	32.2431	66.8008
	GRpp	GRpp	2010-07-01
	GRwf	GRwf	2010-07-01
Schrumpf_2013	Bugac	Bugac.1	2004-07-01	17.7792	23.3308	13.1551	24.631	11.4287	88.5515
	Carlow	Carlow.1	2004-07-01	8.33558	23.2936	17.0288	24.4406	15.7448	84.2276
	Easter Bush	Easter Bush.1	2004-07-01	0.201177	128.974	133.099	126.916	38.3669	59.7122
	Gebesee	Gebesee.1	2004-07-01	6.09629	57.8278	190.8	44.6986	8.94496	90.9441
	Grignon	Grignon.1	2004-07-01	16.9013	24.1826	43.7207	22.0855	9.58647	90.3828
	Hainich	Hainich.1	2004-07-01	0.354499	122.893	121.909	124.06	33.5712	64.7863
	Hesse	Hesse.1	2004-07-01
	Laqueuille	Laqueuille.1	2004-07-01	0.199023	106.879	109.691	105.321	38.3296	58.1765
	Norunda	Norunda.1	2004-07-01
	Sorø	Sorø.1	2004-07-01	0.321333	115.086	115.914	115.138	34.9174	62.907
	Wetzstein	Wetzstein.1	2004-07-01	0.482568	137.278	151.73	123.565	48.9638	49.5641
