# Supplementary material for: Radiocarbon analysis reveals underestimation of soil organic carbon persistence in new-generation soil models
Source: Copernicus journal article supplement (doi:10.5194/gmd-2023-242), 2024-01-19

(a) Total SOC stocks

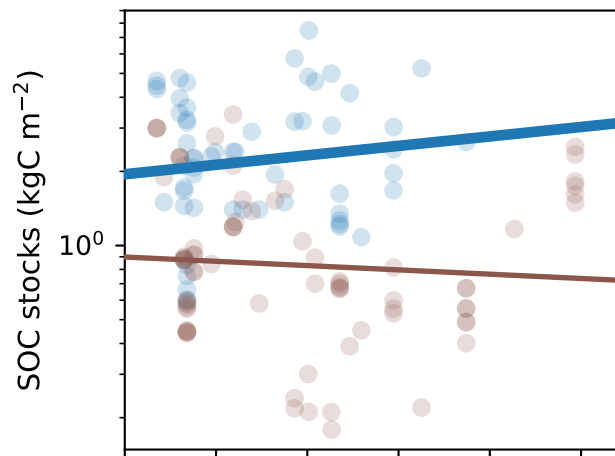

(b) POM contribution

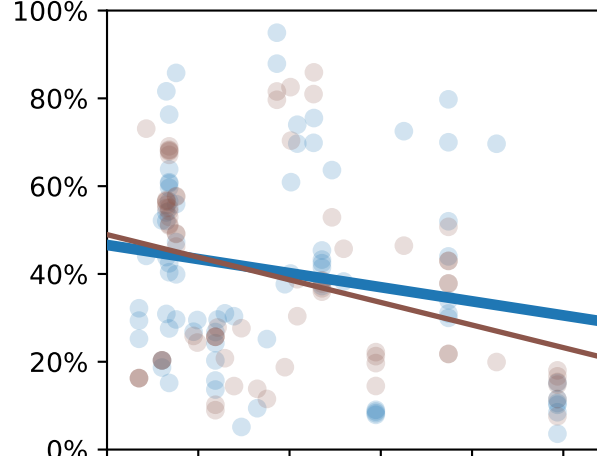

(c) MAOM contribution

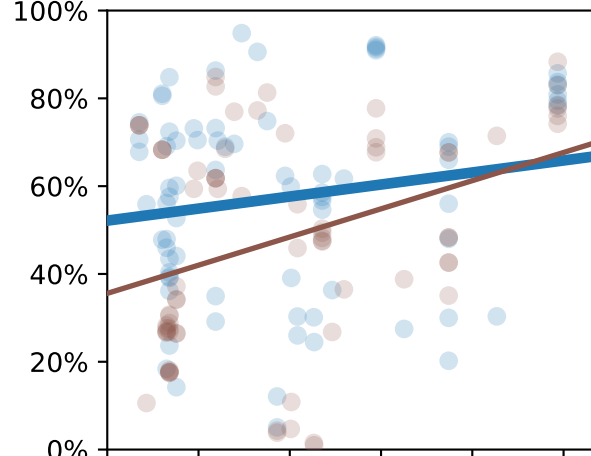(d) Bulk SOC  $\Delta^{14}\text{C}$ 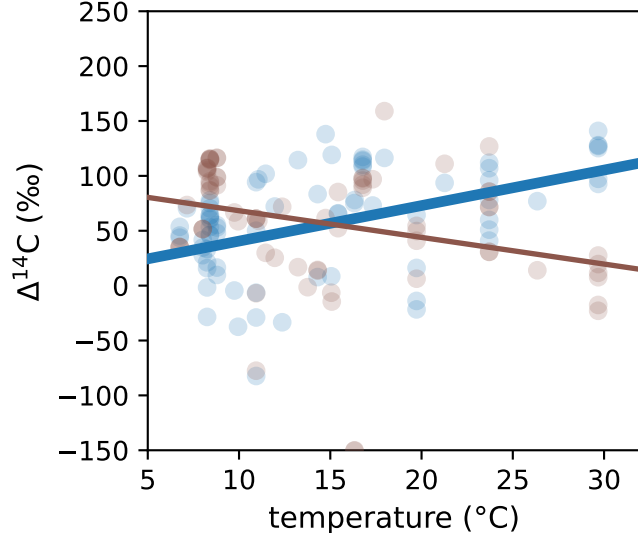(e) POM  $\Delta^{14}\text{C}$ 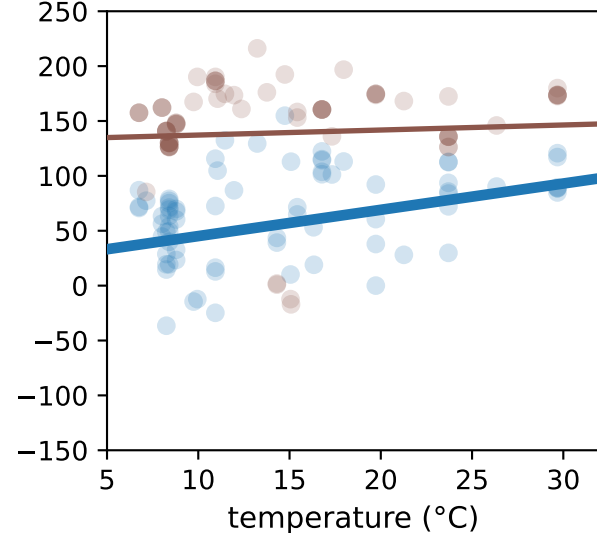(f) MAOM  $\Delta^{14}\text{C}$ 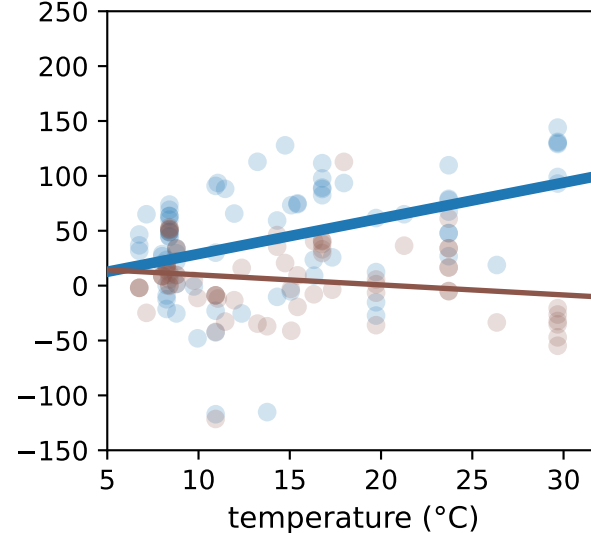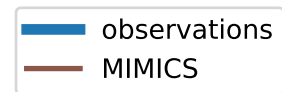

Supplement: Supplementary file 284 [file gmd-2023-242-supplement.zip]
