# Supplementary figures and images for: Radiocarbon analysis reveals underestimation of soil organic carbon persistence in new-generation soil models (part 1 of 4)
Source: Copernicus journal article supplement (doi:10.5194/gmd-2023-242), 2024-01-19

SOMic  
Marin-Spiotta\_2008, Sierra de Cayey, 30yr secondary forest

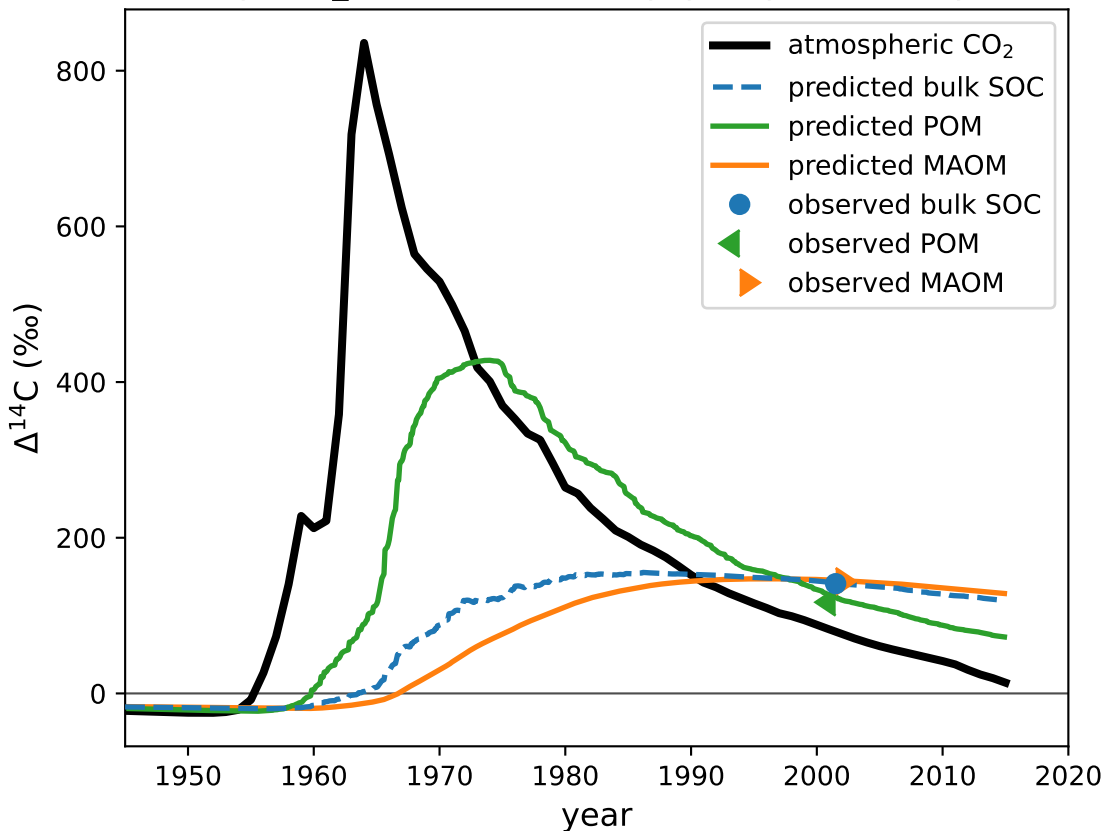

Supplement: Supplementary file 1 [file gmd-2023-242-supplement.zip]

MEND  
Schrumpf\_2013, Easter Bush, Easter Bush.1

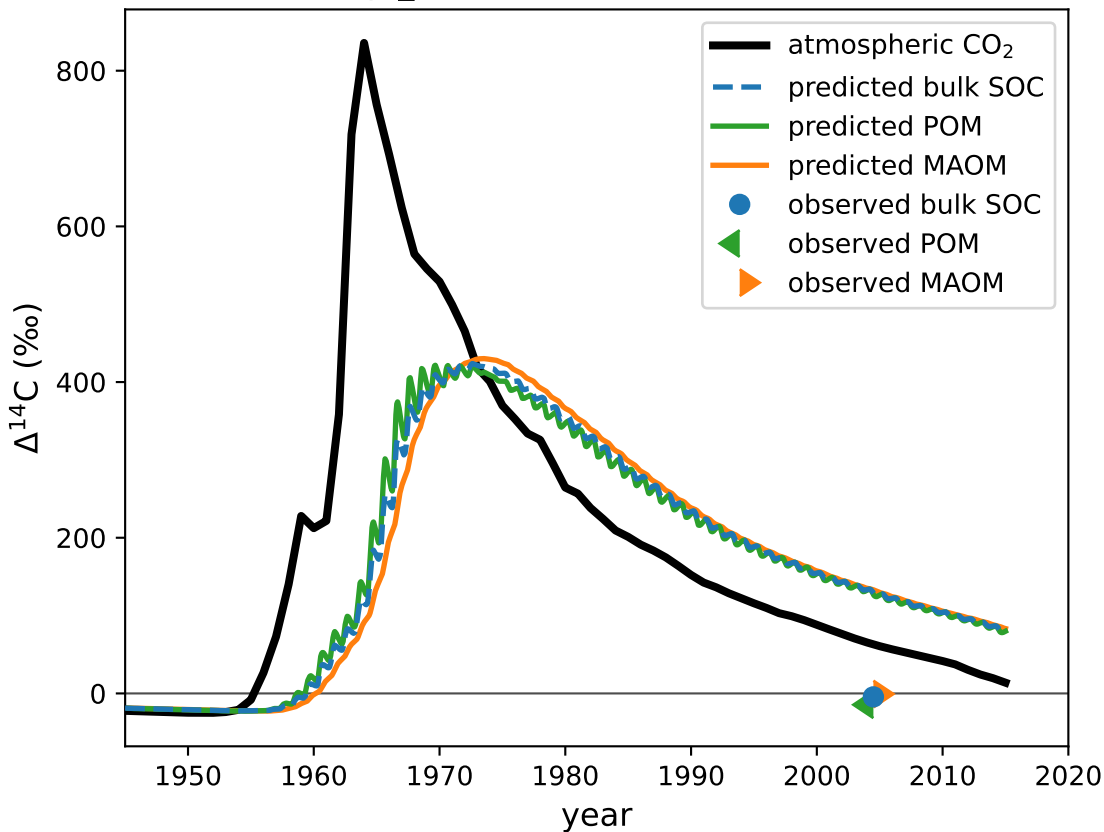

Supplement: Supplementary file 2 [file gmd-2023-242-supplement.zip]

MIMICS  
Schrumpf\_2013, Gebesee, Gebesee.1

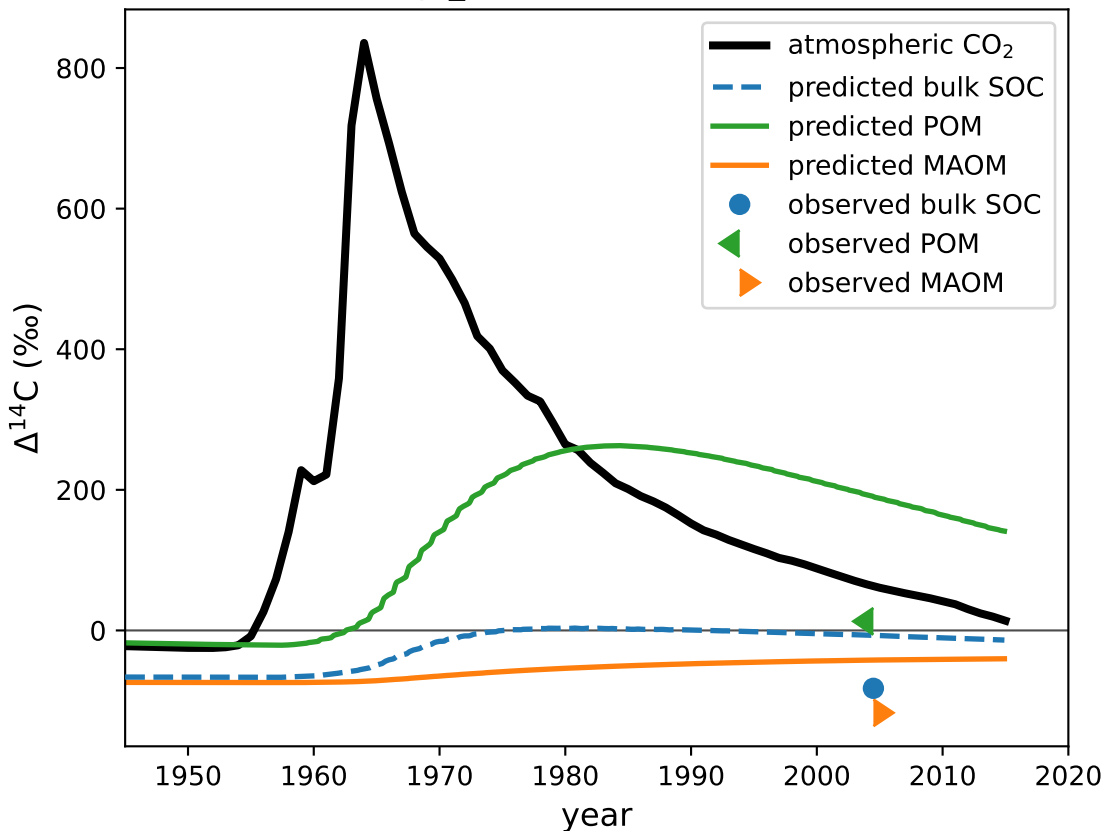

Supplement: Supplementary file 3 [file gmd-2023-242-supplement.zip]

MIMICS  
Meyer\_2012, Stubai, Abandoned

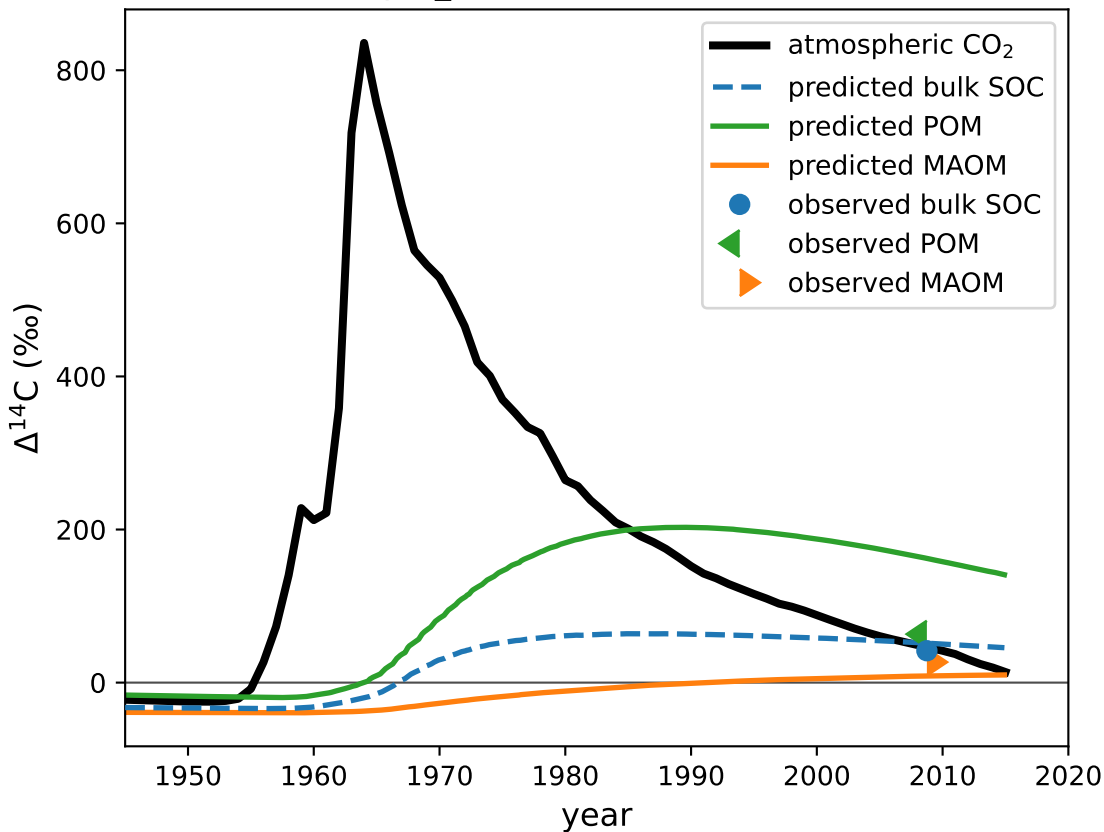

Supplement: Supplementary file 4 [file gmd-2023-242-supplement.zip]

Millennial  
McFarlane\_2013, MO Ozark BREA, M3

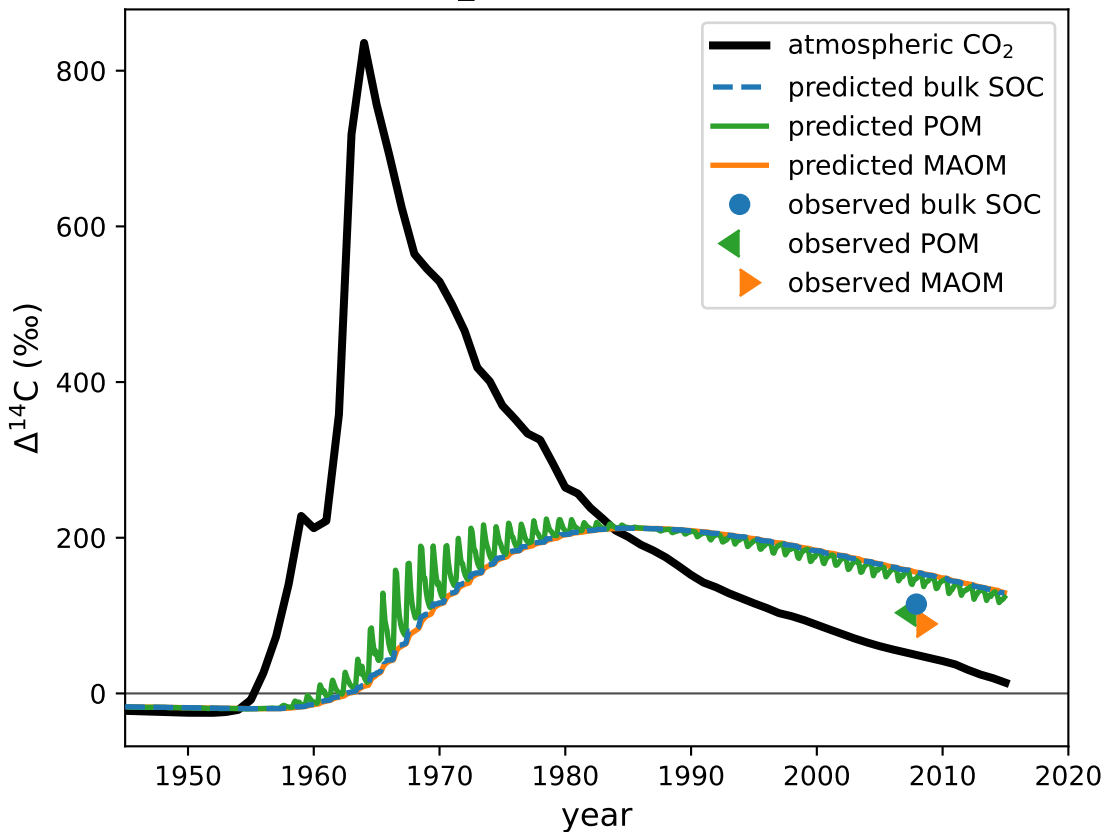

Supplement: Supplementary file 5 [file gmd-2023-242-supplement.zip]

CORPSE  
Meyer\_2012, Stubai, Pasture

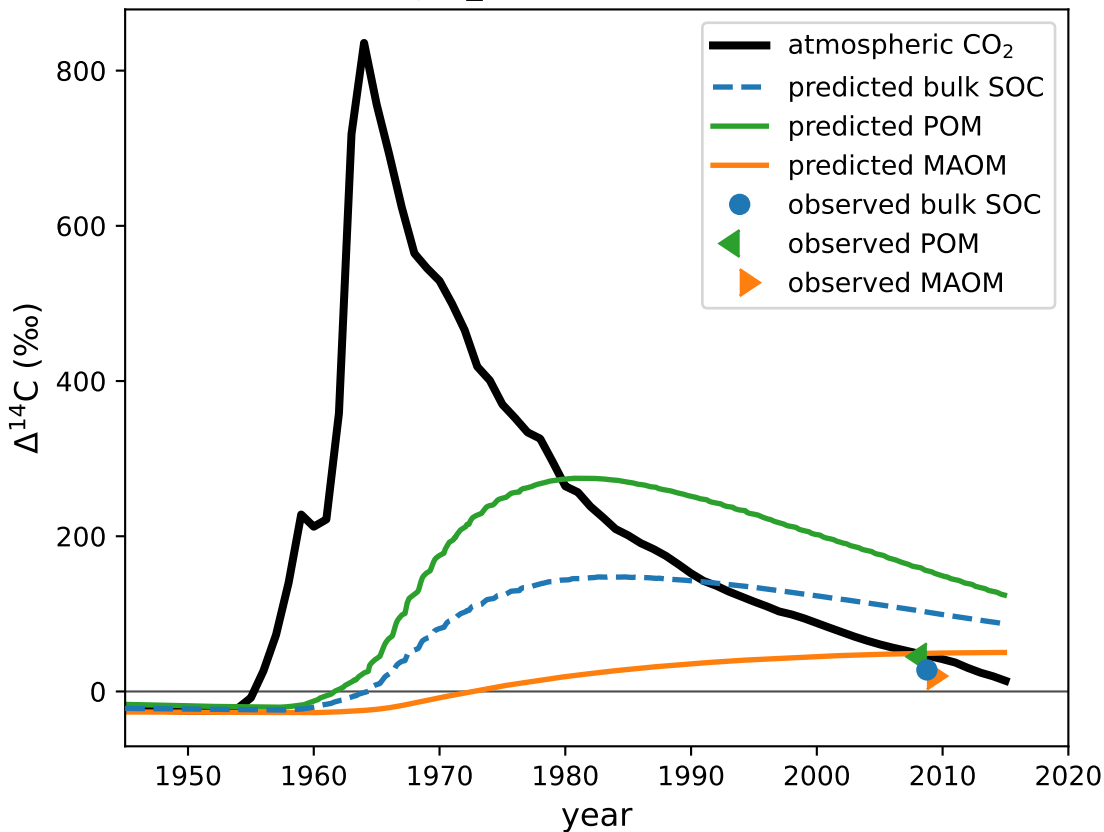

Supplement: Supplementary file 6 [file gmd-2023-242-supplement.zip]

SOMic

Lybrand\_2017, Catalina CZO ponderosa, ponderosa pine\_convergen

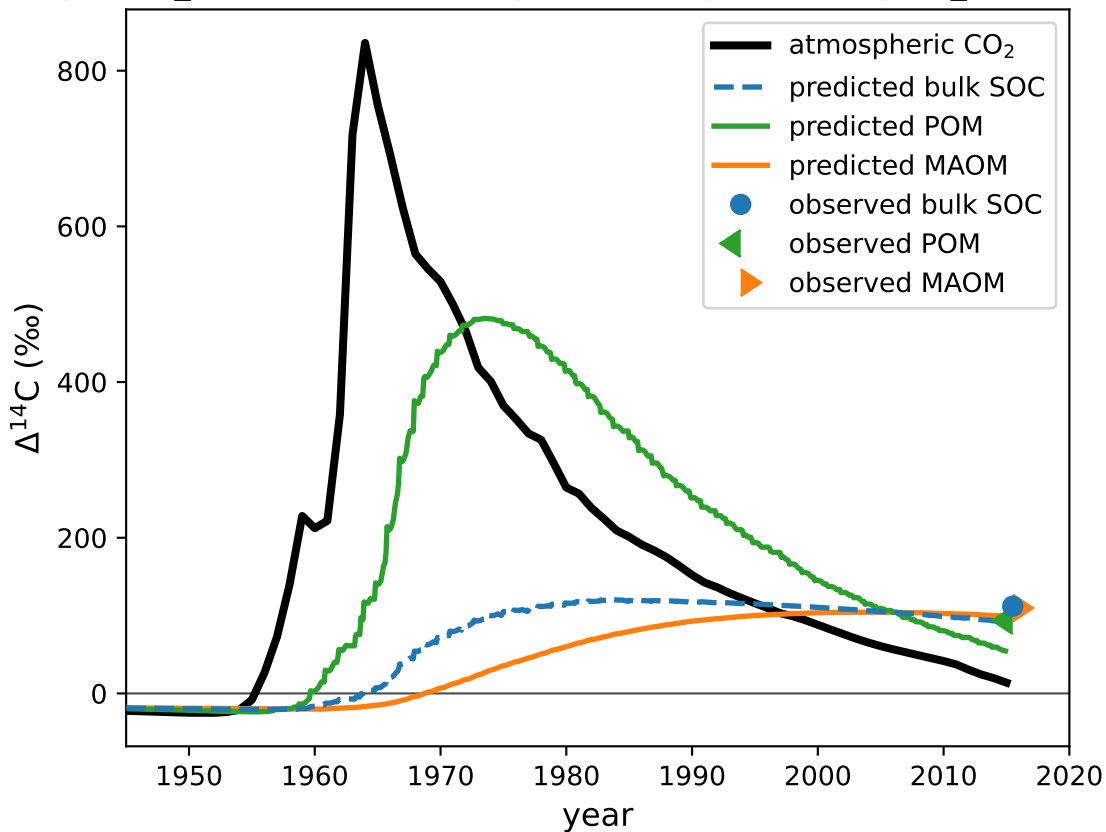

Supplement: Supplementary file 7 [file gmd-2023-242-supplement.zip]

Millennial  
McFarlane\_2013, NH Bartlett Forest, B1

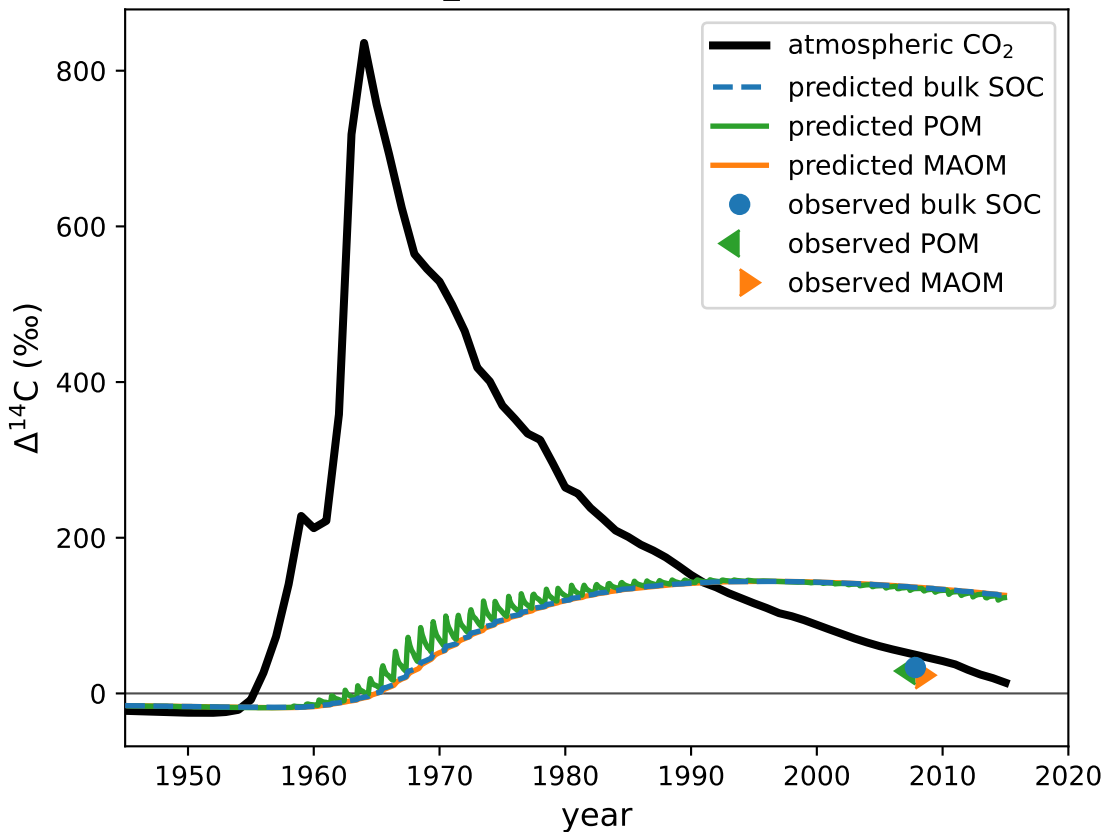

Supplement: Supplementary file 8 [file gmd-2023-242-supplement.zip]

MIMICS  
Meyer\_2012, Matsch, Meadow

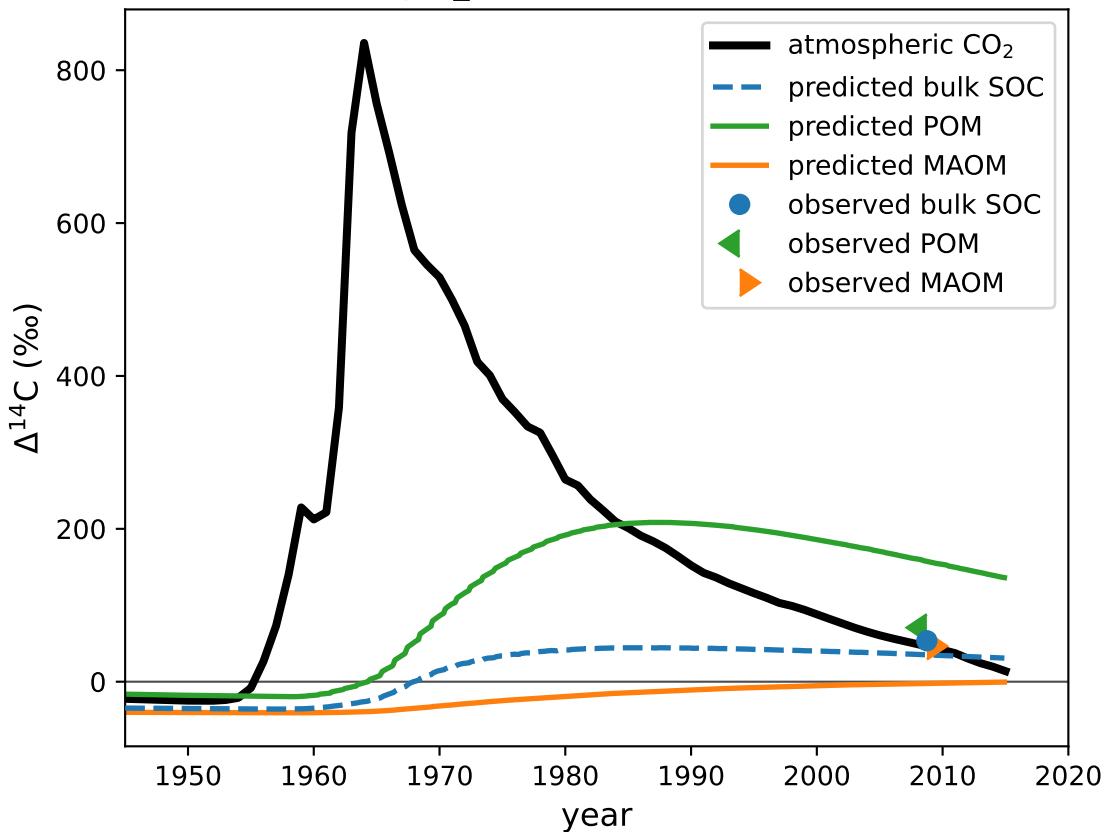

Supplement: Supplementary file 9 [file gmd-2023-242-supplement.zip]

MIMICS  
McFarlane\_2013, MI-Coarse UMBS, 60M

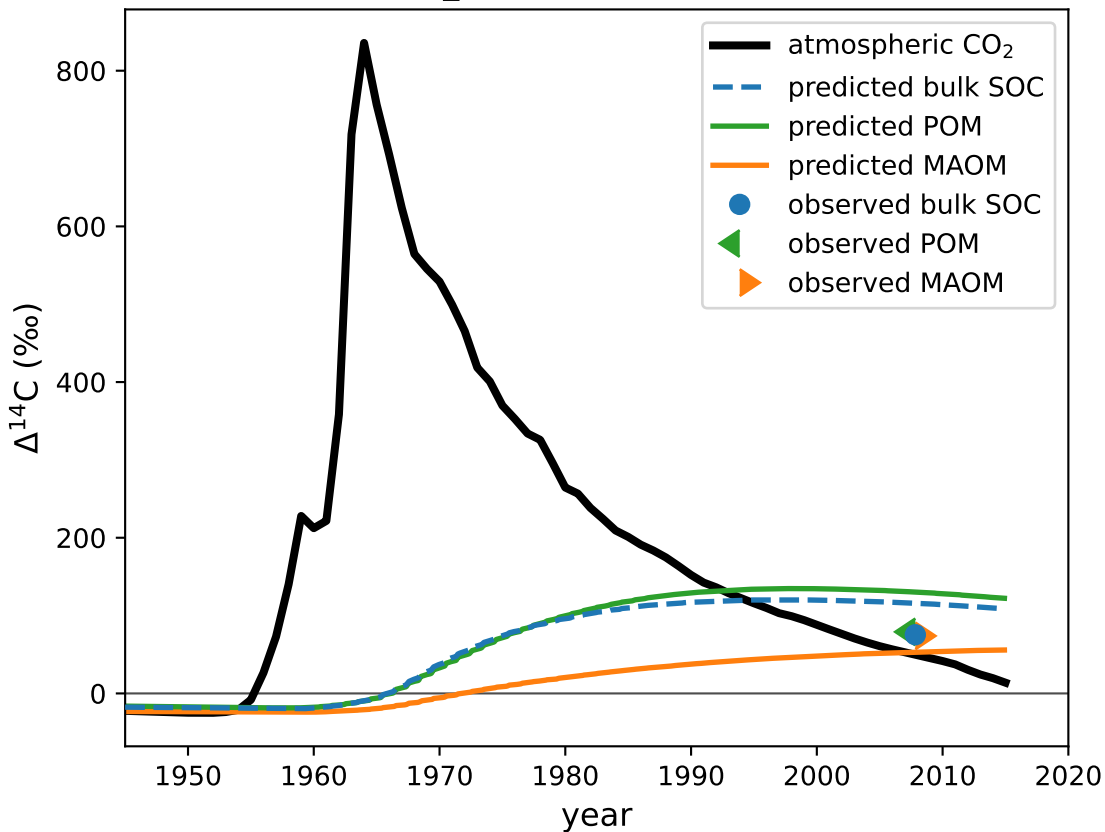

Supplement: Supplementary file 10 [file gmd-2023-242-supplement.zip]

Millennial  
Baisden\_2002, Riverbank, Riverbank.1997

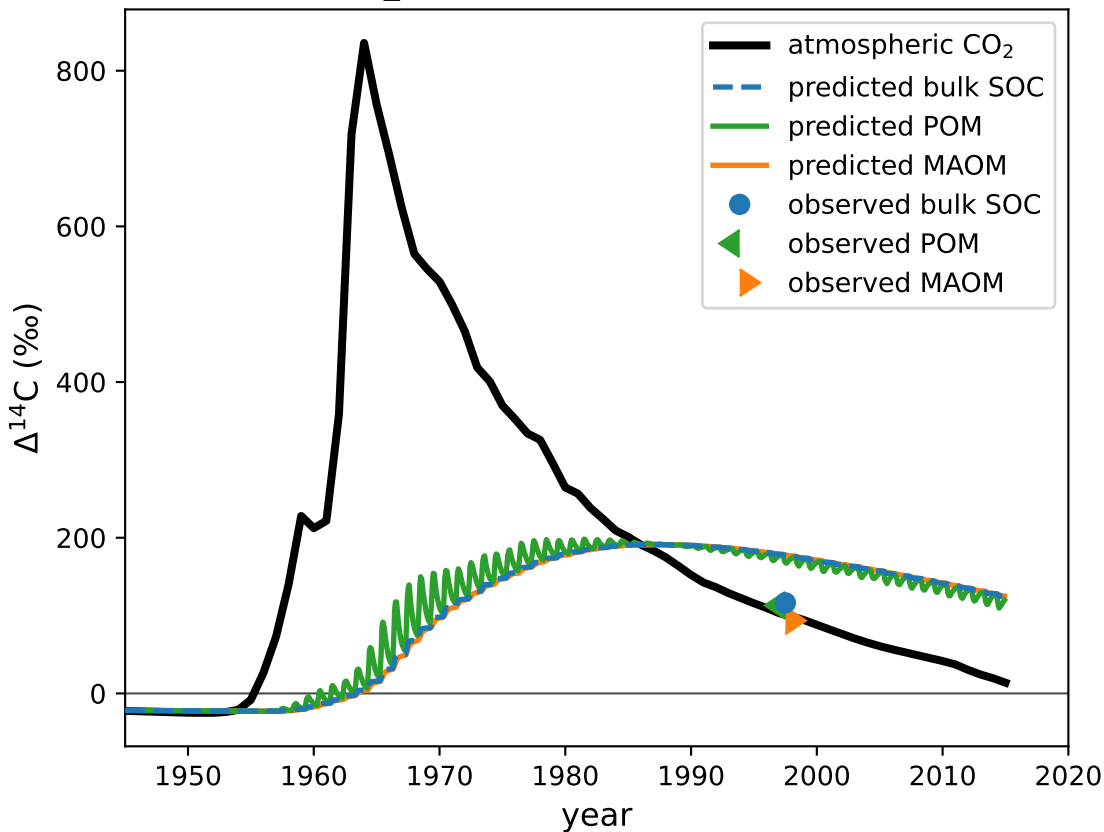

Supplement: Supplementary file 11 [file gmd-2023-242-supplement.zip]

SOMic  
Berhe\_2012, Tennessee Valley, summit comp

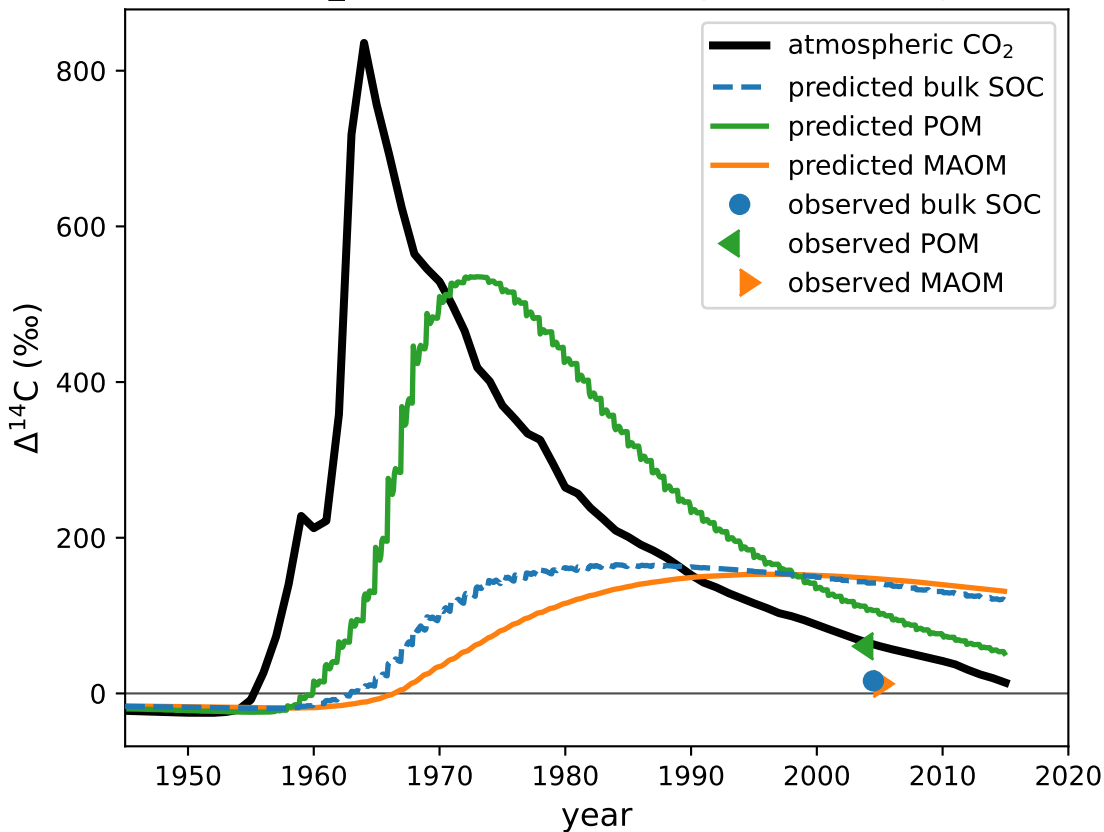

Supplement: Supplementary file 12 [file gmd-2023-242-supplement.zip]

SOMic  
Schrumpf\_2013, Sorø, Sorø.1

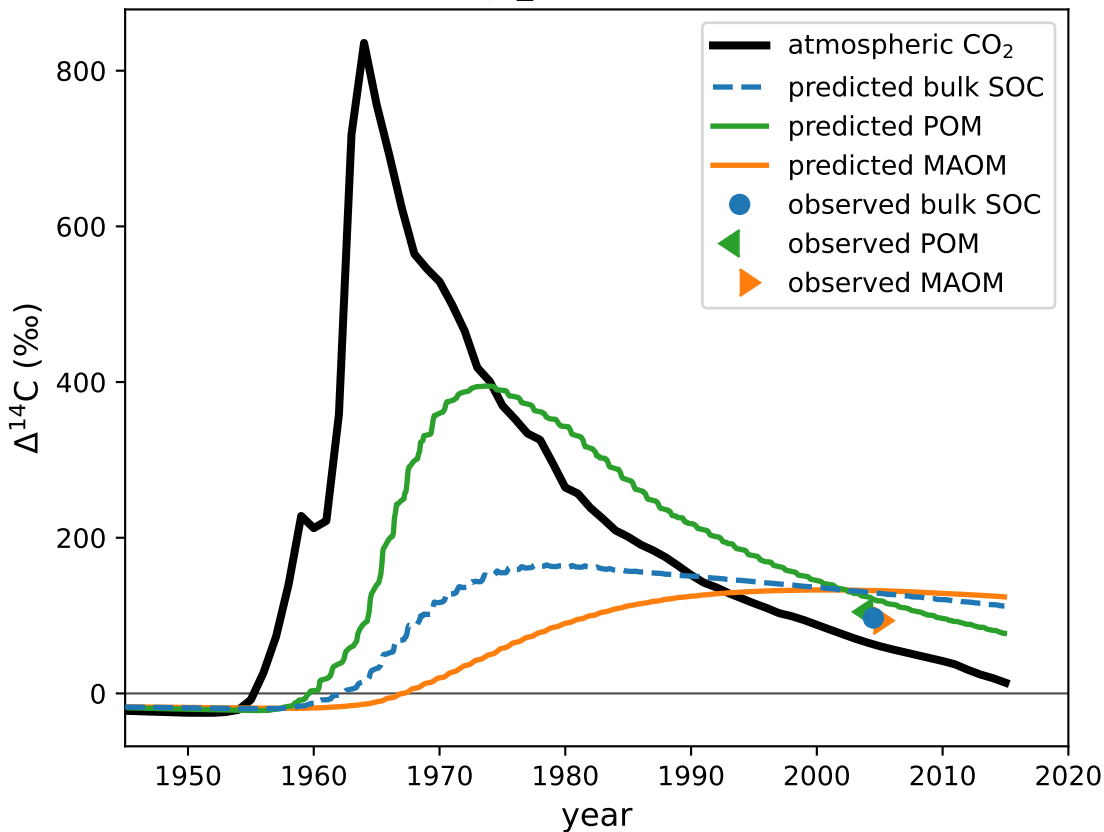

Supplement: Supplementary file 13 [file gmd-2023-242-supplement.zip]

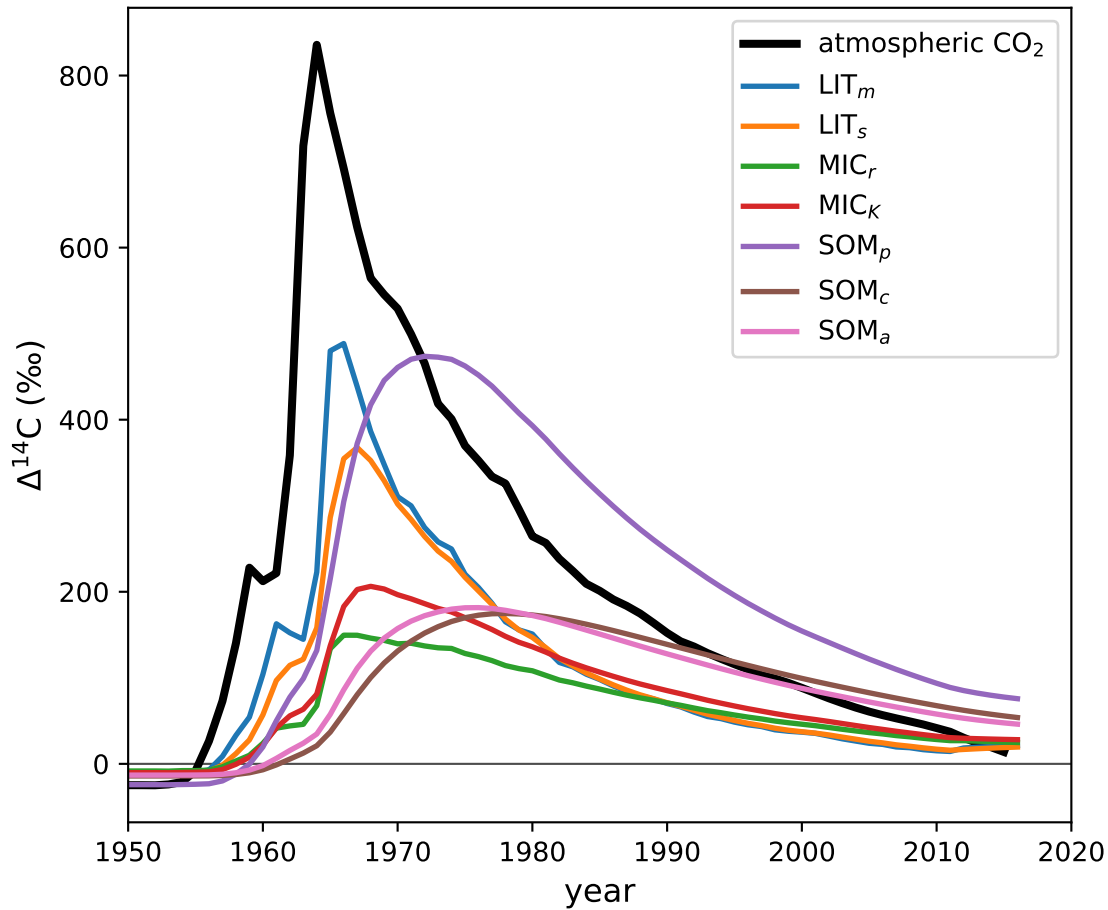

Supplement: Supplementary file 14 [file gmd-2023-242-supplement.zip]

MIMICS  
Rasmussen\_2018, GRpp, GRpp

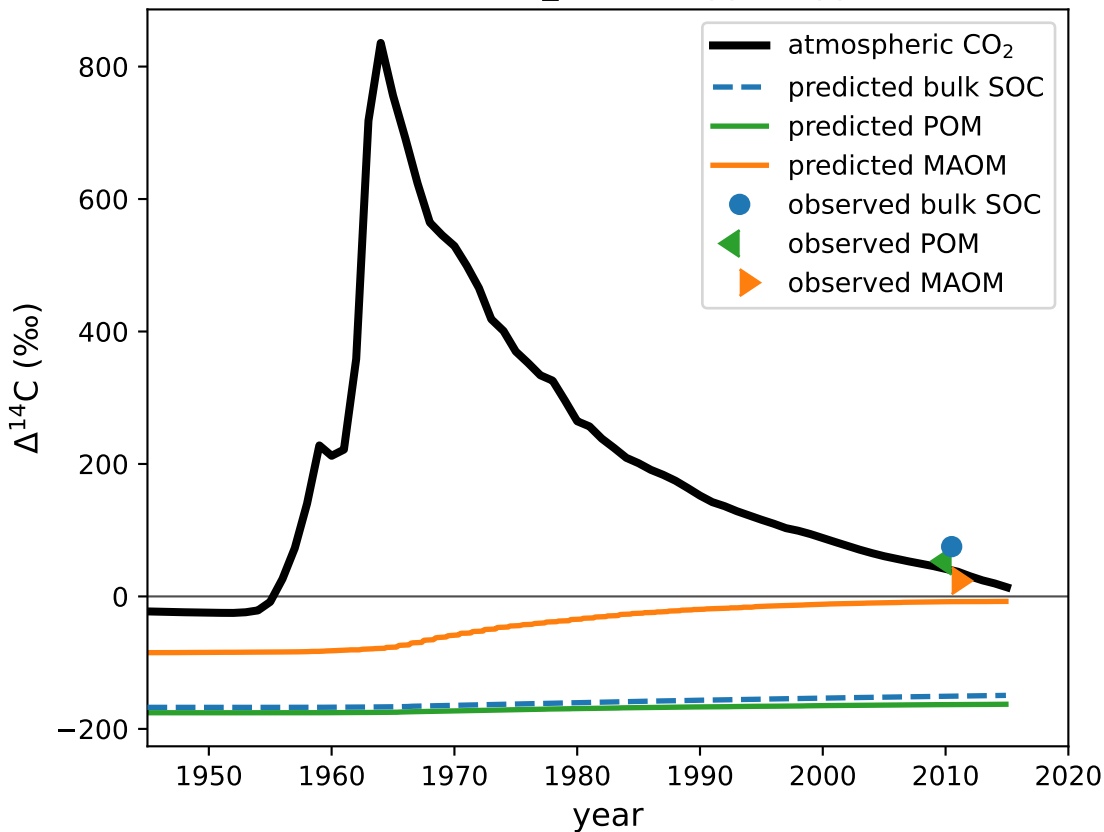

Supplement: Supplementary file 15 [file gmd-2023-242-supplement.zip]

MIMICS  
Rasmussen\_2018, BSwf, BSwf

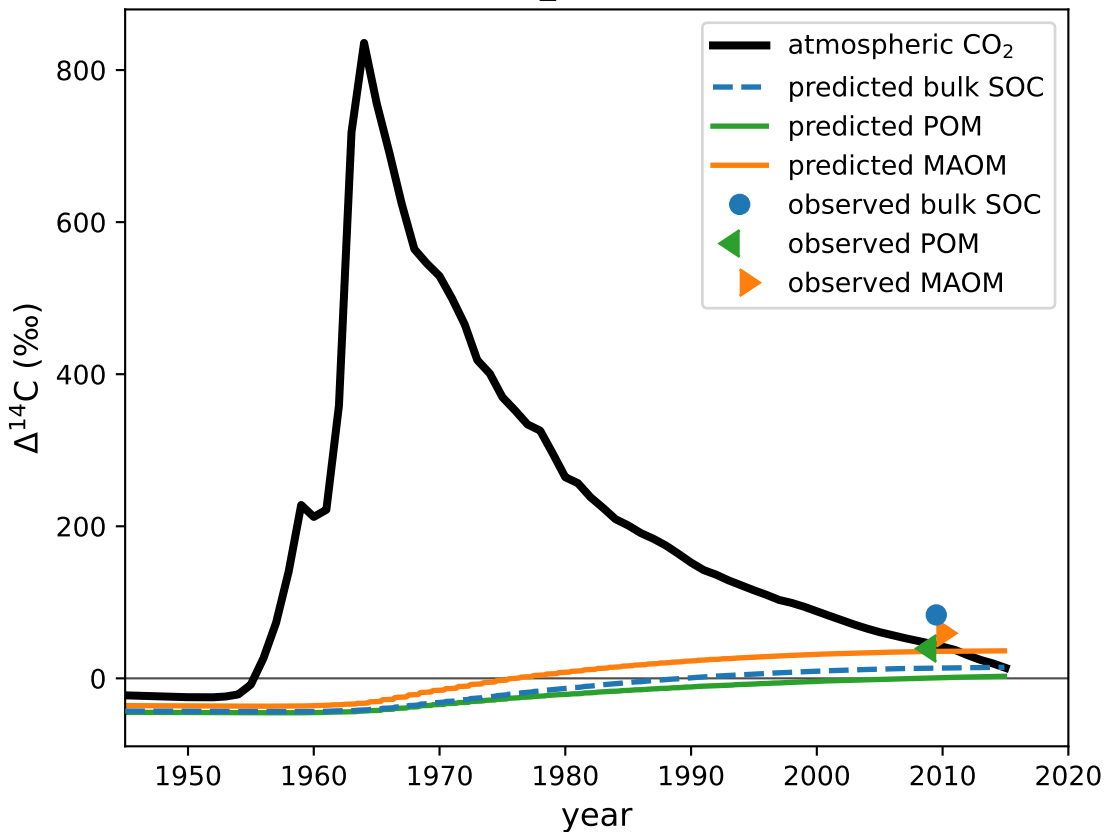

Supplement: Supplementary file 16 [file gmd-2023-242-supplement.zip]

Millennial  
McFarlane\_2013, MI-Coarse UMBS, G3

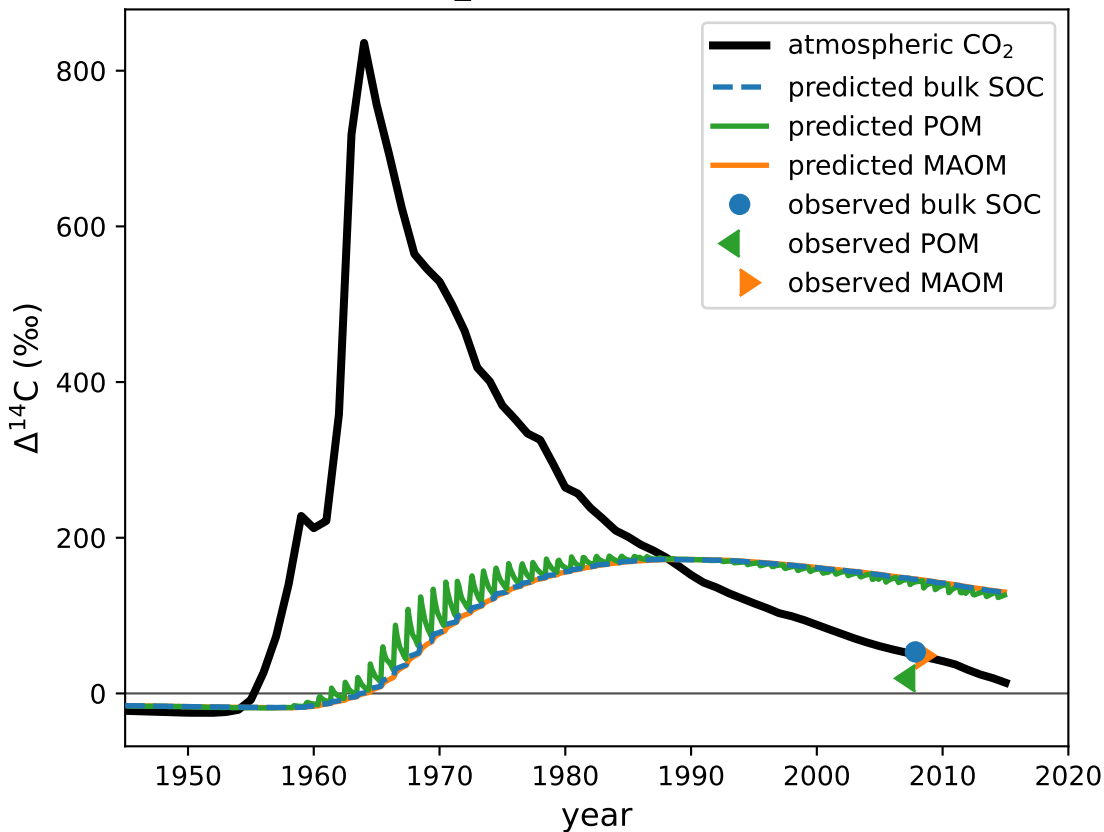

Supplement: Supplementary file 17 [file gmd-2023-242-supplement.zip]

MIMICS  
Berhe\_2012, Tennessee Valley, plain comp

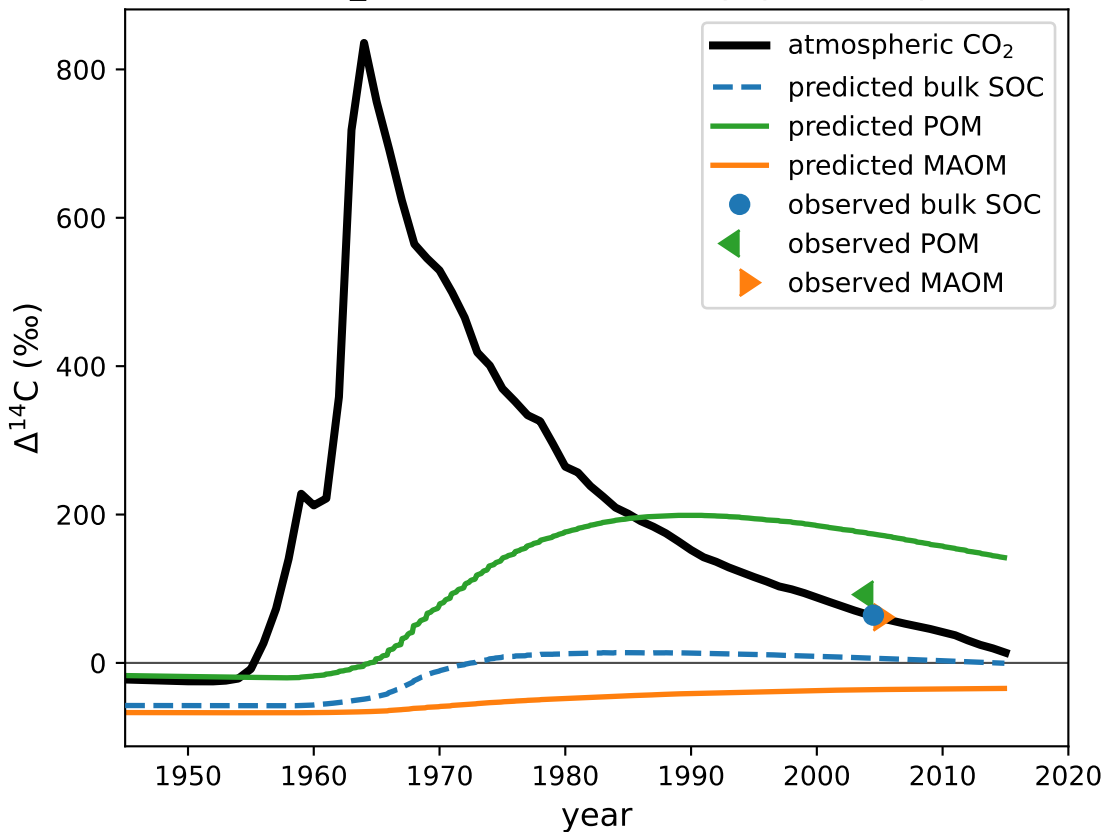

Supplement: Supplementary file 18 [file gmd-2023-242-supplement.zip]

CORPSE  
Meyer\_2012, Matsch, Abandoned

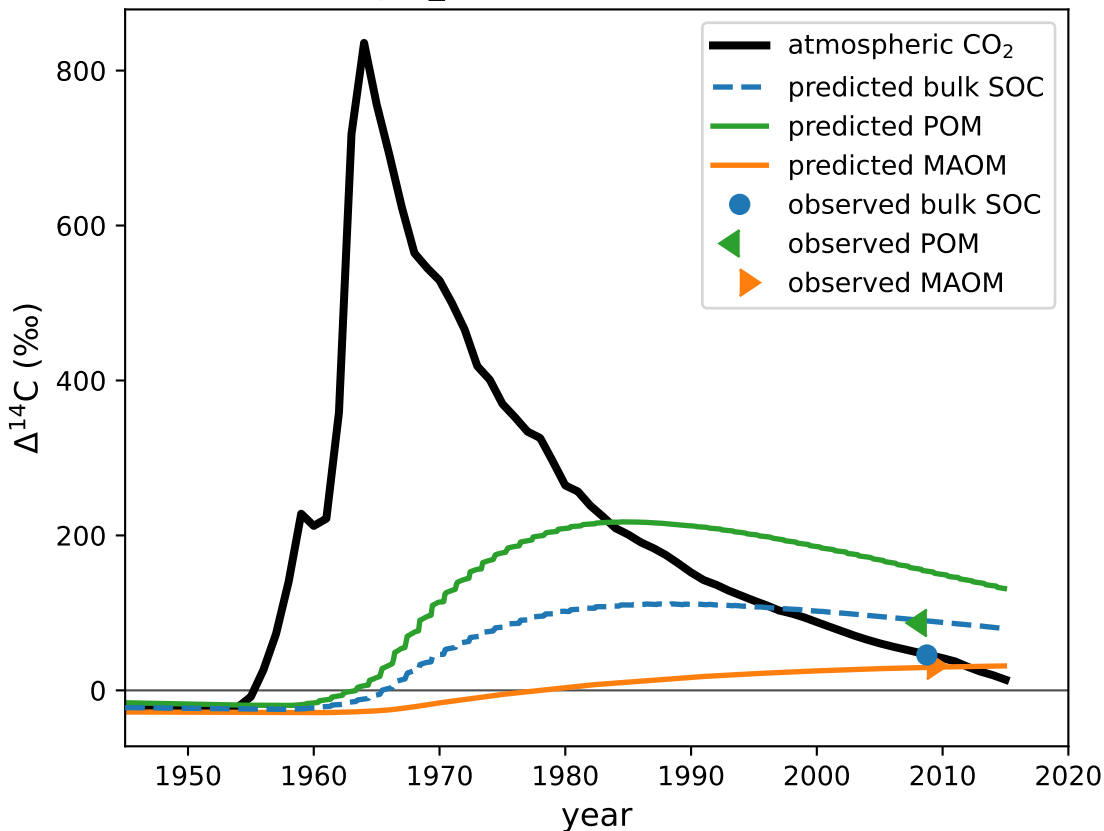

Supplement: Supplementary file 19 [file gmd-2023-242-supplement.zip]

MIMICS  
Lybrand\_2017, Catalina CZO desert, desert scrub\_convergent

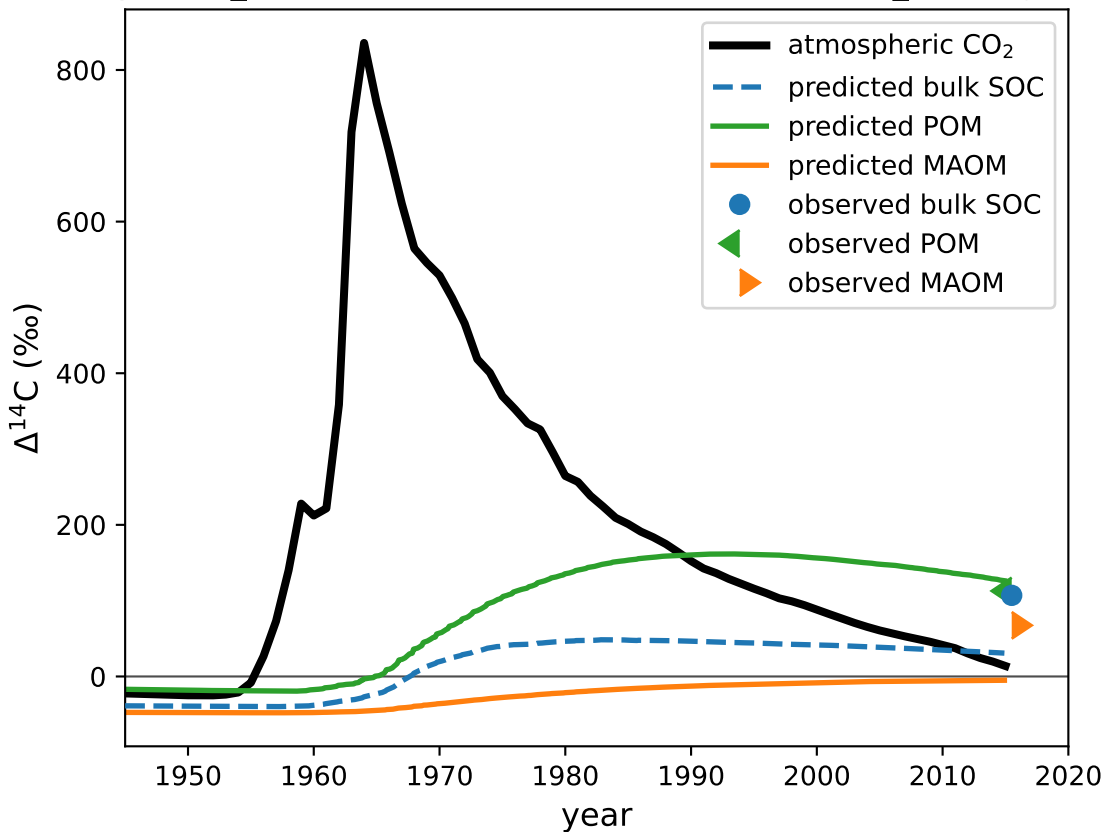

Supplement: Supplementary file 20 [file gmd-2023-242-supplement.zip]

CORPSE  
McFarlane\_2013, MA Harvard Forest, H5

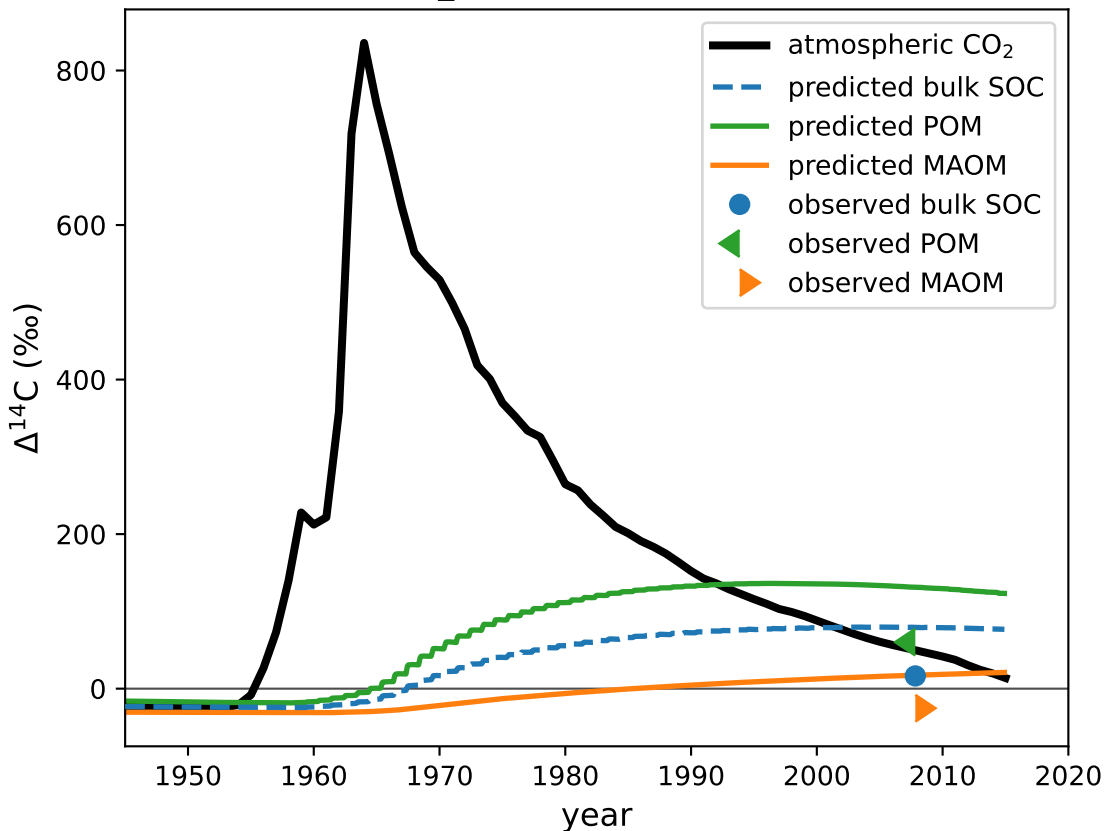

Supplement: Supplementary file 21 [file gmd-2023-242-supplement.zip]

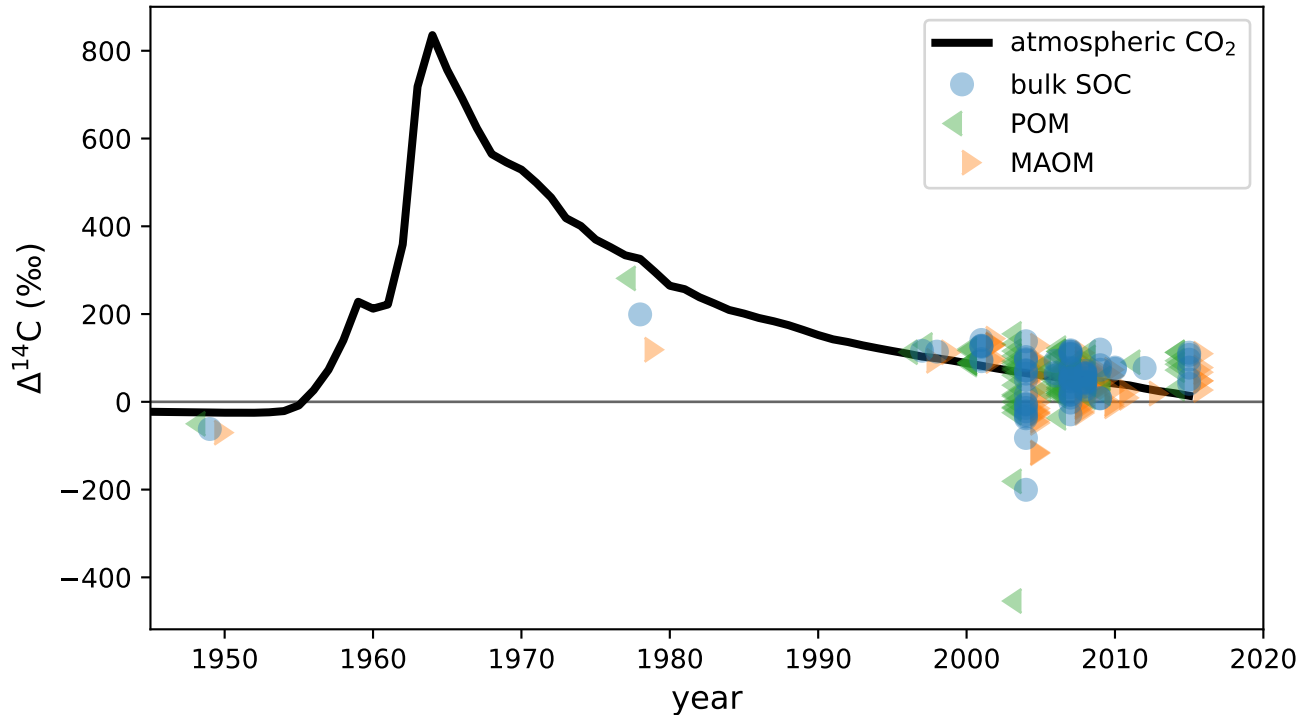

Supplement: Supplementary file 22 [file gmd-2023-242-supplement.zip]

MIMICS  
McFarlane\_2013, MO Ozark BREA, M1

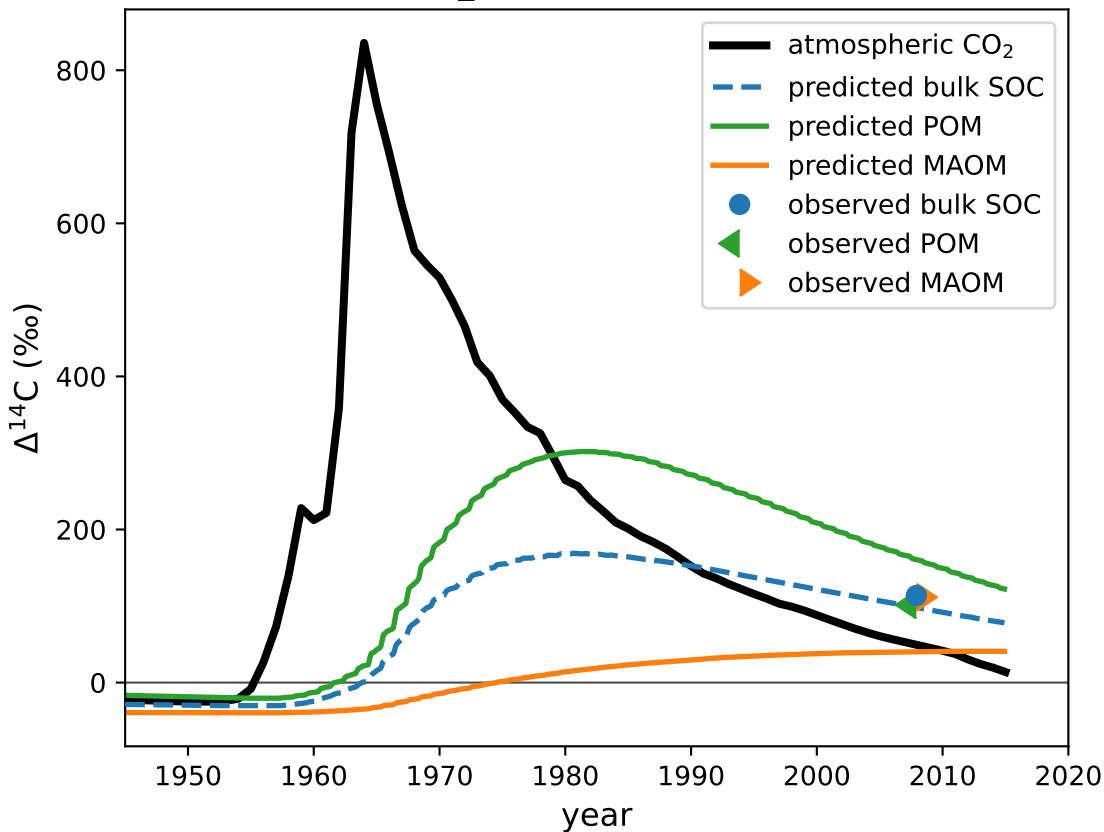

Supplement: Supplementary file 23 [file gmd-2023-242-supplement.zip]

MEND  
Berhe\_2012, Tennessee Valley, plain comp

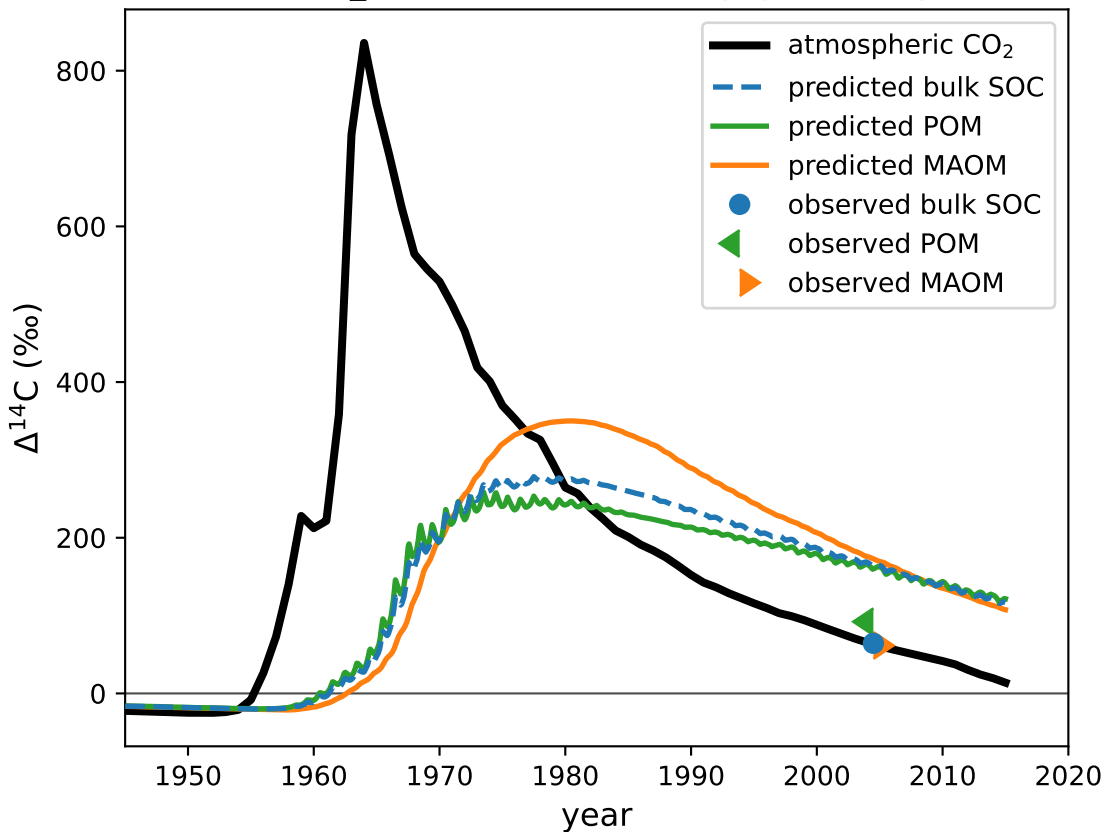

Supplement: Supplementary file 24 [file gmd-2023-242-supplement.zip]

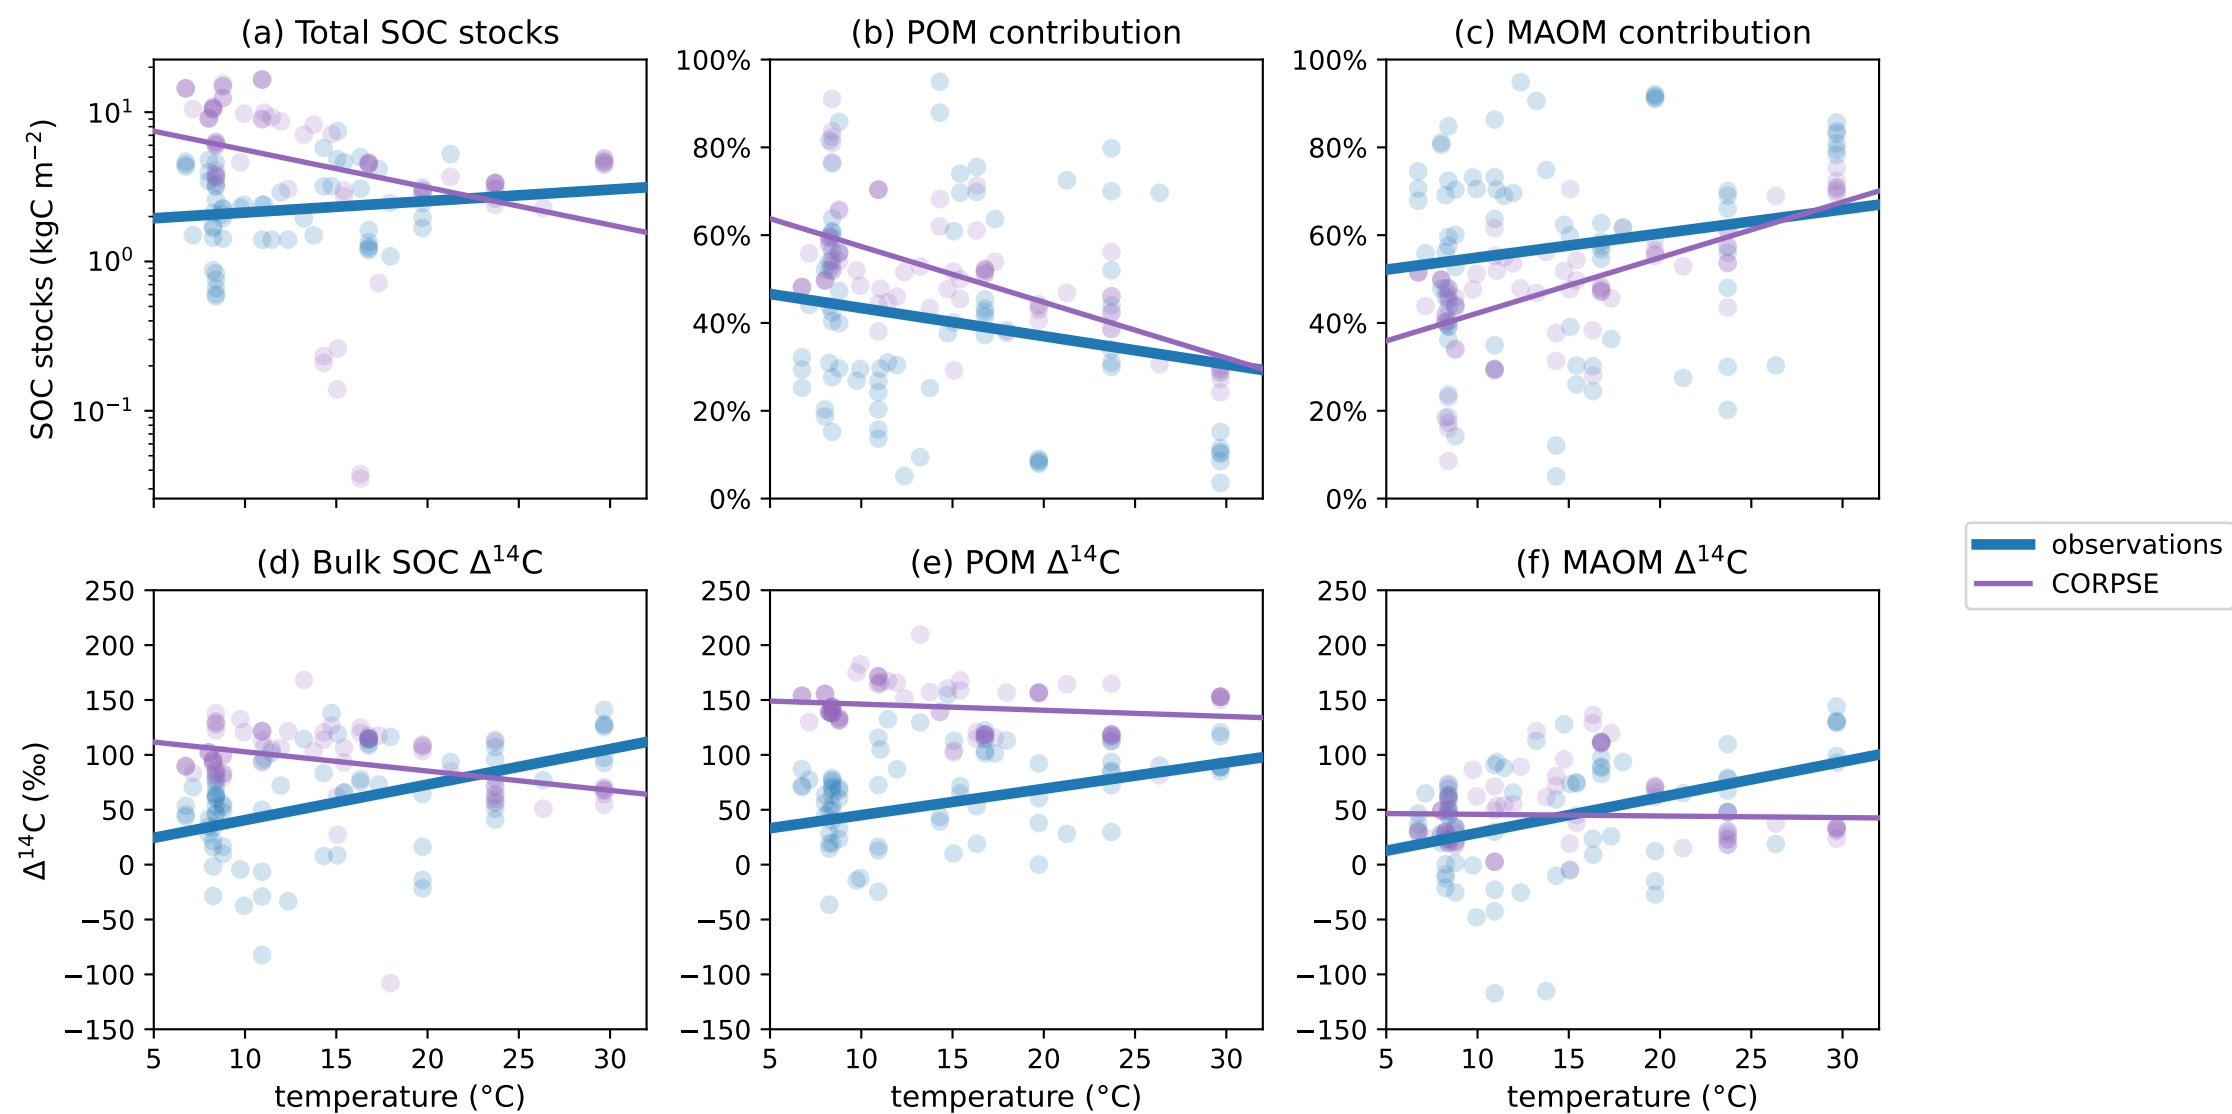

Supplement: Supplementary file 25 [file gmd-2023-242-supplement.zip]

CORPSE  
Schrumpf\_2013, Carlow, Carlow.1

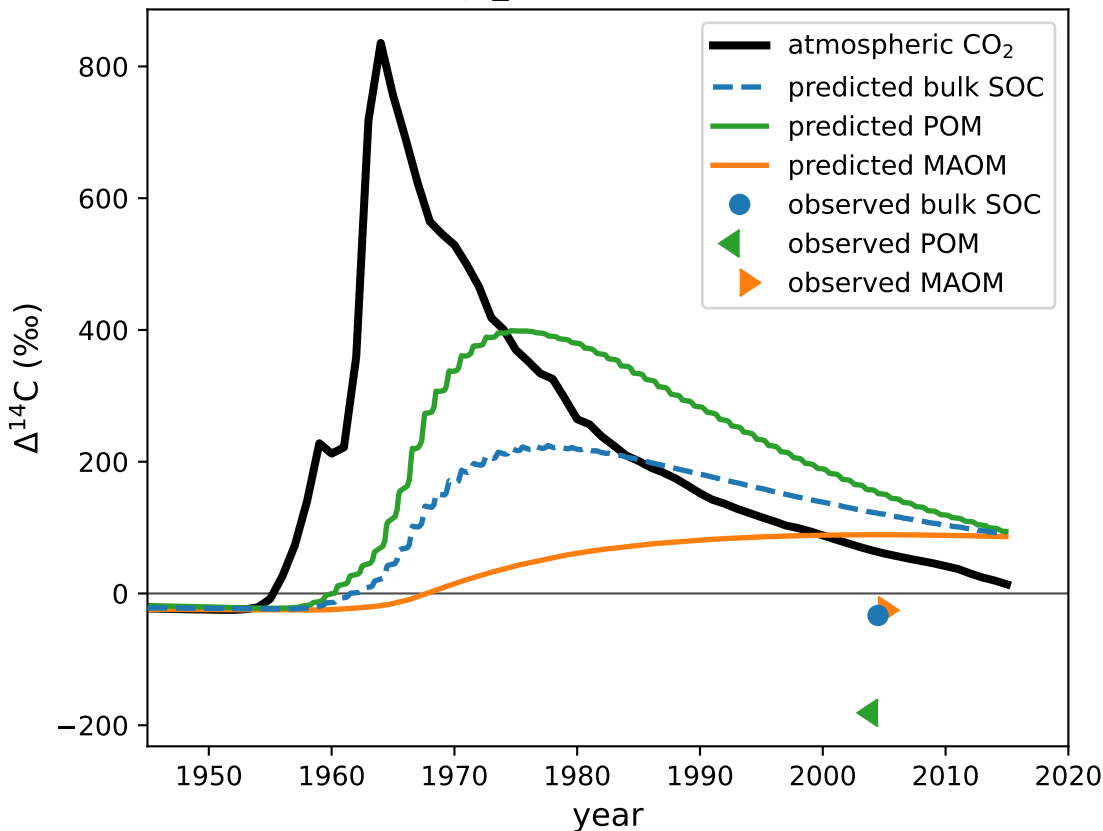

Supplement: Supplementary file 26 [file gmd-2023-242-supplement.zip]

SOMic  
McFarlane\_2013, MO Ozark BREA, M4

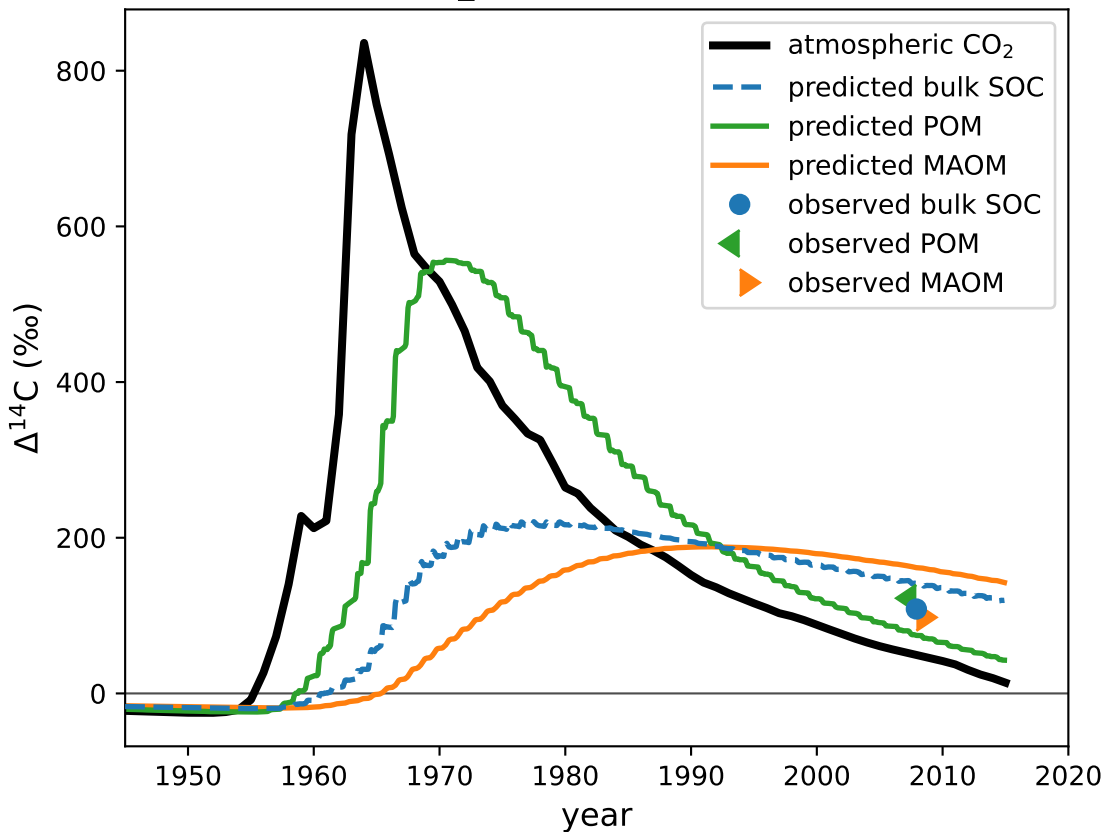

Supplement: Supplementary file 27 [file gmd-2023-242-supplement.zip]

SOMic  
McFarlane\_2013, NH Bartlett Forest, B3

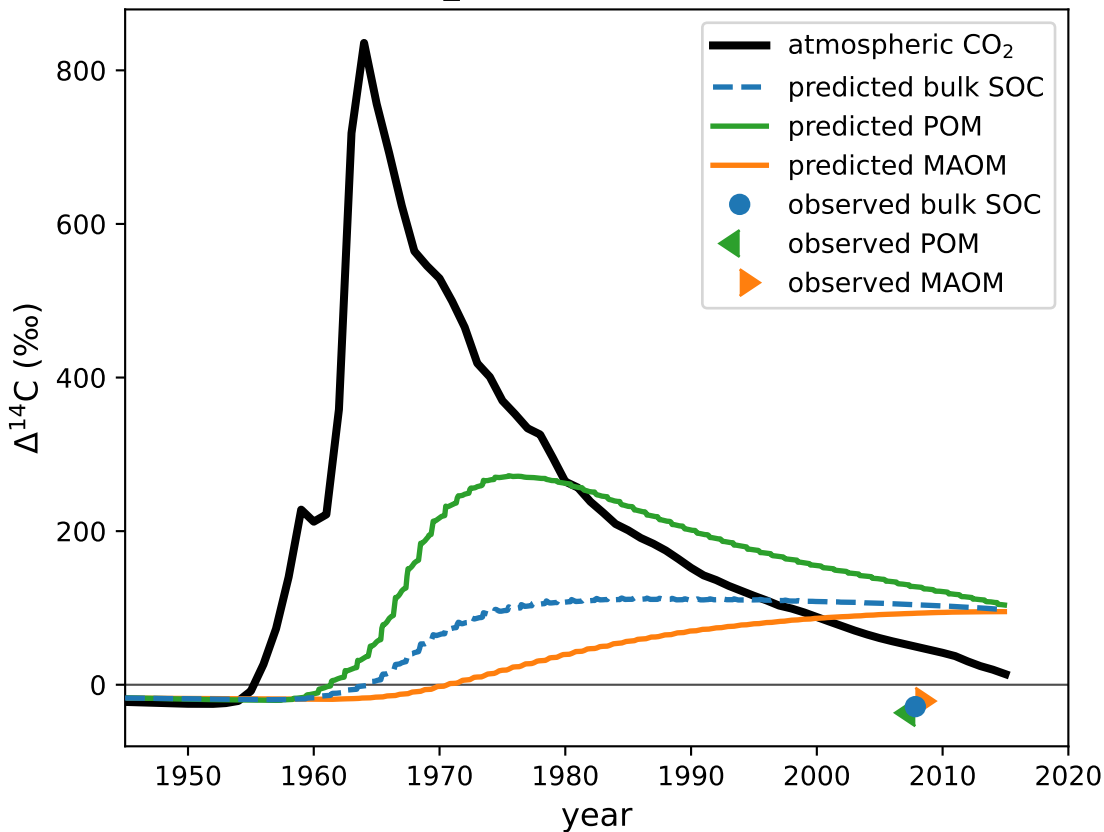

Supplement: Supplementary file 28 [file gmd-2023-242-supplement.zip]

Millennial  
Baisden\_2002, China Hat, ChinaHat.1978

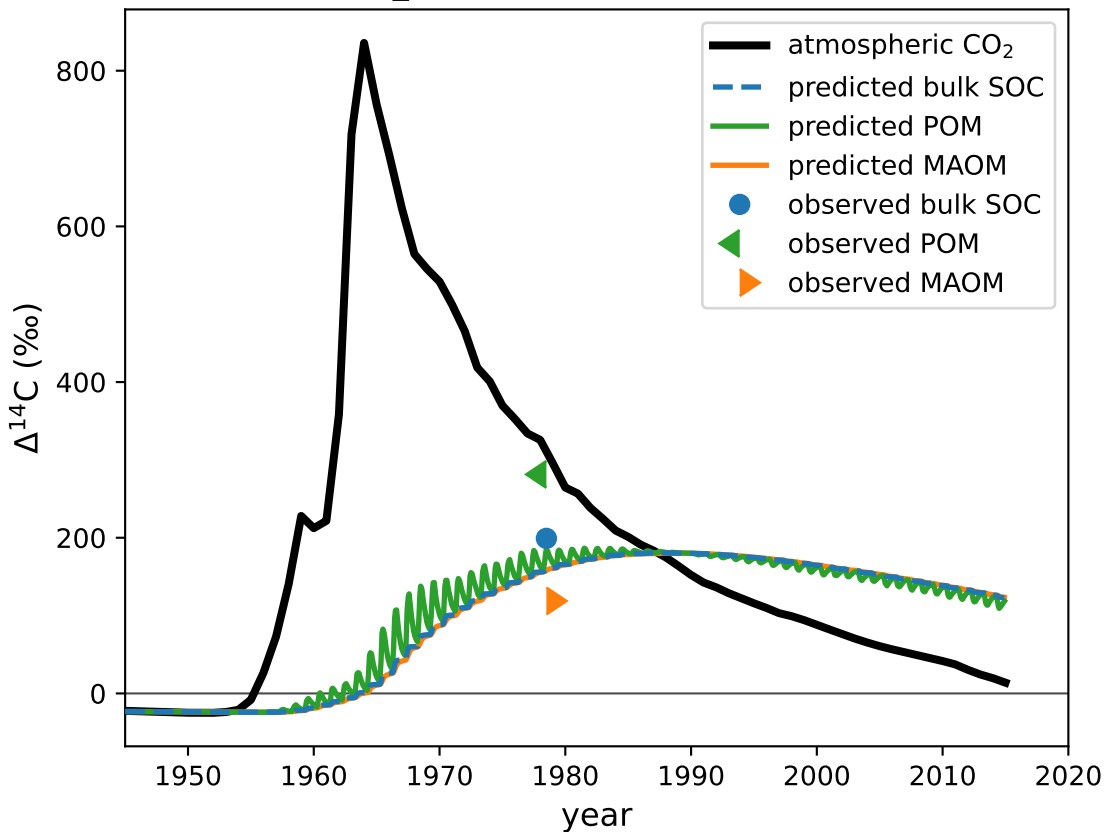

Supplement: Supplementary file 29 [file gmd-2023-242-supplement.zip]

CORPSE  
Harden\_2002, Dinesen, DPPR2

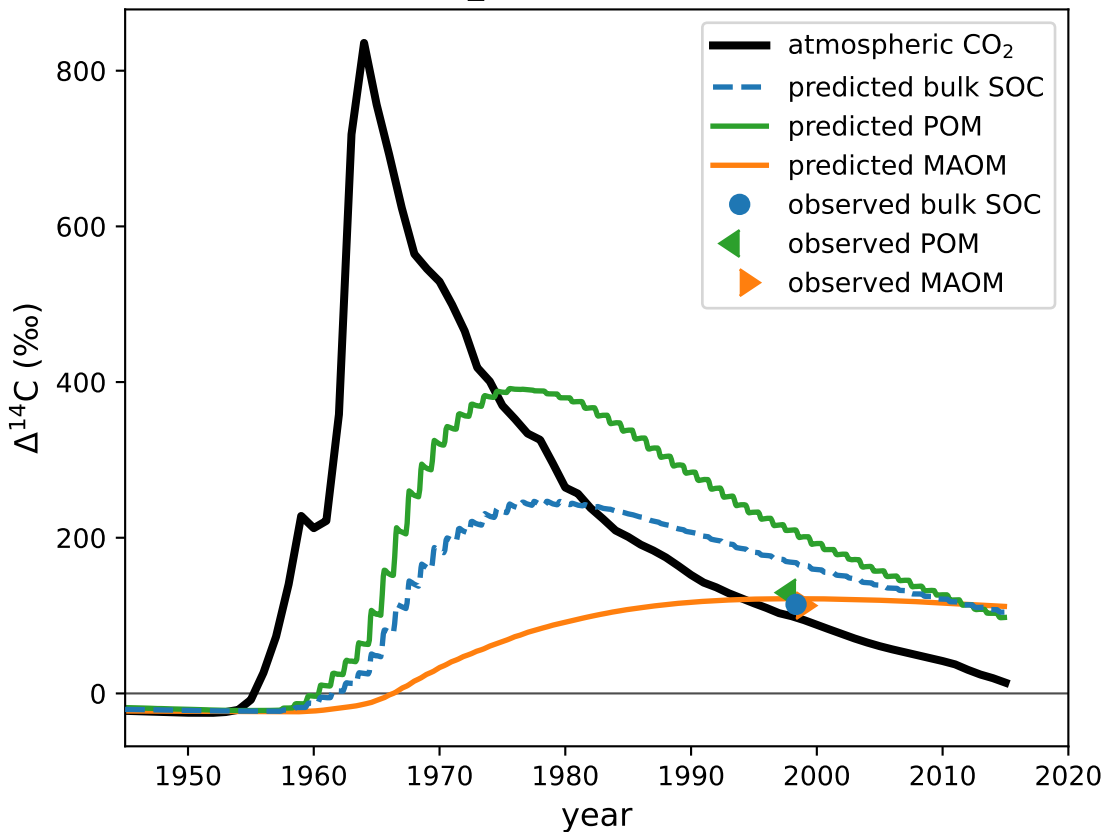

Supplement: Supplementary file 30 [file gmd-2023-242-supplement.zip]

MEND  
Meyer\_2012, Stubai, Pasture

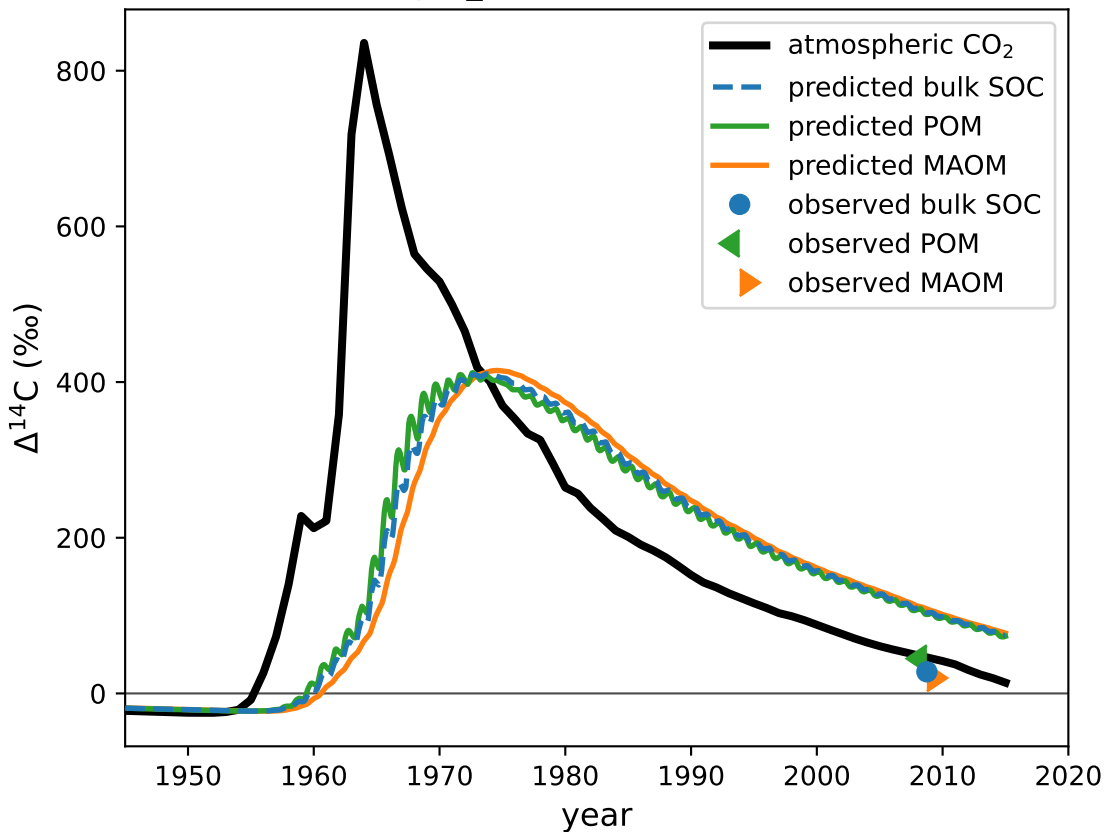

Supplement: Supplementary file 31 [file gmd-2023-242-supplement.zip]

MIMICS  
McFarlane\_2013, MO Ozark BREA, M3

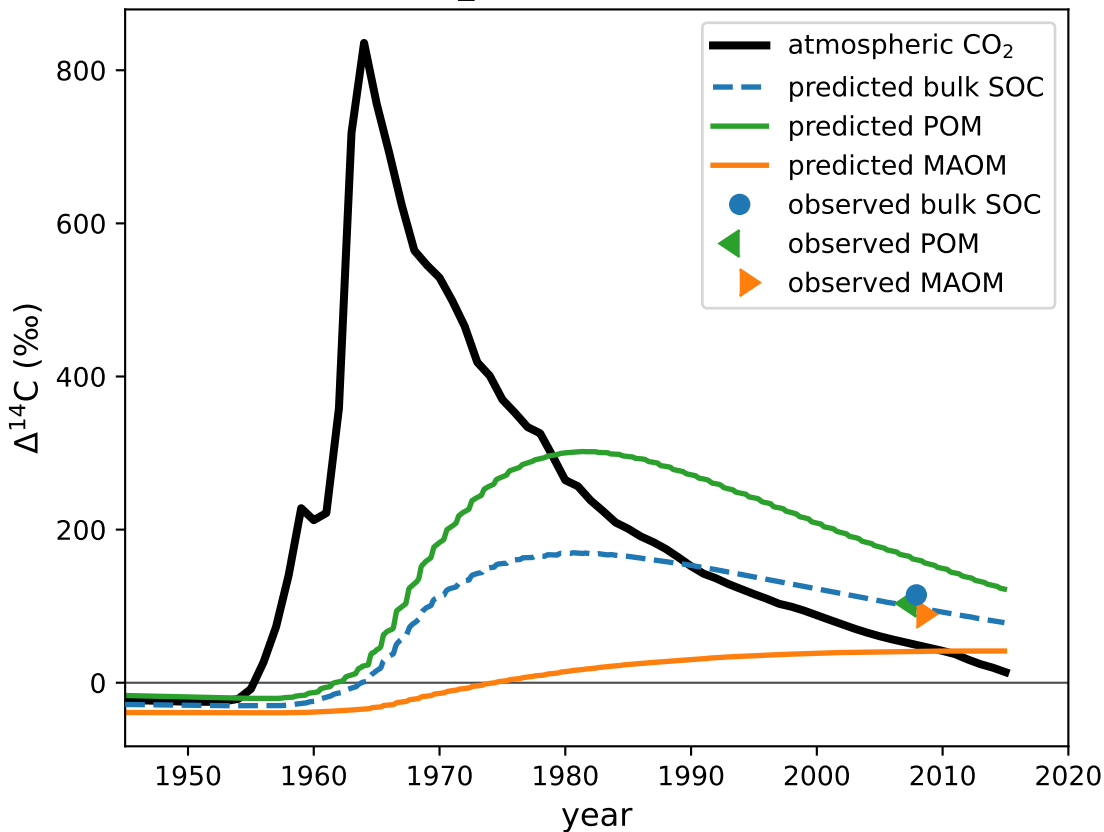

Supplement: Supplementary file 32 [file gmd-2023-242-supplement.zip]

MEND  
McFarlane\_2013, MI-Coarse UMBS, G3

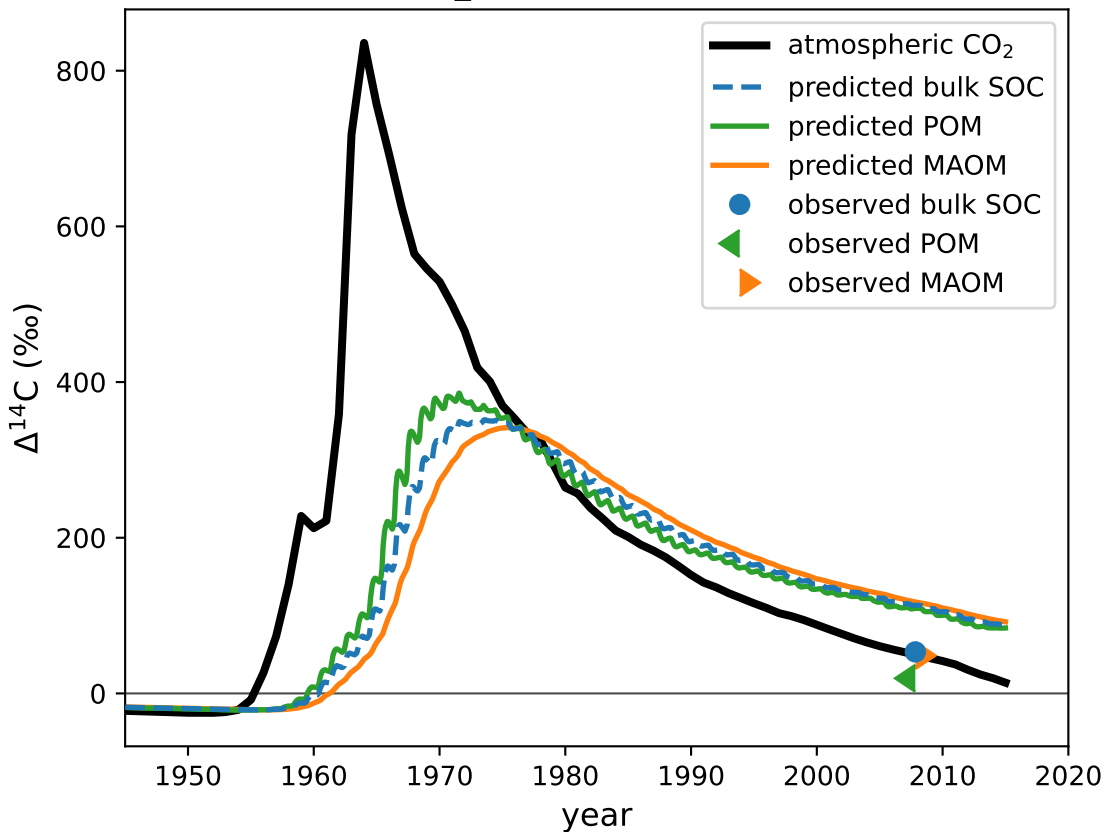

Supplement: Supplementary file 33 [file gmd-2023-242-supplement.zip]

SOMic  
Meyer\_2012, Stubai, Meadow

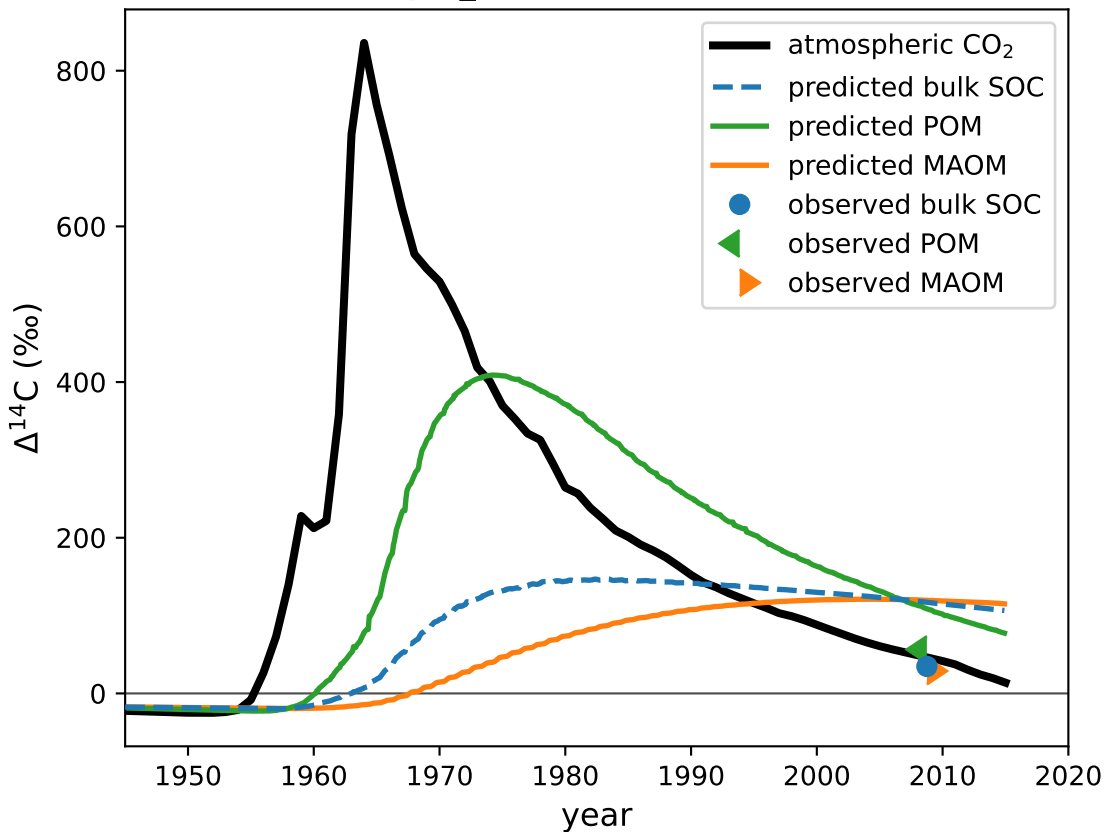

Supplement: Supplementary file 34 [file gmd-2023-242-supplement.zip]

CORPSE  
Schrumpf\_2013, Gebesee, Gebesee.1

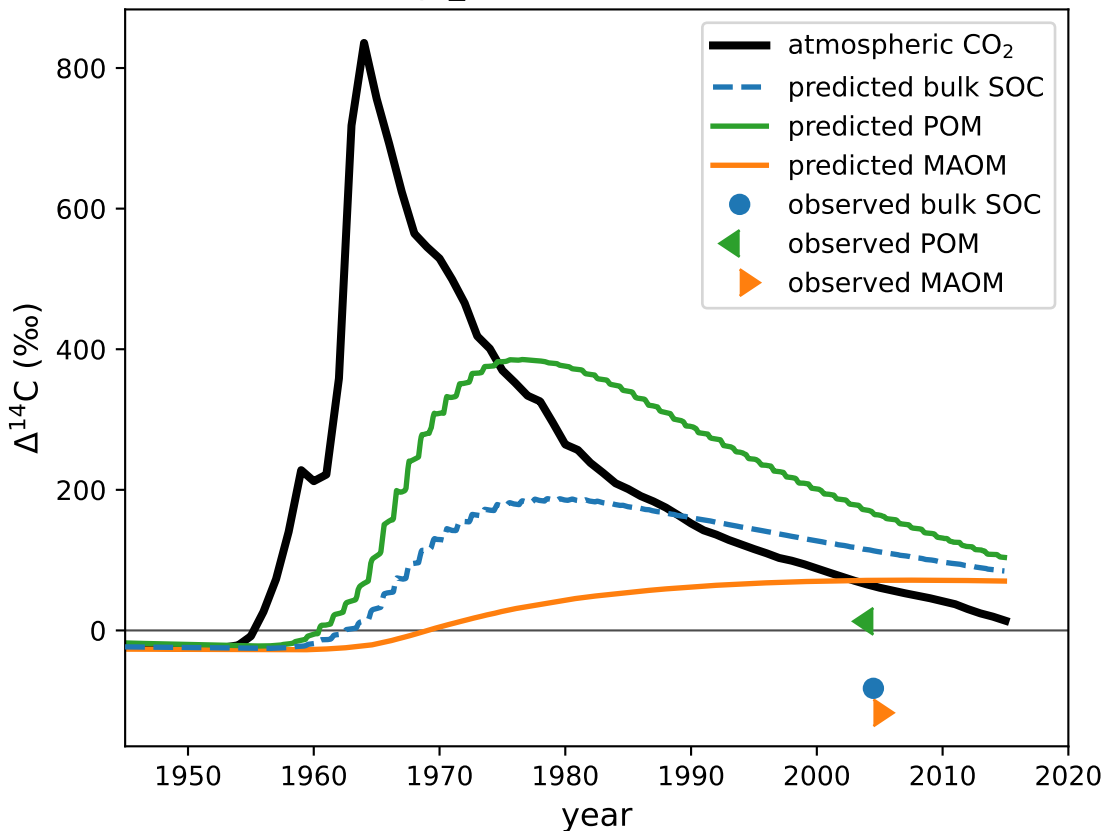

Supplement: Supplementary file 35 [file gmd-2023-242-supplement.zip]

MEND  
McFarlane\_2013, Mi-Fine Colonial Point, C3

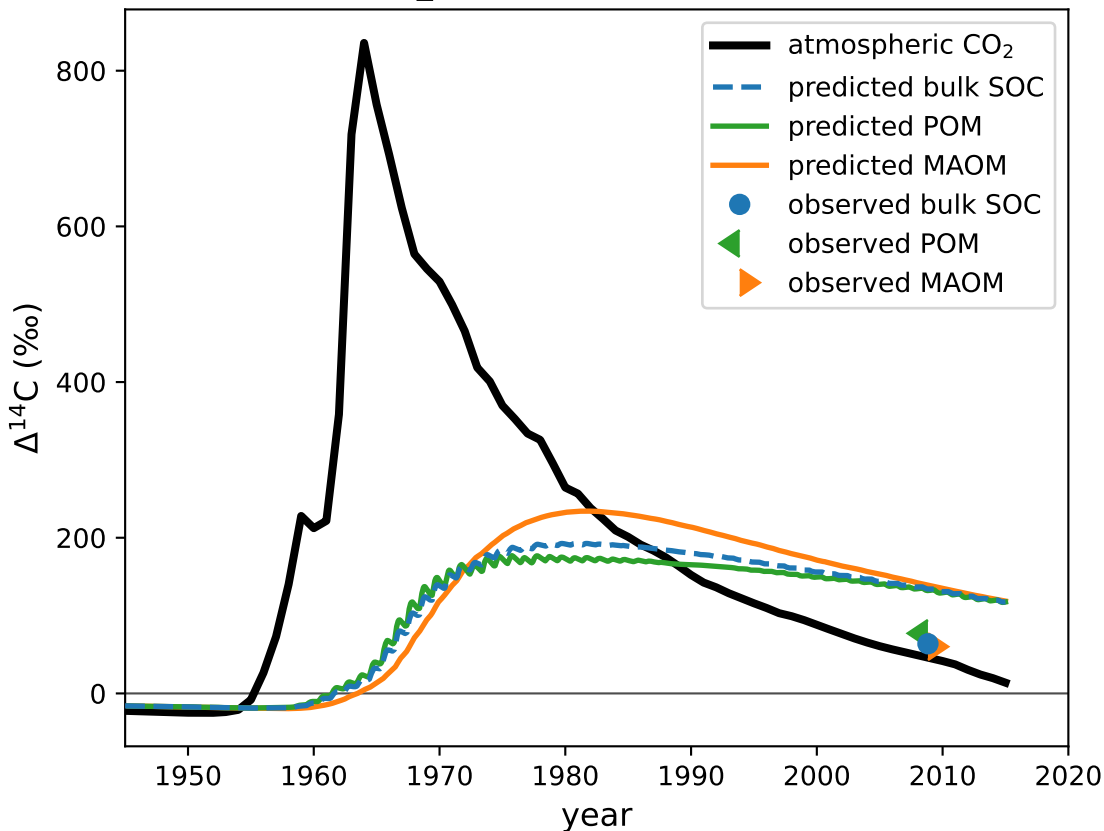

Supplement: Supplementary file 36 [file gmd-2023-242-supplement.zip]

MEND  
McFarlane\_2013, NH Bartlett Forest, B5

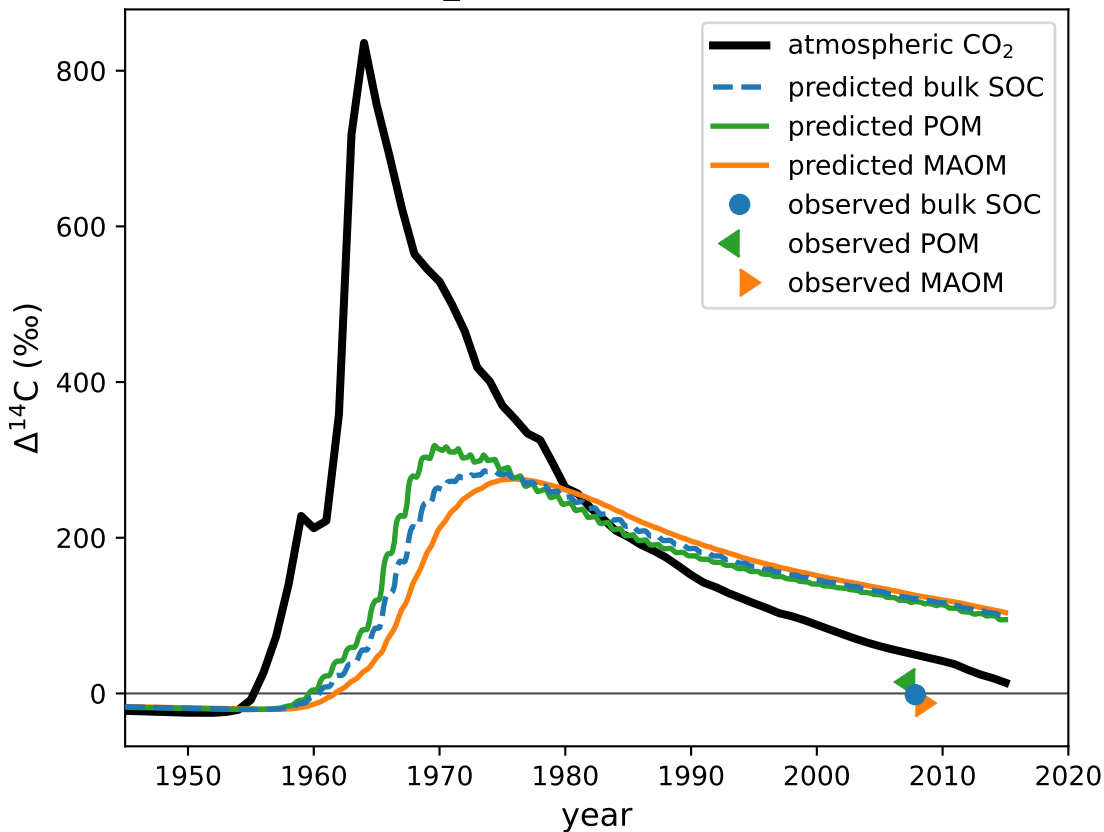

Supplement: Supplementary file 37 [file gmd-2023-242-supplement.zip]

CORPSE  
McFarlane\_2013, MI-Coarse UMBS, 60M

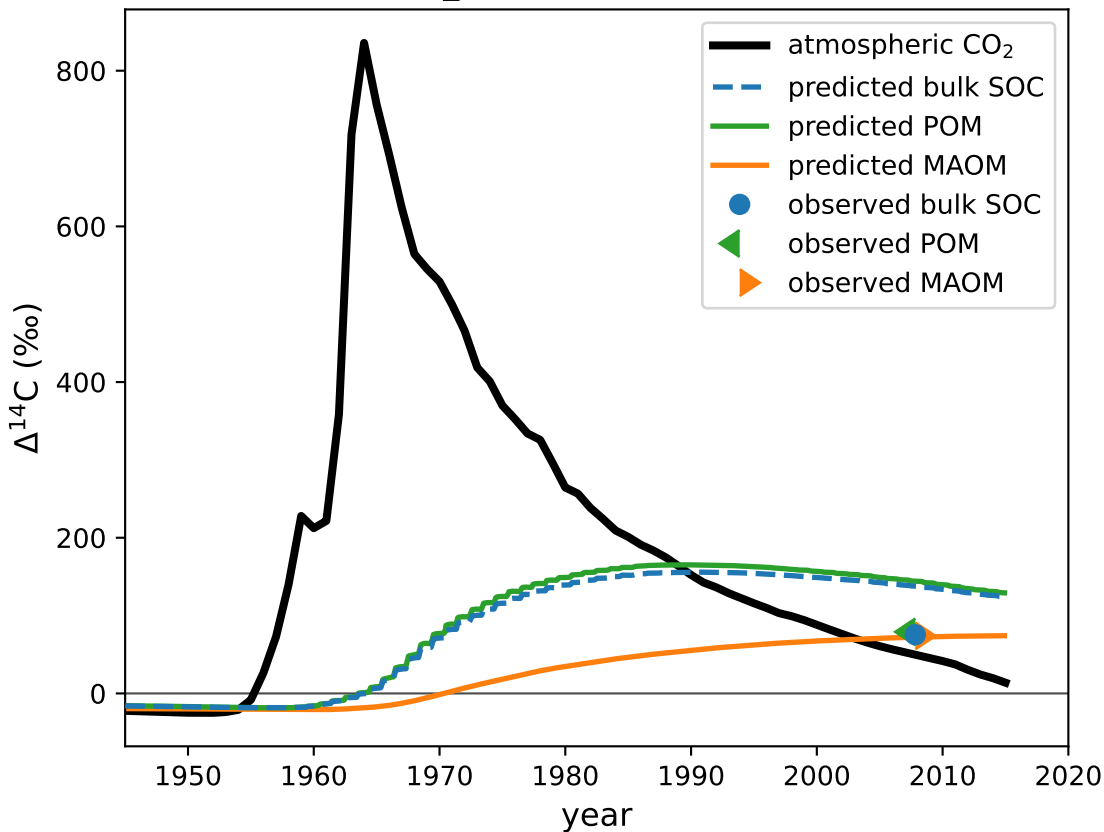

Supplement: Supplementary file 38 [file gmd-2023-242-supplement.zip]

MIMICS  
McFarlane\_2013, MA Harvard Forest, H3

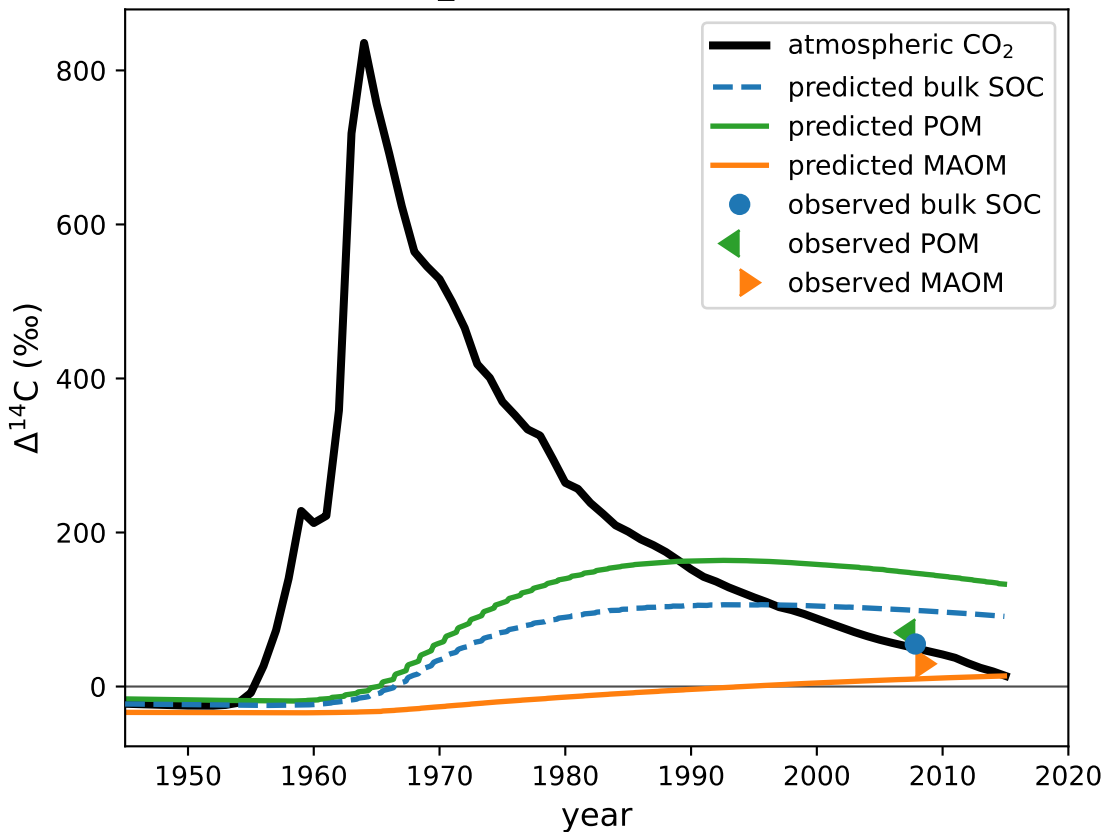

Supplement: Supplementary file 39 [file gmd-2023-242-supplement.zip]

MIMICS  
McFarlane\_2013, Mi-Fine Colonial Point, C5

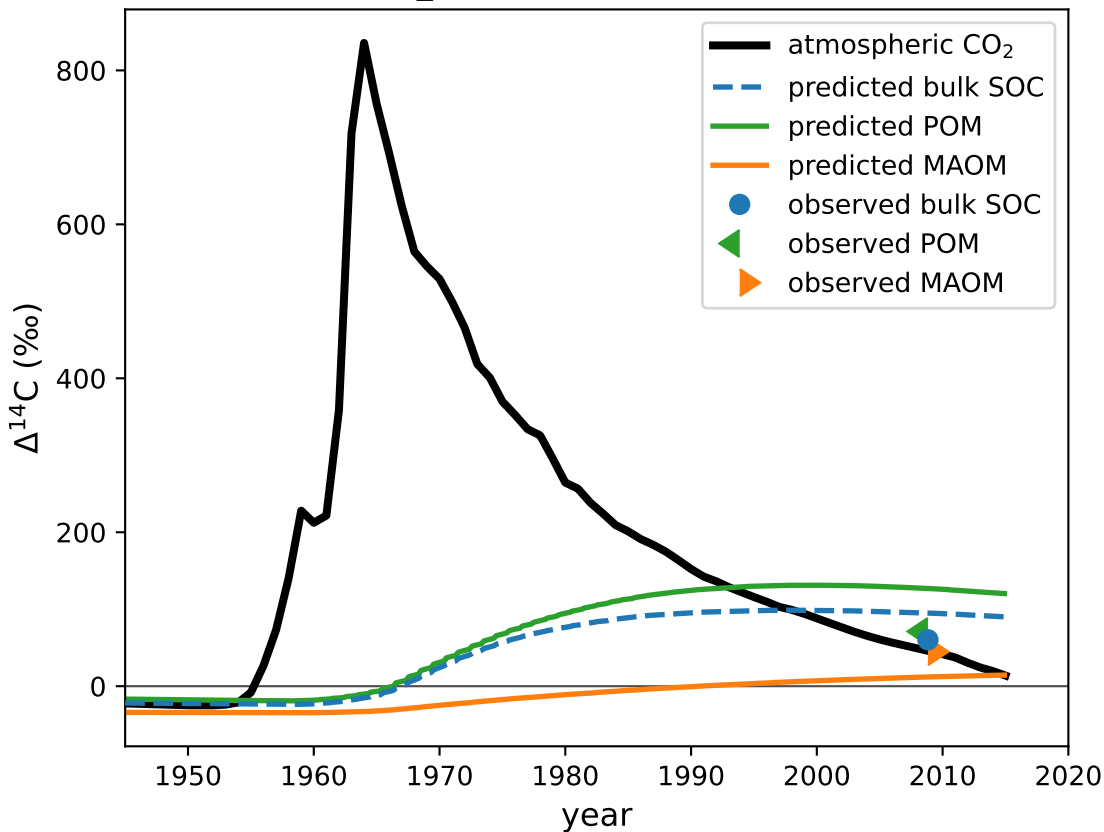

Supplement: Supplementary file 40 [file gmd-2023-242-supplement.zip]

Millennial  
Meyer\_2012, Matsch, Pasture

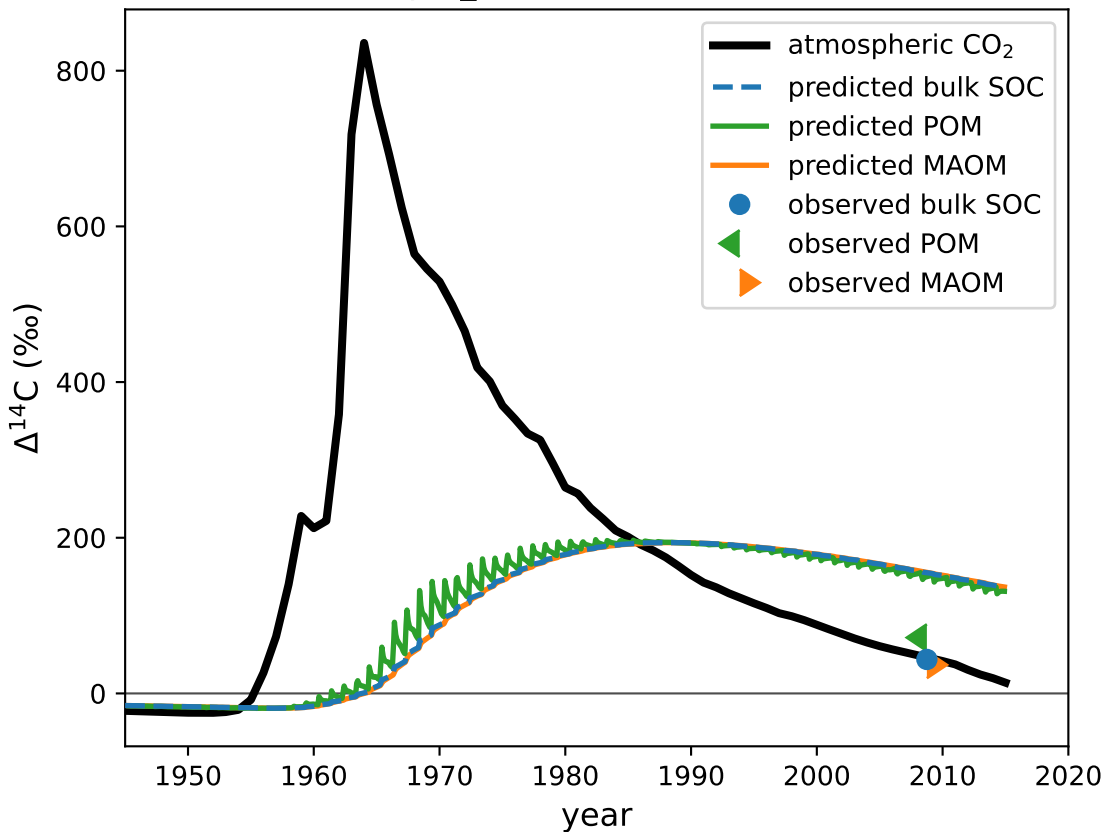

Supplement: Supplementary file 41 [file gmd-2023-242-supplement.zip]

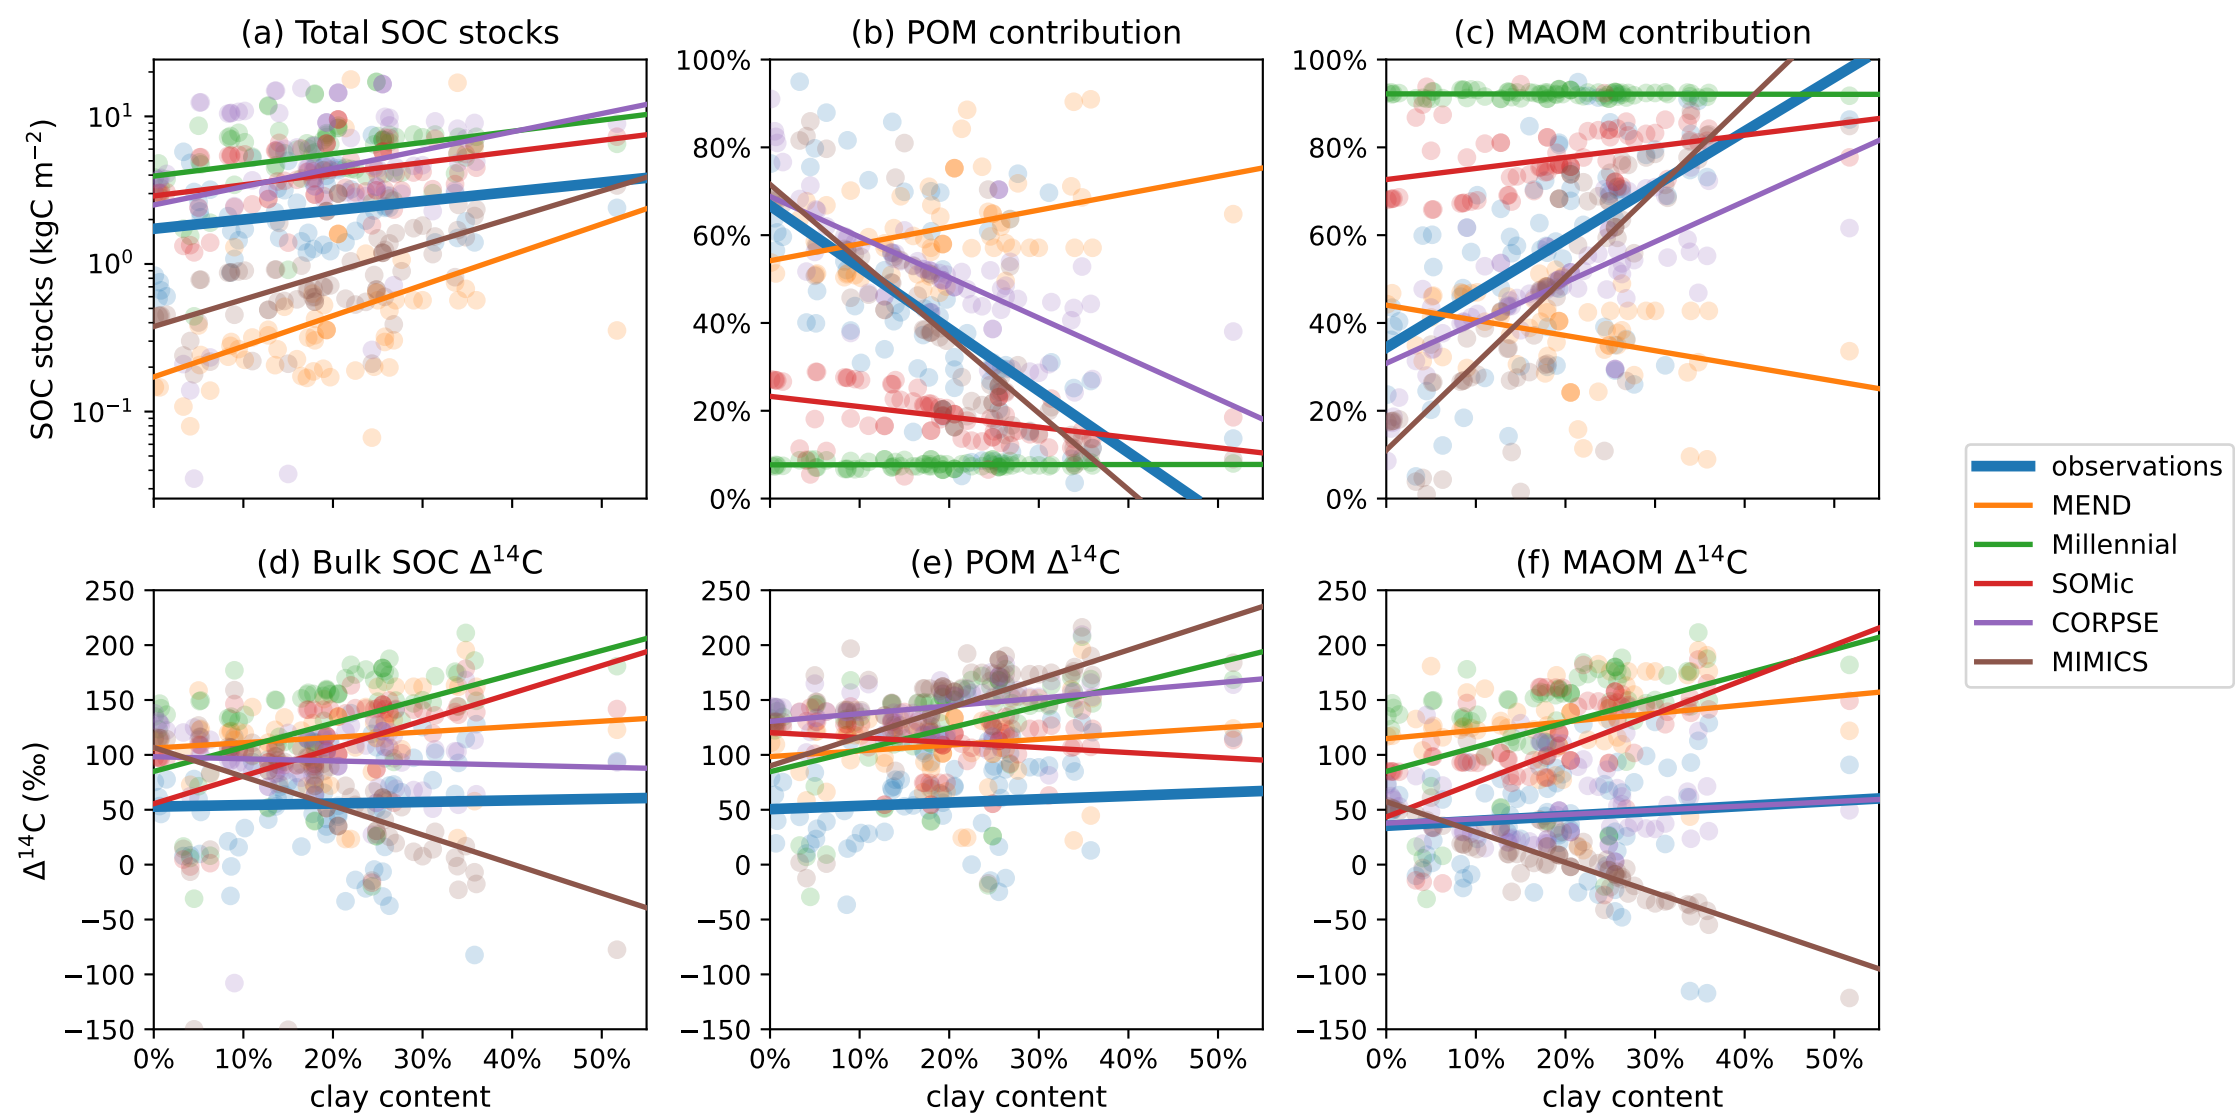

Supplement: Supplementary file 42 [file gmd-2023-242-supplement.zip]

Millennial  
Schrumpf\_2013, Grignon, Grignon.1

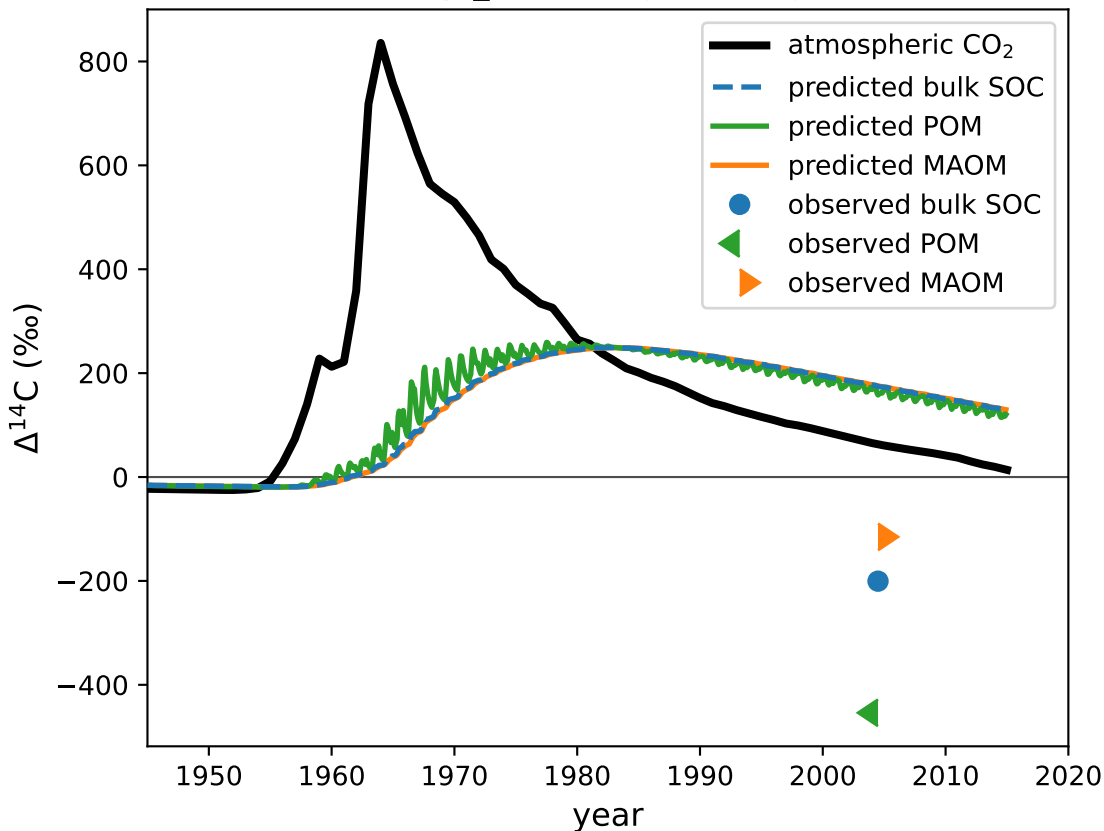

Supplement: Supplementary file 43 [file gmd-2023-242-supplement.zip]

SOMic  
Marin-Spiotta\_2008, Sierra de Cayey, Active pastures

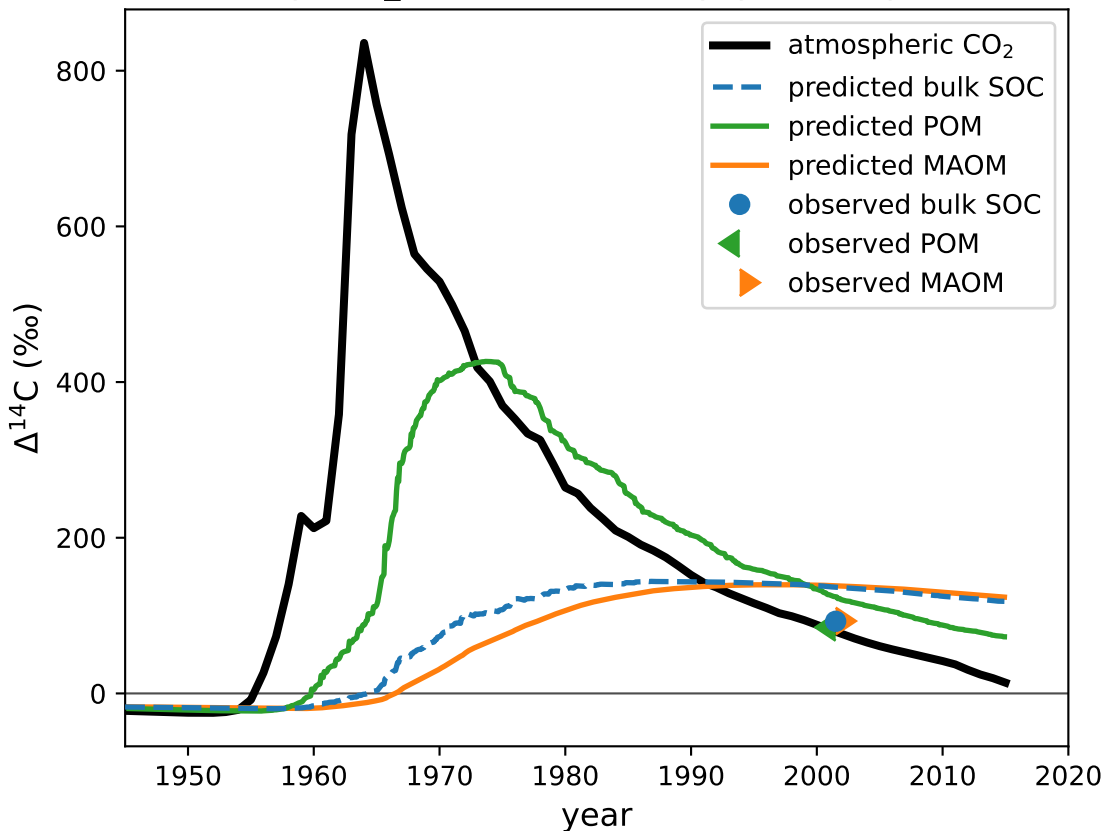

Supplement: Supplementary file 44 [file gmd-2023-242-supplement.zip]

MEND  
Berhe\_2012, Tennessee Valley, slope comp

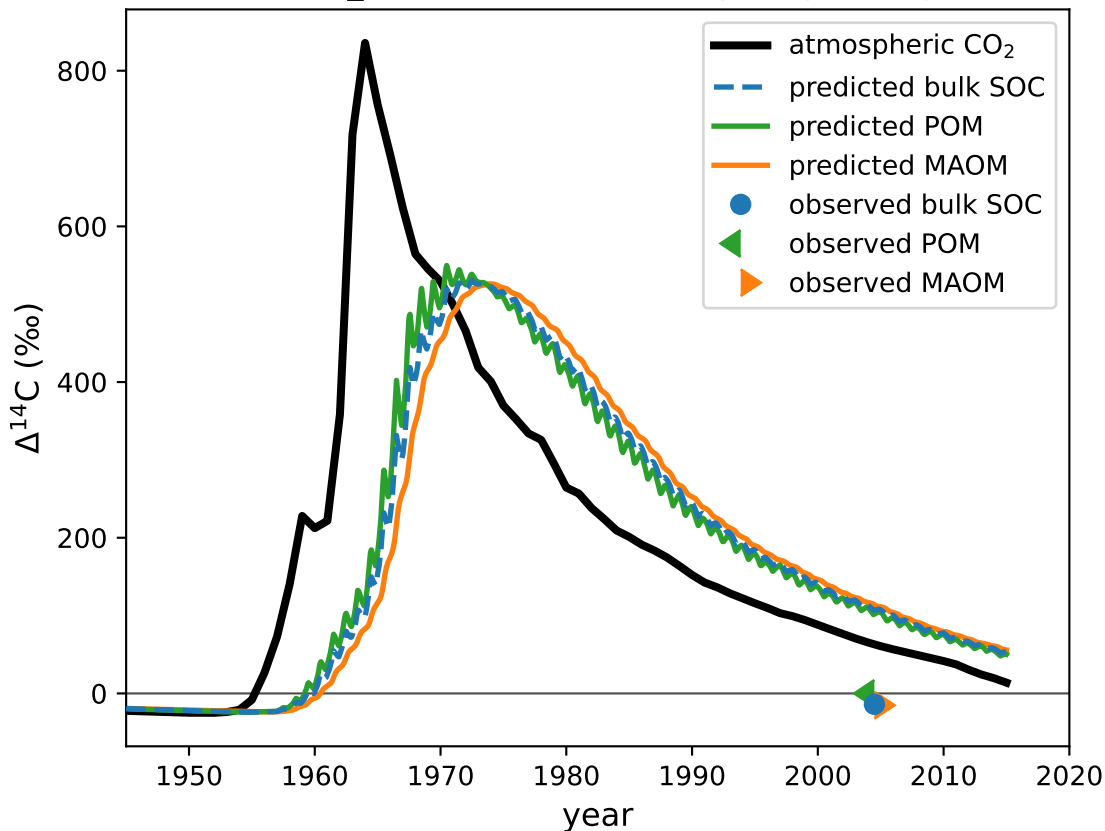

Supplement: Supplementary file 45 [file gmd-2023-242-supplement.zip]

CORPSE  
Schrumpf\_2013, Sorø, Sorø.1

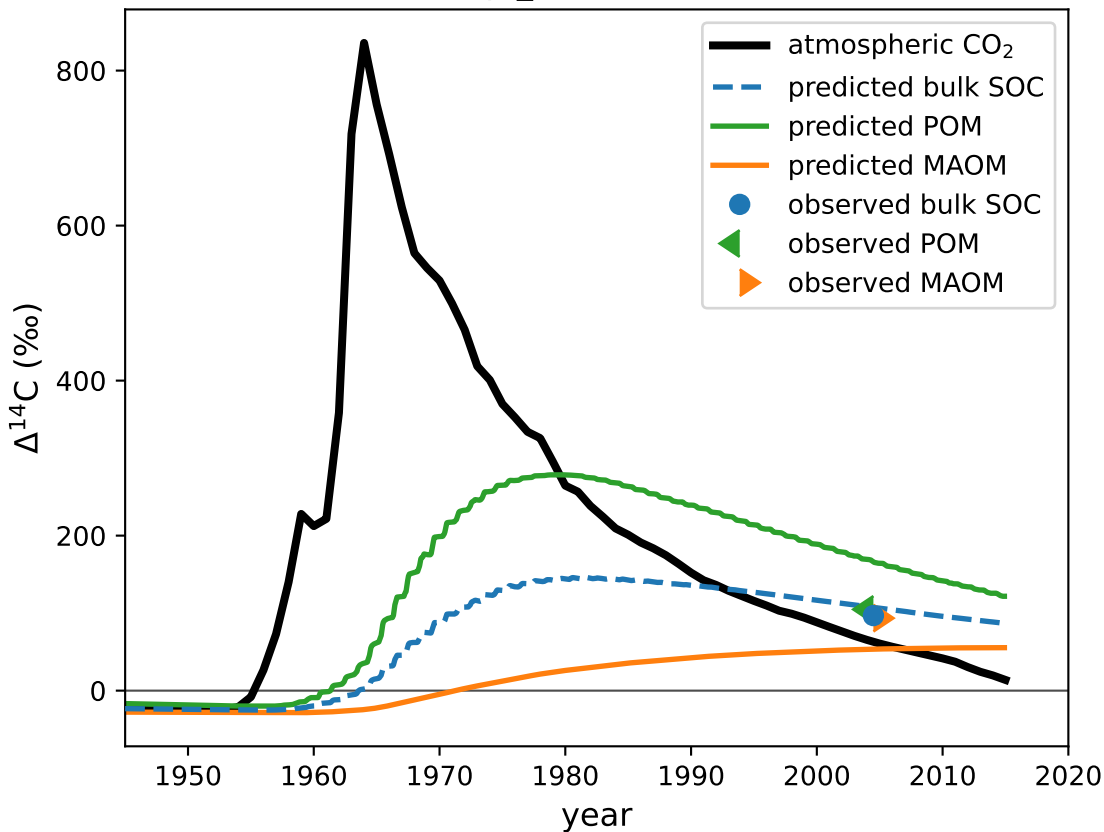

Supplement: Supplementary file 46 [file gmd-2023-242-supplement.zip]

SOMic  
McFarlane\_2013, NH Bartlett Forest, B2

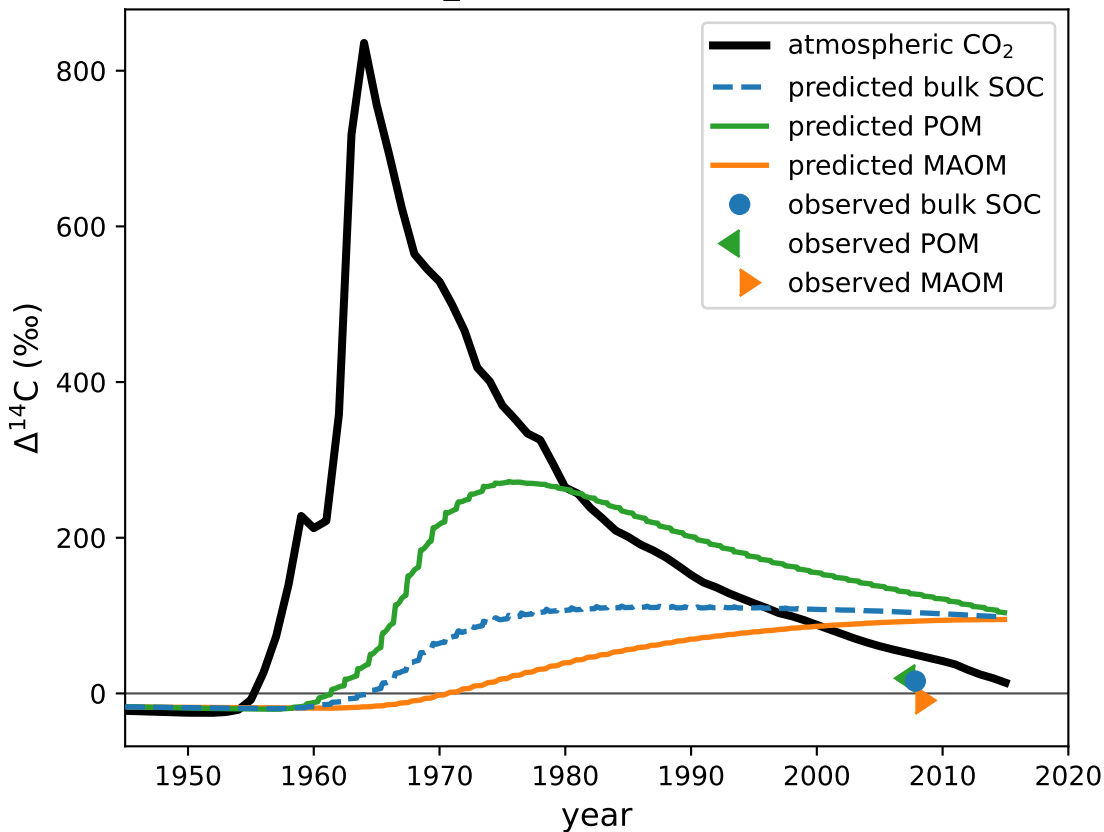

Supplement: Supplementary file 47 [file gmd-2023-242-supplement.zip]

MIMICS  
McFarlane\_2013, MI-Coarse UMBS, C7

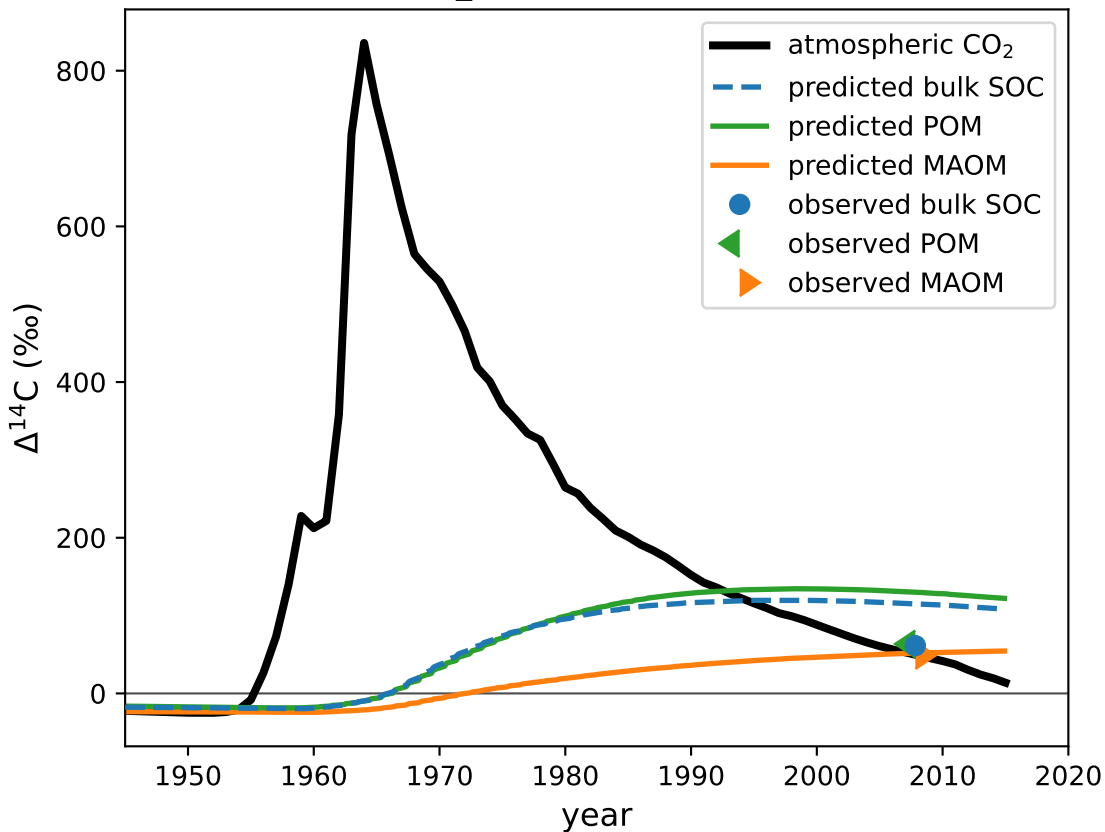

Supplement: Supplementary file 48 [file gmd-2023-242-supplement.zip]

Millennial  
McFarlane\_2013, MI-Coarse UMBS, C7

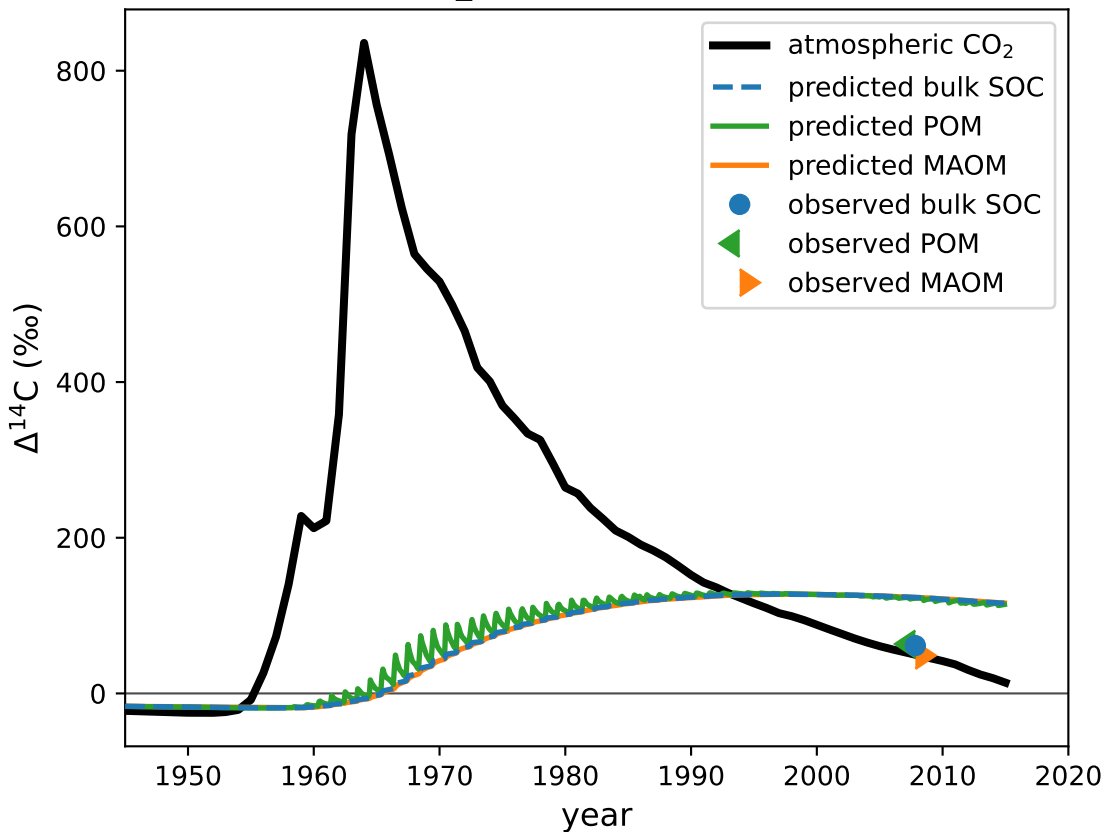

Supplement: Supplementary file 49 [file gmd-2023-242-supplement.zip]

Millennial  
Harden\_2002, Dinesen, DPPR2

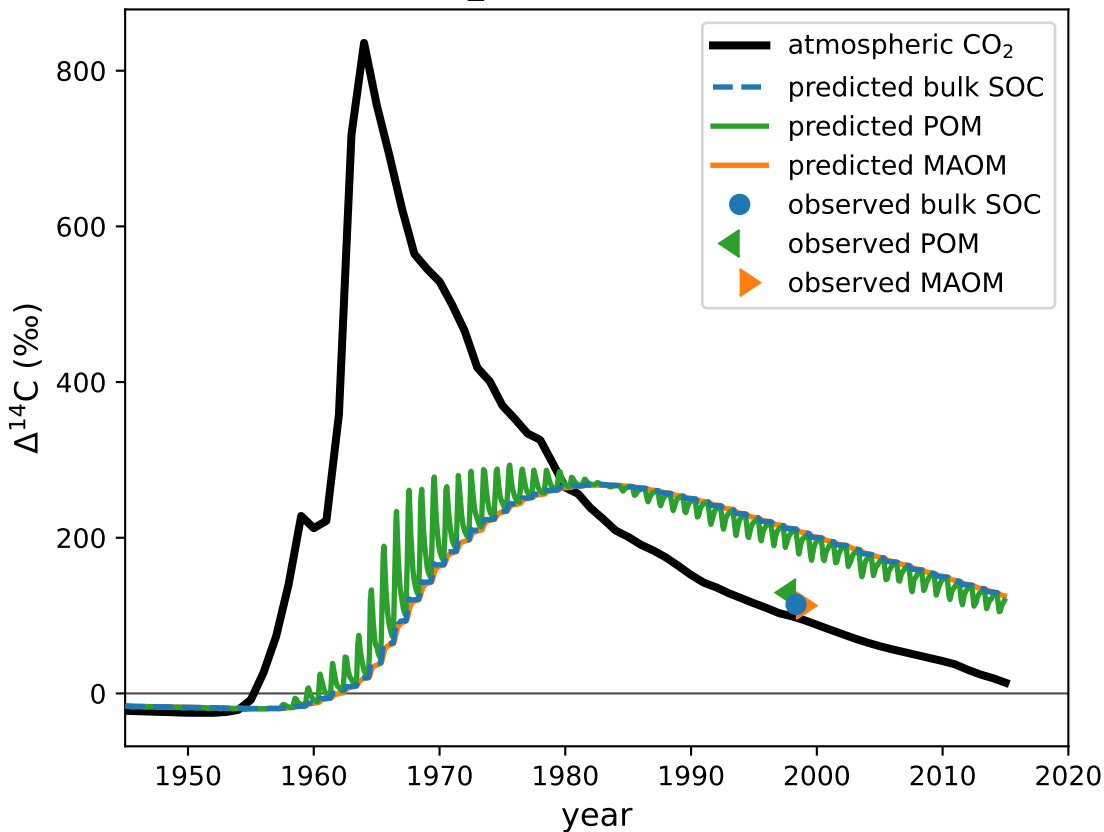

Supplement: Supplementary file 50 [file gmd-2023-242-supplement.zip]

CORPSE  
Marin-Spiotta\_2008, Sierra de Cayey, 10yr secondary forest

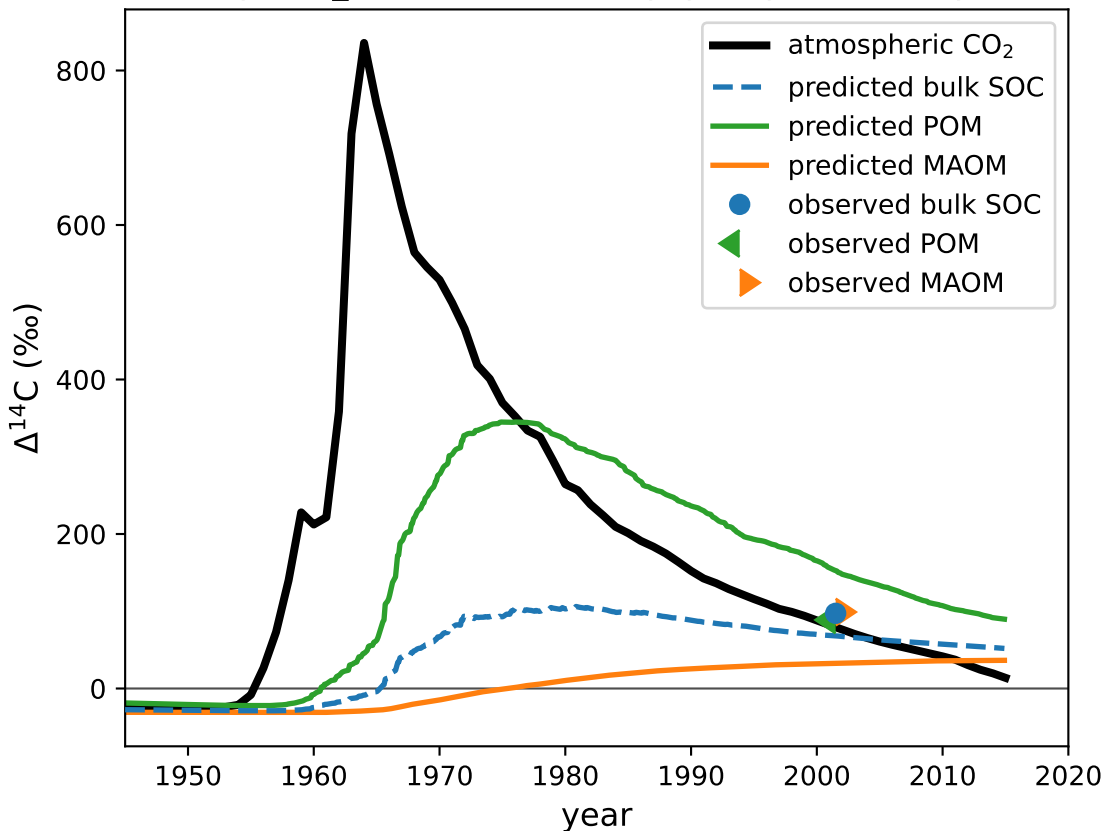

Supplement: Supplementary file 51 [file gmd-2023-242-supplement.zip]

SOMic  
McFarlane\_2013, MA Harvard Forest, H3

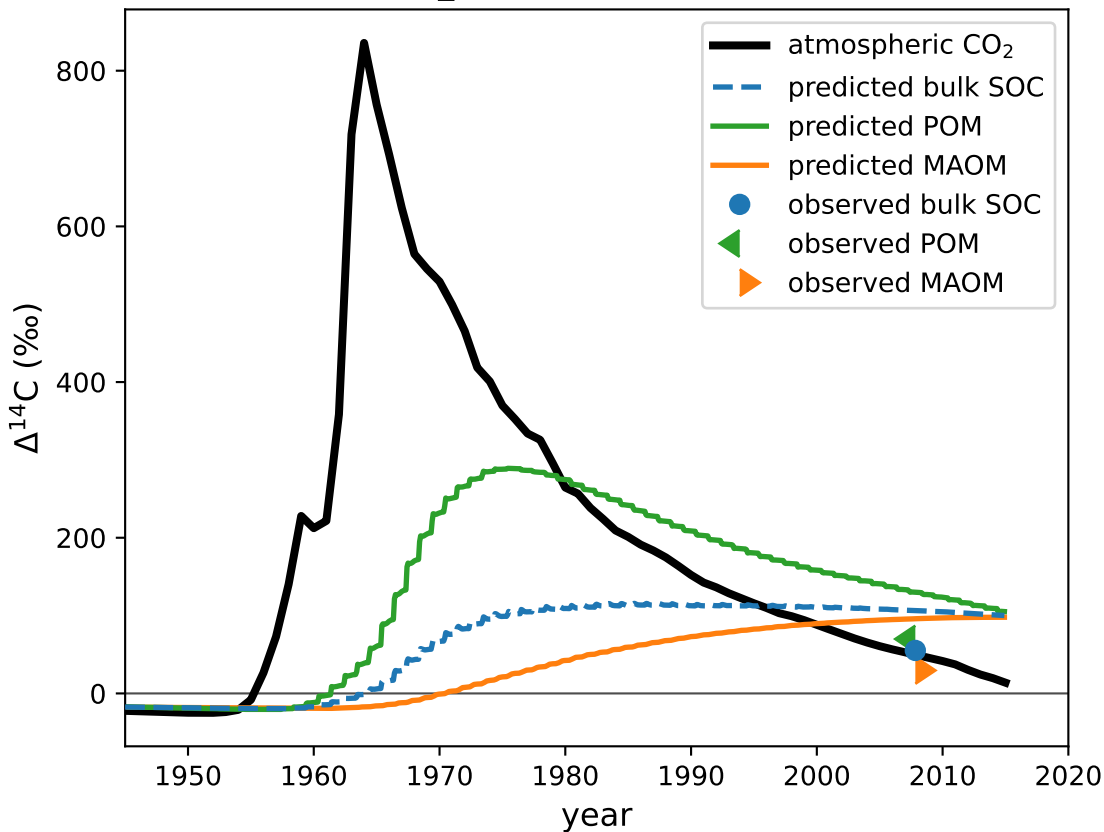

Supplement: Supplementary file 52 [file gmd-2023-242-supplement.zip]

MEND  
McFarlane\_2013, MA Harvard Forest, H5

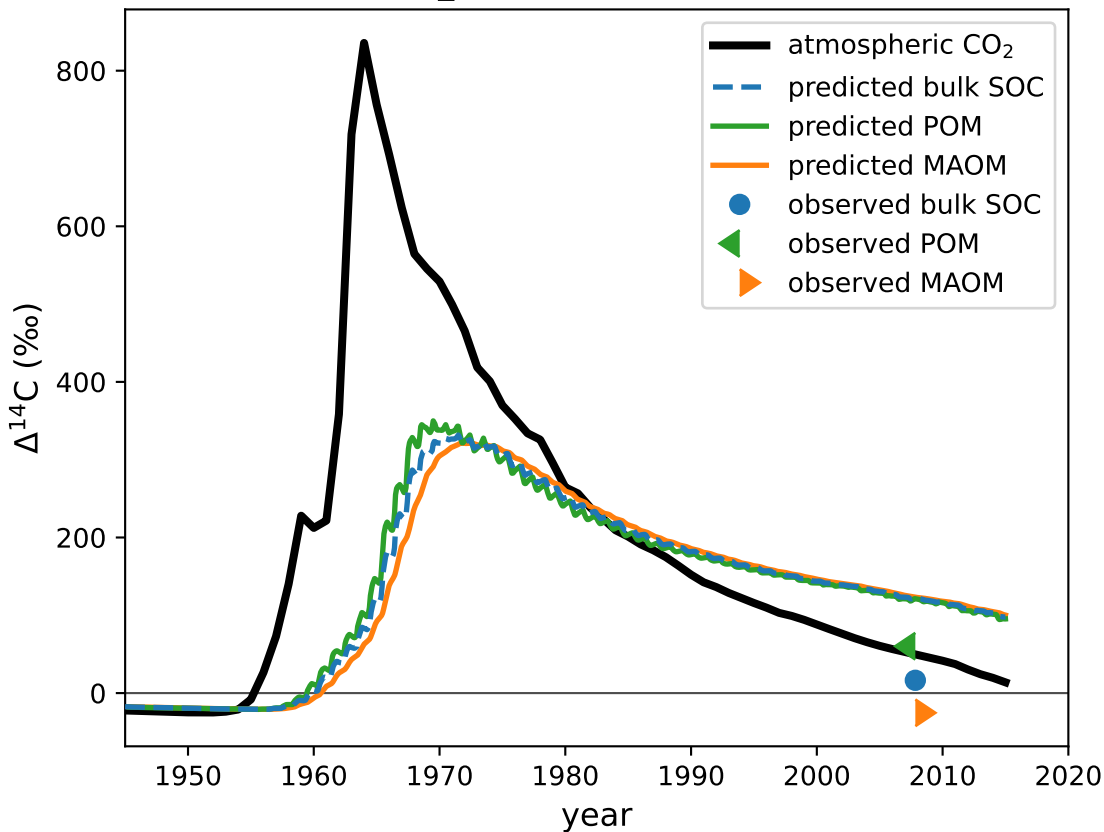

Supplement: Supplementary file 53 [file gmd-2023-242-supplement.zip]

MEND  
McFarlane\_2013, MO Ozark BREA, M5

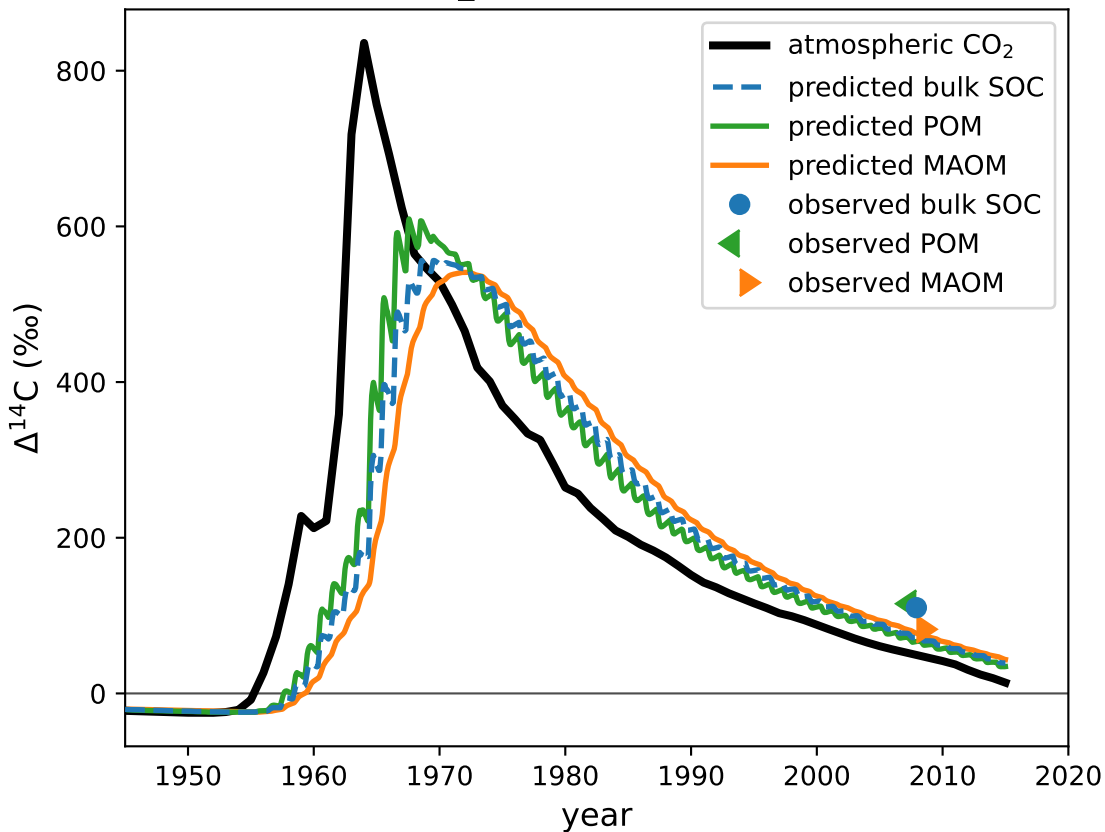

Supplement: Supplementary file 54 [file gmd-2023-242-supplement.zip]

CORPSE  
Schrumpf\_2013, Laqueuille, Laqueuille.1

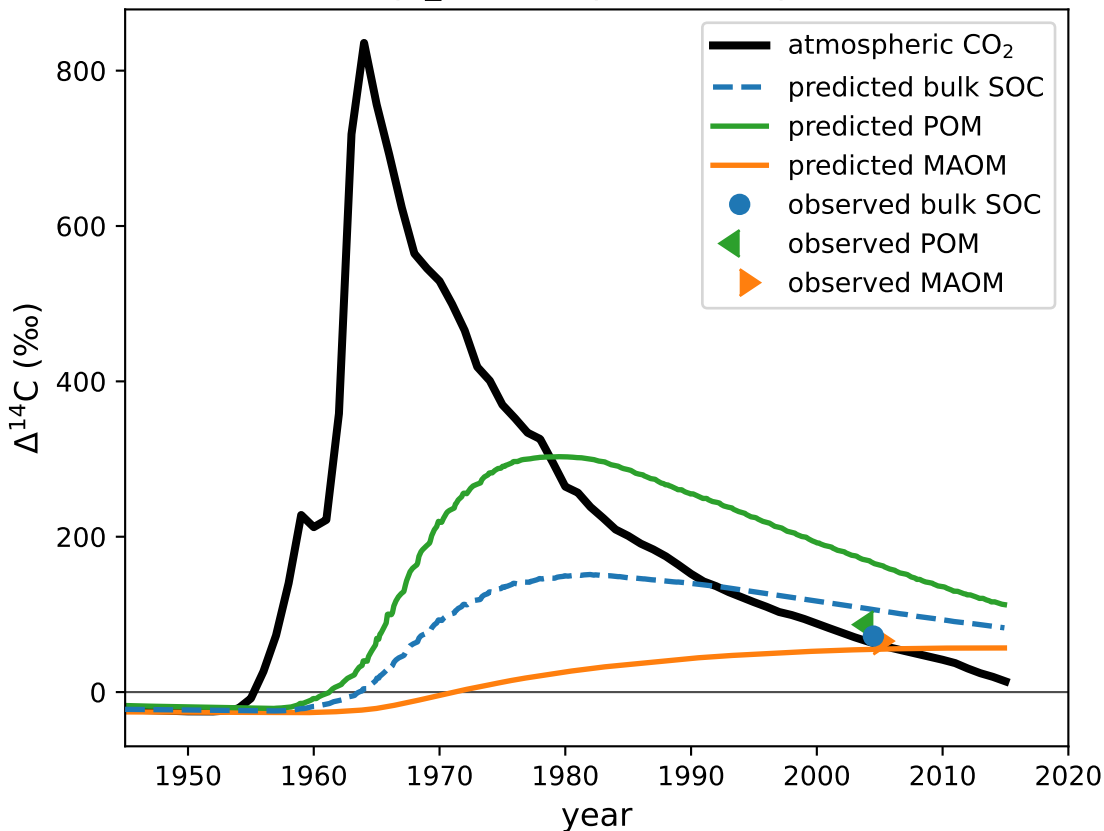

Supplement: Supplementary file 55 [file gmd-2023-242-supplement.zip]

CORPSE  
Baisden\_2002, China Hat, ChinaHat.1978

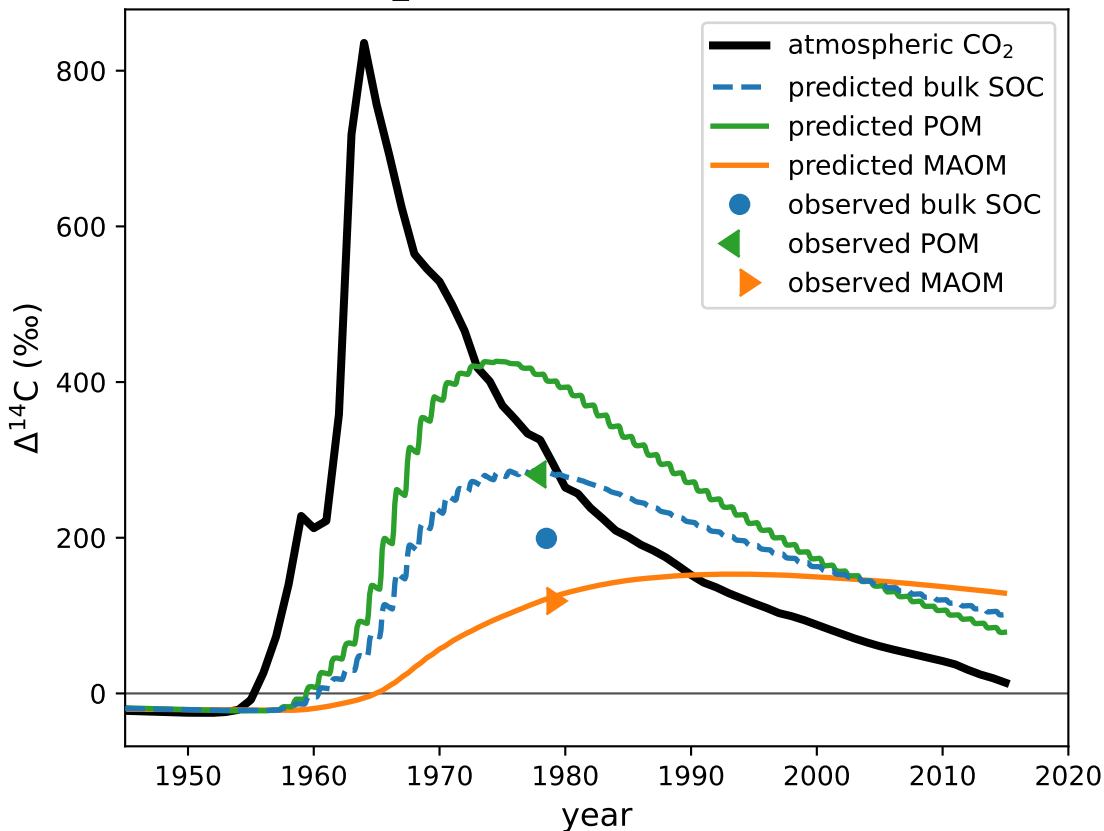

Supplement: Supplementary file 56 [file gmd-2023-242-supplement.zip]

Millennial  
Marin-Spiotta\_2008, Sierra de Cayey, 10yr secondary forest

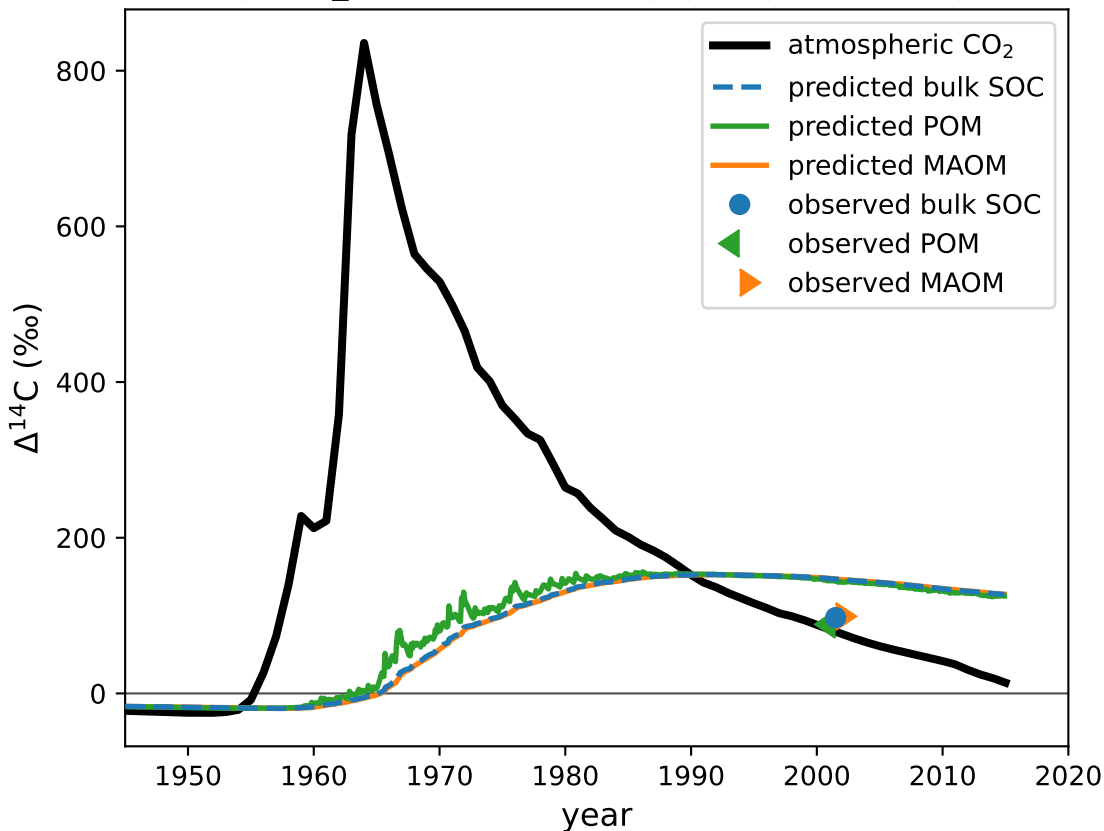

Supplement: Supplementary file 57 [file gmd-2023-242-supplement.zip]

MIMICS  
McFarlane\_2013, Mi-Fine Colonial Point, C2

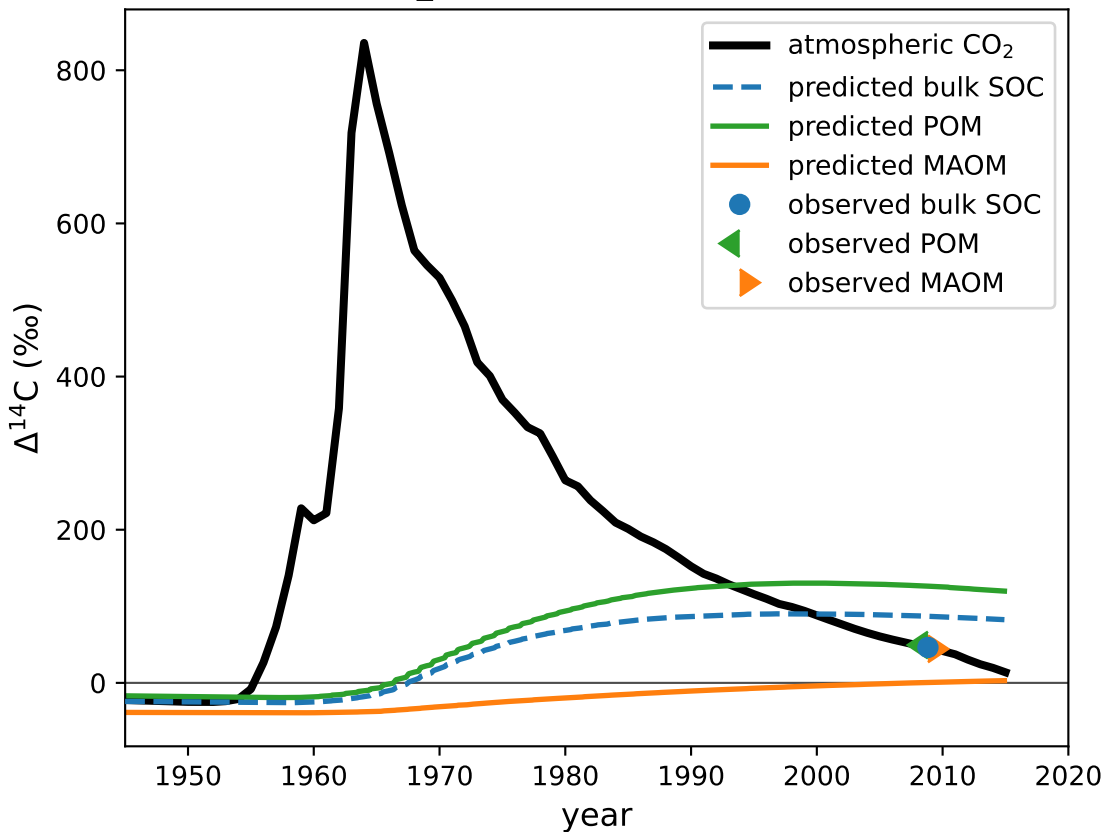

Supplement: Supplementary file 58 [file gmd-2023-242-supplement.zip]

SOMic  
McFarlane\_2013, MI-Coarse UMBS, O2

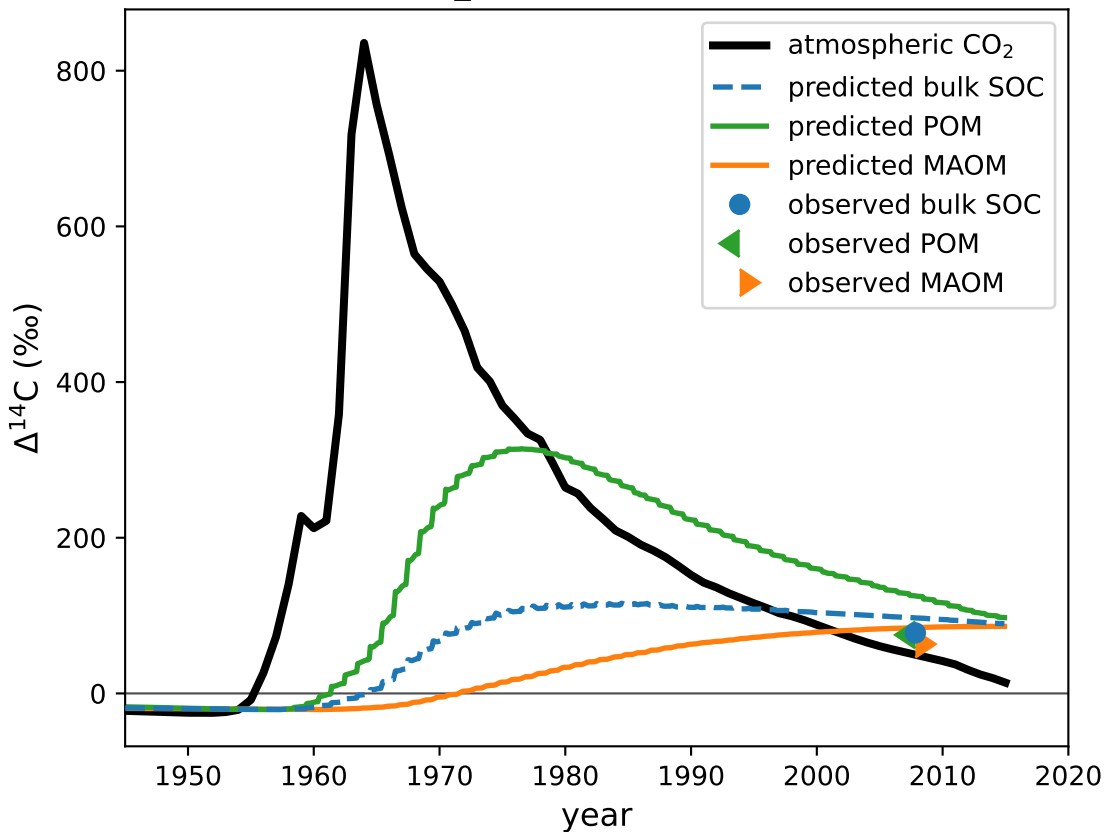

Supplement: Supplementary file 59 [file gmd-2023-242-supplement.zip]

MIMICS  
Baisden\_2002, China Hat, ChinaHat.1978

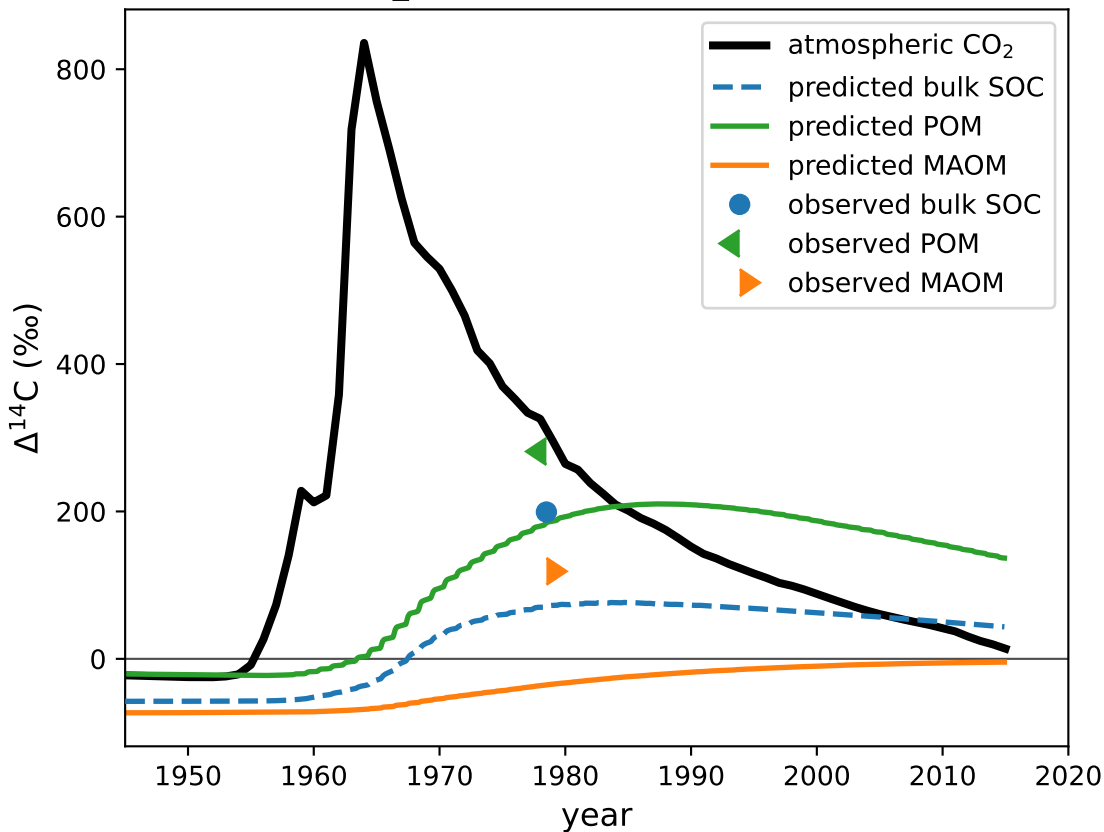

Supplement: Supplementary file 60 [file gmd-2023-242-supplement.zip]

SOMic  
McFarlane\_2013, MI-Coarse UMBS, C7

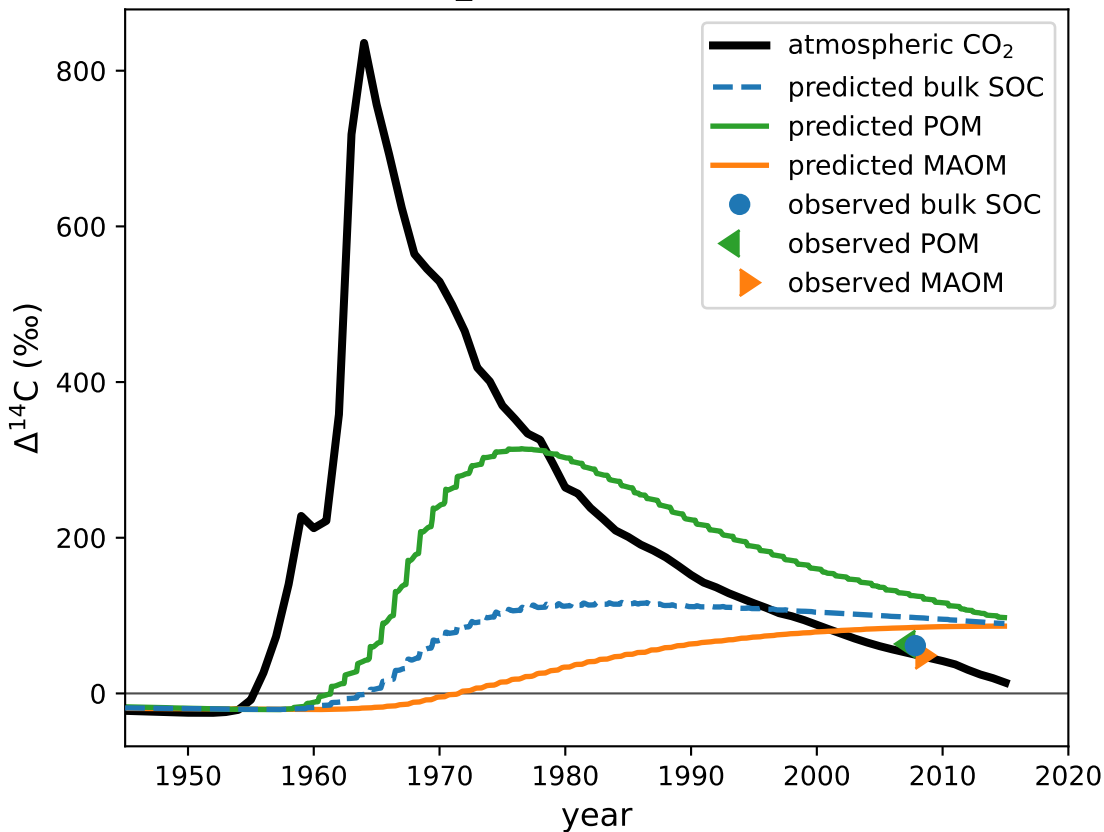

Supplement: Supplementary file 61 [file gmd-2023-242-supplement.zip]

CORPSE  
Berhe\_2012, Tennessee Valley, slope comp

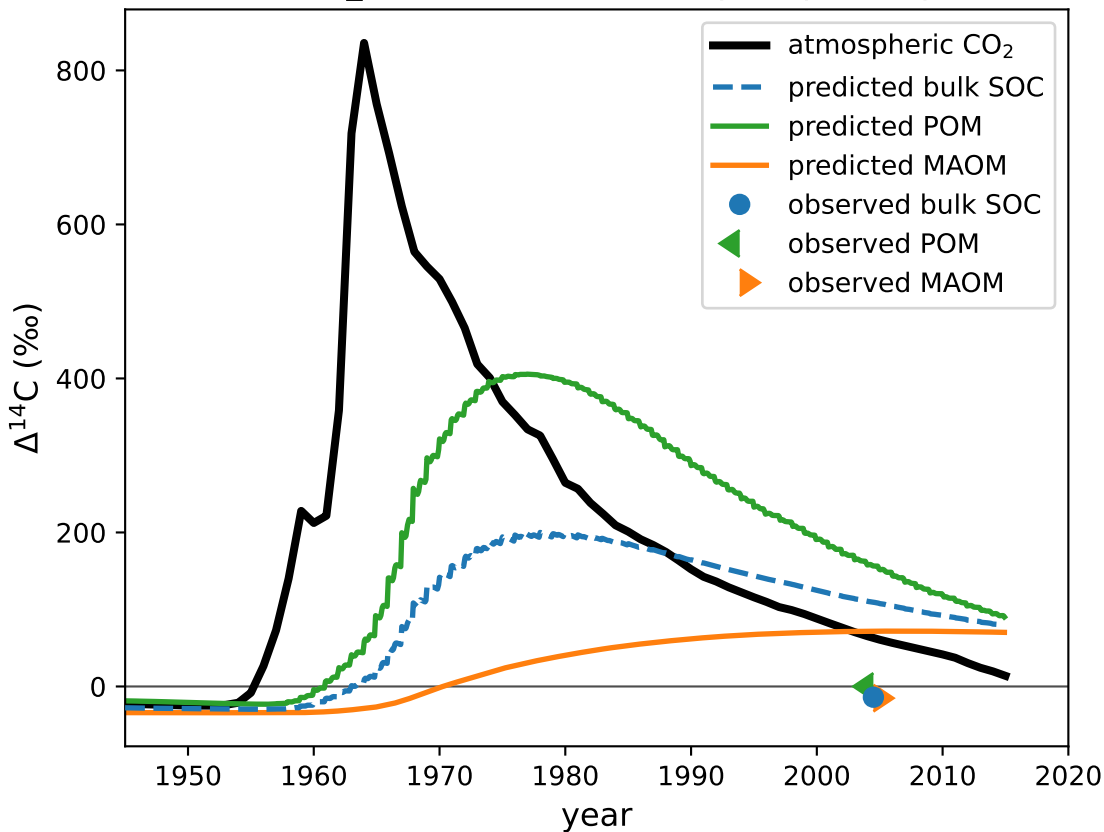

Supplement: Supplementary file 62 [file gmd-2023-242-supplement.zip]

MEND  
Berhe\_2012, Tennessee Valley, summit comp

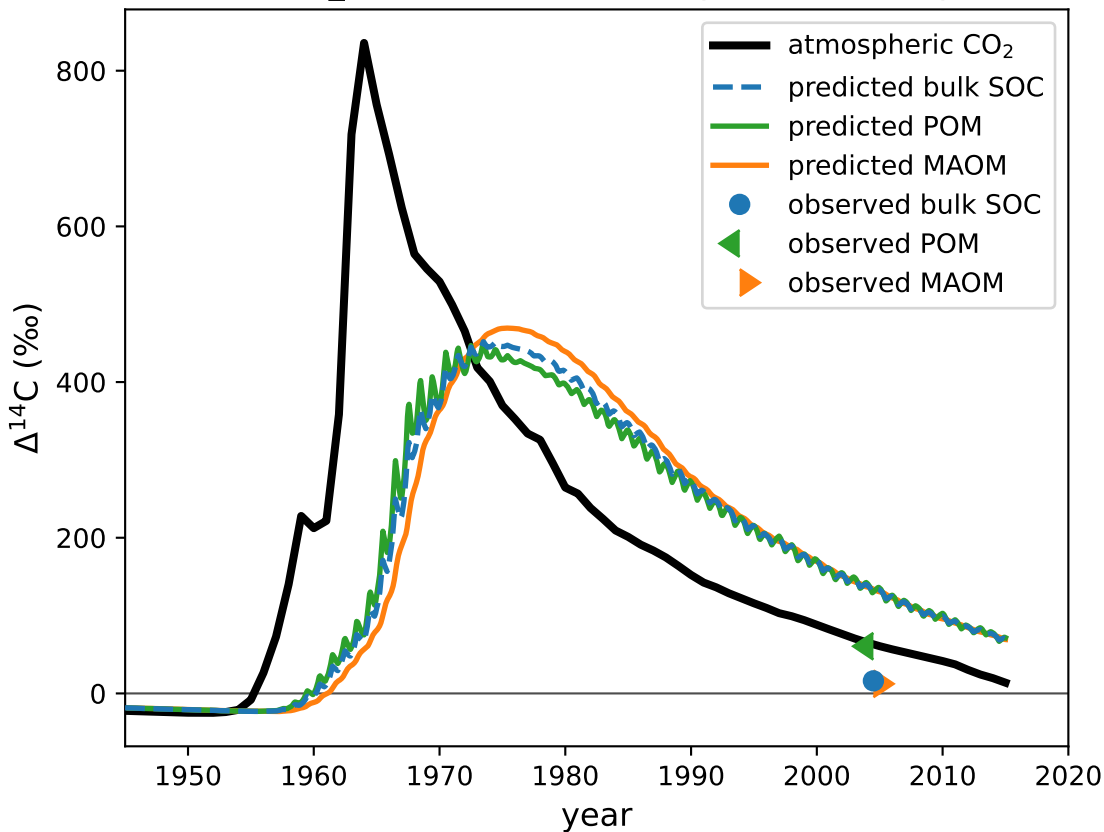

Supplement: Supplementary file 63 [file gmd-2023-242-supplement.zip]

SOMic  
McFarlane\_2013, MO Ozark BREA, M3

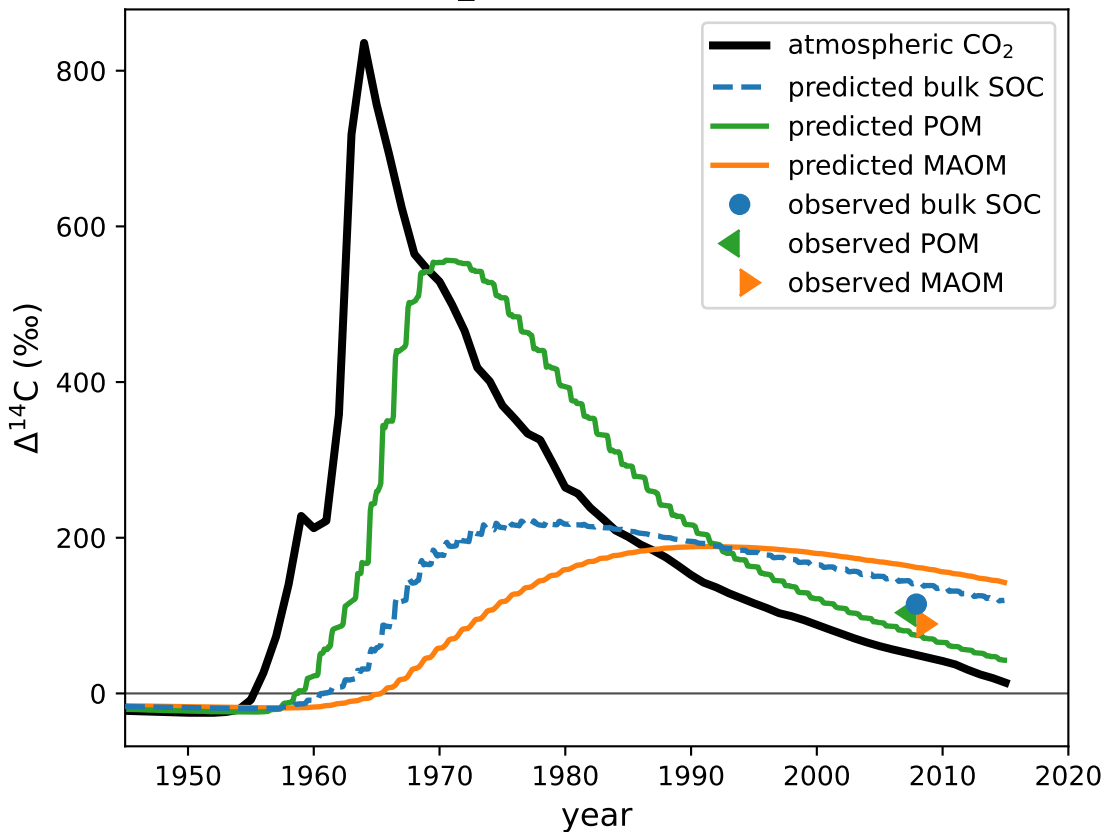

Supplement: Supplementary file 64 [file gmd-2023-242-supplement.zip]

SOMic  
McFarlane\_2013, MO Ozark BREA, M5

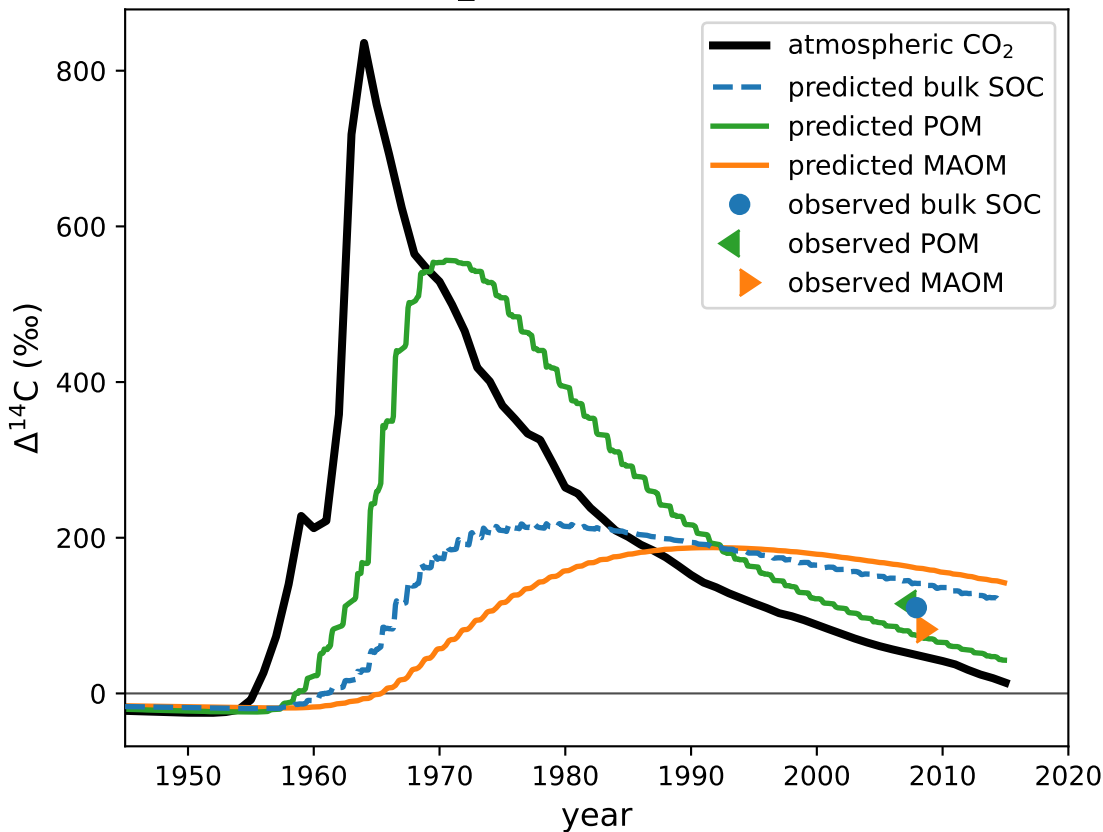

Supplement: Supplementary file 65 [file gmd-2023-242-supplement.zip]

MEND  
Berhe\_2012, Tennessee Valley, hollow comp

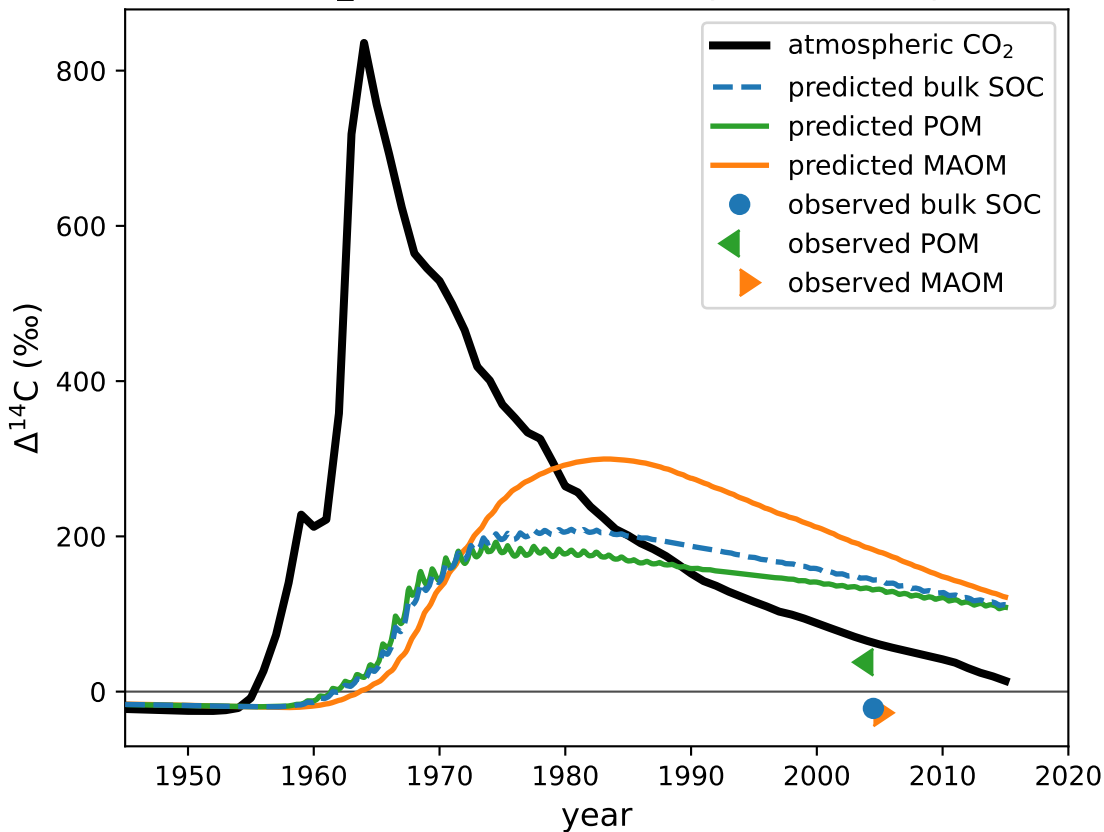

Supplement: Supplementary file 66 [file gmd-2023-242-supplement.zip]

Millennial  
Lemke\_2006, Solling, Solling\_DO\_F1

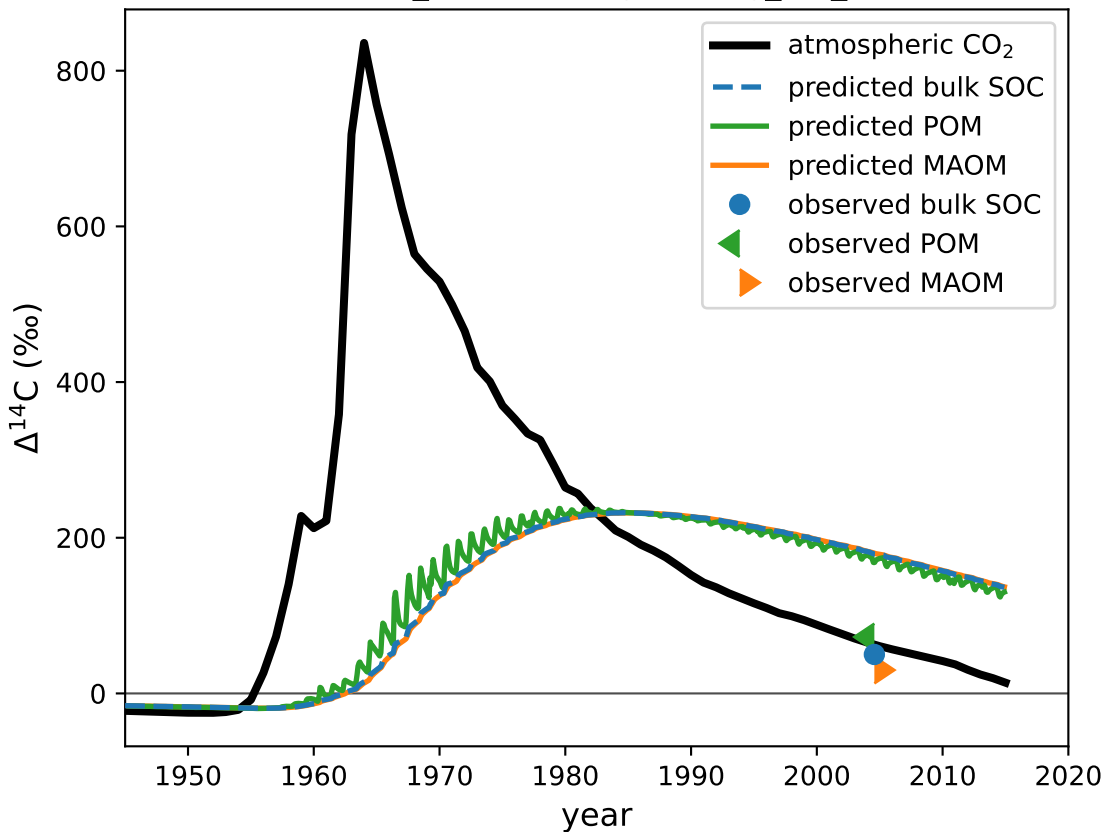

Supplement: Supplementary file 67 [file gmd-2023-242-supplement.zip]

(a) Bulk SOC  $\Delta^{14}\text{C}$

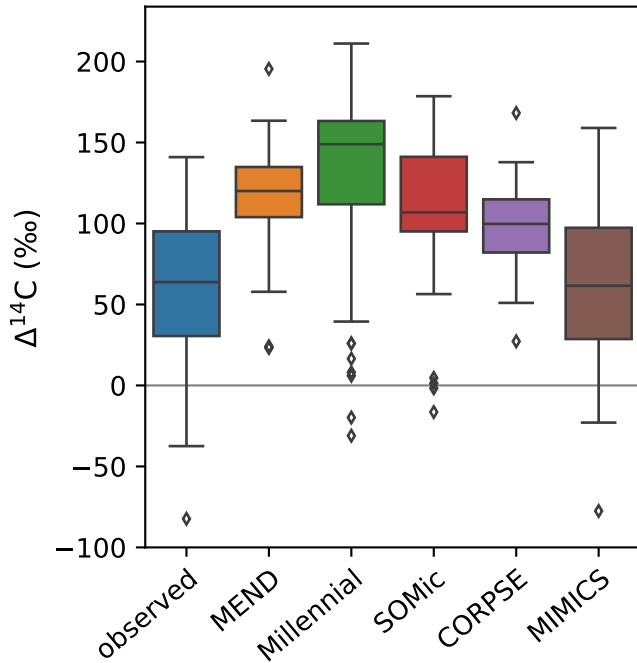

(b) POM  $\Delta^{14}\text{C}$

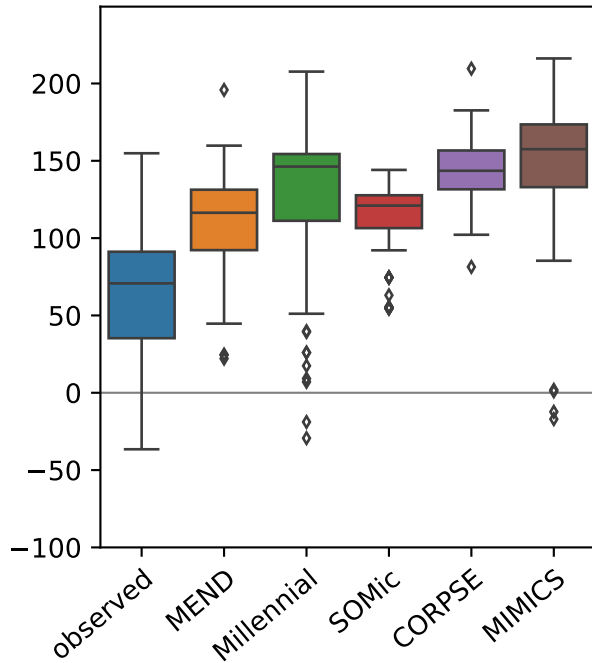

(c) MAOM  $\Delta^{14}\text{C}$

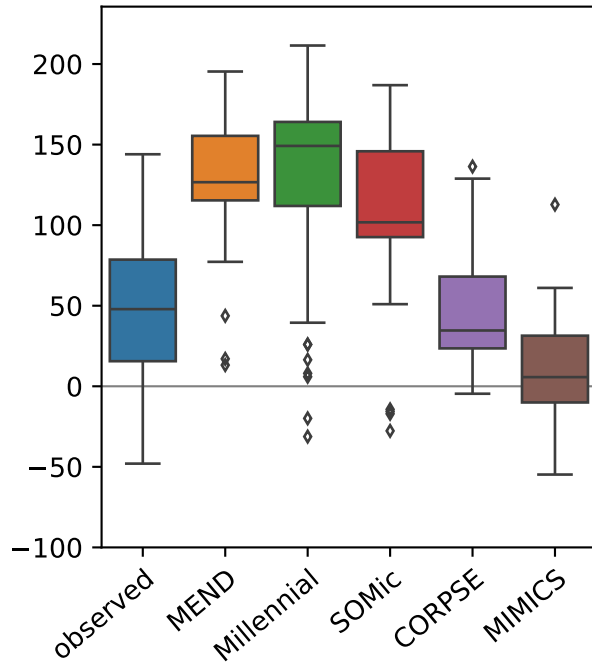

Supplement: Supplementary file 68 [file gmd-2023-242-supplement.zip]

Millennial  
Meyer\_2012, Stubai, Meadow

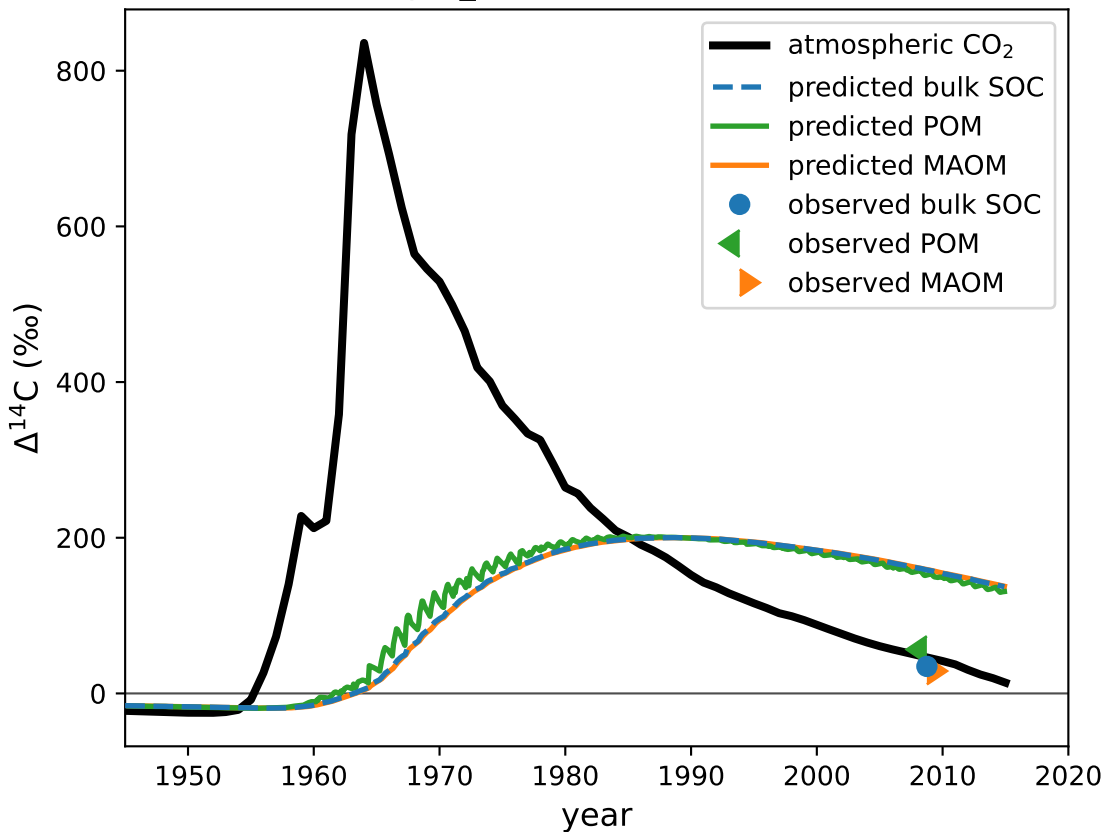

Supplement: Supplementary file 69 [file gmd-2023-242-supplement.zip]

MEND  
Schrumpf\_2013, Laqueuille, Laqueuille.1

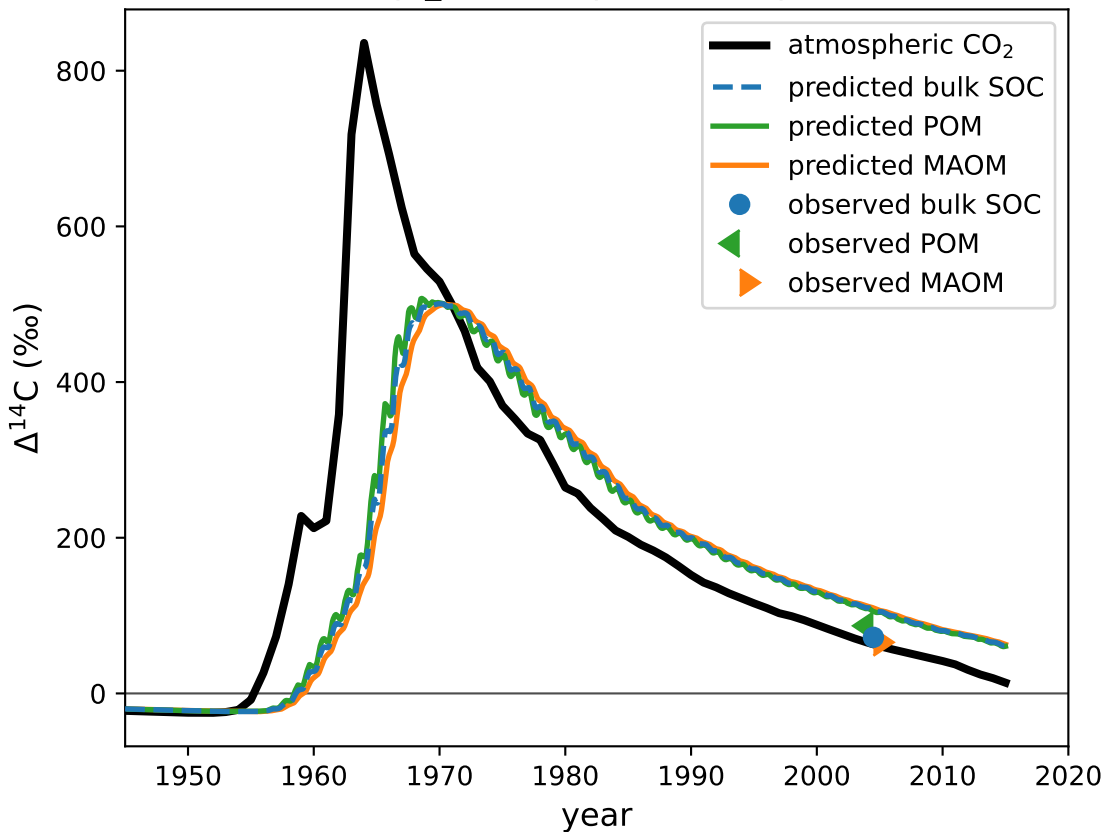

Supplement: Supplementary file 70 [file gmd-2023-242-supplement.zip]

MEND  
McFarlane\_2013, NH Bartlett Forest, B2

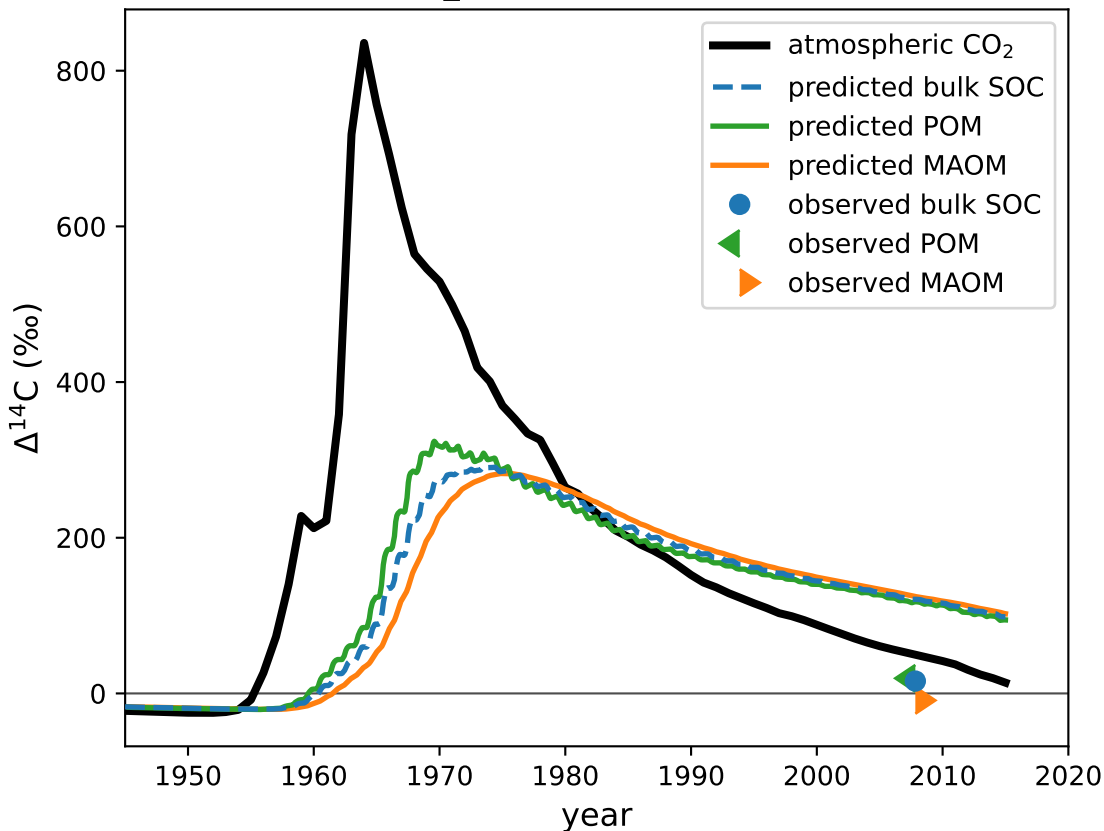

Supplement: Supplementary file 71 [file gmd-2023-242-supplement.zip]

Millennial  
Rasmussen\_2018, BSwf, BSwf

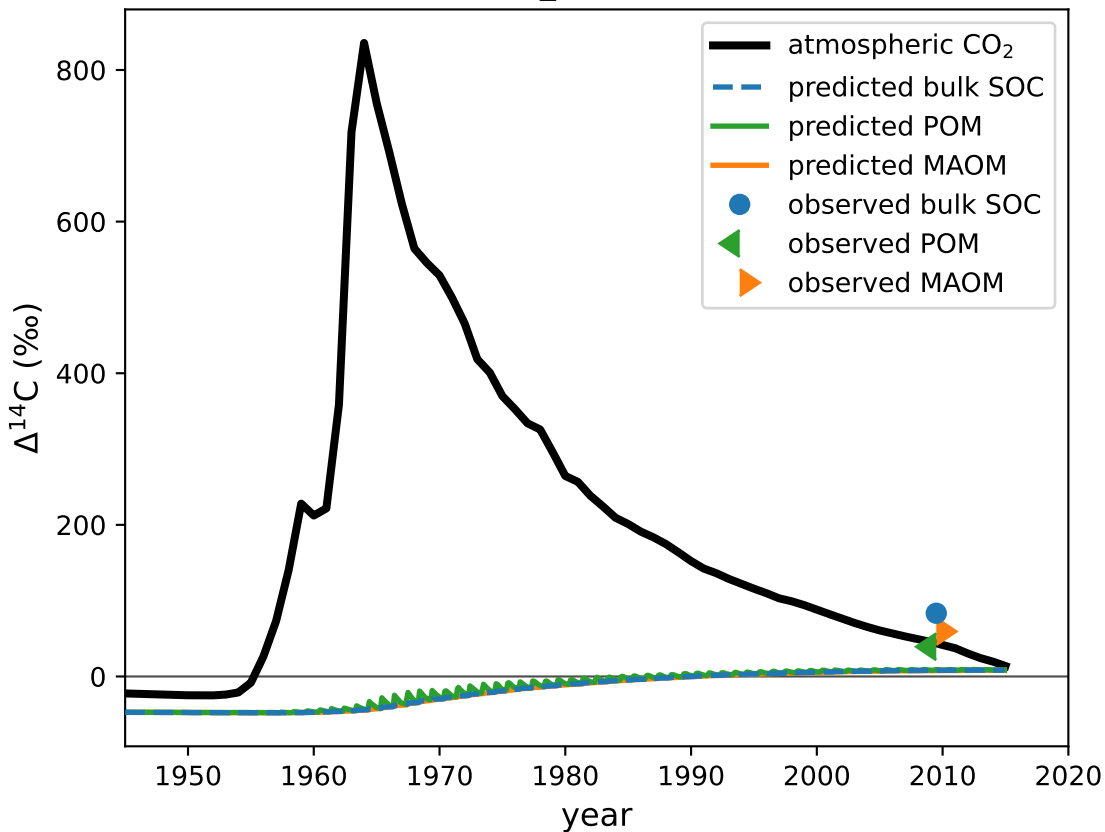

Supplement: Supplementary file 72 [file gmd-2023-242-supplement.zip]

SOMic  
Lemke\_2006, Solling, Solling\_DO\_F3

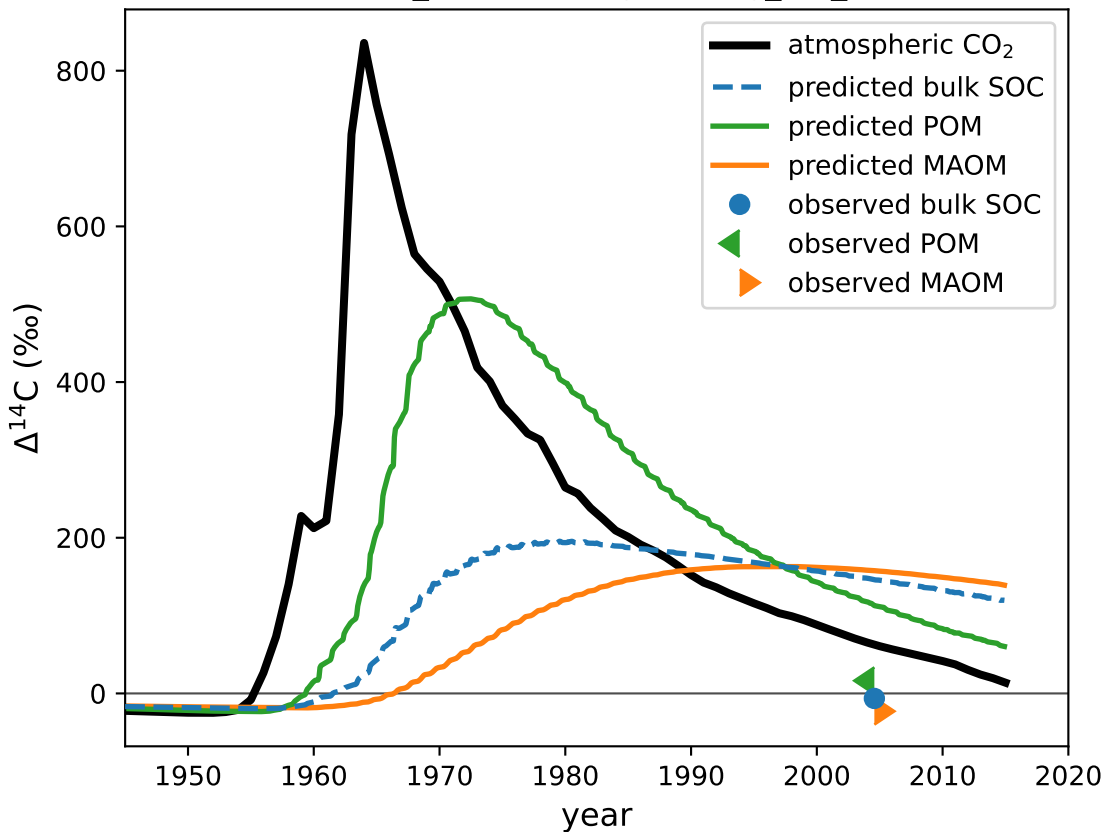

Supplement: Supplementary file 73 [file gmd-2023-242-supplement.zip]

MEND  
Marin-Spiotta\_2008, Sierra de Cayey, Active pastures

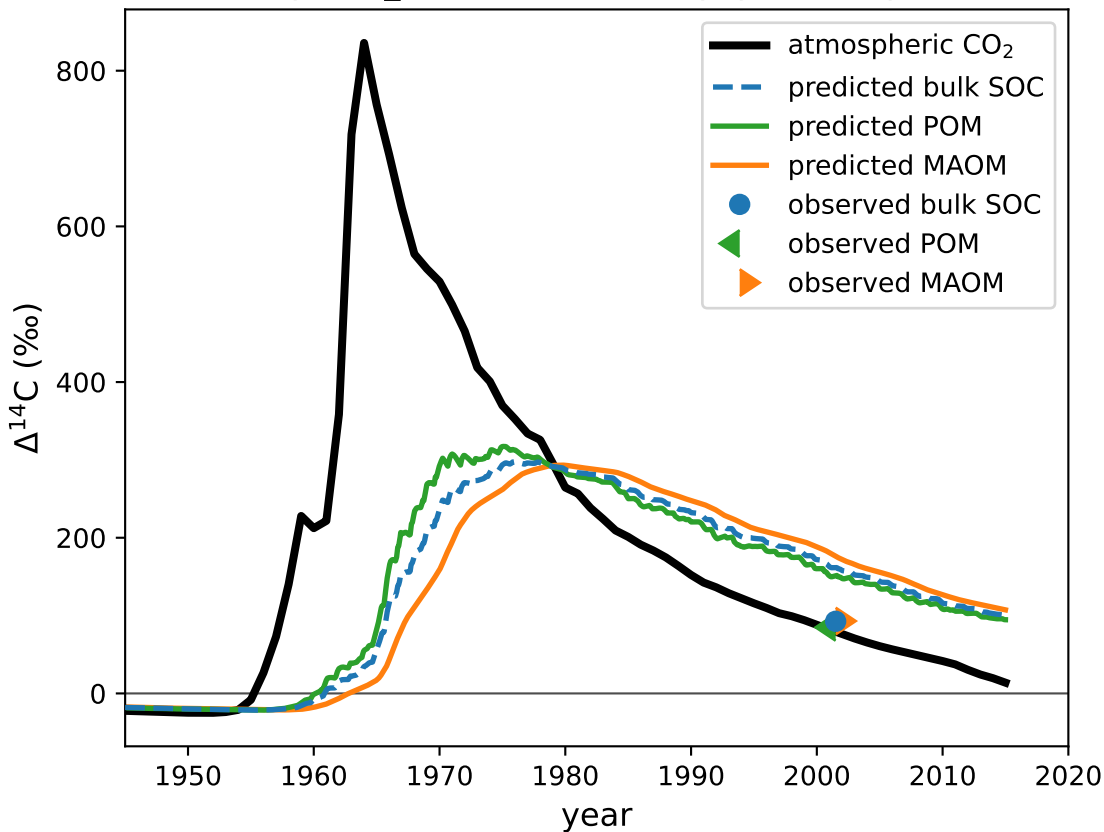

Supplement: Supplementary file 74 [file gmd-2023-242-supplement.zip]

MEND  
Schrumpf\_2013, Carlow, Carlow.1

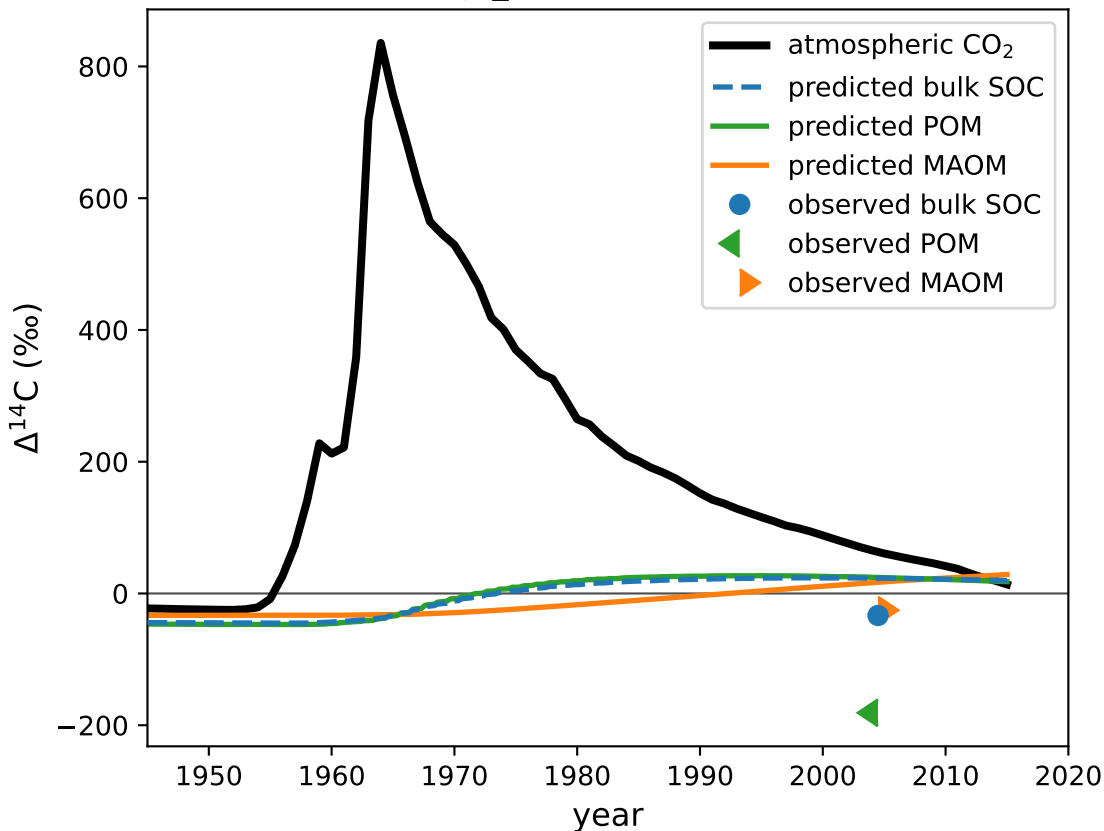

Supplement: Supplementary file 75 [file gmd-2023-242-supplement.zip]

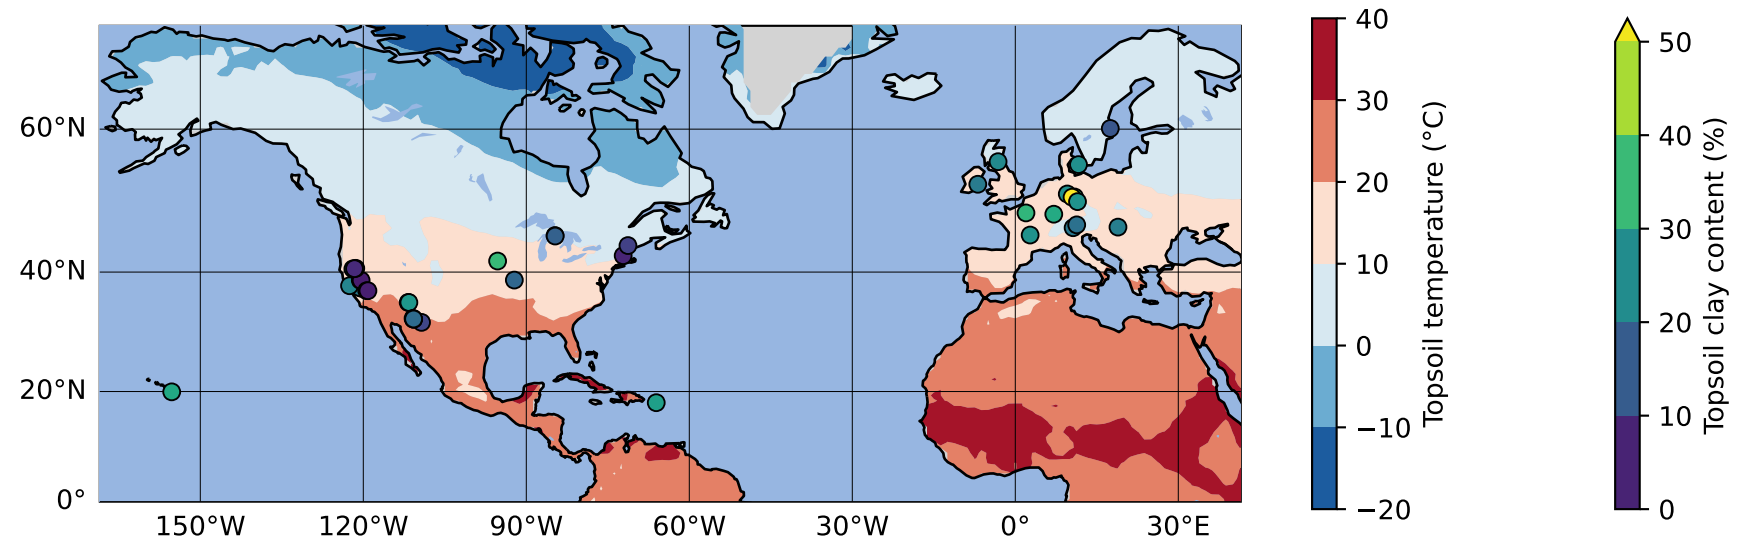

Supplement: Supplementary file 76 [file gmd-2023-242-supplement.zip]

CORPSE  
Rasmussen\_2018, GRwf, GRwf

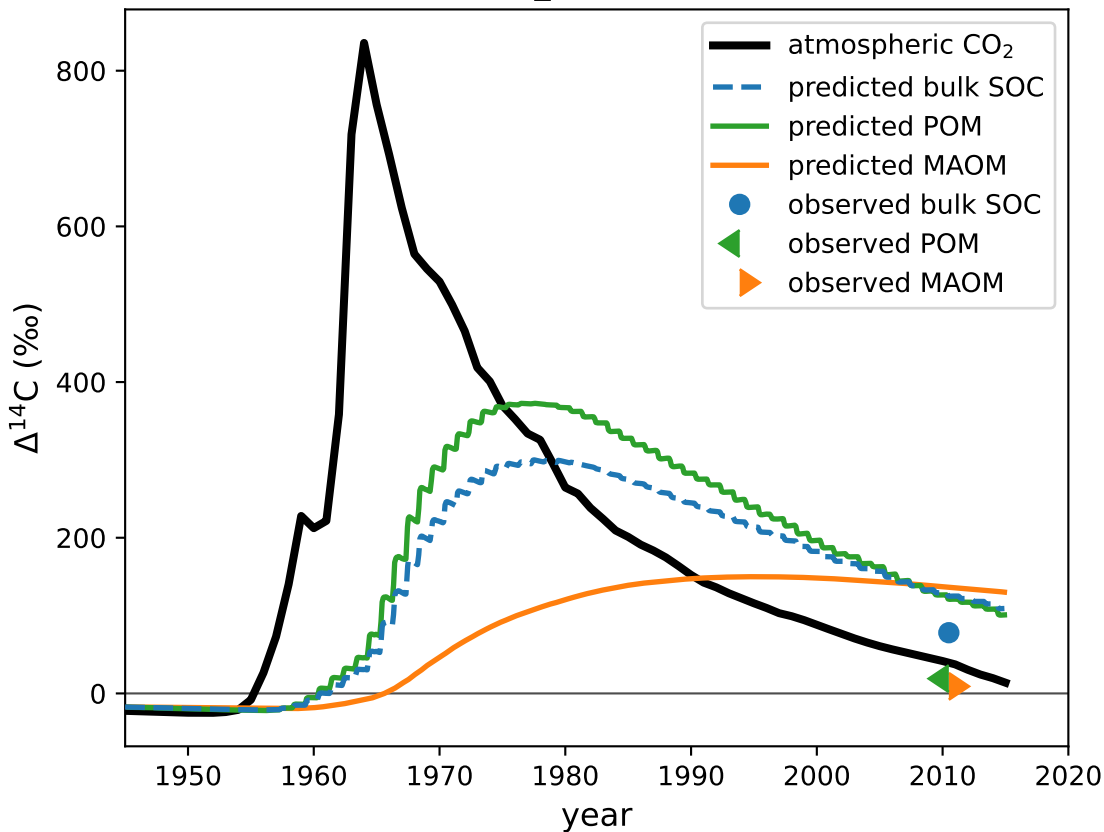

Supplement: Supplementary file 77 [file gmd-2023-242-supplement.zip]

CORPSE  
Lybrand\_2017, Catalina CZO desert, desert scrub\_divergent

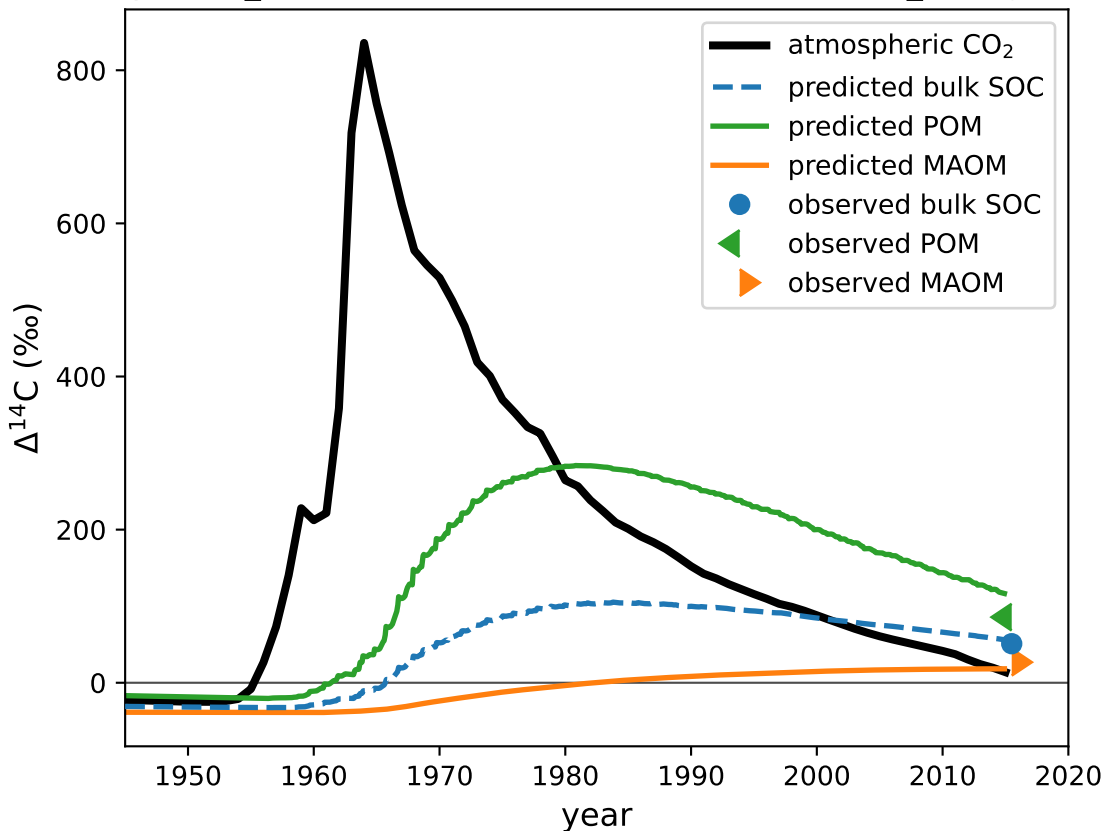

Supplement: Supplementary file 78 [file gmd-2023-242-supplement.zip]

CORPSE  
Heckman\_2010, Mt. Lemmon Granite, MLGR\_composite

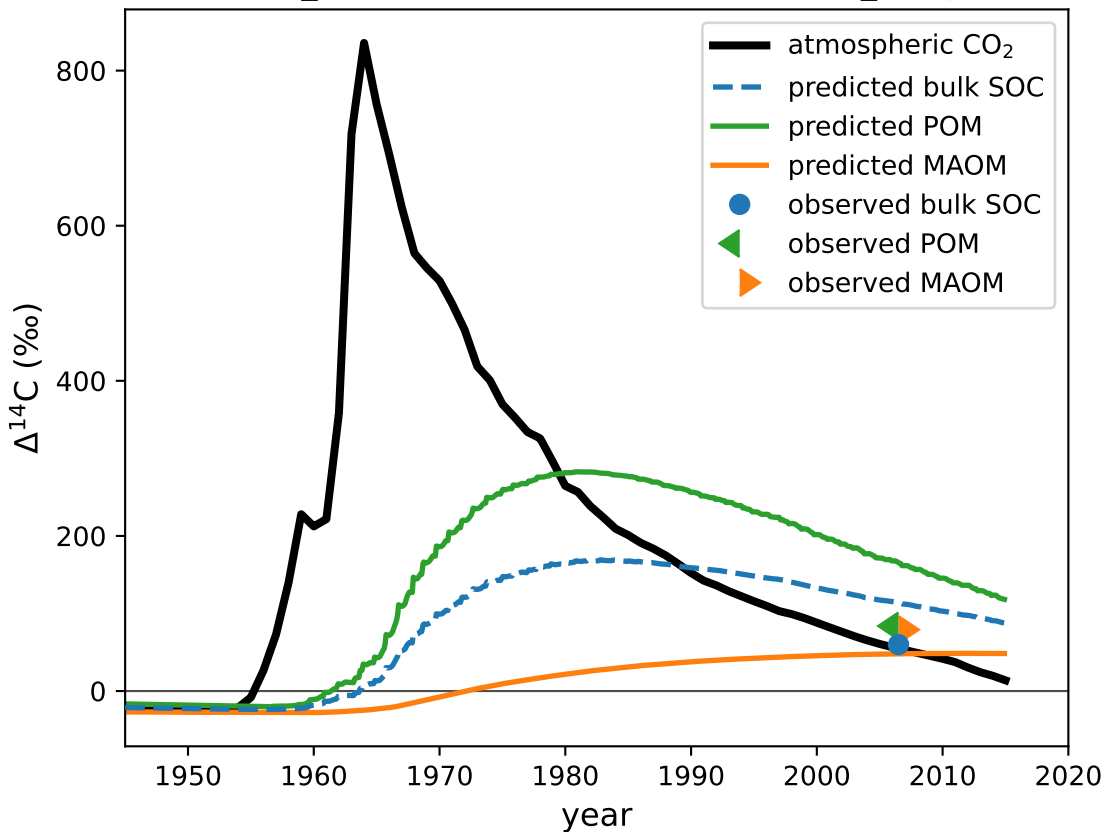

Supplement: Supplementary file 79 [file gmd-2023-242-supplement.zip]

SOMic  
Schrumpf\_2013, Laqueuille, Laqueuille.1

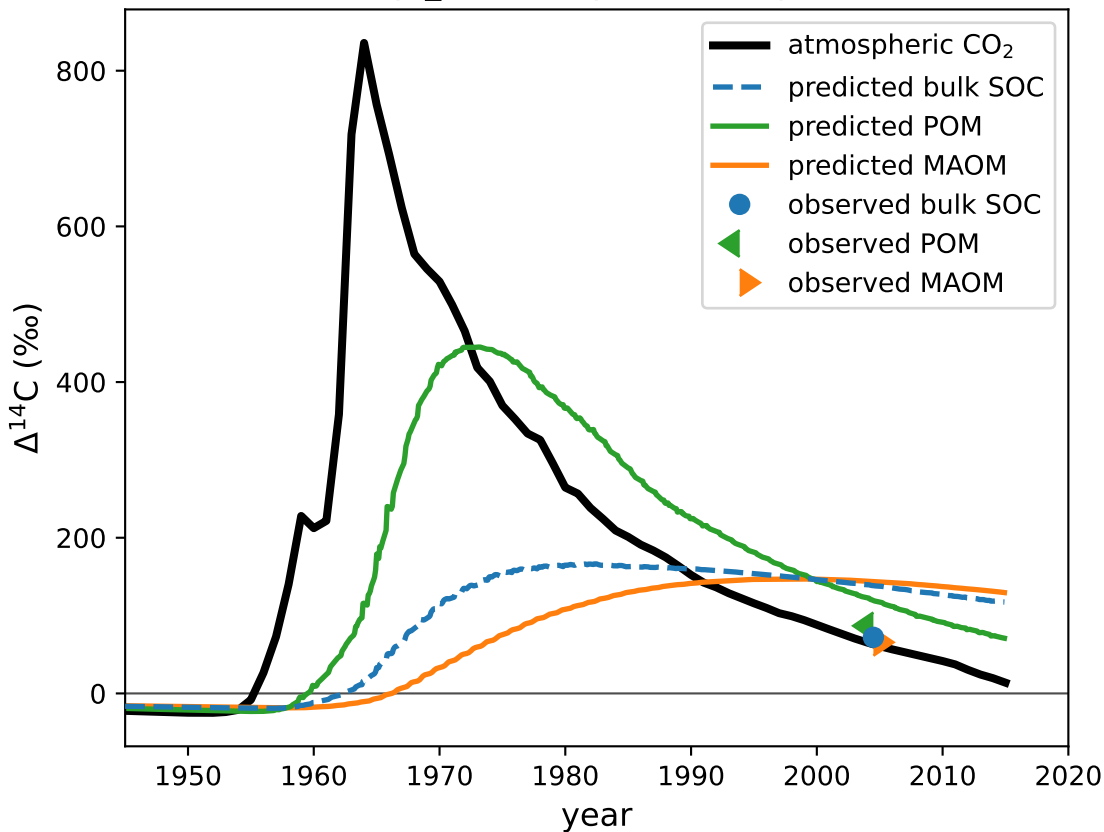

Supplement: Supplementary file 80 [file gmd-2023-242-supplement.zip]

MIMICS  
McFarlane\_2013, MI-Coarse UMBS, O2

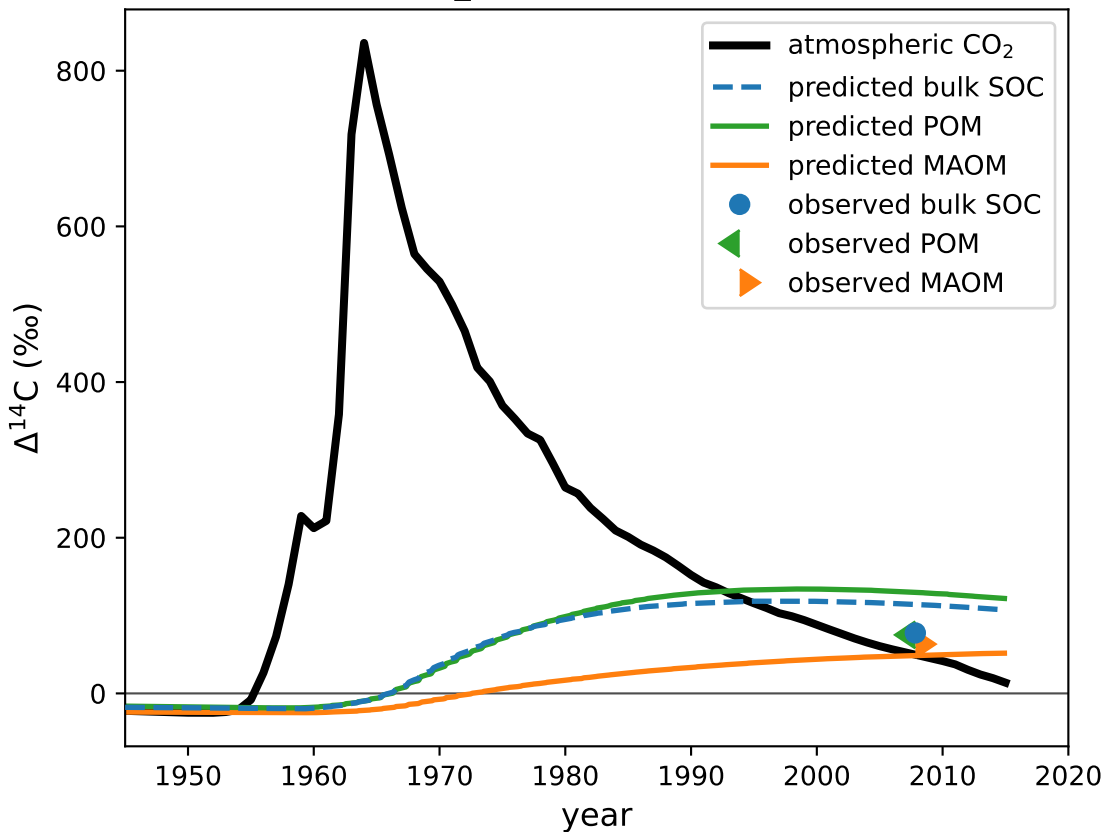

Supplement: Supplementary file 81 [file gmd-2023-242-supplement.zip]

SOMic  
Marin-Spiotta\_2008, Sierra de Cayey, Primary forest

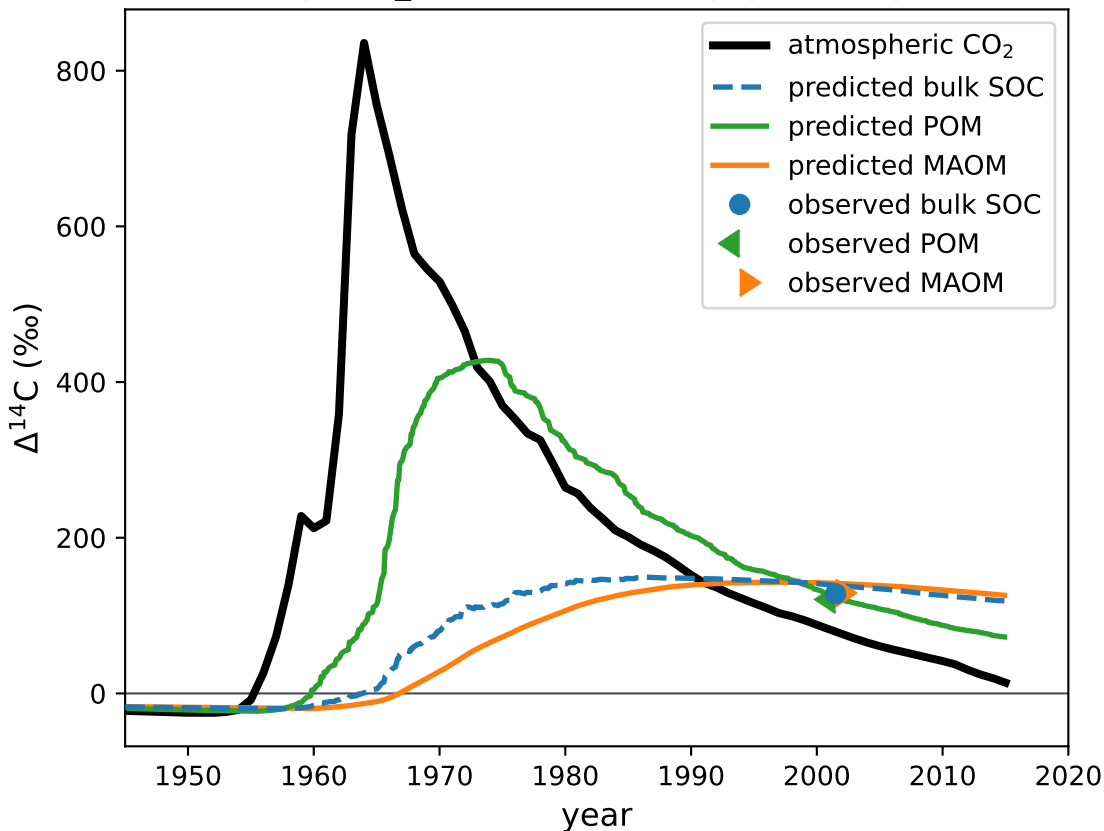

Supplement: Supplementary file 82 [file gmd-2023-242-supplement.zip]

MEND  
Baisden\_2002, Riverbank, Riverbank.1997

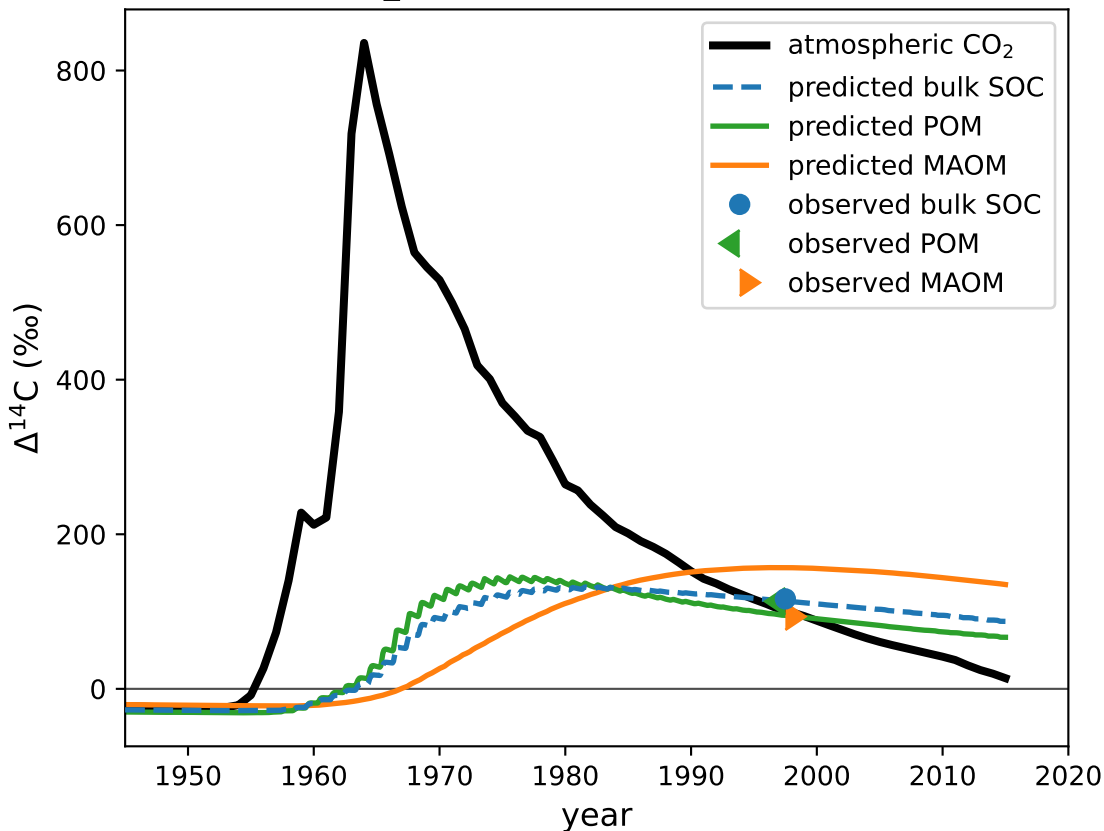

Supplement: Supplementary file 83 [file gmd-2023-242-supplement.zip]

SOMic  
Rasmussen\_2018, BSrf, BSrf

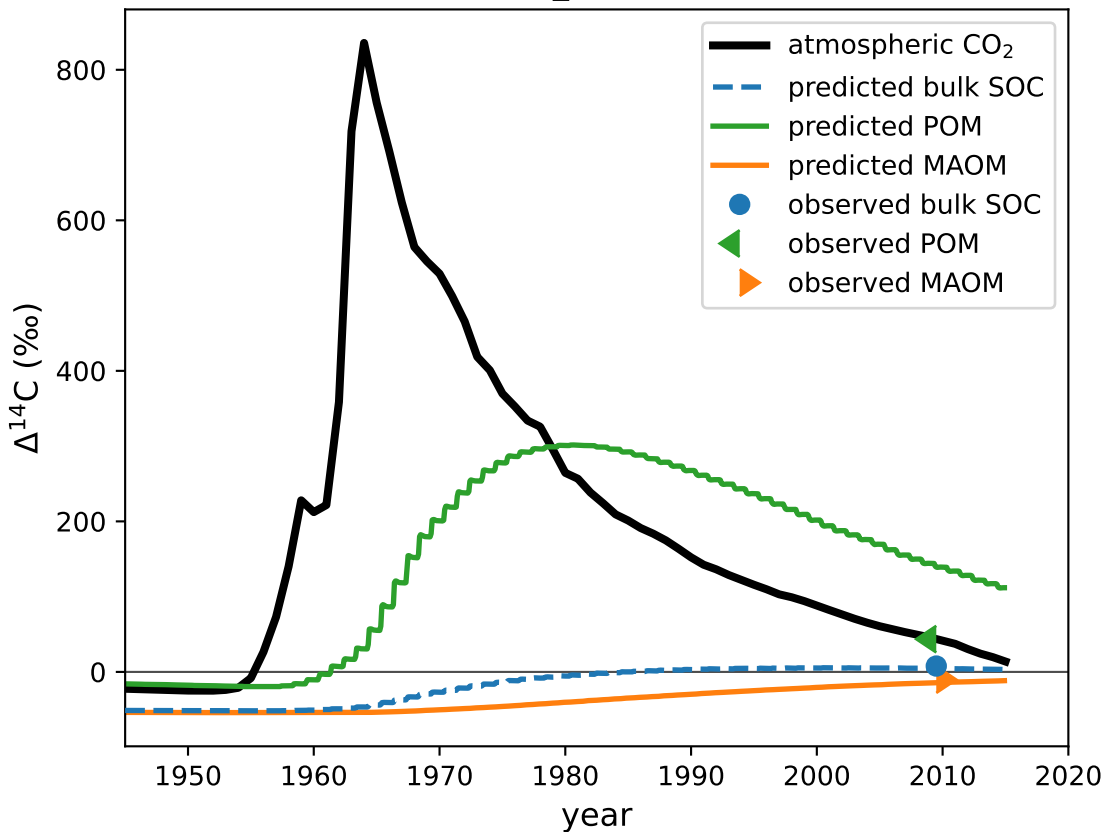

Supplement: Supplementary file 84 [file gmd-2023-242-supplement.zip]

MEND  
Rasmussen\_2018, ANwf, ANwf

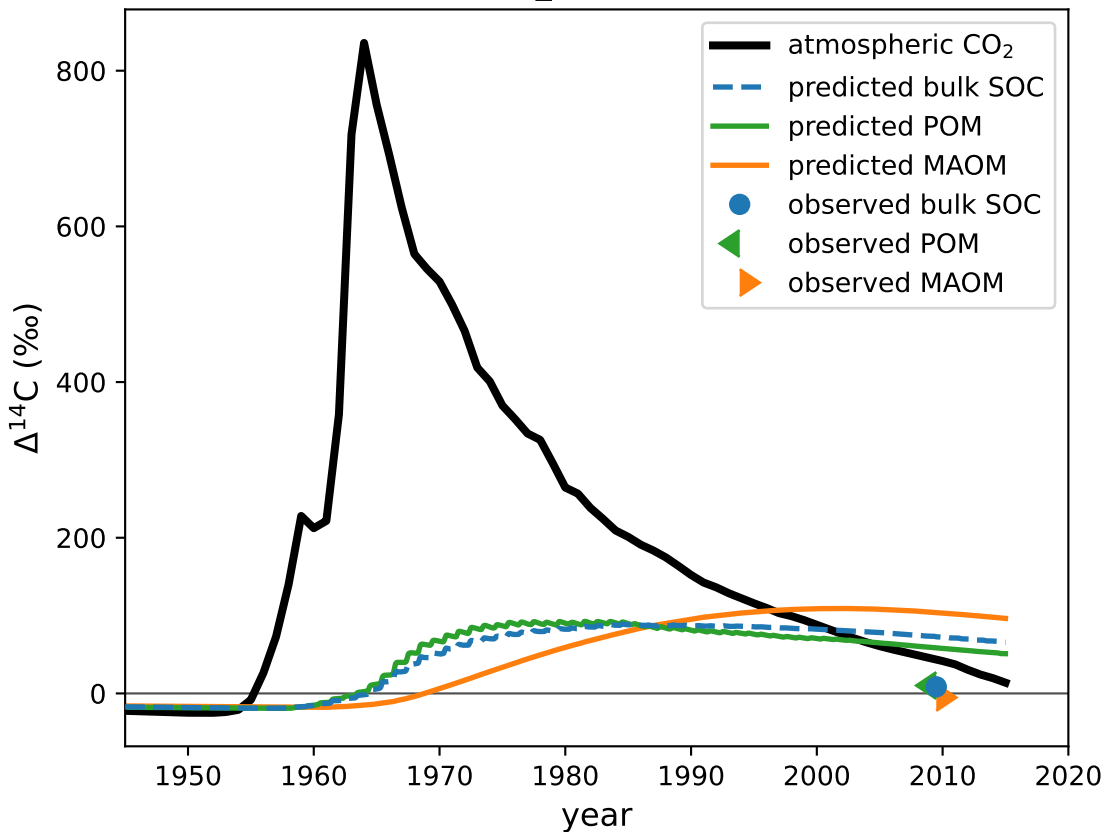

Supplement: Supplementary file 85 [file gmd-2023-242-supplement.zip]

SOMic  
McFarlane\_2013, MA Harvard Forest, H1

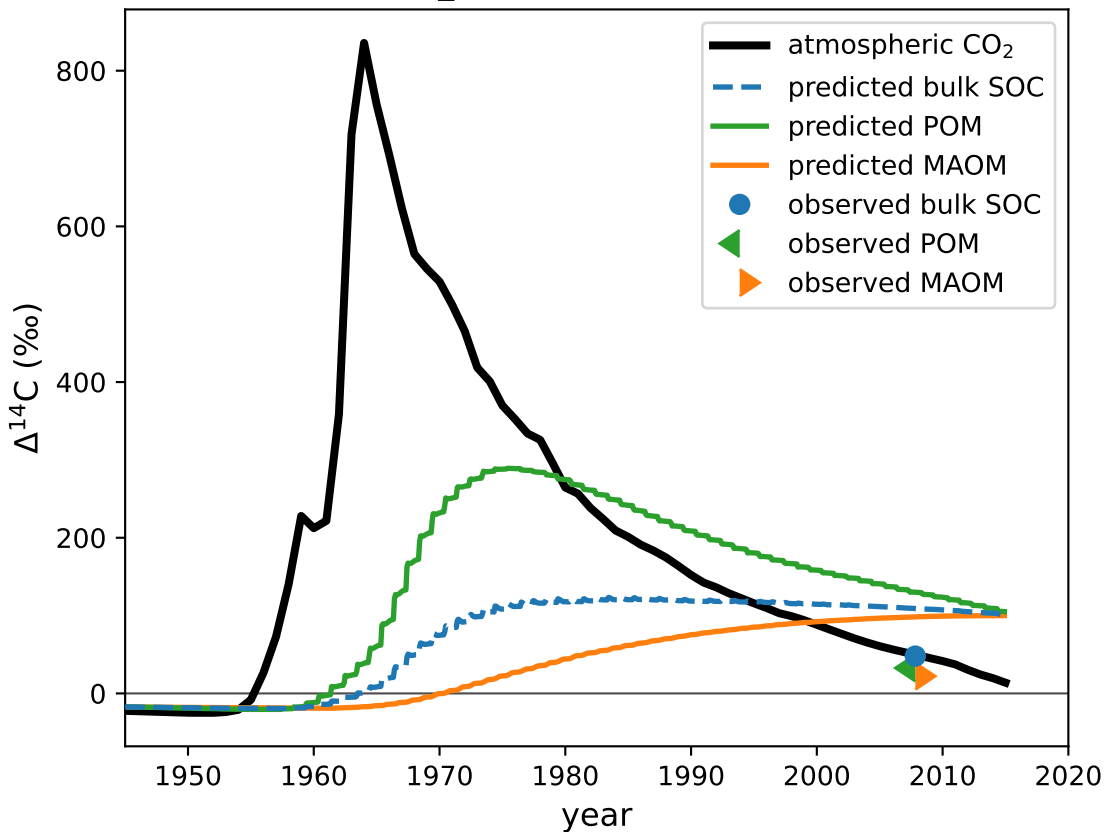

Supplement: Supplementary file 86 [file gmd-2023-242-supplement.zip]

MIMICS  
Schrumpf\_2013, Norunda, Norunda.1

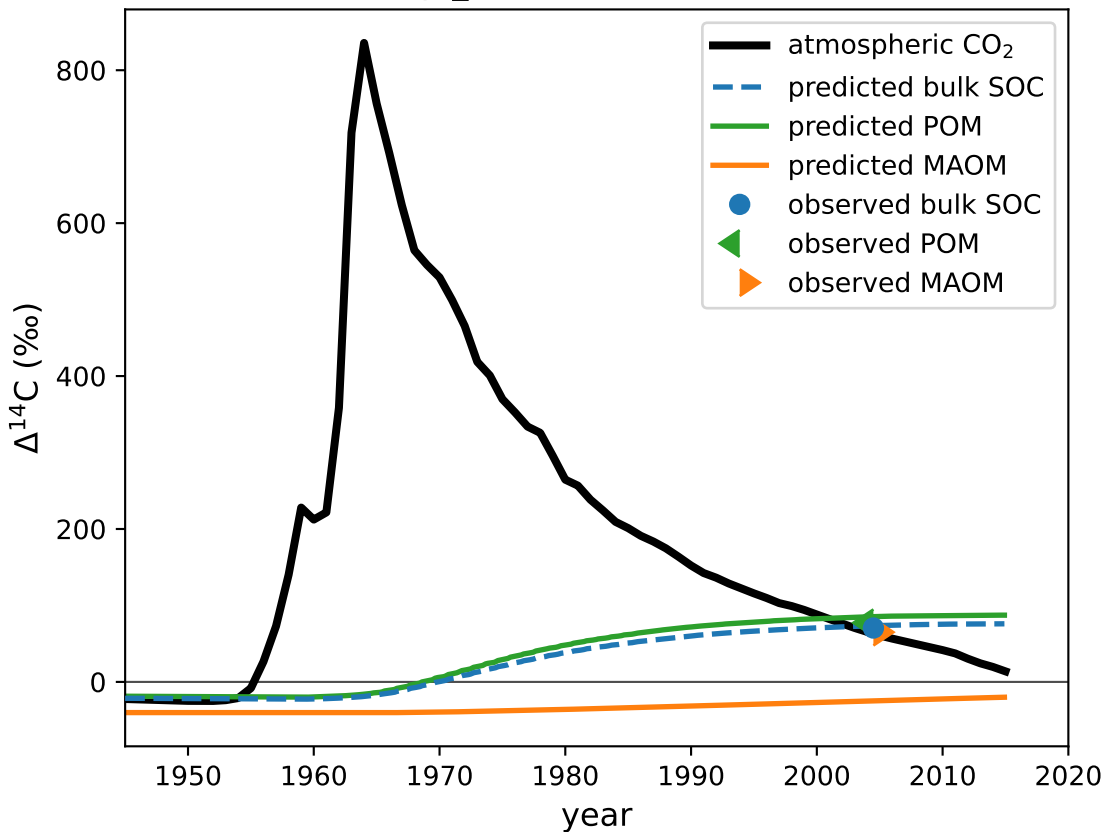

Supplement: Supplementary file 87 [file gmd-2023-242-supplement.zip]

MEND  
Rasmussen\_2018, BSpp, BSpp

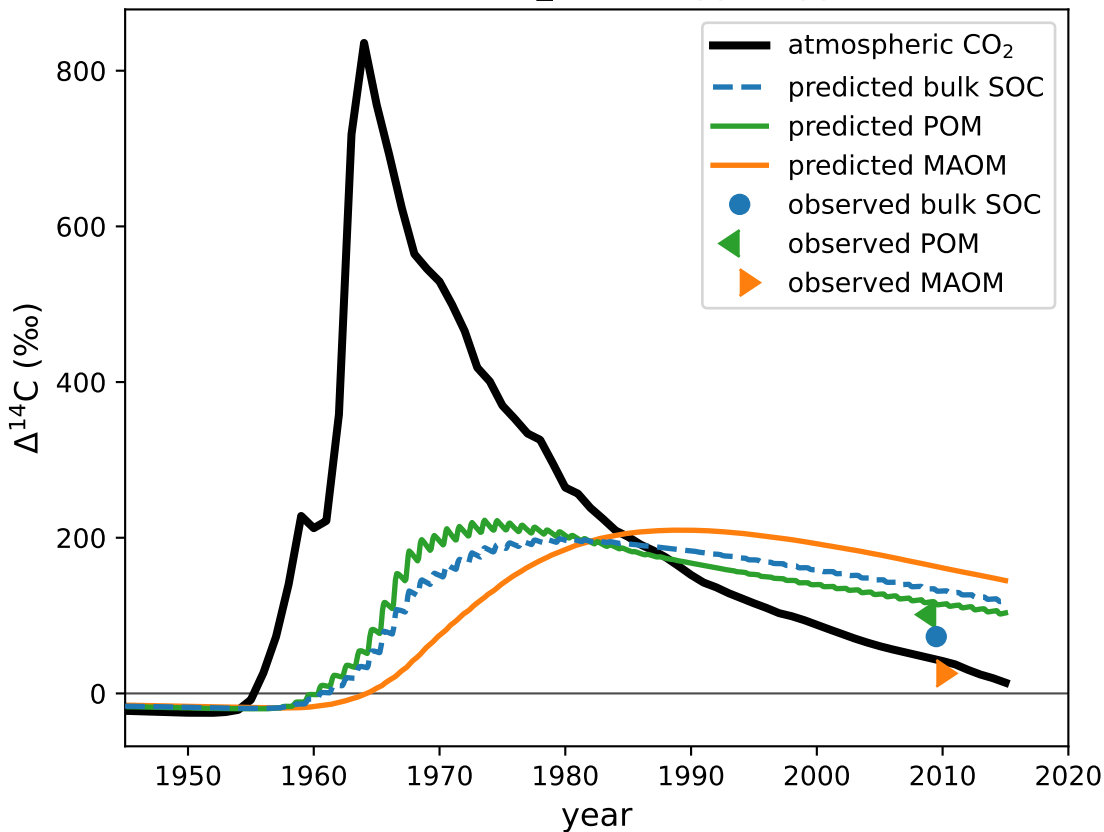

Supplement: Supplementary file 88 [file gmd-2023-242-supplement.zip]

MEND  
McFarlane\_2013, MO Ozark BREA, M4

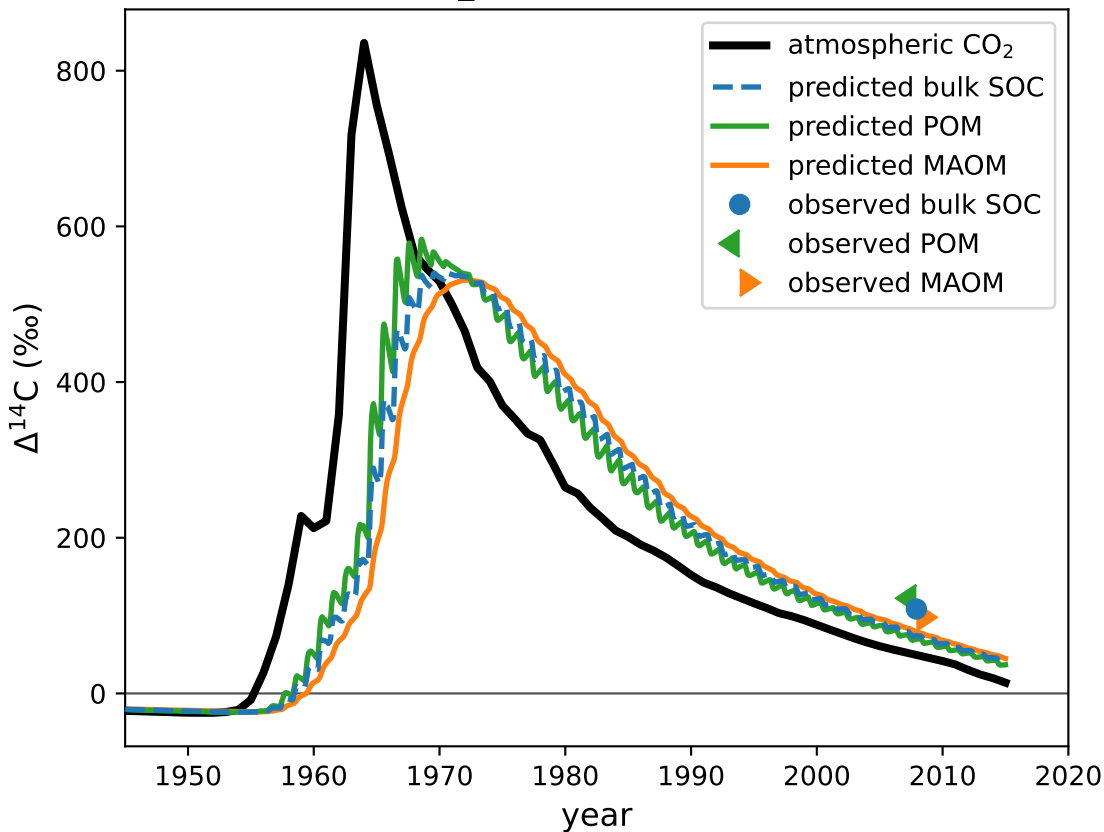

Supplement: Supplementary file 89 [file gmd-2023-242-supplement.zip]

MIMICS  
Berhe\_2012, Tennessee Valley, slope comp

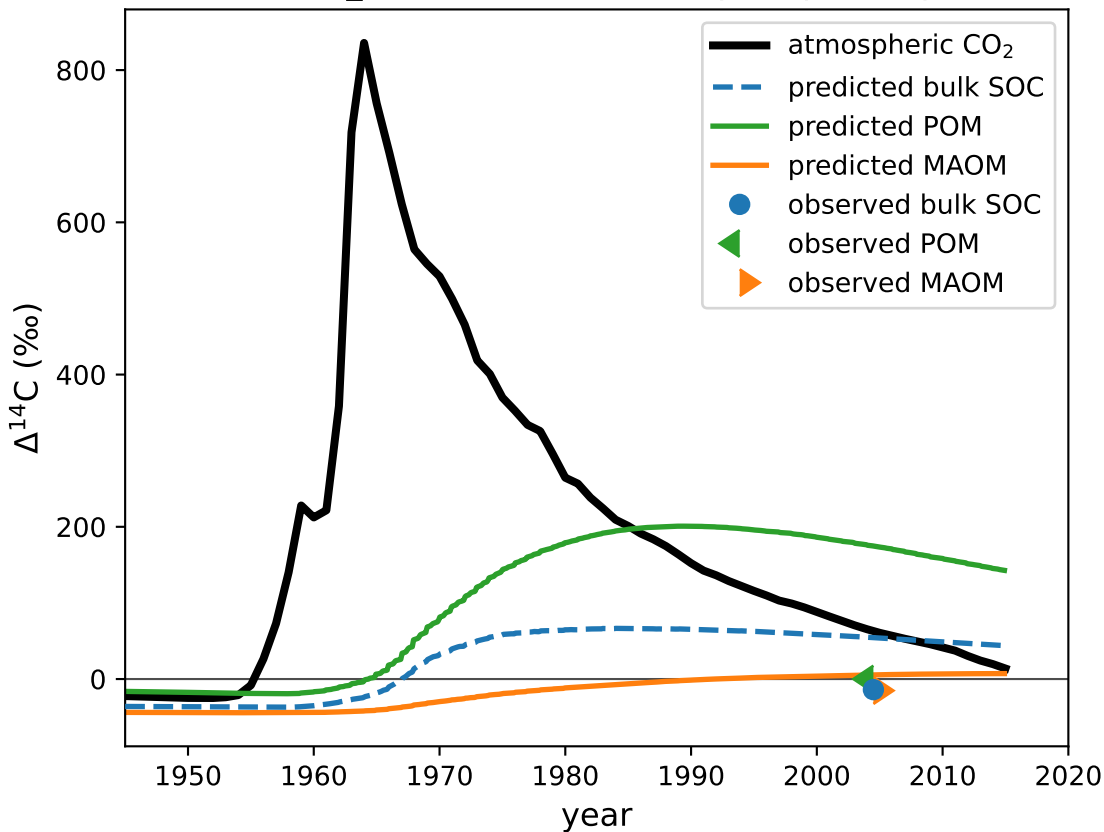

Supplement: Supplementary file 90 [file gmd-2023-242-supplement.zip]

MIMICS  
Baisden\_2002, Riverbank, Riverbank.1949

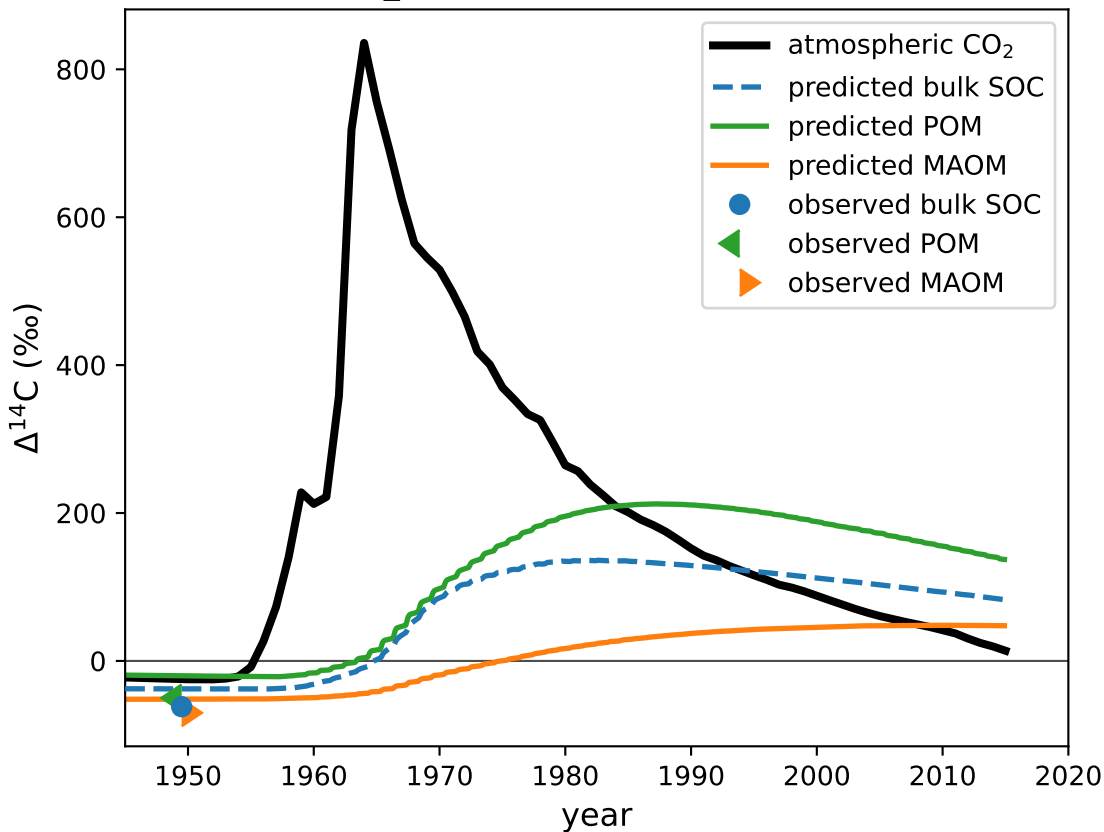

Supplement: Supplementary file 91 [file gmd-2023-242-supplement.zip]

Millennial

Lybrand\_2017, Catalina CZO conifer, mixed conifer\_convergent

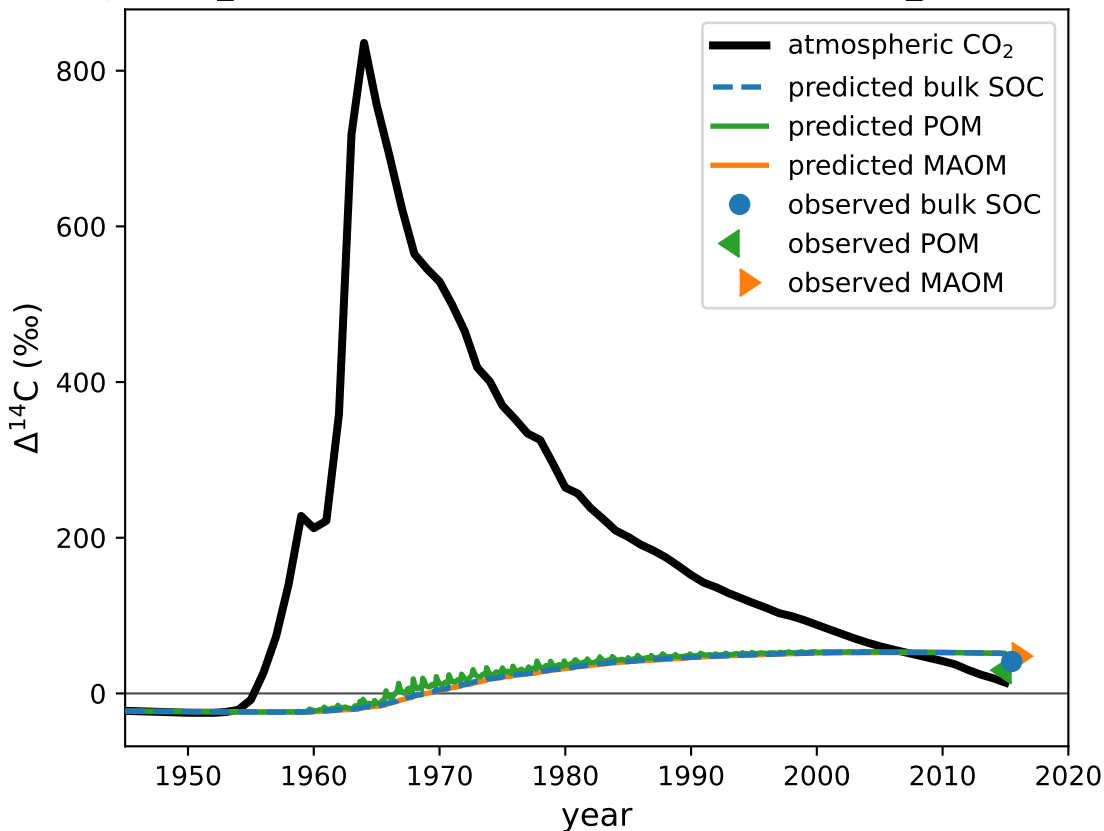

Supplement: Supplementary file 92 [file gmd-2023-242-supplement.zip]

MIMICS  
Schrumpf\_2013, Grignon, Grignon.1

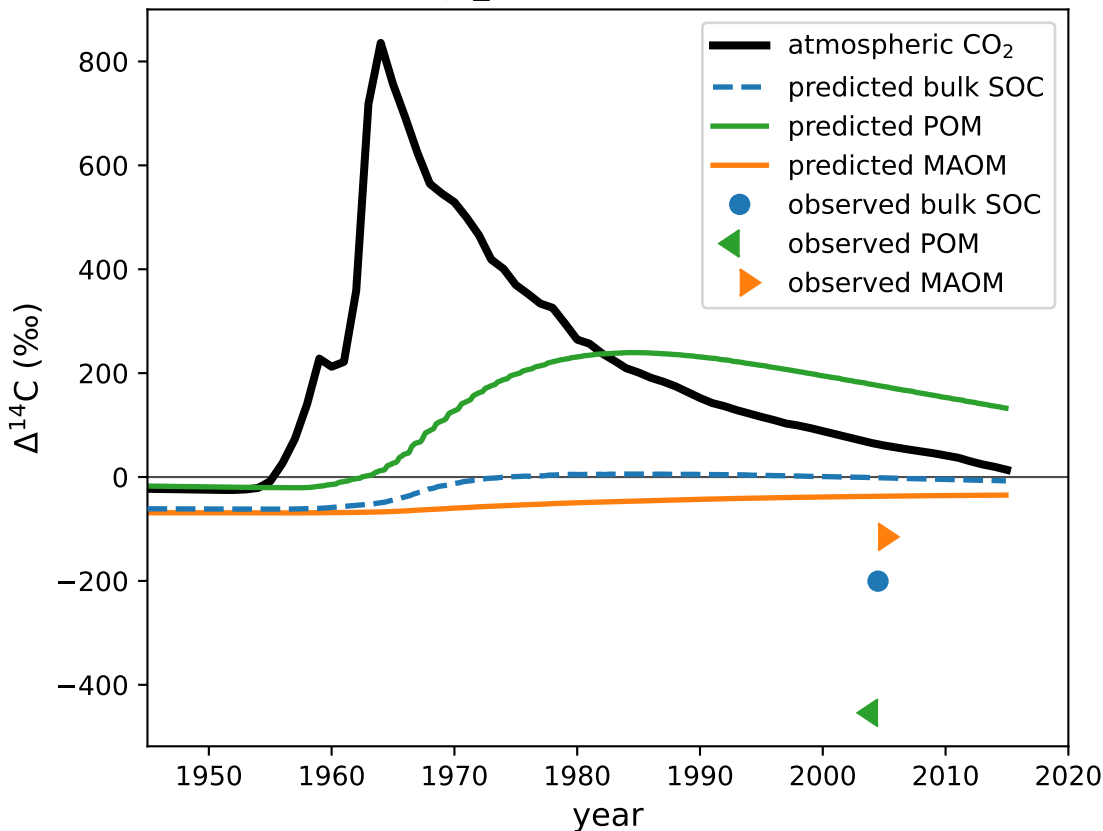

Supplement: Supplementary file 93 [file gmd-2023-242-supplement.zip]

CORPSE  
Schrumpf\_2013, Bugac, Bugac.1

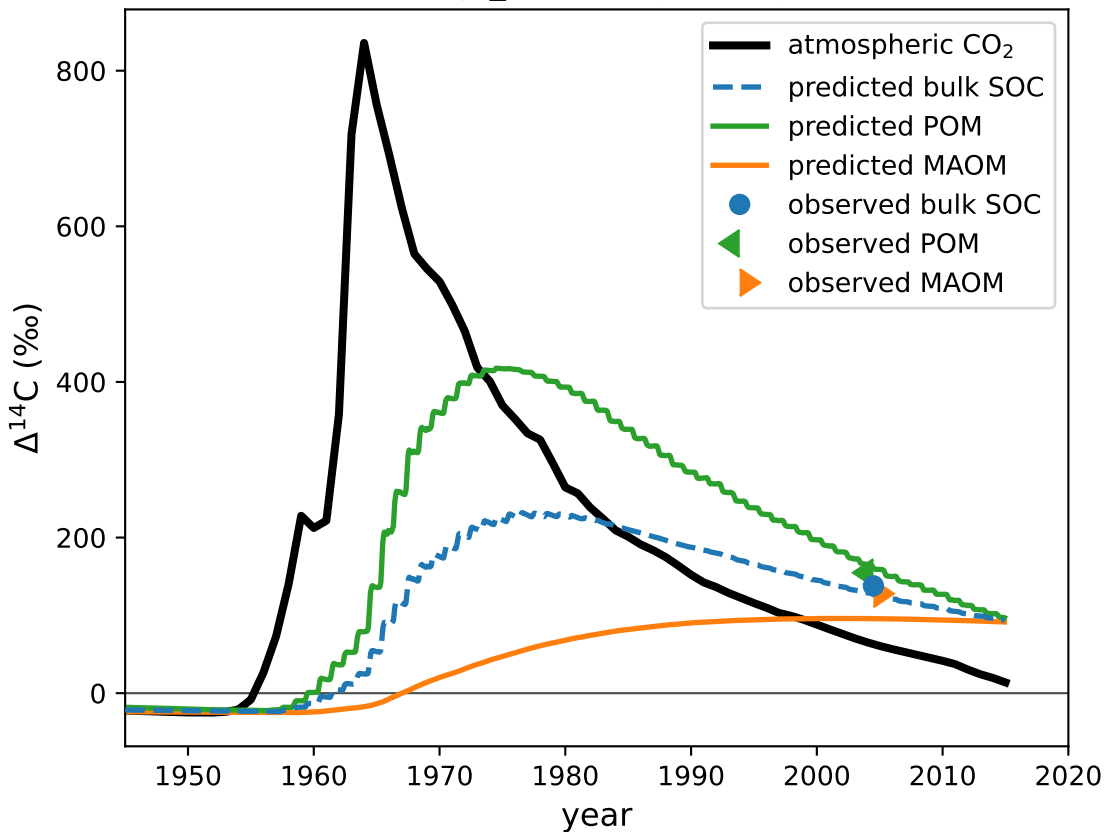

Supplement: Supplementary file 94 [file gmd-2023-242-supplement.zip]

SOMic  
McFarlane\_2013, MO Ozark BREA, M1

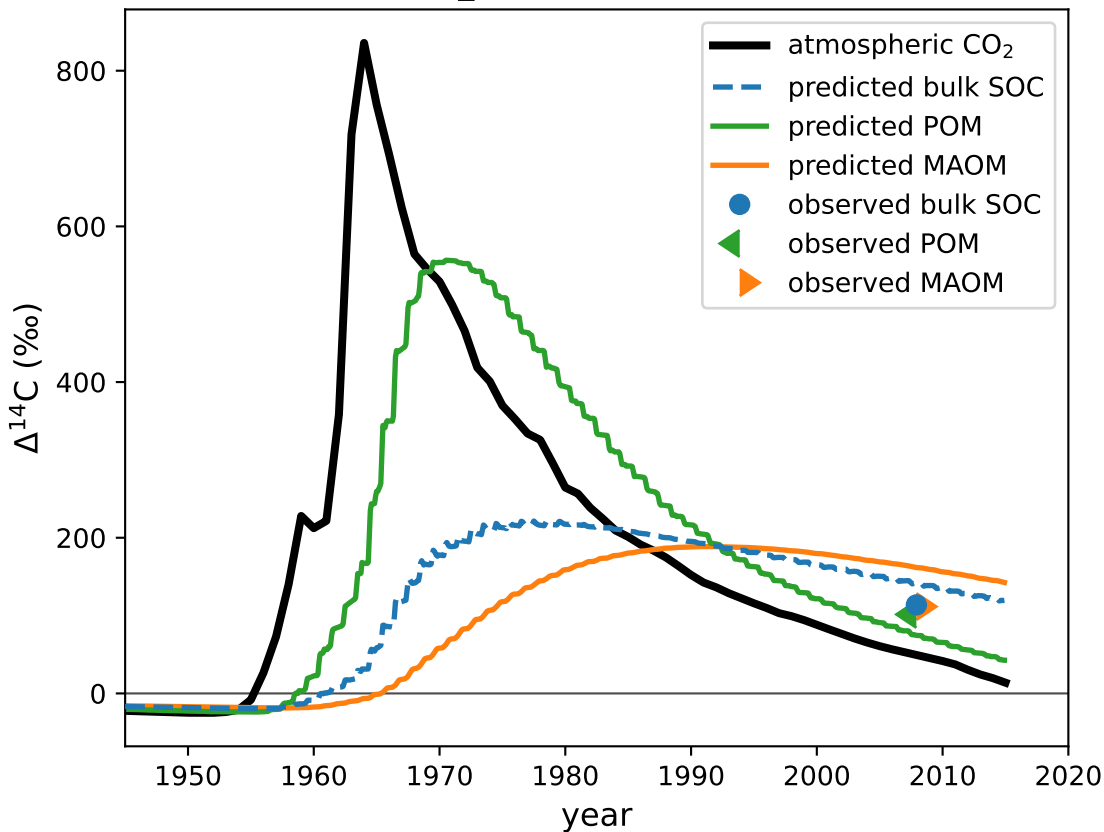

Supplement: Supplementary file 95 [file gmd-2023-242-supplement.zip]

CORPSE  
McFarlane\_2013, NH Bartlett Forest, B5

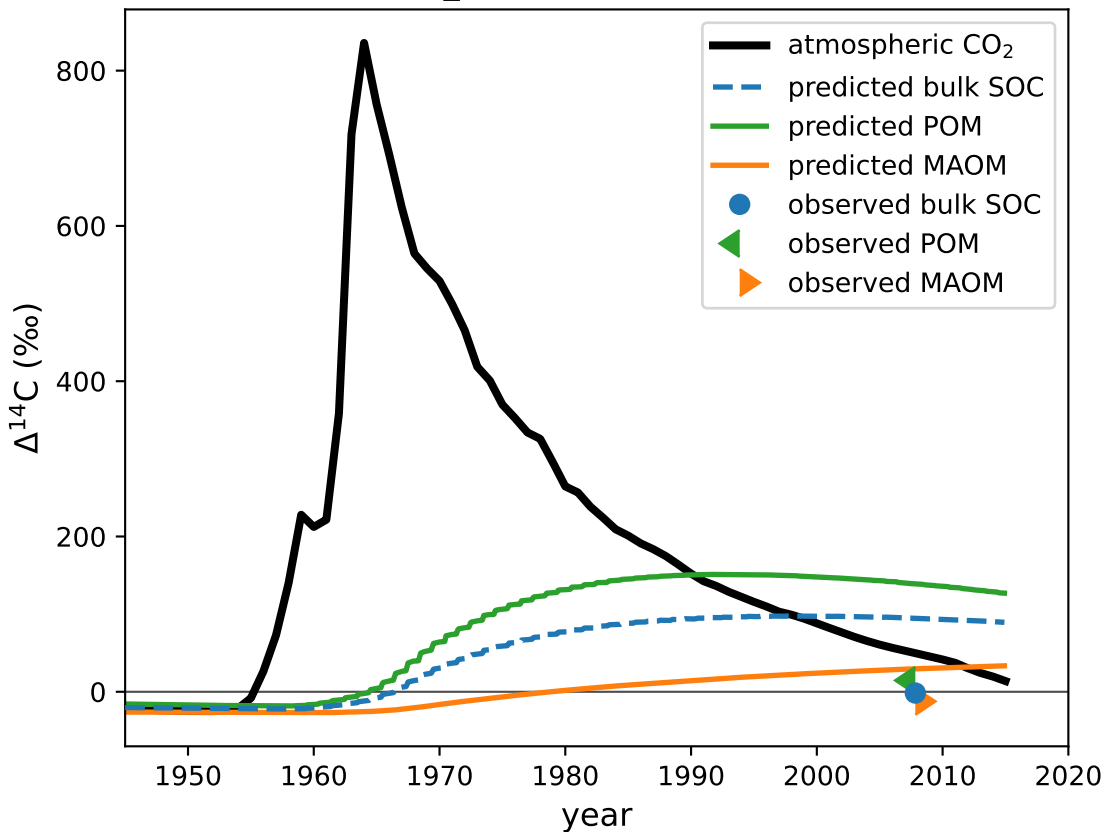

Supplement: Supplementary file 96 [file gmd-2023-242-supplement.zip]

MIMICS  
Meyer\_2012, Stubai, Meadow

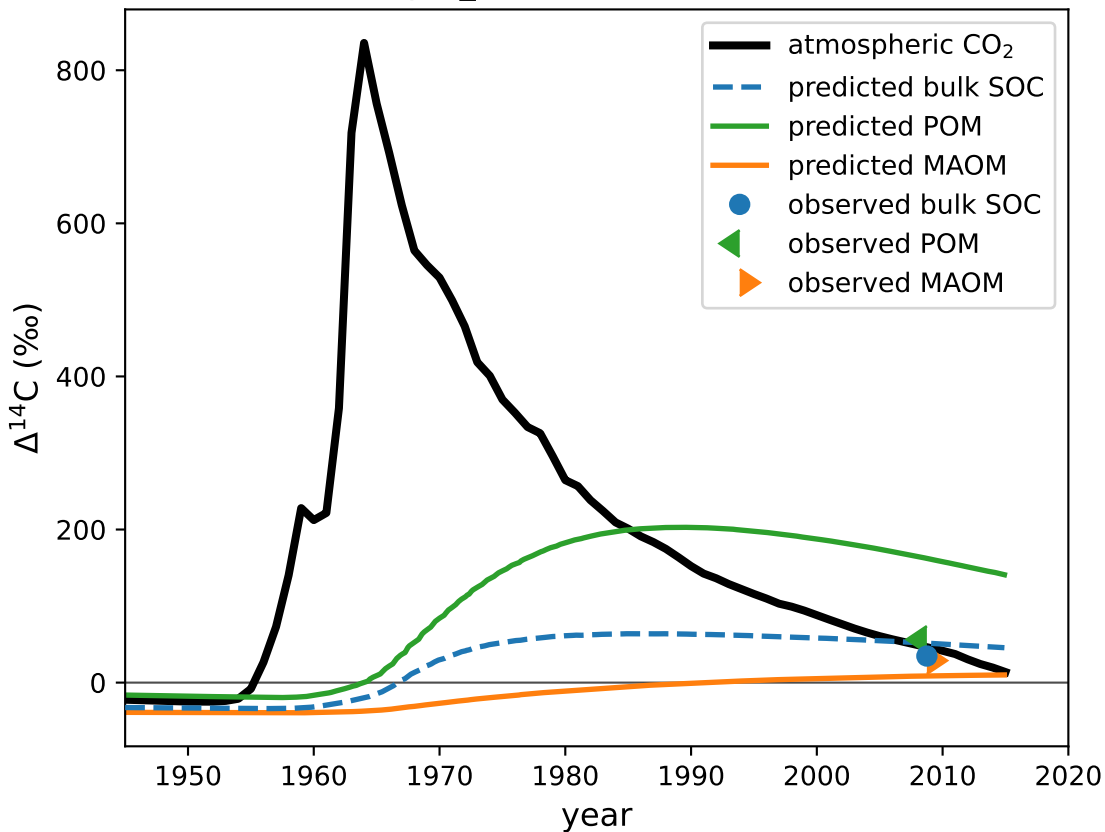

Supplement: Supplementary file 97 [file gmd-2023-242-supplement.zip]

SOMic  
Meyer\_2012, Matsch, Pasture

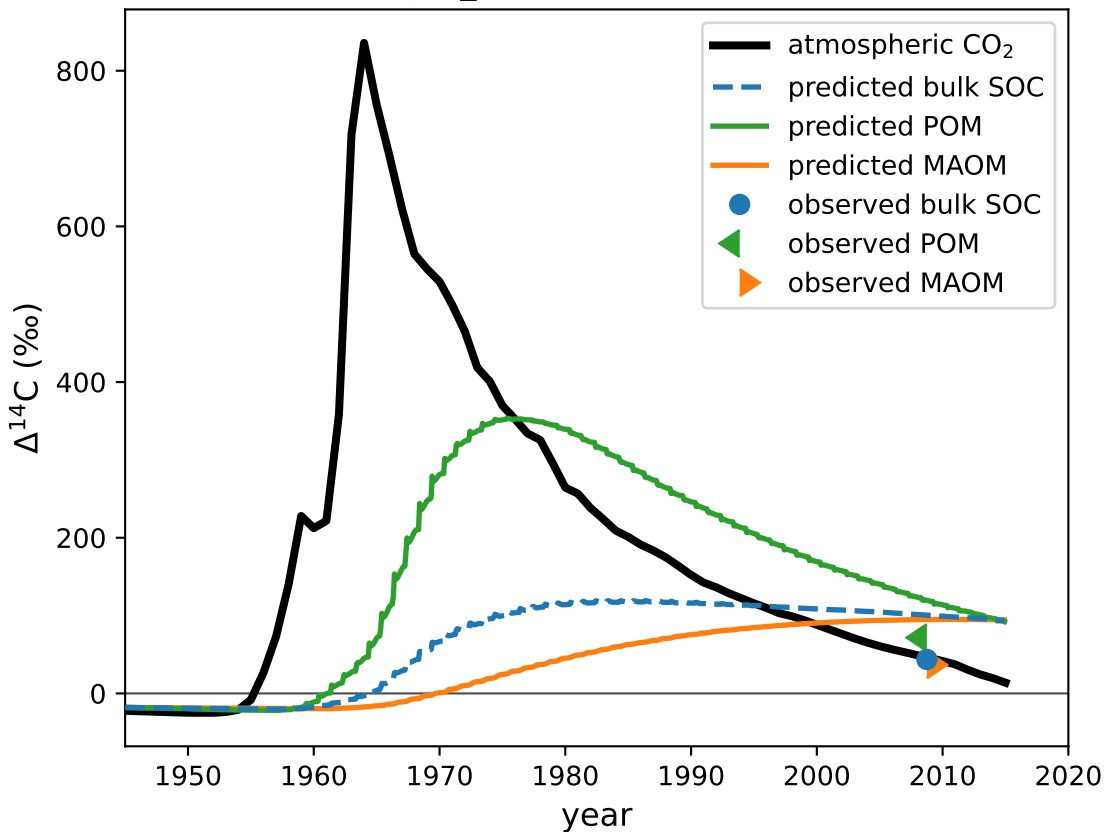

Supplement: Supplementary file 98 [file gmd-2023-242-supplement.zip]

MIMICS  
McFarlane\_2013, MO Ozark BREA, M5

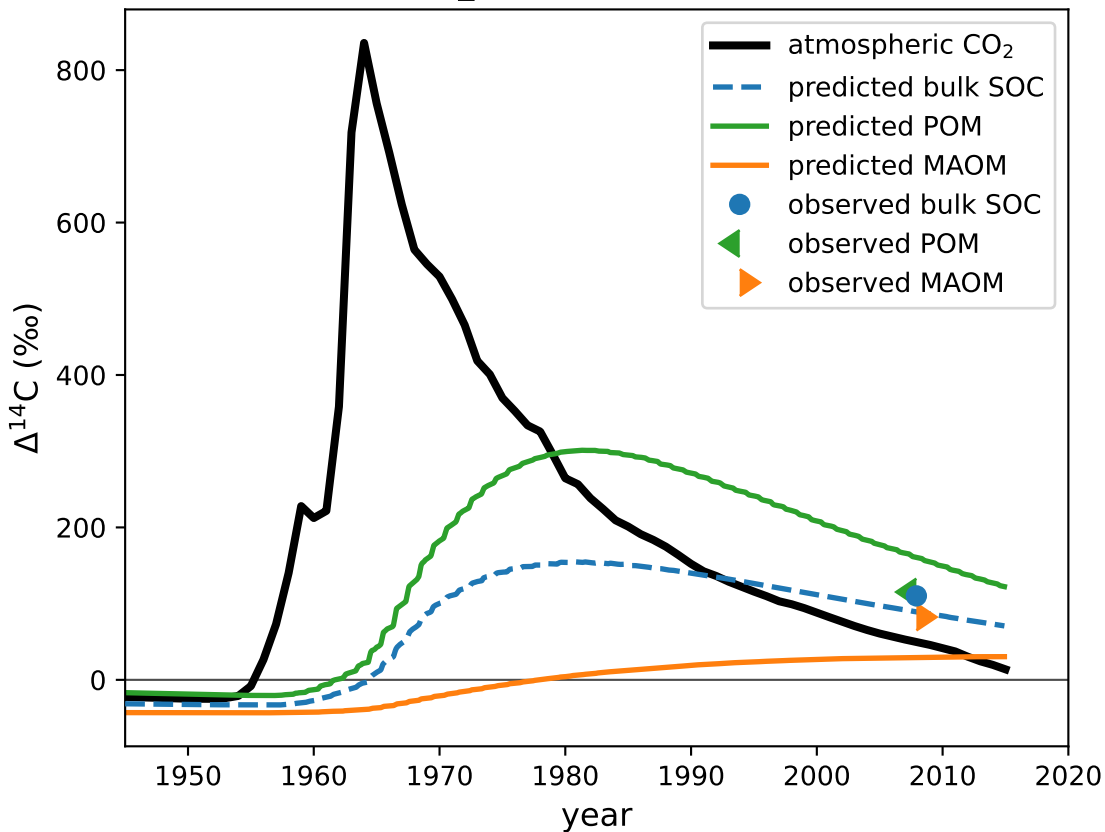

Supplement: Supplementary file 99 [file gmd-2023-242-supplement.zip]

MIMICS  
Schrumpf\_2013, Hesse, Hesse.1

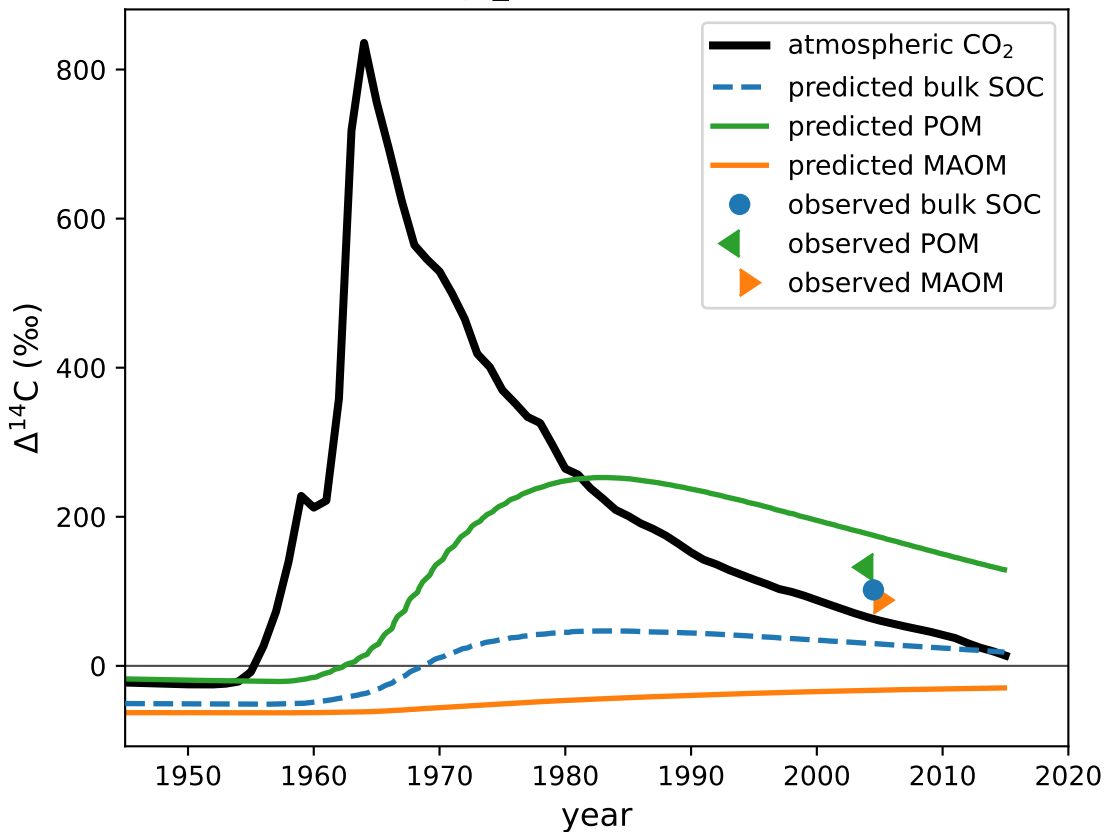

Supplement: Supplementary file 101 [file gmd-2023-242-supplement.zip]
