# Supplementary figures and images for: Radiocarbon analysis reveals underestimation of soil organic carbon persistence in new-generation soil models (part 2 of 4)
Source: Copernicus journal article supplement (doi:10.5194/gmd-2023-242), 2024-01-19

MIMICS  
Rasmussen\_2018, BSrf, BSrf

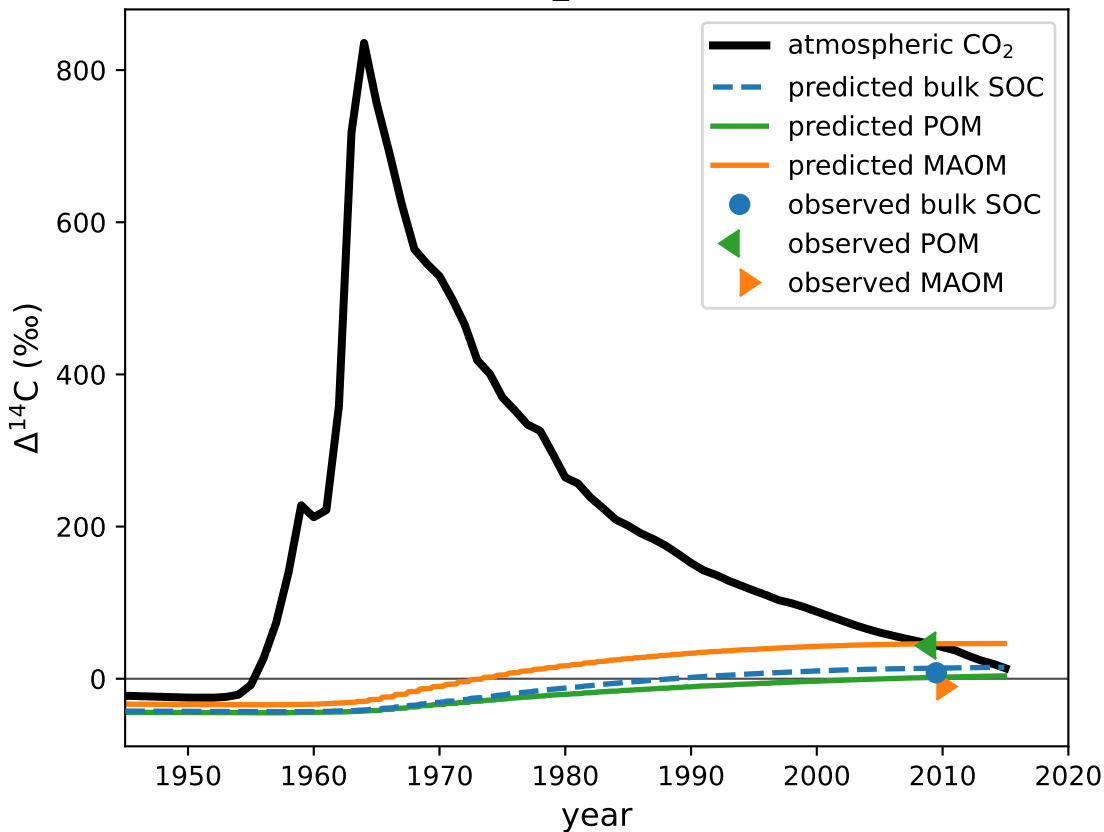

Supplement: Supplementary file 102 [file gmd-2023-242-supplement.zip]

SOMic  
Lybrand\_2017, Catalina CZO conifer, mixed conifer\_divergent

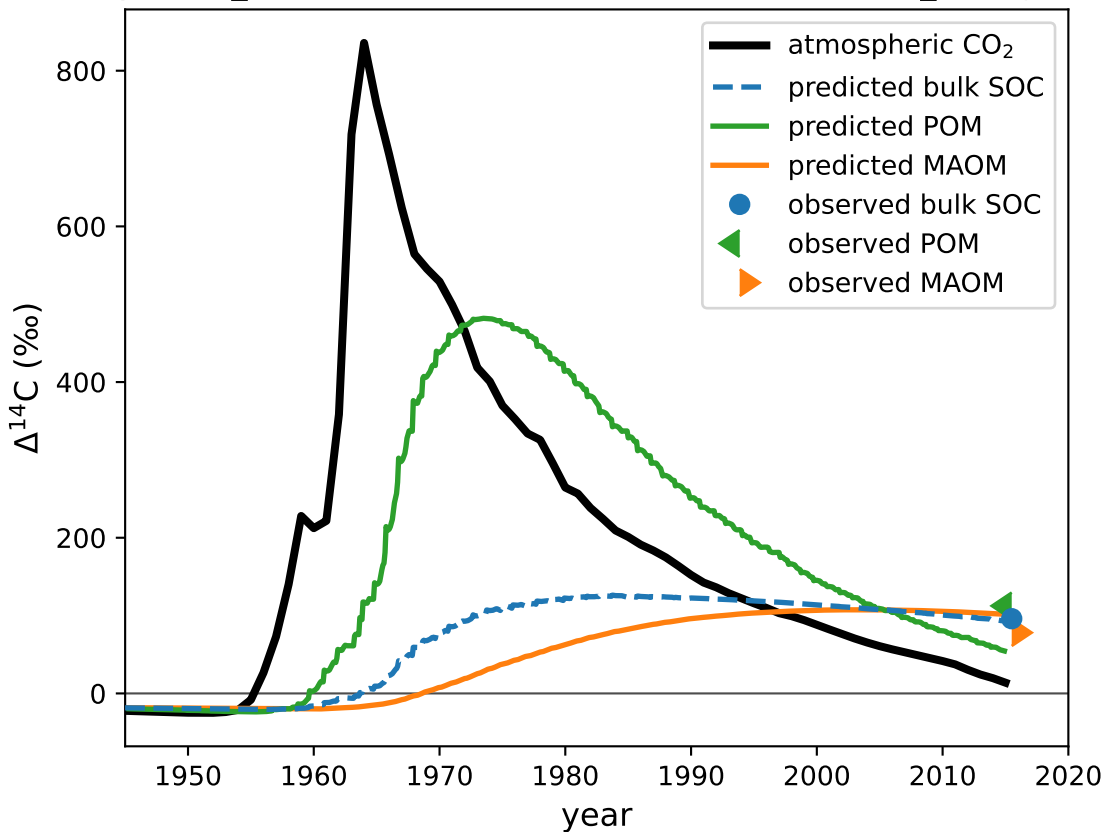

Supplement: Supplementary file 103 [file gmd-2023-242-supplement.zip]

Millennial  
Heckman\_2010, Flagstaff Basalt, FGBA\_composite

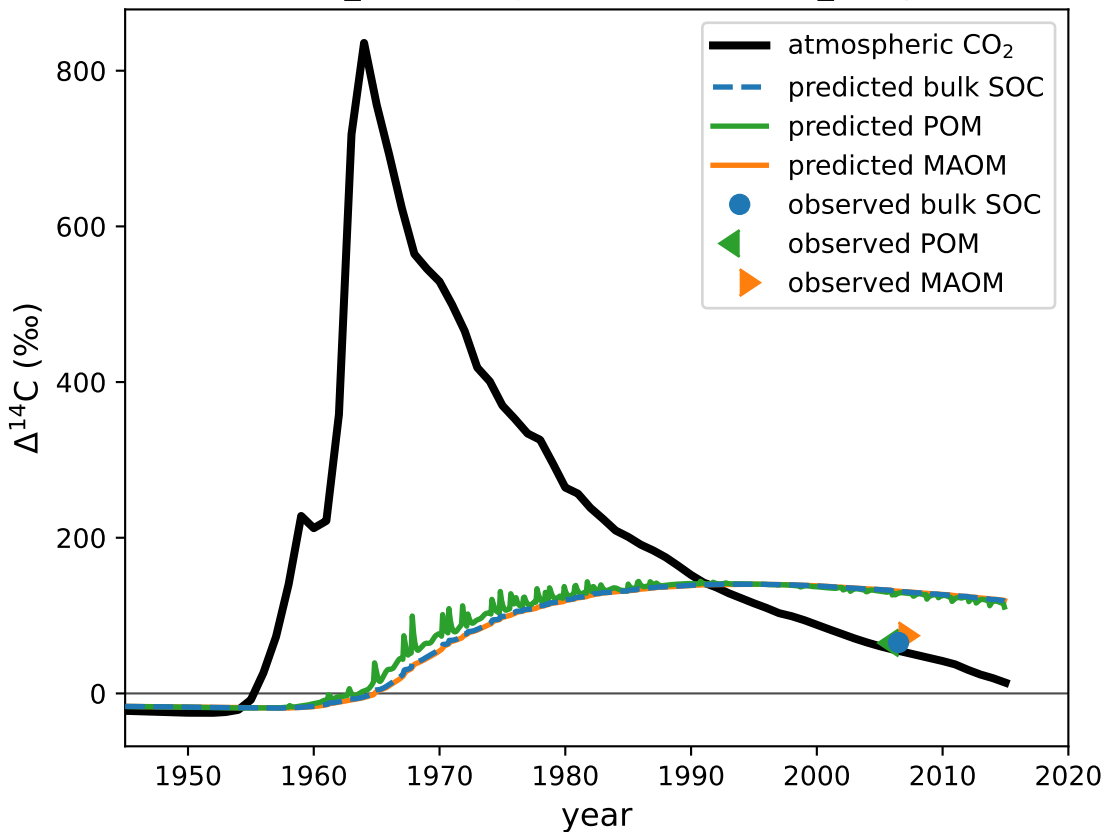

Supplement: Supplementary file 104 [file gmd-2023-242-supplement.zip]

CORPSE  
Schrumpf\_2013, Hainich, Hainich.1

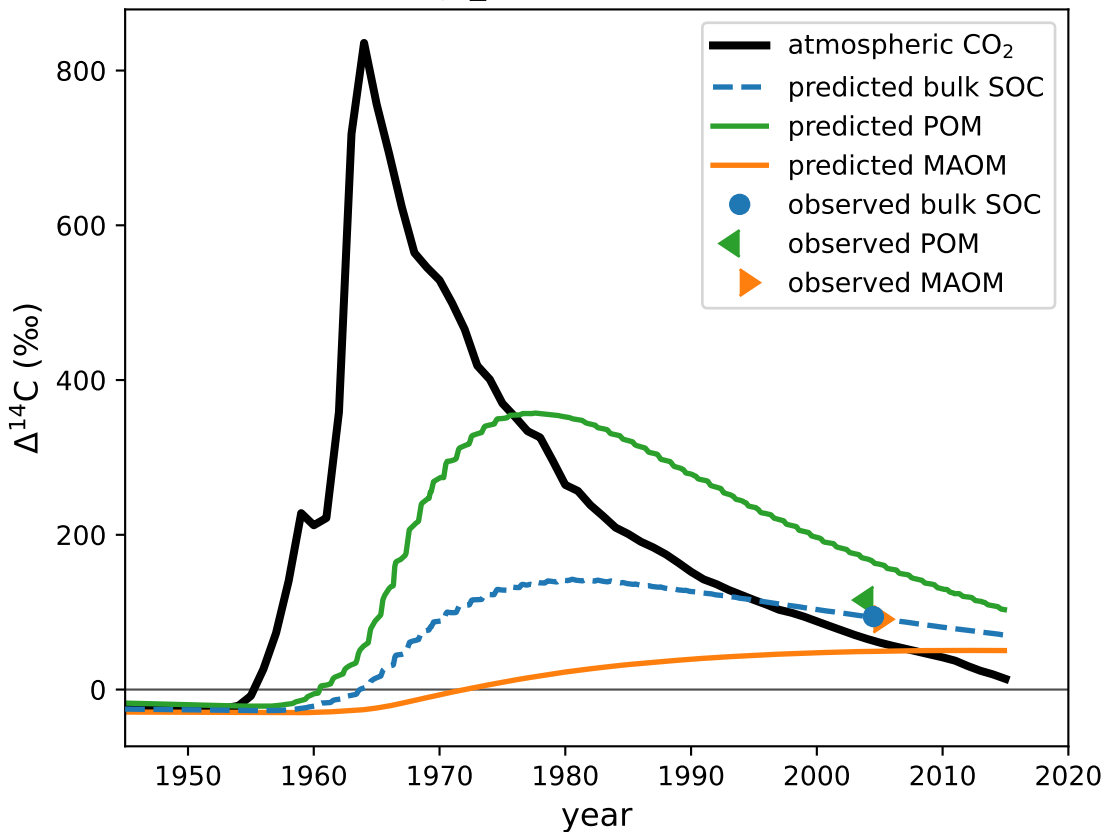

Supplement: Supplementary file 105 [file gmd-2023-242-supplement.zip]

MIMICS  
McFarlane\_2013, NH Bartlett Forest, B3

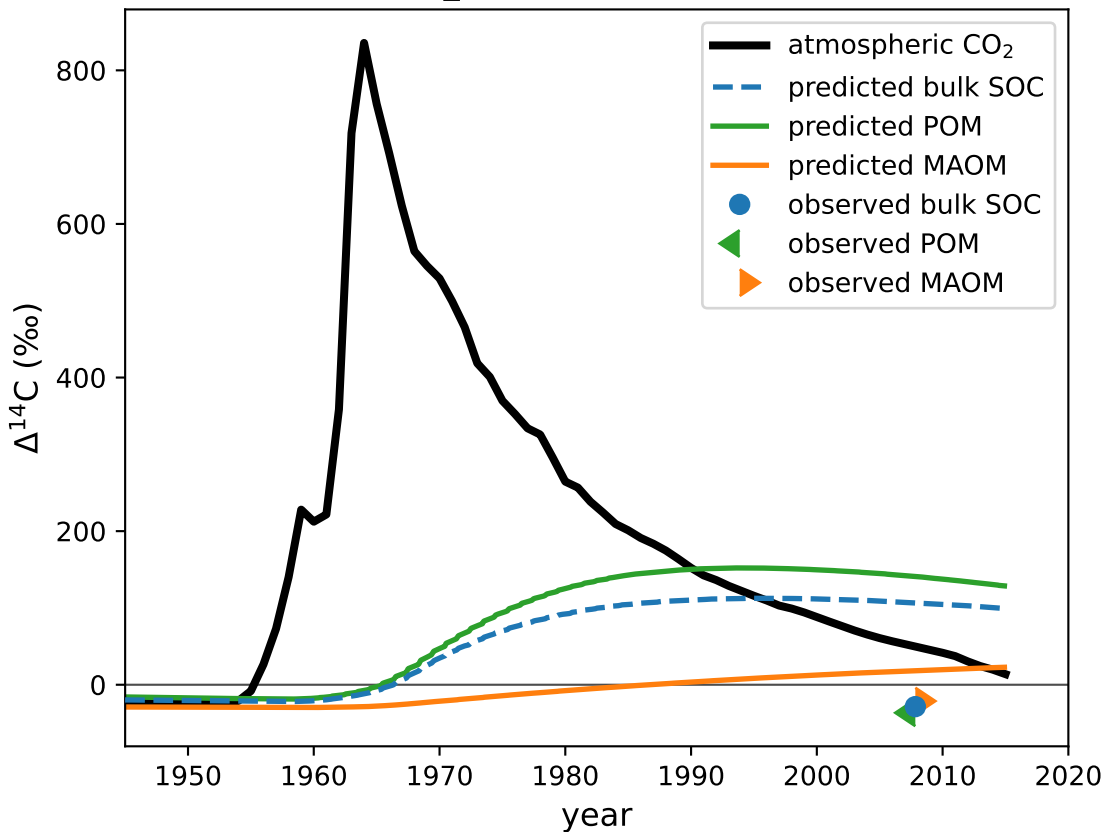

Supplement: Supplementary file 106 [file gmd-2023-242-supplement.zip]

Millennial  
Meyer\_2012, Matsch, Meadow

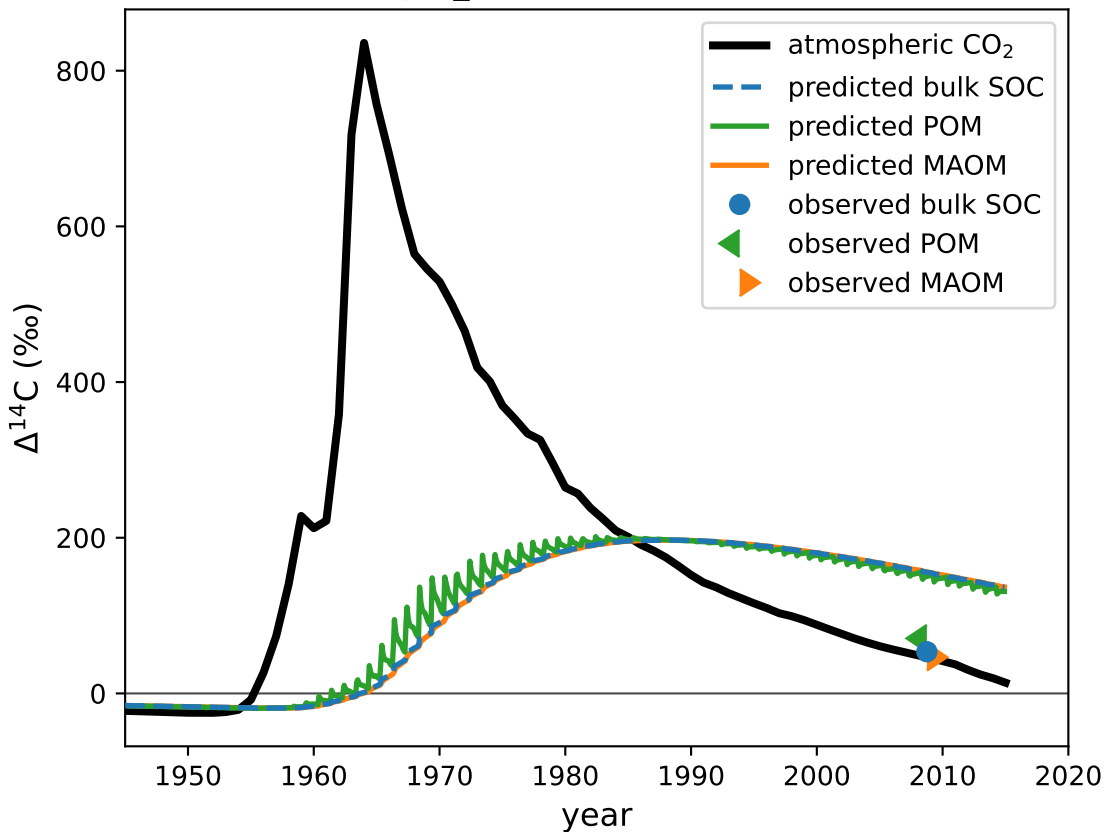

Supplement: Supplementary file 107 [file gmd-2023-242-supplement.zip]

Millennial  
Schrumpf\_2013, Carlow, Carlow.1

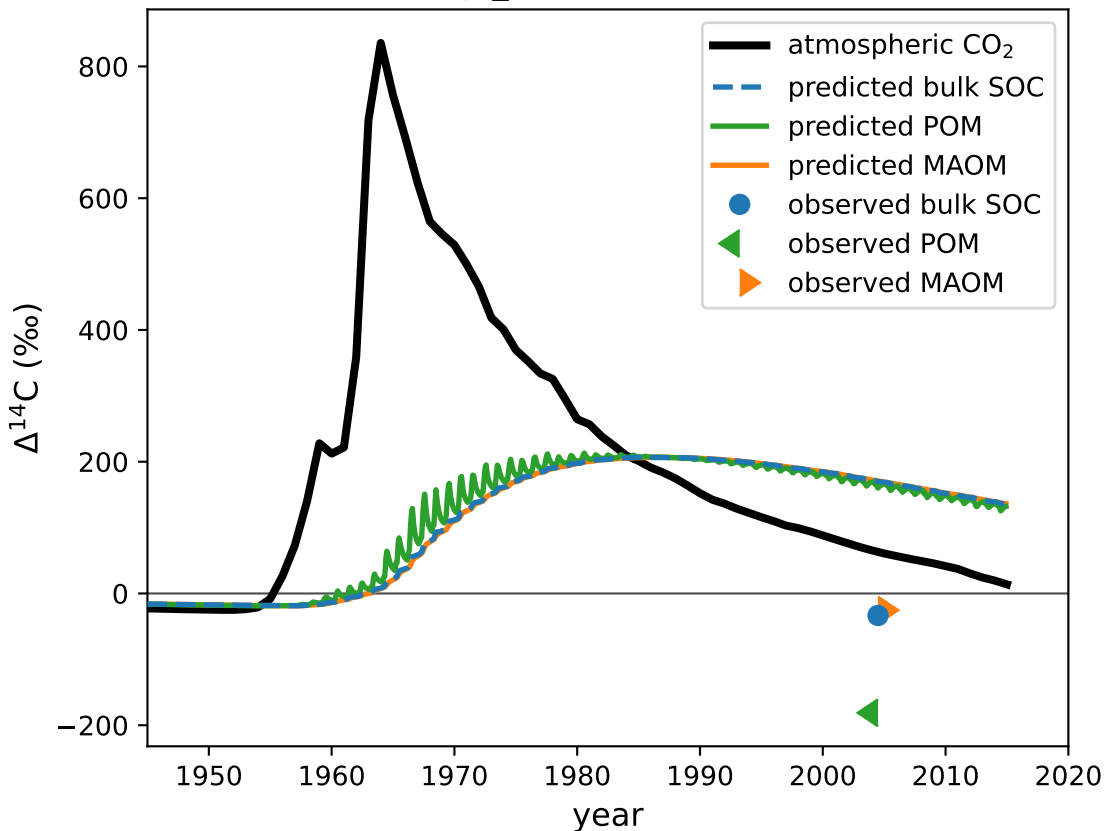

Supplement: Supplementary file 108 [file gmd-2023-242-supplement.zip]

CORPSE  
McFarlane\_2013, MI-Coarse UMBS, D4

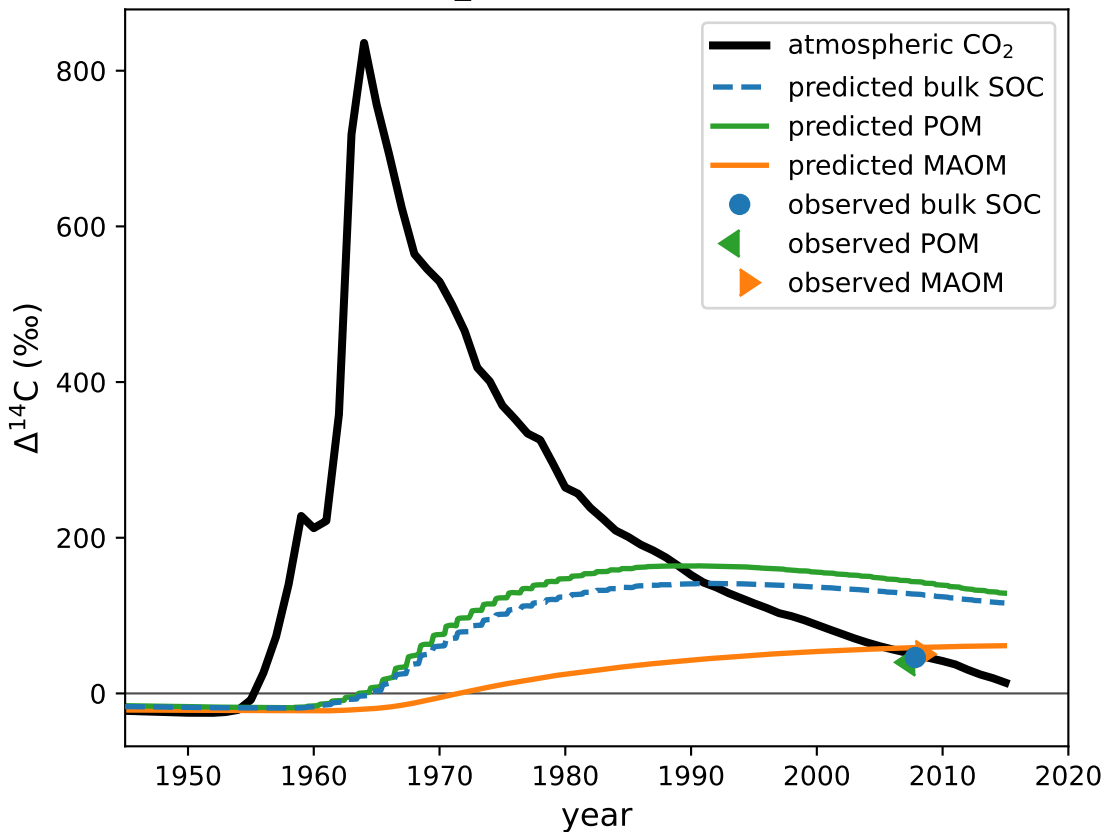

Supplement: Supplementary file 109 [file gmd-2023-242-supplement.zip]

MIMICS  
Schrumpf\_2013, Bugac, Bugac.1

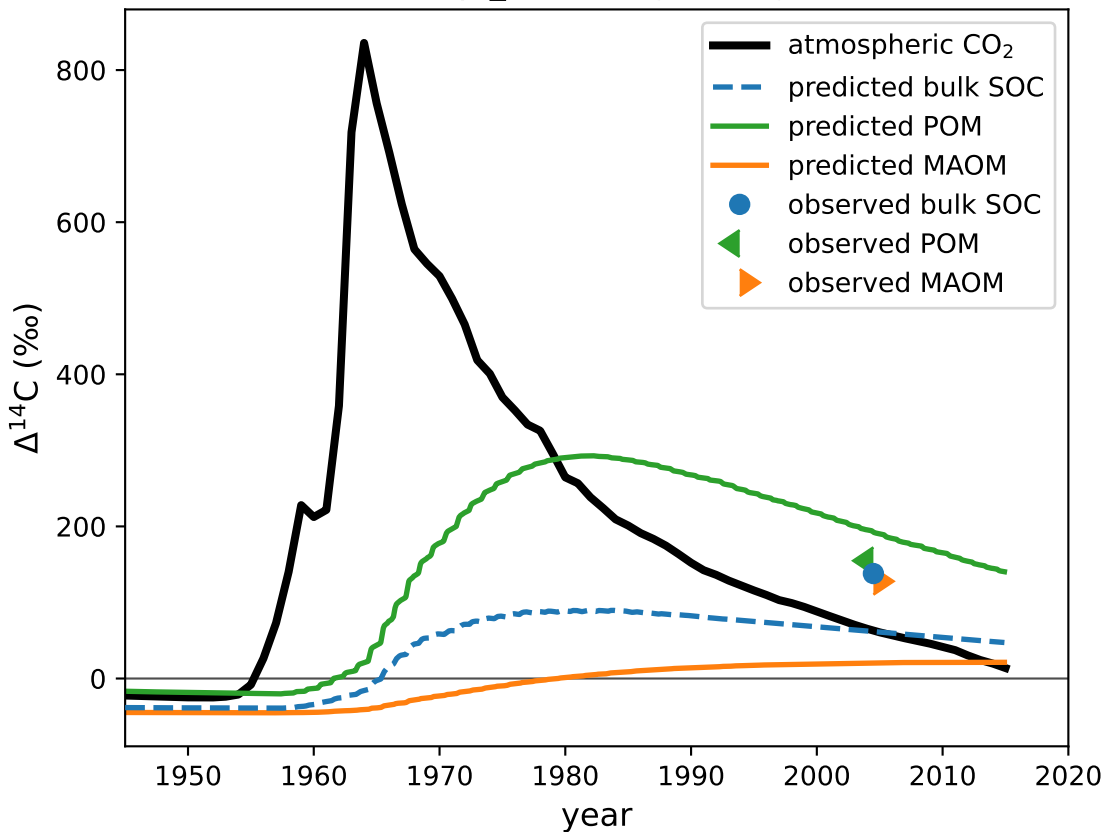

Supplement: Supplementary file 110 [file gmd-2023-242-supplement.zip]

CORPSE  
McFarlane\_2013, MI-Coarse UMBS, C7

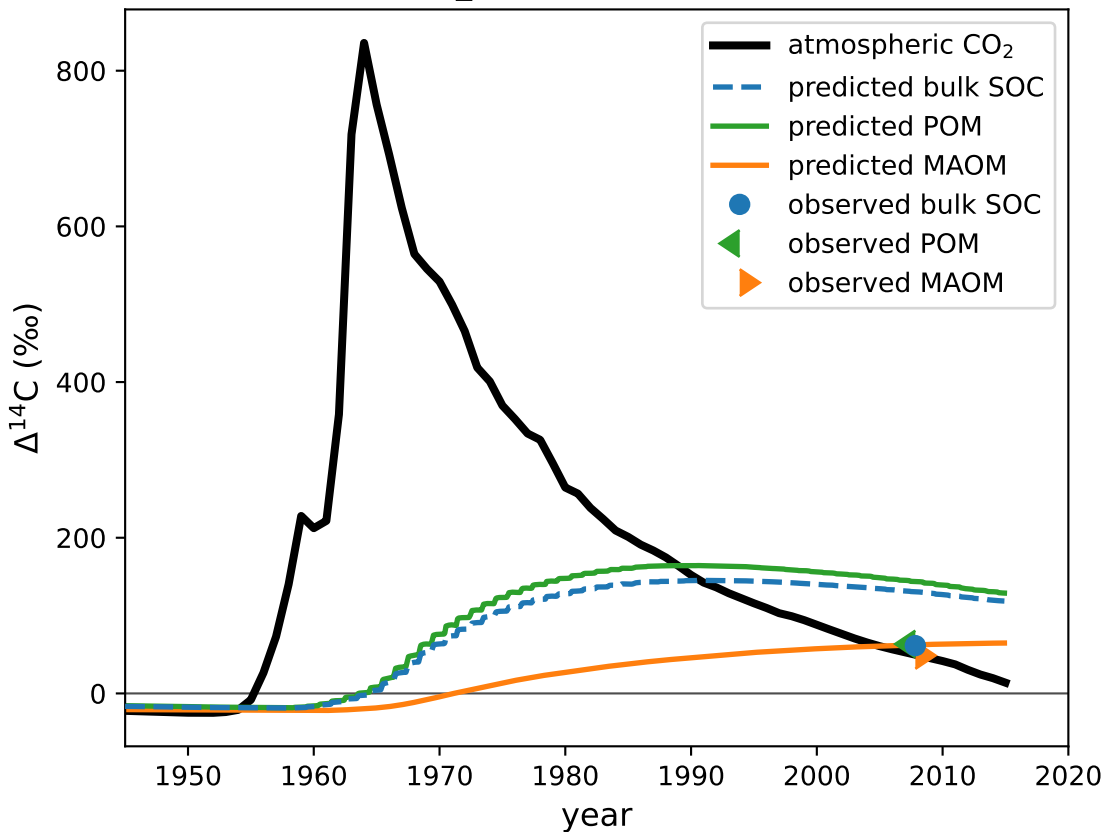

Supplement: Supplementary file 111 [file gmd-2023-242-supplement.zip]

Millennial  
Heckman\_2010, Mt. Lemmon Granite, MLGR\_composite

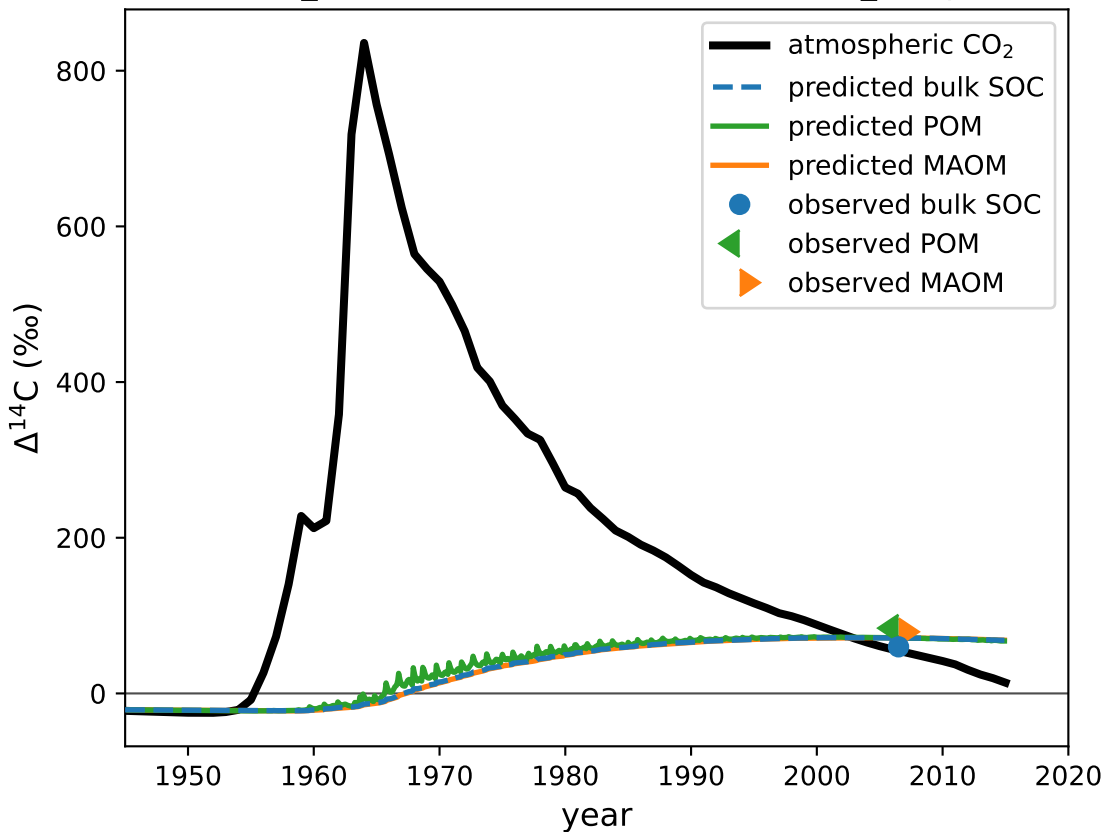

Supplement: Supplementary file 112 [file gmd-2023-242-supplement.zip]

MEND  
Schrumpf\_2013, Hainich, Hainich.1

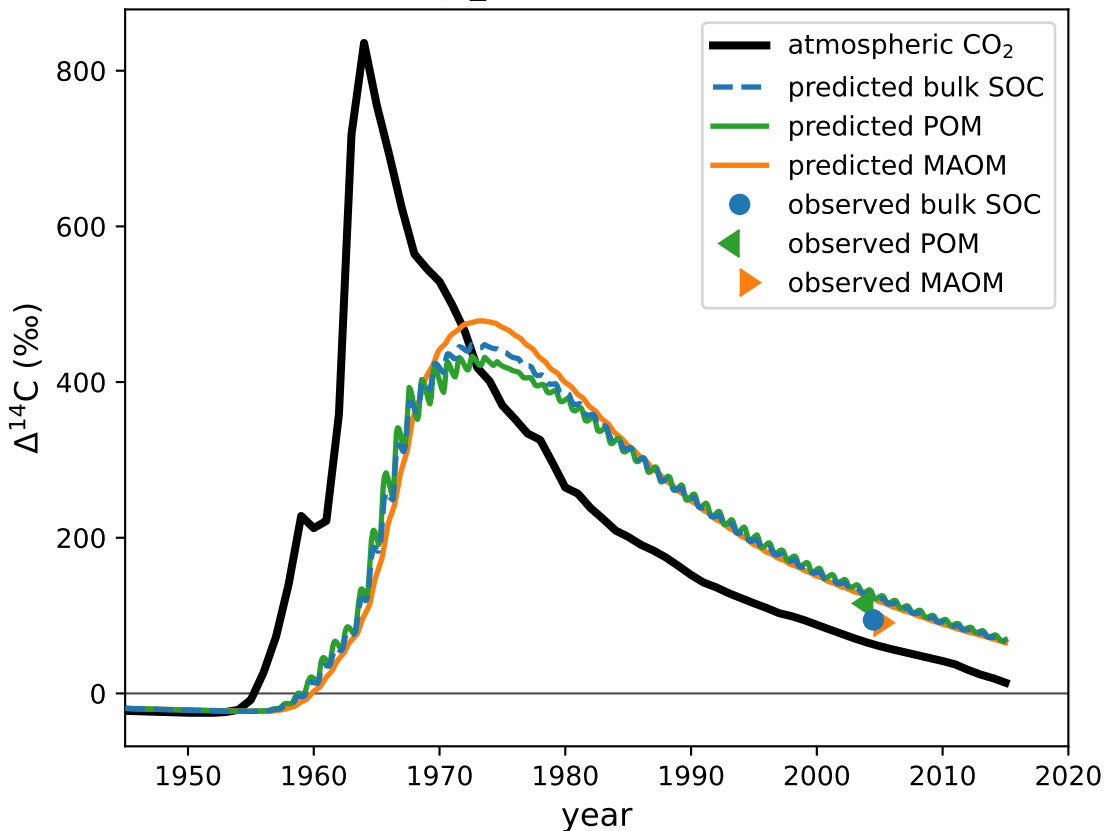

Supplement: Supplementary file 113 [file gmd-2023-242-supplement.zip]

SOMic  
Marin-Spiotta\_2008, Sierra de Cayey, 20yr secondary forest

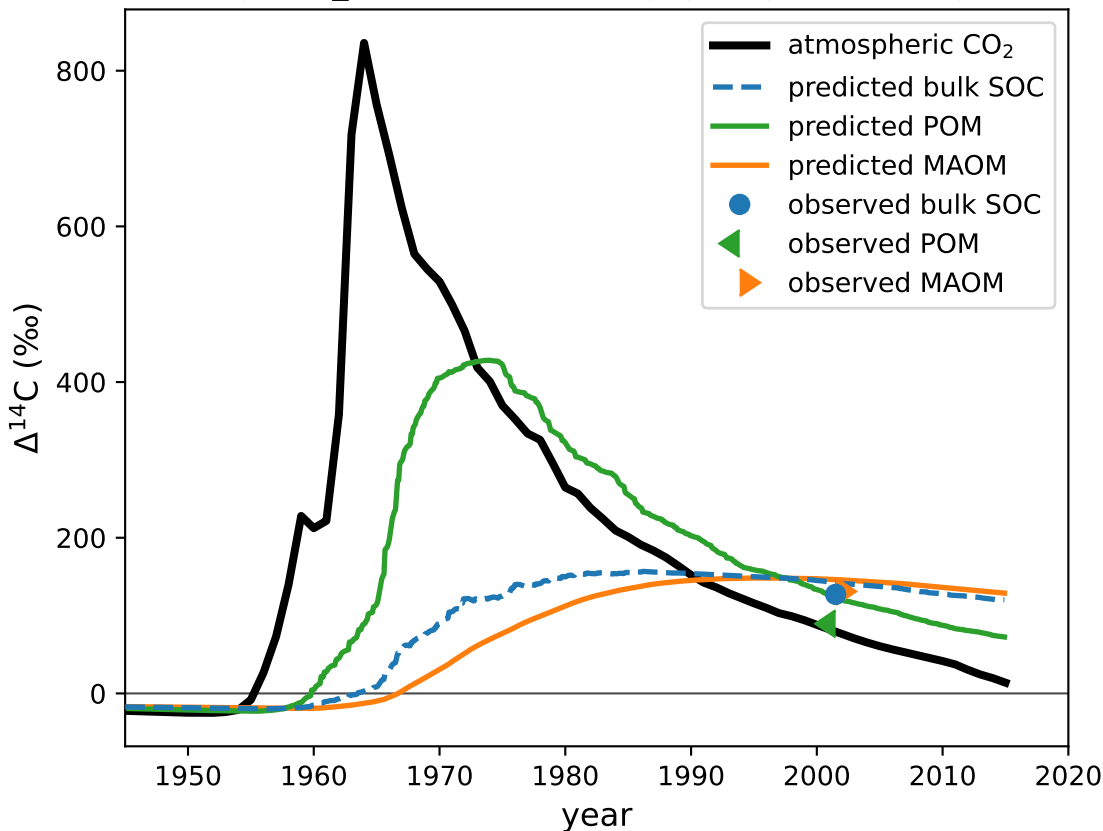

Supplement: Supplementary file 114 [file gmd-2023-242-supplement.zip]

# MIMICS

Lybrand\_2017, Catalina CZO conifer, mixed conifer\_convergent

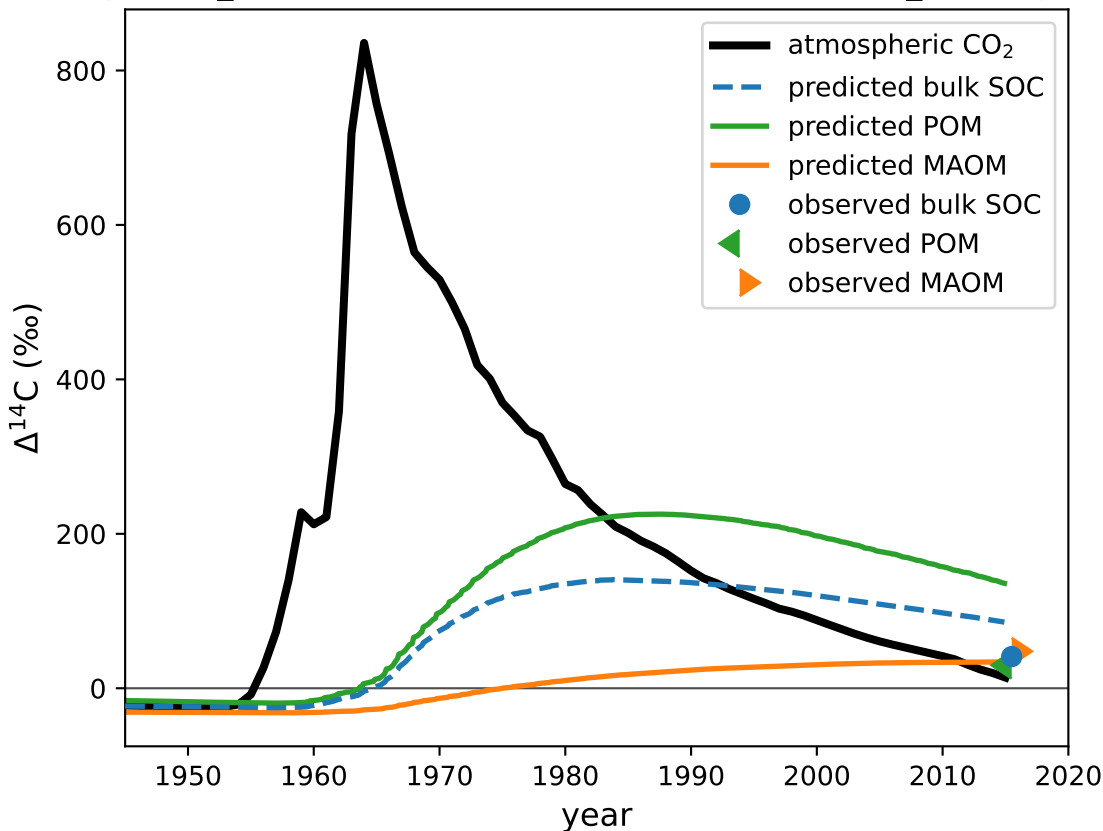

Supplement: Supplementary file 115 [file gmd-2023-242-supplement.zip]

MIMICS  
Rasmussen\_2018, BSpp, BSpp

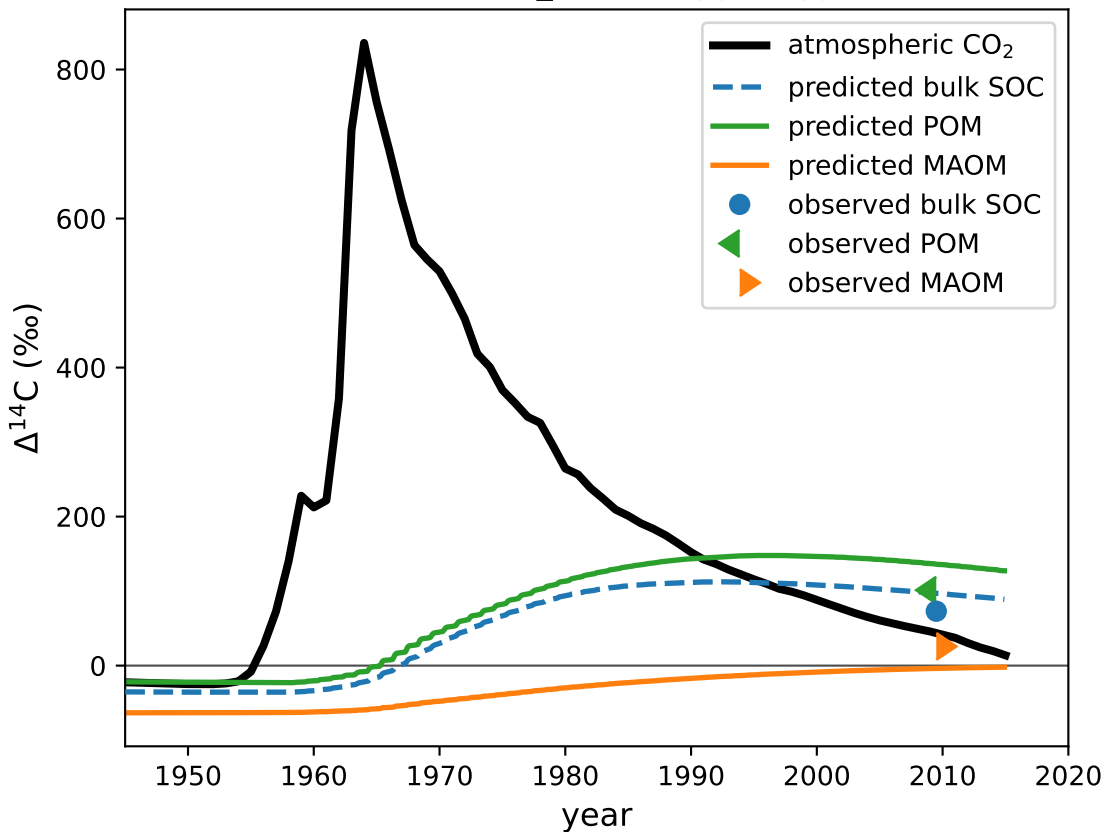

Supplement: Supplementary file 116 [file gmd-2023-242-supplement.zip]

SOMic  
Schrumpf\_2013, Norunda, Norunda.1

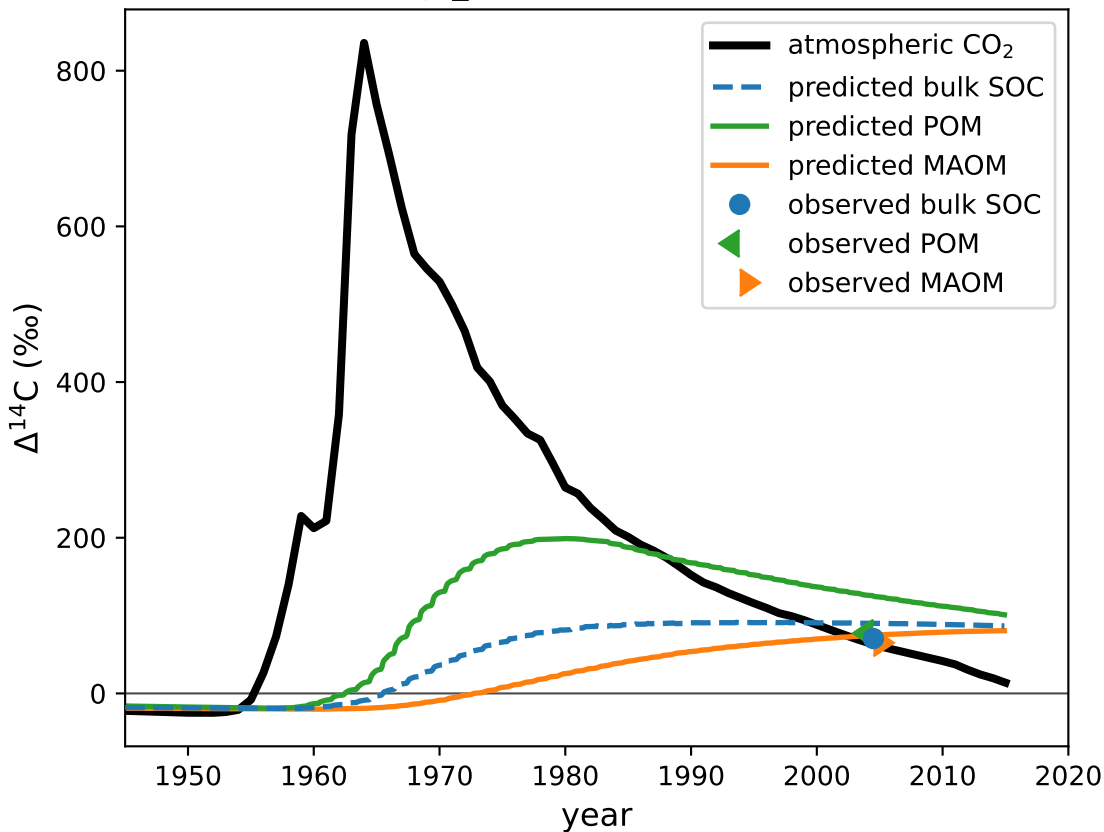

Supplement: Supplementary file 117 [file gmd-2023-242-supplement.zip]

MEND  
Rasmussen\_2018, BSwf, BSwf

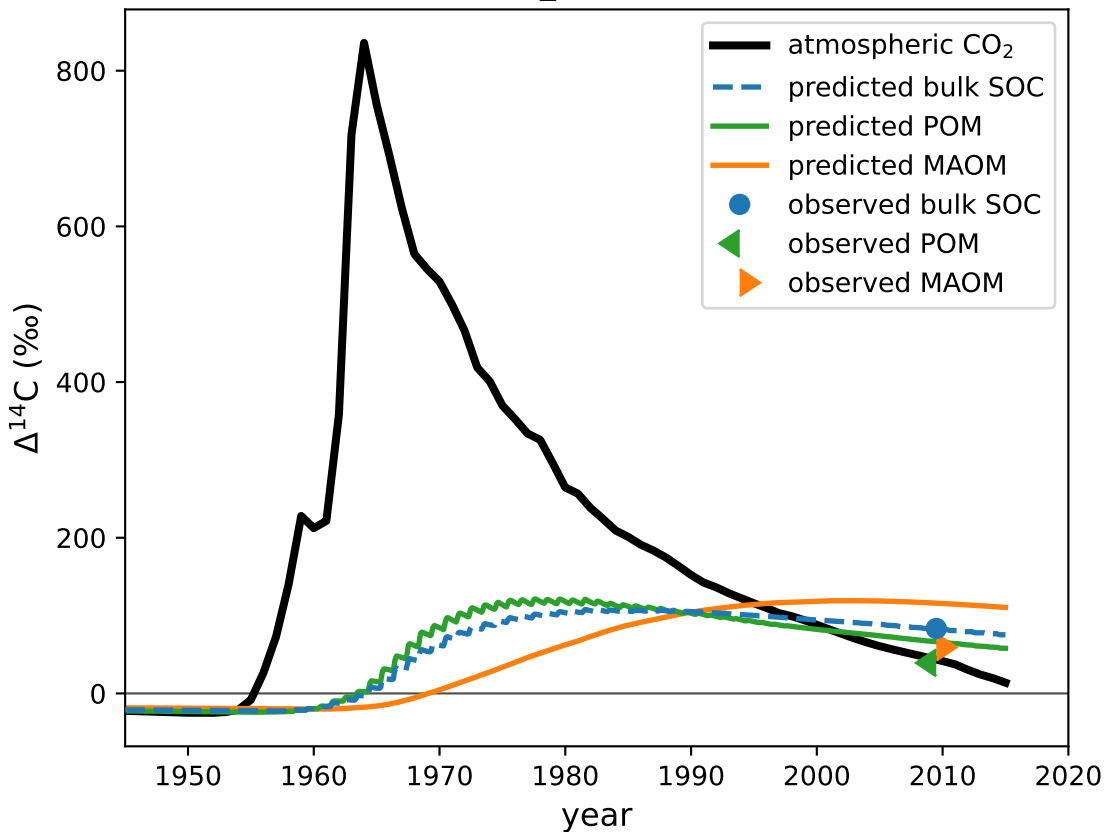

Supplement: Supplementary file 118 [file gmd-2023-242-supplement.zip]

MIMICS  
Rasmussen\_2018, ANpp, ANpp

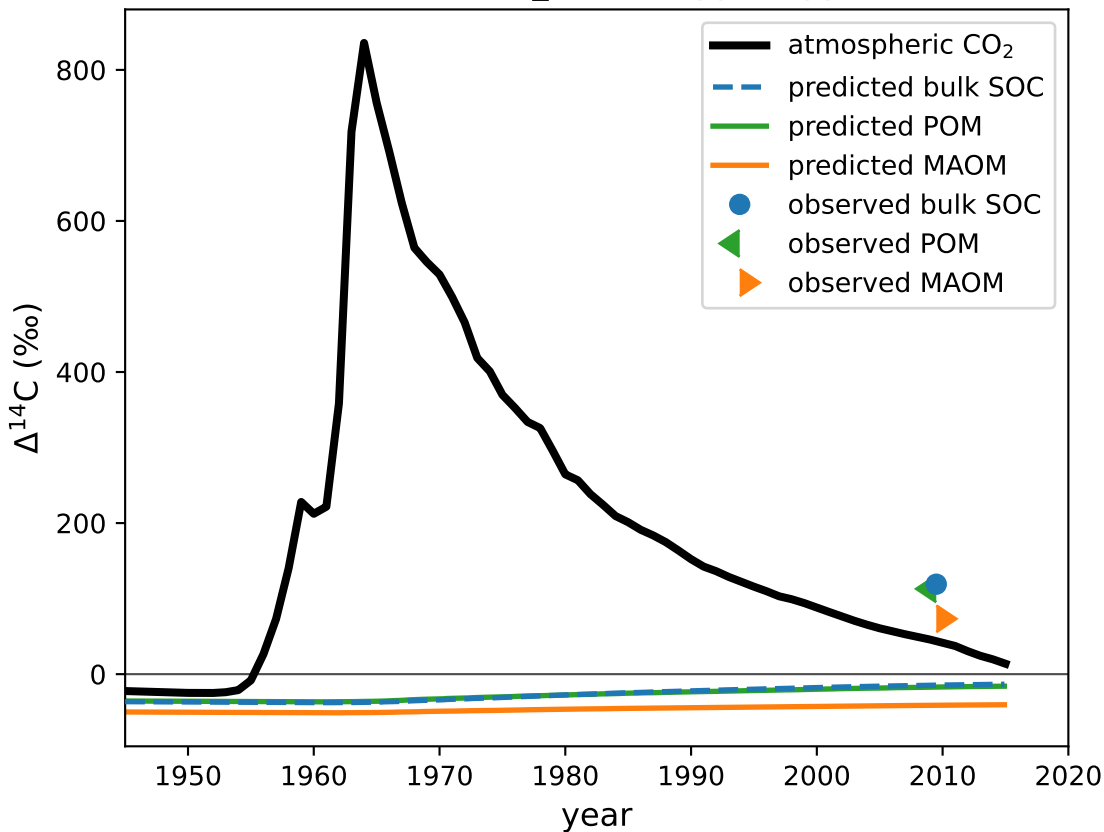

Supplement: Supplementary file 119 [file gmd-2023-242-supplement.zip]

CORPSE  
Rasmussen\_2018, GRpp, GRpp

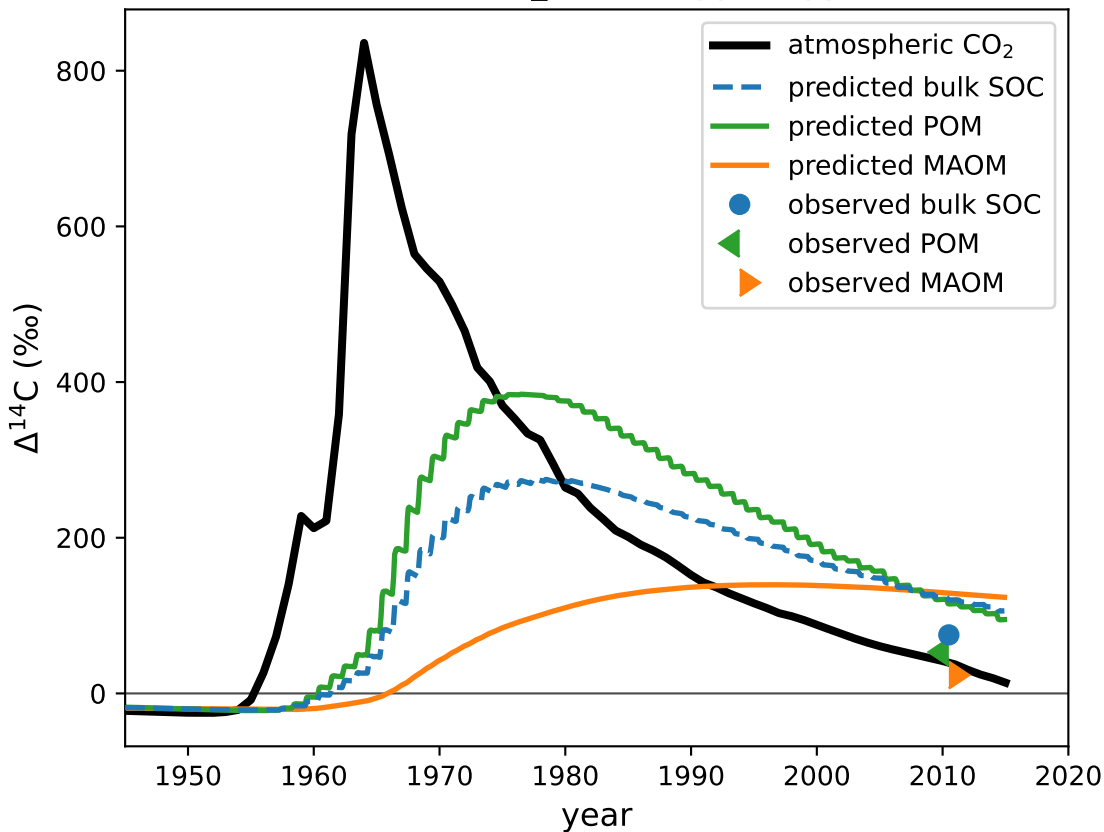

Supplement: Supplementary file 120 [file gmd-2023-242-supplement.zip]

MIMICS  
Heckman\_2018, HI\_Andisol, WPL1204

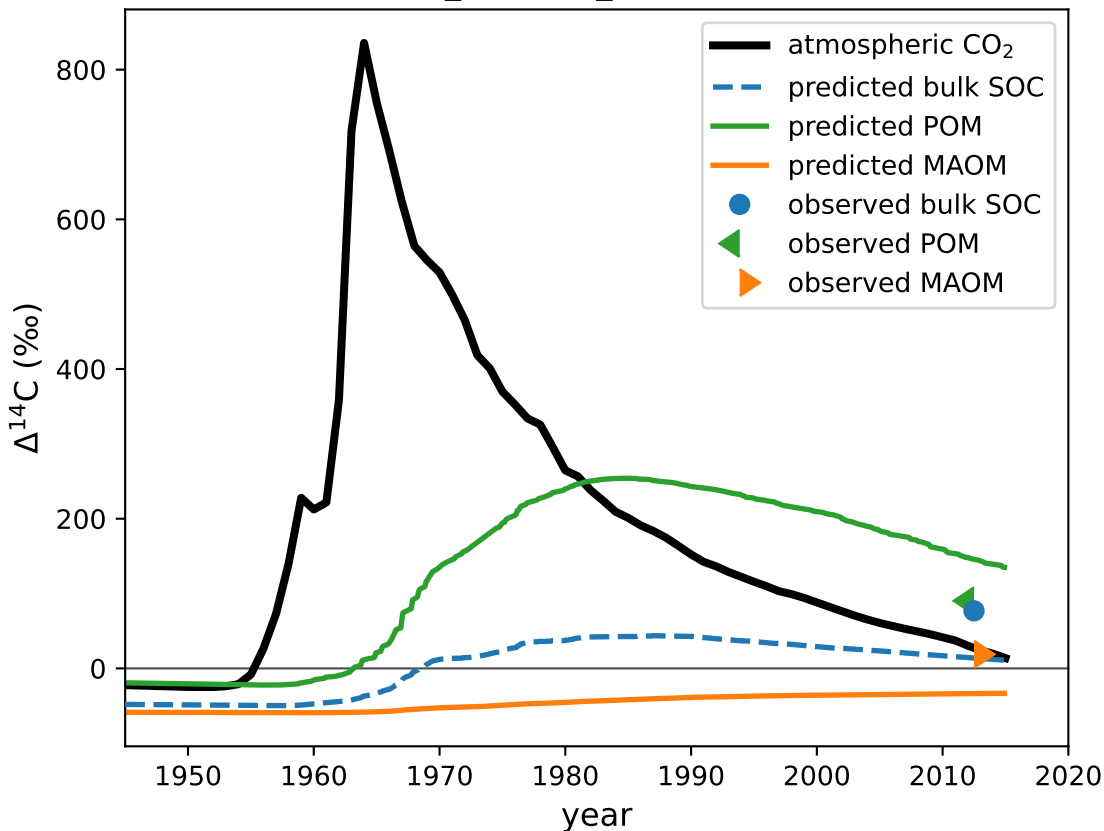

Supplement: Supplementary file 121 [file gmd-2023-242-supplement.zip]

SOMic  
McFarlane\_2013, Mi-Fine Colonial Point, C3

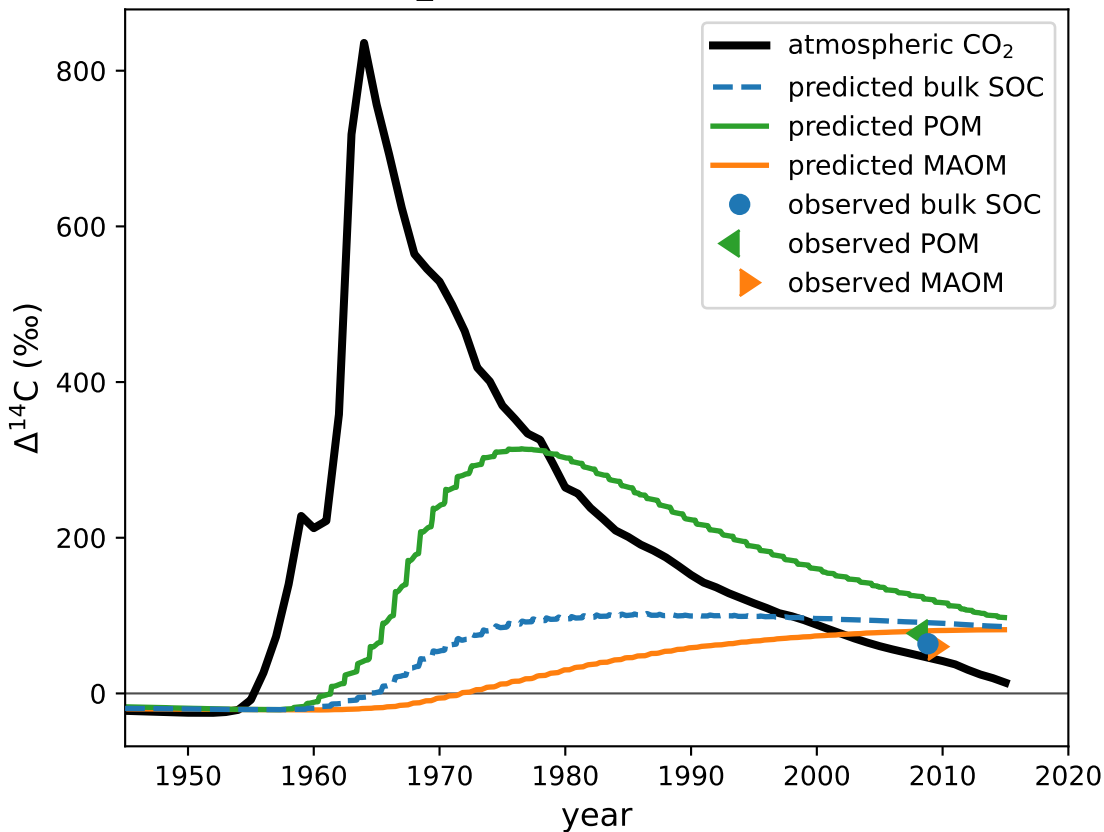

Supplement: Supplementary file 122 [file gmd-2023-242-supplement.zip]

Millennial  
McFarlane\_2013, MA Harvard Forest, H5

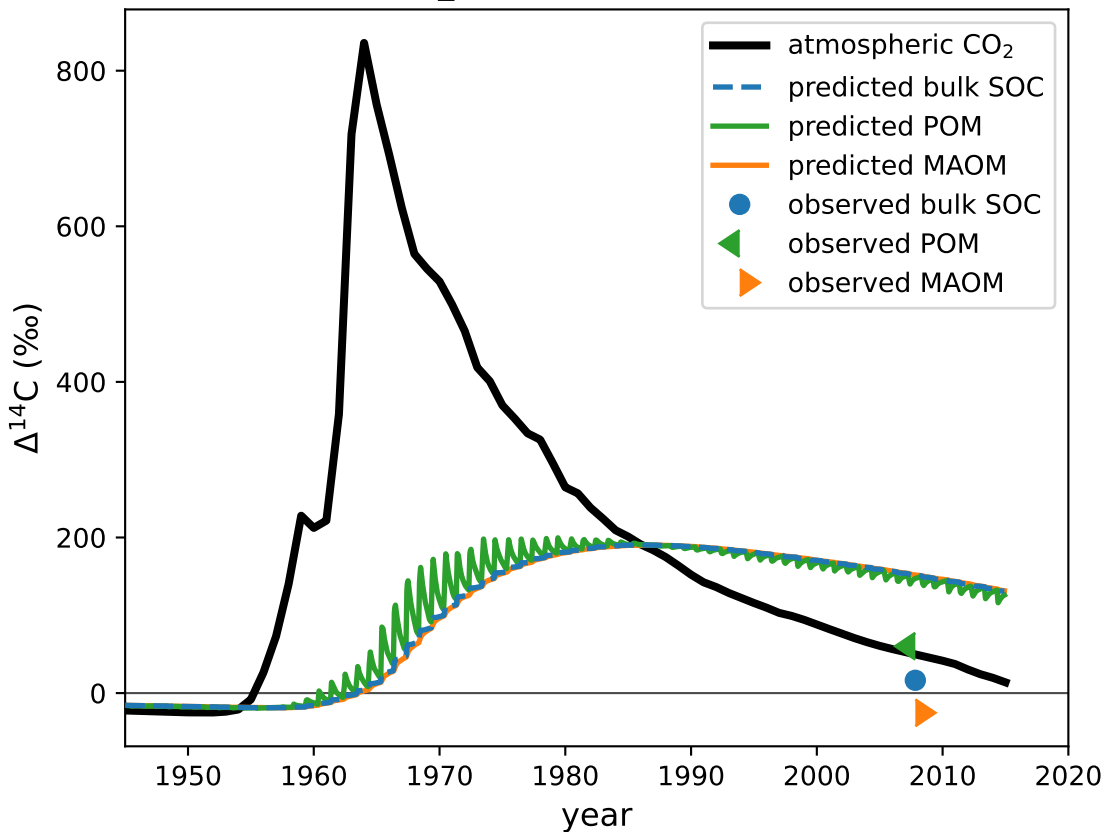

Supplement: Supplementary file 123 [file gmd-2023-242-supplement.zip]

CORPSE  
Marin-Spiotta\_2008, Sierra de Cayey, 20yr secondary forest

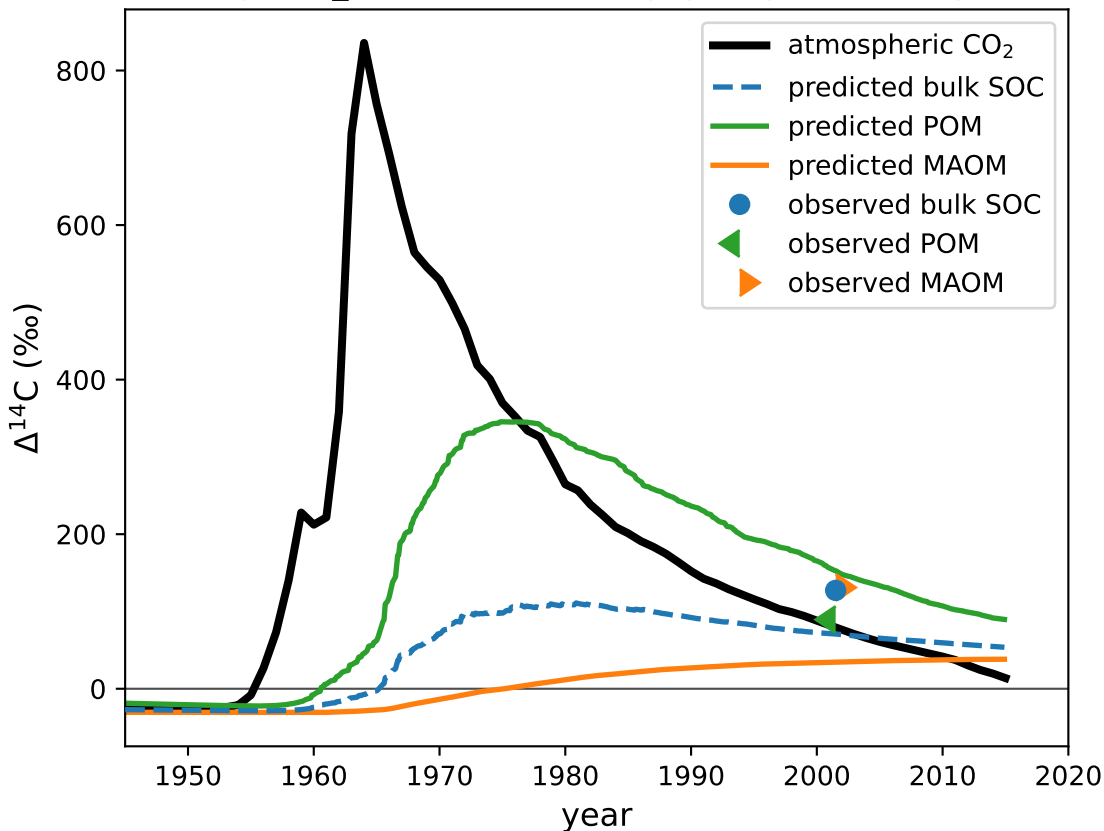

Supplement: Supplementary file 124 [file gmd-2023-242-supplement.zip]

SOMic  
Schrumpf\_2013, Hainich, Hainich.1

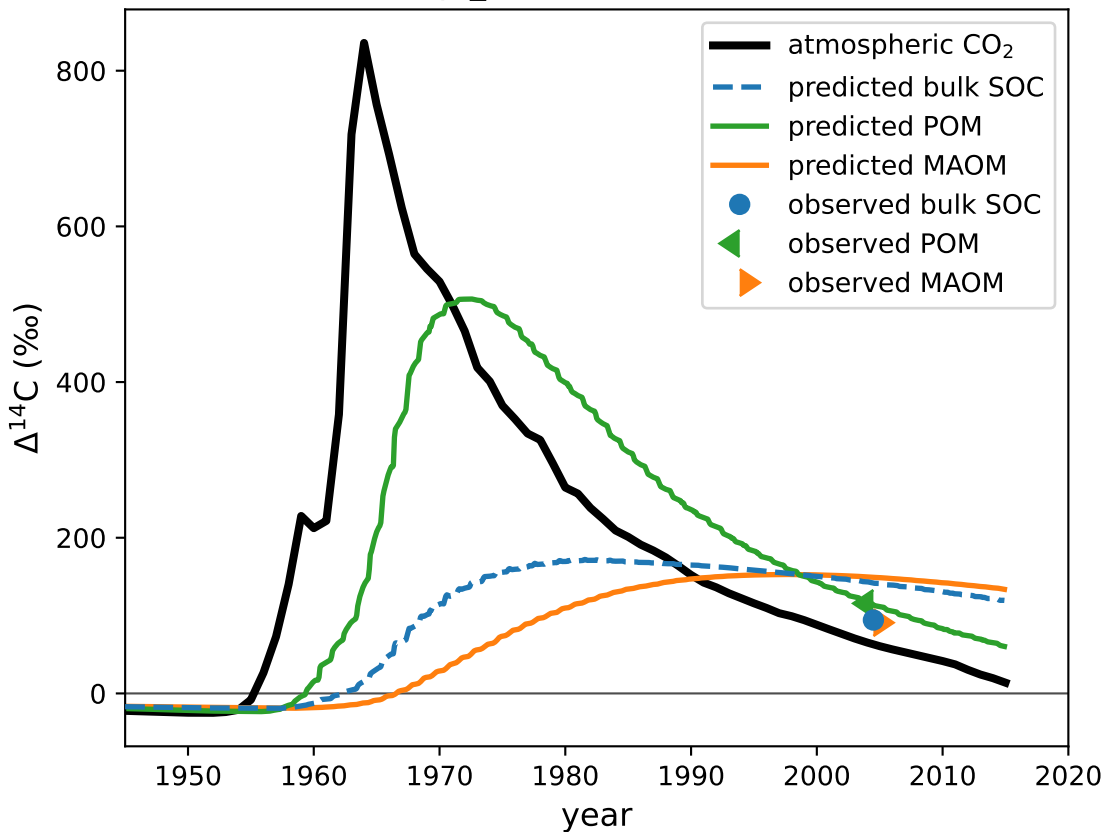

Supplement: Supplementary file 125 [file gmd-2023-242-supplement.zip]

MIMICS  
Marin-Spiotta\_2008, Sierra de Cayey, 10yr secondary forest

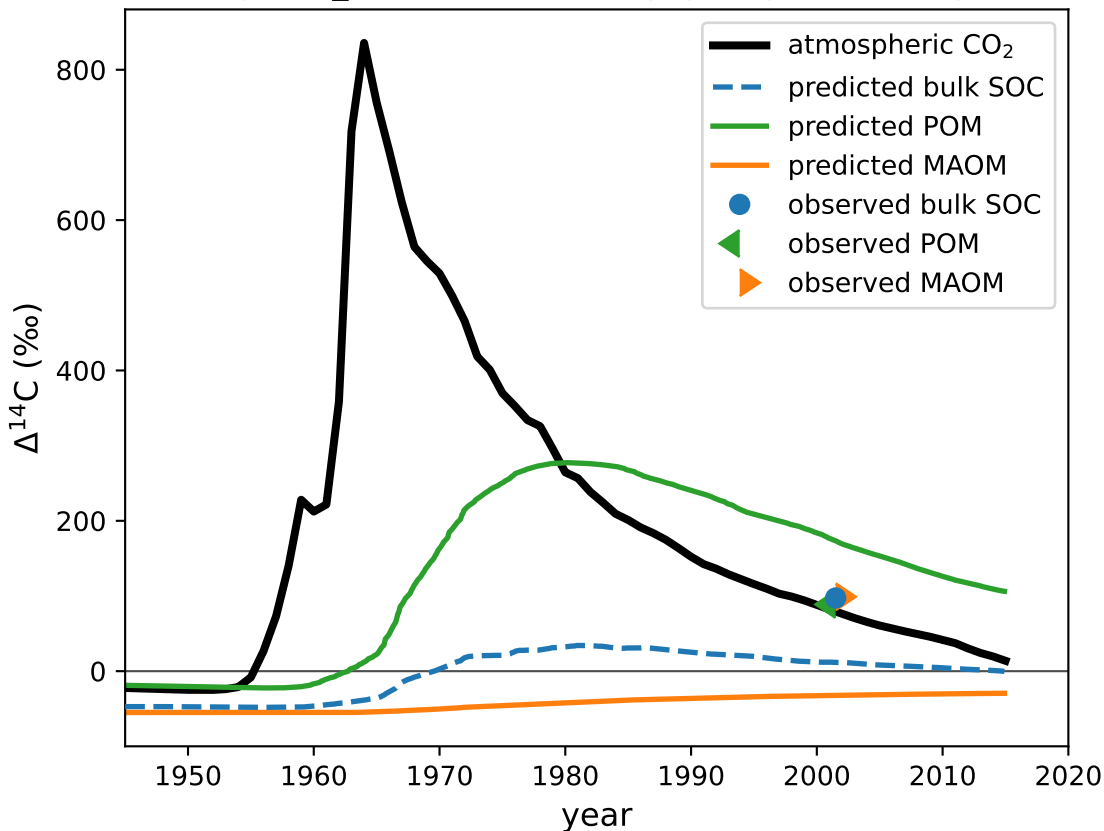

Supplement: Supplementary file 126 [file gmd-2023-242-supplement.zip]

SOMic  
McFarlane\_2013, MA Harvard Forest, H5

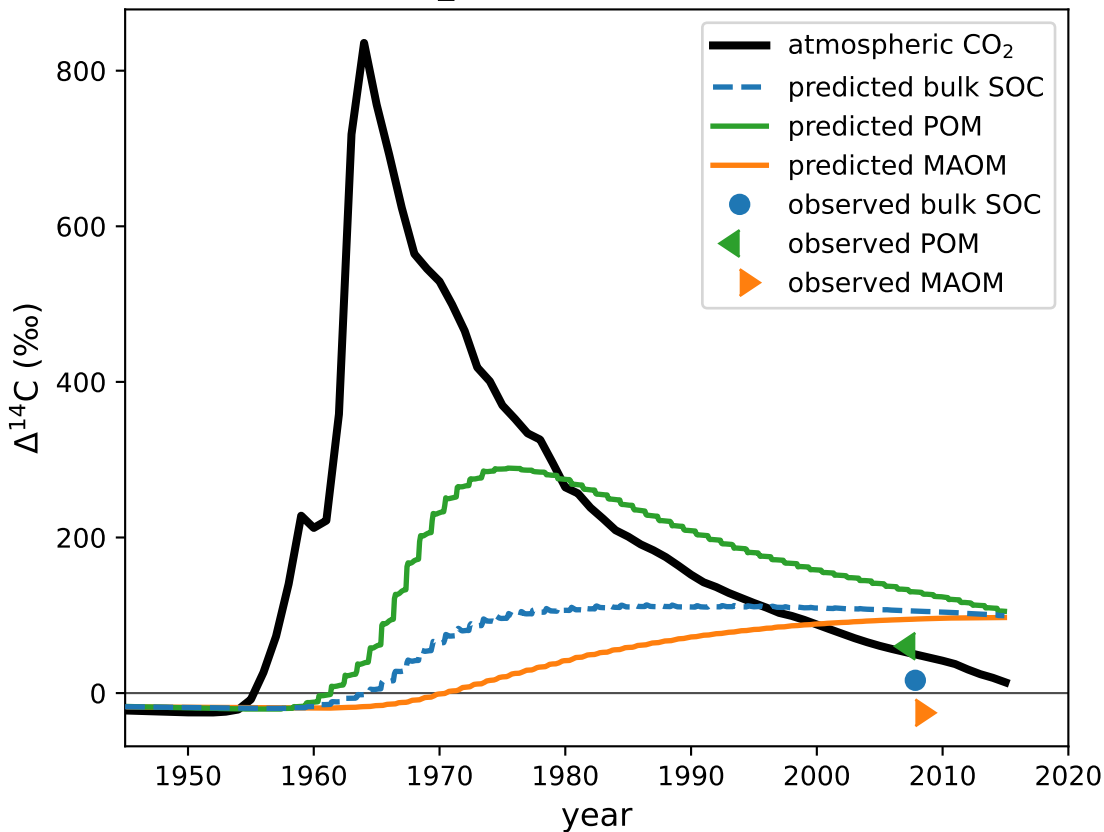

Supplement: Supplementary file 127 [file gmd-2023-242-supplement.zip]

CORPSE  
McFarlane\_2013, NH Bartlett Forest, B1

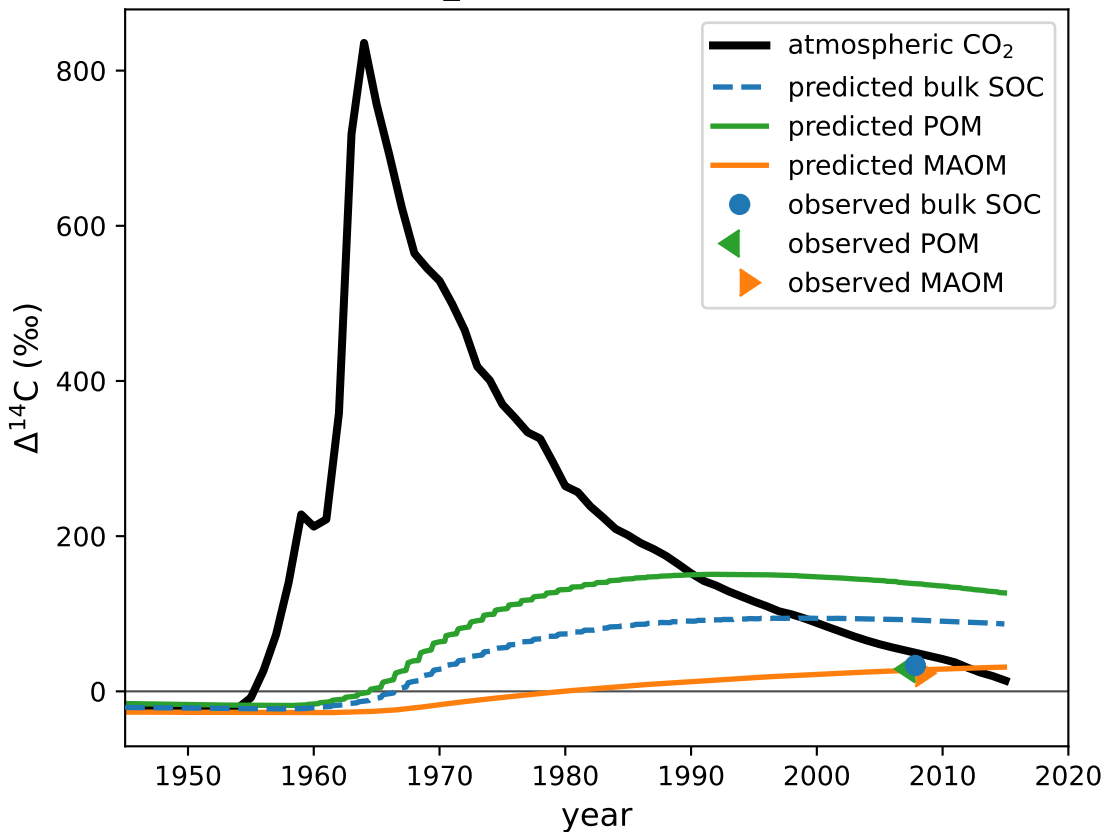

Supplement: Supplementary file 128 [file gmd-2023-242-supplement.zip]

CORPSE  
McFarlane\_2013, MI-Coarse UMBS, O2

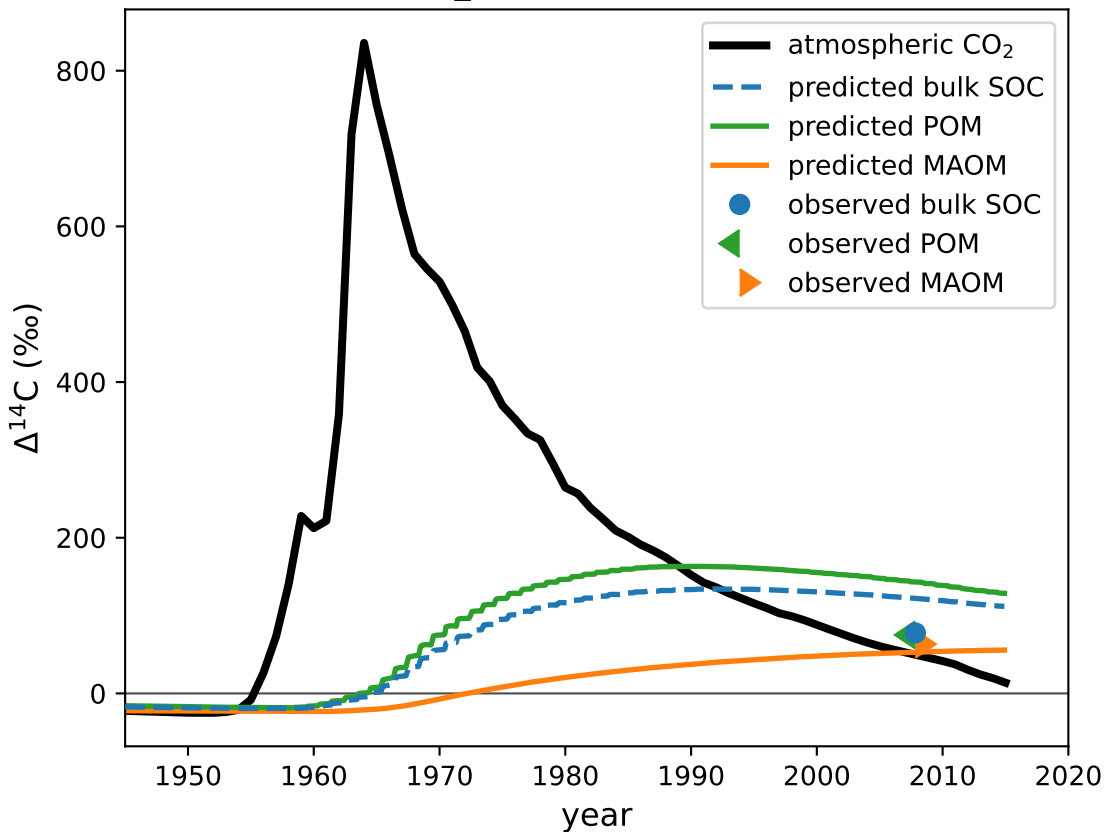

Supplement: Supplementary file 129 [file gmd-2023-242-supplement.zip]

CORPSE  
Schrumpf\_2013, Grignon, Grignon.1

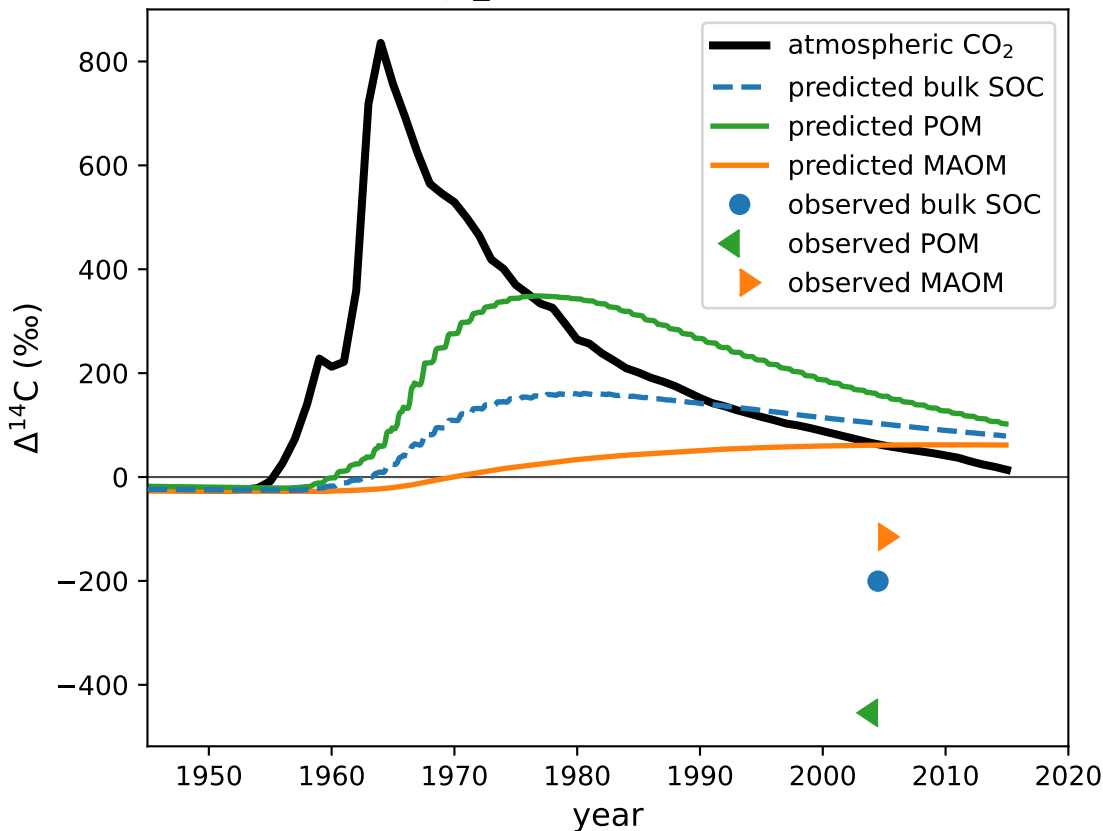

Supplement: Supplementary file 130 [file gmd-2023-242-supplement.zip]

SOMic  
Heckman\_2010, Flagstaff Basalt, FGBA\_composite

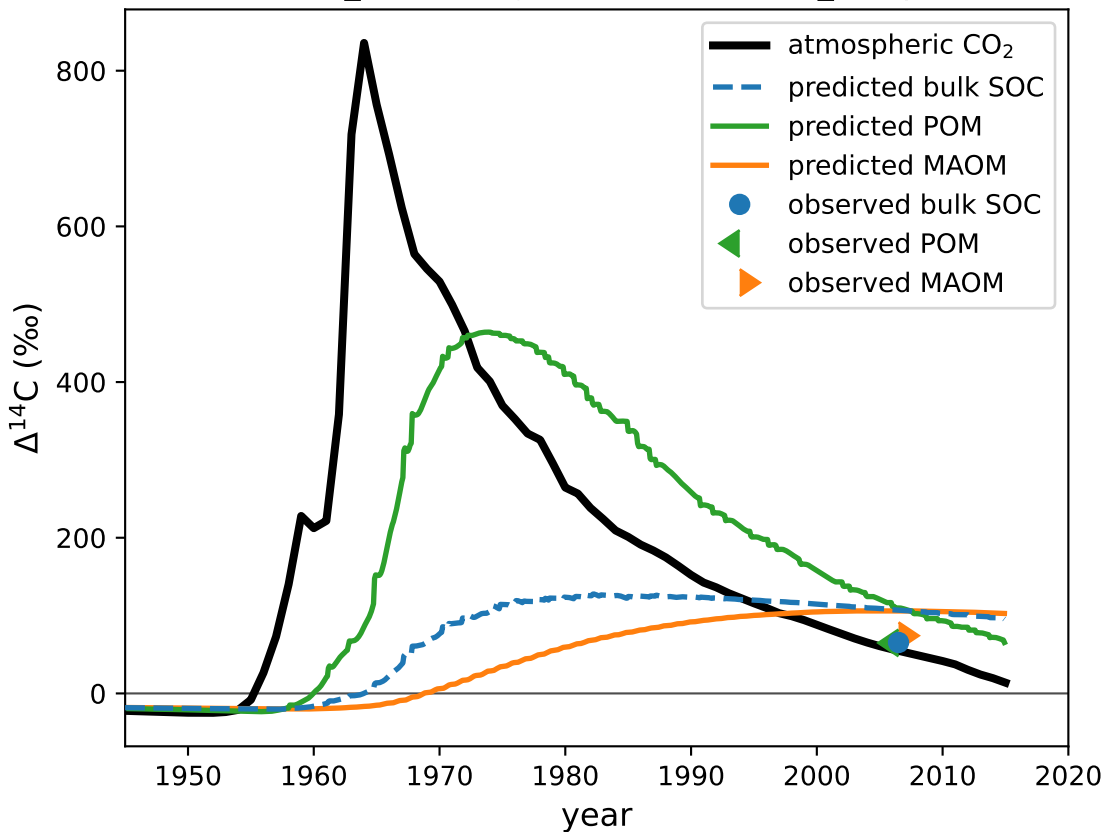

Supplement: Supplementary file 131 [file gmd-2023-242-supplement.zip]

SOMic  
Lybrand\_2017, Catalina CZO desert, desert scrub\_convergent

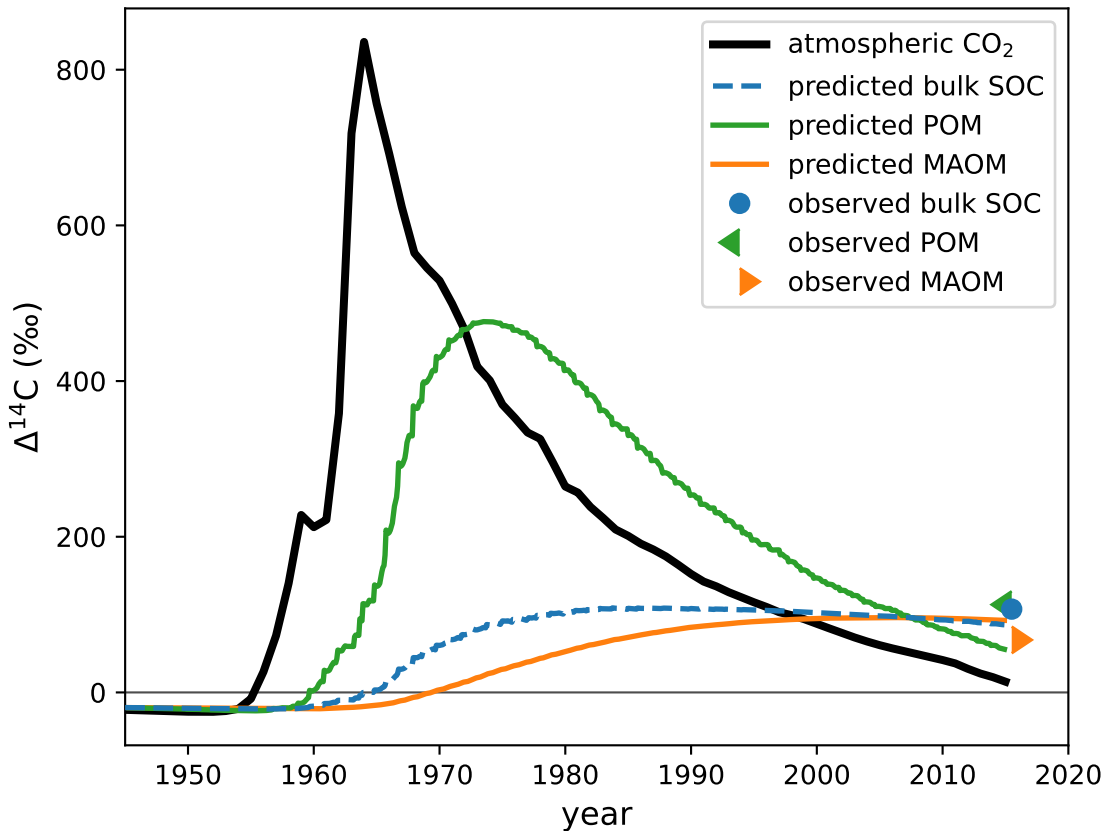

Supplement: Supplementary file 132 [file gmd-2023-242-supplement.zip]

Millennial  
Berhe\_2012, Tennessee Valley, slope comp

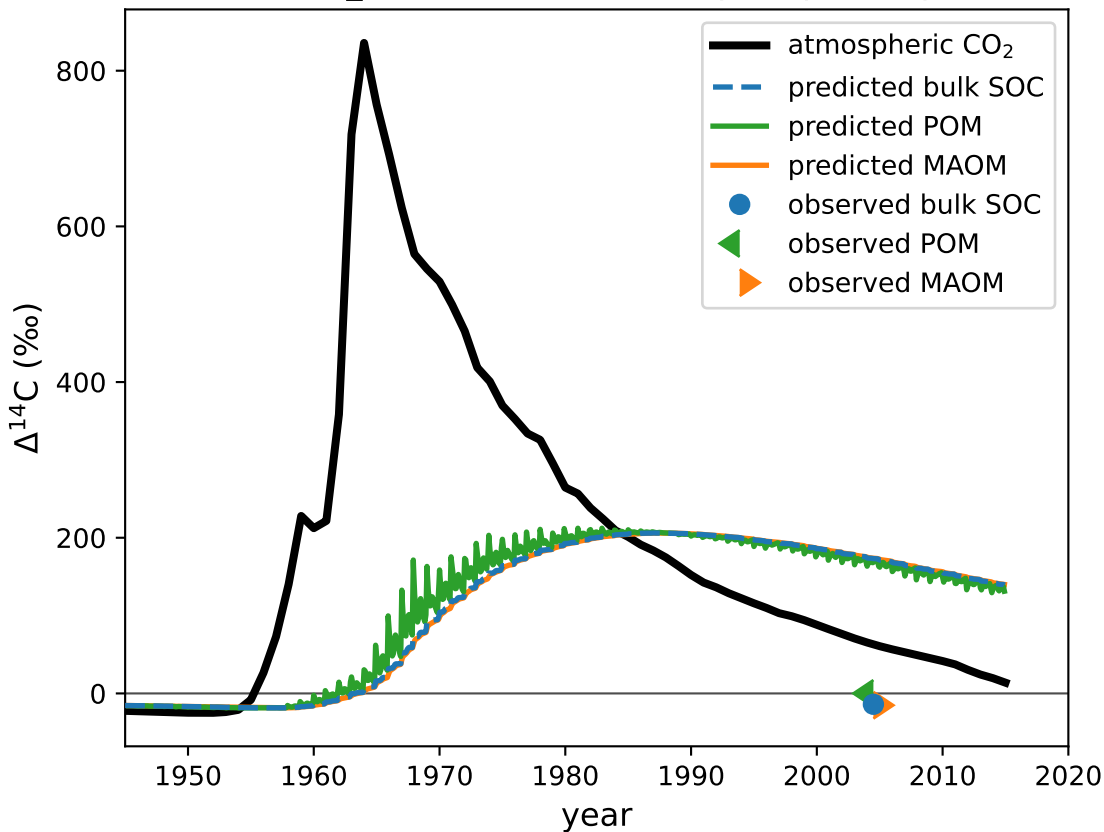

Supplement: Supplementary file 133 [file gmd-2023-242-supplement.zip]

CORPSE  
McFarlane\_2013, MA Harvard Forest, H1

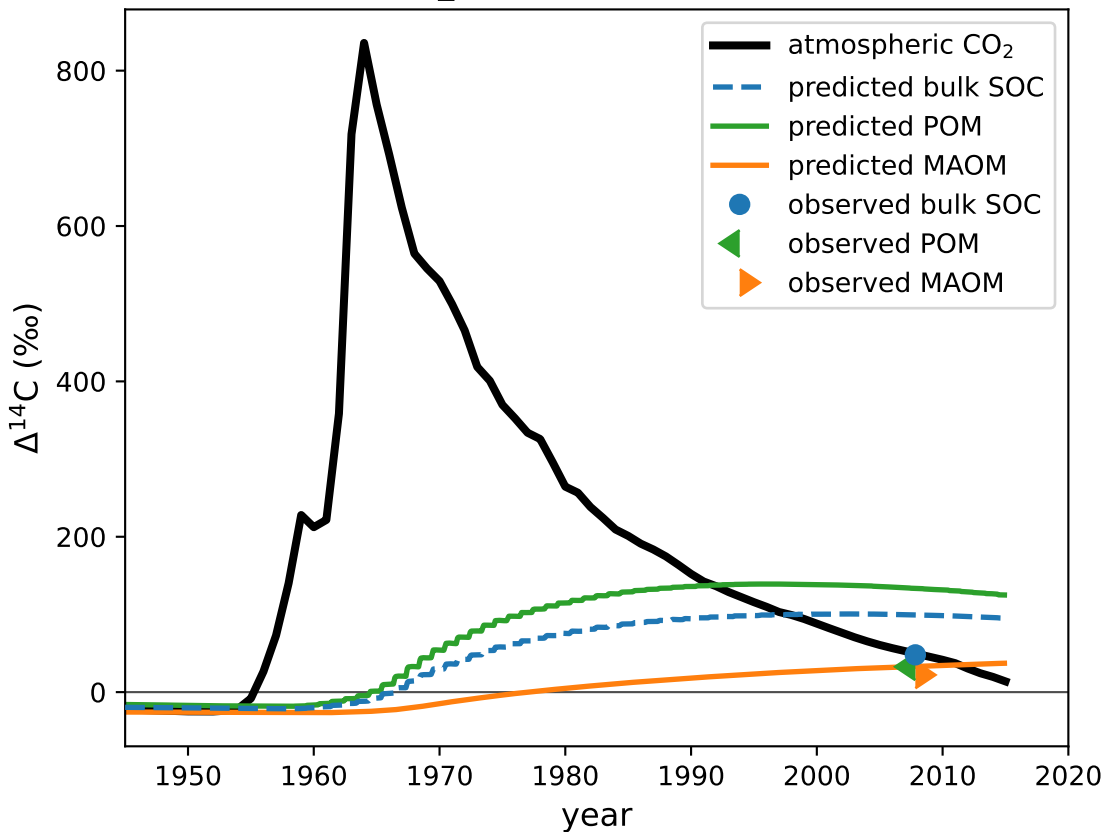

Supplement: Supplementary file 134 [file gmd-2023-242-supplement.zip]

CORPSE  
McFarlane\_2013, MO Ozark BREA, M4

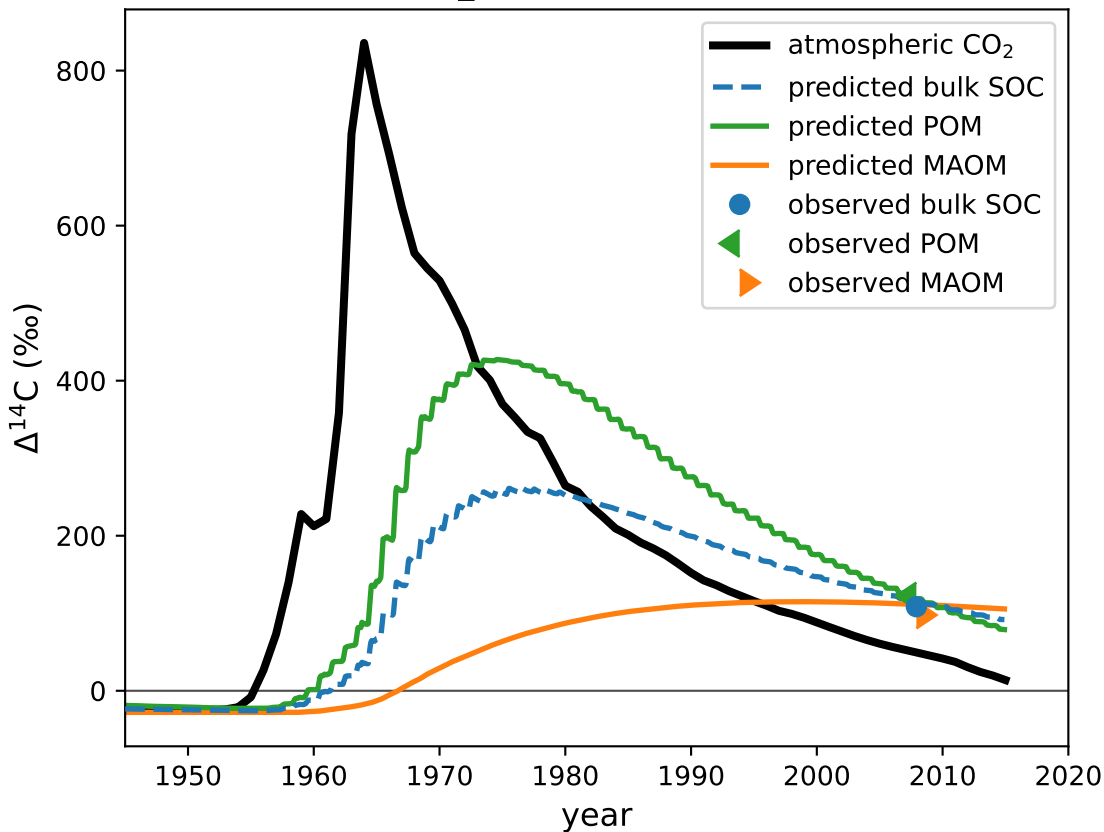

Supplement: Supplementary file 135 [file gmd-2023-242-supplement.zip]

SOMic  
Schrumpf\_2013, Bugac, Bugac.1

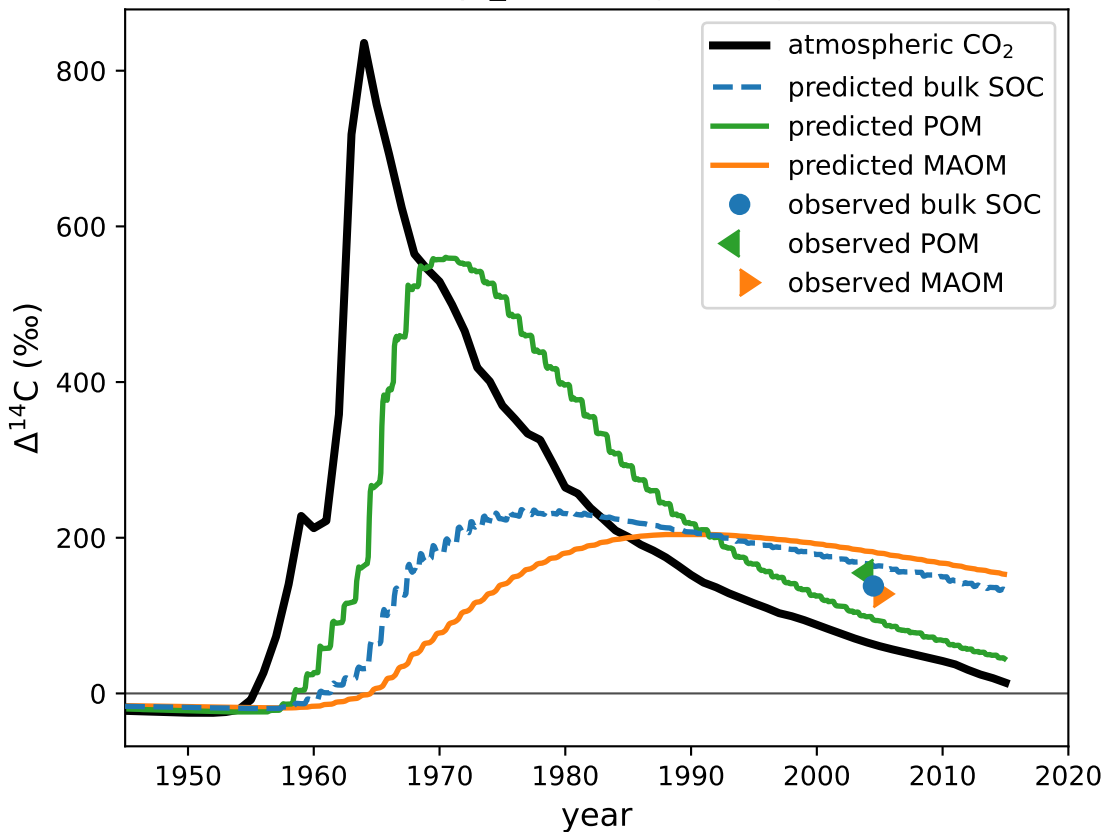

Supplement: Supplementary file 136 [file gmd-2023-242-supplement.zip]

SOMic  
Meyer\_2012, Stubai, Pasture

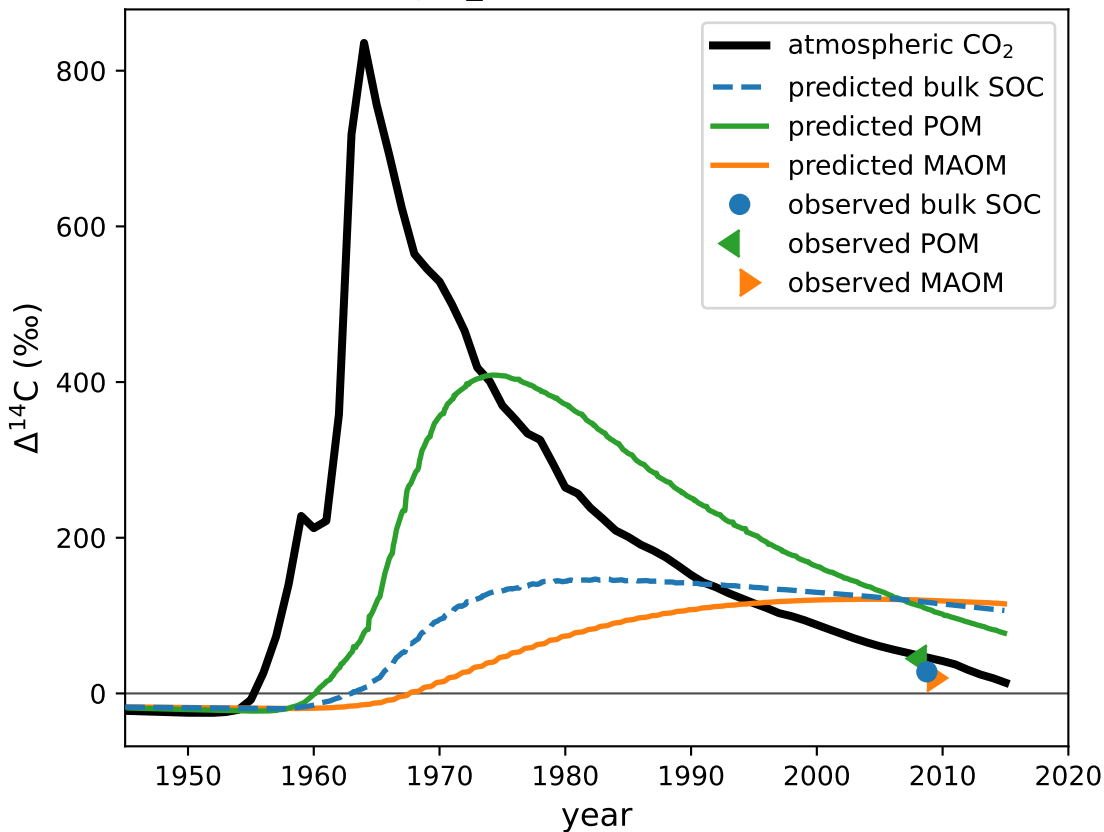

Supplement: Supplementary file 137 [file gmd-2023-242-supplement.zip]

MIMICS  
McFarlane\_2013, NH Bartlett Forest, B1

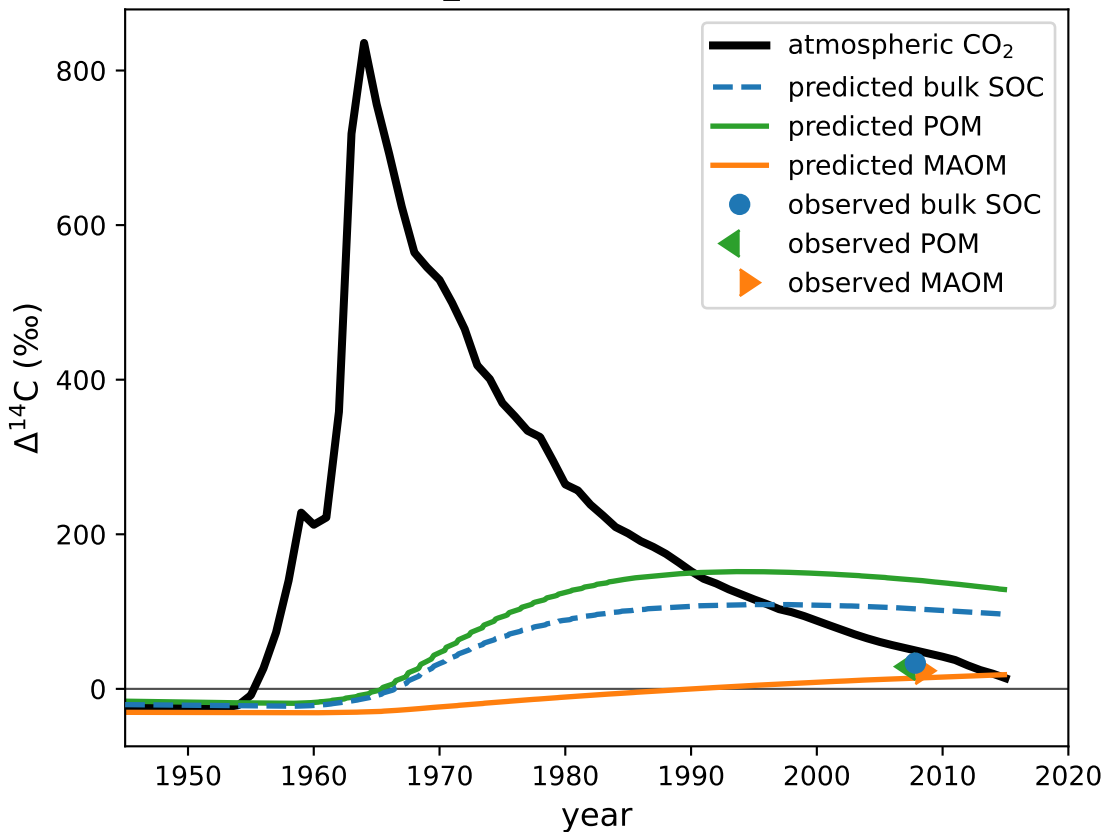

Supplement: Supplementary file 138 [file gmd-2023-242-supplement.zip]

## MEND

Lybrand\_2017, Catalina CZO desert, desert scrub\_divergent

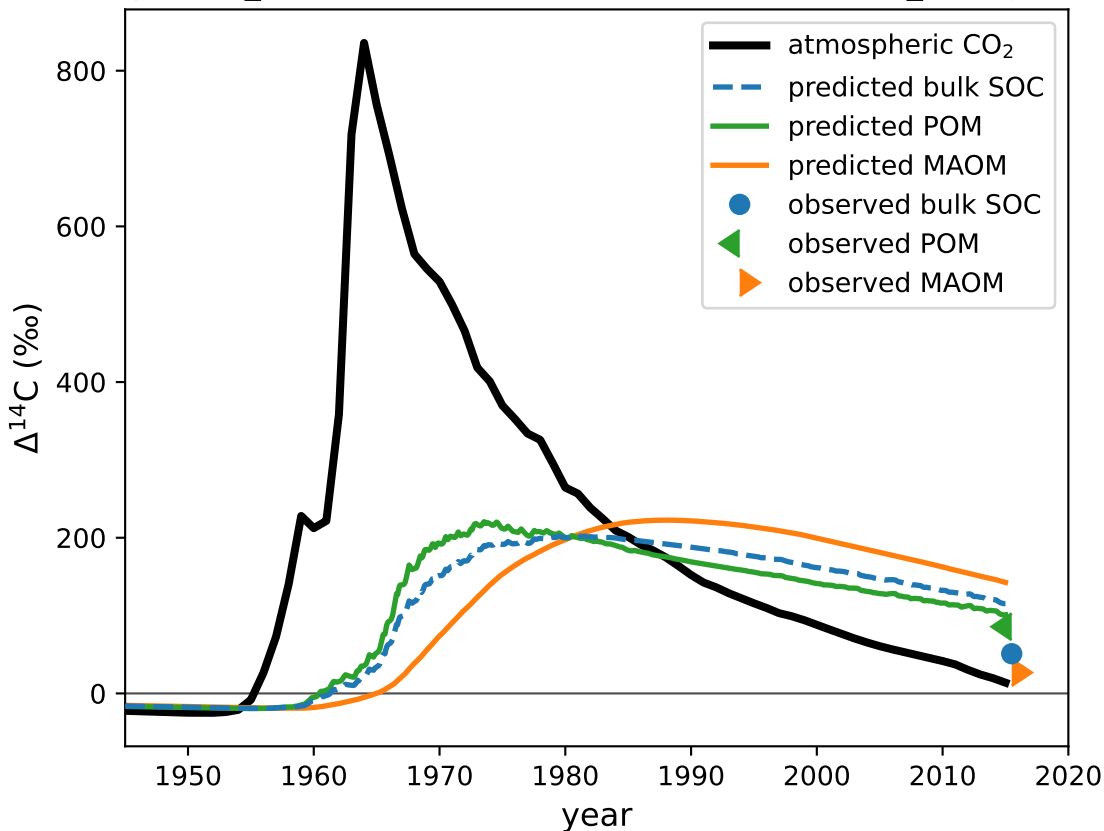

Supplement: Supplementary file 139 [file gmd-2023-242-supplement.zip]

SOMic  
Schrumpf\_2013, Gebesee, Gebesee.1

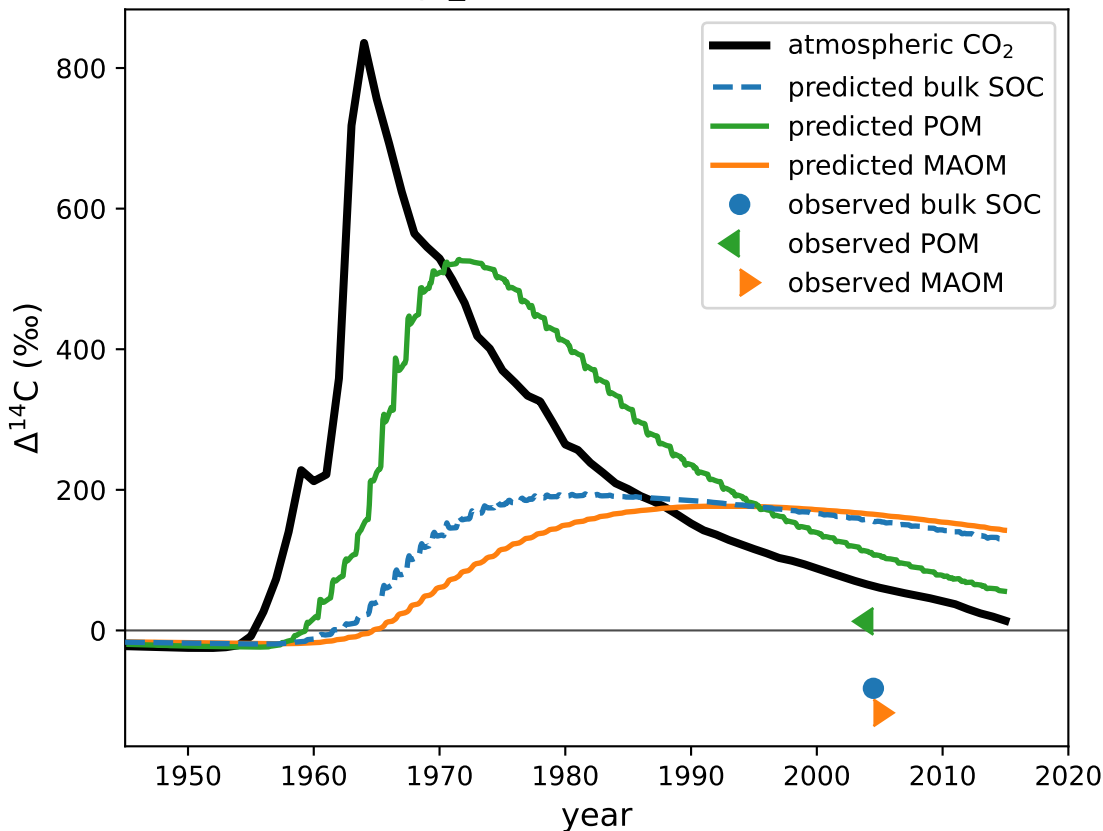

Supplement: Supplementary file 140 [file gmd-2023-242-supplement.zip]

Millennial  
McFarlane\_2013, Mi-Fine Colonial Point, C2

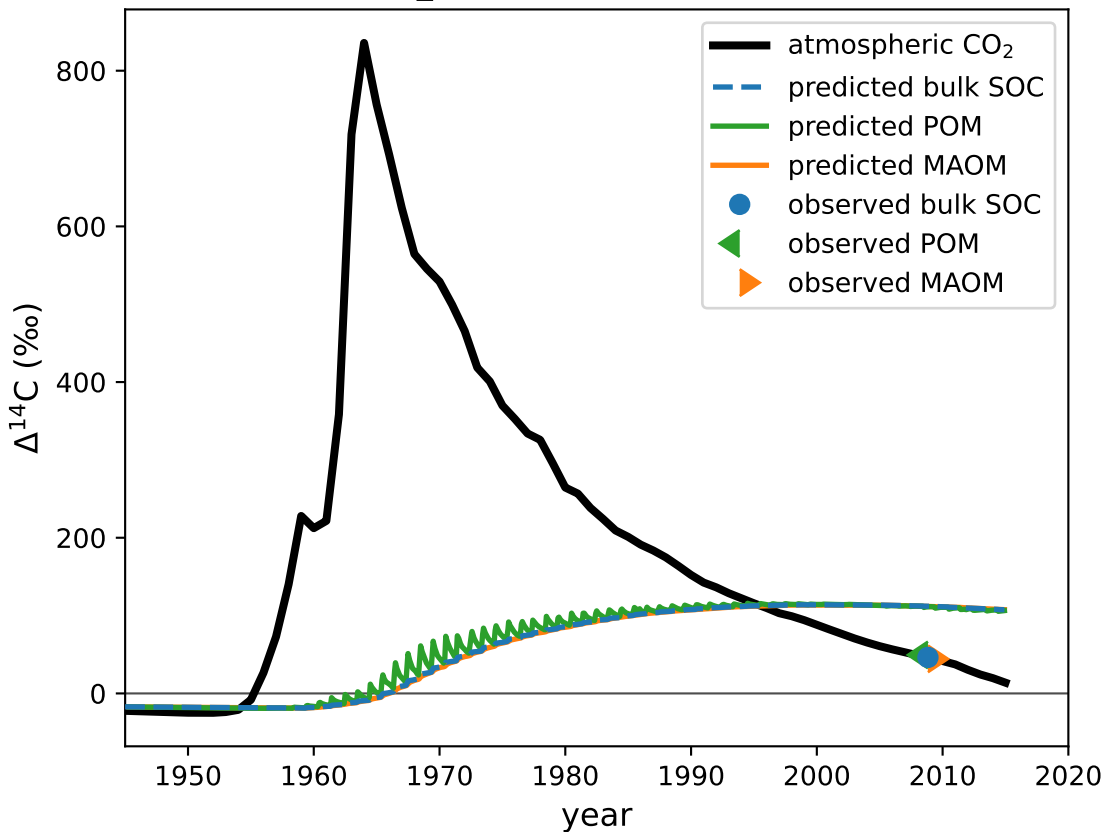

Supplement: Supplementary file 141 [file gmd-2023-242-supplement.zip]

MEND  
Rasmussen\_2018, ANpp, ANpp

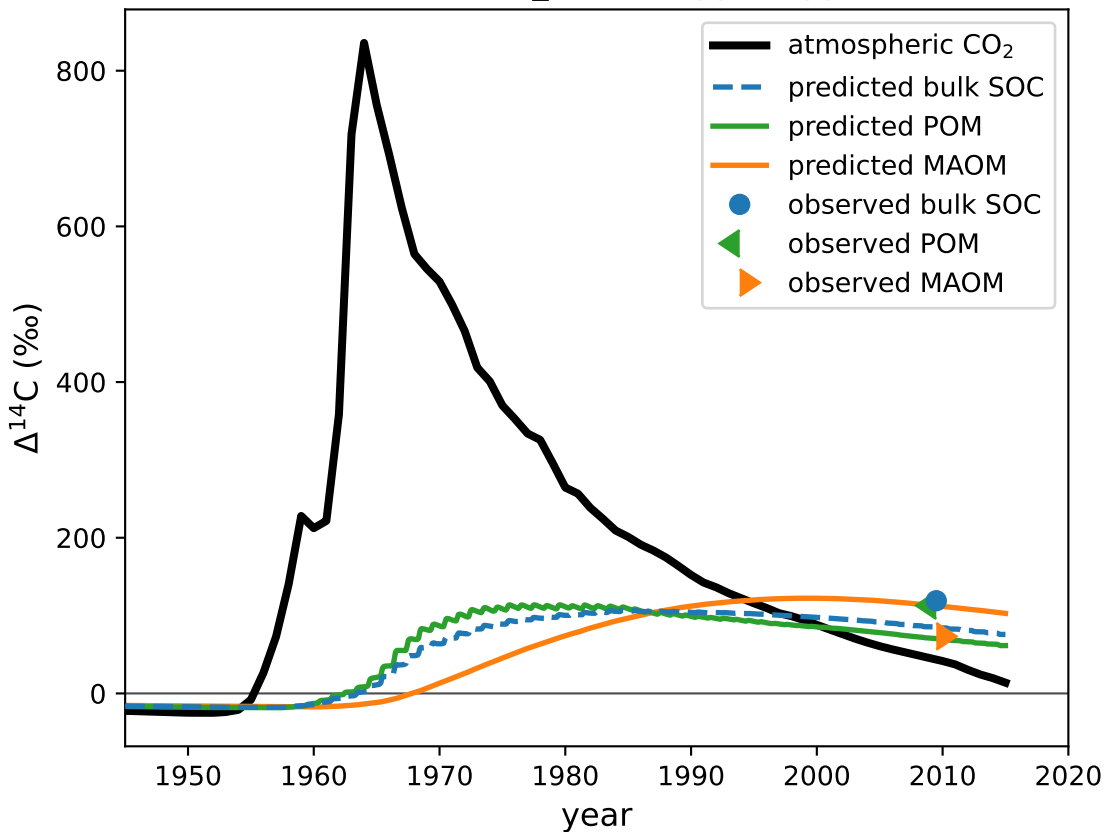

Supplement: Supplementary file 142 [file gmd-2023-242-supplement.zip]

MEND  
Harden\_2002, Dinesen, DPPR2

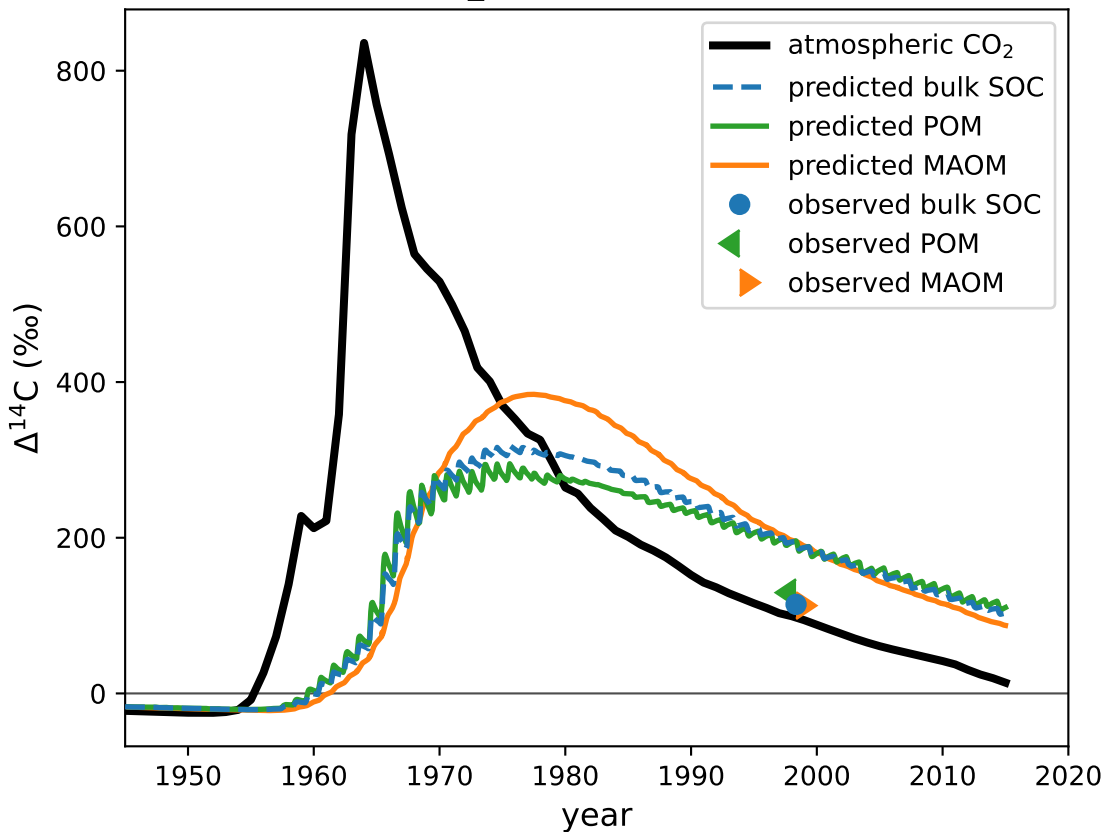

Supplement: Supplementary file 143 [file gmd-2023-242-supplement.zip]

SOMic  
McFarlane\_2013, Mi-Fine Colonial Point, C5

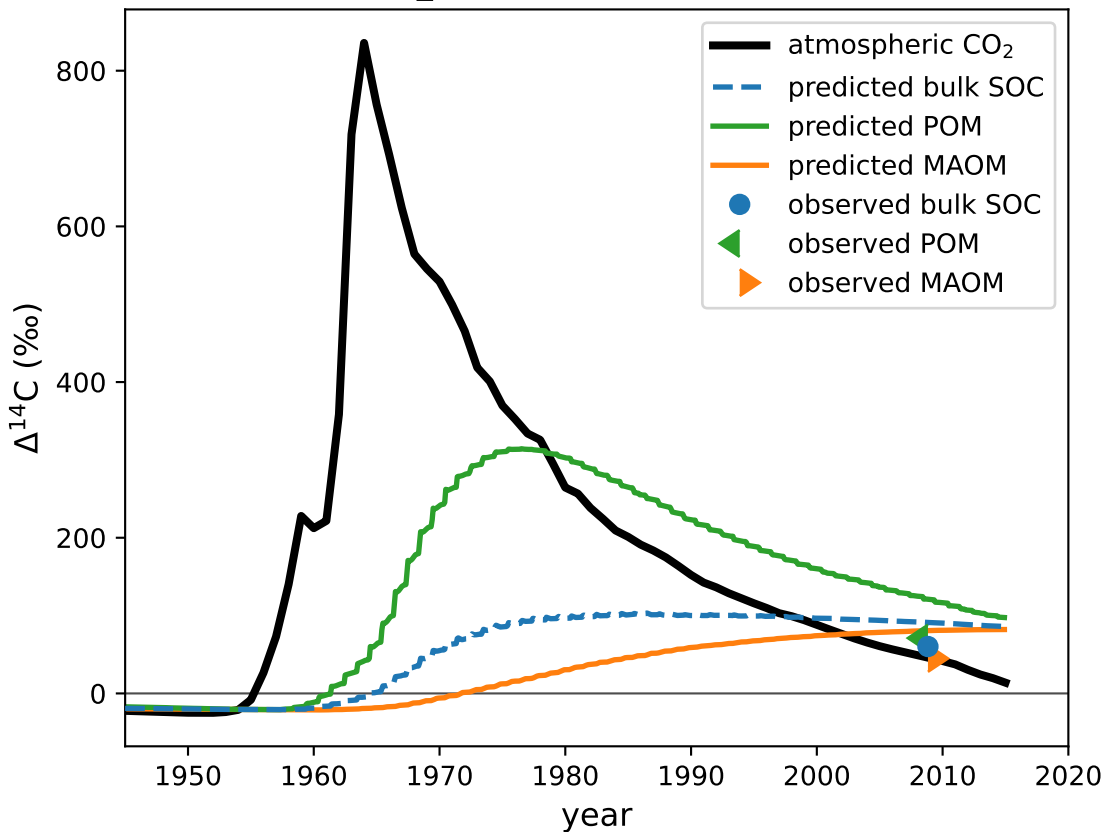

Supplement: Supplementary file 144 [file gmd-2023-242-supplement.zip]

Millennial  
McFarlane\_2013, MI-Coarse UMBS, D4

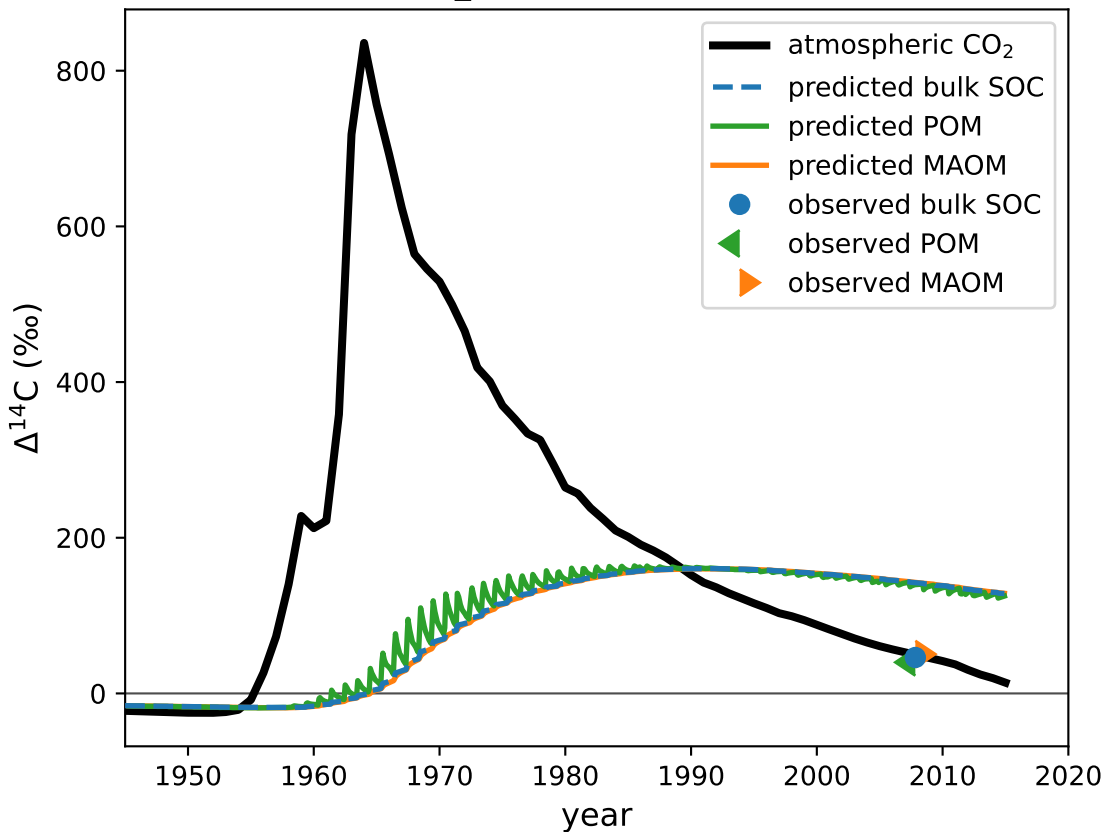

Supplement: Supplementary file 145 [file gmd-2023-242-supplement.zip]

Millennial  
Meyer\_2012, Matsch, Abandoned

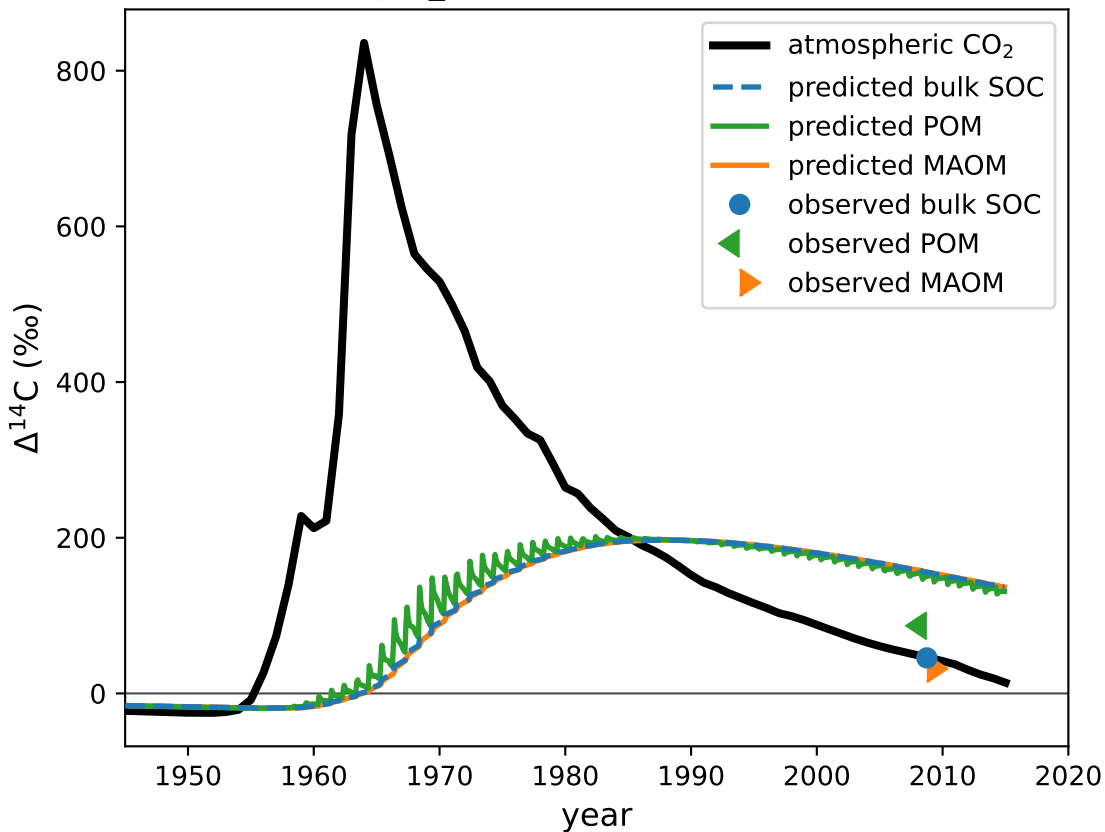

Supplement: Supplementary file 146 [file gmd-2023-242-supplement.zip]

Millennial  
Schrumpf\_2013, Easter Bush, Easter Bush.1

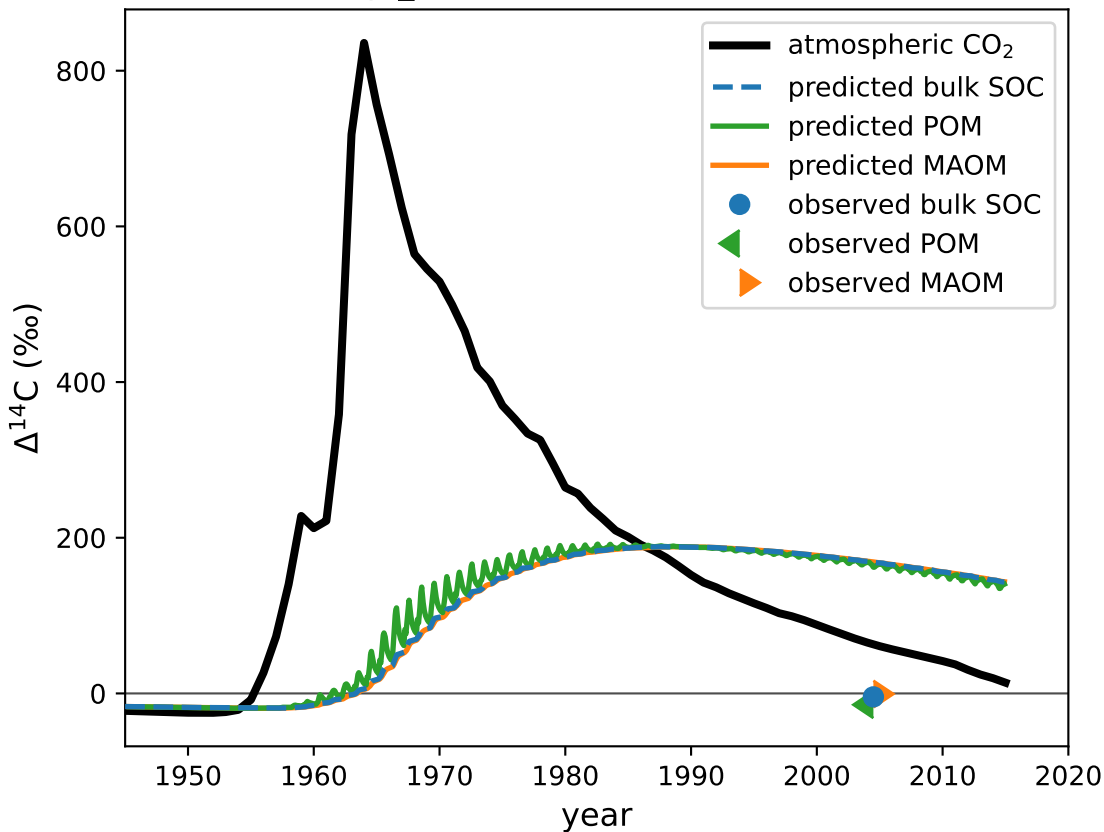

Supplement: Supplementary file 149 [file gmd-2023-242-supplement.zip]

SOMic  
Heckman\_2010, Chiricahua Rhyolite, CHRY\_composite

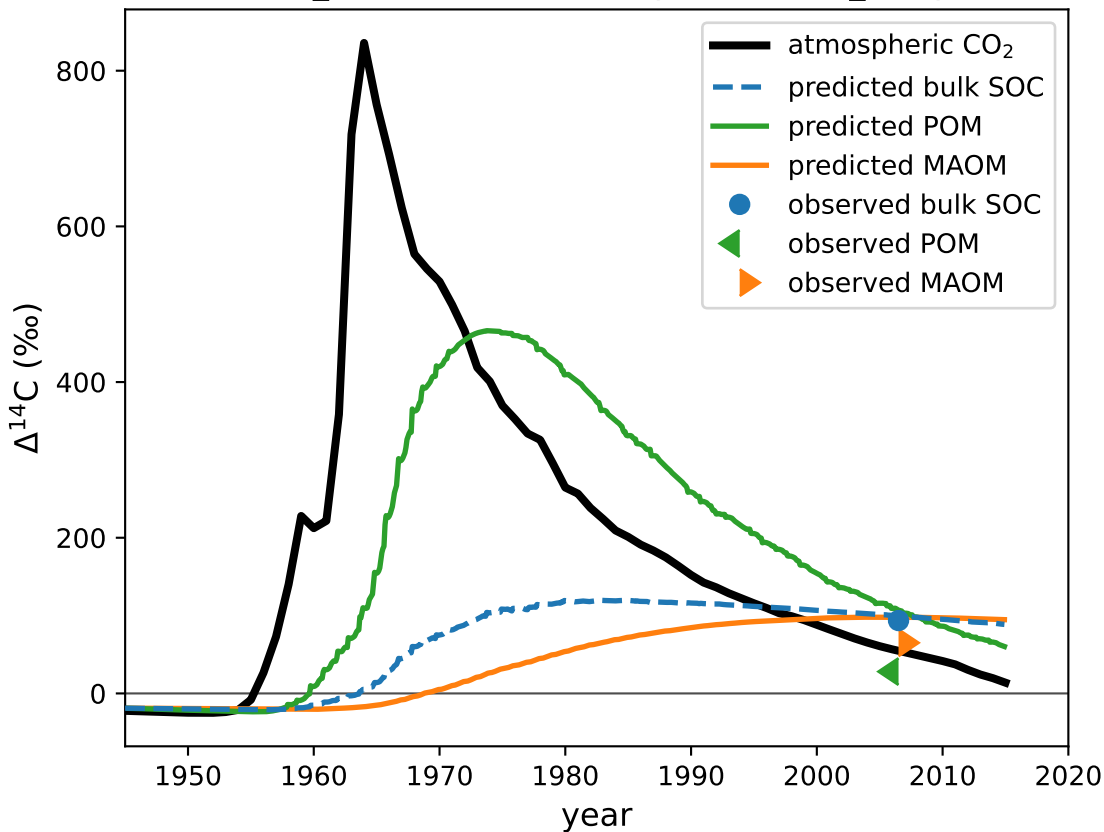

Supplement: Supplementary file 150 [file gmd-2023-242-supplement.zip]

SOMic  
McFarlane\_2013, MI-Coarse UMBS, 60M

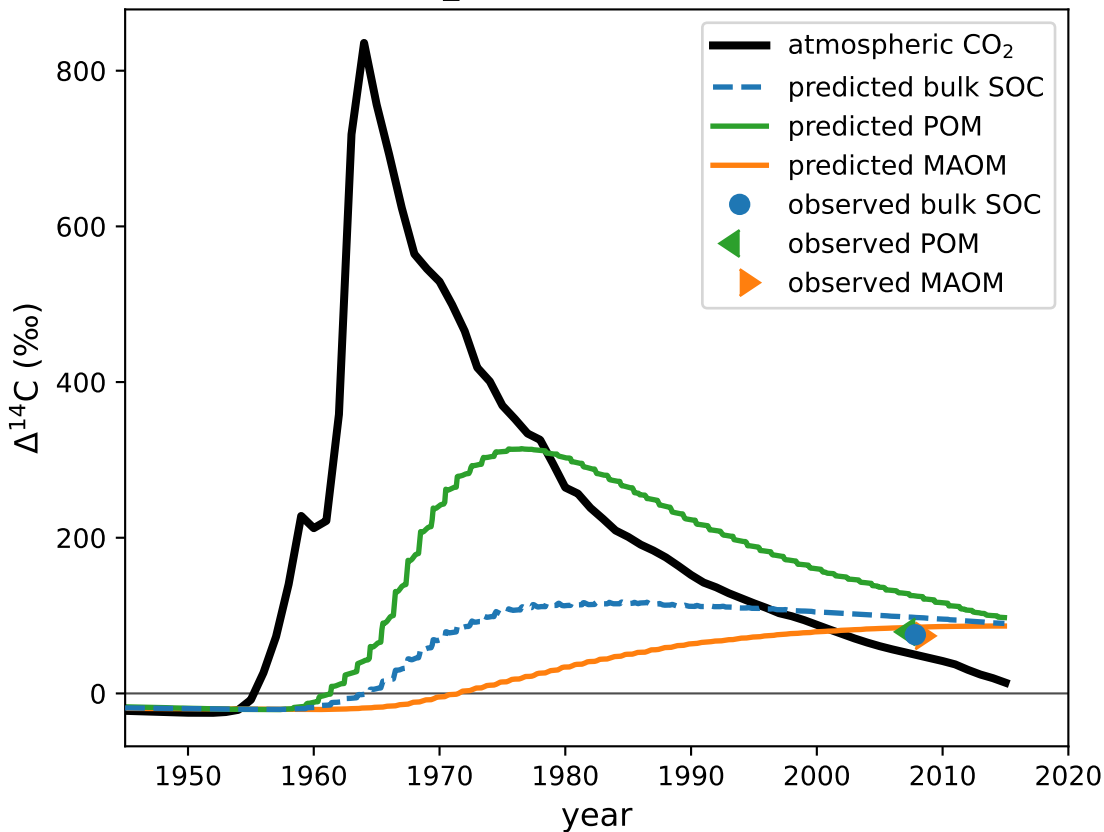

Supplement: Supplementary file 151 [file gmd-2023-242-supplement.zip]

Millennial  
McFarlane\_2013, MA Harvard Forest, H4

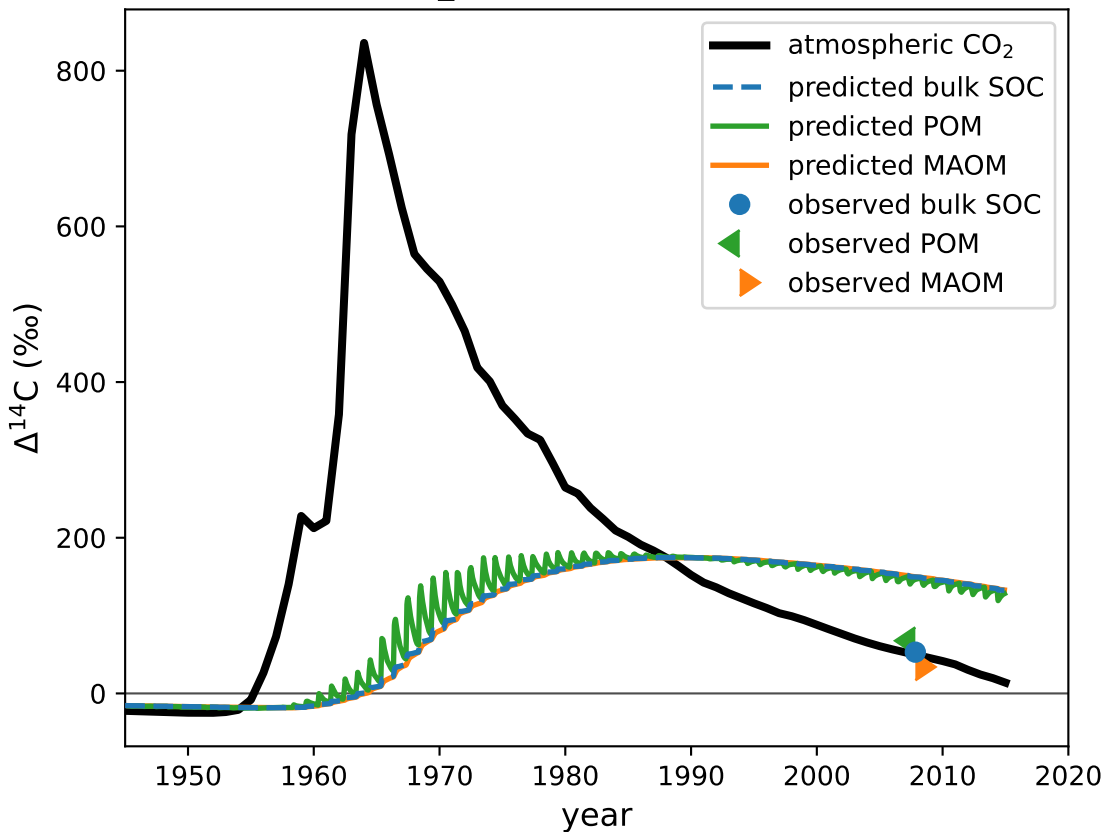

Supplement: Supplementary file 152 [file gmd-2023-242-supplement.zip]

# MEND

Marin-Spiotta\_2008, Sierra de Cayey, 80yr secondary forest

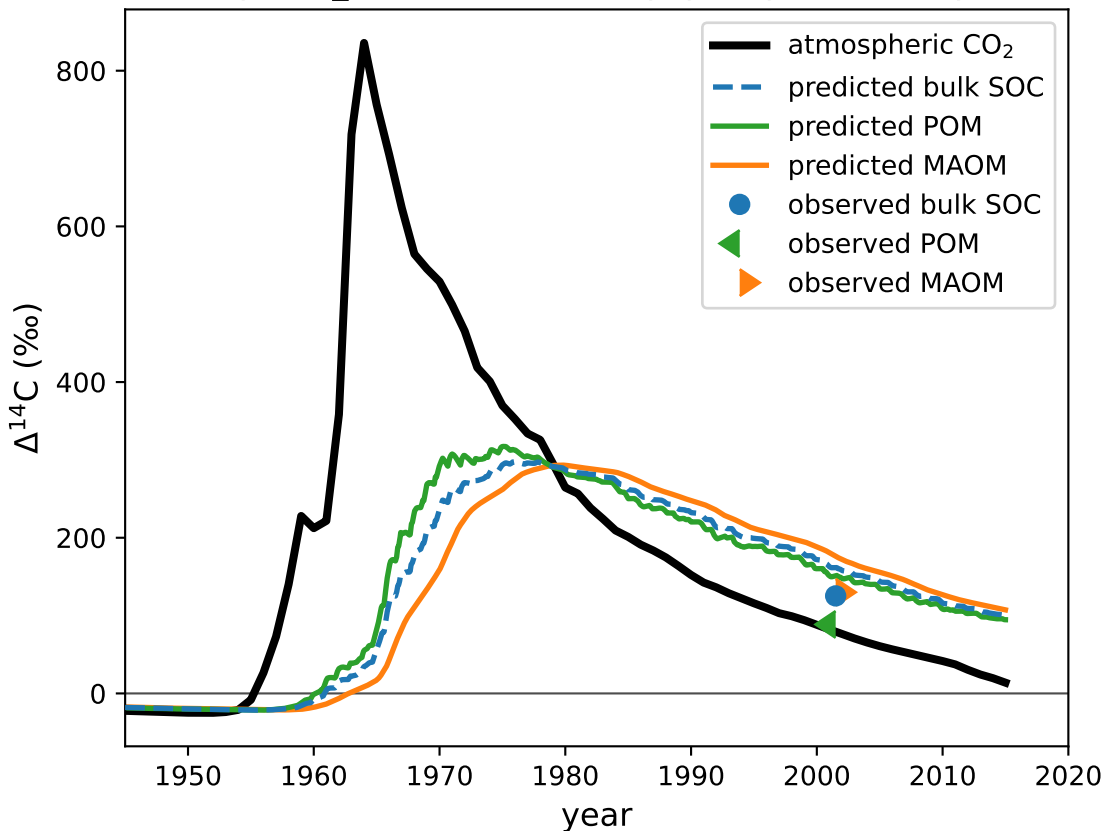

Supplement: Supplementary file 153 [file gmd-2023-242-supplement.zip]

CORPSE  
McFarlane\_2013, MO Ozark BREA, M2

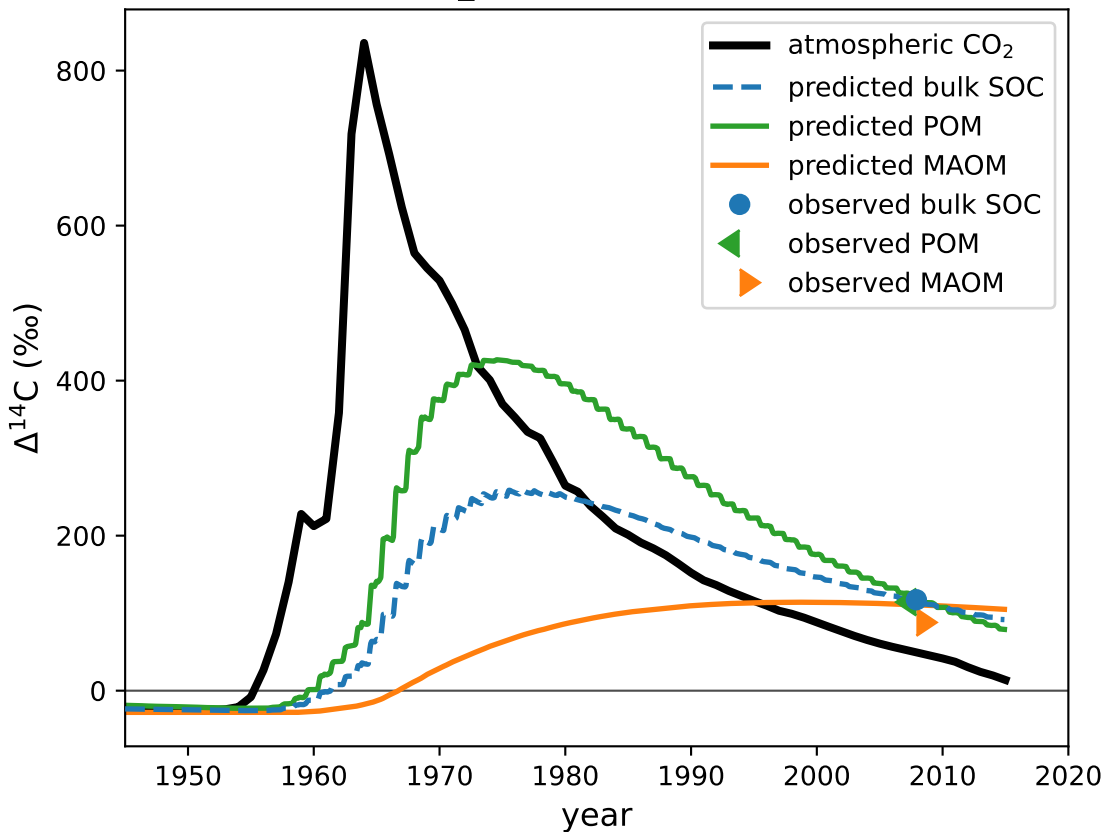

Supplement: Supplementary file 154 [file gmd-2023-242-supplement.zip]

SOMic

Lybrand\_2017, Catalina CZO ponderosa, ponderosa pine\_divergent

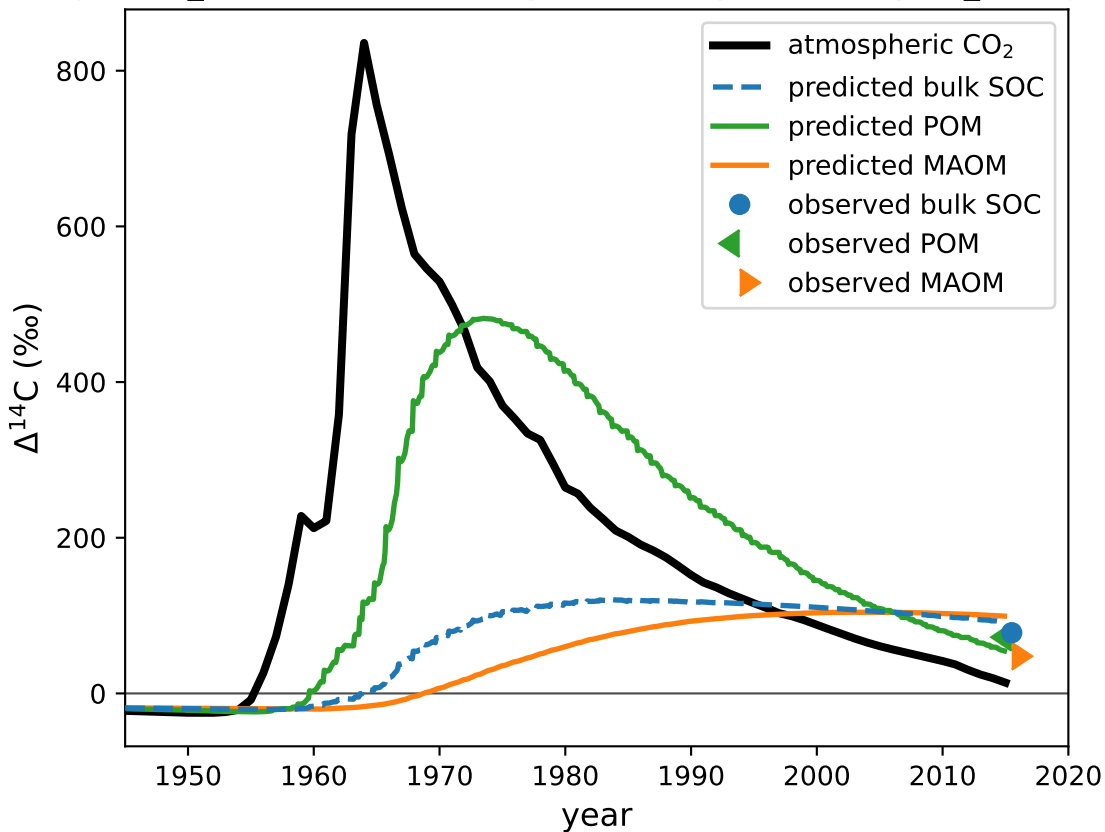

Supplement: Supplementary file 155 [file gmd-2023-242-supplement.zip]

SOMic  
Berhe\_2012, Tennessee Valley, plain comp

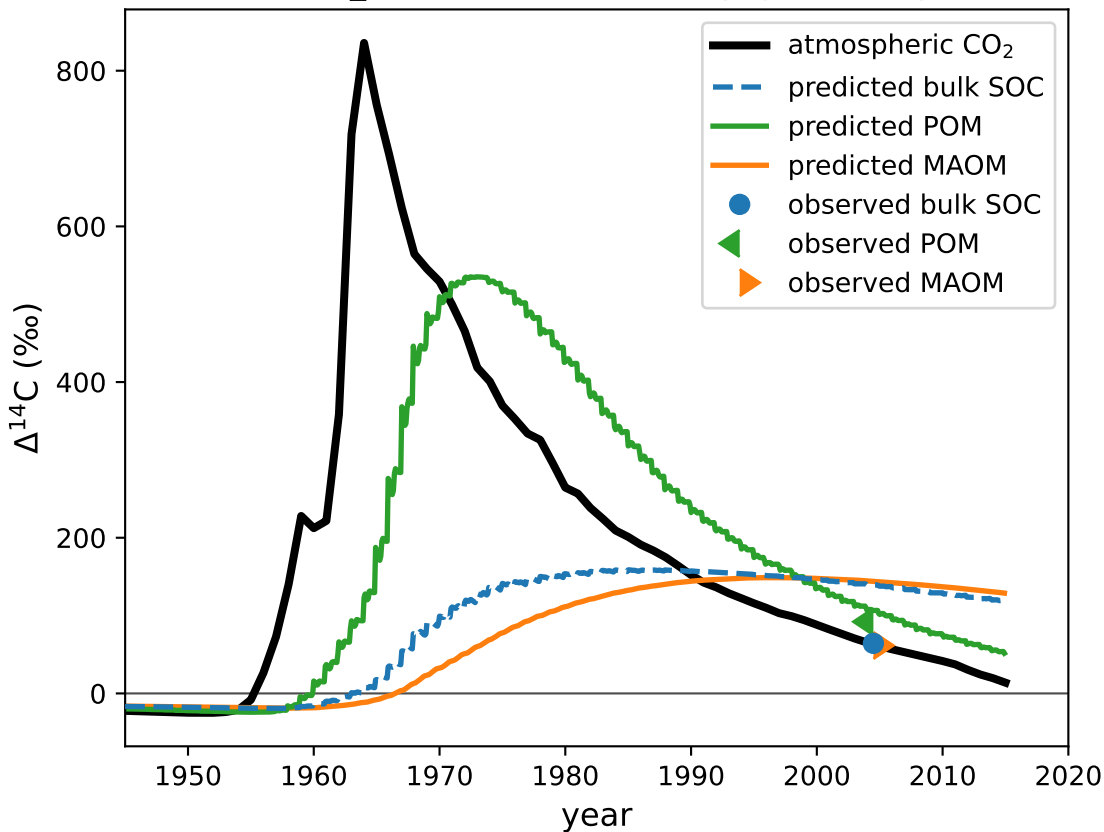

Supplement: Supplementary file 156 [file gmd-2023-242-supplement.zip]

MIMICS  
McFarlane\_2013, MA Harvard Forest, H5

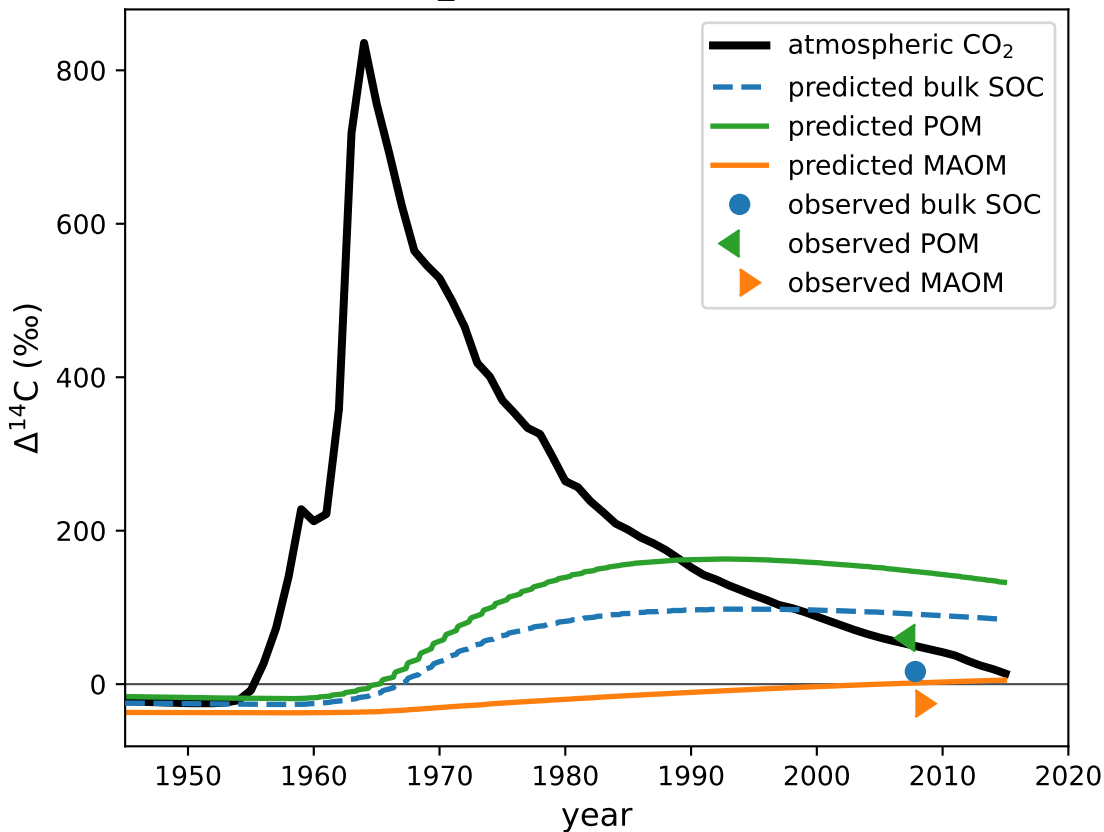

Supplement: Supplementary file 157 [file gmd-2023-242-supplement.zip]

SOMic  
Schrumpf\_2013, Hesse, Hesse.1

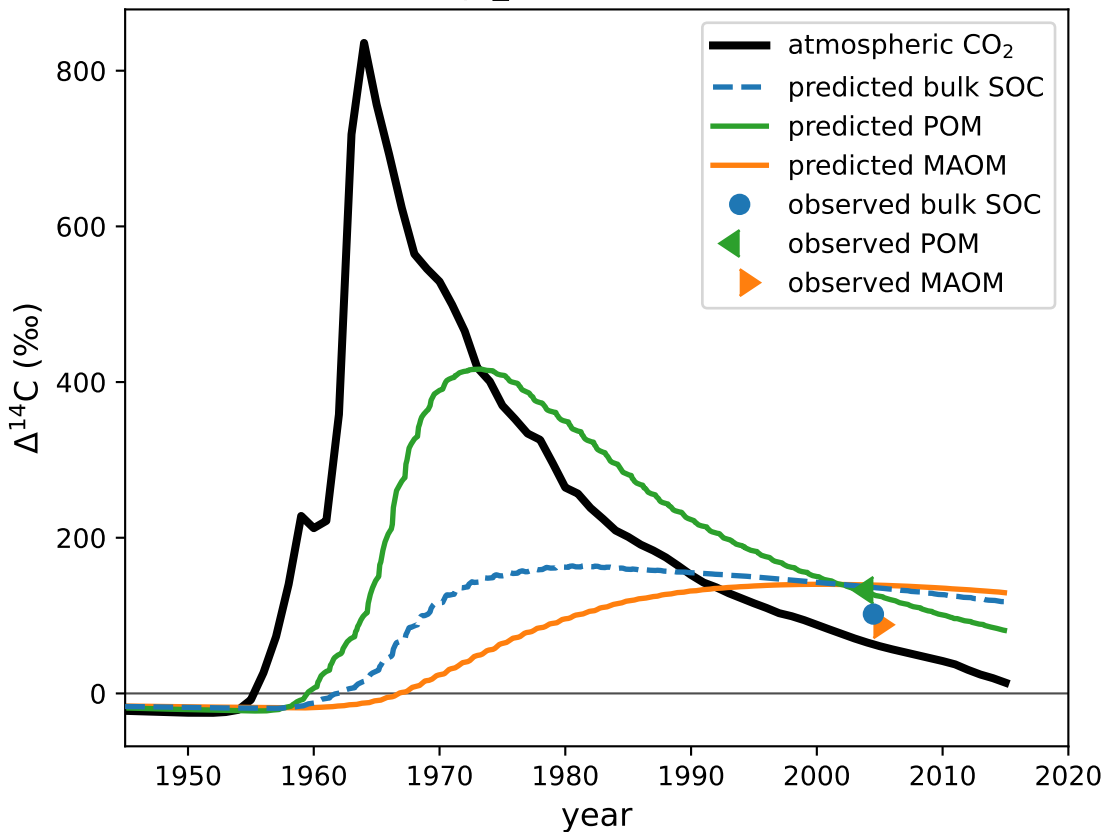

Supplement: Supplementary file 158 [file gmd-2023-242-supplement.zip]

MEND  
Schrumpf\_2013, Bugac, Bugac.1

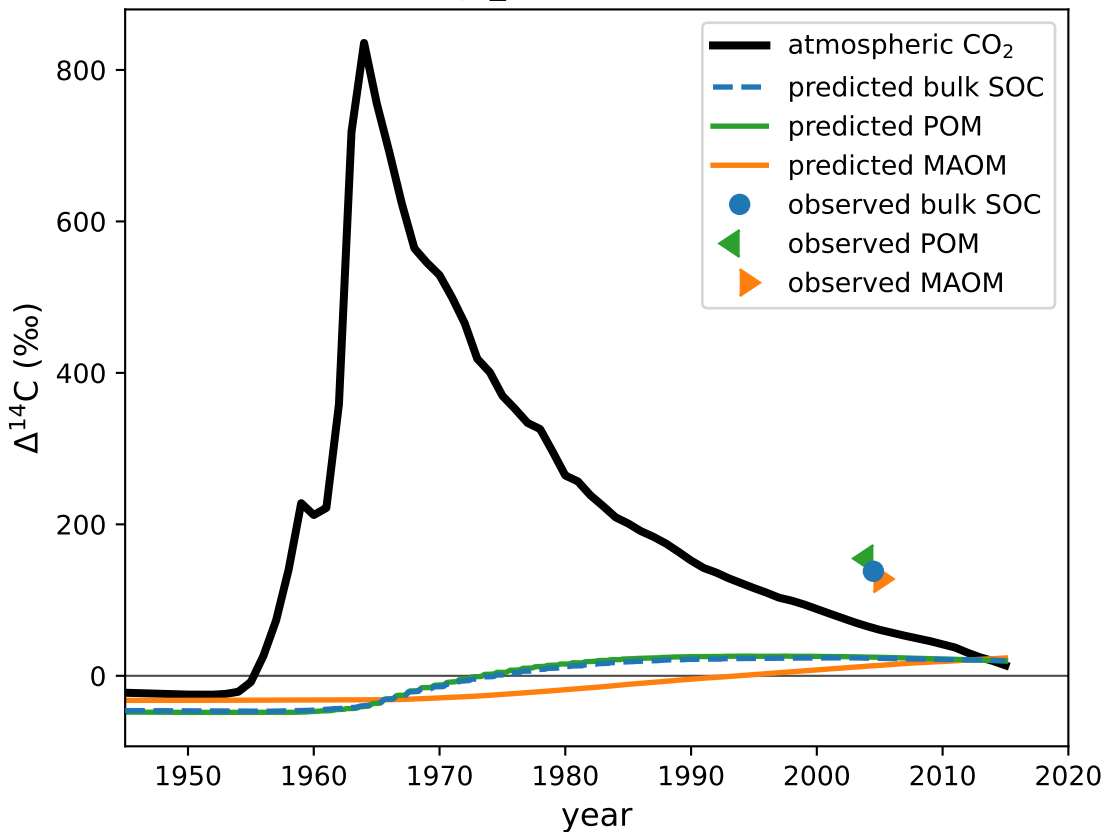

Supplement: Supplementary file 159 [file gmd-2023-242-supplement.zip]

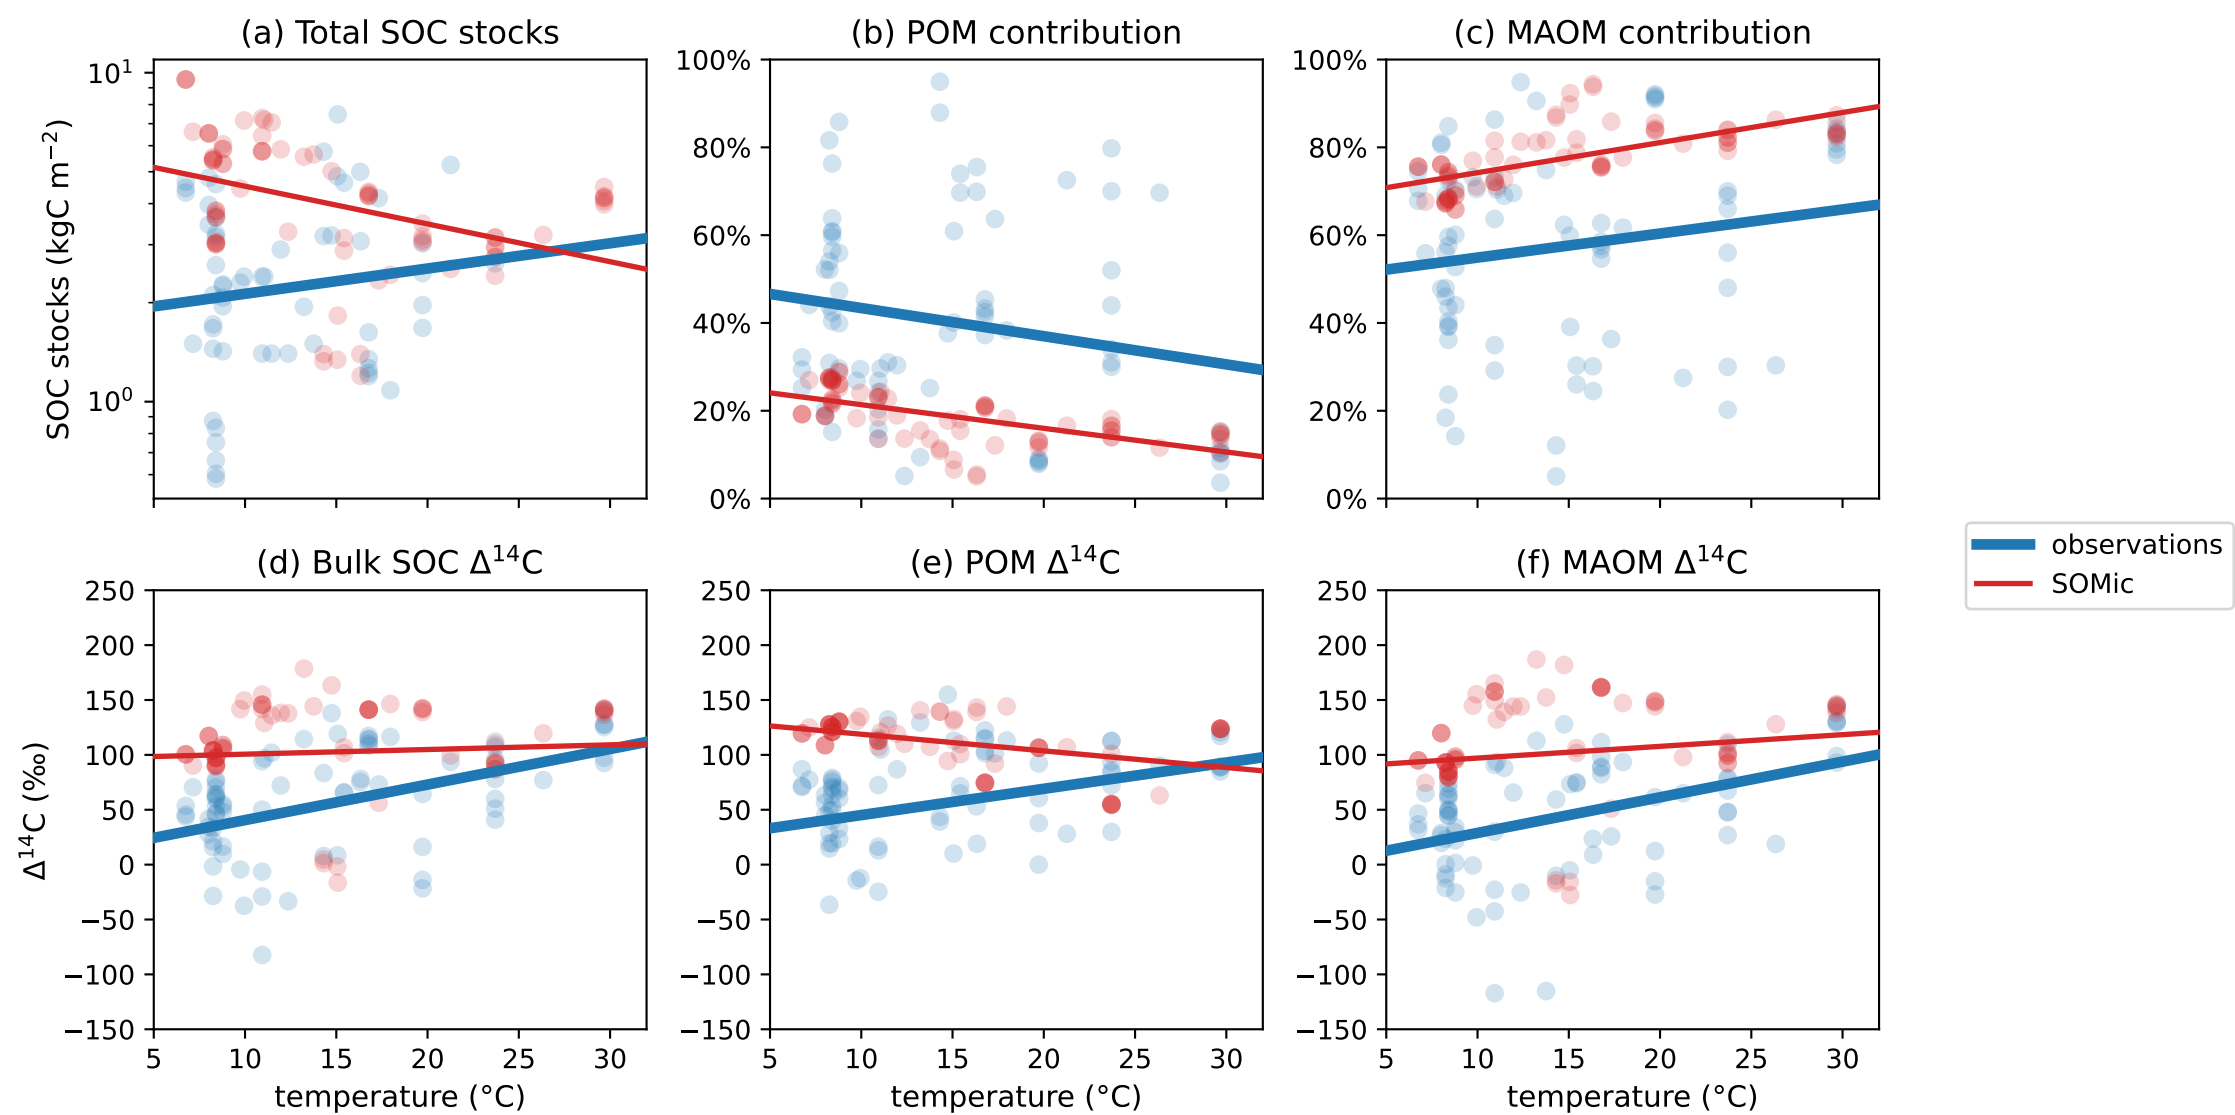

Supplement: Supplementary file 160 [file gmd-2023-242-supplement.zip]

Millennial  
McFarlane\_2013, NH Bartlett Forest, B4

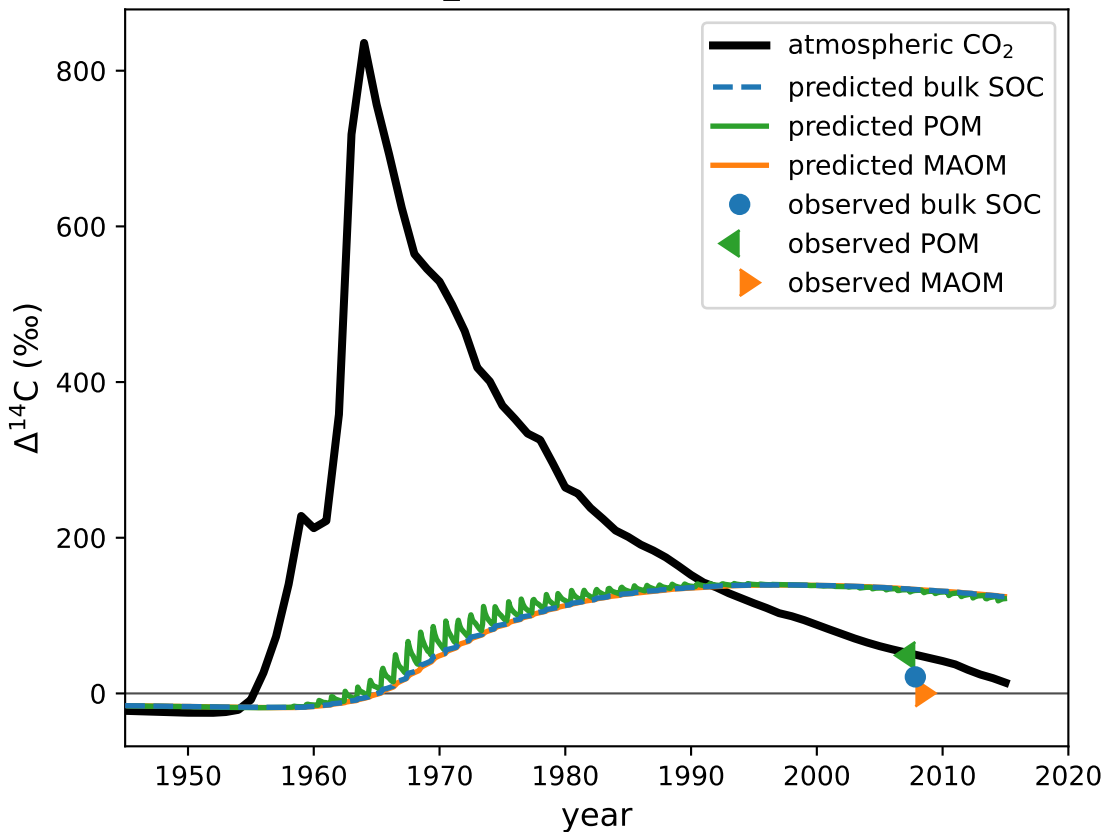

Supplement: Supplementary file 161 [file gmd-2023-242-supplement.zip]

MEND  
McFarlane\_2013, MO Ozark BREA, M1

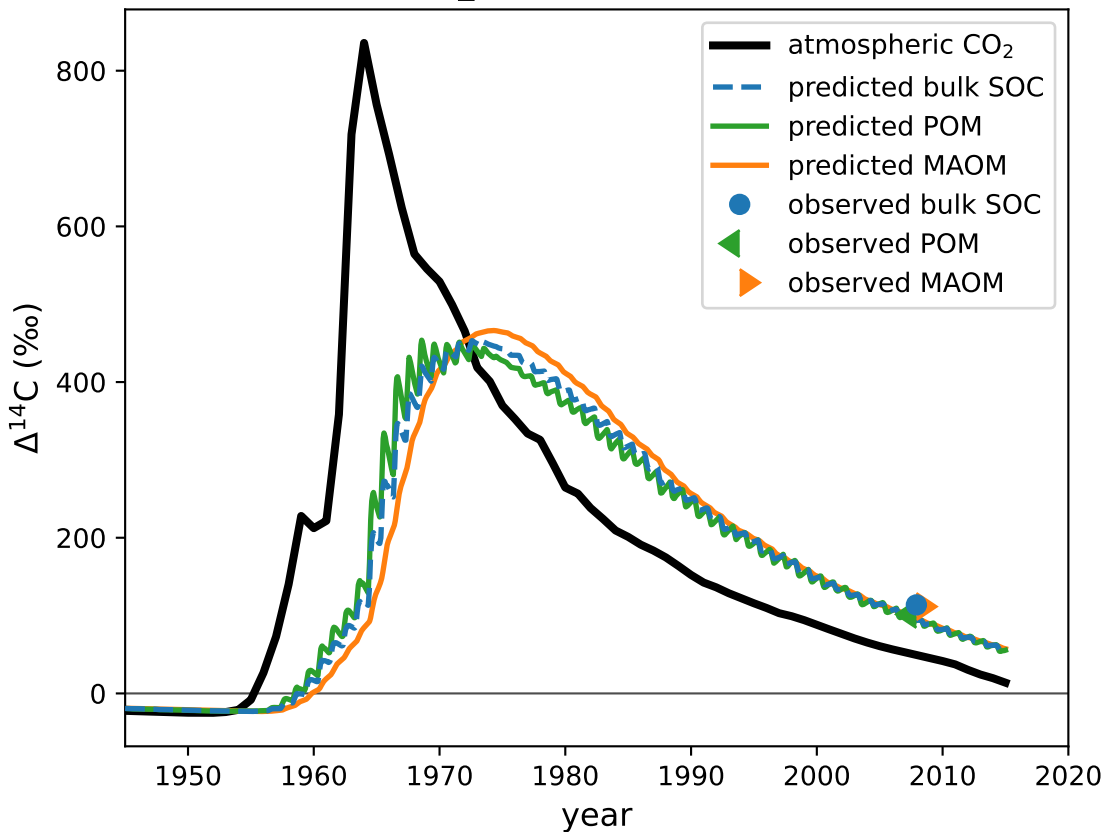

Supplement: Supplementary file 162 [file gmd-2023-242-supplement.zip]

CORPSE  
Schrumpf\_2013, Norunda, Norunda.1

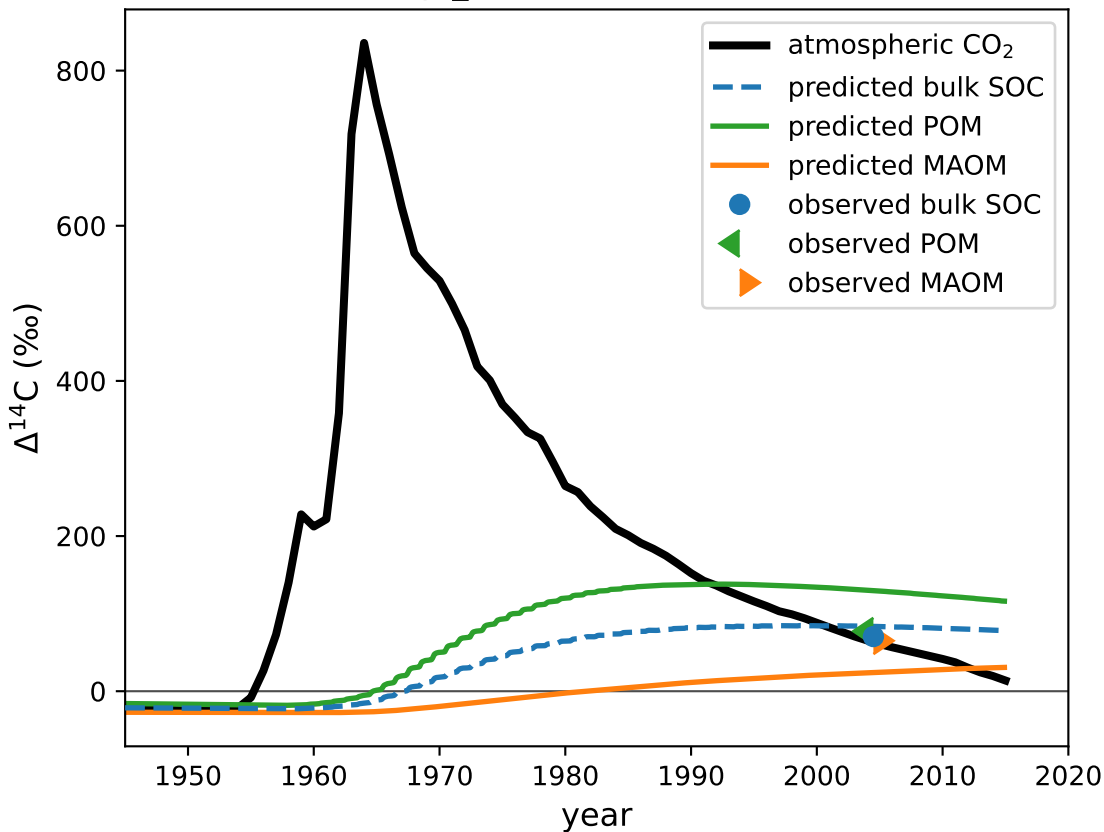

Supplement: Supplementary file 163 [file gmd-2023-242-supplement.zip]

MIMICS  
Marin-Spiotta\_2008, Sierra de Cayey, Active pastures

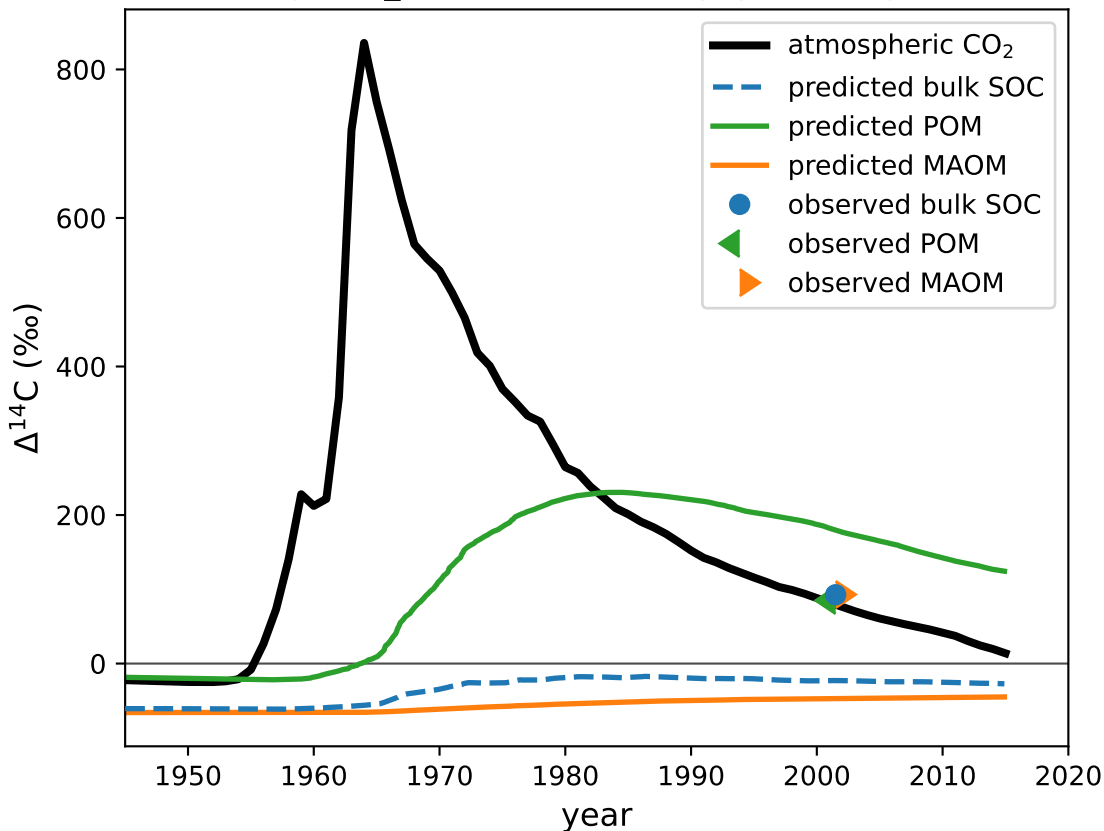

Supplement: Supplementary file 164 [file gmd-2023-242-supplement.zip]

CORPSE  
Schrumpf\_2013, Easter Bush, Easter Bush.1

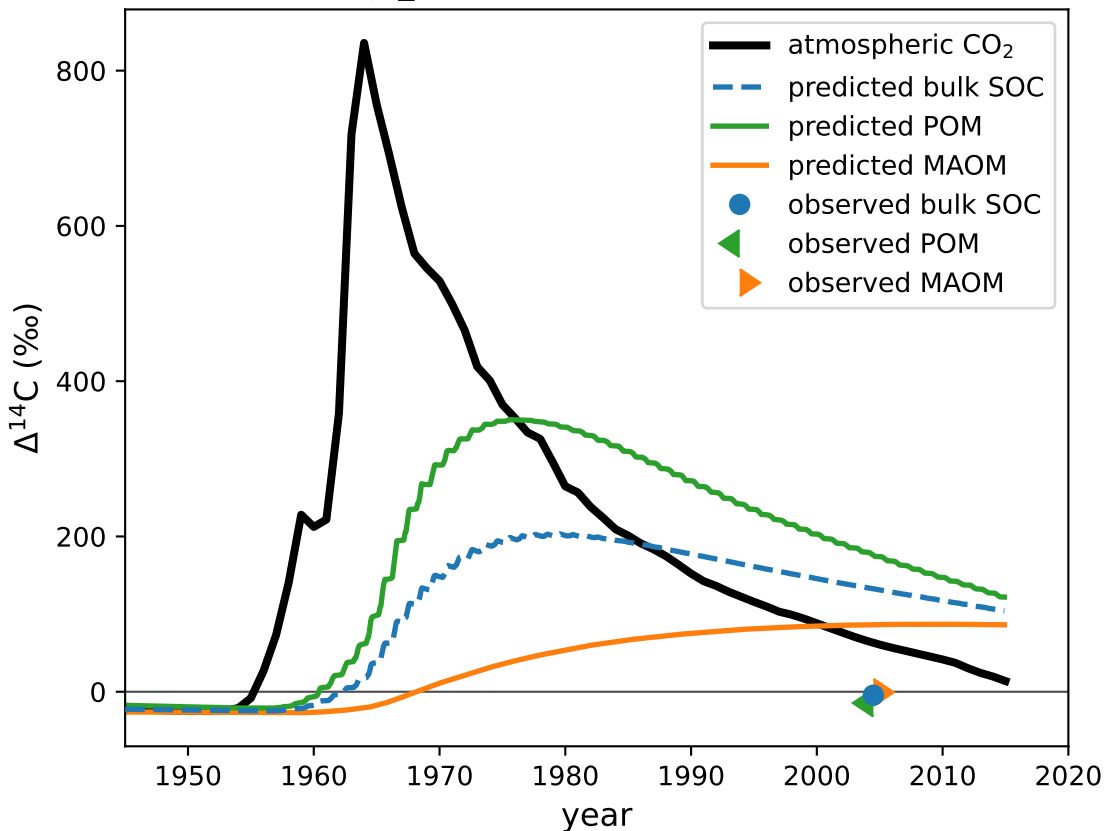

Supplement: Supplementary file 165 [file gmd-2023-242-supplement.zip]

CORPSE  
McFarlane\_2013, MO Ozark BREA, M1

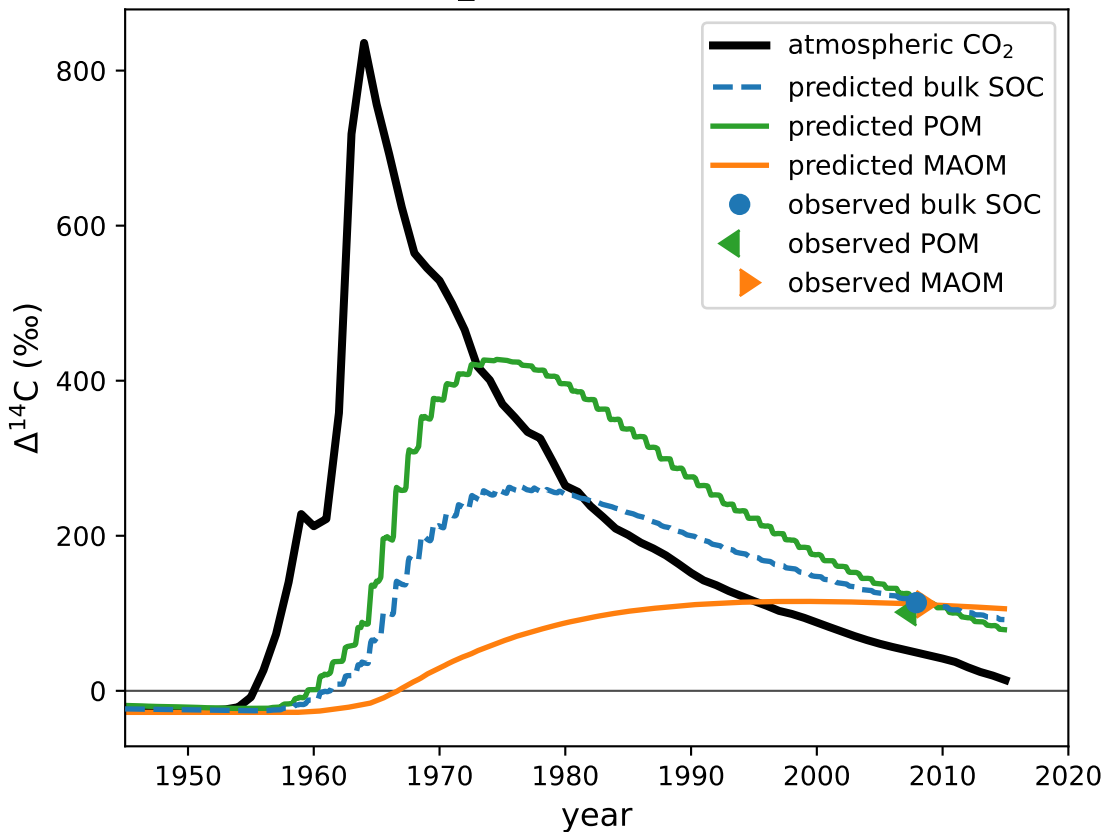

Supplement: Supplementary file 166 [file gmd-2023-242-supplement.zip]

CORPSE  
Heckman\_2010, Flagstaff Basalt, FGBA\_composite

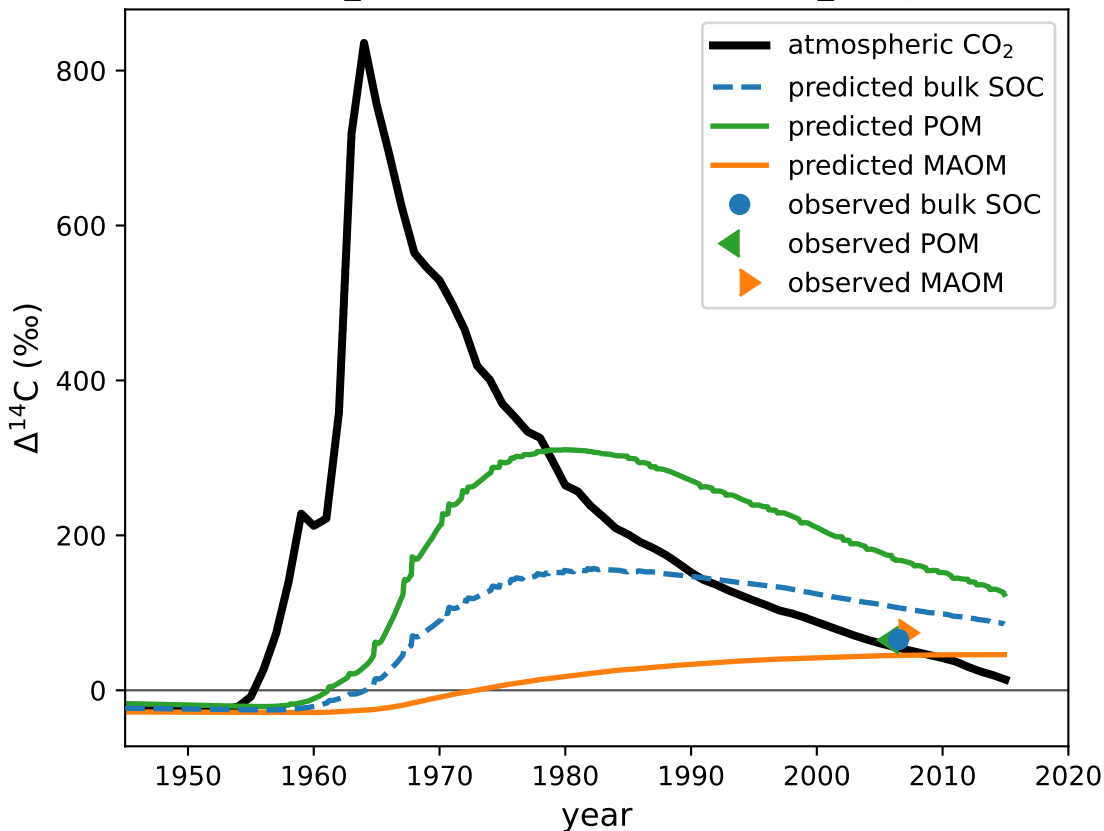

Supplement: Supplementary file 167 [file gmd-2023-242-supplement.zip]

CORPSE  
Lemke\_2006, Solling, Solling\_DO\_F1

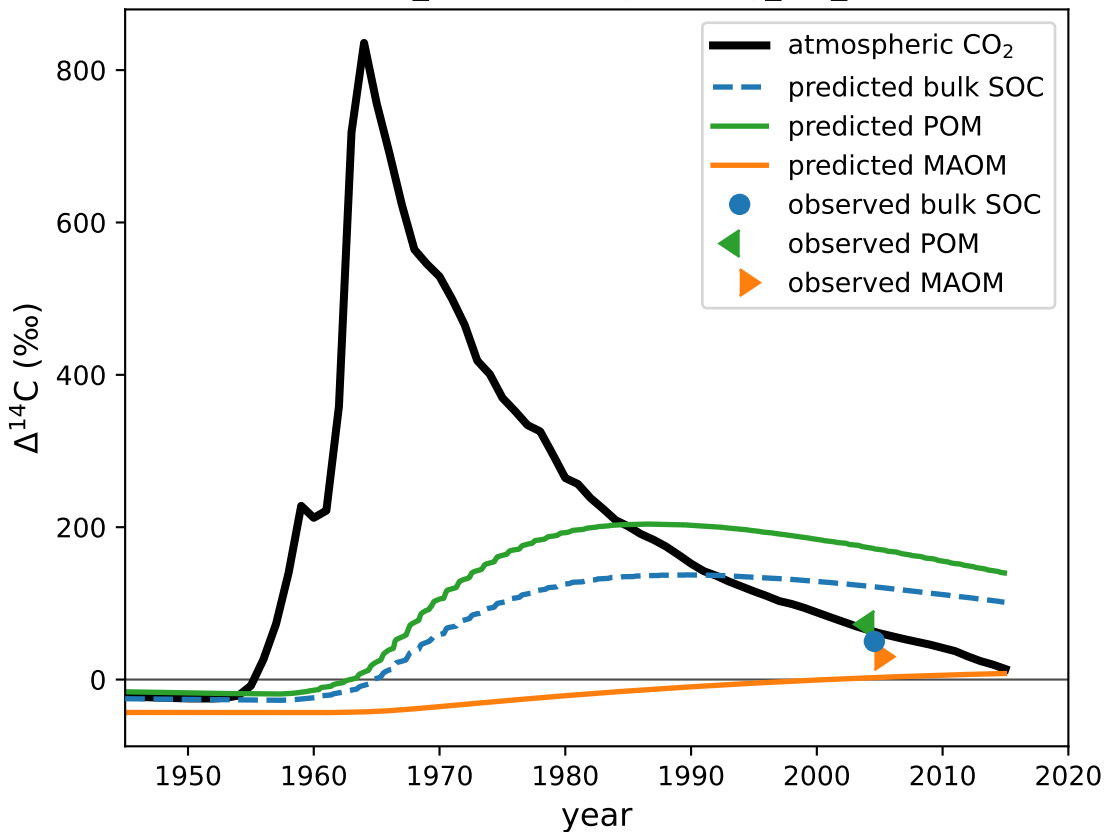

Supplement: Supplementary file 168 [file gmd-2023-242-supplement.zip]

MIMICS  
Marin-Spiotta\_2008, Sierra de Cayey, Primary forest

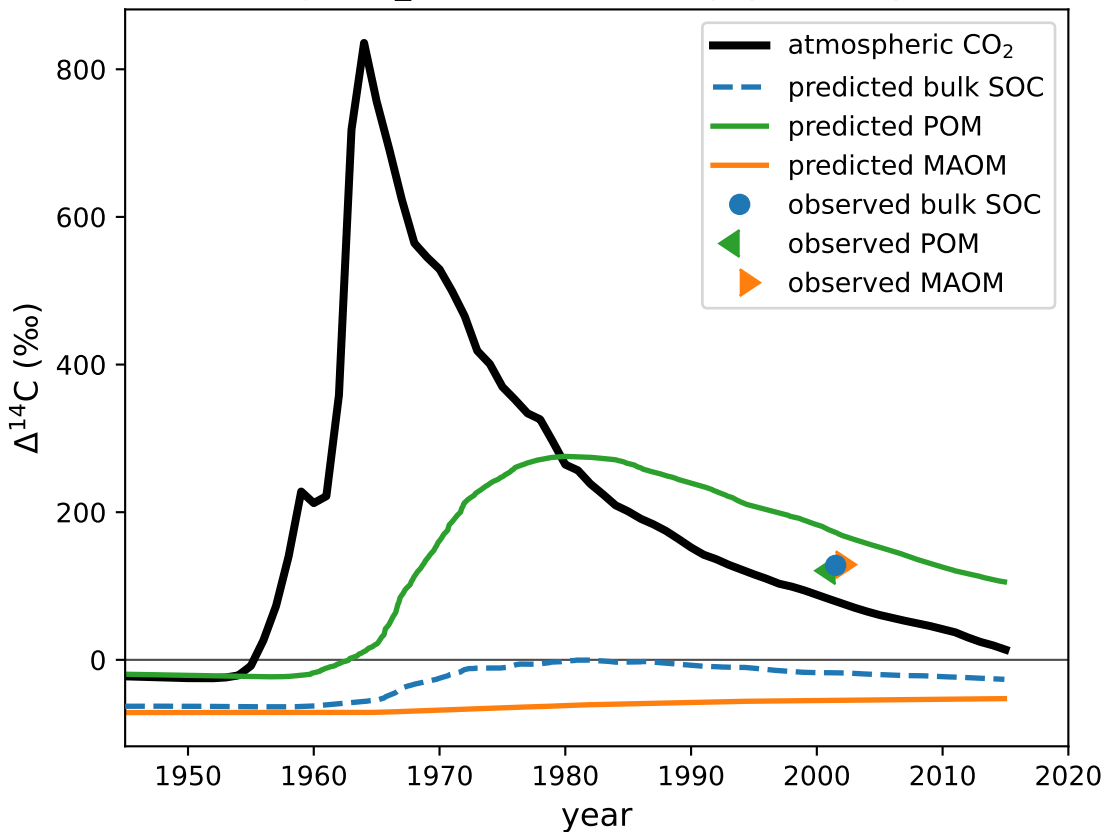

Supplement: Supplementary file 169 [file gmd-2023-242-supplement.zip]

CORPSE  
McFarlane\_2013, MA Harvard Forest, H2

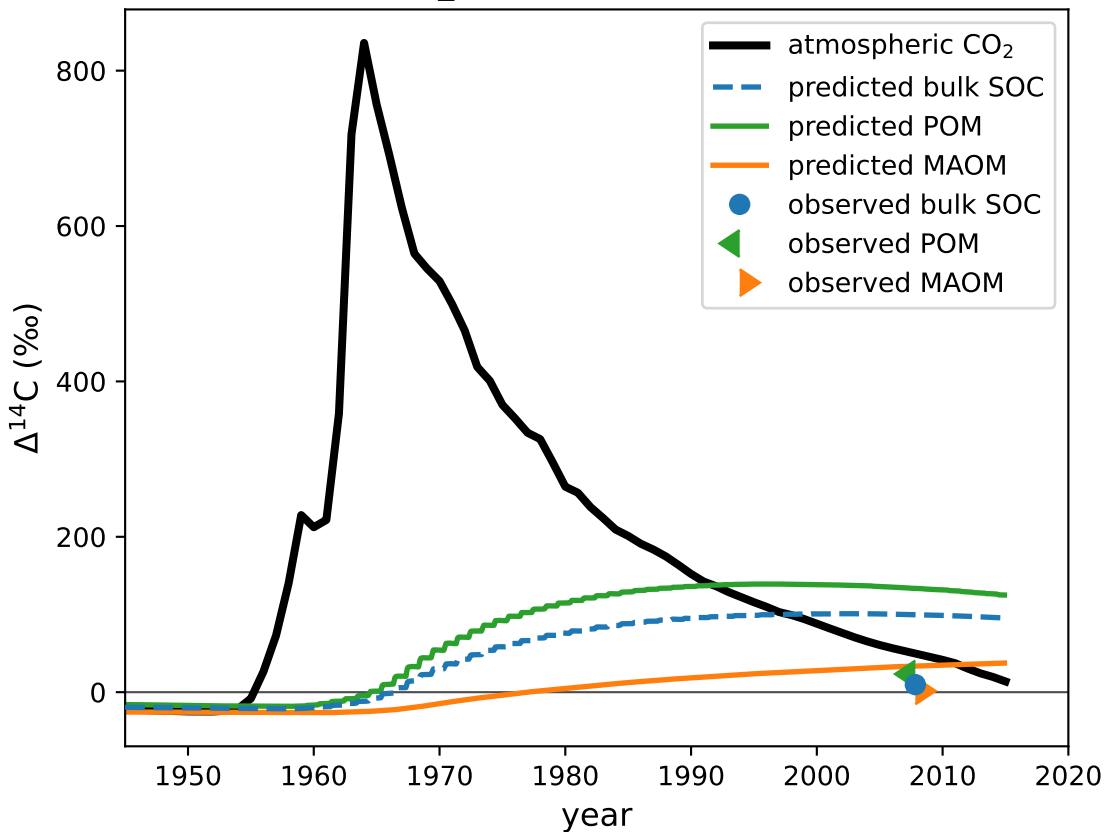

Supplement: Supplementary file 170 [file gmd-2023-242-supplement.zip]

Millennial  
Lemke\_2006, Solling, Solling\_DO\_F2

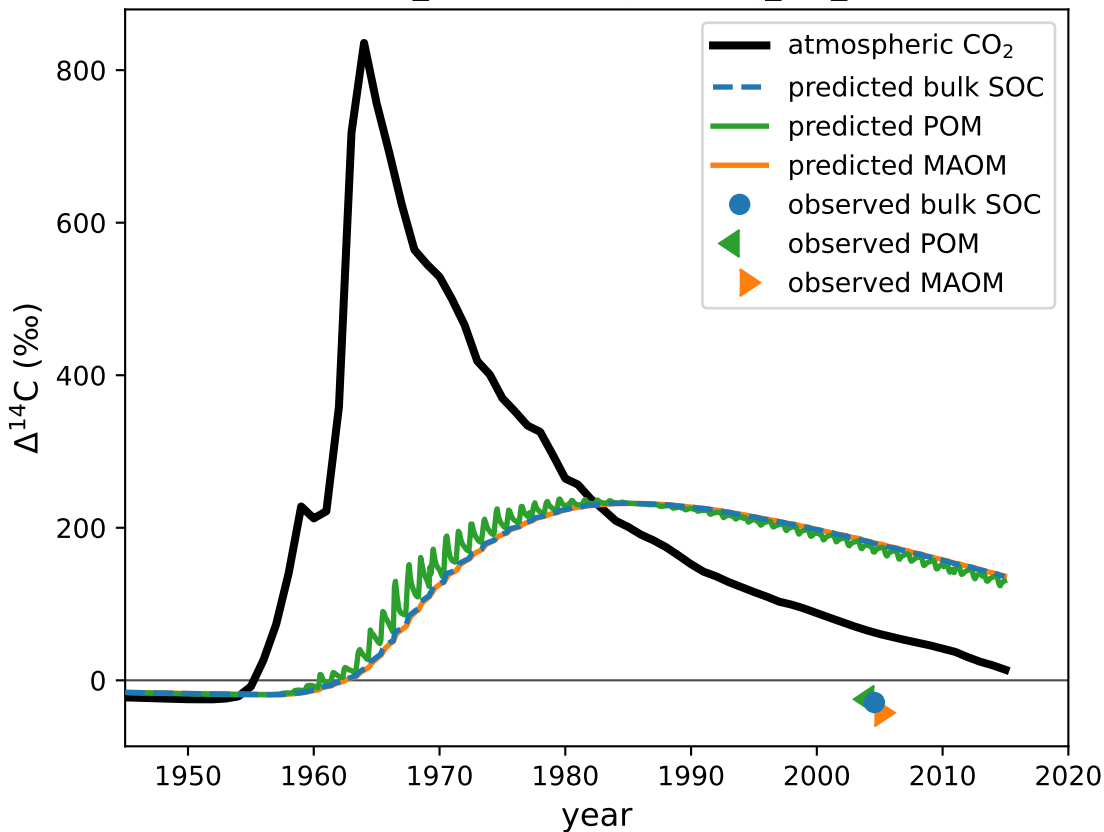

Supplement: Supplementary file 171 [file gmd-2023-242-supplement.zip]

Millennial  
Schrumpf\_2013, Laqueuille, Laqueuille.1

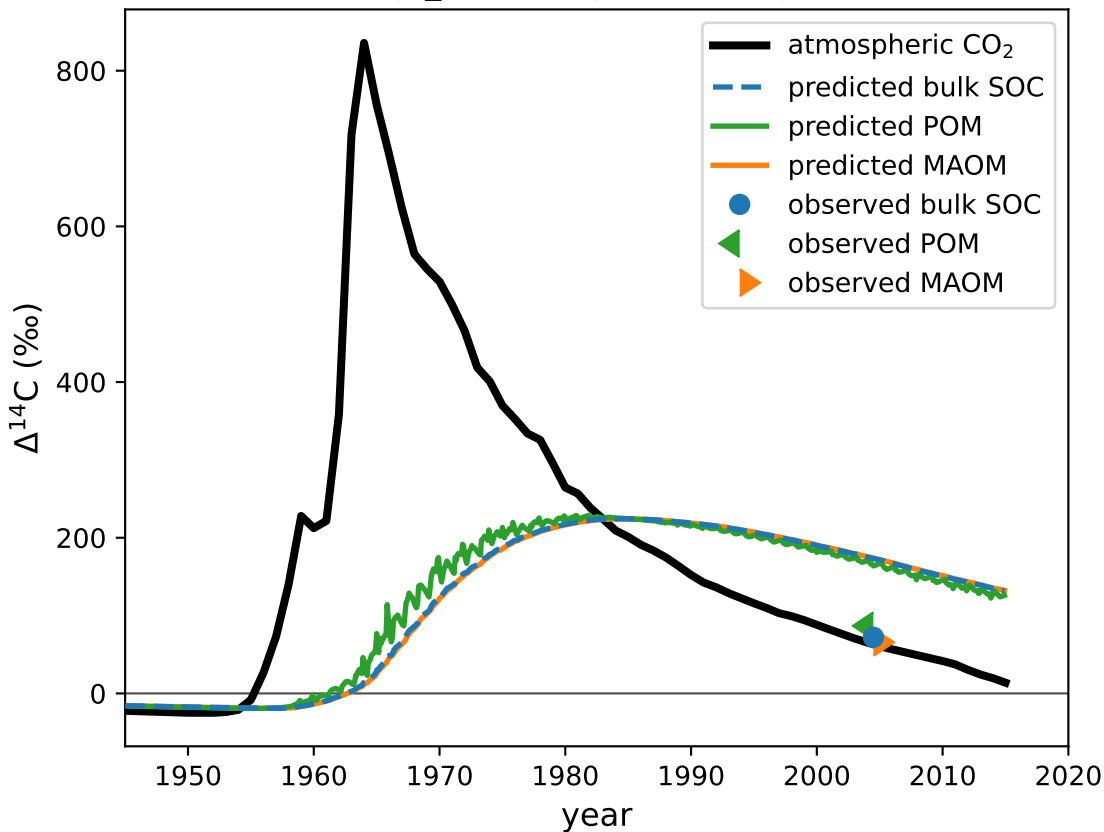

Supplement: Supplementary file 172 [file gmd-2023-242-supplement.zip]

Millennial  
Rasmussen\_2018, GRwf, GRwf

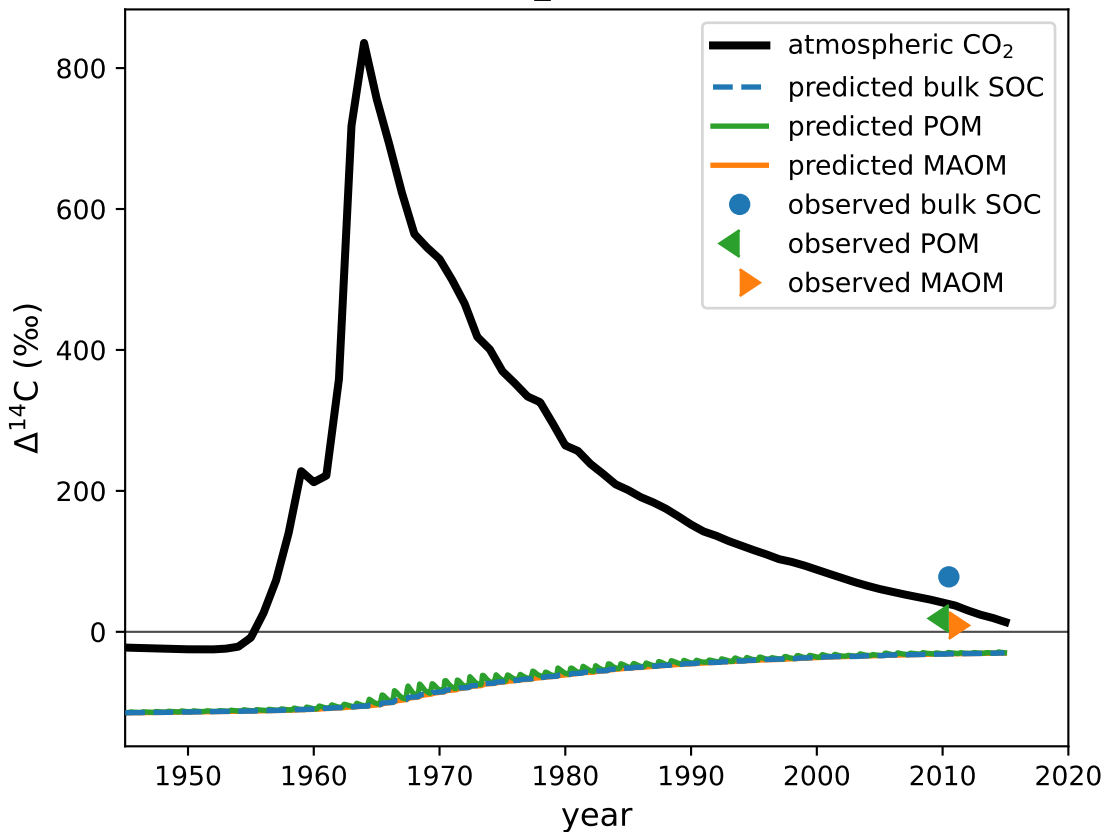

Supplement: Supplementary file 173 [file gmd-2023-242-supplement.zip]

SOMic  
Schrumppf\_2013, Wetzstein, Wetzstein.1

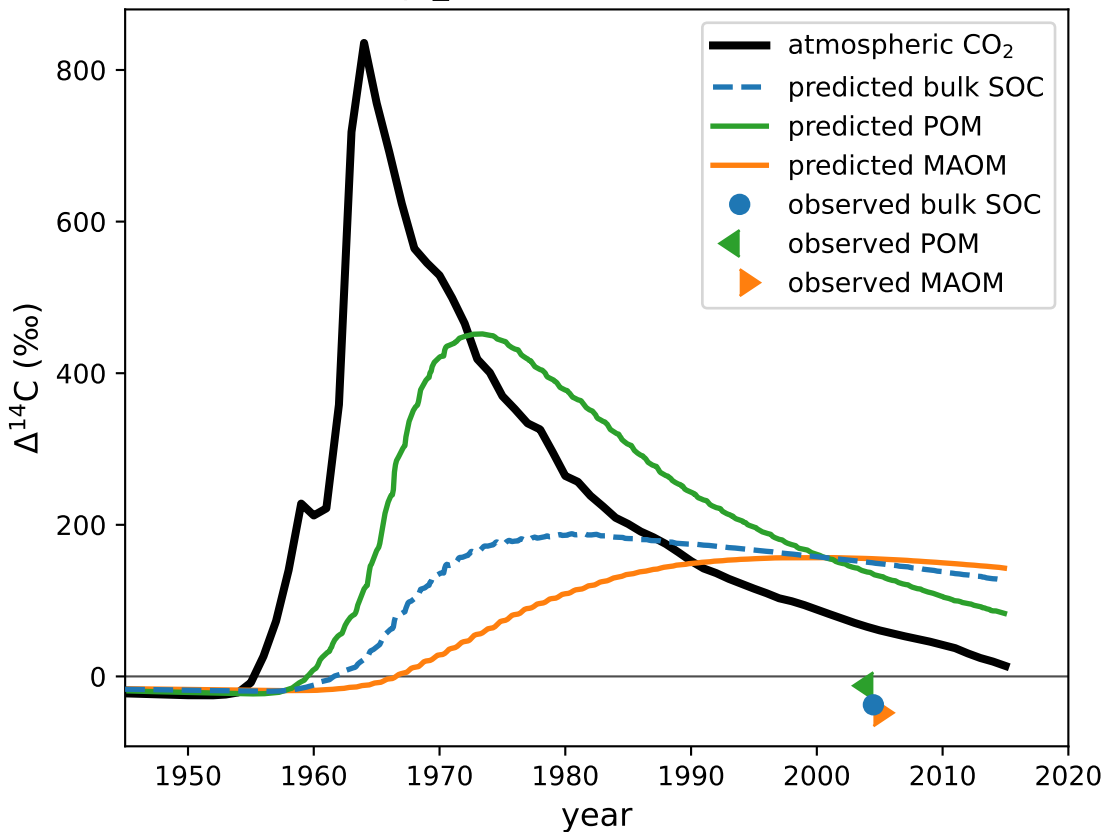

Supplement: Supplementary file 174 [file gmd-2023-242-supplement.zip]

SOMic  
Berhe\_2012, Tennessee Valley, slope comp

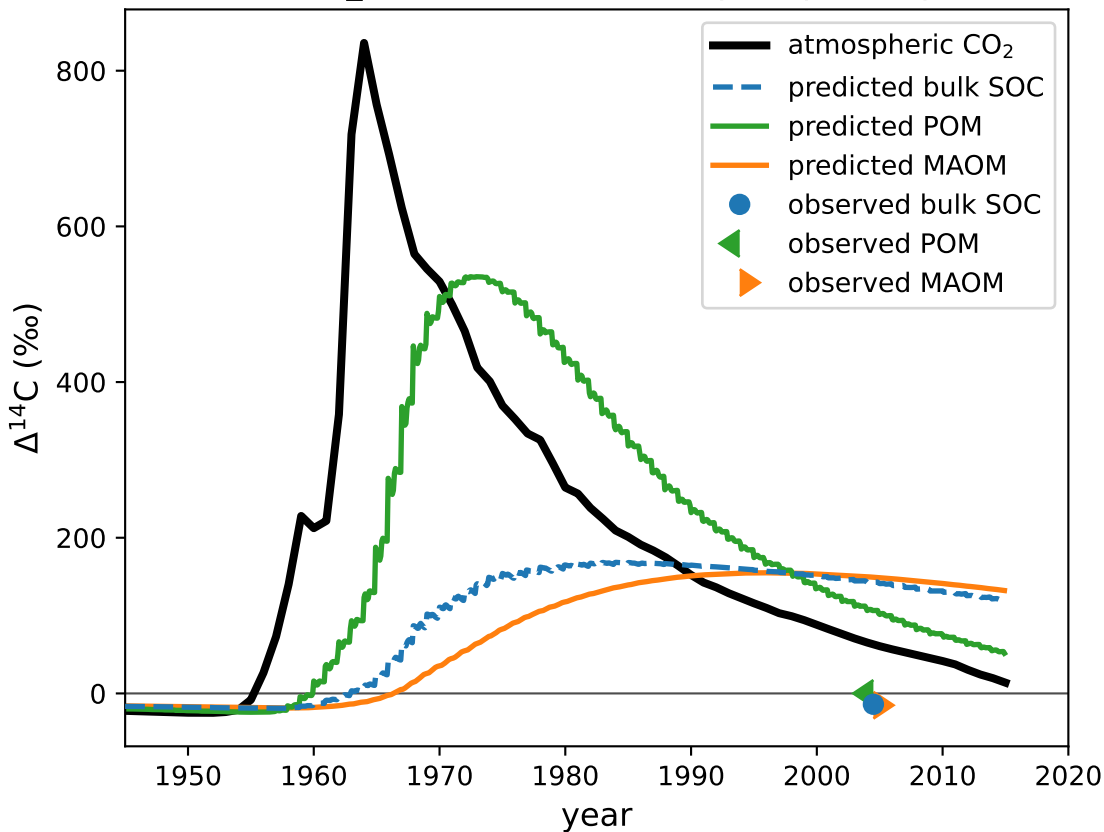

Supplement: Supplementary file 175 [file gmd-2023-242-supplement.zip]

MEND  
McFarlane\_2013, MA Harvard Forest, H2

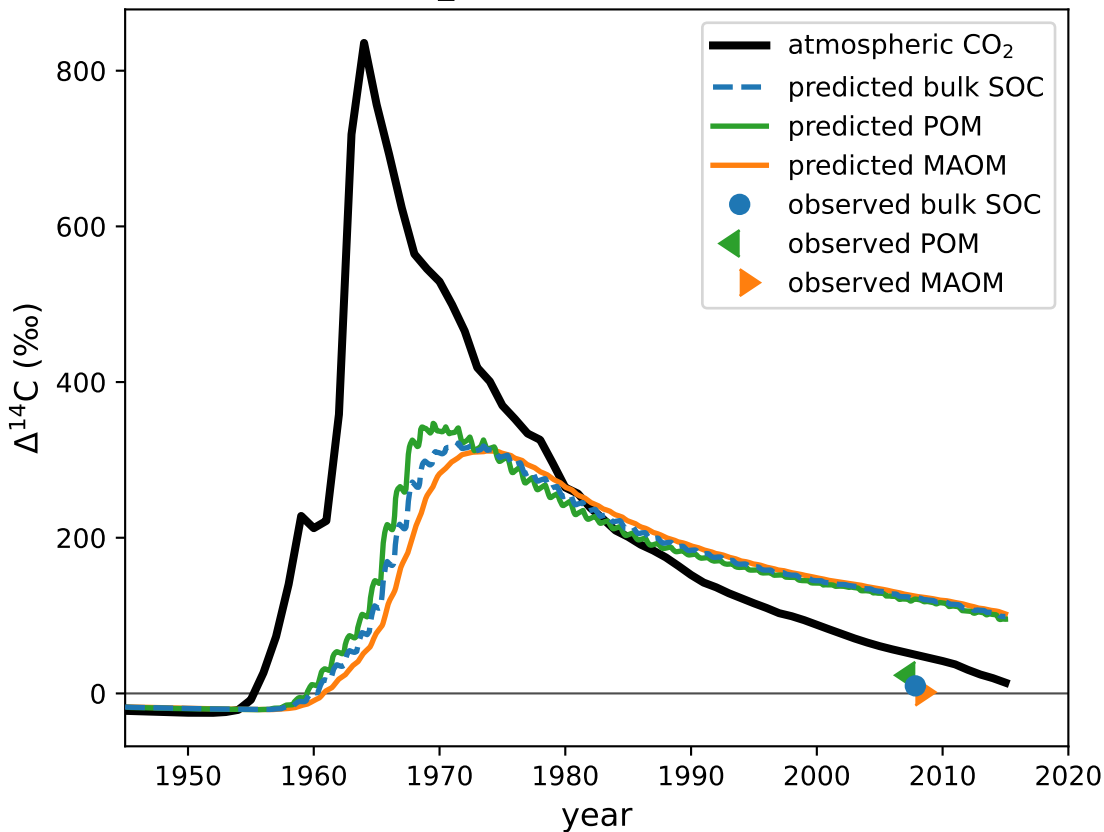

Supplement: Supplementary file 176 [file gmd-2023-242-supplement.zip]

MEND  
Marin-Spiotta\_2008, Sierra de Cayey, Primary forest

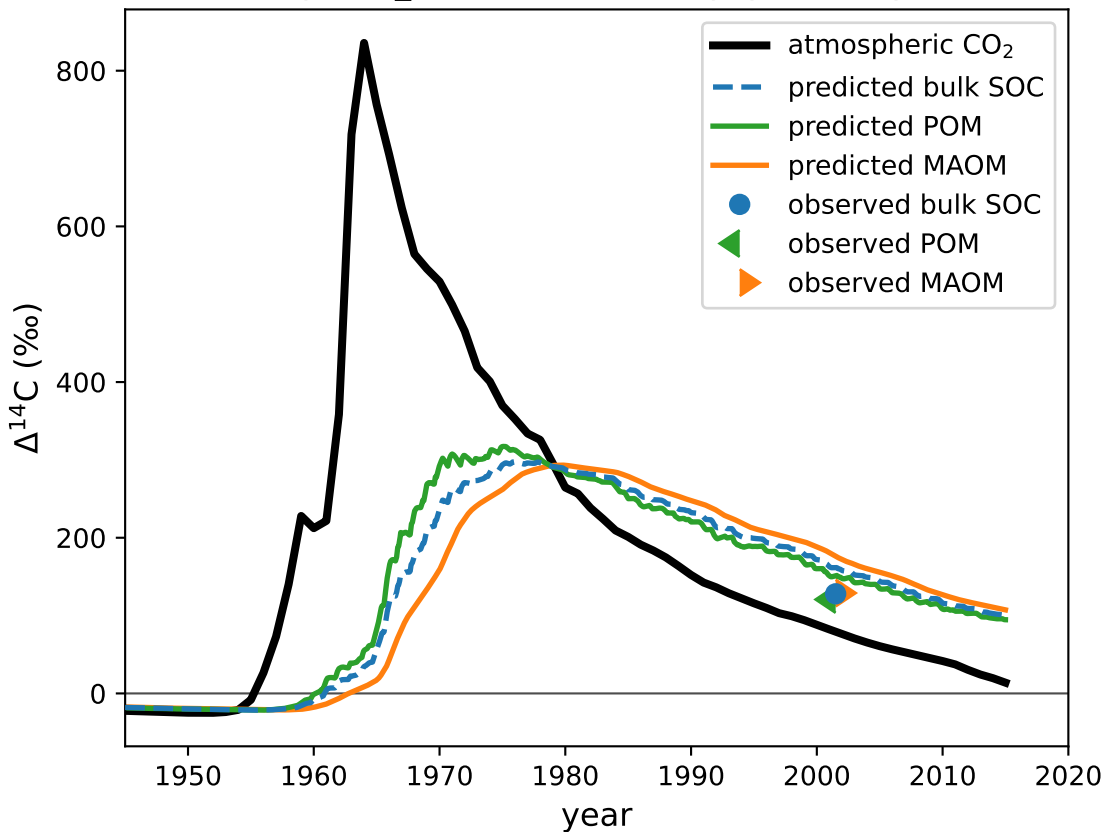

Supplement: Supplementary file 177 [file gmd-2023-242-supplement.zip]

MIMICS  
Berhe\_2012, Tennessee Valley, summit comp

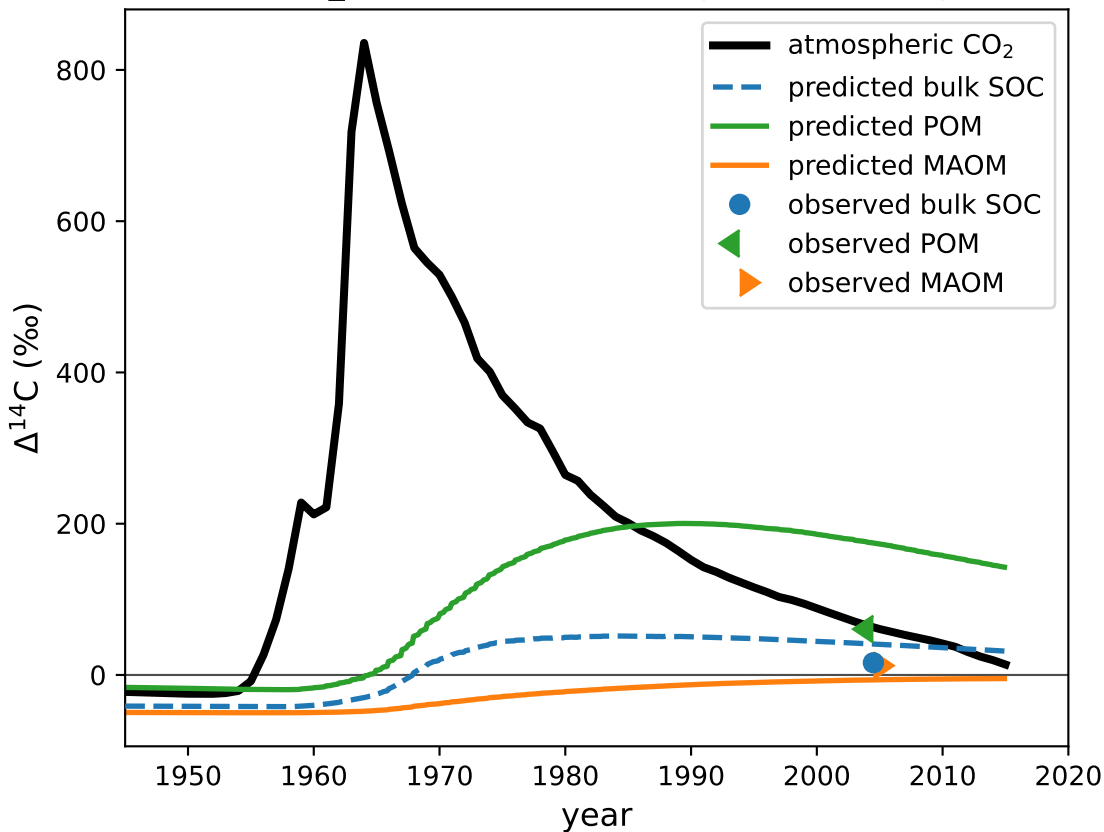

Supplement: Supplementary file 178 [file gmd-2023-242-supplement.zip]

MIMICS  
Schrumpf\_2013, Carlow, Carlow.1

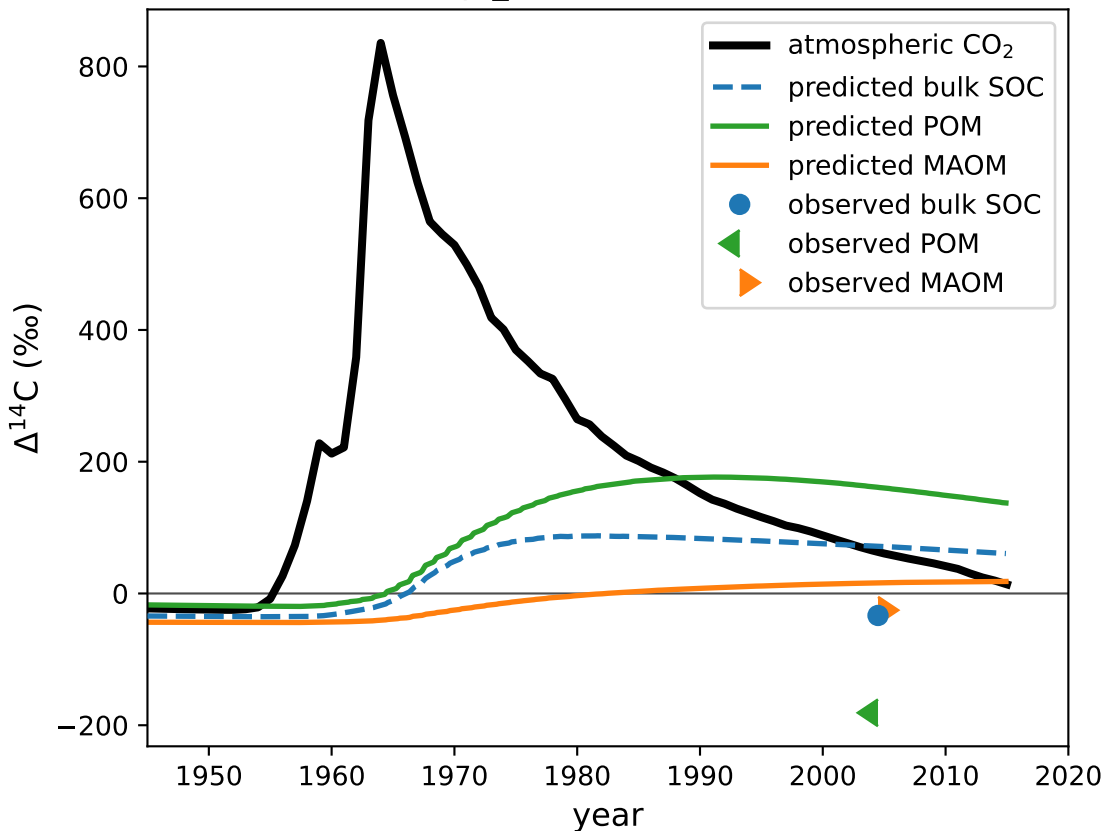

Supplement: Supplementary file 179 [file gmd-2023-242-supplement.zip]

Millennial  
Lybrand\_2017, Catalina CZO conifer, mixed conifer\_divergent

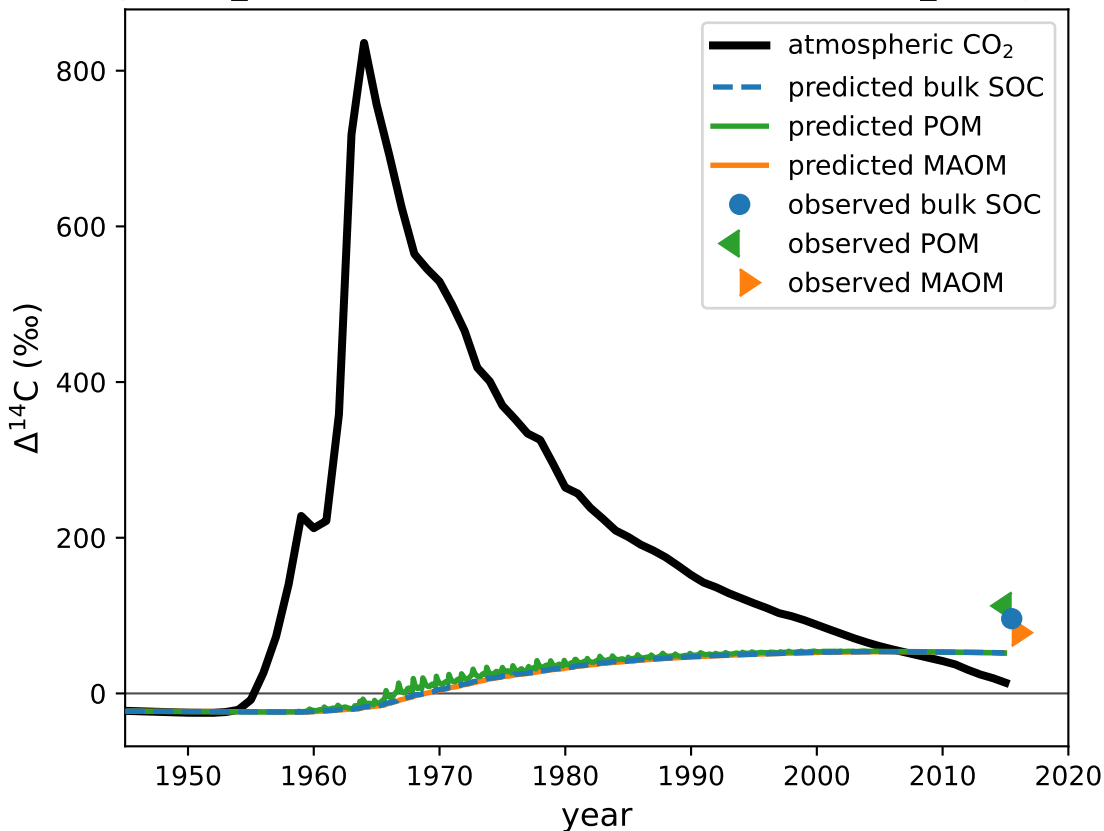

Supplement: Supplementary file 180 [file gmd-2023-242-supplement.zip]

CORPSE  
Meyer\_2012, Stubai, Meadow

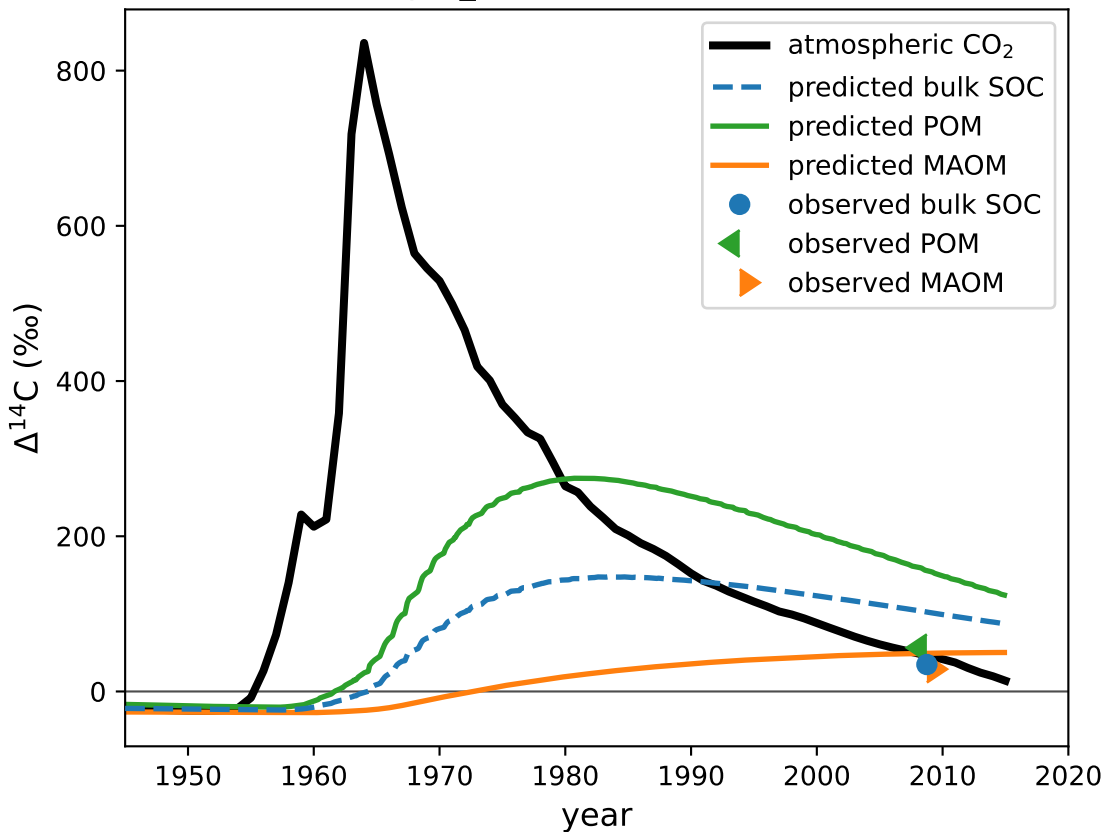

Supplement: Supplementary file 181 [file gmd-2023-242-supplement.zip]

CORPSE  
Berhe\_2012, Tennessee Valley, hollow comp

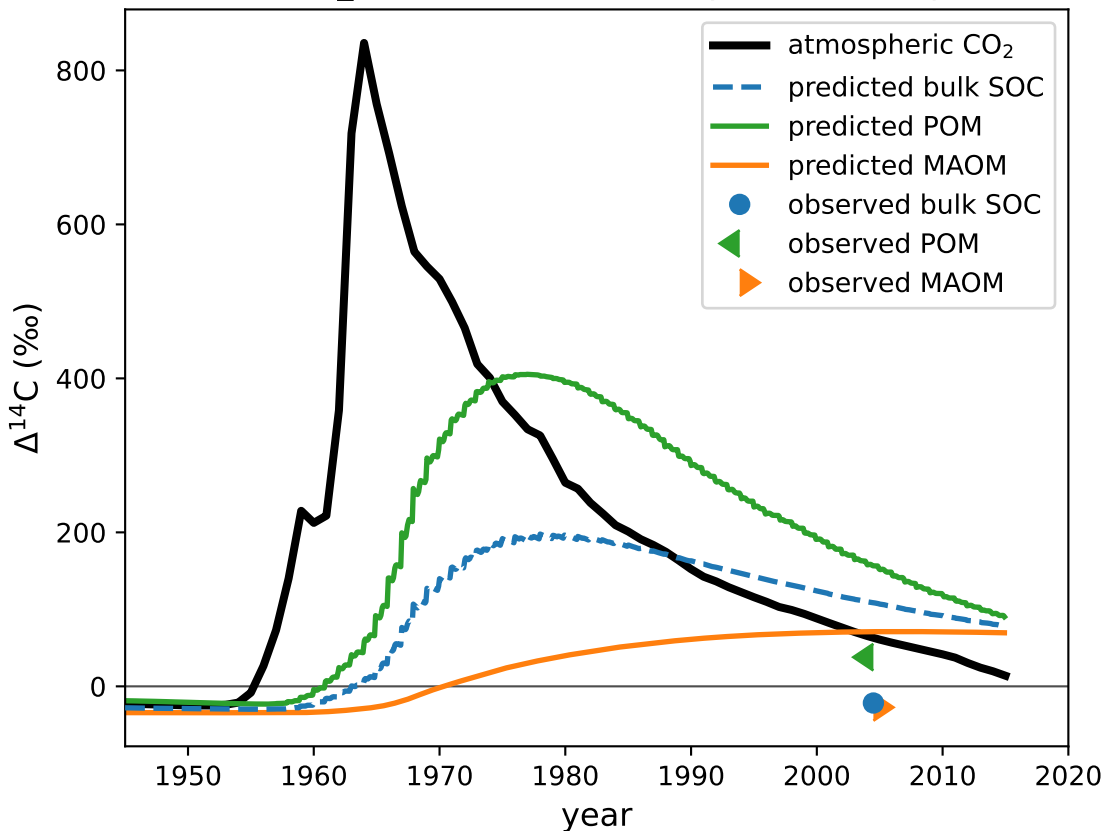

Supplement: Supplementary file 182 [file gmd-2023-242-supplement.zip]

MEND  
McFarlane\_2013, Mi-Fine Colonial Point, C2

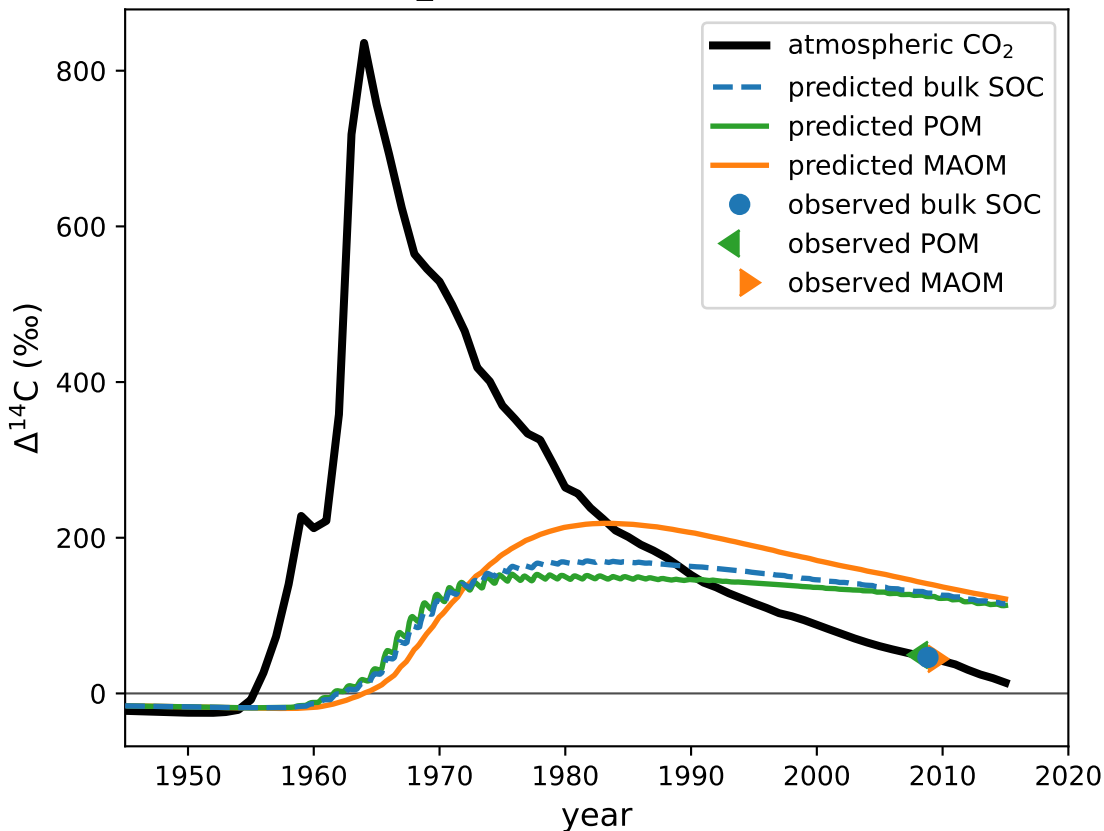

Supplement: Supplementary file 183 [file gmd-2023-242-supplement.zip]

Millennial  
McFarlane\_2013, Mi-Fine Colonial Point, C4

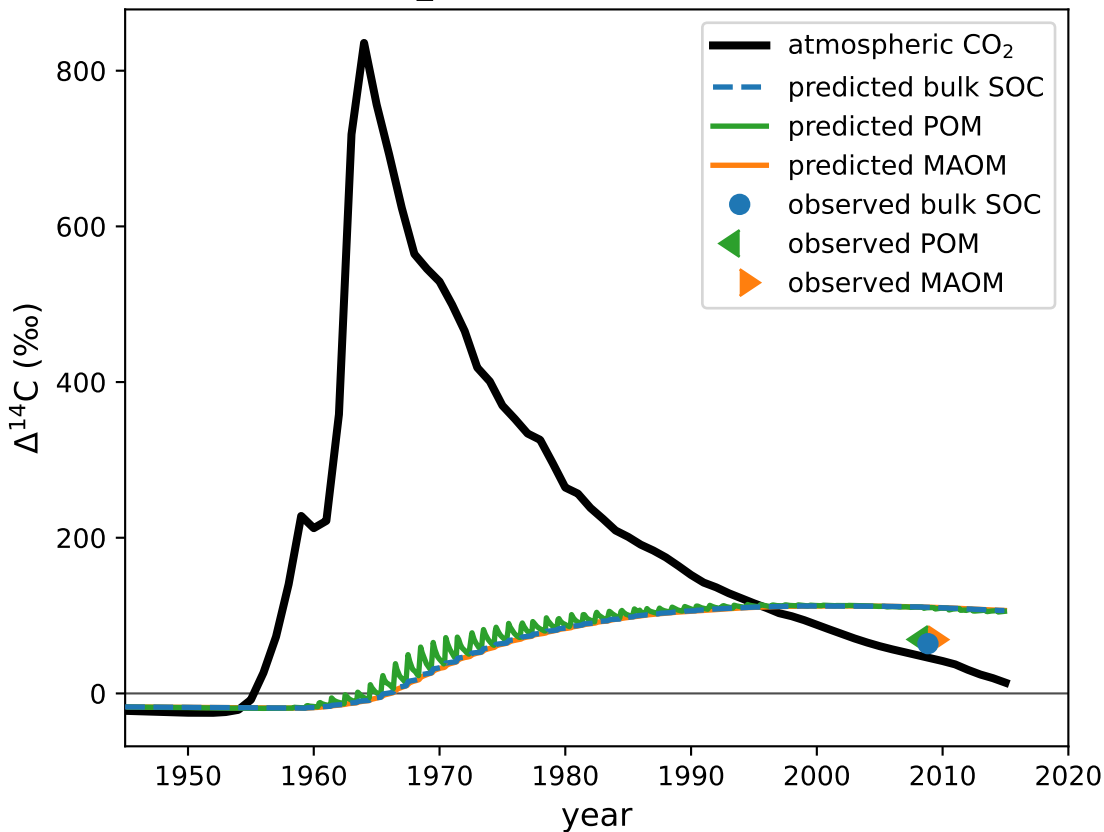

Supplement: Supplementary file 184 [file gmd-2023-242-supplement.zip]

# MIMICS

Lybrand\_2017, Catalina CZO ponderosa, ponderosa pine\_divergent

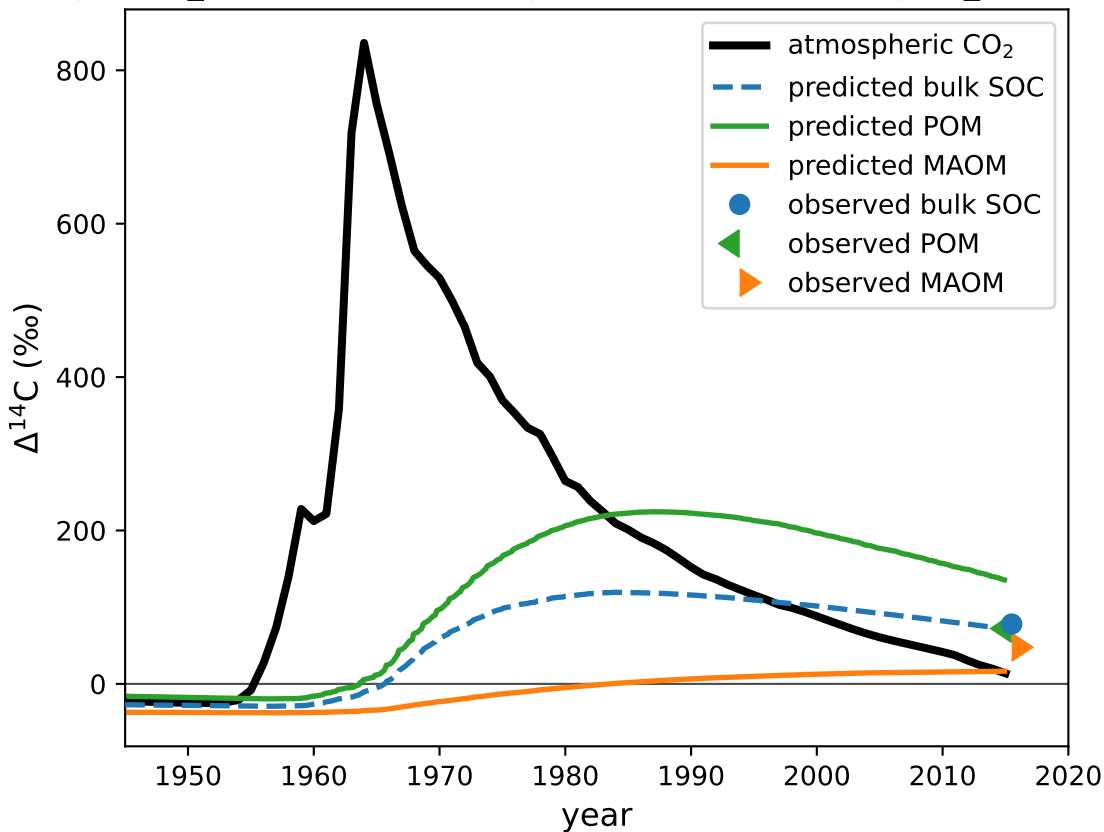

Supplement: Supplementary file 185 [file gmd-2023-242-supplement.zip]

SOMic  
Heckman\_2010, Mt. Lemmon Granite, MLGR\_composite

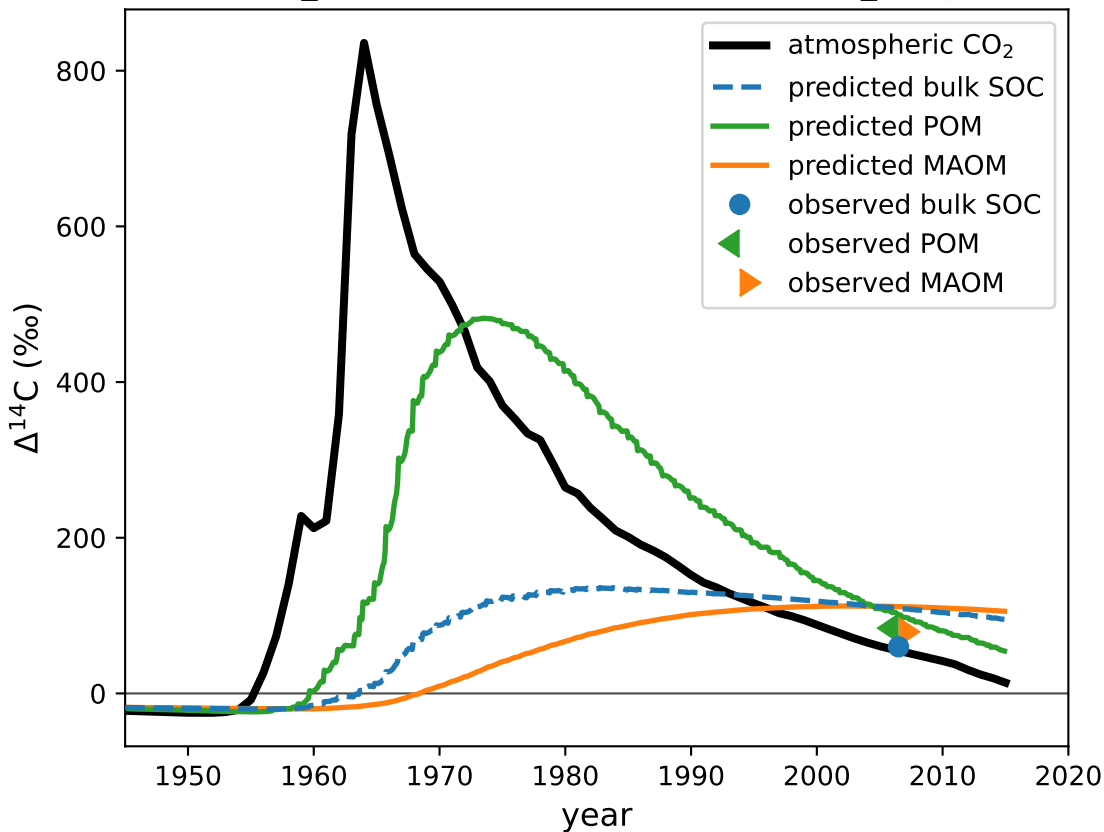

Supplement: Supplementary file 186 [file gmd-2023-242-supplement.zip]

SOMic  
Rasmussen\_2018, BSpp, BSpp

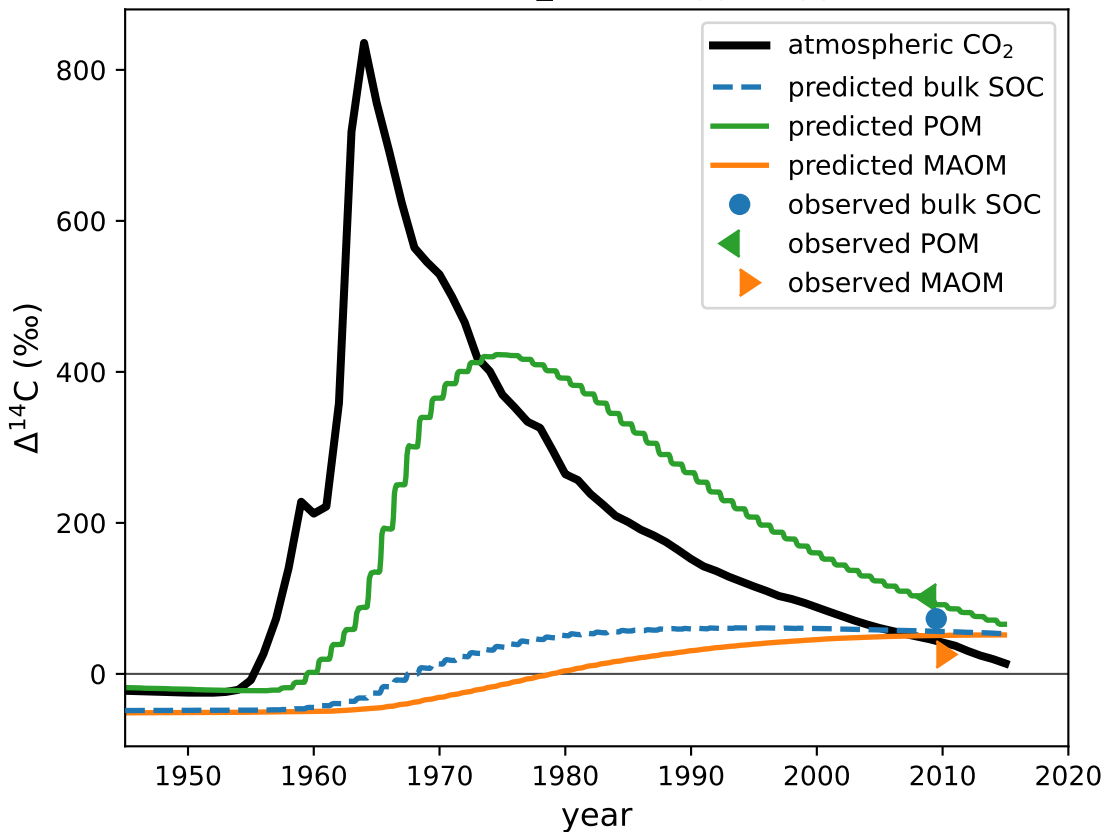

Supplement: Supplementary file 187 [file gmd-2023-242-supplement.zip]

SOMic  
Rasmussen\_2018, BSwf, BSwf

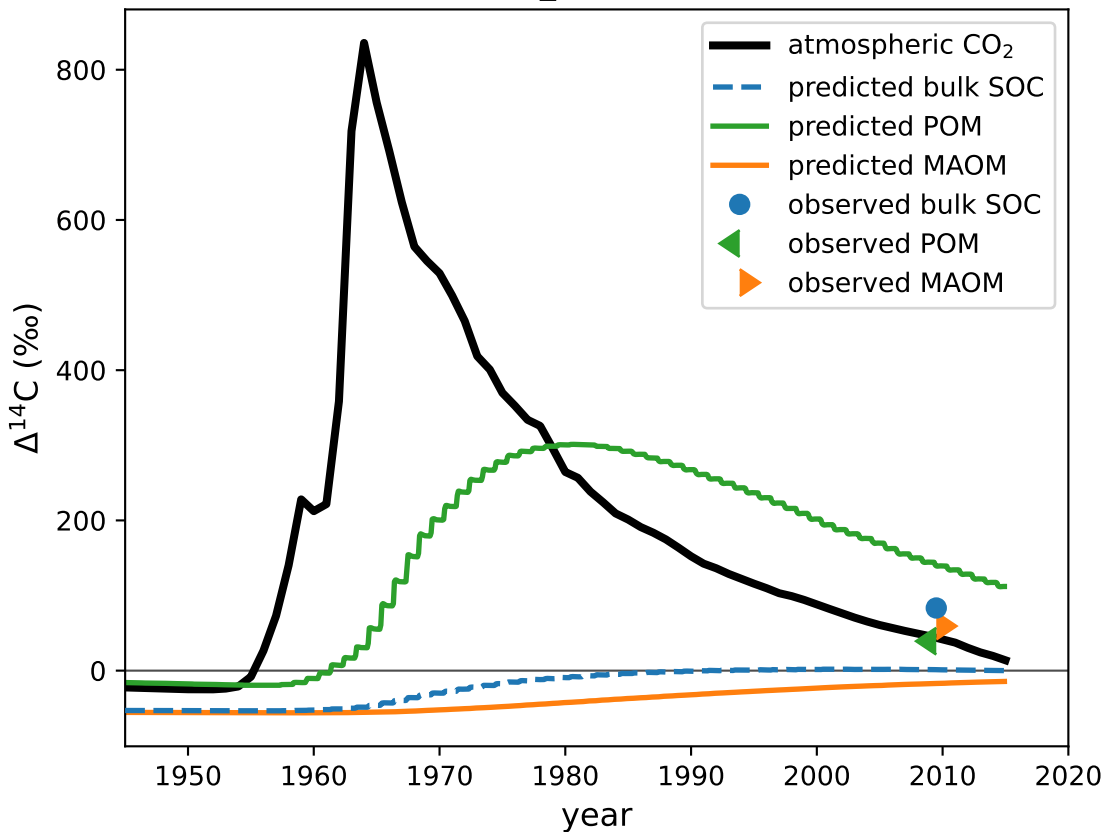

Supplement: Supplementary file 188 [file gmd-2023-242-supplement.zip]

MEND  
Schrumpf\_2013, Gebesee, Gebesee.1

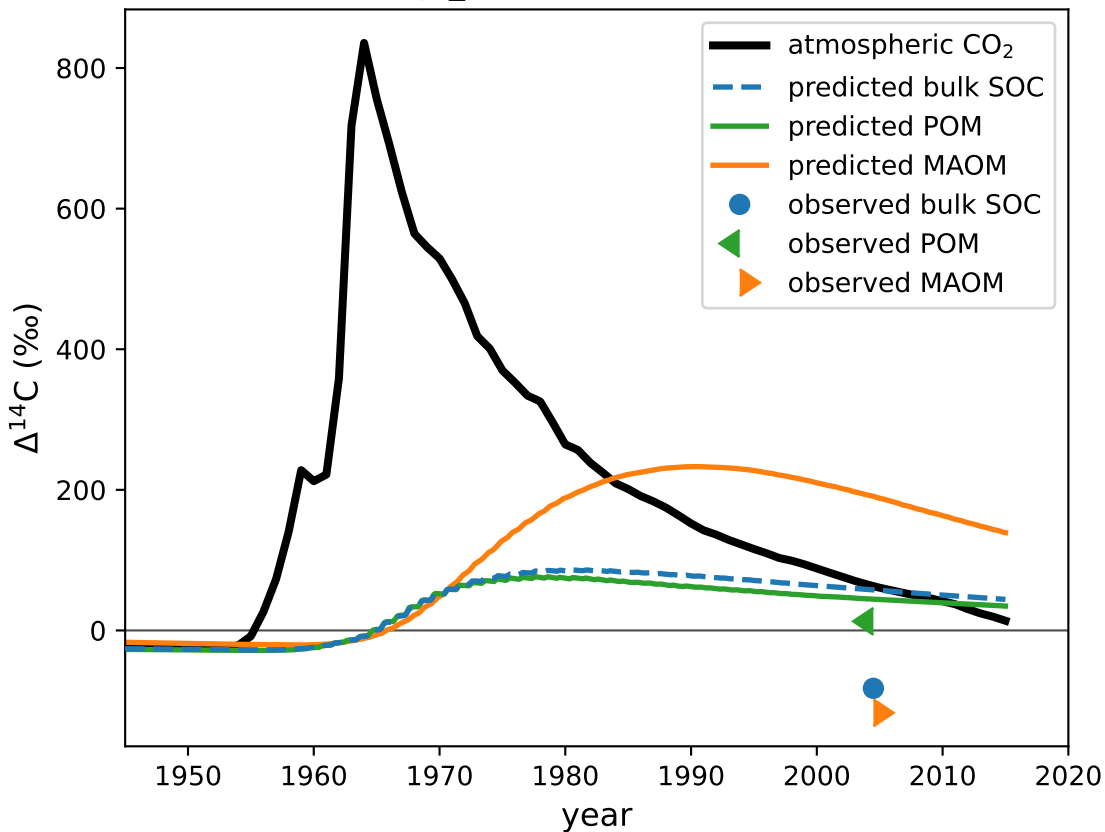

Supplement: Supplementary file 189 [file gmd-2023-242-supplement.zip]

MIMICS  
Schrumpf\_2013, Easter Bush, Easter Bush.1

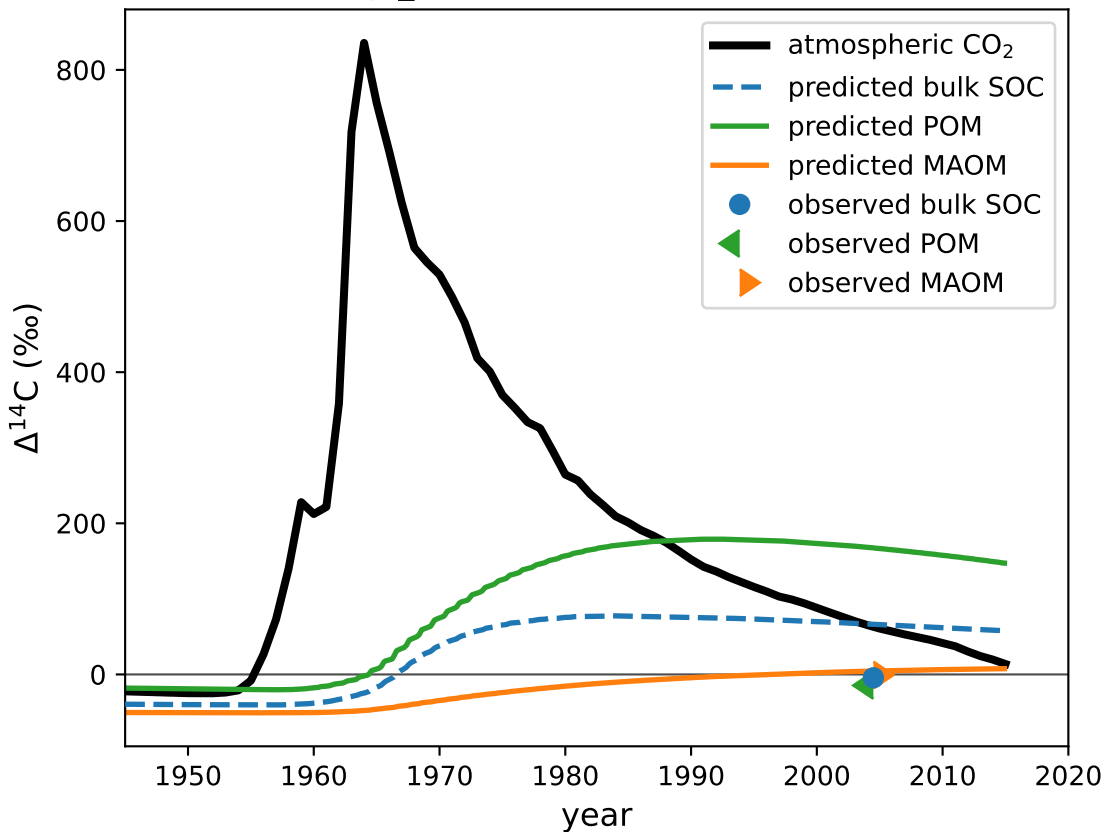

Supplement: Supplementary file 190 [file gmd-2023-242-supplement.zip]

Millennial  
Marin-Spiotta\_2008, Sierra de Cayey, Active pastures

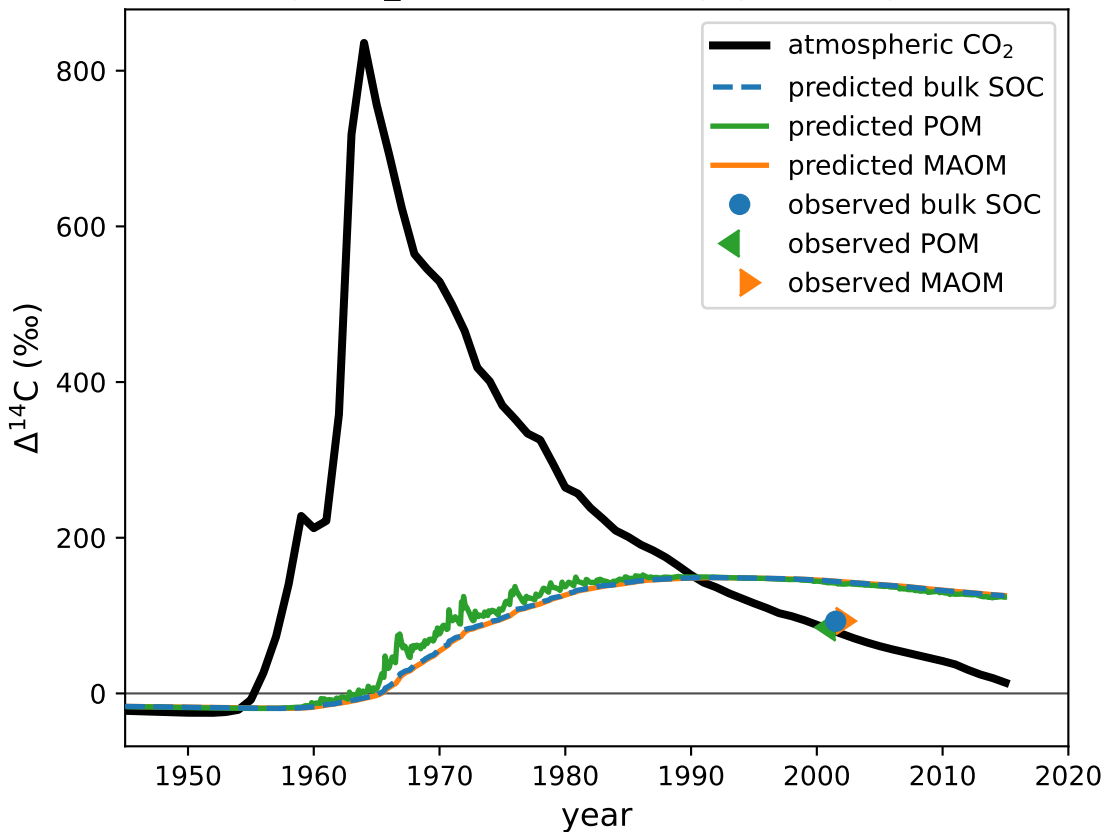

Supplement: Supplementary file 191 [file gmd-2023-242-supplement.zip]

MEND  
McFarlane\_2013, NH Bartlett Forest, B3

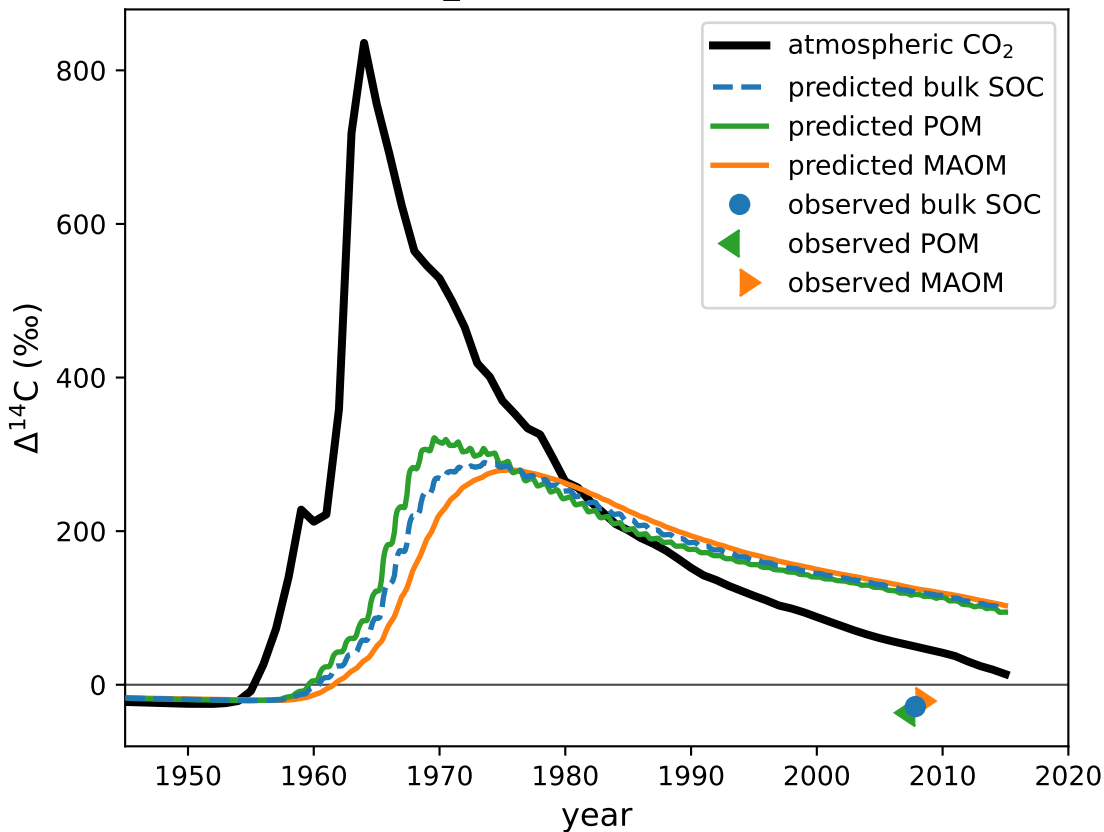

Supplement: Supplementary file 192 [file gmd-2023-242-supplement.zip]

CORPSE  
Baisden\_2002, Riverbank, Riverbank.1997

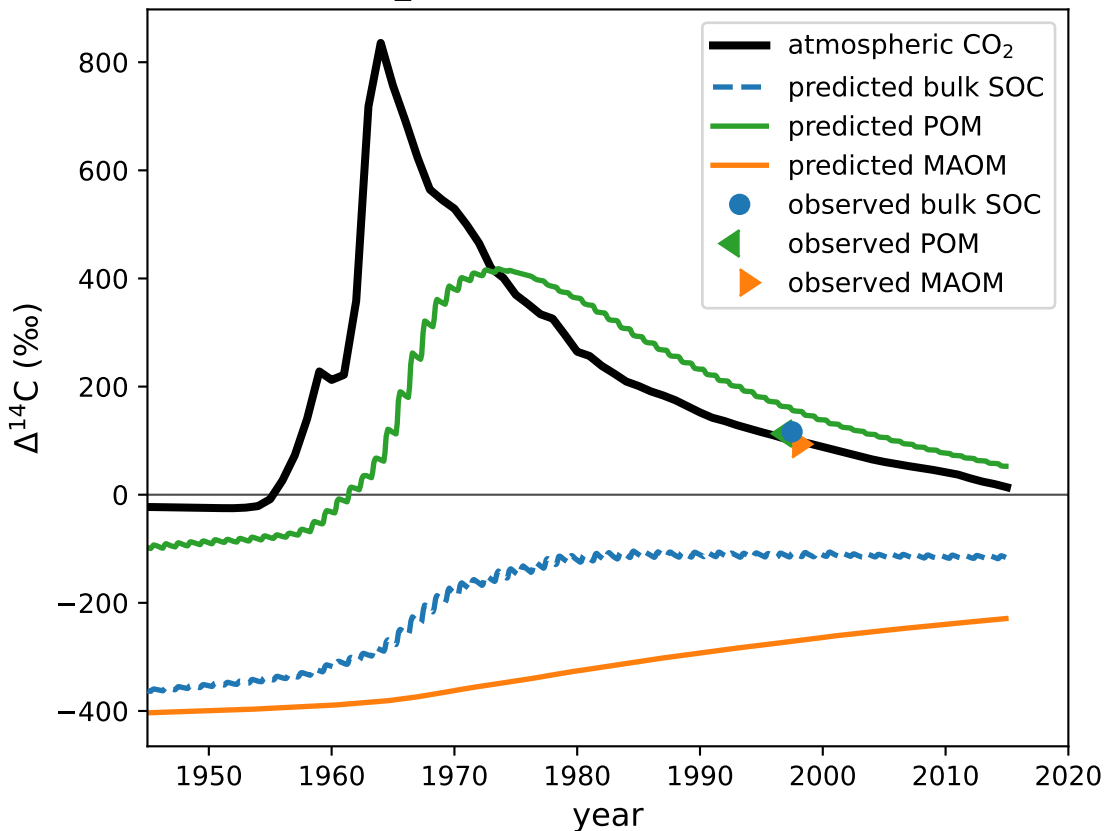

Supplement: Supplementary file 193 [file gmd-2023-242-supplement.zip]

CORPSE  
McFarlane\_2013, NH Bartlett Forest, B4

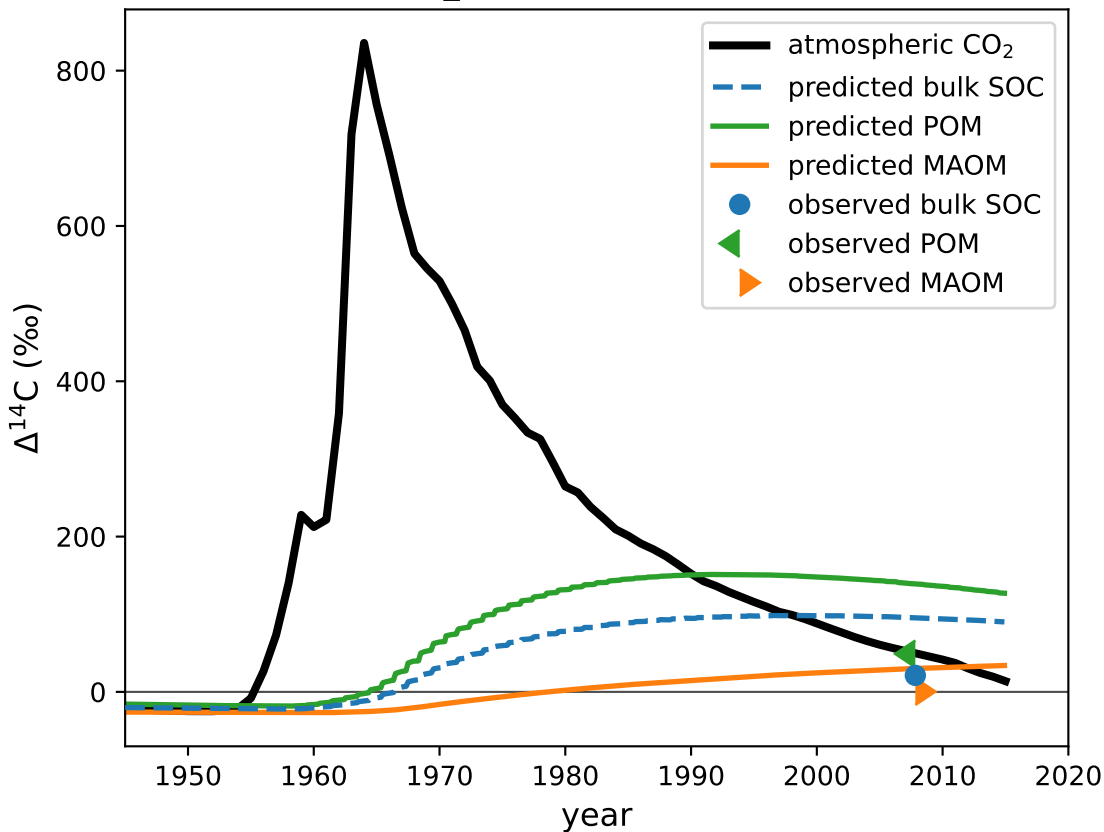

Supplement: Supplementary file 195 [file gmd-2023-242-supplement.zip]

# MEND

Marin-Spiotta\_2008, Sierra de Cayey, 20yr secondary forest

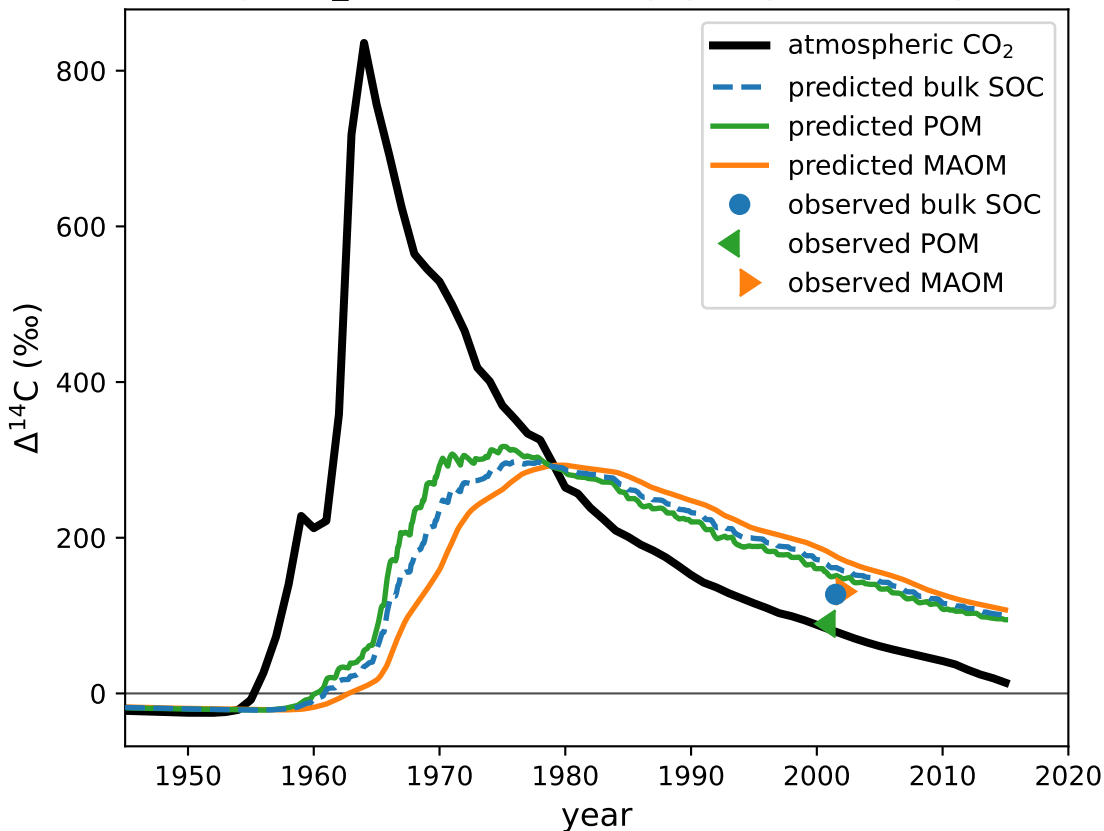

Supplement: Supplementary file 196 [file gmd-2023-242-supplement.zip]

Millennial  
McFarlane\_2013, MO Ozark BREA, M4

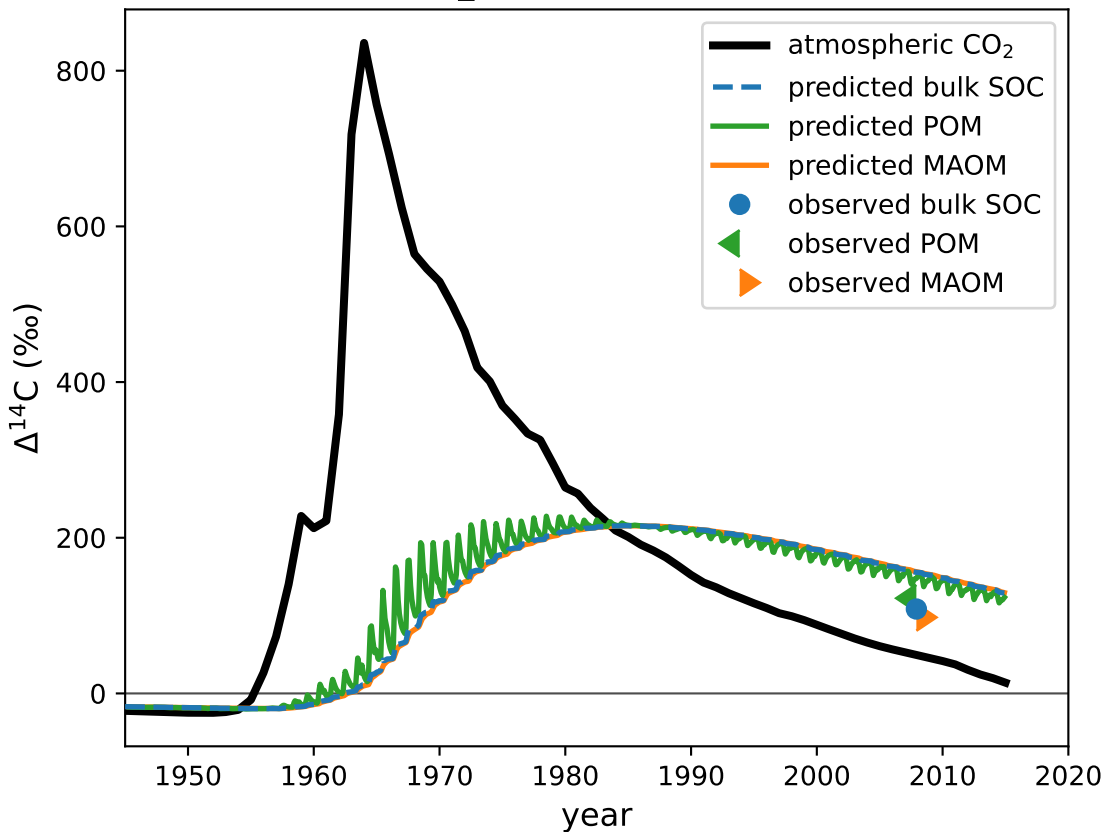

Supplement: Supplementary file 197 [file gmd-2023-242-supplement.zip]

Millennial  
McFarlane\_2013, Mi-Fine Colonial Point, C5

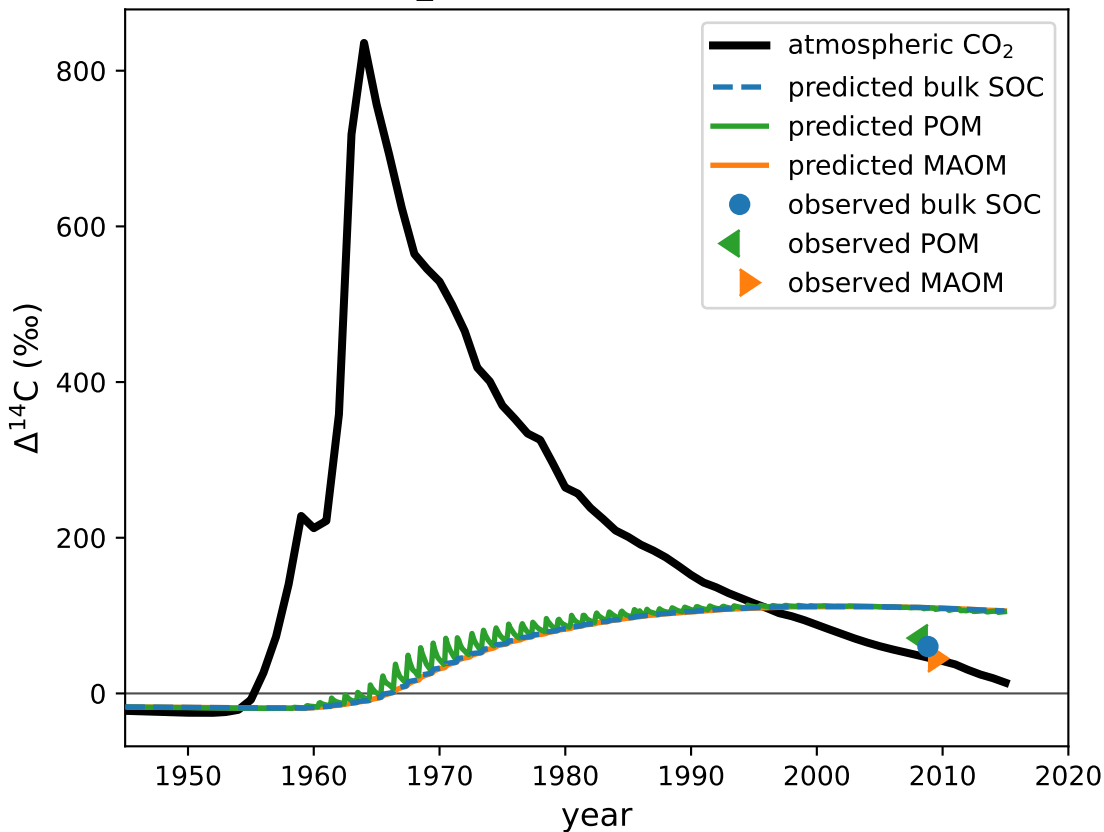

Supplement: Supplementary file 198 [file gmd-2023-242-supplement.zip]

CORPSE  
McFarlane\_2013, NH Bartlett Forest, B2

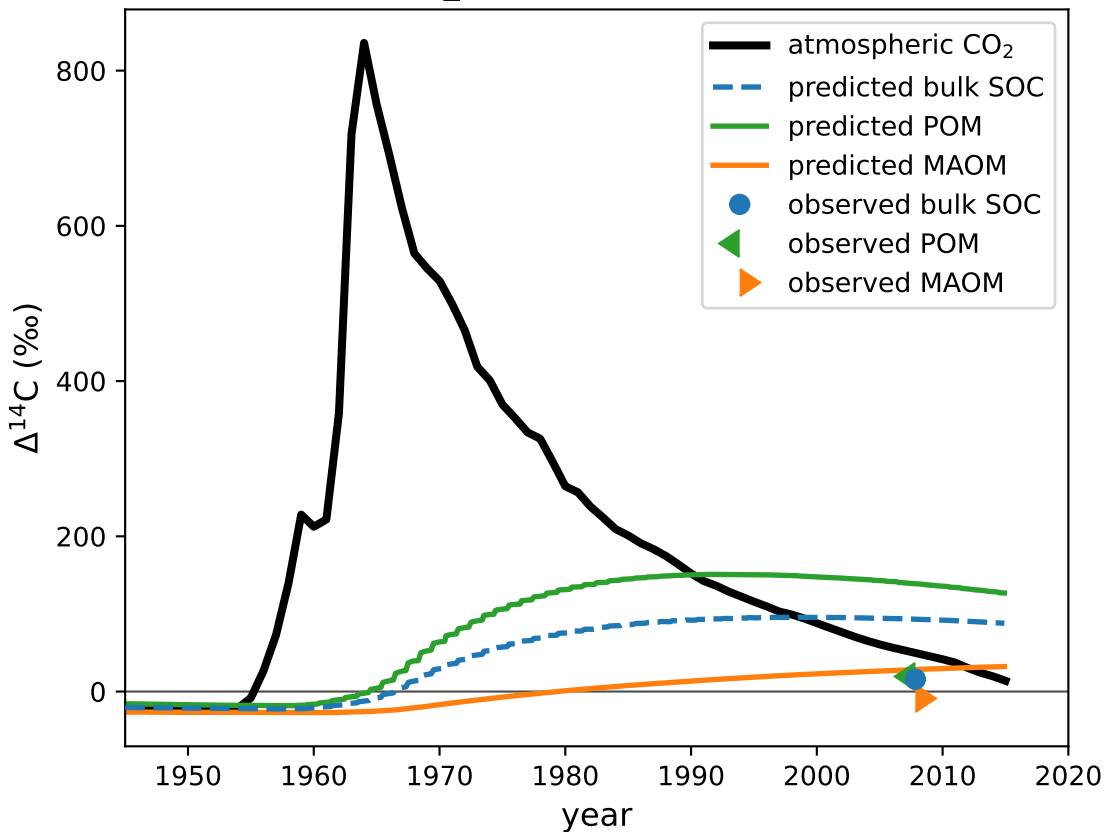

Supplement: Supplementary file 199 [file gmd-2023-242-supplement.zip]

SOMic  
Harden\_2002, Dinesen, DPPR2

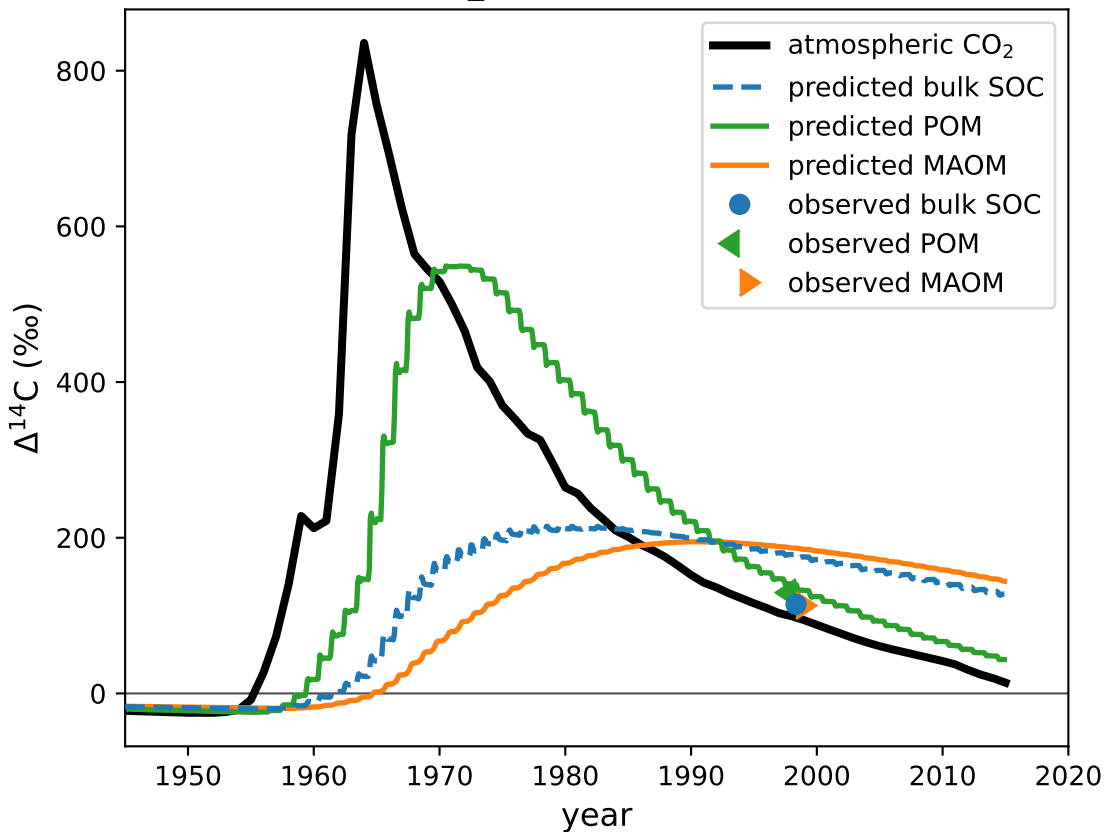

Supplement: Supplementary file 200 [file gmd-2023-242-supplement.zip]

Millennial  
Lemke\_2006, Solling, Solling\_DO\_F3

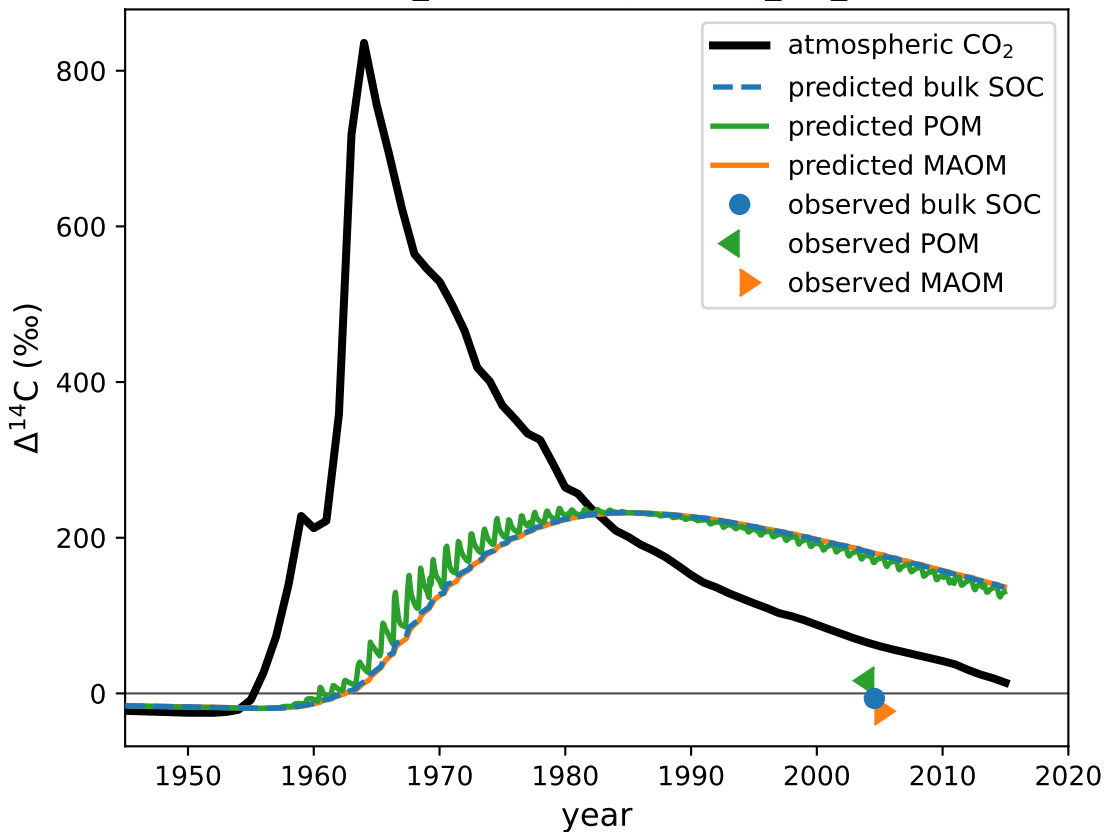

Supplement: Supplementary file 201 [file gmd-2023-242-supplement.zip]

SOMic  
Schrumpf\_2013, Carlow, Carlow.1

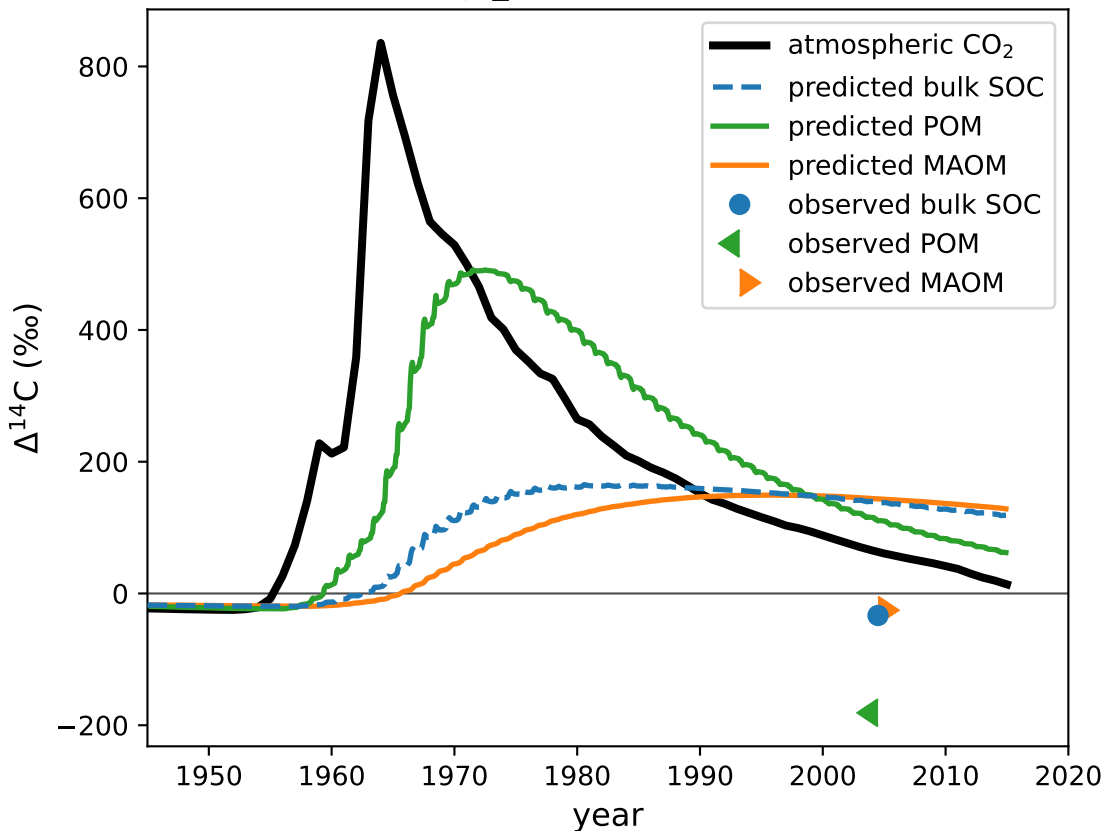

Supplement: Supplementary file 202 [file gmd-2023-242-supplement.zip]

## CORPSE

Marin-Spiotta\_2008, Sierra de Cayey, 80yr secondary forest

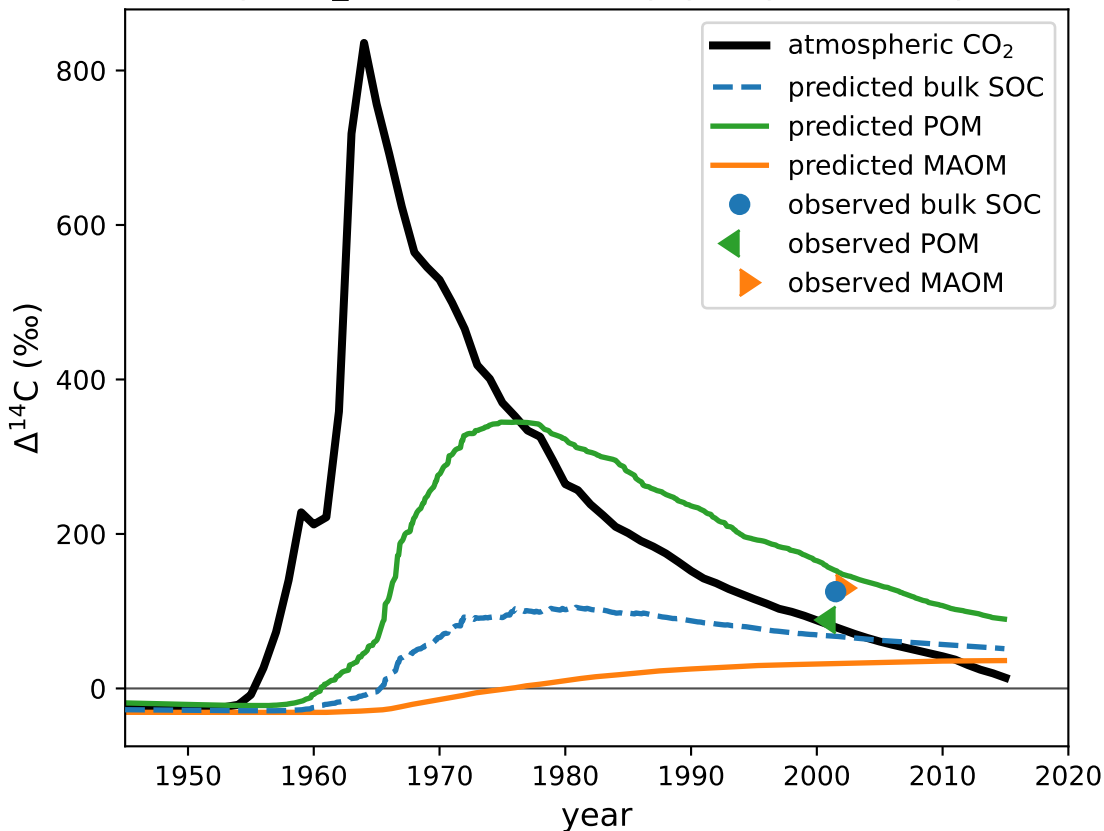

Supplement: Supplementary file 203 [file gmd-2023-242-supplement.zip]

SOMic  
Lemke\_2006, Solling, Solling\_DO\_F1

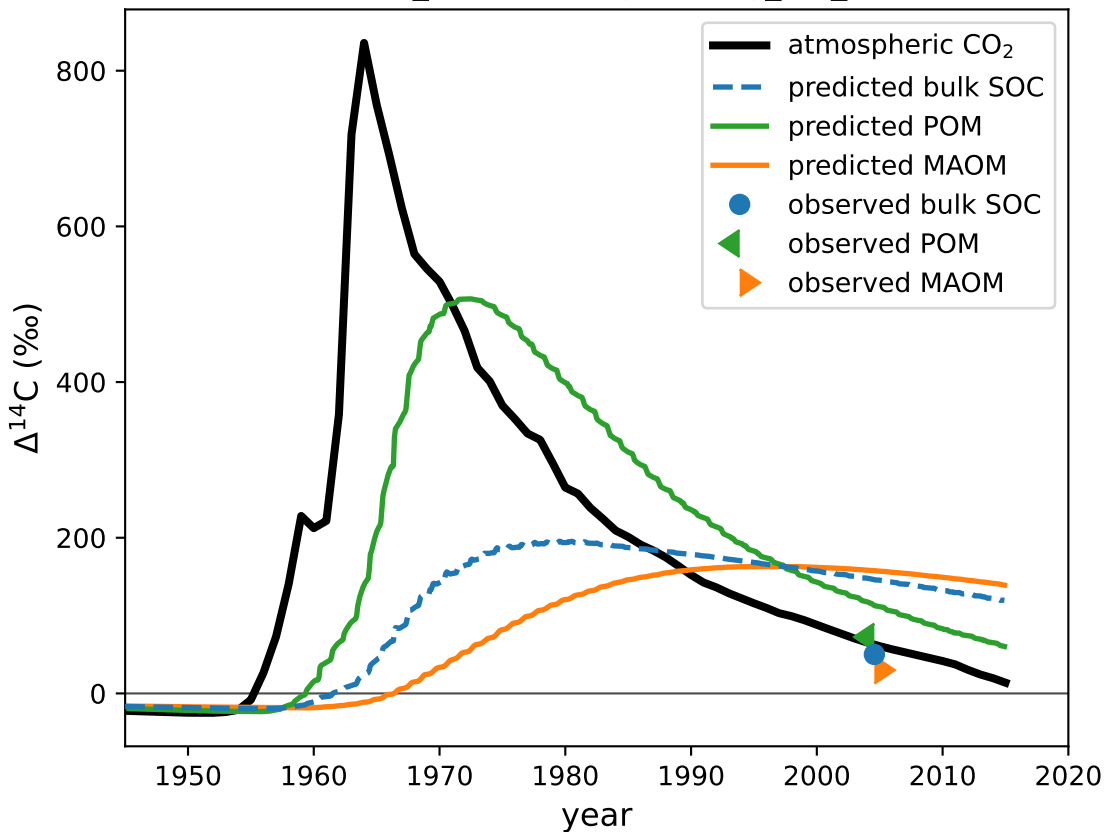

Supplement: Supplementary file 204 [file gmd-2023-242-supplement.zip]
