# Supplementary figures and images for: Radiocarbon analysis reveals underestimation of soil organic carbon persistence in new-generation soil models (part 3 of 4)
Source: Copernicus journal article supplement (doi:10.5194/gmd-2023-242), 2024-01-19

SOMic  
Marin-Spiotta\_2008, Sierra de Cayey, 10yr secondary forest

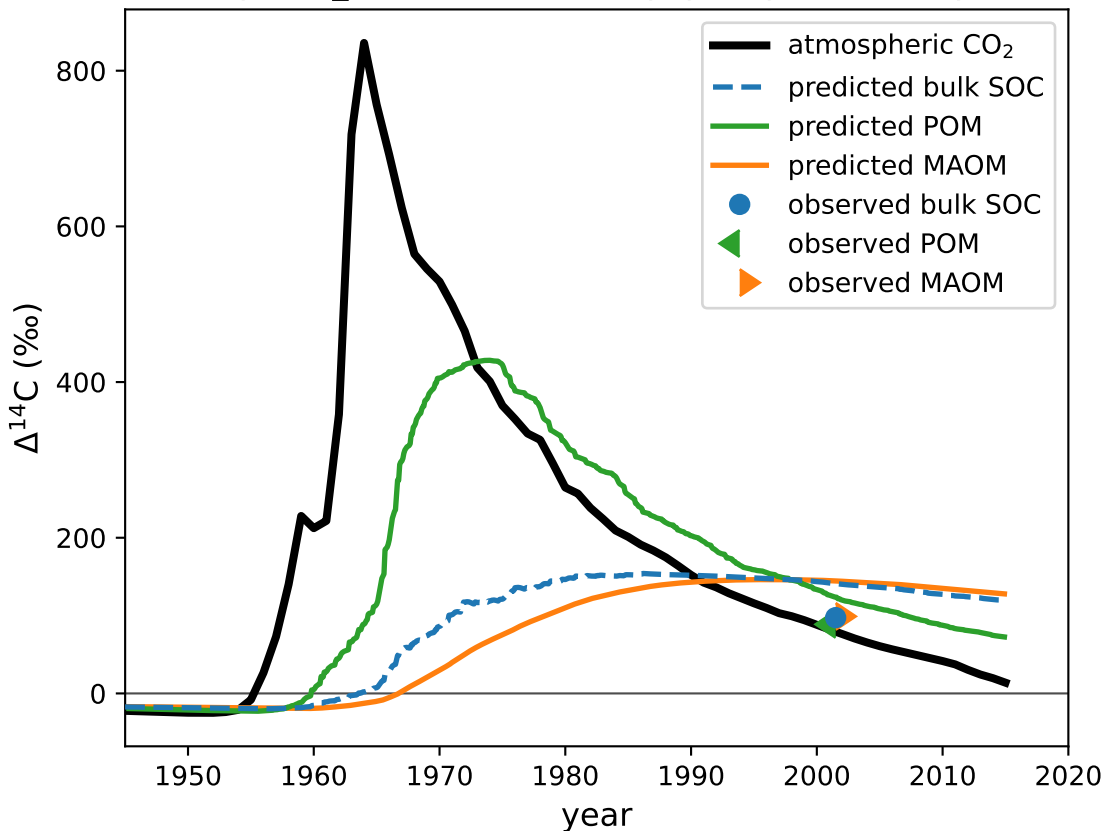

Supplement: Supplementary file 205 [file gmd-2023-242-supplement.zip]

CORPSE  
McFarlane\_2013, Mi-Fine Colonial Point, C3

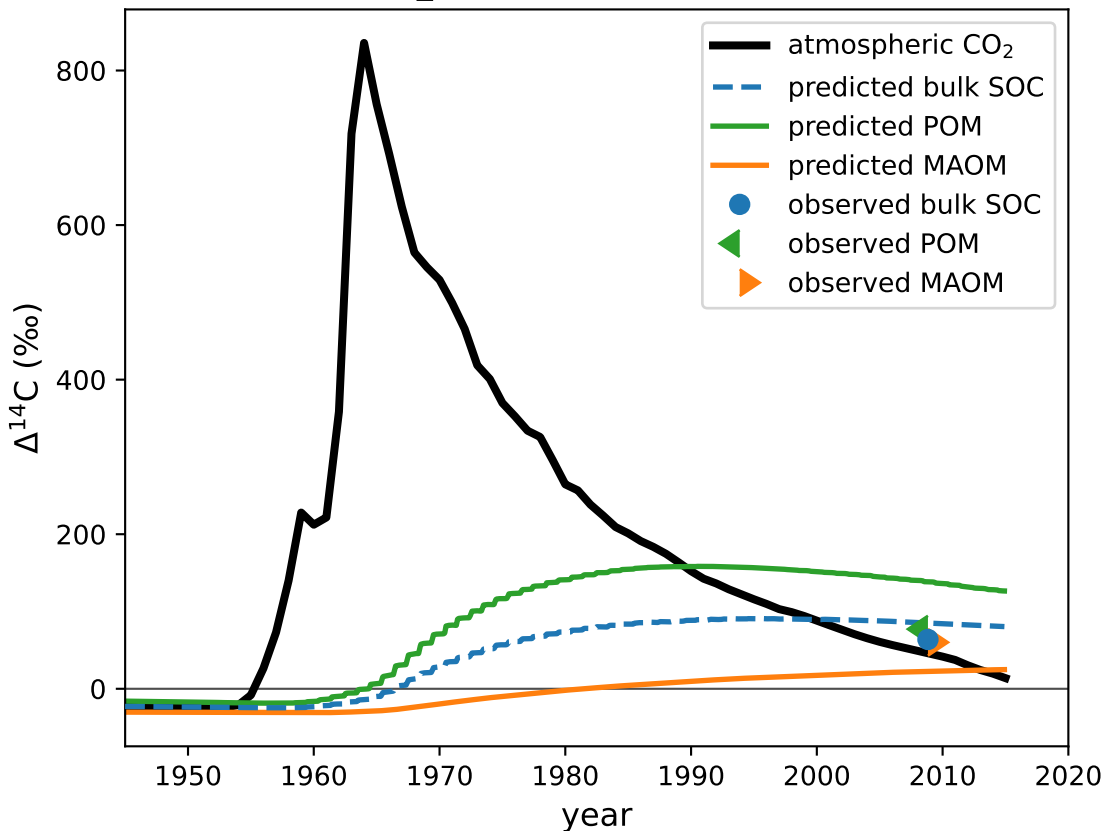

Supplement: Supplementary file 206 [file gmd-2023-242-supplement.zip]

MEND  
Schrumpf\_2013, Sorø, Sorø.1

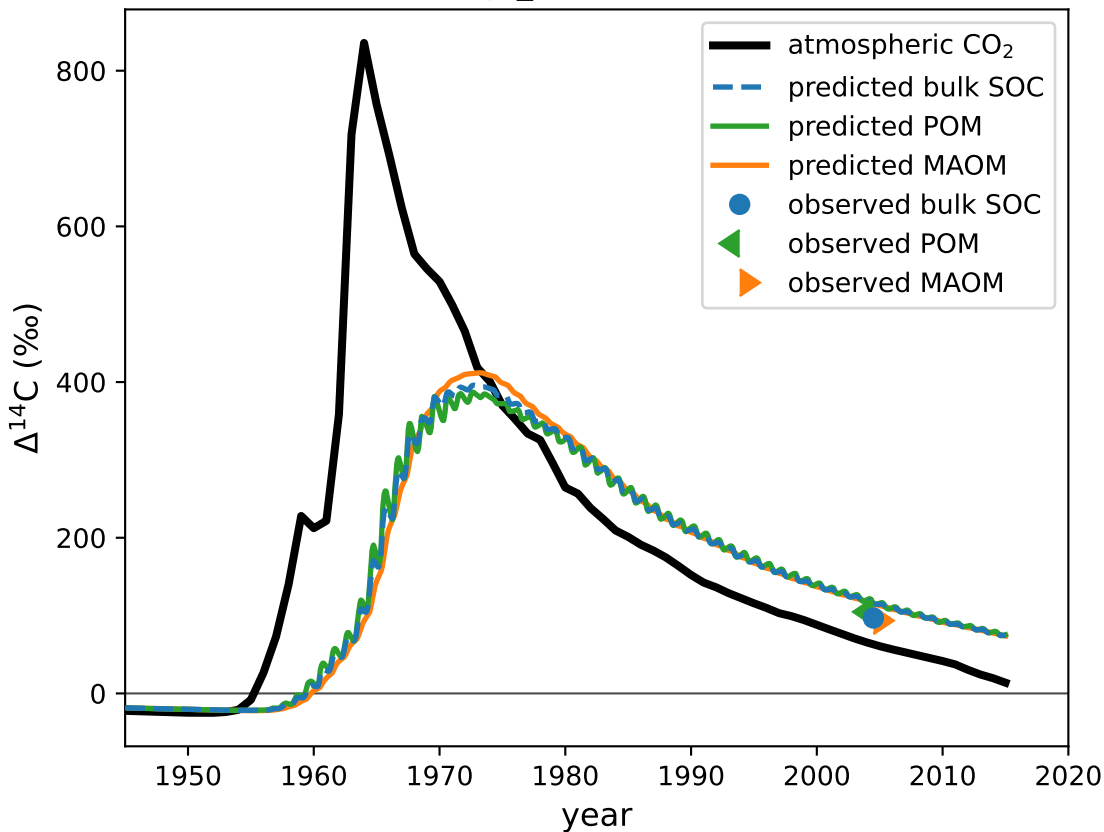

Supplement: Supplementary file 207 [file gmd-2023-242-supplement.zip]

CORPSE  
Lemke\_2006, Solling, Solling\_DO\_F3

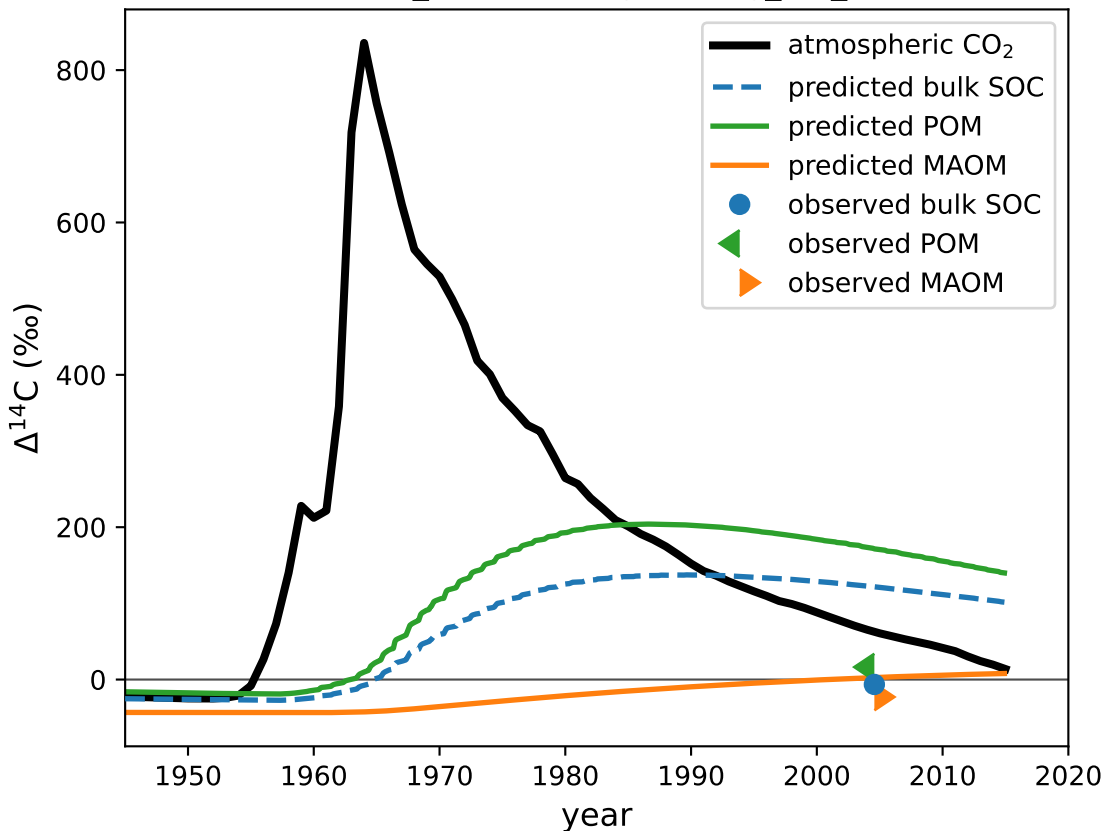

Supplement: Supplementary file 208 [file gmd-2023-242-supplement.zip]

MEND  
McFarlane\_2013, NH Bartlett Forest, B1

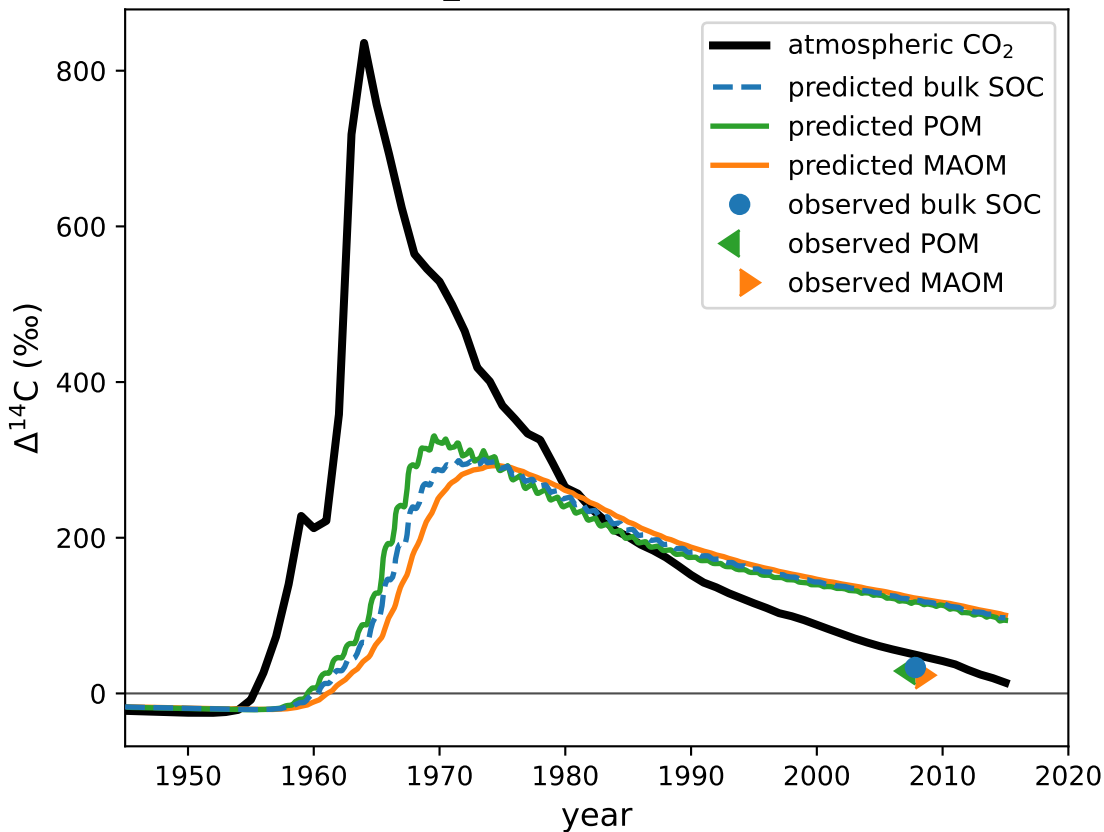

Supplement: Supplementary file 209 [file gmd-2023-242-supplement.zip]

CORPSE  
McFarlane\_2013, NH Bartlett Forest, B3

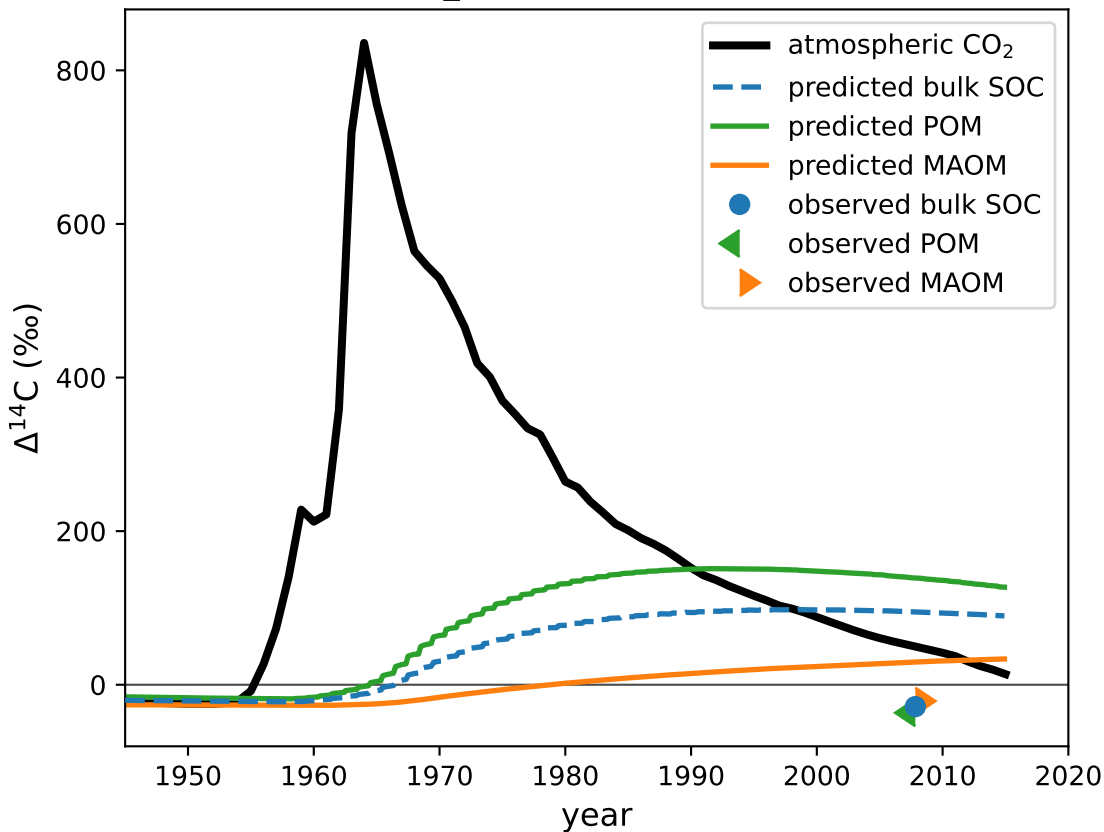

Supplement: Supplementary file 210 [file gmd-2023-242-supplement.zip]

MEND  
Baisden\_2002, China Hat, ChinaHat.1978

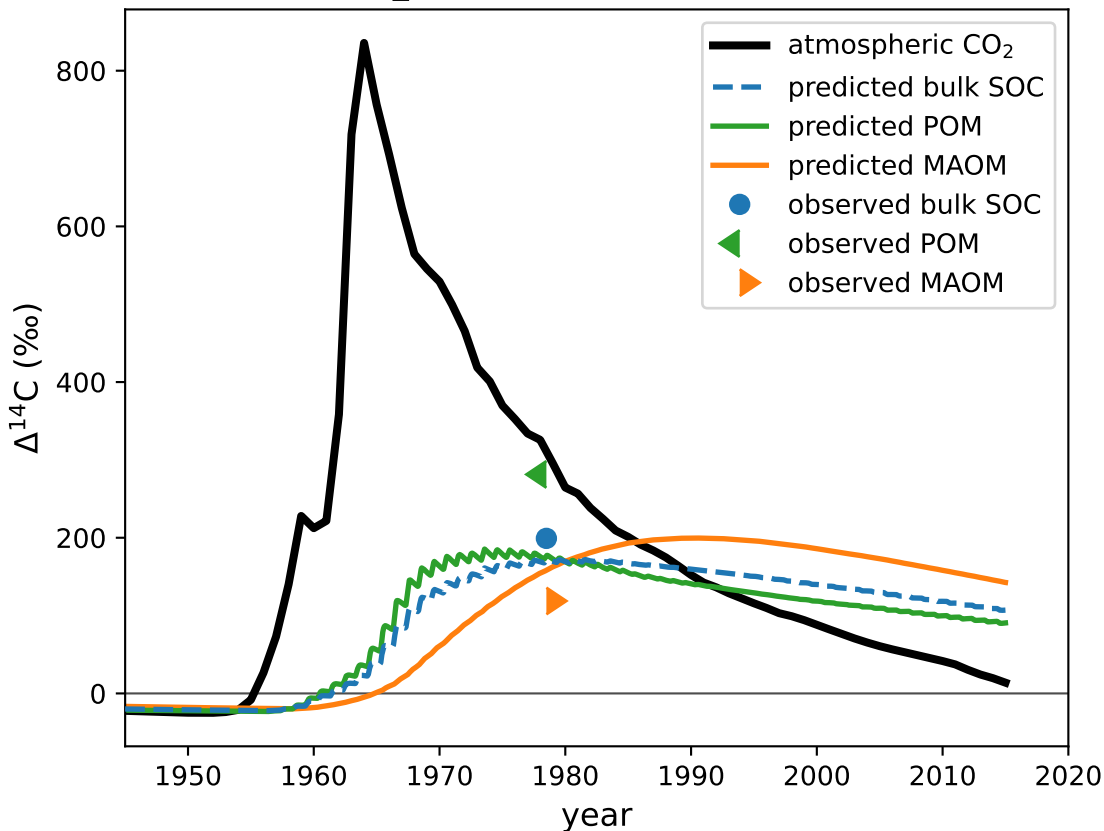

Supplement: Supplementary file 211 [file gmd-2023-242-supplement.zip]

Millennial  
Baisden\_2002, Riverbank, Riverbank.1949

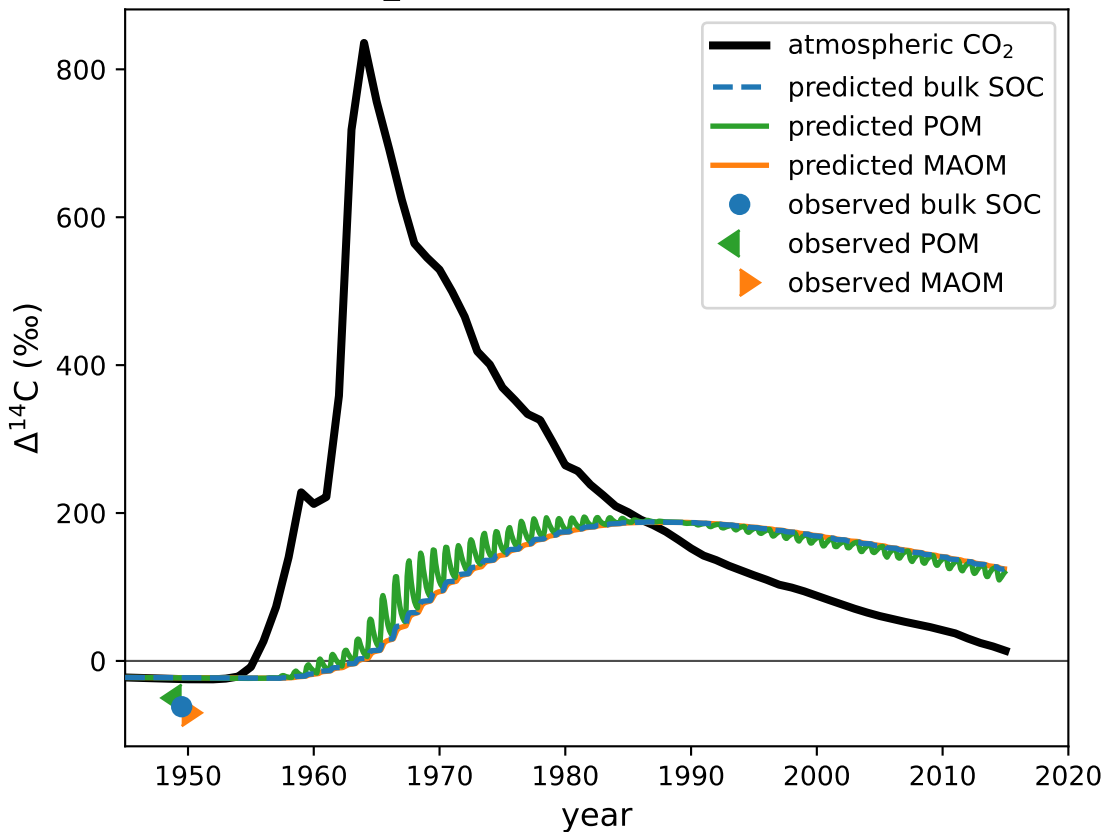

Supplement: Supplementary file 212 [file gmd-2023-242-supplement.zip]

Millennial  
McFarlane\_2013, MA Harvard Forest, H2

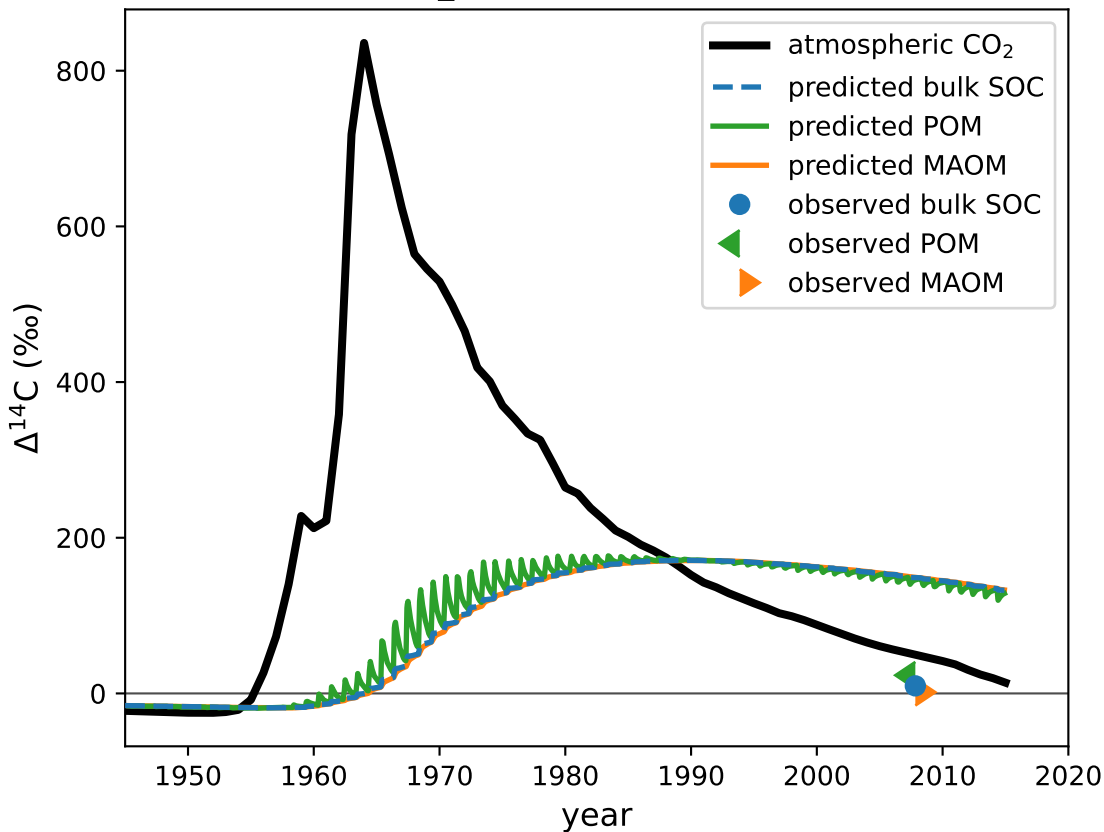

Supplement: Supplementary file 213 [file gmd-2023-242-supplement.zip]

MIMICS  
Rasmussen\_2018, GRwf, GRwf

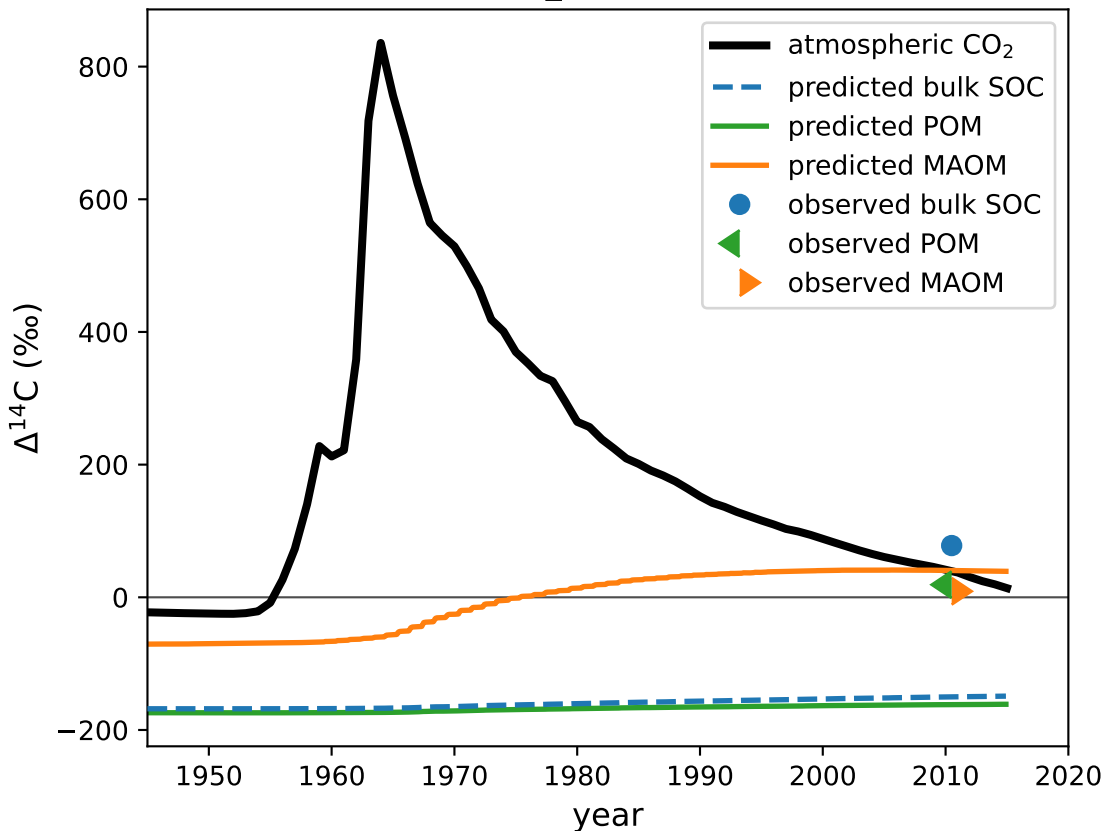

Supplement: Supplementary file 214 [file gmd-2023-242-supplement.zip]

SOMic  
Baisden\_2002, Riverbank, Riverbank.1949

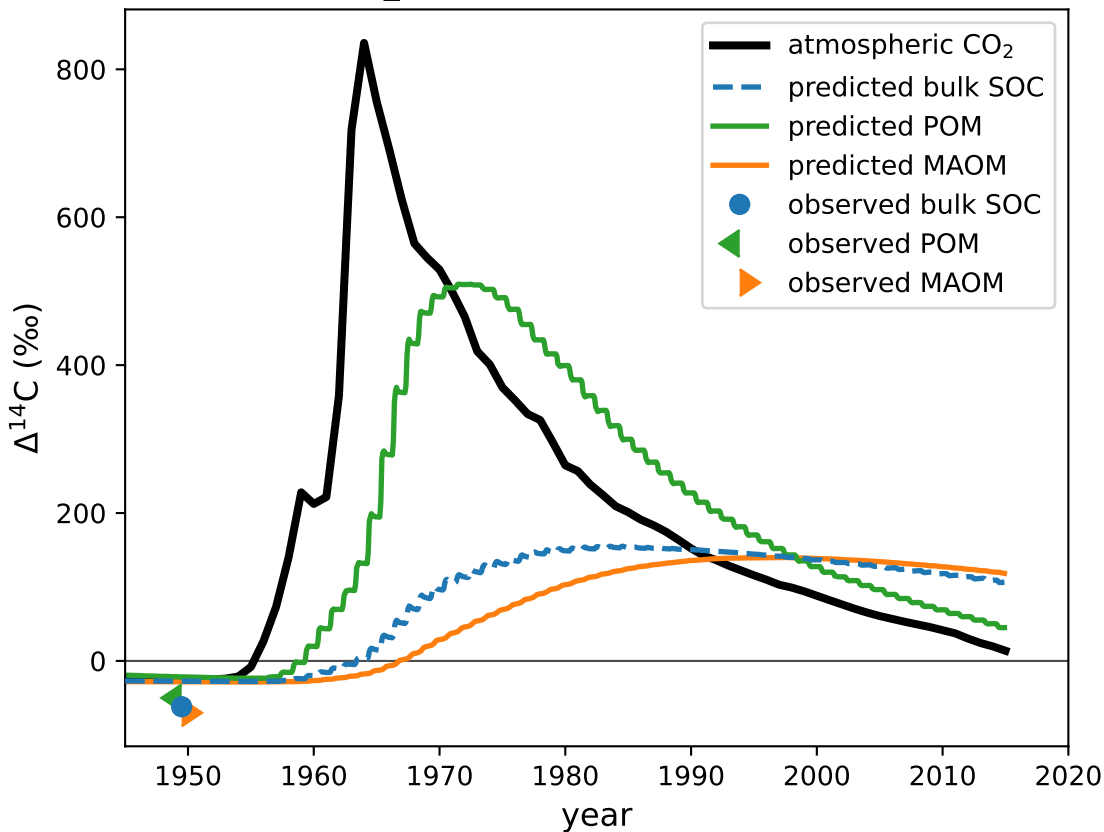

Supplement: Supplementary file 215 [file gmd-2023-242-supplement.zip]

MIMICS  
Baisden\_2002, Riverbank, Riverbank.1997

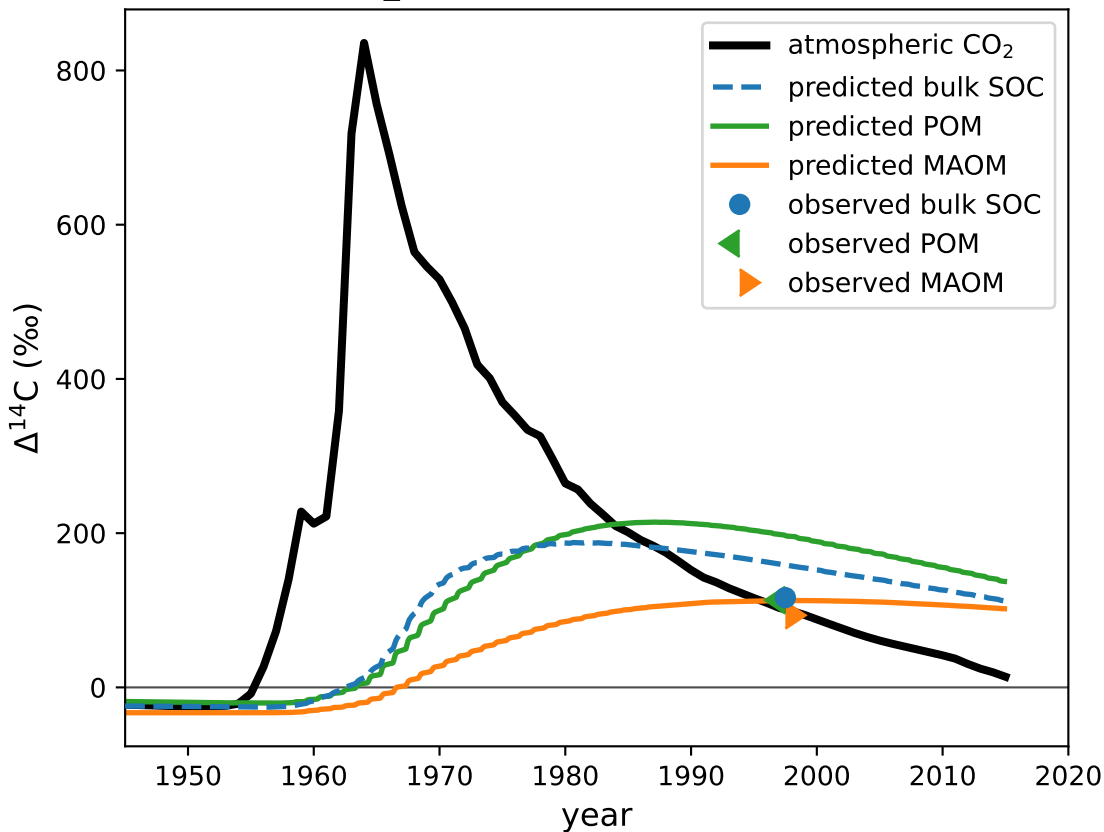

Supplement: Supplementary file 216 [file gmd-2023-242-supplement.zip]

Millennial  
McFarlane\_2013, Mi-Fine Colonial Point, C1

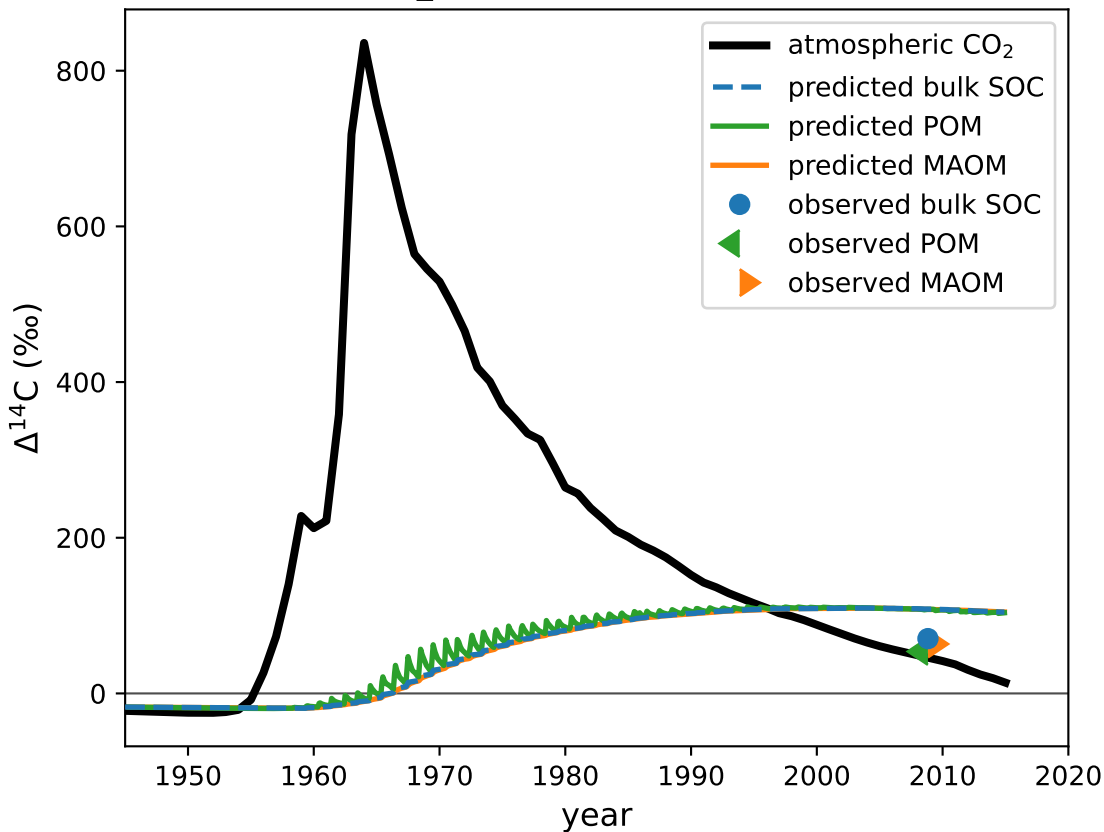

Supplement: Supplementary file 217 [file gmd-2023-242-supplement.zip]

MEND  
Meyer\_2012, Stubai, Abandoned

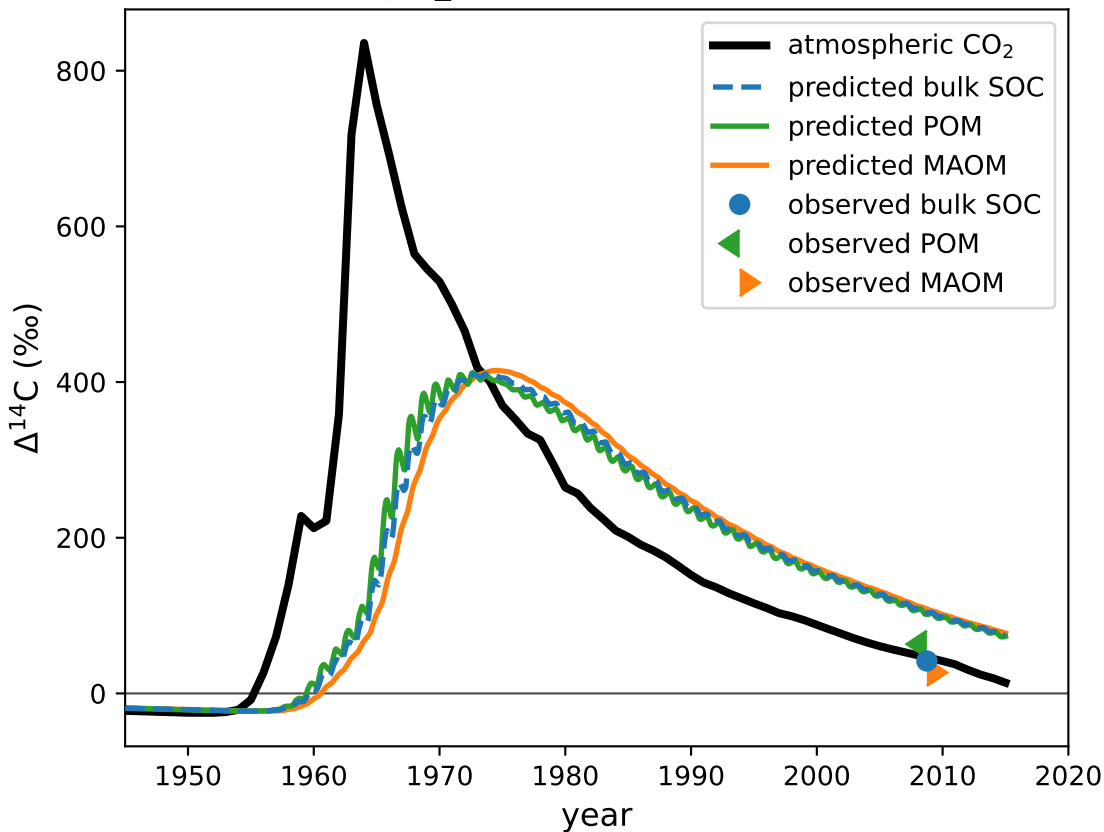

Supplement: Supplementary file 218 [file gmd-2023-242-supplement.zip]

Millennial  
Schrumpf\_2013, Hainich, Hainich.1

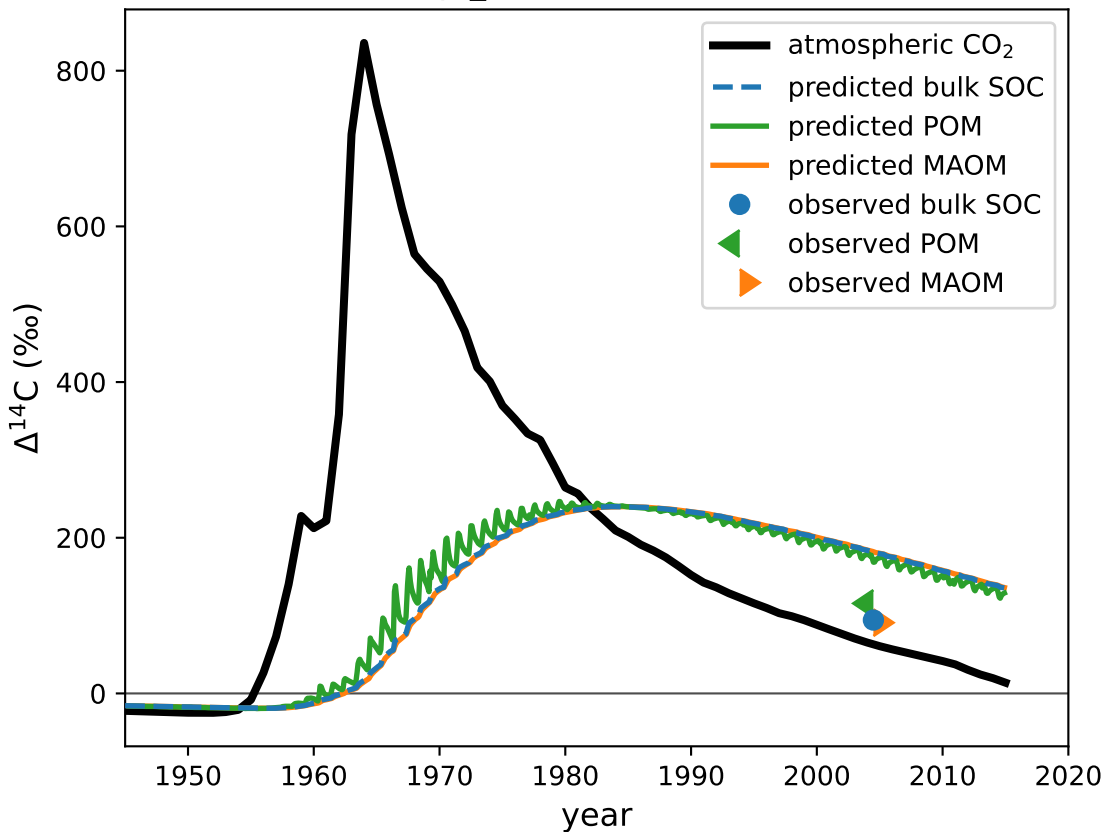

Supplement: Supplementary file 219 [file gmd-2023-242-supplement.zip]

Millennial  
Berhe\_2012, Tennessee Valley, summit comp

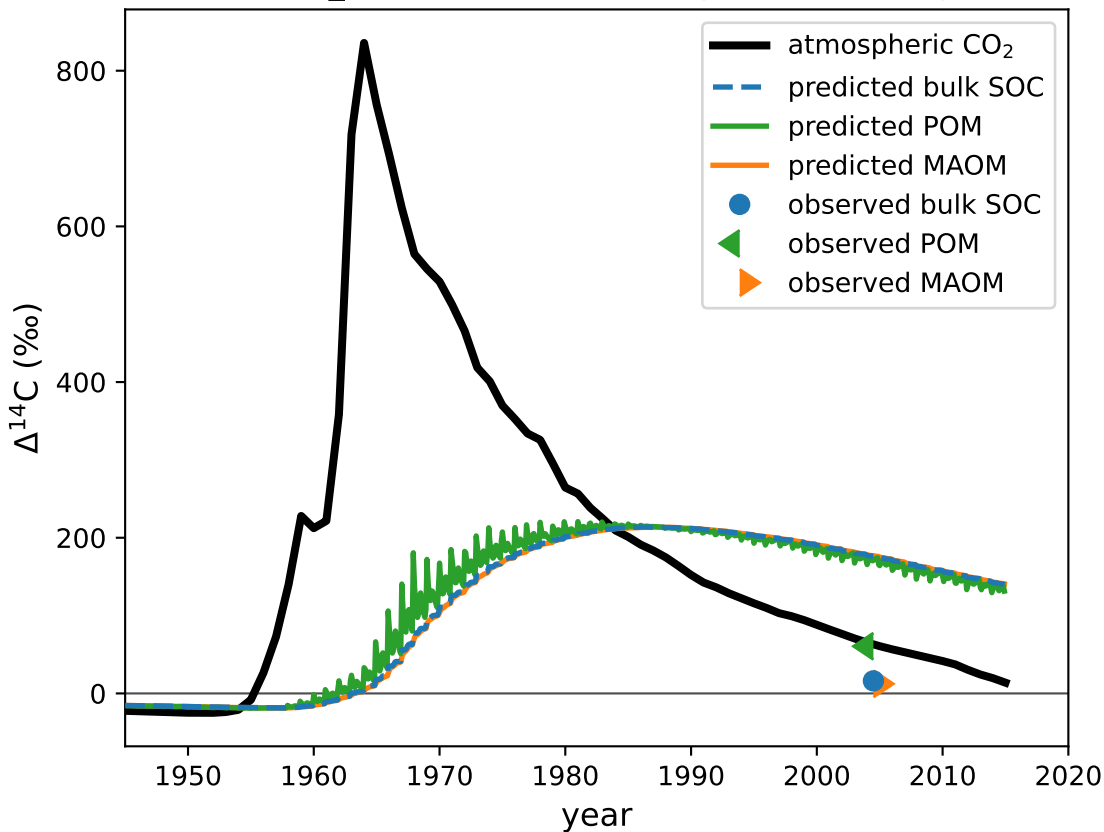

Supplement: Supplementary file 220 [file gmd-2023-242-supplement.zip]

# Millennial

Lybrand\_2017, Catalina CZO ponderosa, ponderosa pine\_divergent

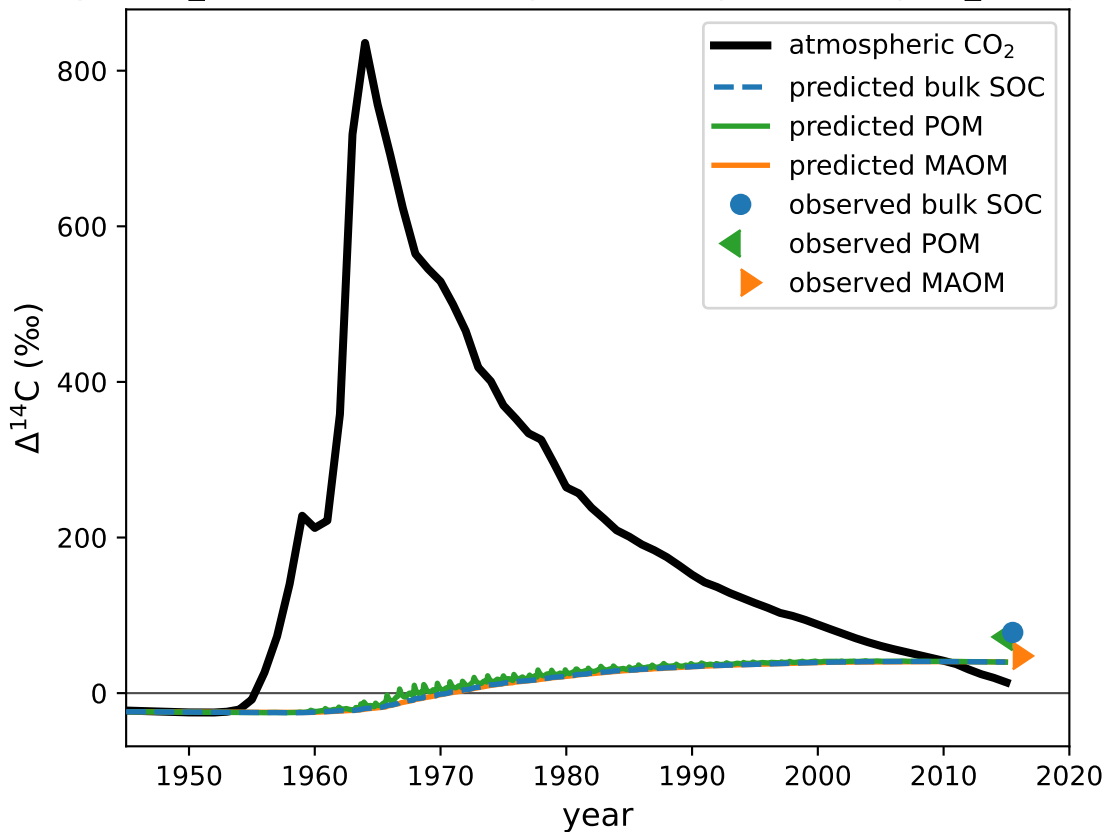

Supplement: Supplementary file 221 [file gmd-2023-242-supplement.zip]

# MEND

Marin-Spiotta\_2008, Sierra de Cayey, 10yr secondary forest

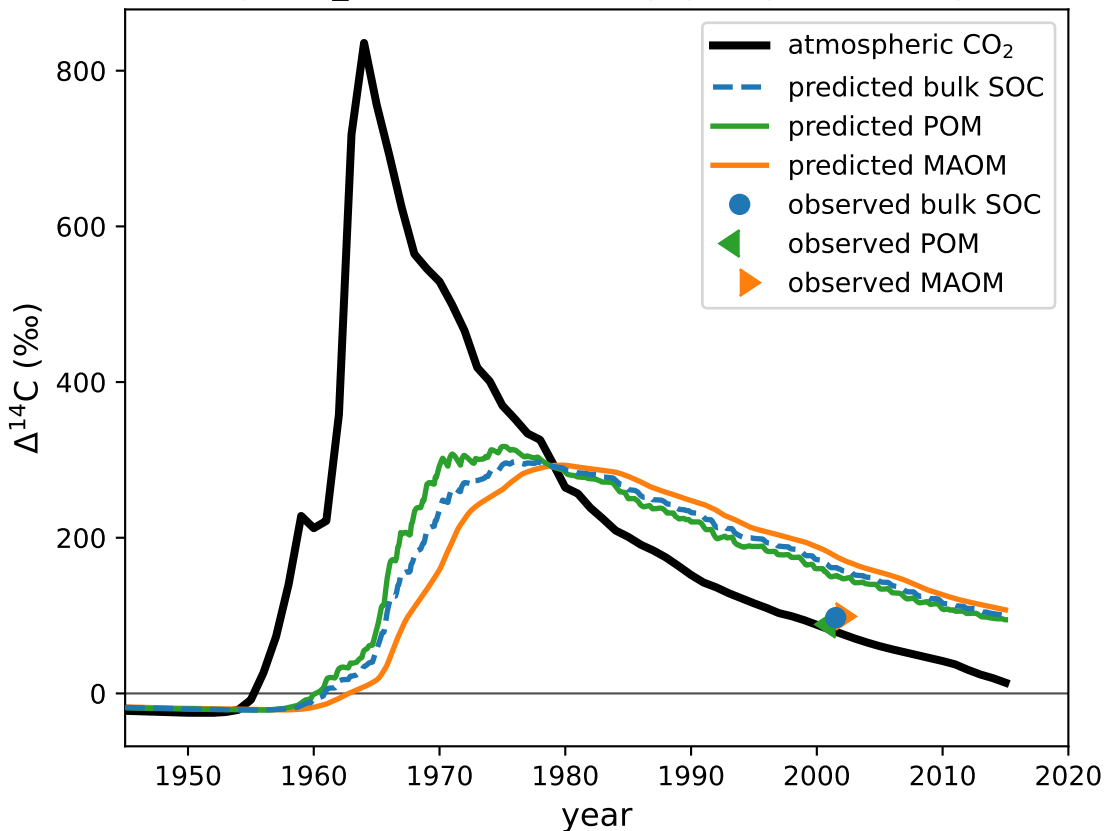

Supplement: Supplementary file 222 [file gmd-2023-242-supplement.zip]

MIMICS  
Marin-Spiotta\_2008, Sierra de Cayey, 30yr secondary forest

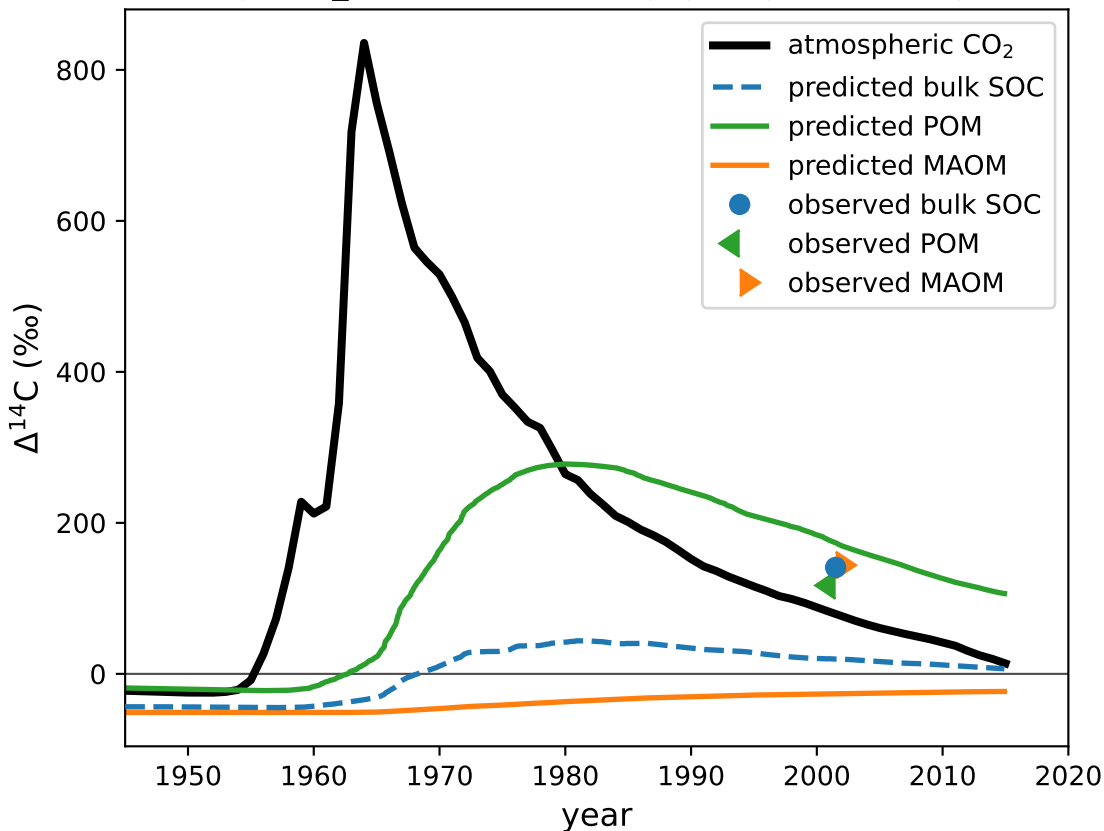

Supplement: Supplementary file 223 [file gmd-2023-242-supplement.zip]

MEND  
McFarlane\_2013, NH Bartlett Forest, B4

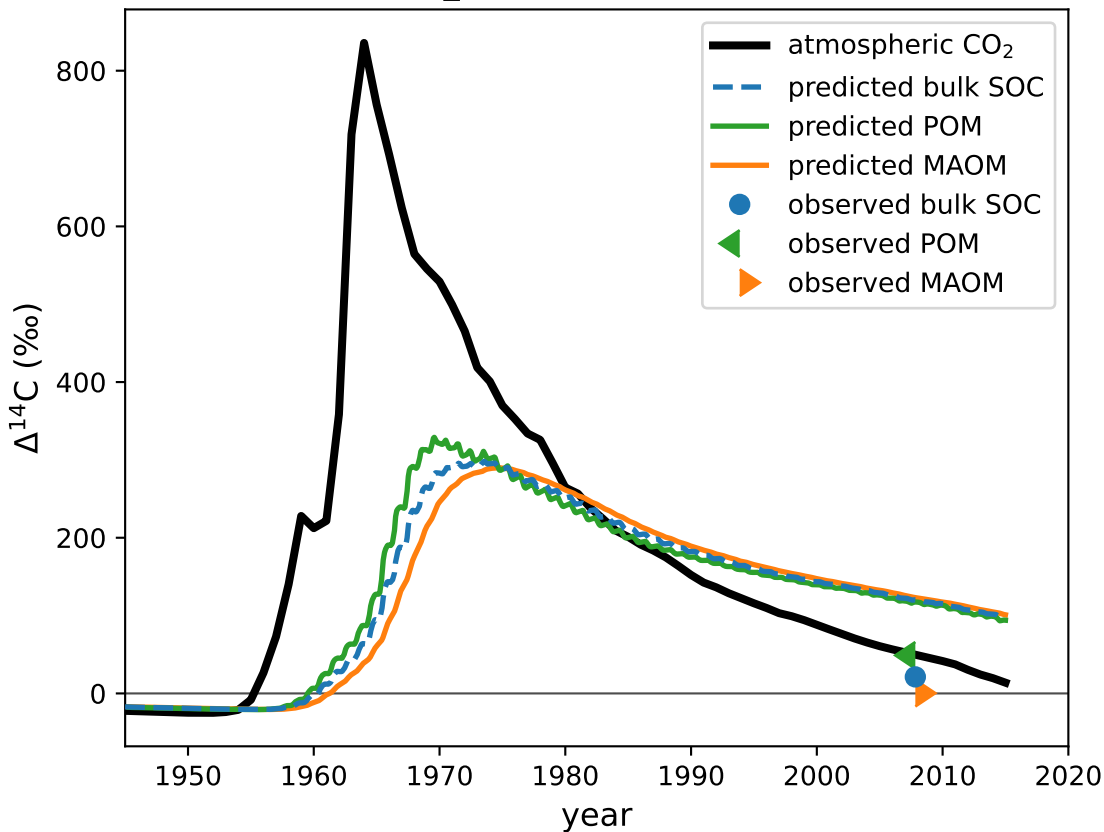

Supplement: Supplementary file 224 [file gmd-2023-242-supplement.zip]

CORPSE  
Rasmussen\_2018, BSrf, BSrf

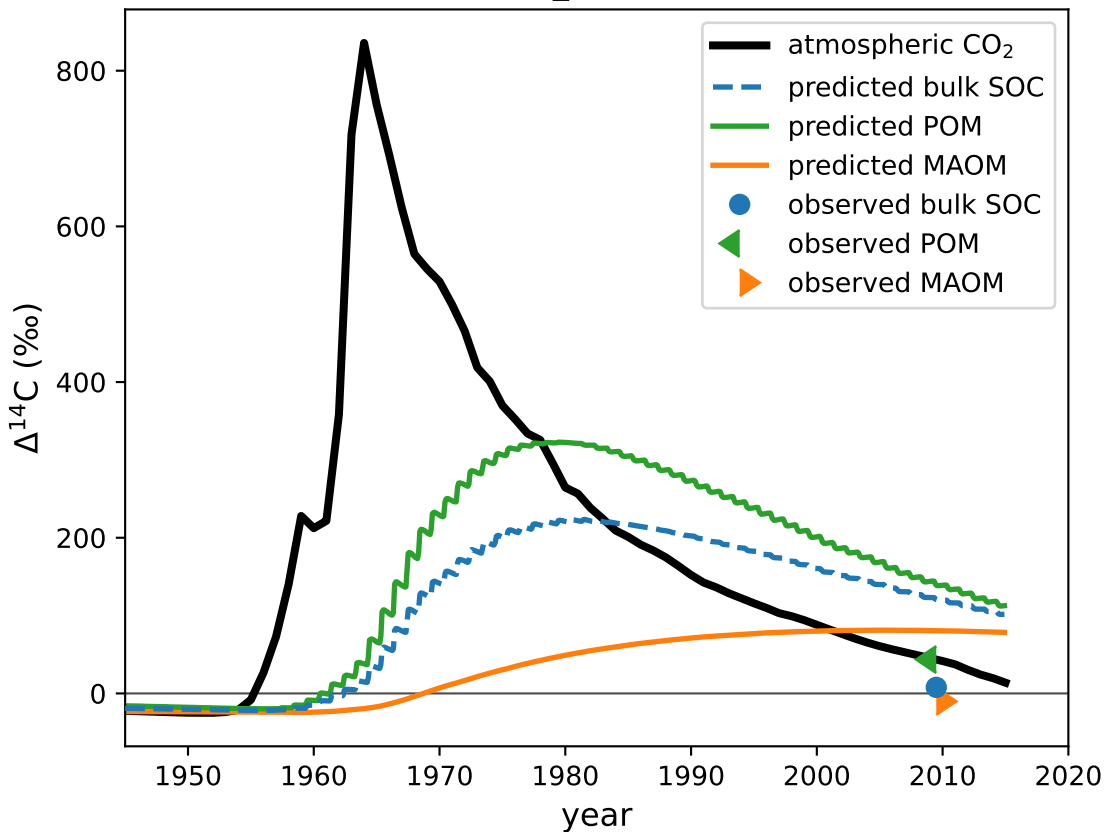

Supplement: Supplementary file 225 [file gmd-2023-242-supplement.zip]

MEND  
Meyer\_2012, Stubai, Meadow

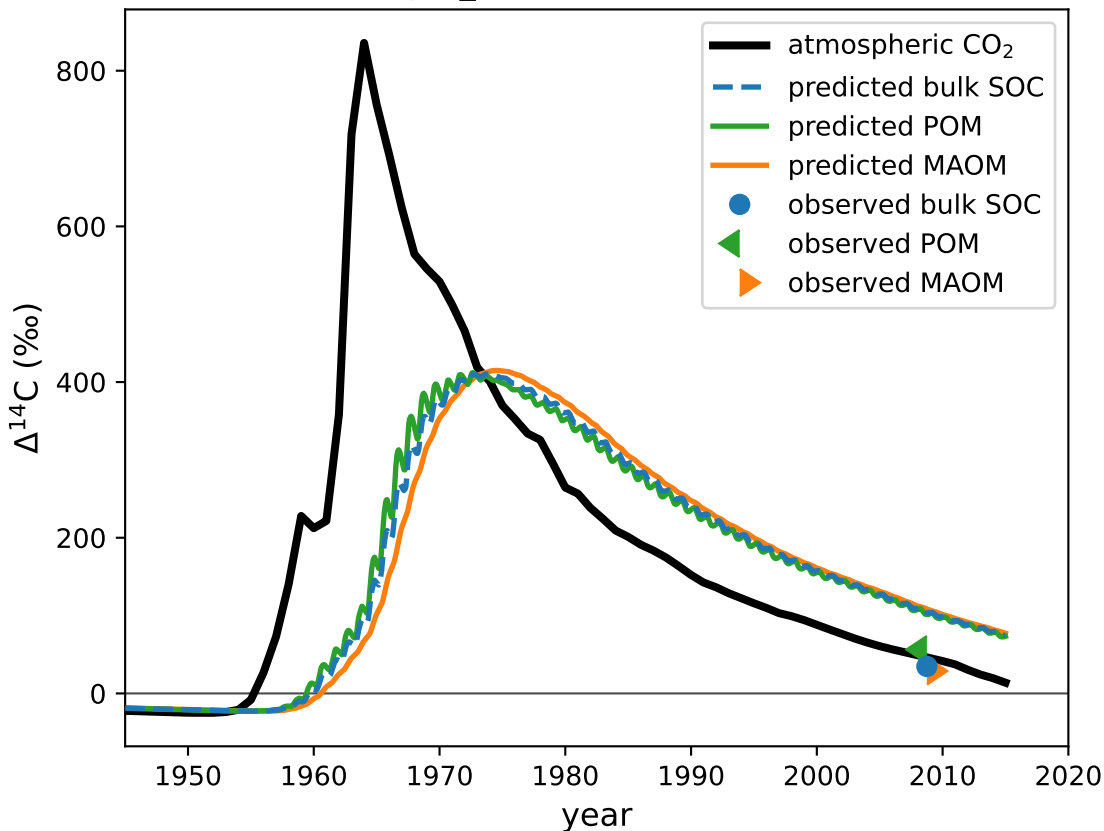

Supplement: Supplementary file 226 [file gmd-2023-242-supplement.zip]

MIMICS  
McFarlane\_2013, MI-Coarse UMBS, G3

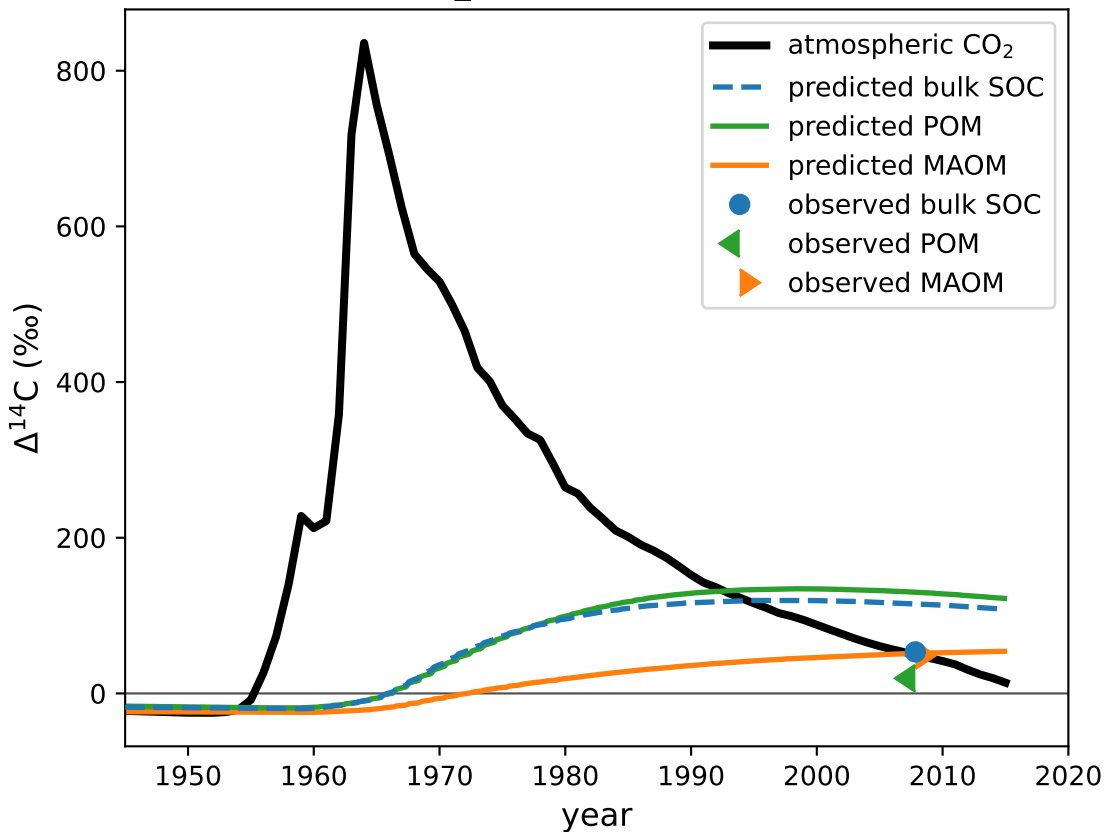

Supplement: Supplementary file 227 [file gmd-2023-242-supplement.zip]

Millennial  
Schrumpf\_2013, Norunda, Norunda.1

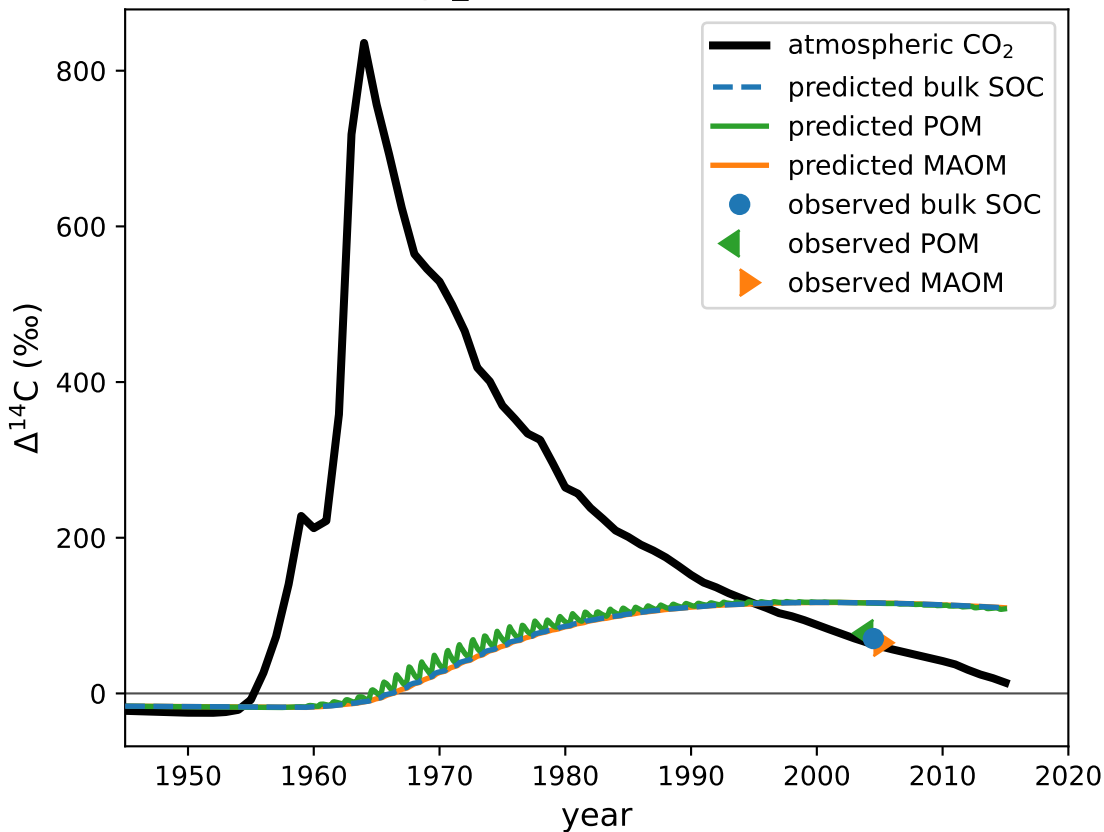

Supplement: Supplementary file 228 [file gmd-2023-242-supplement.zip]

MIMICS  
Heckman\_2010, Flagstaff Basalt, FGBA\_composite

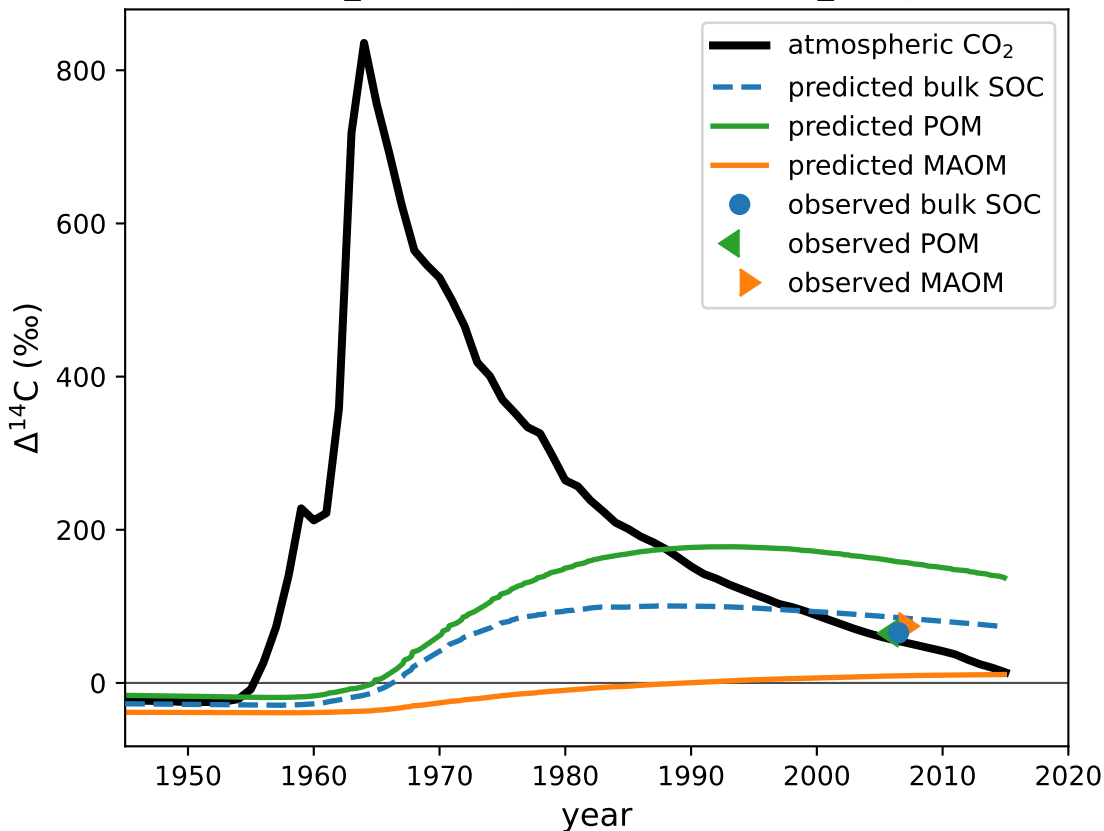

Supplement: Supplementary file 229 [file gmd-2023-242-supplement.zip]

Millennial  
Marin-Spiotta\_2008, Sierra de Cayey, 80yr secondary forest

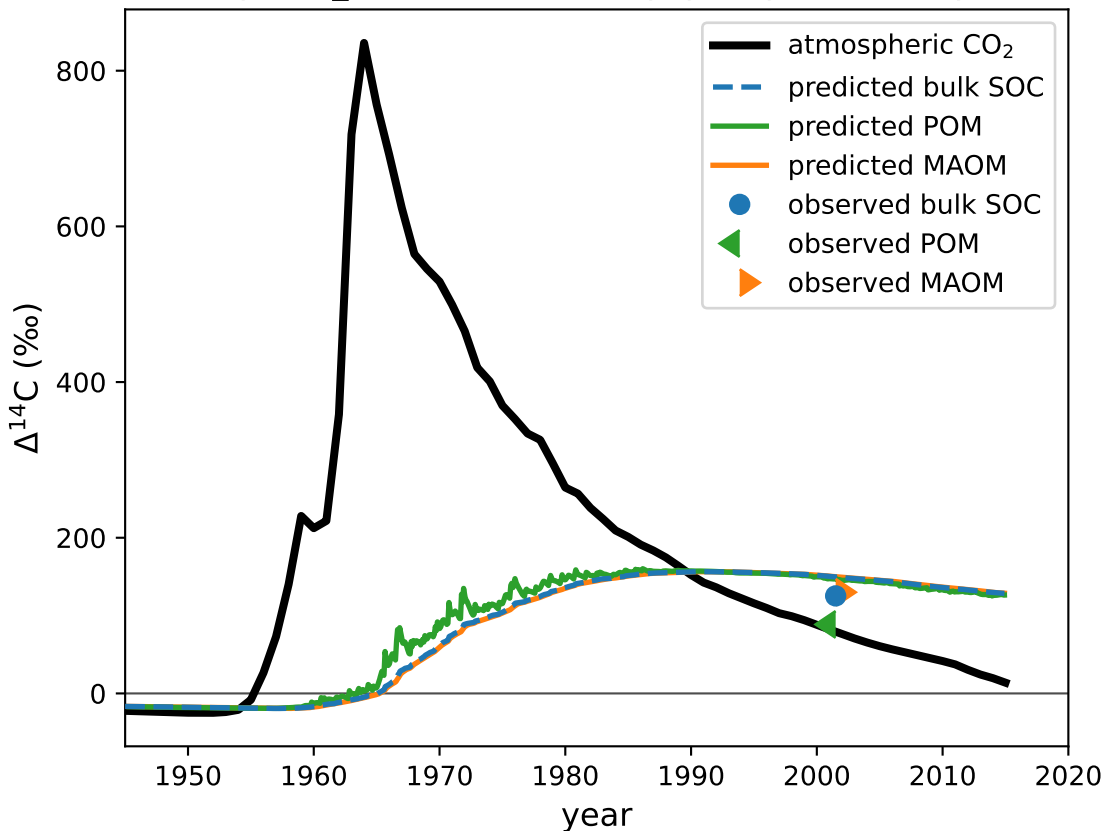

Supplement: Supplementary file 230 [file gmd-2023-242-supplement.zip]

MIMICS  
McFarlane\_2013, Mi-Fine Colonial Point, C1

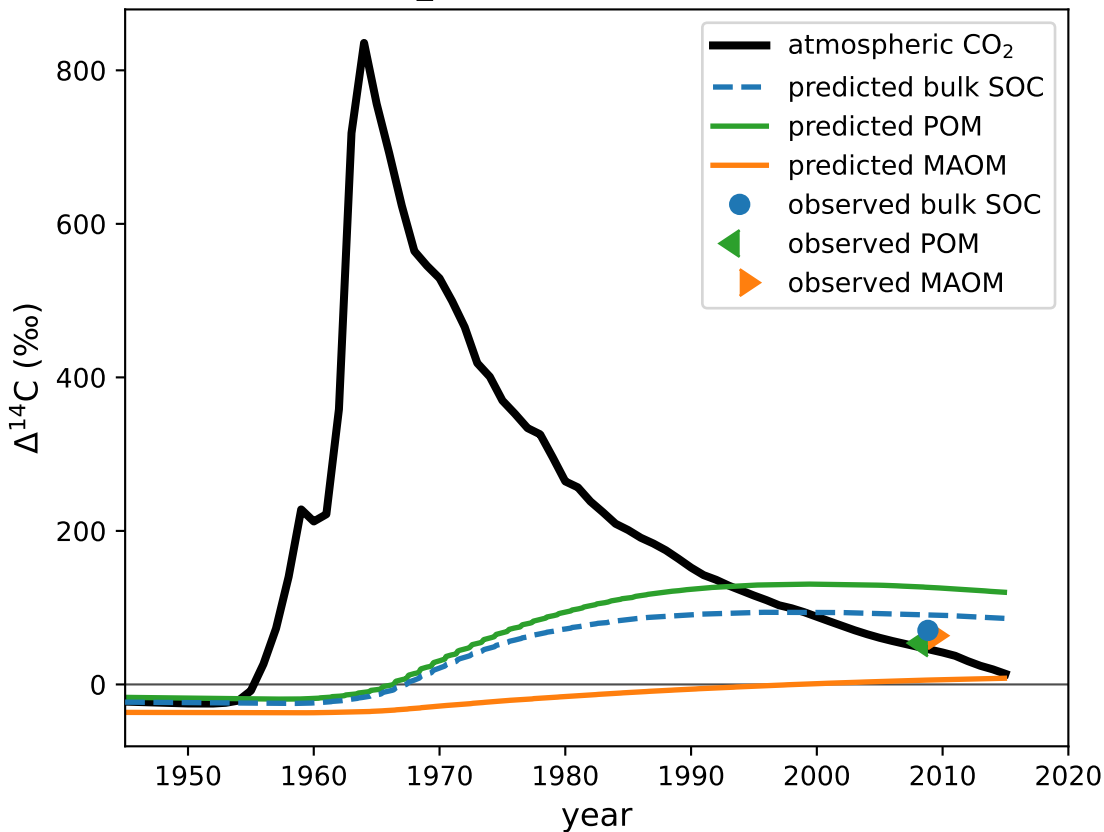

Supplement: Supplementary file 231 [file gmd-2023-242-supplement.zip]

Millennial  
Heckman\_2010, Chiricahua Rhyolite, CHRY\_composite

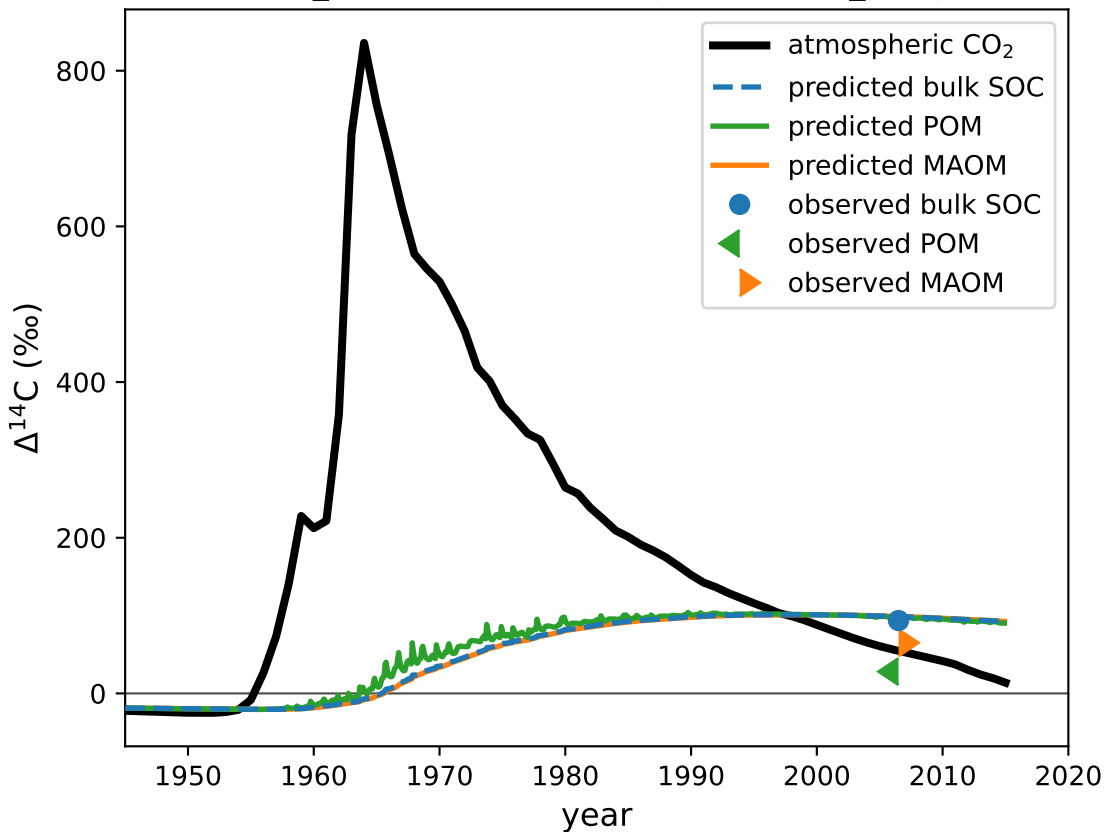

Supplement: Supplementary file 232 [file gmd-2023-242-supplement.zip]

MIMICS  
Meyer\_2012, Stubai, Pasture

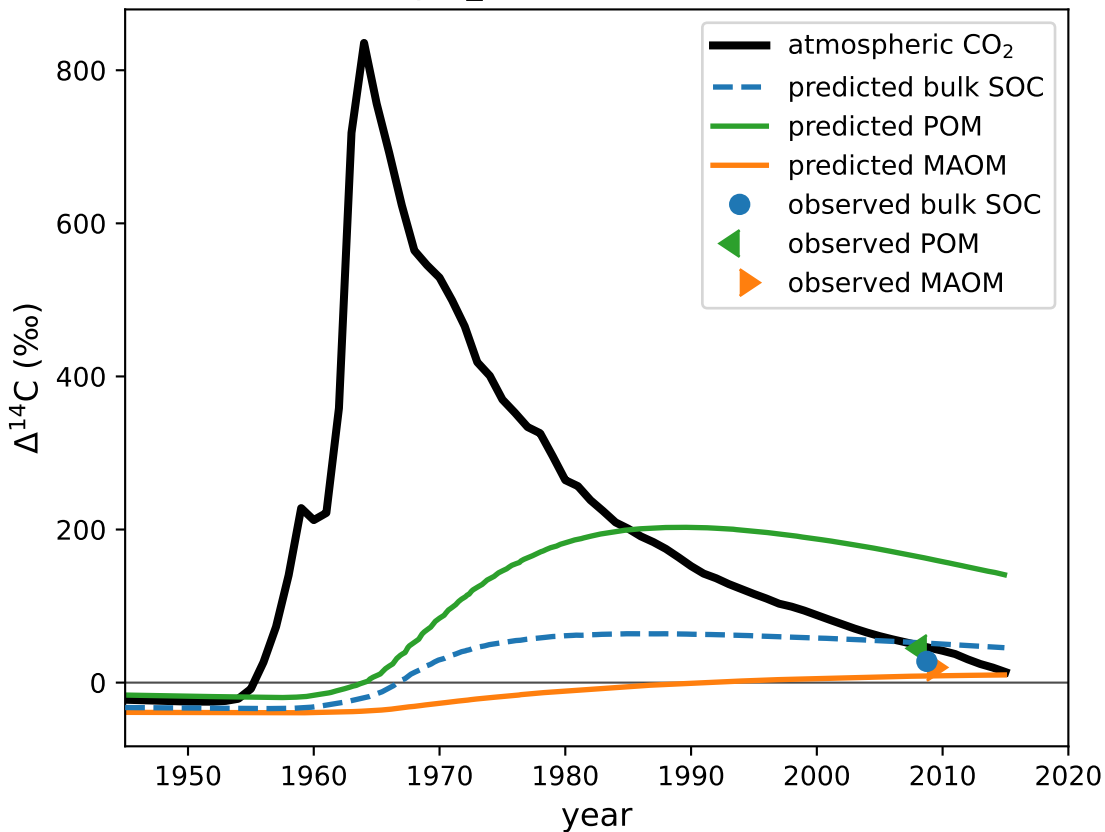

Supplement: Supplementary file 233 [file gmd-2023-242-supplement.zip]

CORPSE  
McFarlane\_2013, Mi-Fine Colonial Point, C2

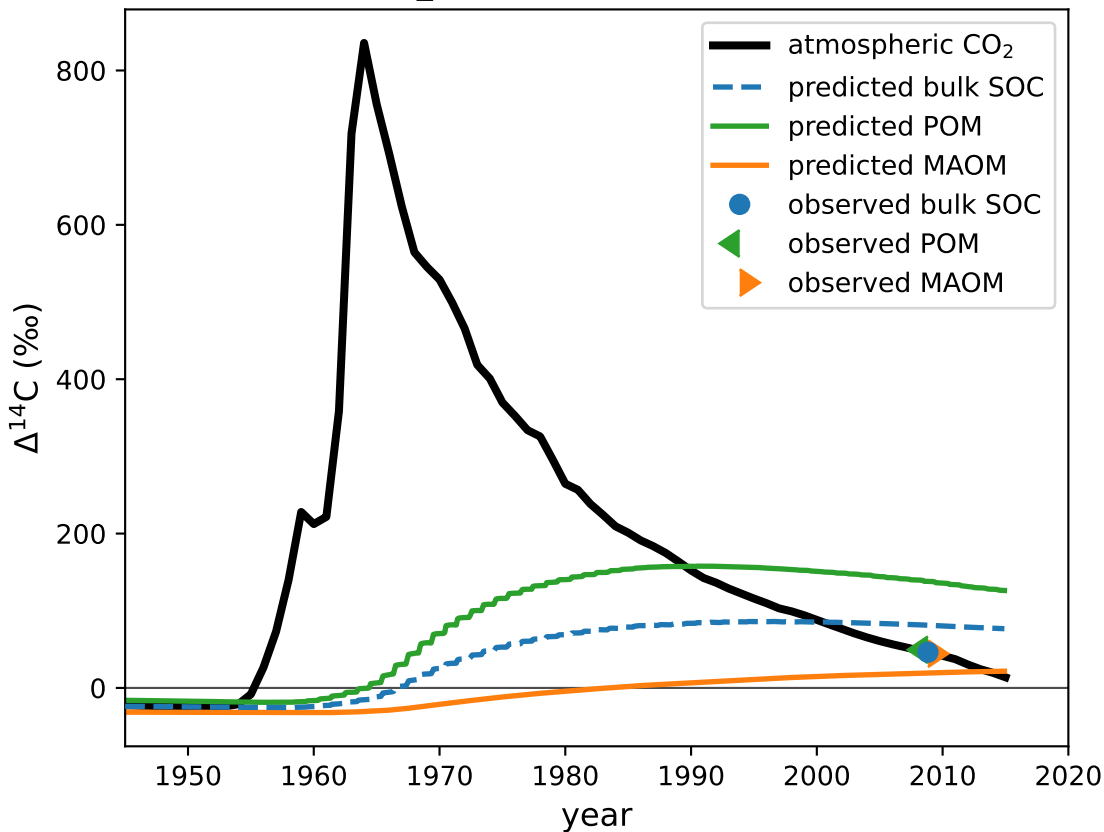

Supplement: Supplementary file 235 [file gmd-2023-242-supplement.zip]

Millennial  
Schrumpf\_2013, Hesse, Hesse.1

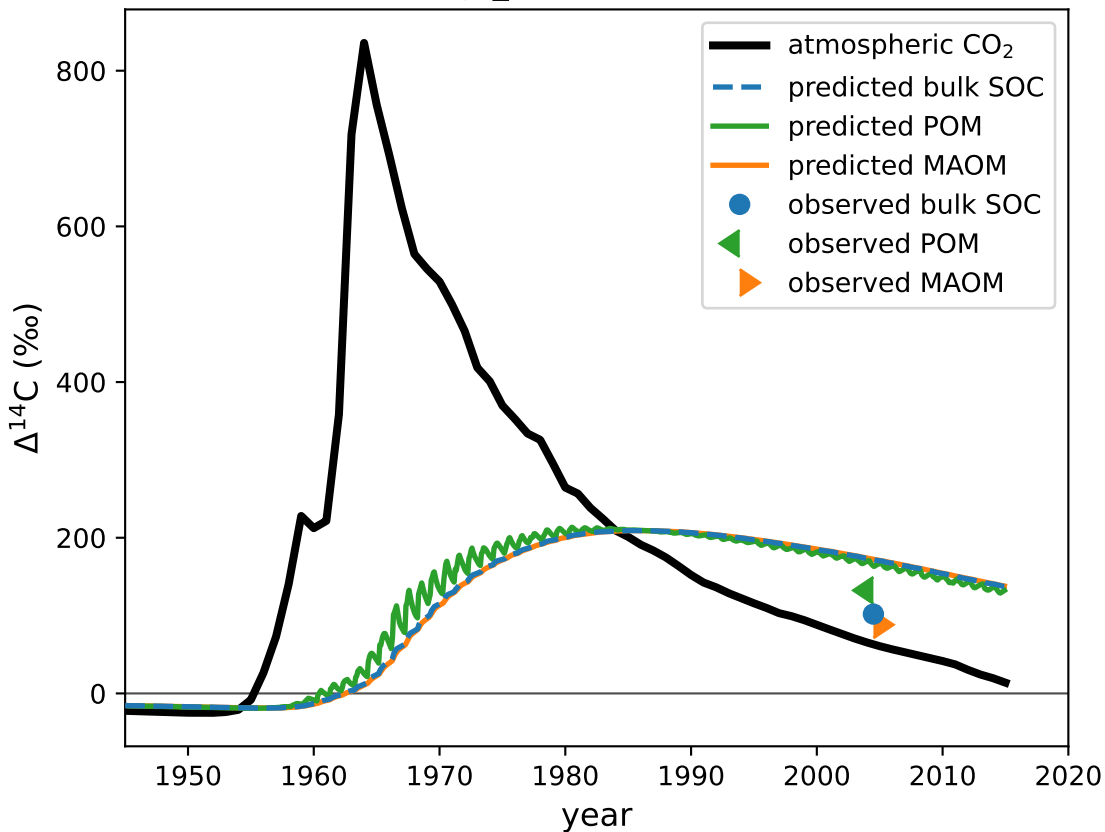

Supplement: Supplementary file 236 [file gmd-2023-242-supplement.zip]

MIMICS  
McFarlane\_2013, MI-Coarse UMBS, D4

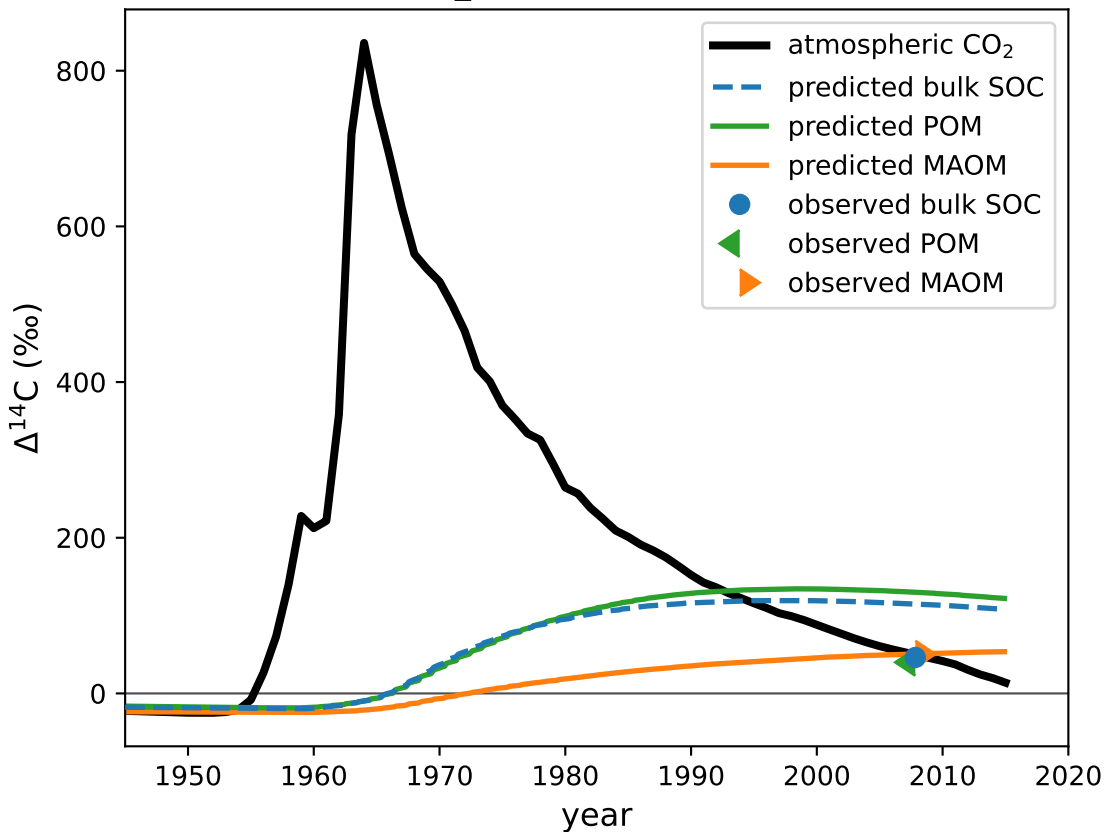

Supplement: Supplementary file 237 [file gmd-2023-242-supplement.zip]

MIMICS  
Schrumpf\_2013, Wetzstein, Wetzstein.1

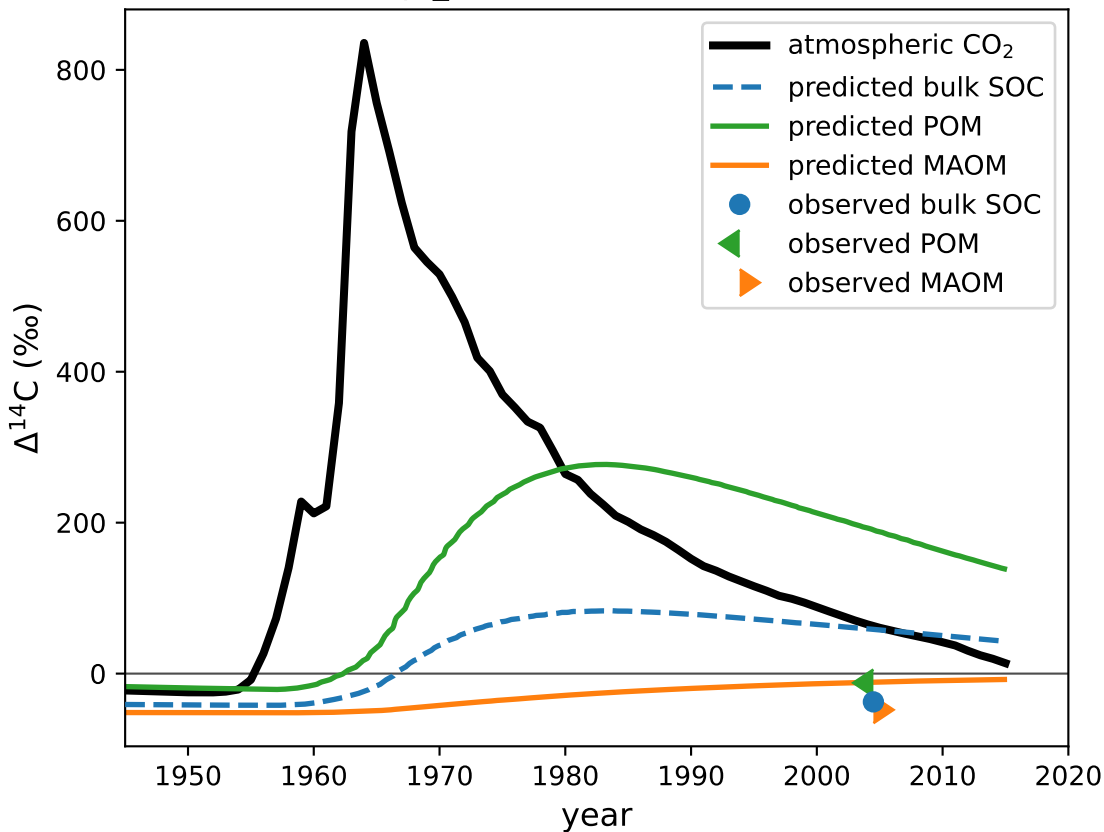

Supplement: Supplementary file 238 [file gmd-2023-242-supplement.zip]

CORPSE  
Lybrand\_2017, Catalina CZO conifer, mixed conifer\_divergent

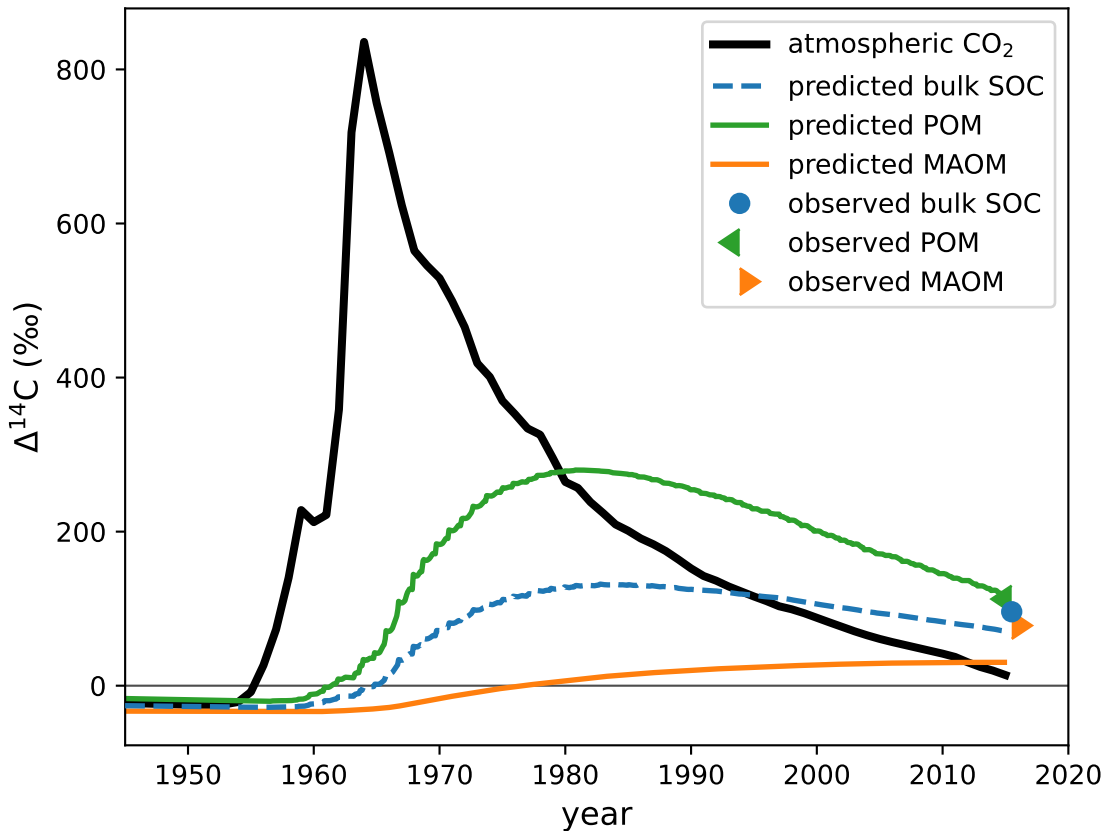

Supplement: Supplementary file 239 [file gmd-2023-242-supplement.zip]

MIMICS  
Berhe\_2012, Tennessee Valley, hollow comp

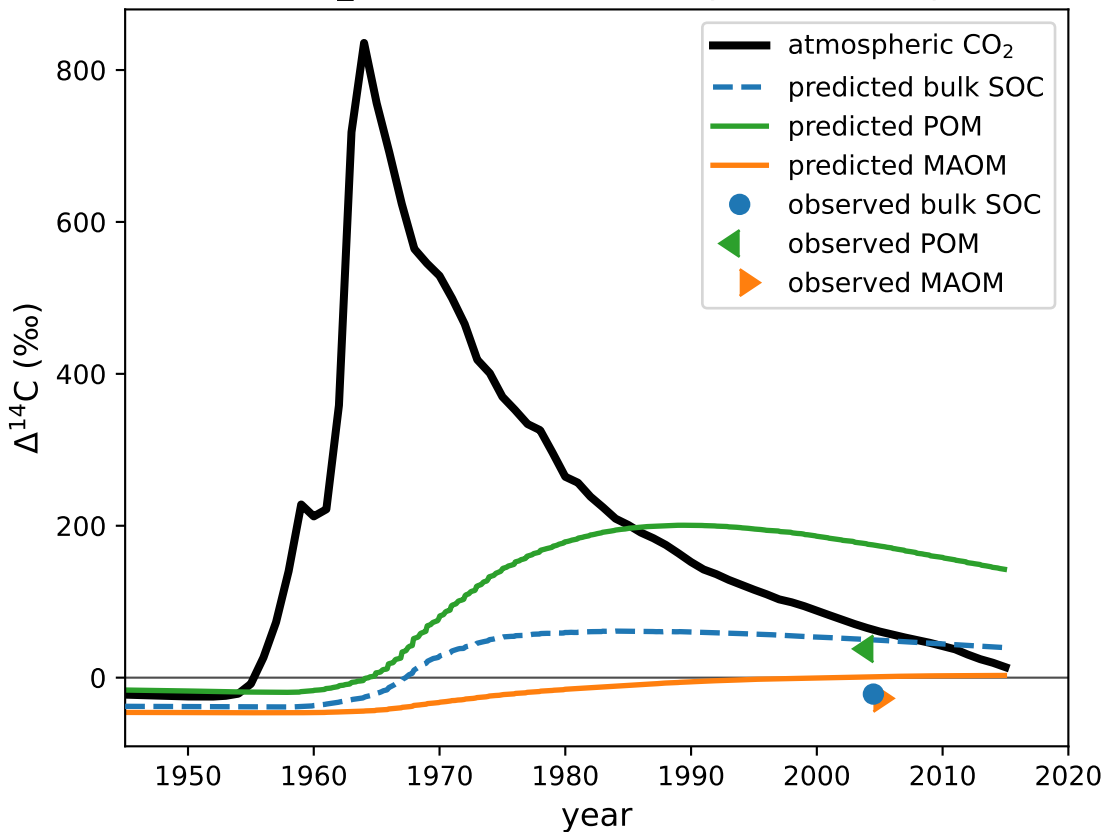

Supplement: Supplementary file 240 [file gmd-2023-242-supplement.zip]

Millennial  
McFarlane\_2013, NH Bartlett Forest, B2

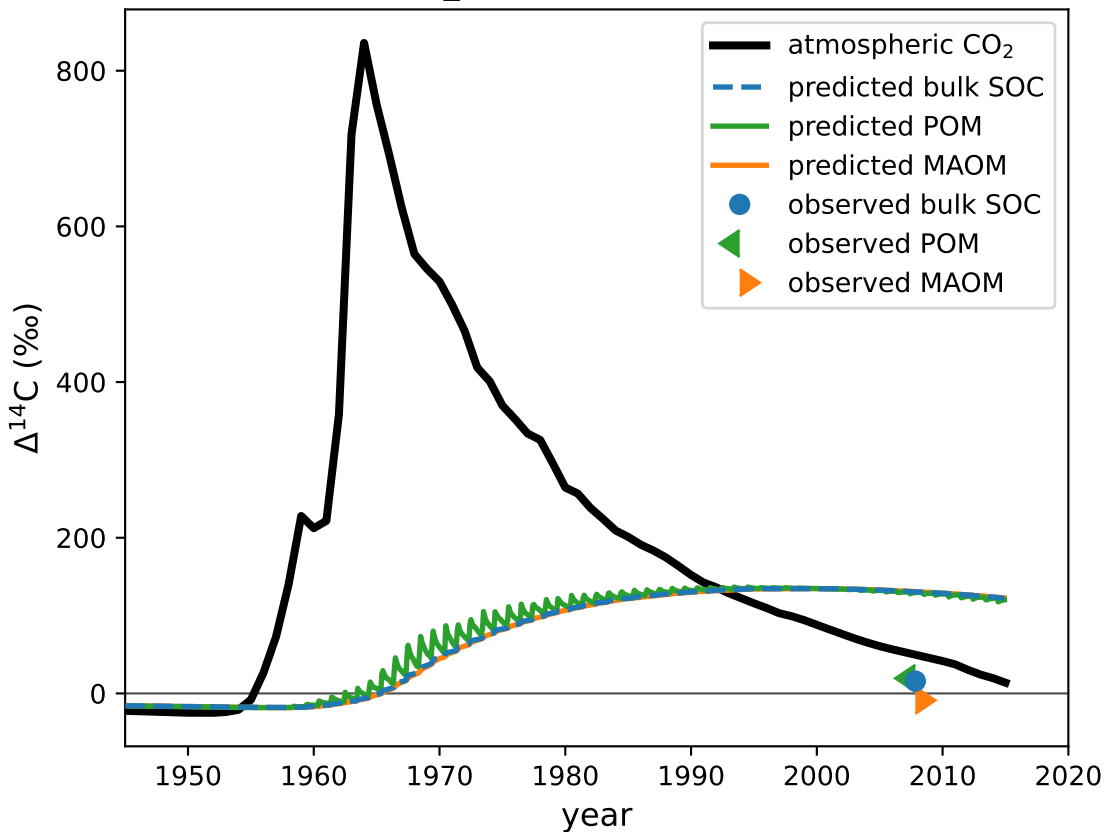

Supplement: Supplementary file 242 [file gmd-2023-242-supplement.zip]

Millennial  
Berhe\_2012, Tennessee Valley, plain comp

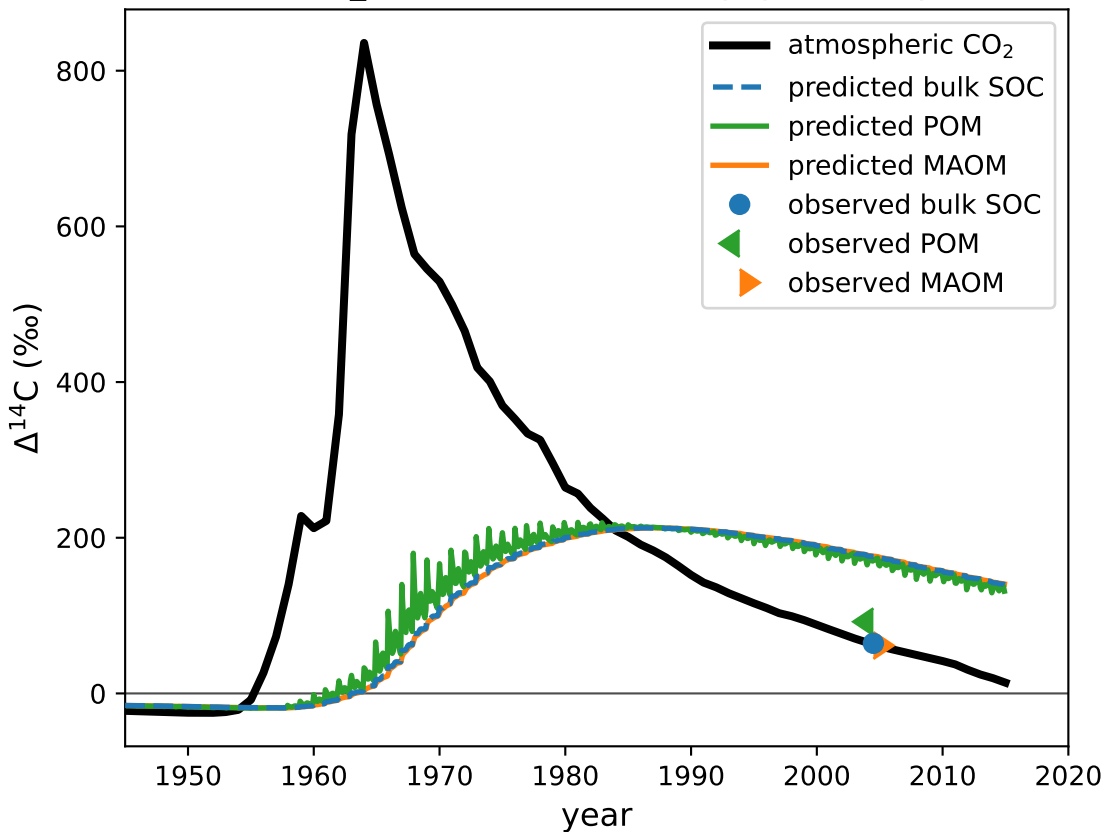

Supplement: Supplementary file 243 [file gmd-2023-242-supplement.zip]

MEND  
Heckman\_2018, AZ\_Mollisol, Basalt

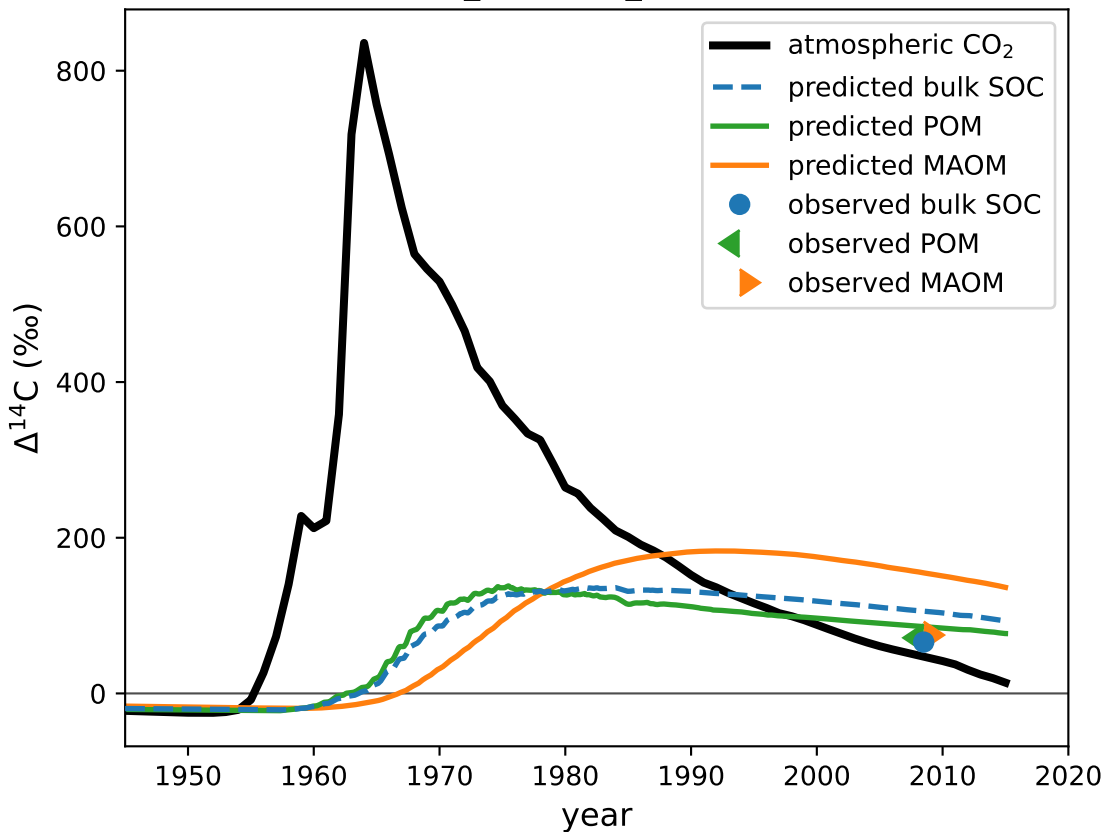

Supplement: Supplementary file 244 [file gmd-2023-242-supplement.zip]

CORPSE  
Meyer\_2012, Matsch, Pasture

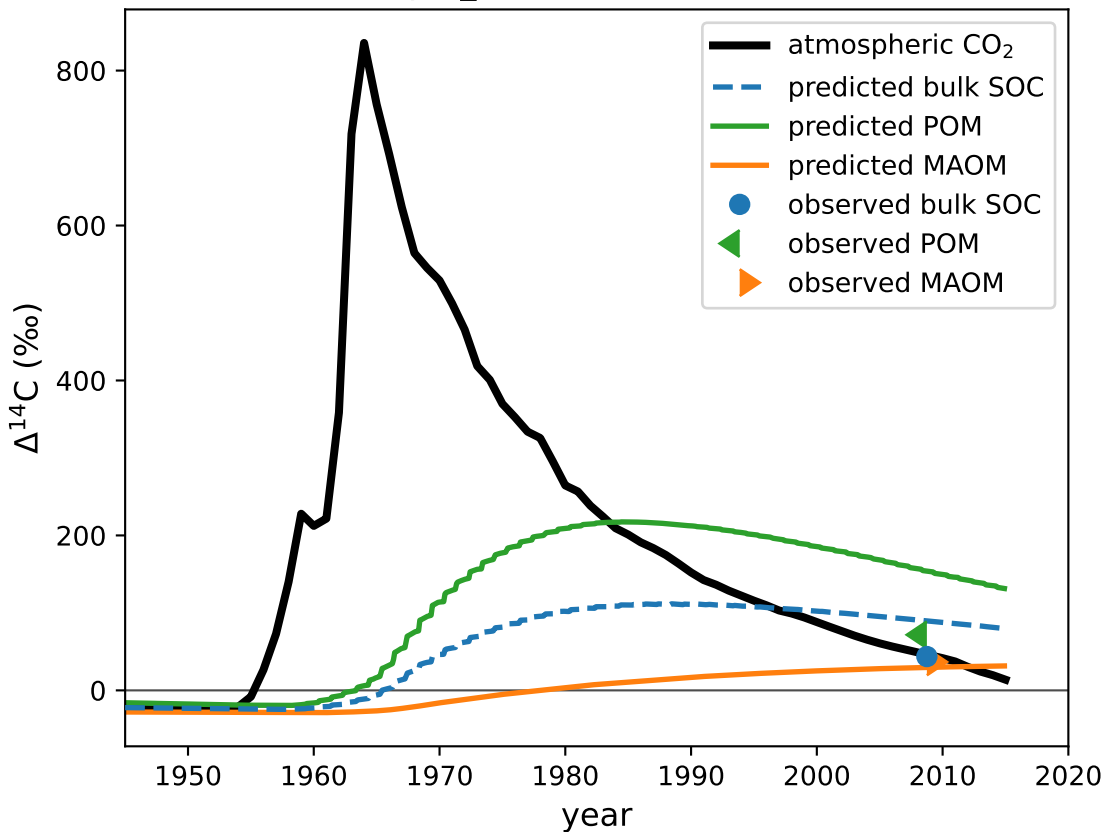

Supplement: Supplementary file 245 [file gmd-2023-242-supplement.zip]

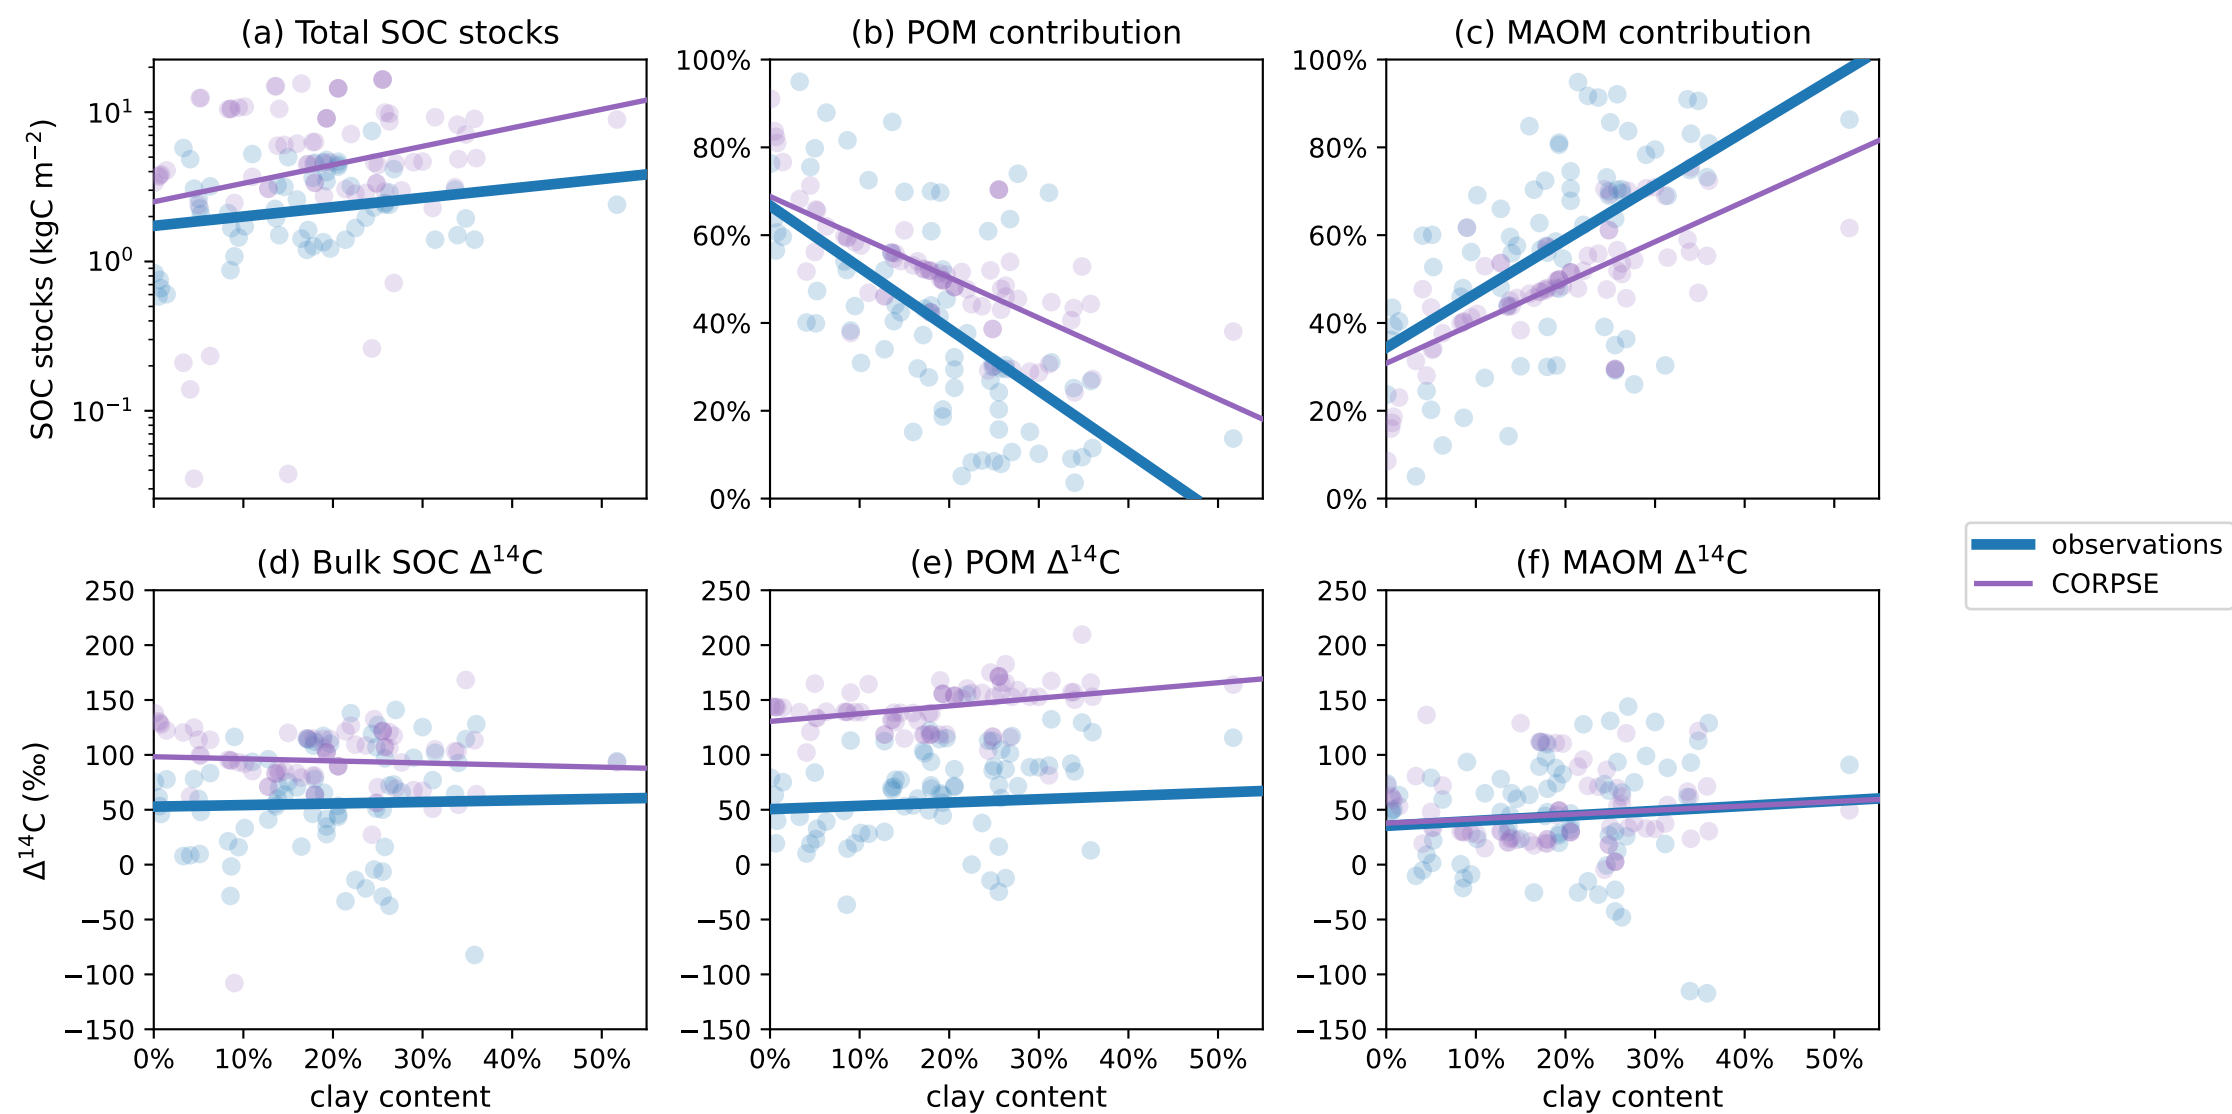

Supplement: Supplementary file 246 [file gmd-2023-242-supplement.zip]

MEND  
McFarlane\_2013, MA Harvard Forest, H3

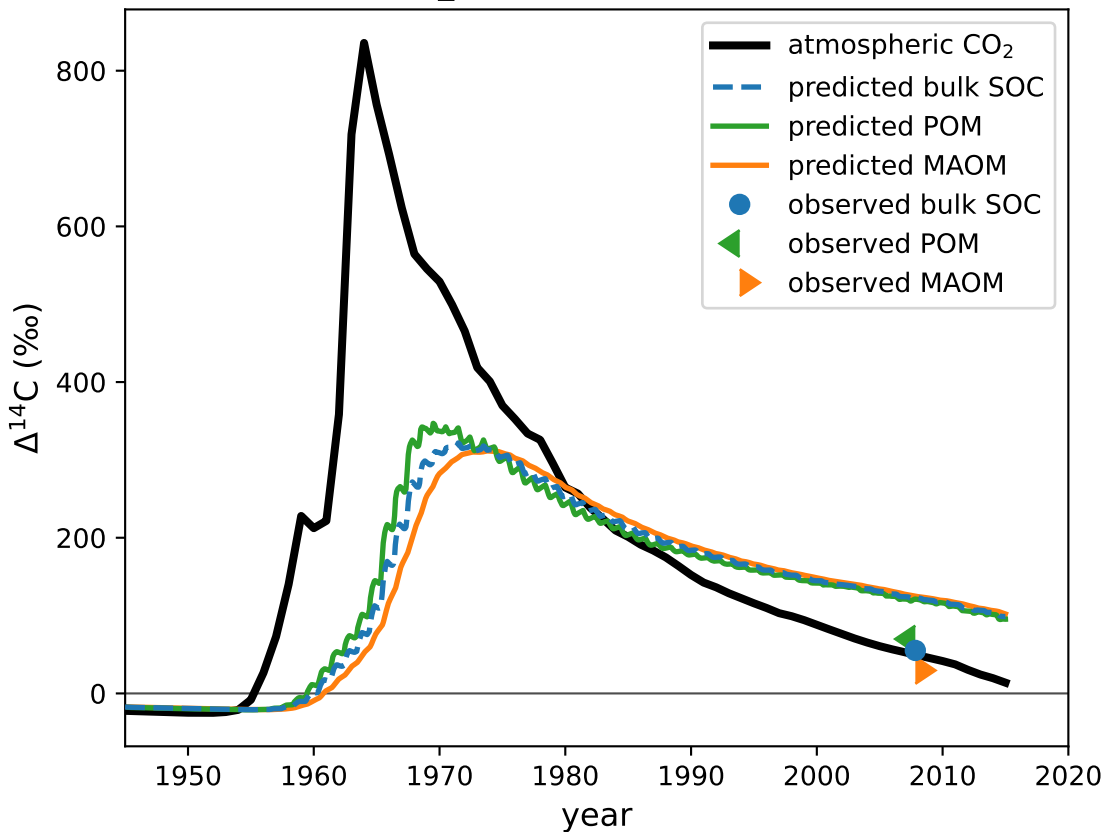

Supplement: Supplementary file 247 [file gmd-2023-242-supplement.zip]

SOMic  
Baisden\_2002, China Hat, ChinaHat.1978

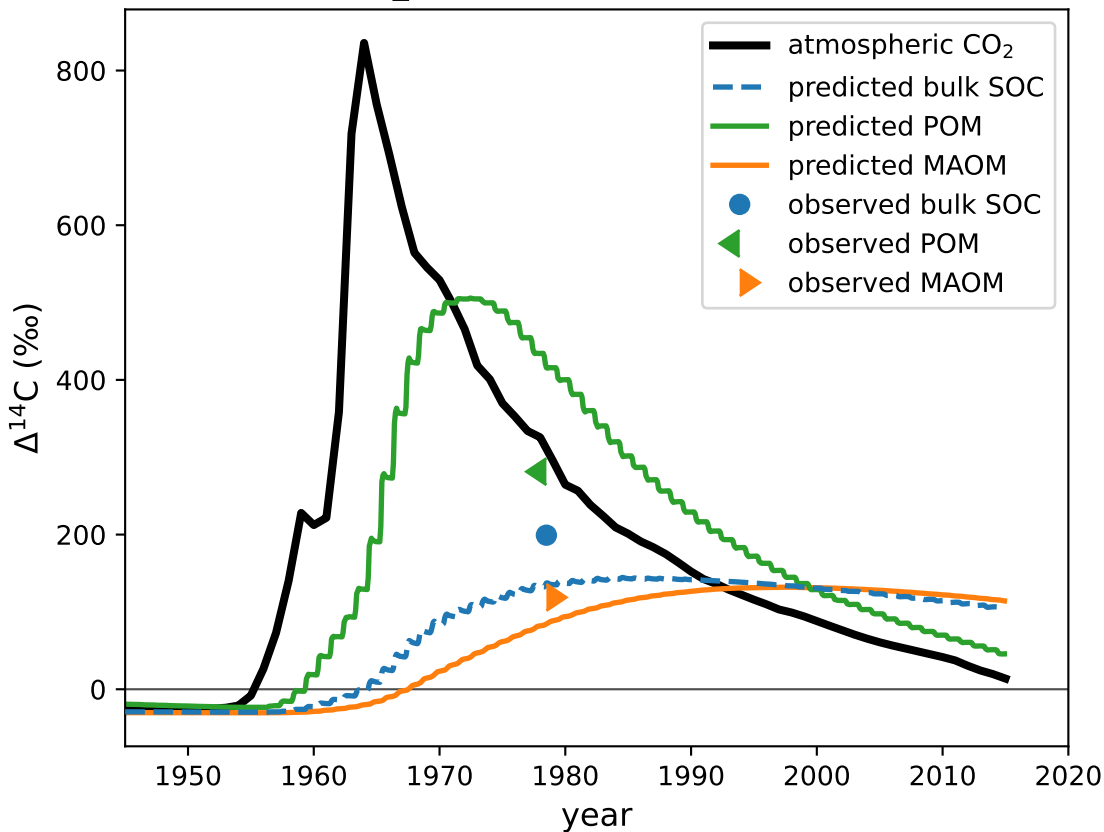

Supplement: Supplementary file 248 [file gmd-2023-242-supplement.zip]

Millennial  
Rasmussen\_2018, BSrf, BSrf

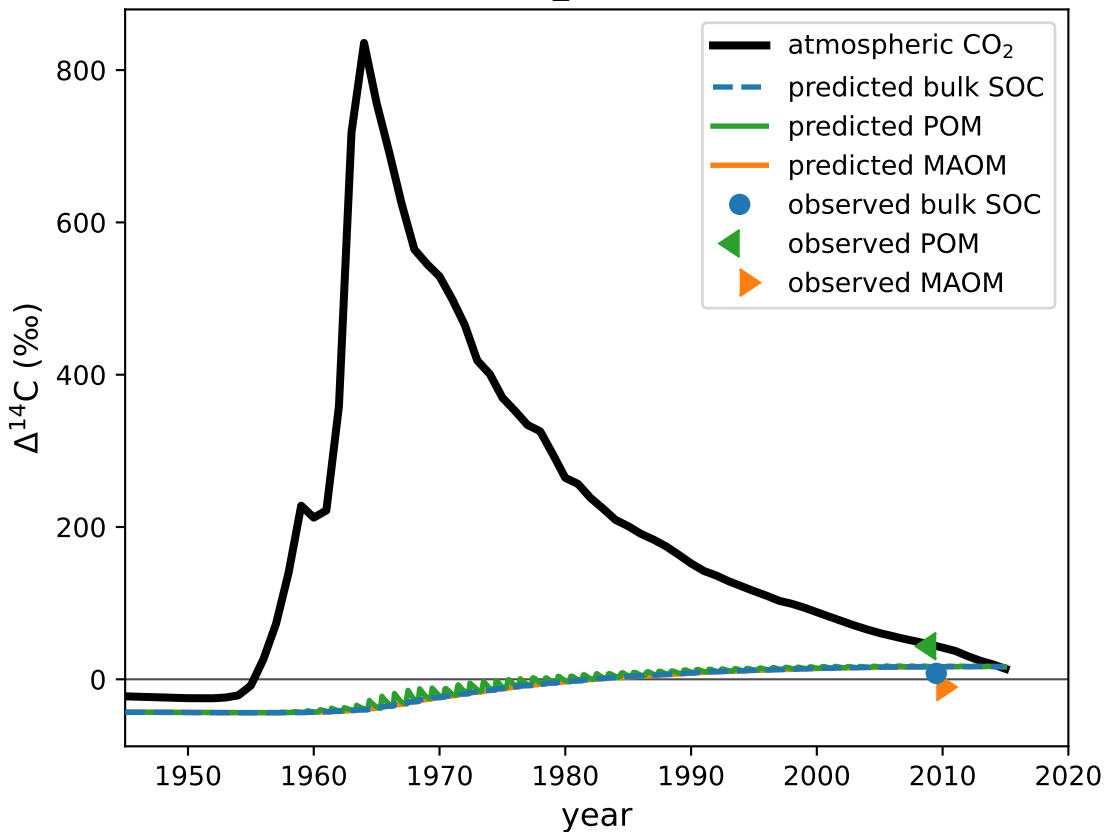

Supplement: Supplementary file 249 [file gmd-2023-242-supplement.zip]

CORPSE  
Berhe\_2012, Tennessee Valley, summit comp

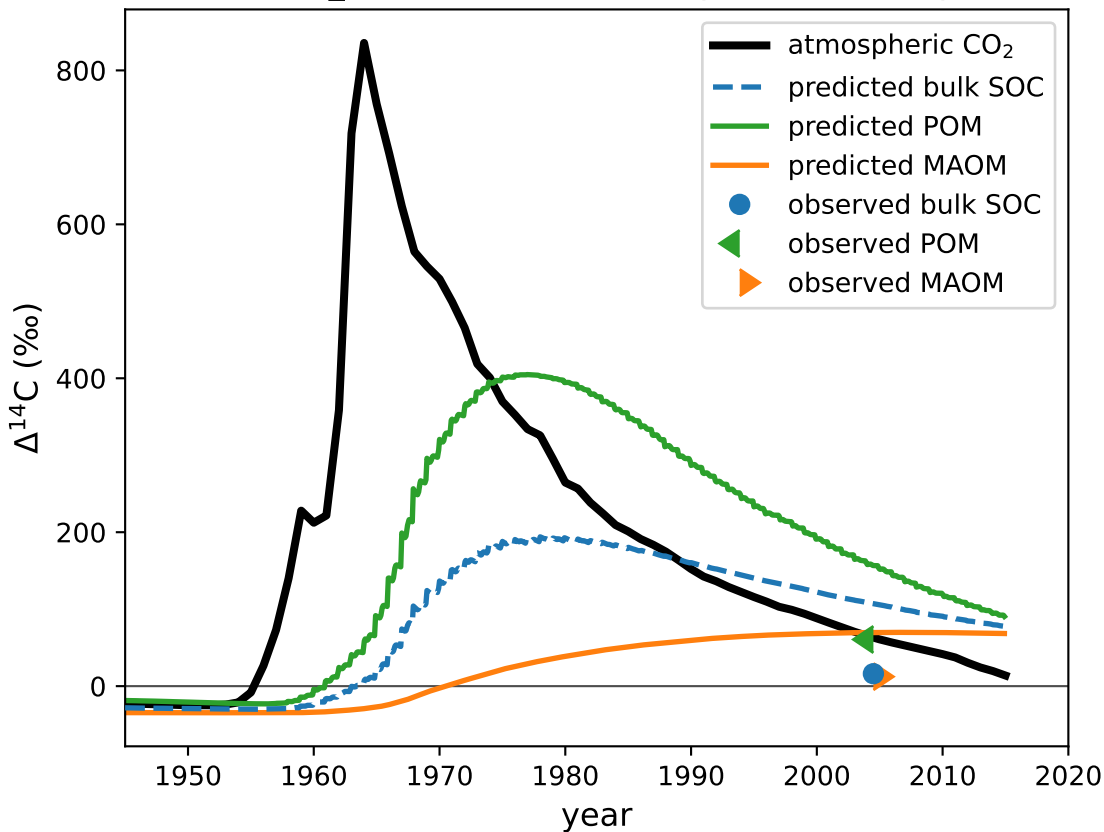

Supplement: Supplementary file 250 [file gmd-2023-242-supplement.zip]

CORPSE  
McFarlane\_2013, Mi-Fine Colonial Point, C5

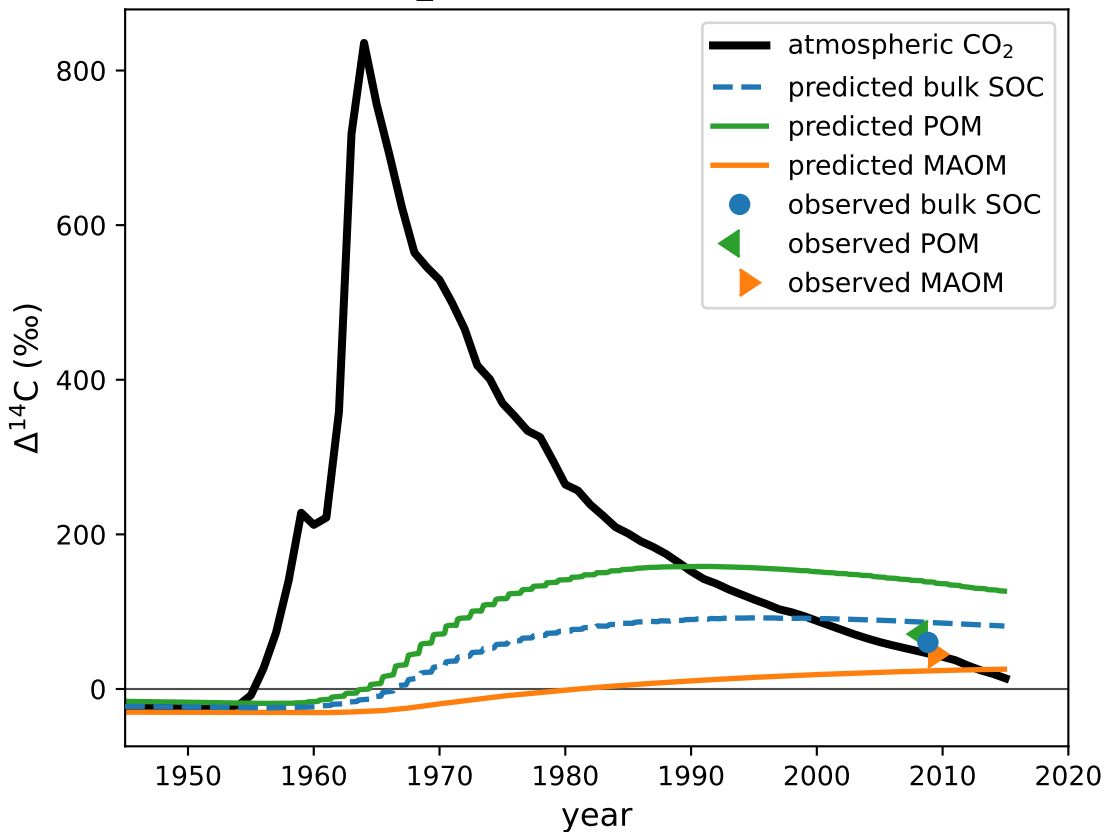

Supplement: Supplementary file 251 [file gmd-2023-242-supplement.zip]

SOMic  
Schrumpf\_2013, Easter Bush, Easter Bush.1

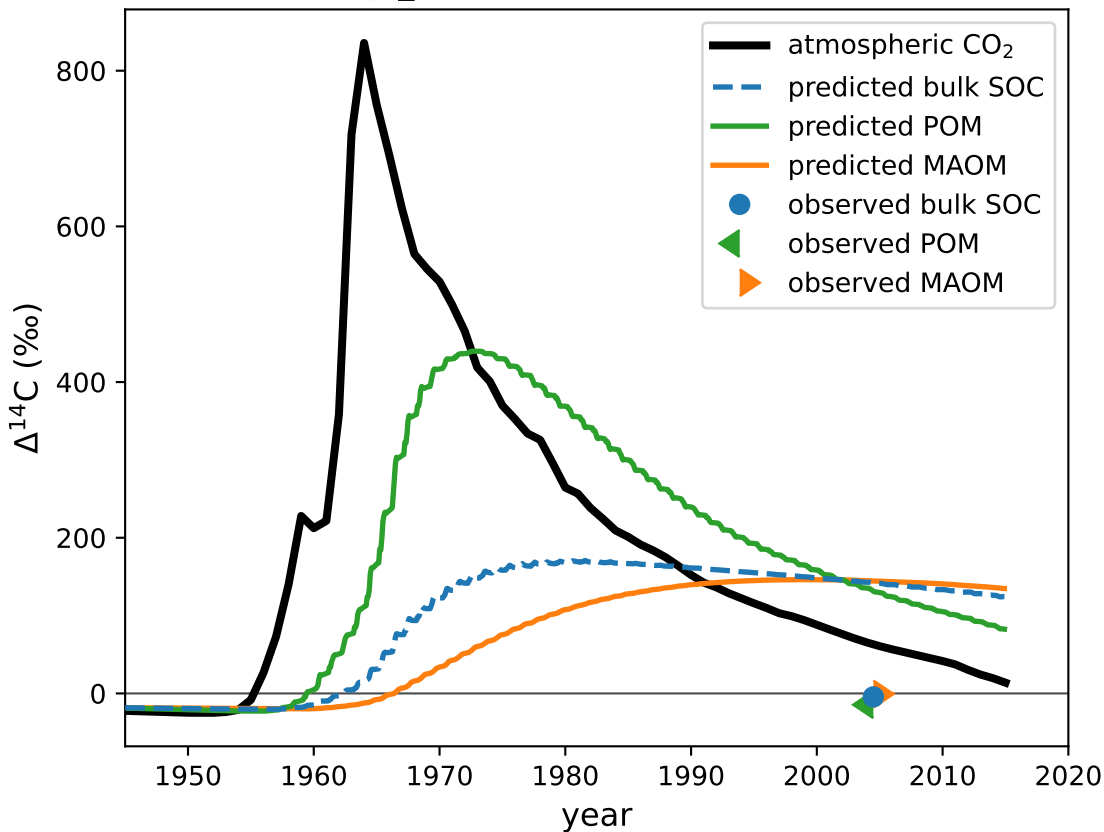

Supplement: Supplementary file 252 [file gmd-2023-242-supplement.zip]

CORPSE  
McFarlane\_2013, MA Harvard Forest, H4

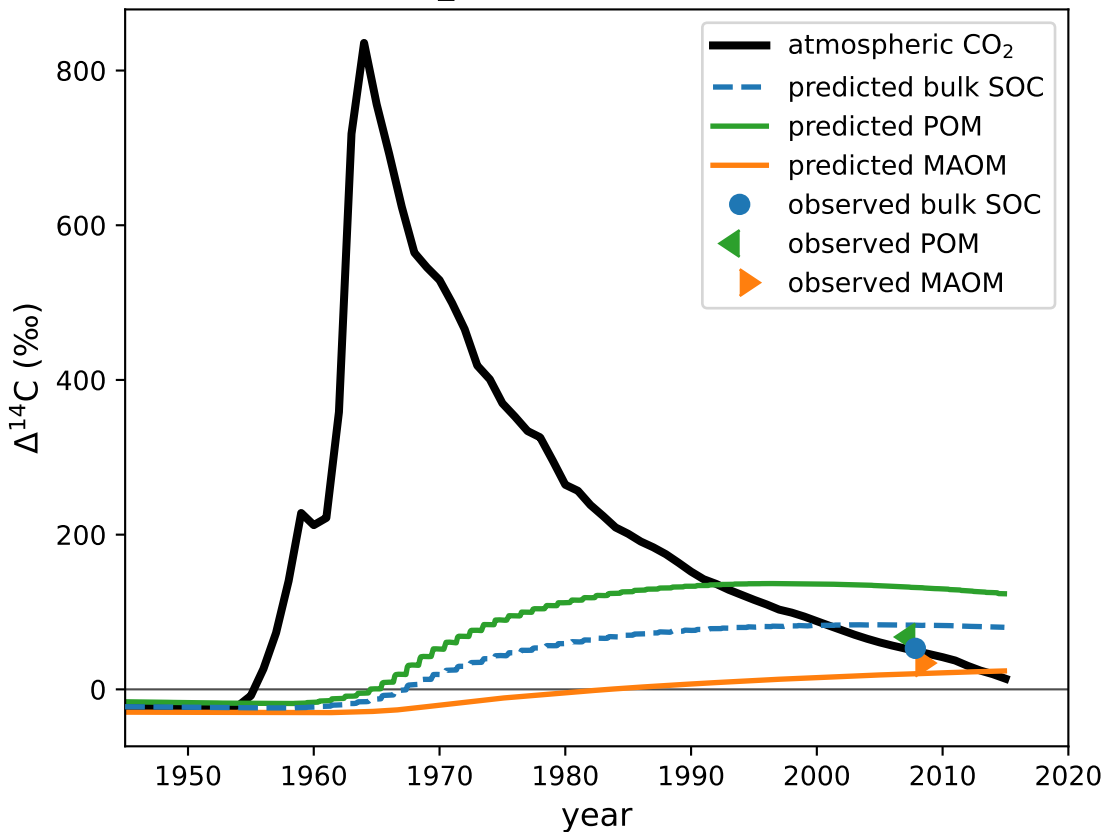

Supplement: Supplementary file 253 [file gmd-2023-242-supplement.zip]

MIMICS  
McFarlane\_2013, MA Harvard Forest, H2

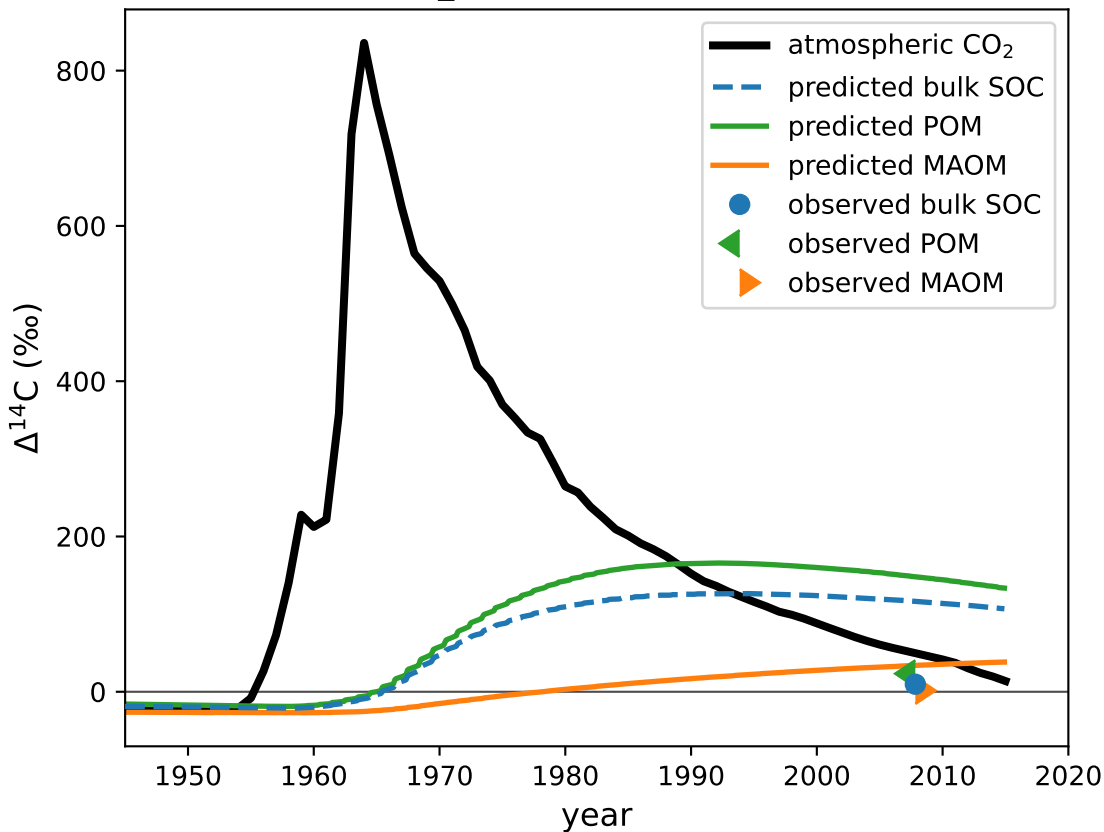

Supplement: Supplementary file 255 [file gmd-2023-242-supplement.zip]

SOMic  
Meyer\_2012, Stubai, Abandoned

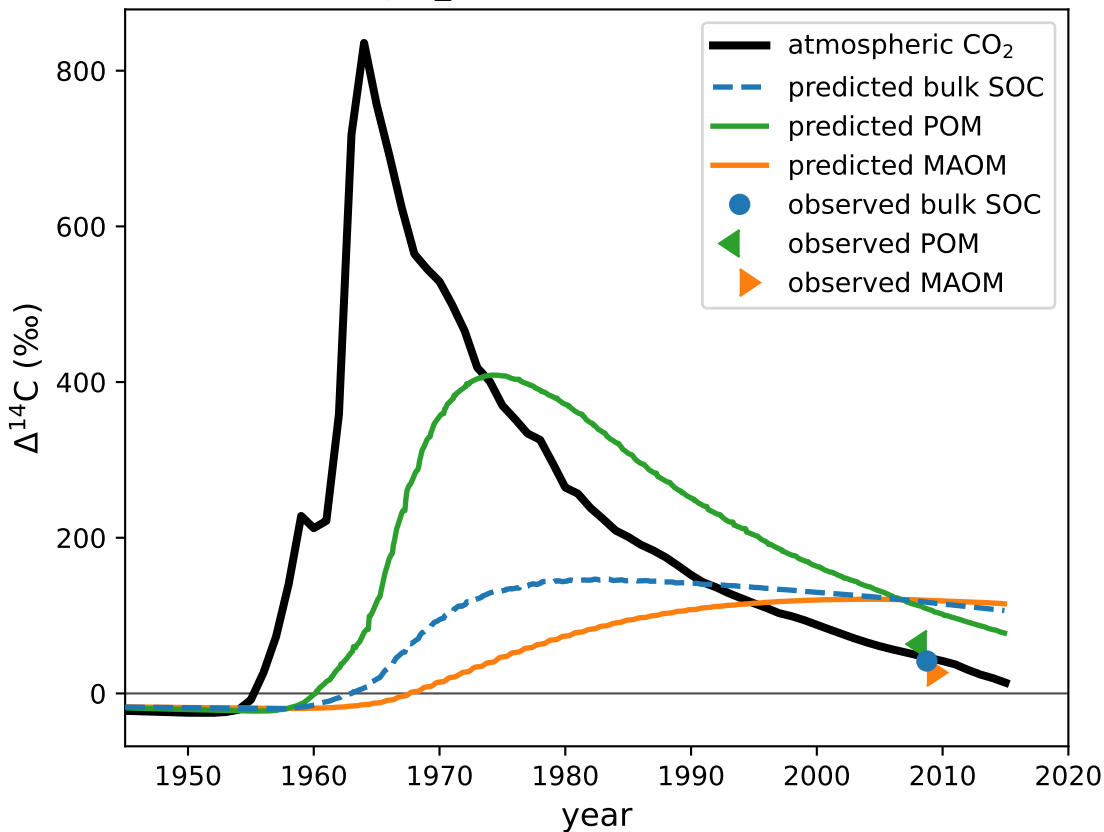

Supplement: Supplementary file 256 [file gmd-2023-242-supplement.zip]

SOMic  
McFarlane\_2013, MO Ozark BREA, M2

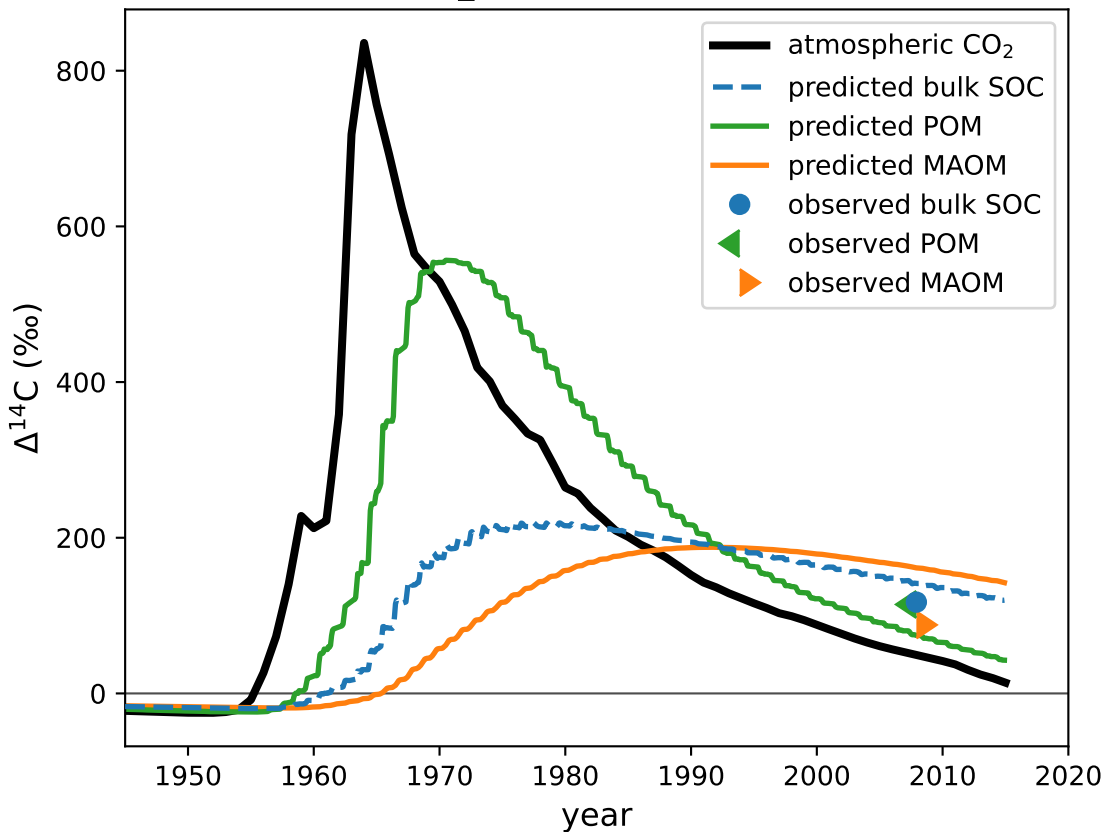

Supplement: Supplementary file 257 [file gmd-2023-242-supplement.zip]

Millennial  
Marin-Spiotta\_2008, Sierra de Cayey, 20yr secondary forest

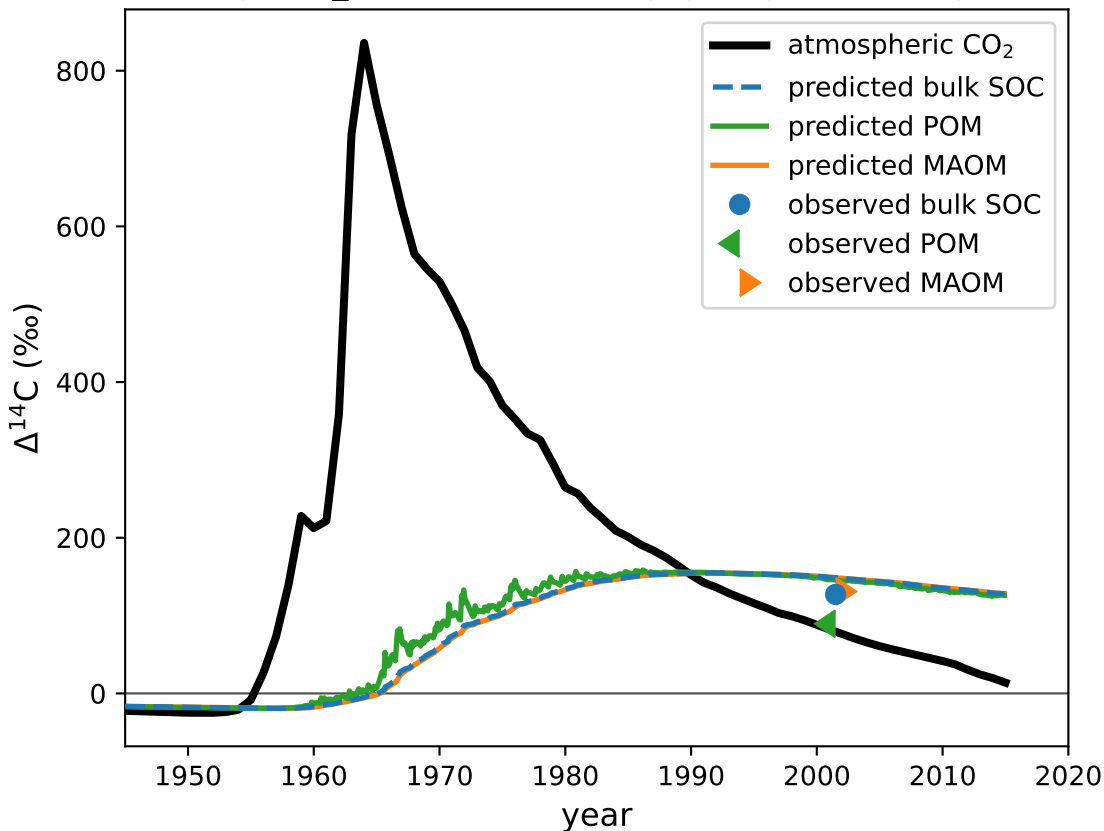

Supplement: Supplementary file 258 [file gmd-2023-242-supplement.zip]

Millennial  
Marin-Spiotta\_2008, Sierra de Cayey, Primary forest

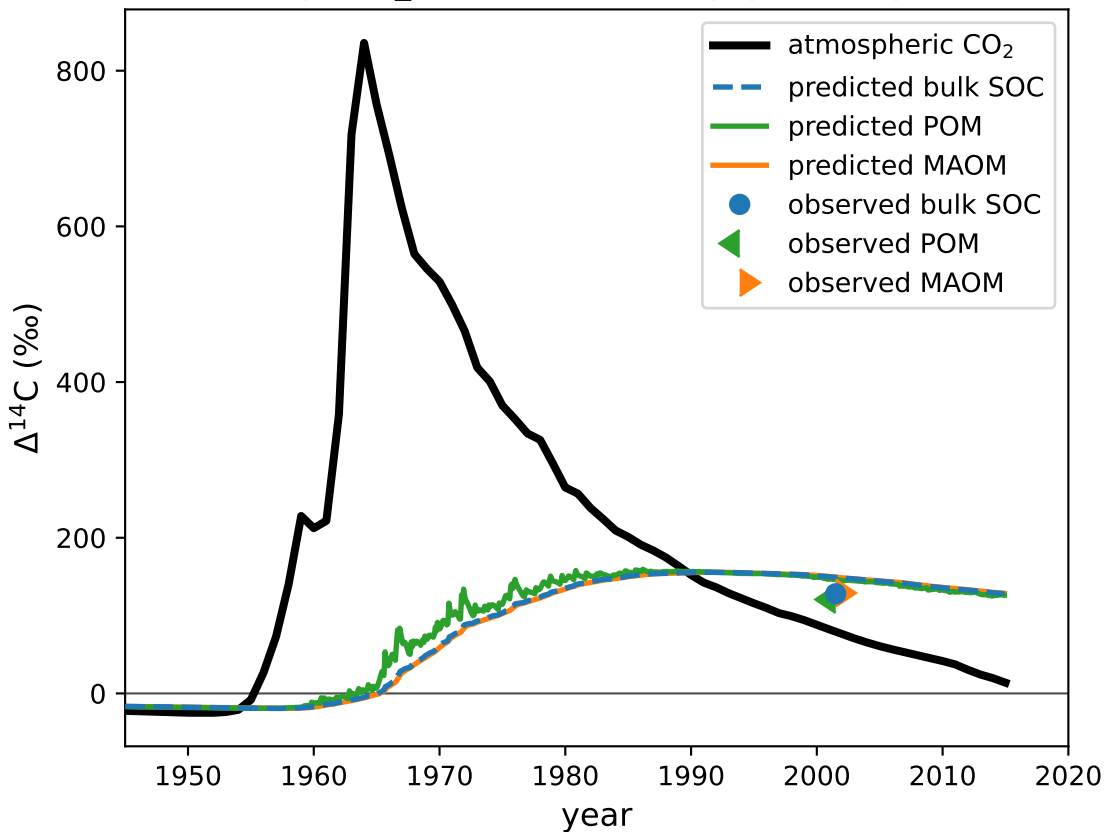

Supplement: Supplementary file 259 [file gmd-2023-242-supplement.zip]

MIMICS  
Schrumpf\_2013, Hainich, Hainich.1

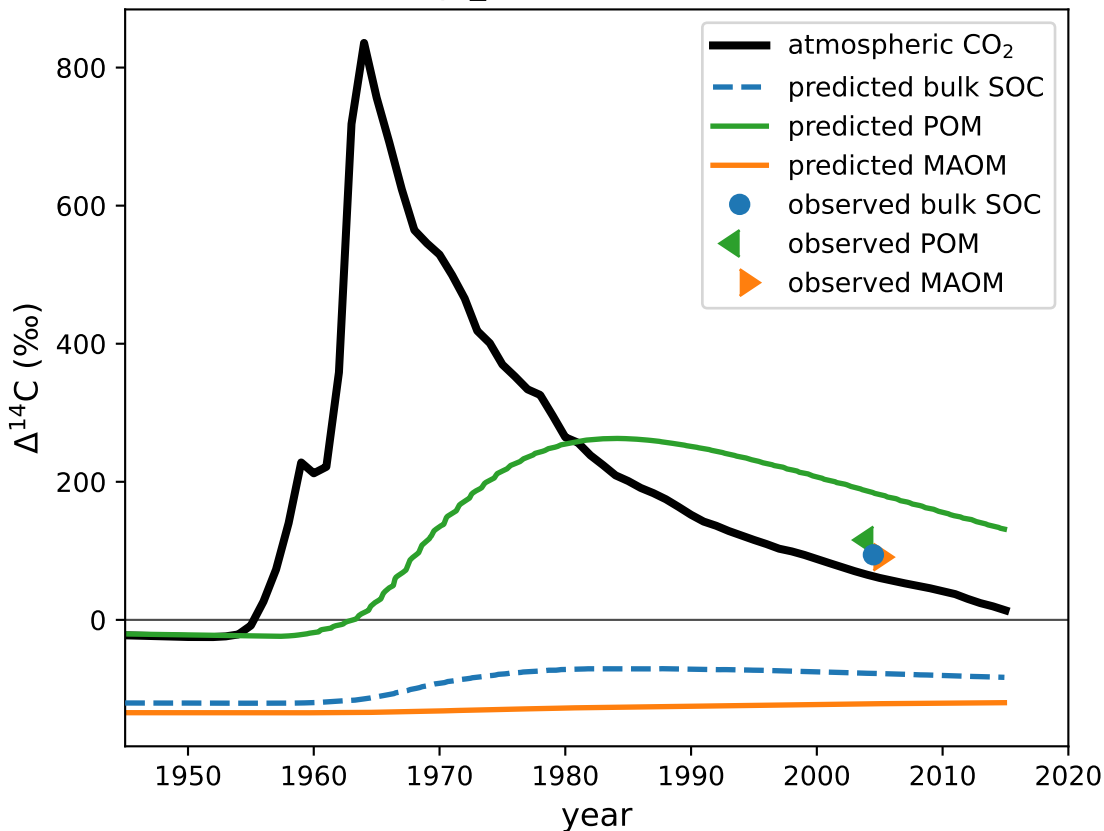

Supplement: Supplementary file 261 [file gmd-2023-242-supplement.zip]

MIMICS  
Meyer\_2012, Matsch, Pasture

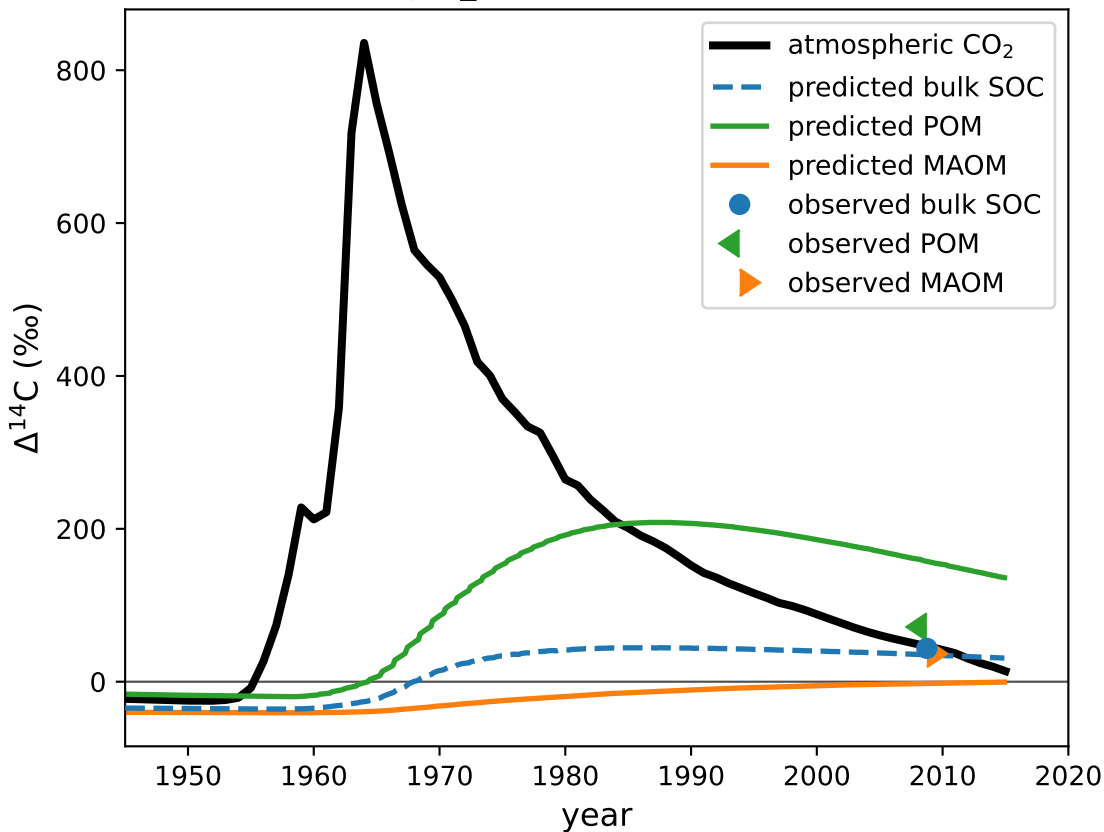

Supplement: Supplementary file 262 [file gmd-2023-242-supplement.zip]

SOMic  
Rasmussen\_2018, ANpp, ANpp

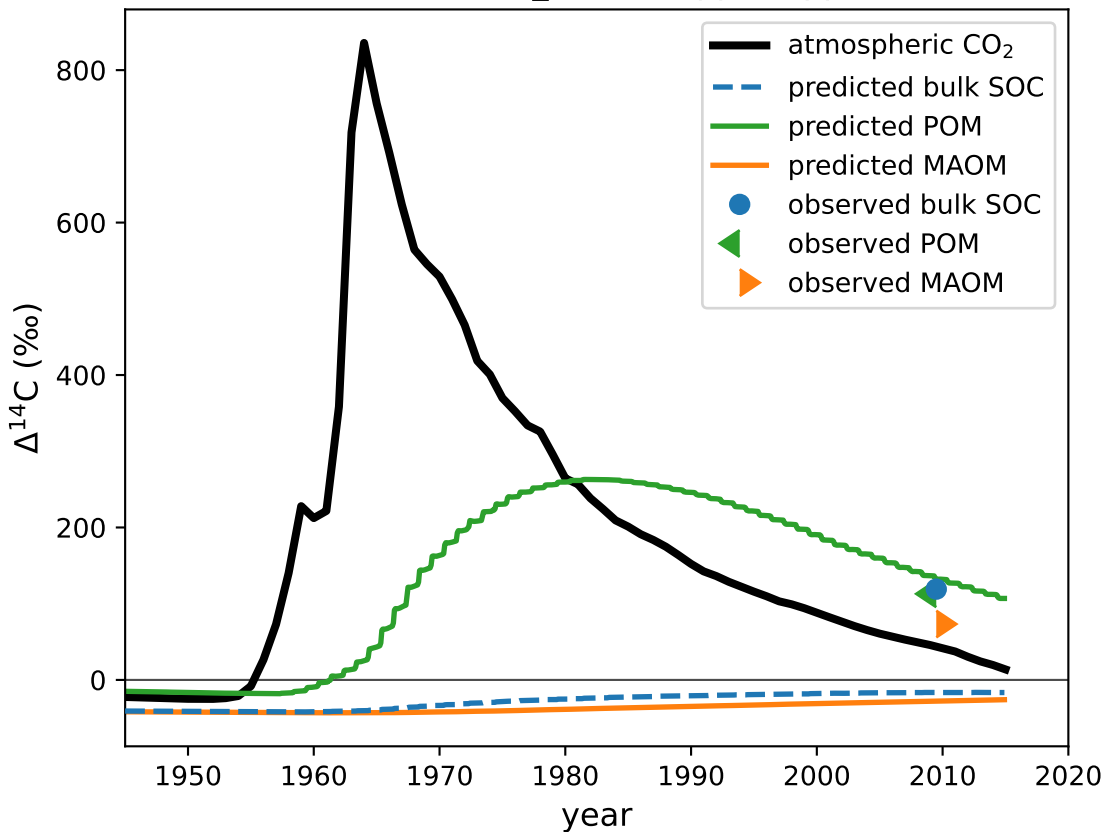

Supplement: Supplementary file 263 [file gmd-2023-242-supplement.zip]

SOMic

Lybrand\_2017, Catalina CZO conifer, mixed conifer\_convergent

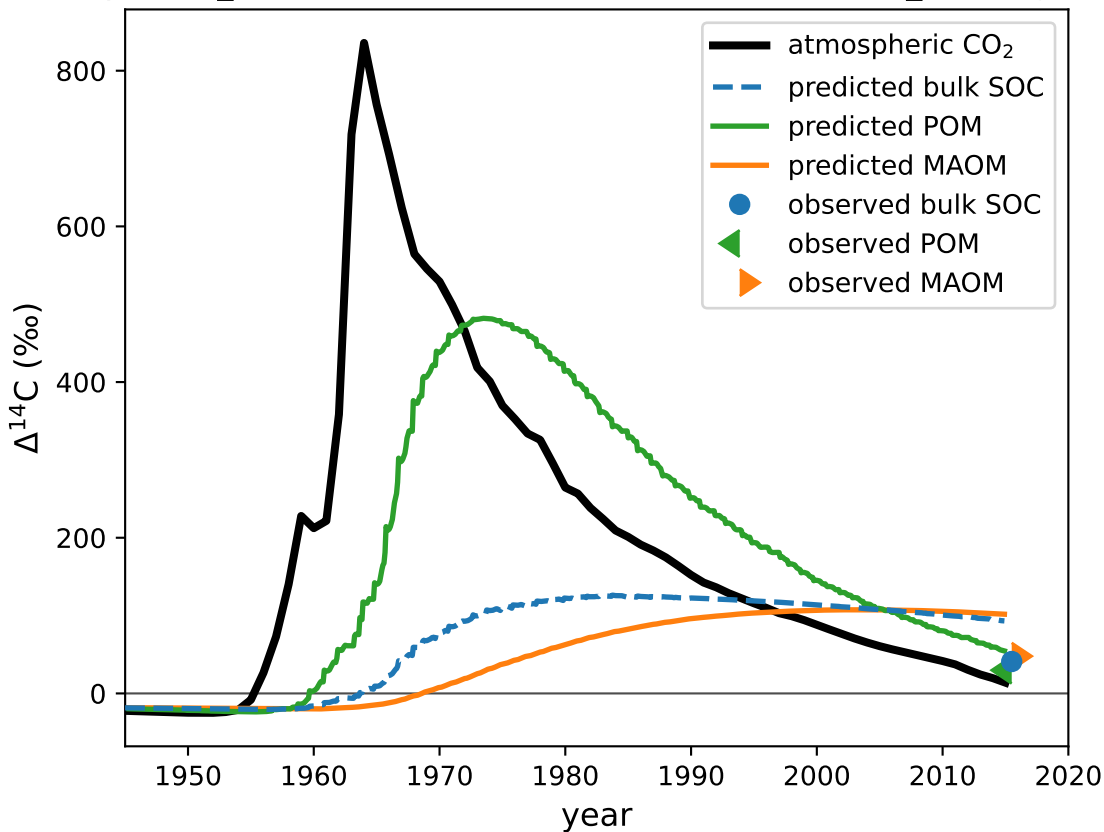

Supplement: Supplementary file 264 [file gmd-2023-242-supplement.zip]

CORPSE  
Heckman\_2010, Chiricahua Rhyolite, CHRY\_composite

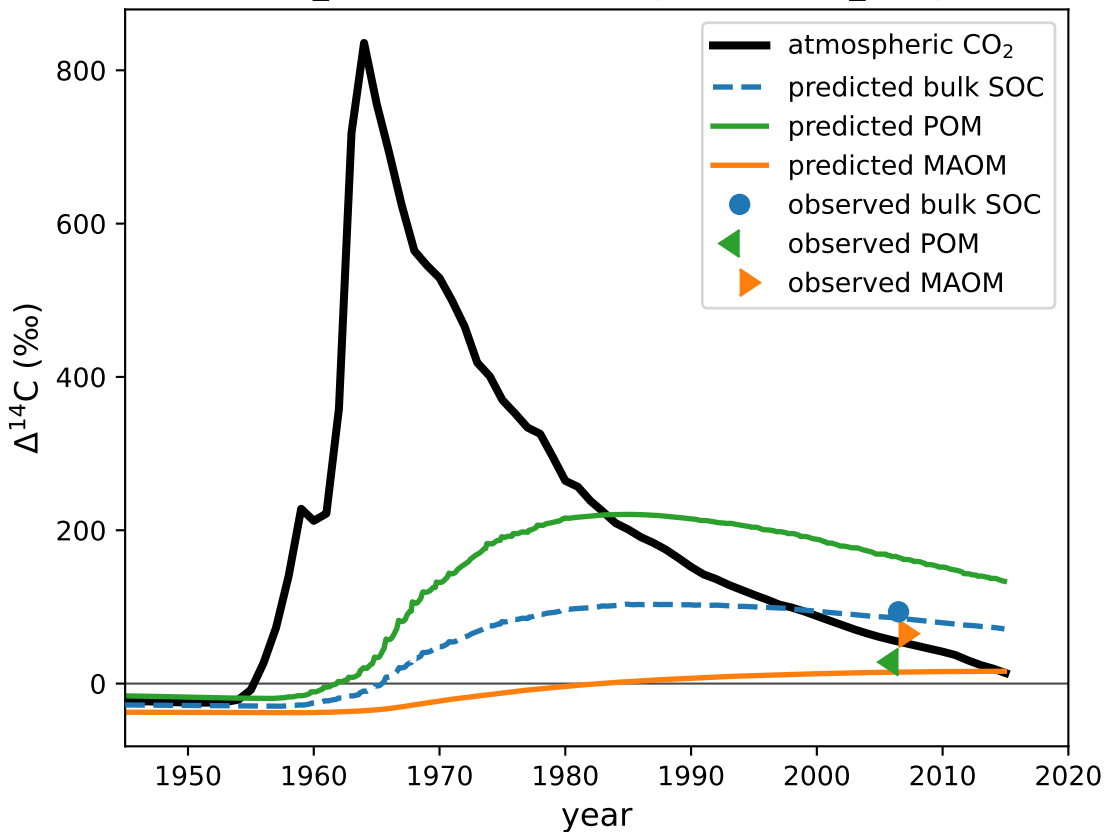

Supplement: Supplementary file 265 [file gmd-2023-242-supplement.zip]

MIMICS  
Lybrand\_2017, Catalina CZO conifer, mixed conifer\_divergent

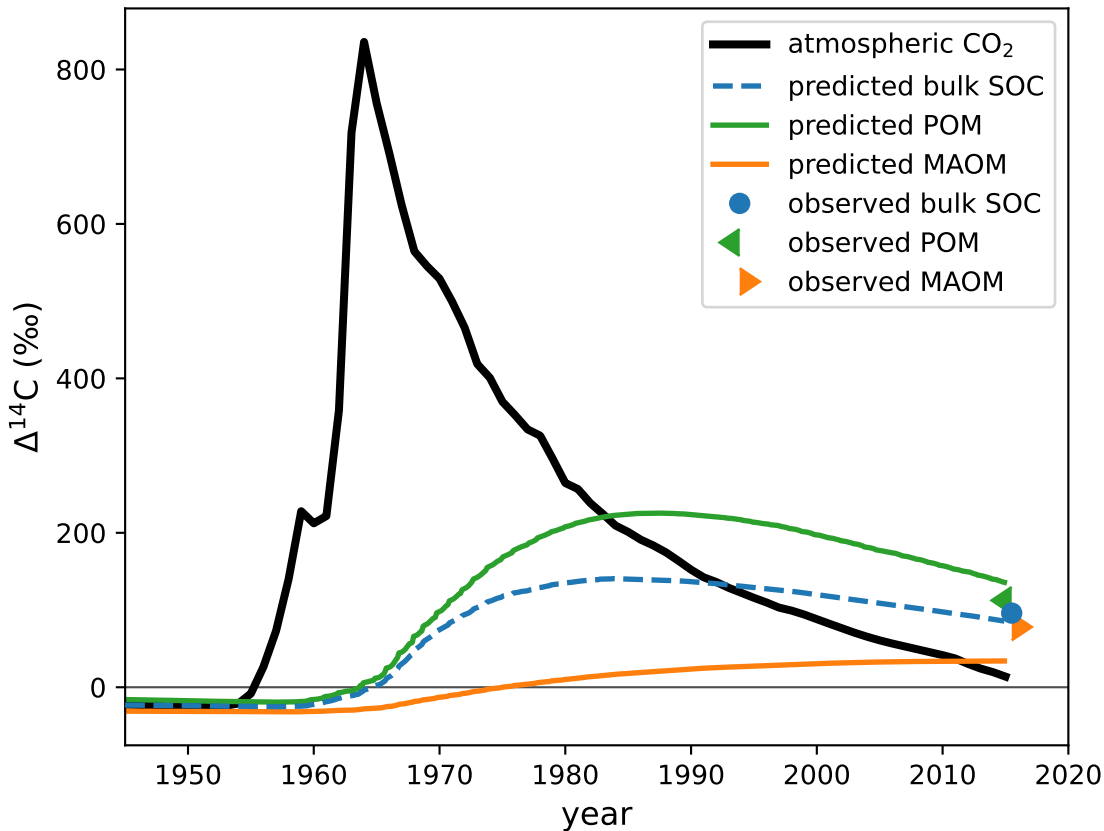

Supplement: Supplementary file 266 [file gmd-2023-242-supplement.zip]

CORPSE  
McFarlane\_2013, MO Ozark BREA, M3

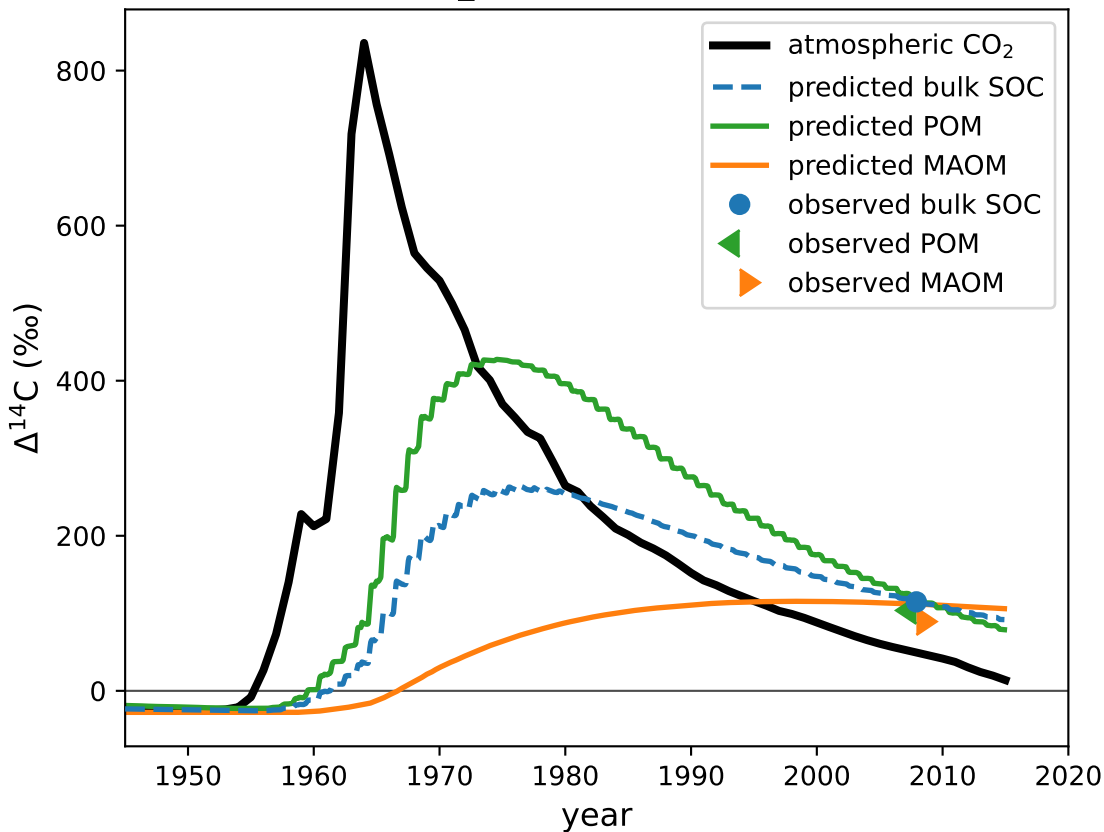

Supplement: Supplementary file 267 [file gmd-2023-242-supplement.zip]

SOMic  
Rasmussen\_2018, GRpp, GRpp

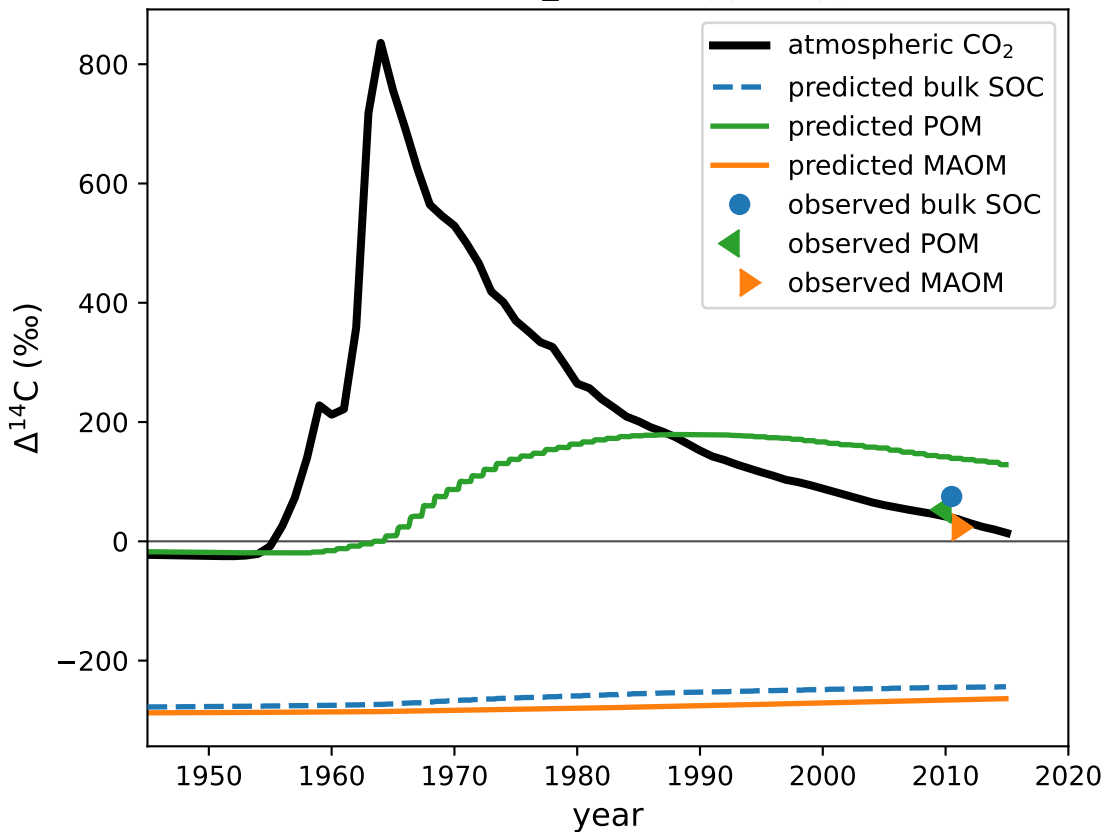

Supplement: Supplementary file 268 [file gmd-2023-242-supplement.zip]

MIMICS  
Lemke\_2006, Solling, Solling\_DO\_F1

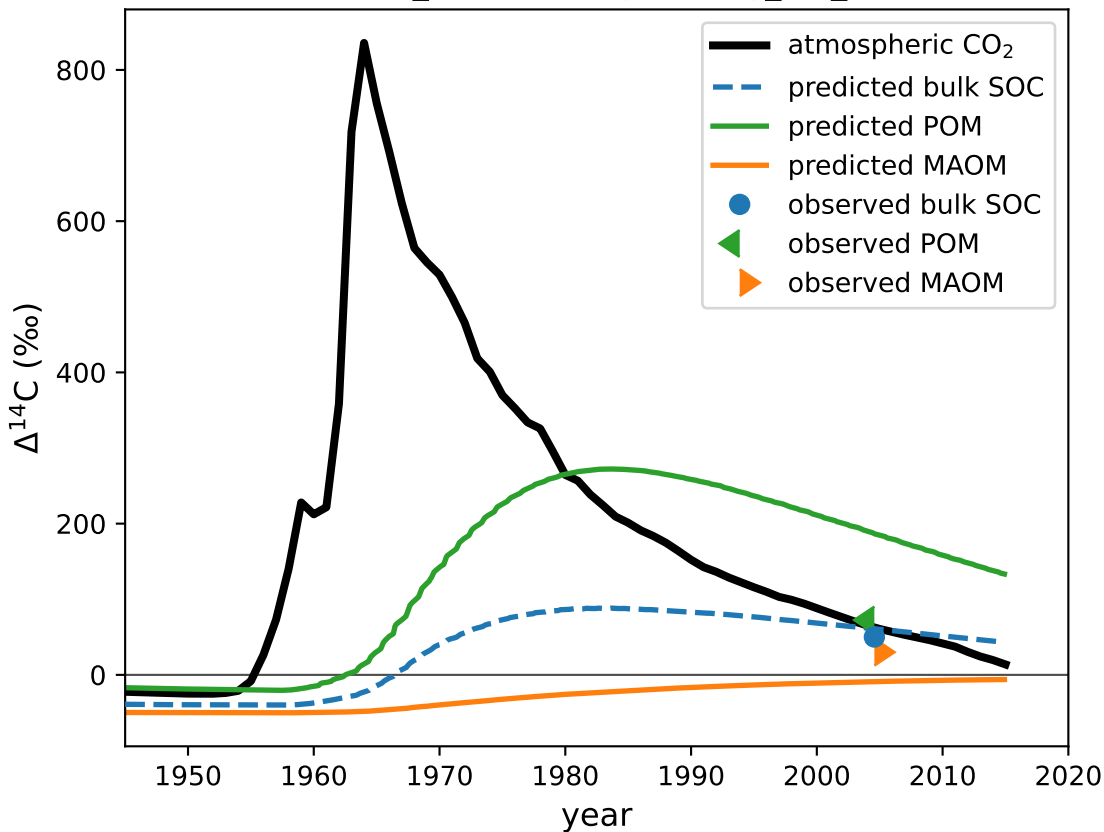

Supplement: Supplementary file 269 [file gmd-2023-242-supplement.zip]

CORPSE  
Heckman\_2018, HI\_Andisol, WPL1204

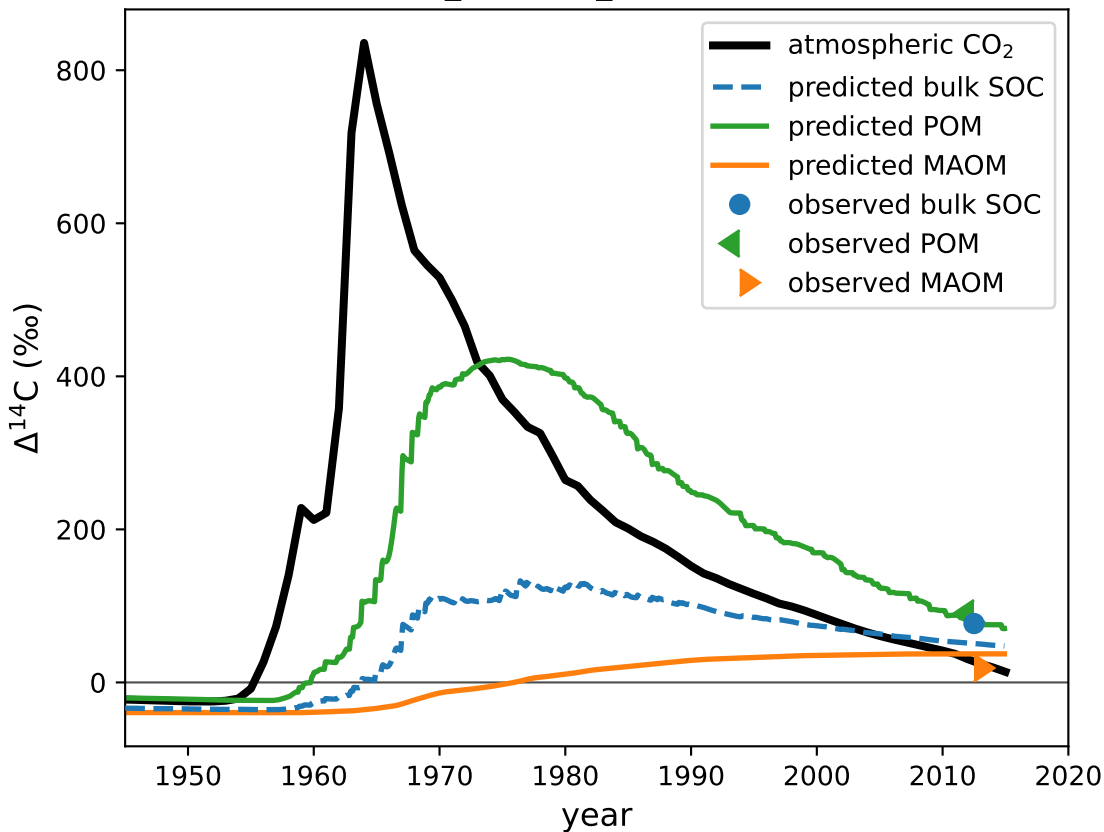

Supplement: Supplementary file 270 [file gmd-2023-242-supplement.zip]

MIMICS  
McFarlane\_2013, MO Ozark BREA, M4

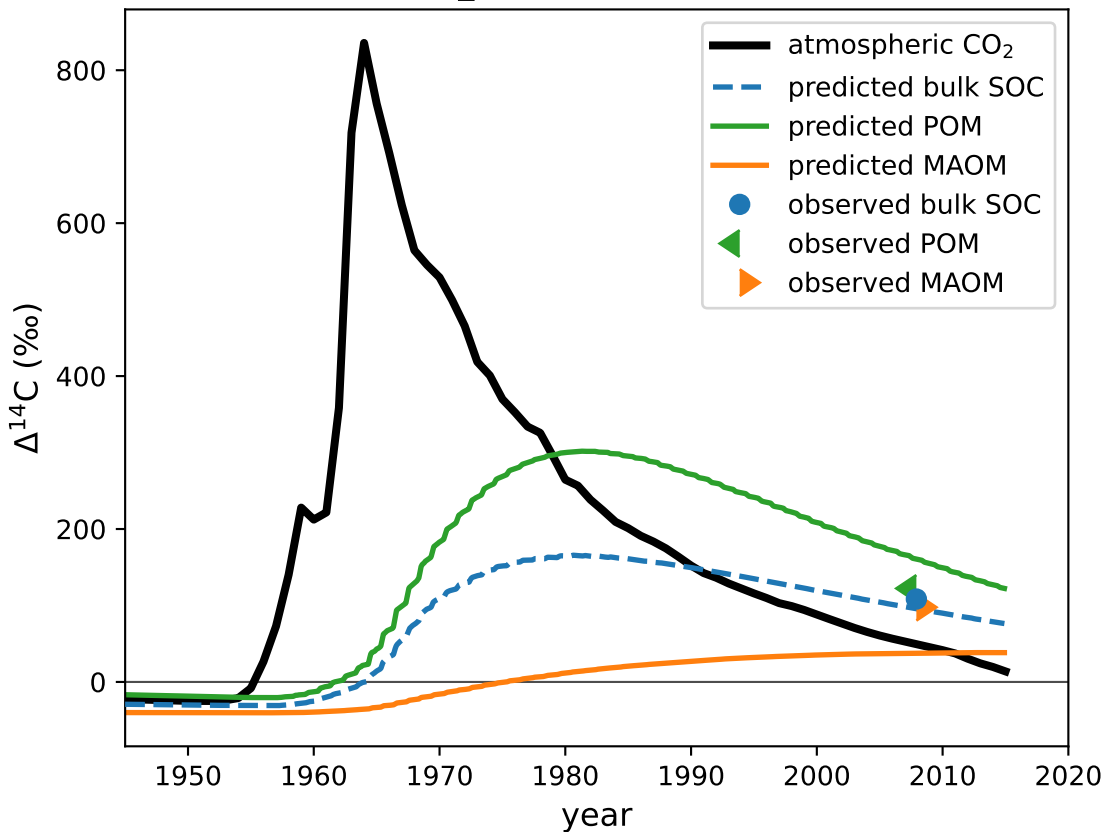

Supplement: Supplementary file 271 [file gmd-2023-242-supplement.zip]

# MEND

Lybrand\_2017, Catalina CZO conifer, mixed conifer\_convergent

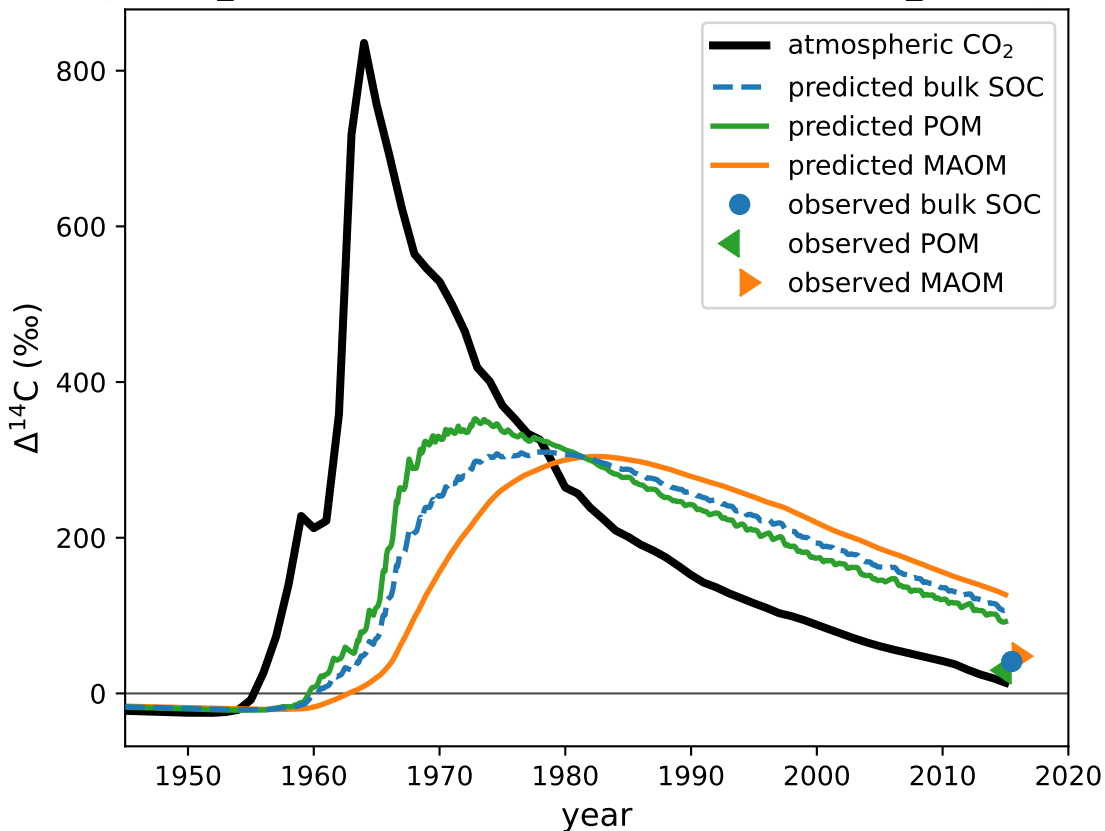

Supplement: Supplementary file 272 [file gmd-2023-242-supplement.zip]

CORPSE  
Meyer\_2012, Matsch, Meadow

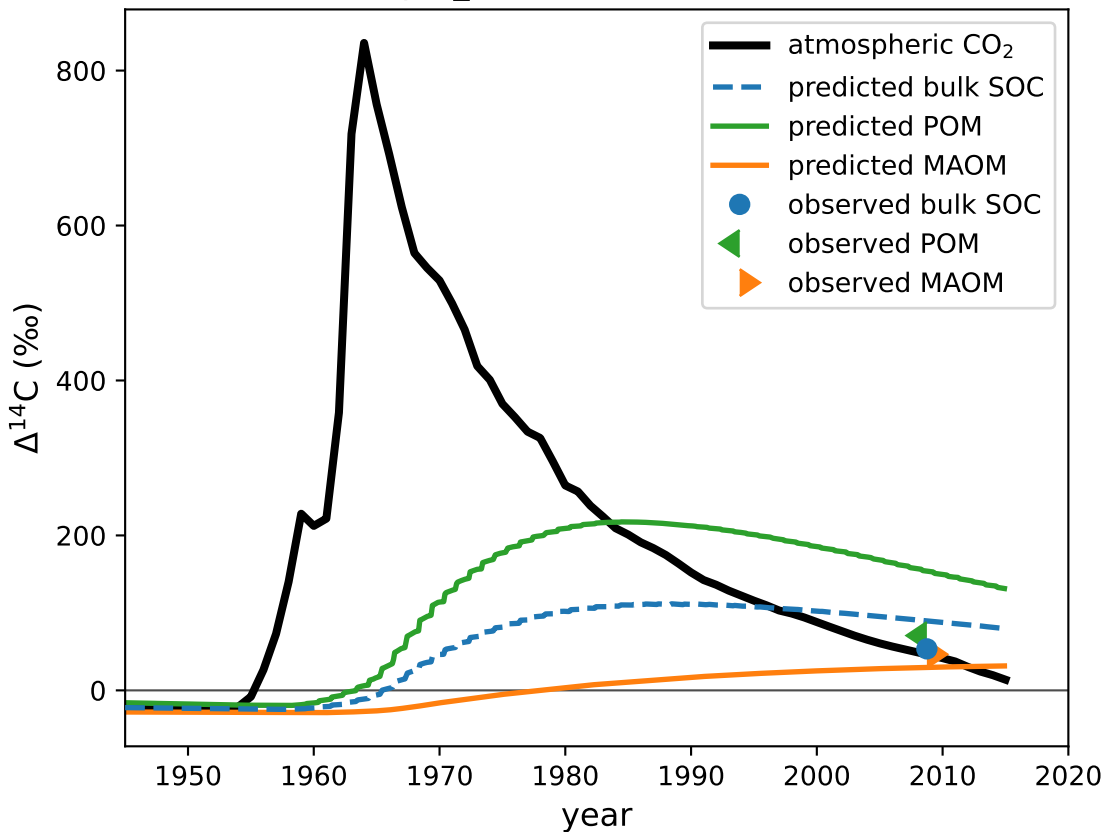

Supplement: Supplementary file 273 [file gmd-2023-242-supplement.zip]

Millennial  
Heckman\_2018, HI\_Andisol, WPL1204

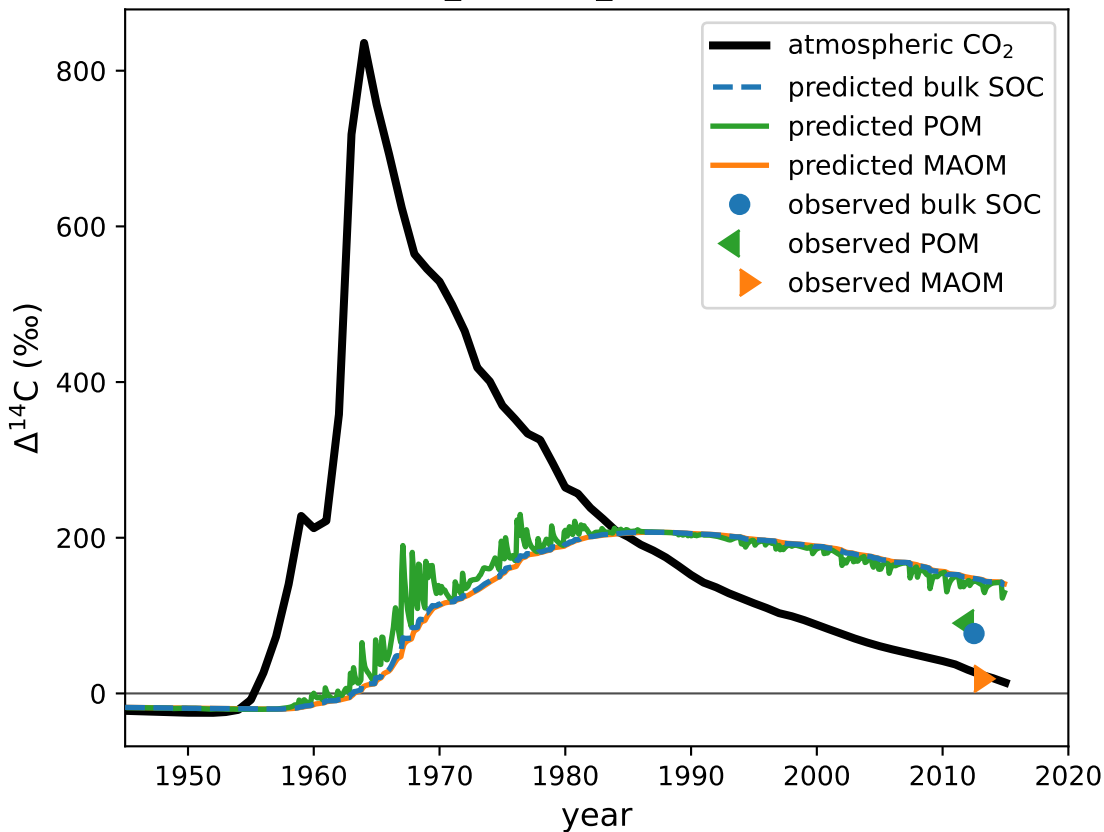

Supplement: Supplementary file 274 [file gmd-2023-242-supplement.zip]

MIMICS  
McFarlane\_2013, NH Bartlett Forest, B4

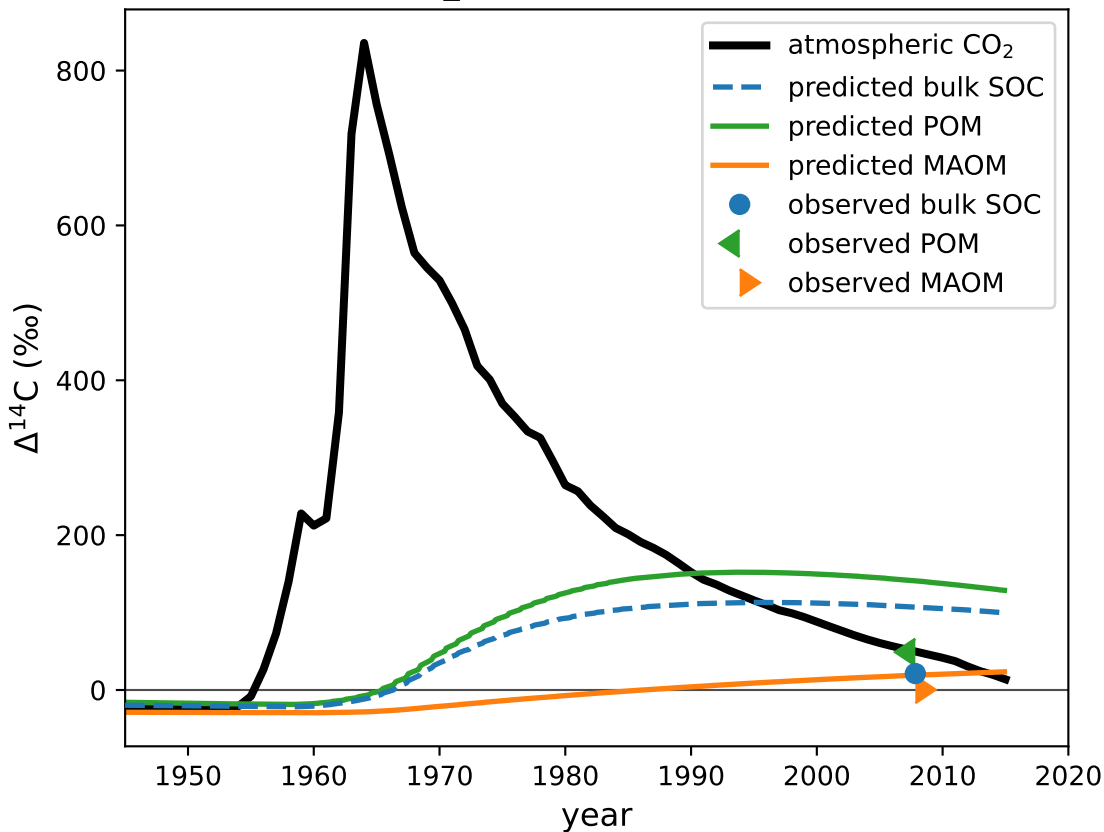

Supplement: Supplementary file 275 [file gmd-2023-242-supplement.zip]

Millennial  
McFarlane\_2013, Mi-Fine Colonial Point, C3

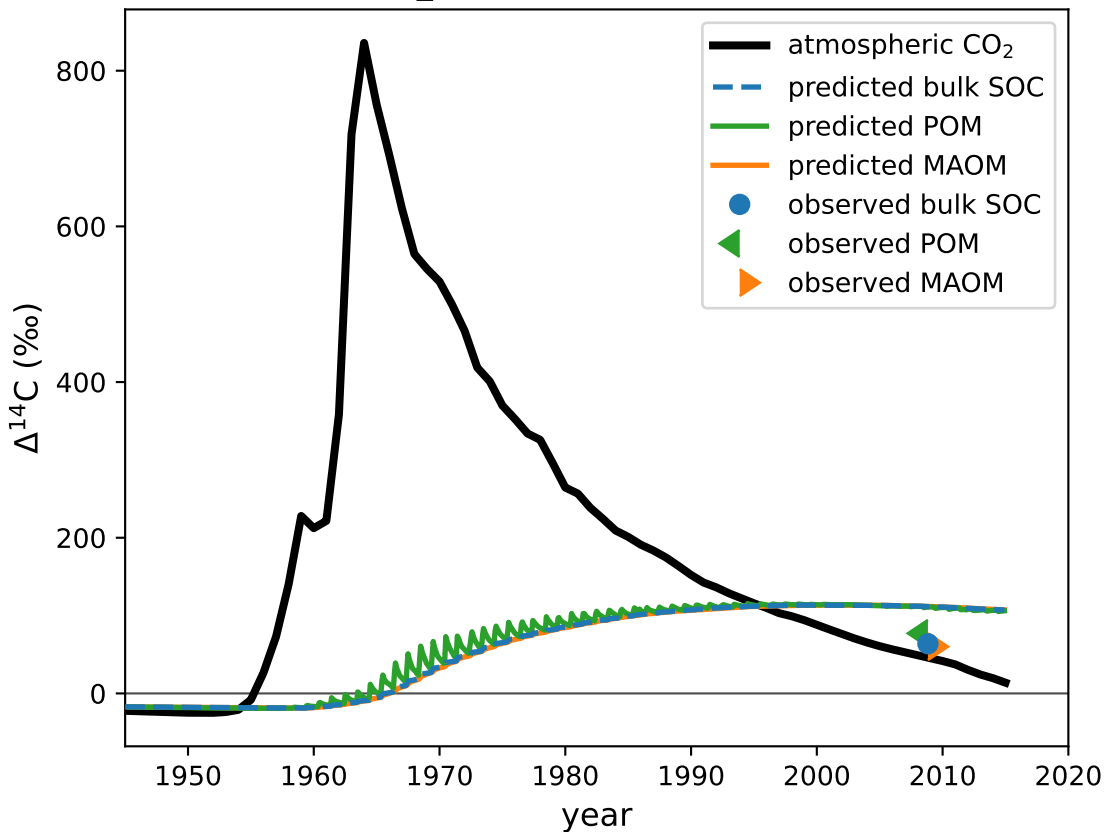

Supplement: Supplementary file 276 [file gmd-2023-242-supplement.zip]

SOMic  
Berhe\_2012, Tennessee Valley, hollow comp

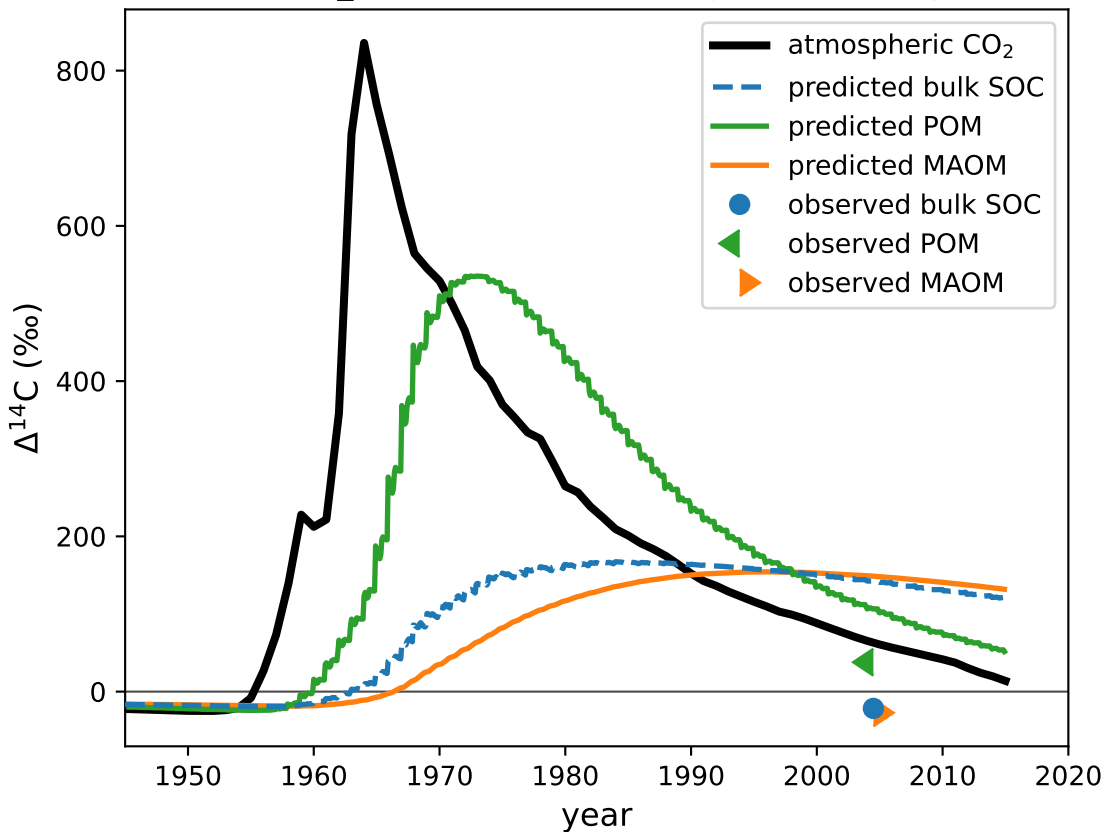

Supplement: Supplementary file 277 [file gmd-2023-242-supplement.zip]

CORPSE  
Marin-Spiotta\_2008, Sierra de Cayey, Active pastures

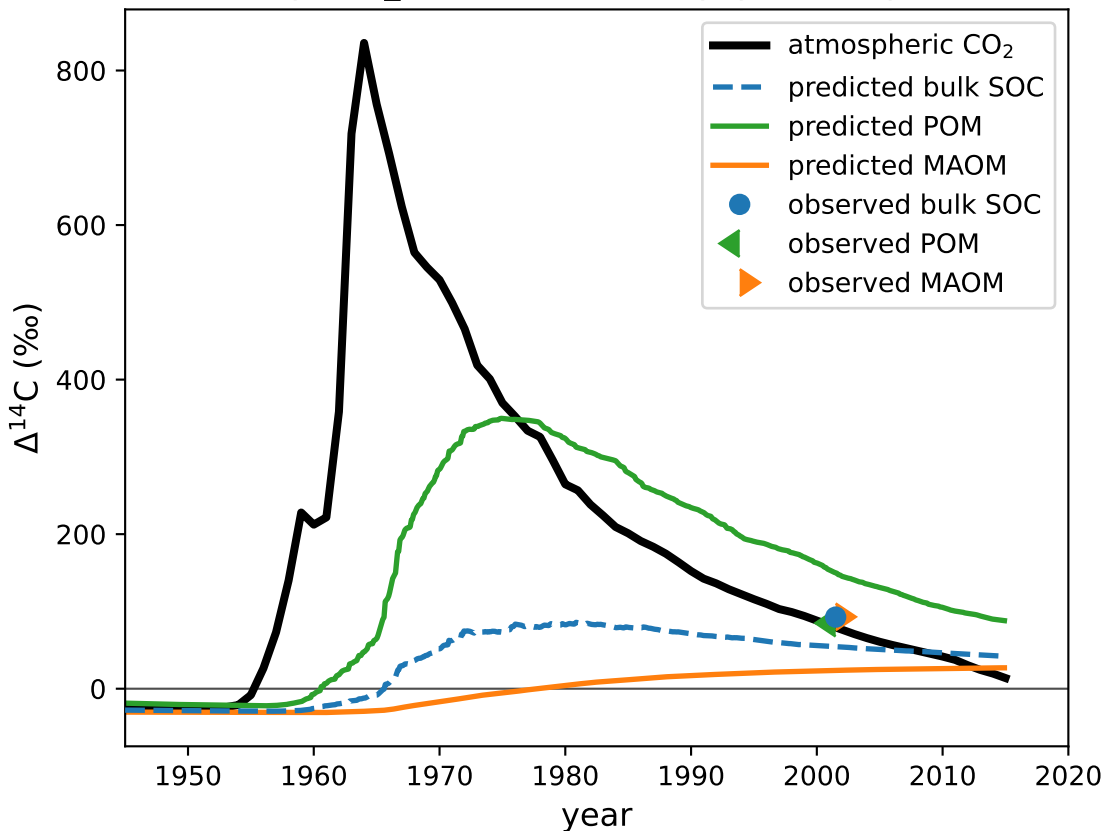

Supplement: Supplementary file 278 [file gmd-2023-242-supplement.zip]

Millennial  
McFarlane\_2013, MI-Coarse UMBS, 60M

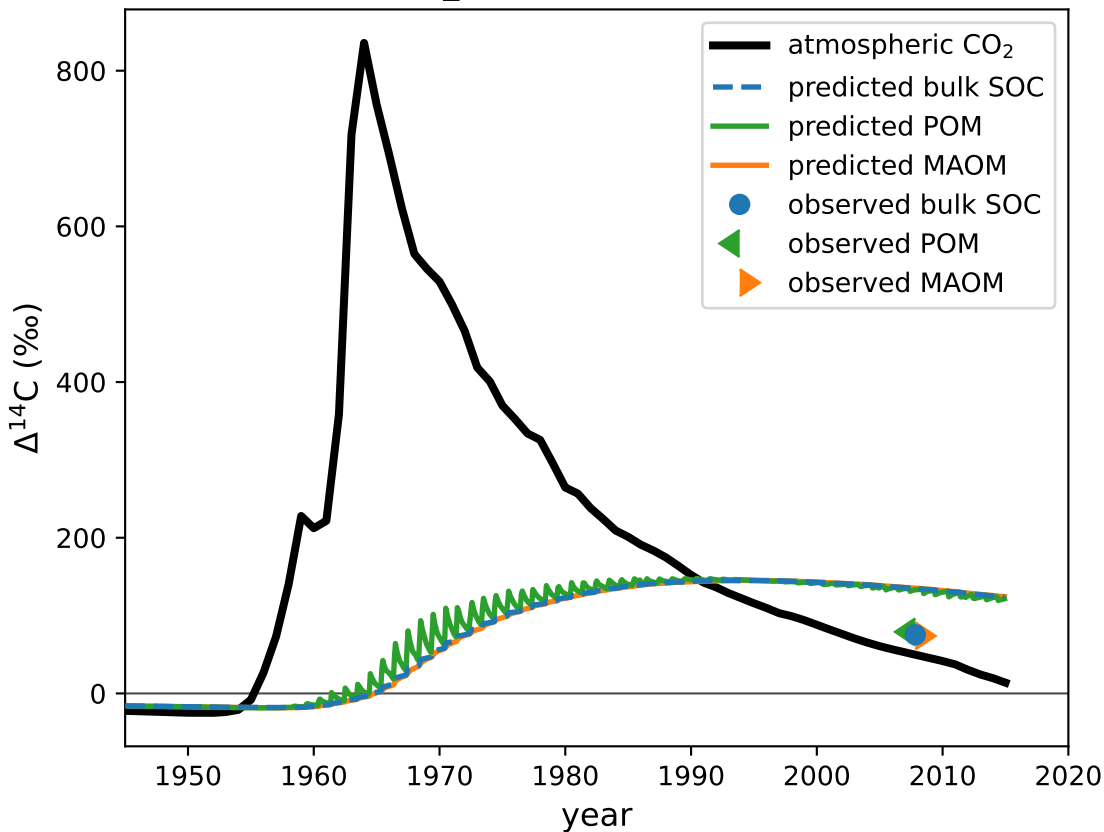

Supplement: Supplementary file 279 [file gmd-2023-242-supplement.zip]

CORPSE  
Baisden\_2002, Riverbank, Riverbank.1949

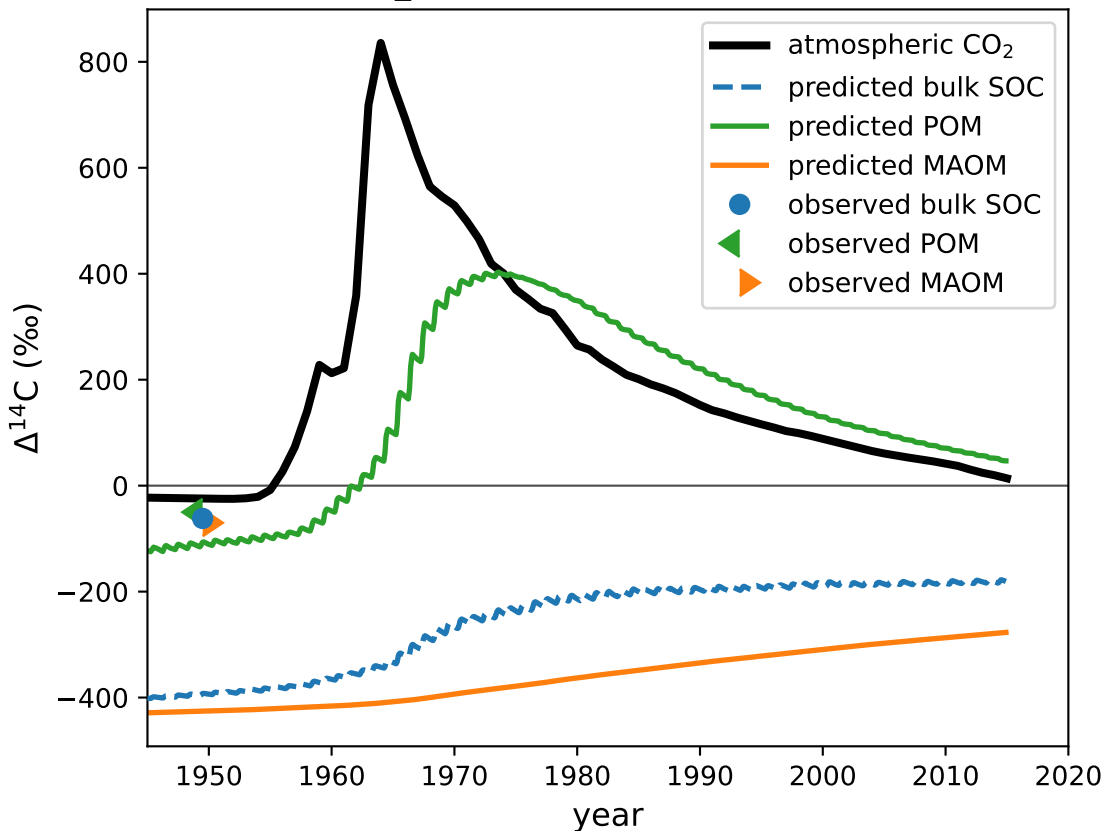

Supplement: Supplementary file 280 [file gmd-2023-242-supplement.zip]

CORPSE  
Schrumpf\_2013, Hesse, Hesse.1

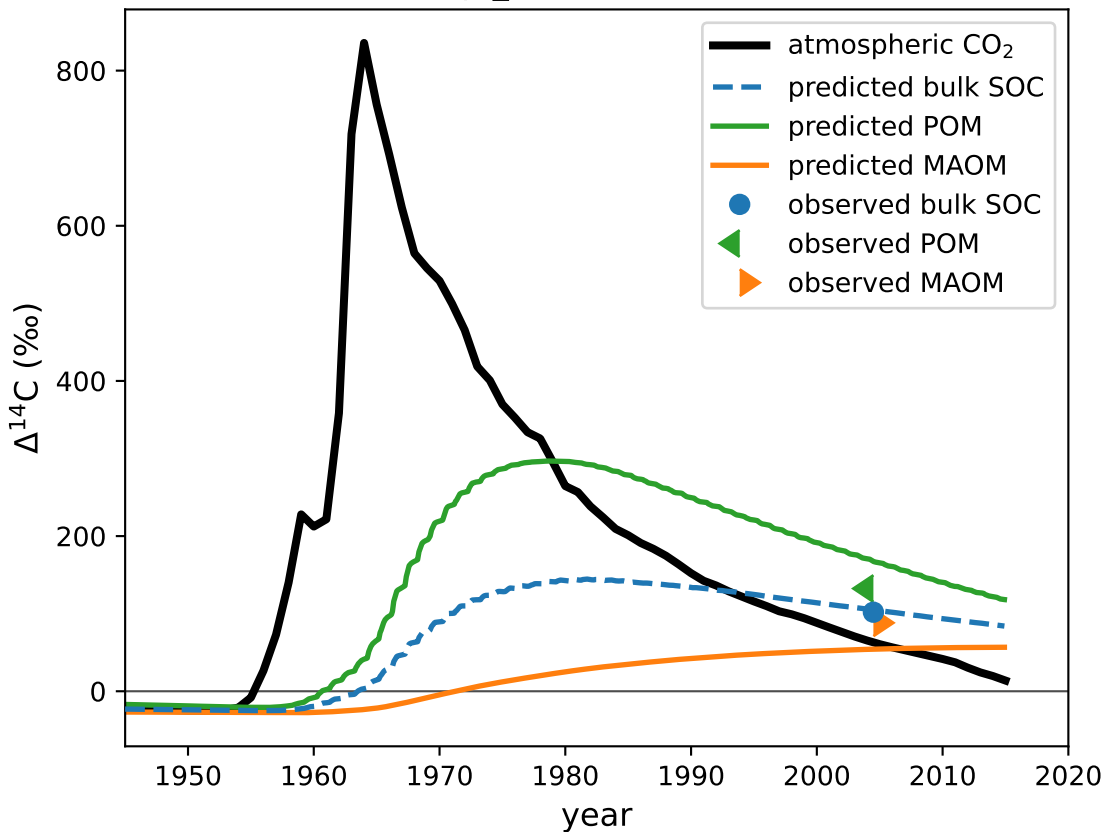

Supplement: Supplementary file 281 [file gmd-2023-242-supplement.zip]

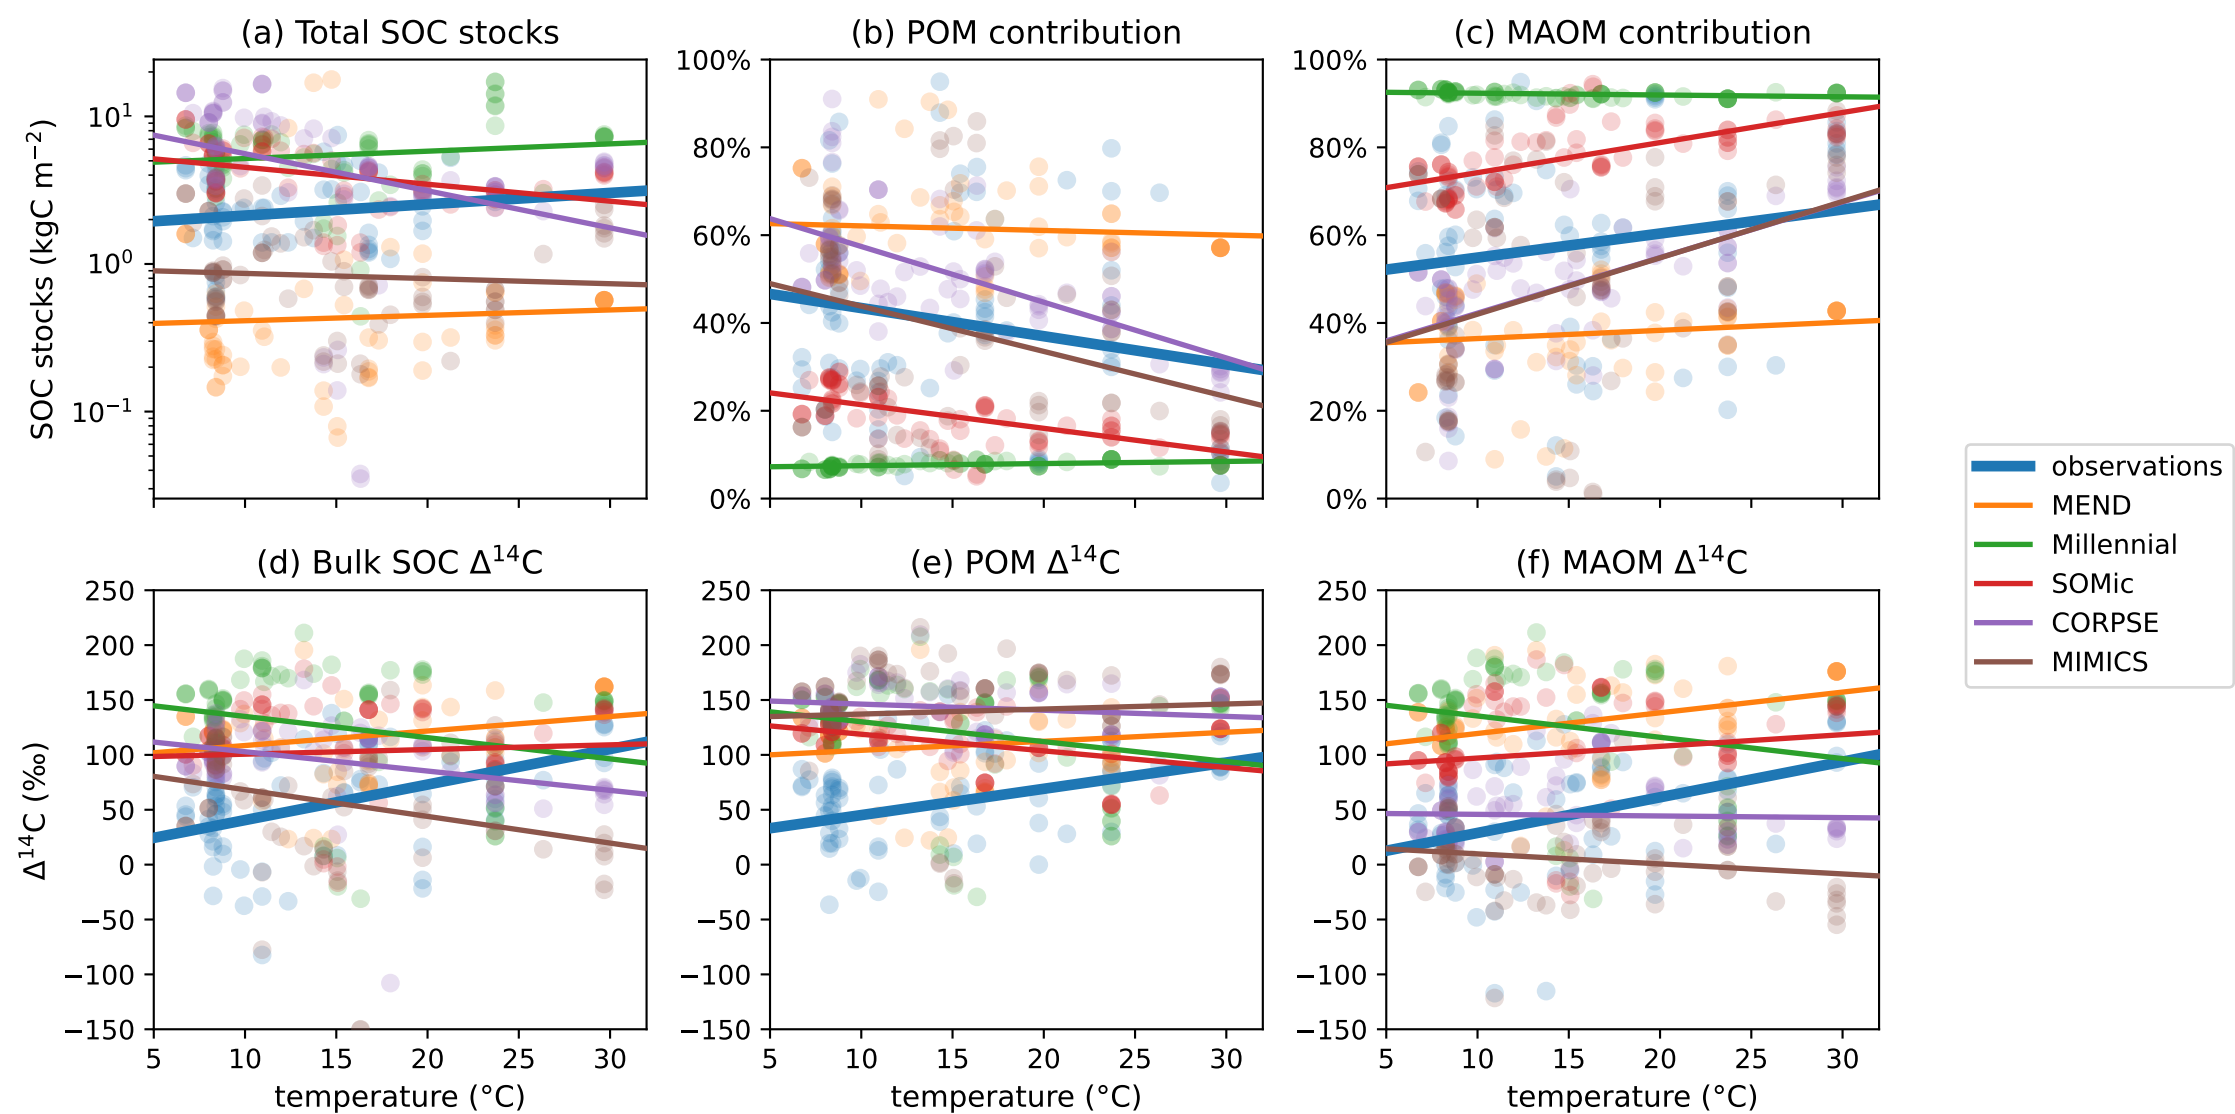

Supplement: Supplementary file 282 [file gmd-2023-242-supplement.zip]

MEND  
Baisden\_2002, Riverbank, Riverbank.1949

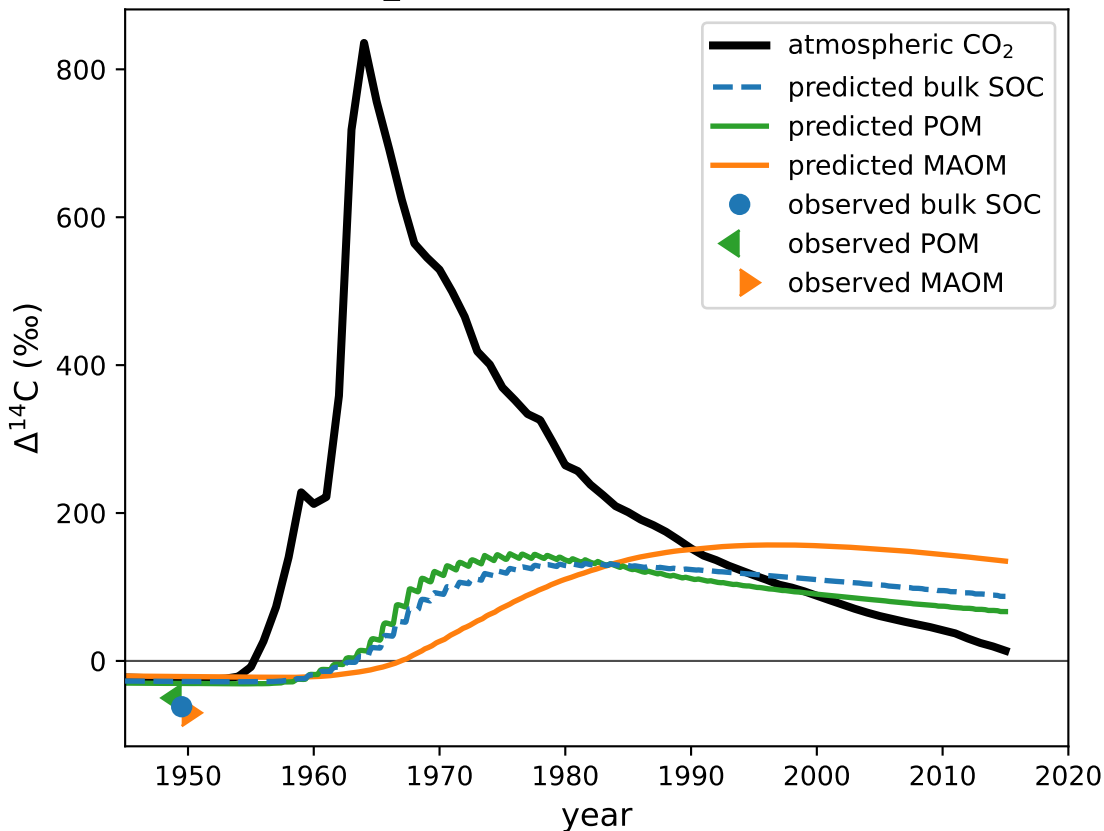

Supplement: Supplementary file 283 [file gmd-2023-242-supplement.zip]

MIMICS  
Schrumpf\_2013, Laqueuille, Laqueuille.1

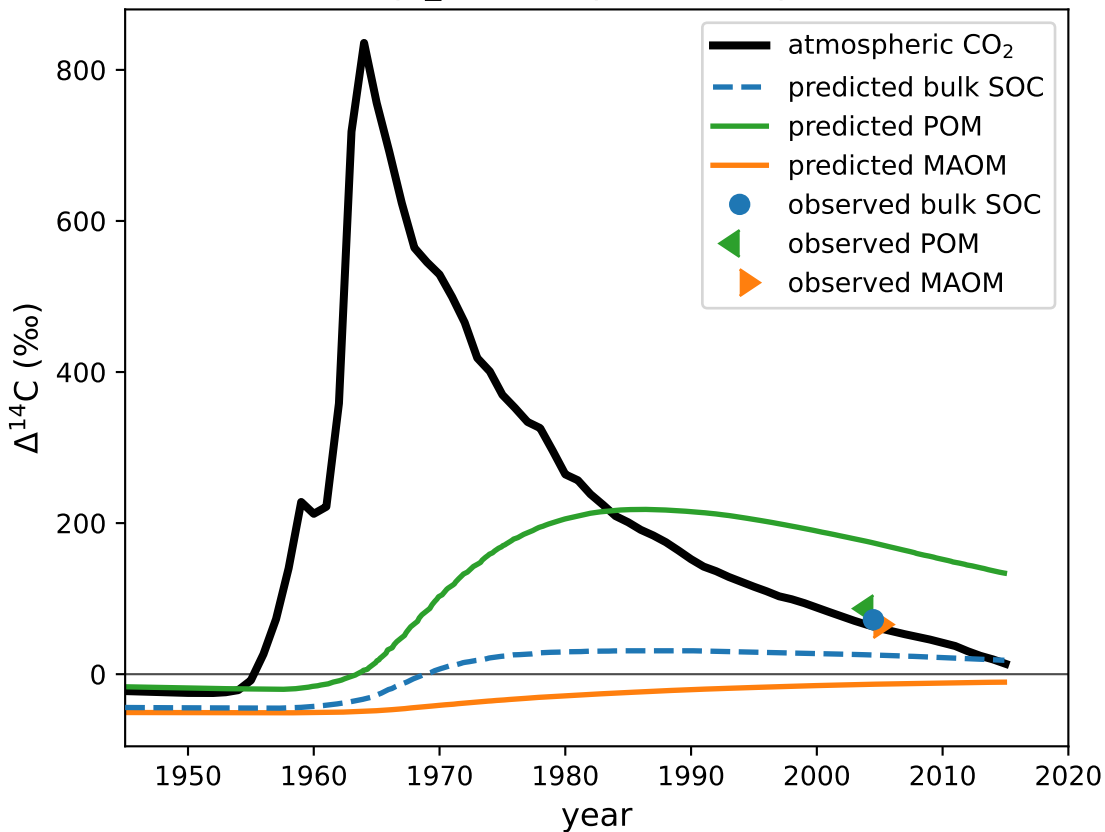

Supplement: Supplementary file 285 [file gmd-2023-242-supplement.zip]

# MIMICS

Marin-Spiotta\_2008, Sierra de Cayey, 80yr secondary forest

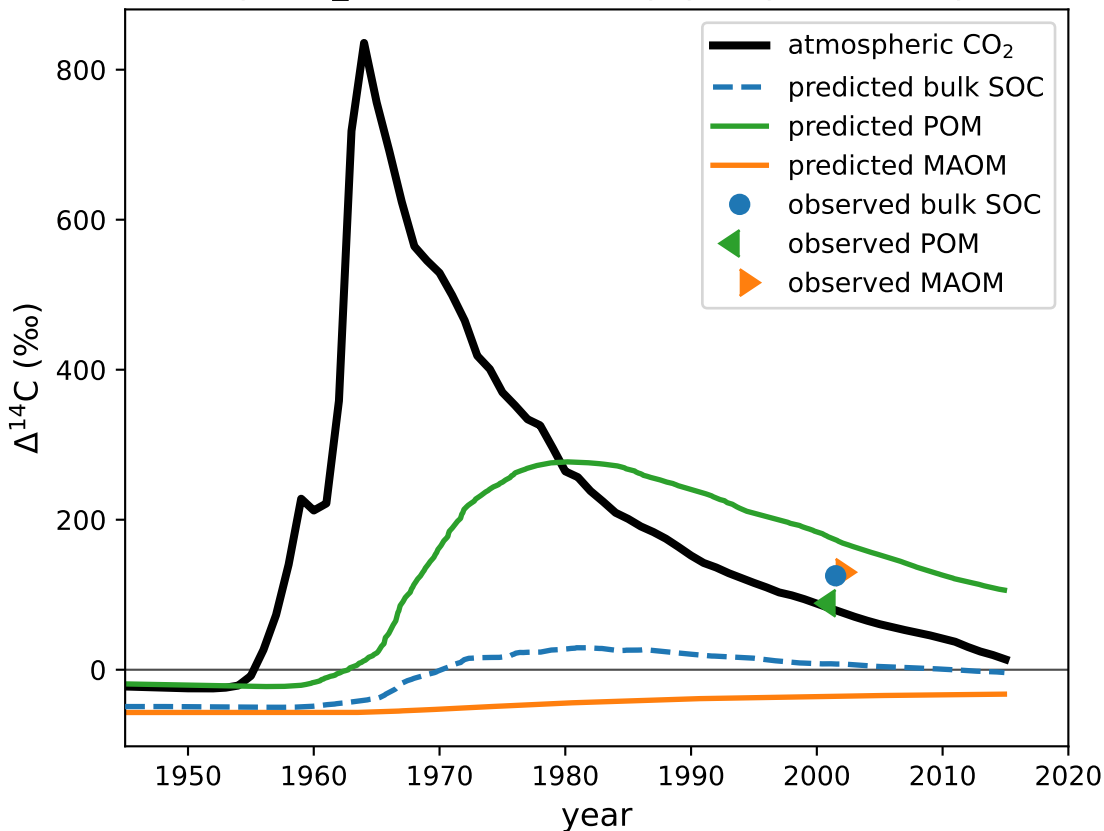

Supplement: Supplementary file 286 [file gmd-2023-242-supplement.zip]

Millennial  
Rasmussen\_2018, ANpp, ANpp

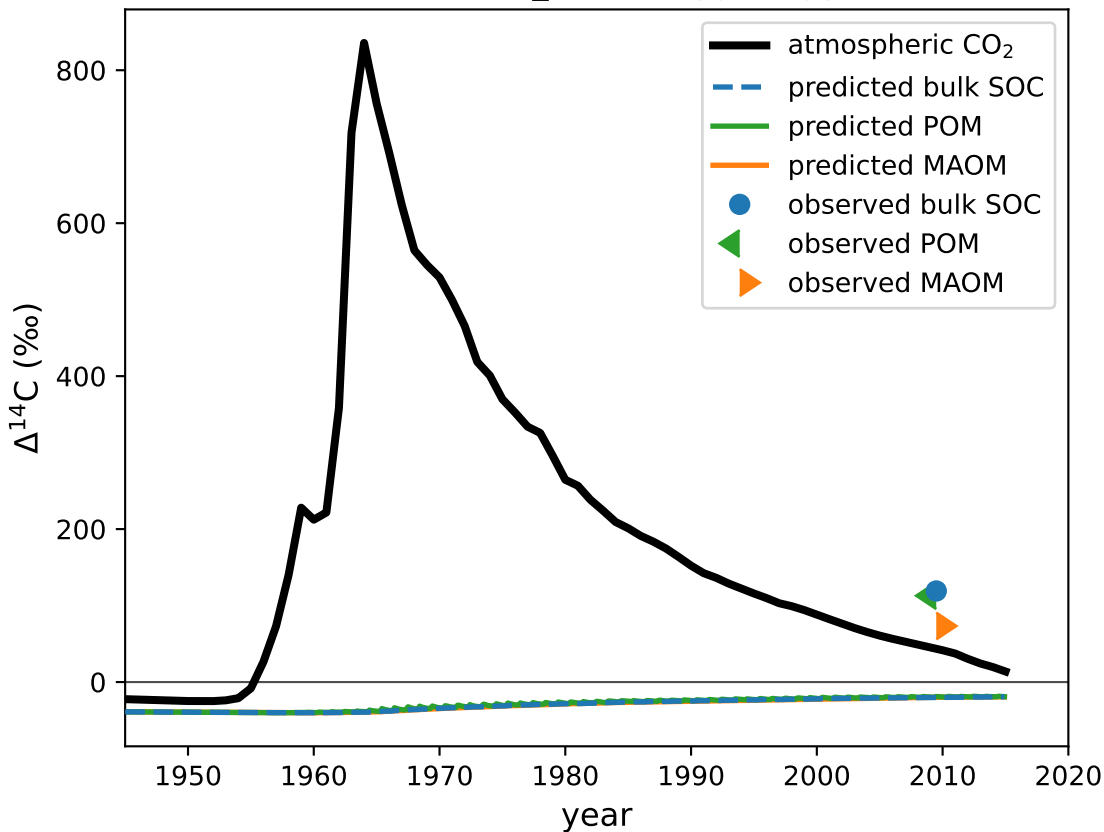

Supplement: Supplementary file 287 [file gmd-2023-242-supplement.zip]

MEND  
McFarlane\_2013, MO Ozark BREA, M3

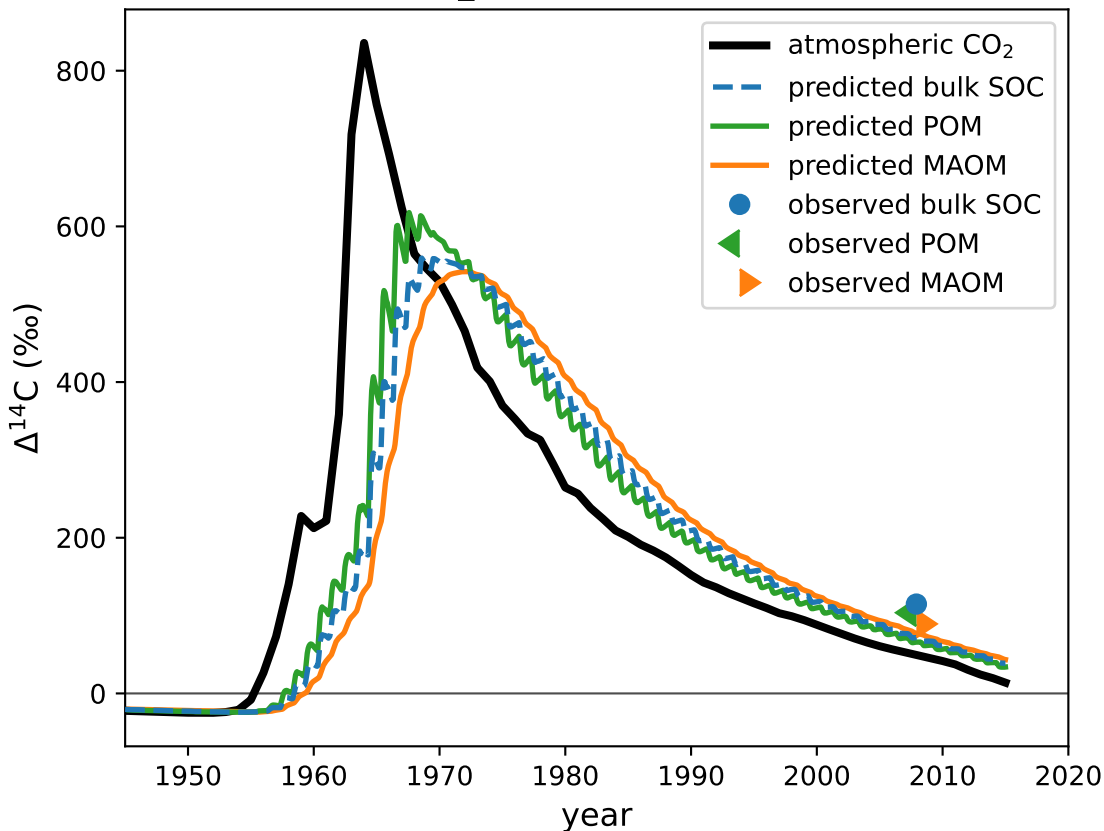

Supplement: Supplementary file 288 [file gmd-2023-242-supplement.zip]

MIMICS  
McFarlane\_2013, Mi-Fine Colonial Point, C3

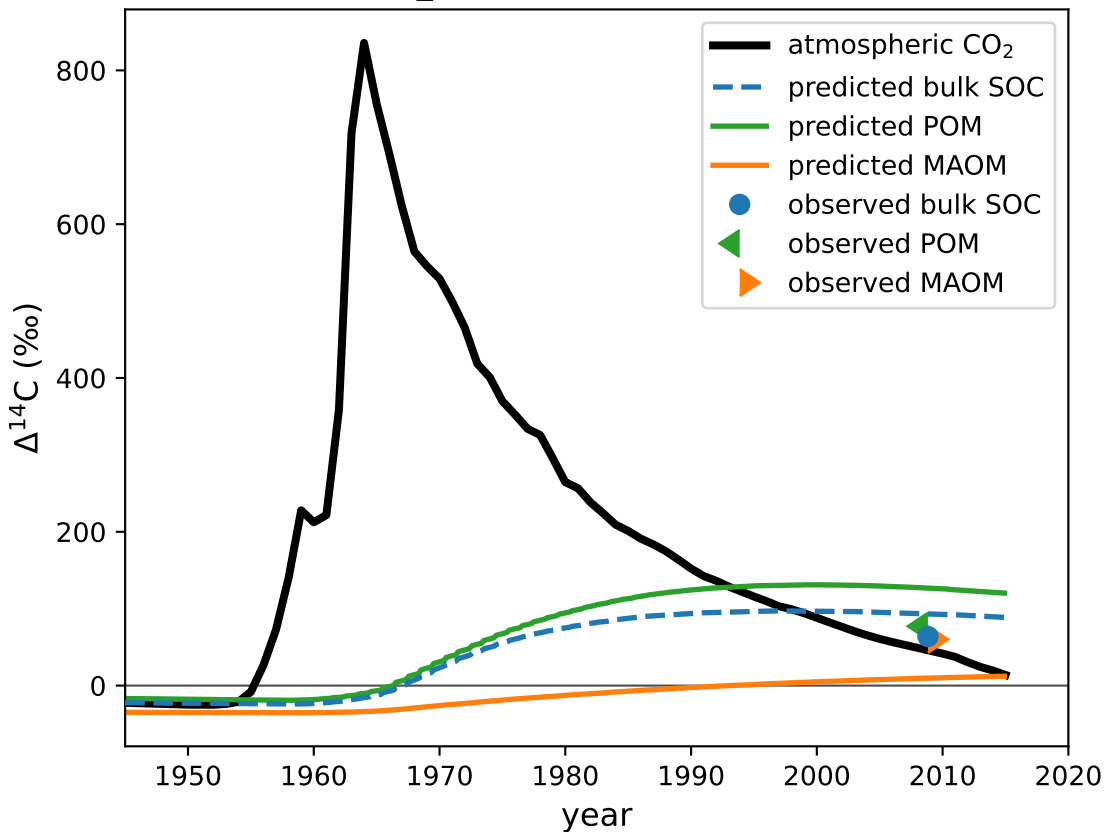

Supplement: Supplementary file 289 [file gmd-2023-242-supplement.zip]

CORPSE  
Marin-Spiotta\_2008, Sierra de Cayey, Primary forest

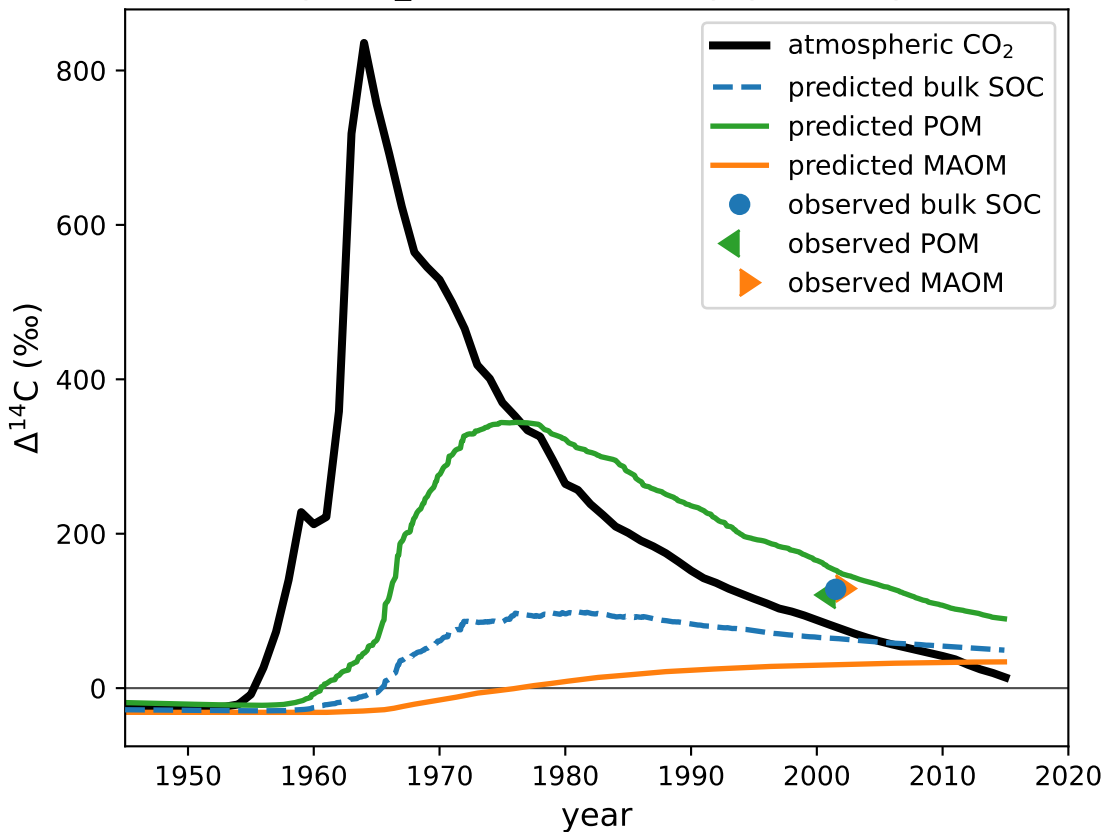

Supplement: Supplementary file 290 [file gmd-2023-242-supplement.zip]

Millennial  
McFarlane\_2013, NH Bartlett Forest, B3

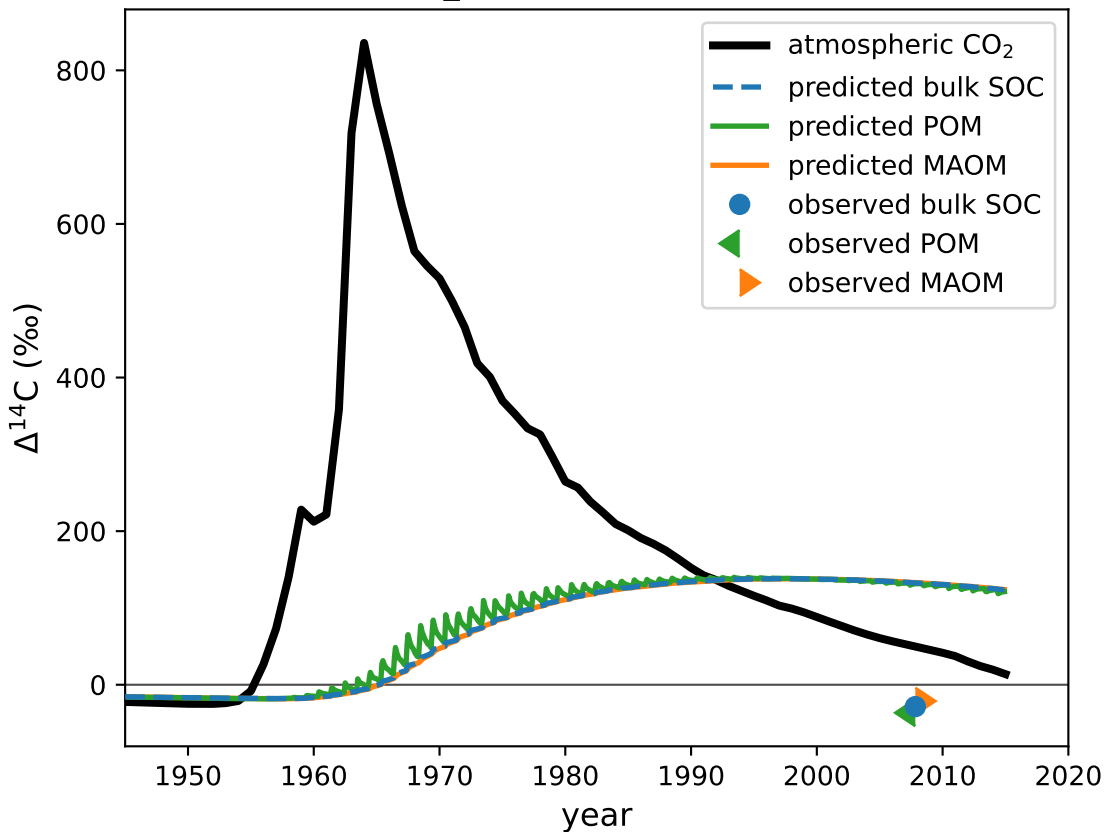

Supplement: Supplementary file 291 [file gmd-2023-242-supplement.zip]

SOMic  
Lemke\_2006, Solling, Solling\_DO\_F2

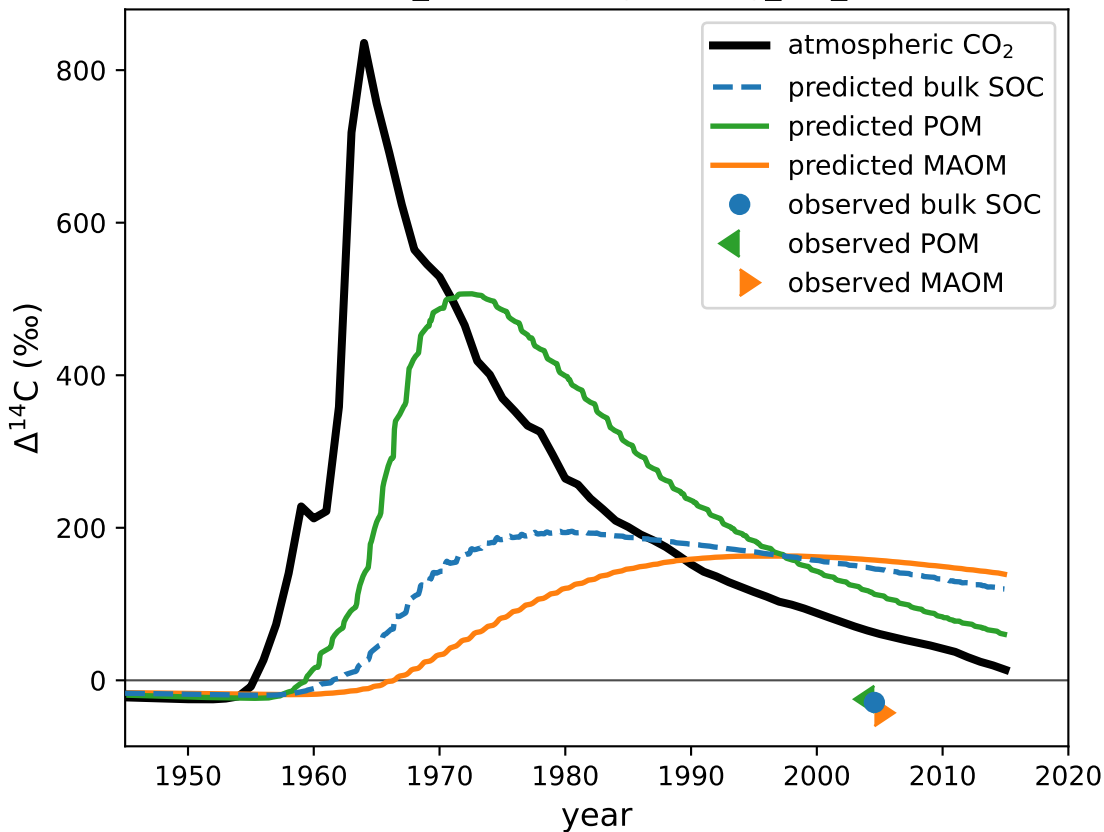

Supplement: Supplementary file 292 [file gmd-2023-242-supplement.zip]

MEND  
Heckman\_2010, Mt. Lemmon Granite, MLGR\_composite

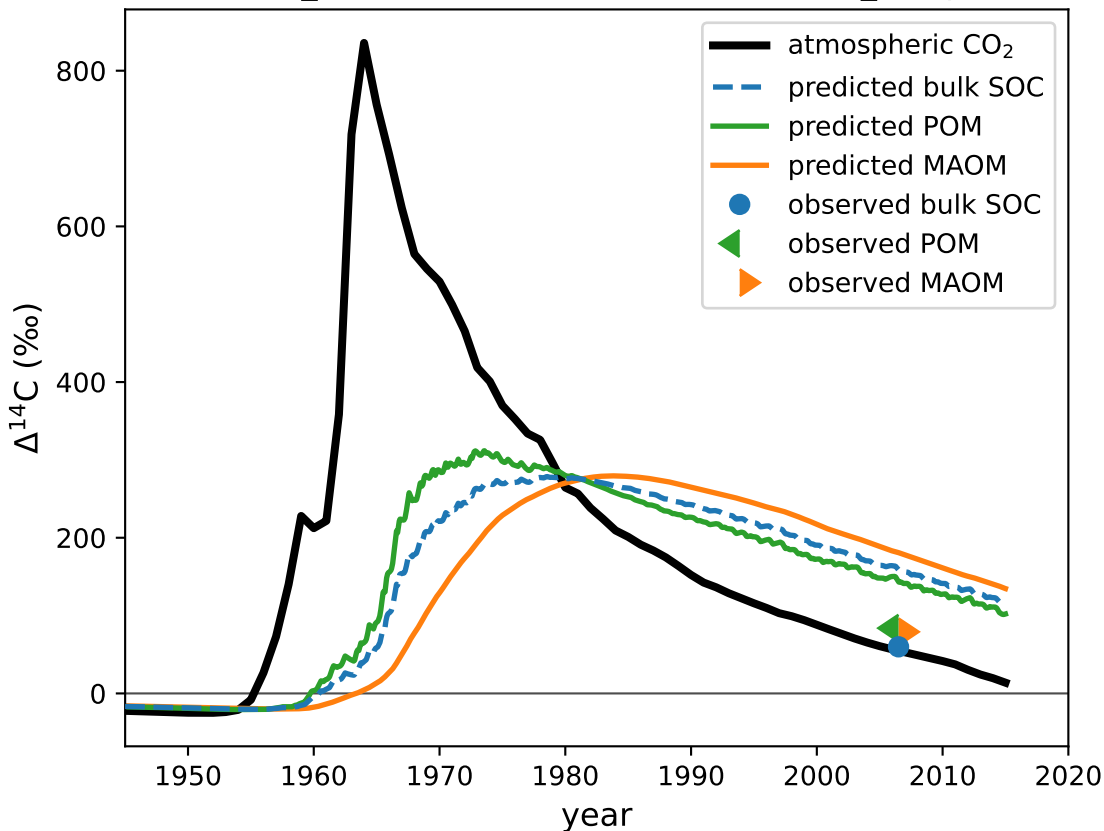

Supplement: Supplementary file 293 [file gmd-2023-242-supplement.zip]

Millennial  
Lybrand\_2017, Catalina CZO desert, desert scrub\_convergent

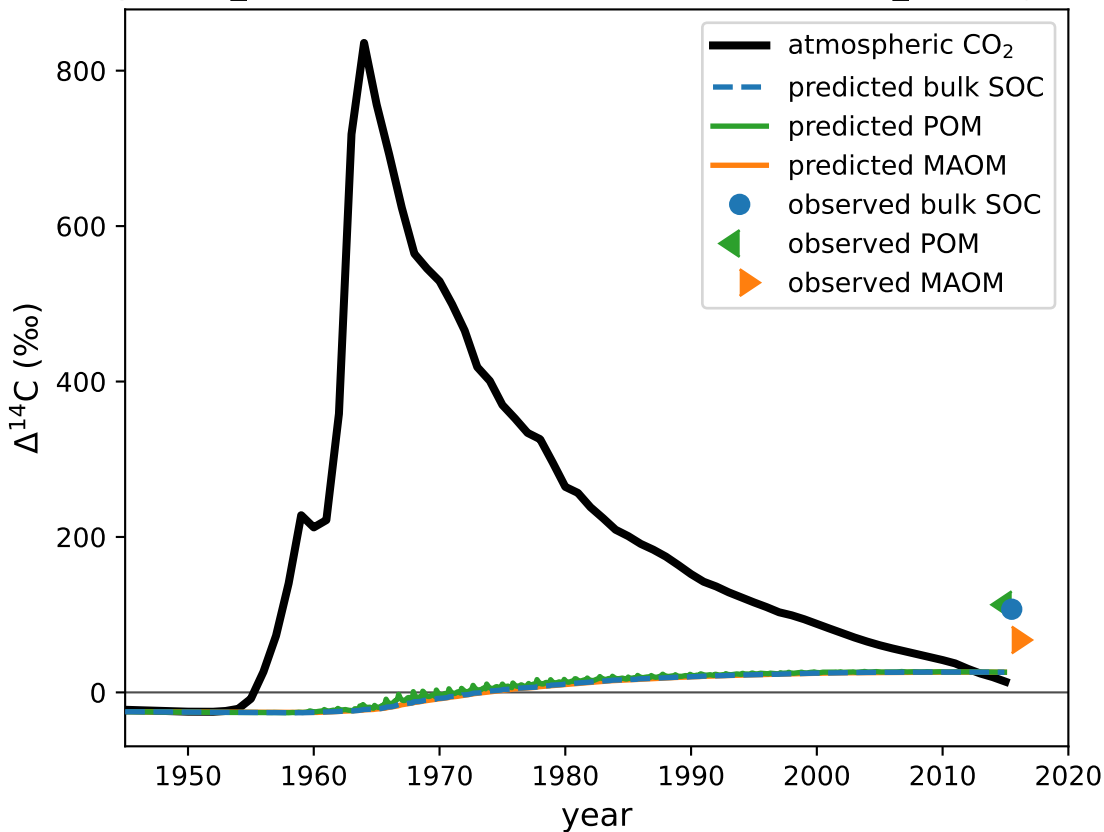

Supplement: Supplementary file 294 [file gmd-2023-242-supplement.zip]

# MEND

Marin-Spiotta\_2008, Sierra de Cayey, 30yr secondary forest

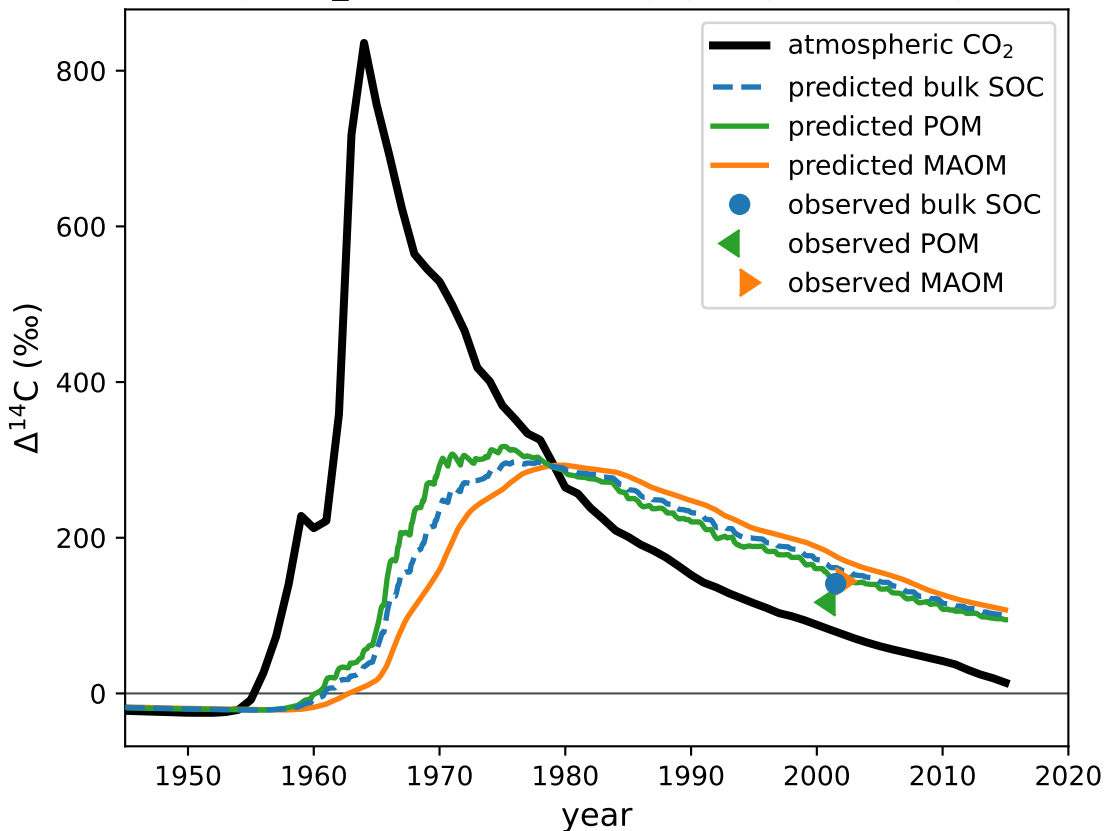

Supplement: Supplementary file 296 [file gmd-2023-242-supplement.zip]

Millennial  
Meyer\_2012, Stubai, Abandoned

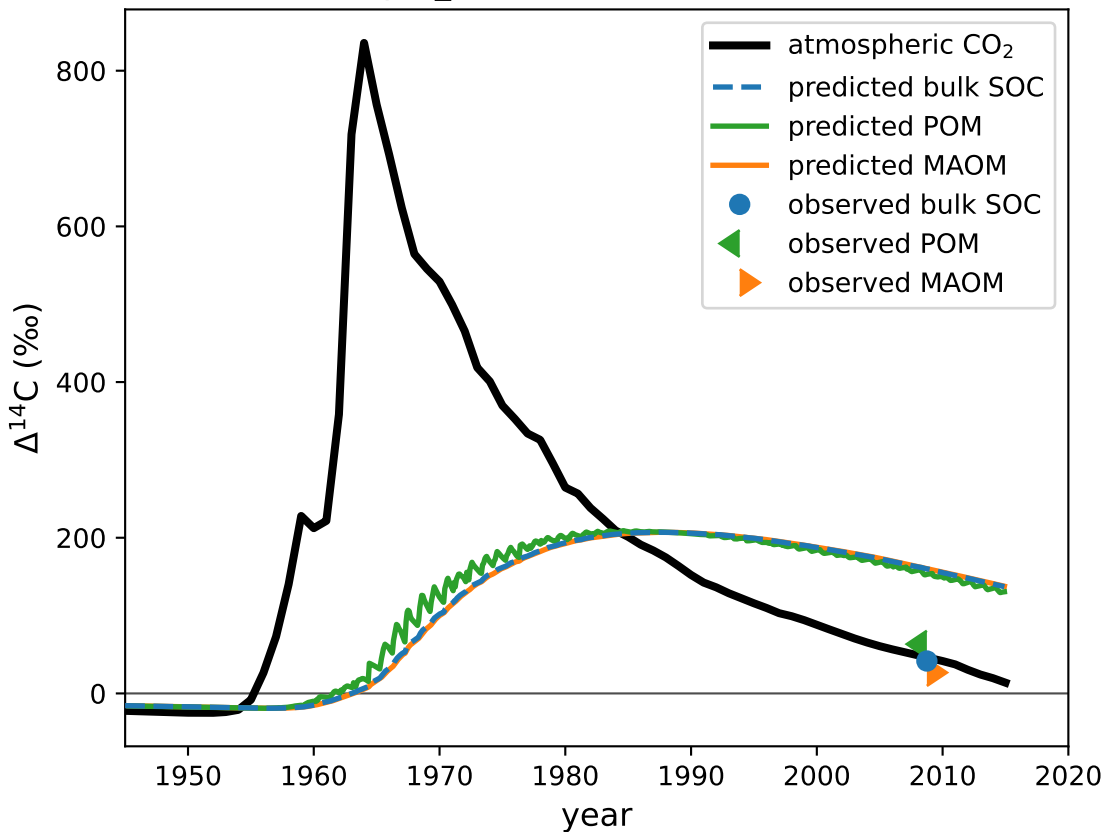

Supplement: Supplementary file 297 [file gmd-2023-242-supplement.zip]

SOMic  
Meyer\_2012, Matsch, Meadow

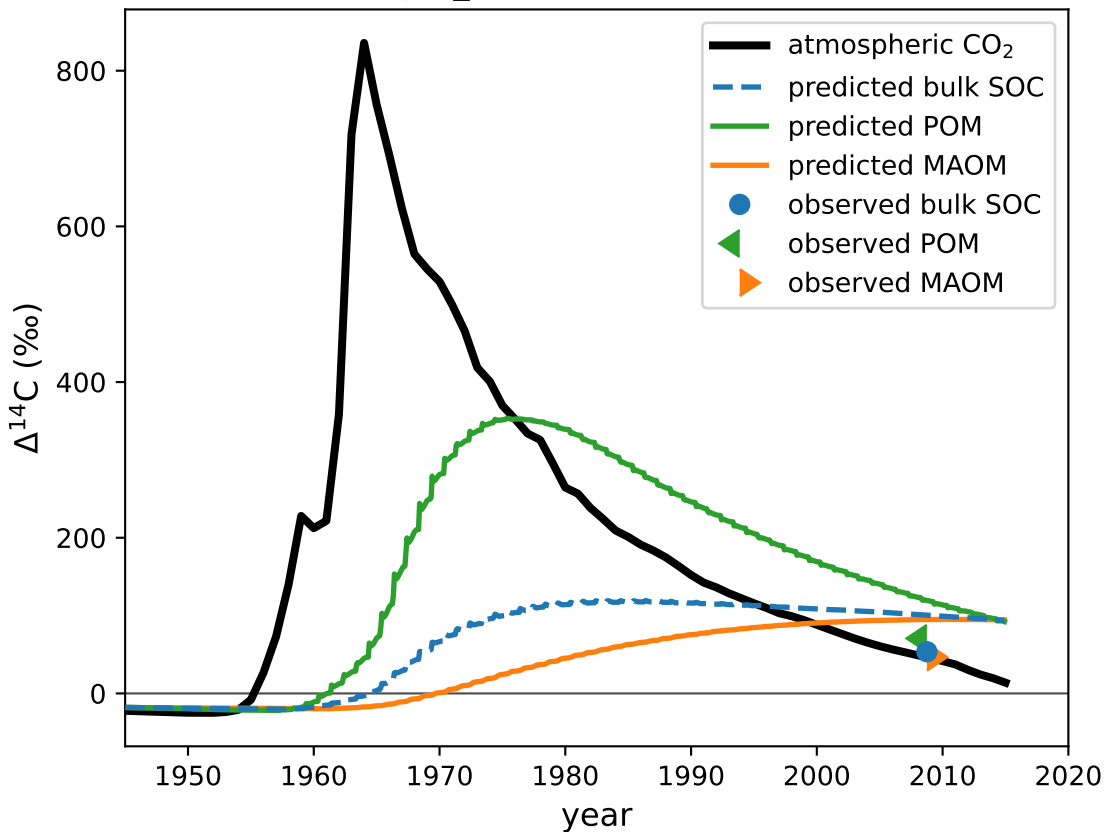

Supplement: Supplementary file 298 [file gmd-2023-242-supplement.zip]

CORPSE  
McFarlane\_2013, Mi-Fine Colonial Point, C1

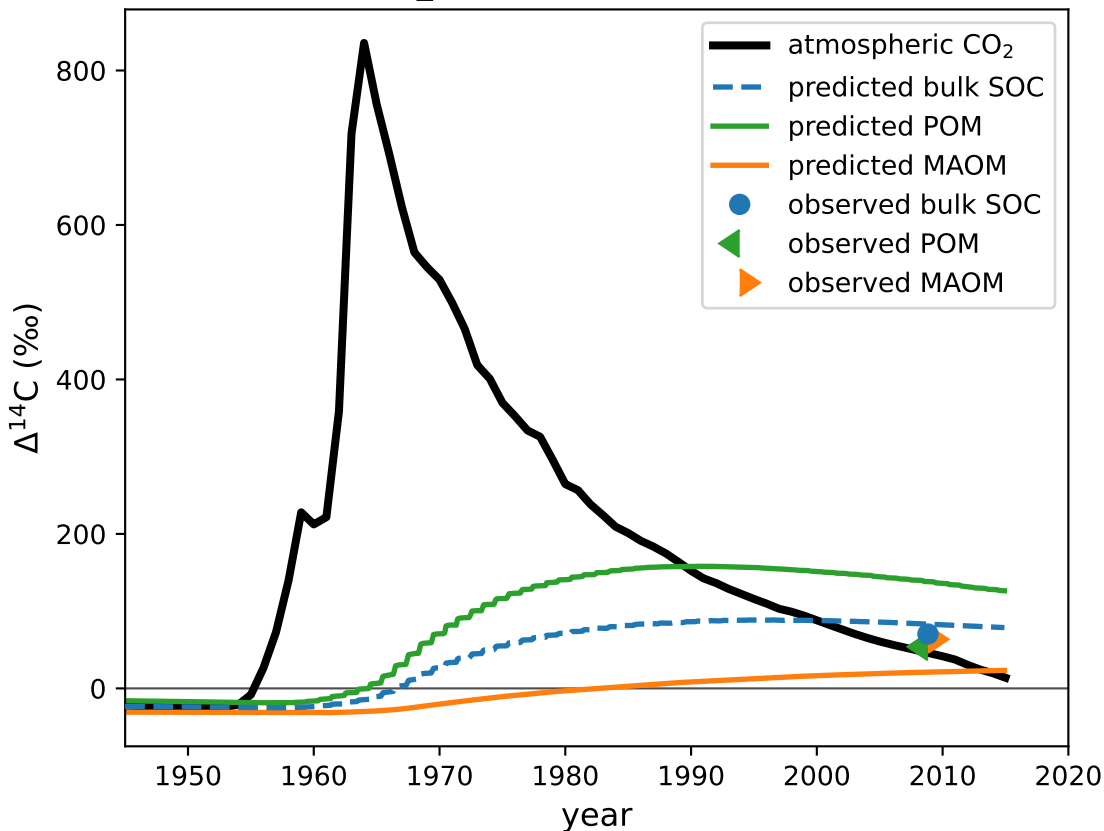

Supplement: Supplementary file 299 [file gmd-2023-242-supplement.zip]

SOMic  
Rasmussen\_2018, ANwf, ANwf

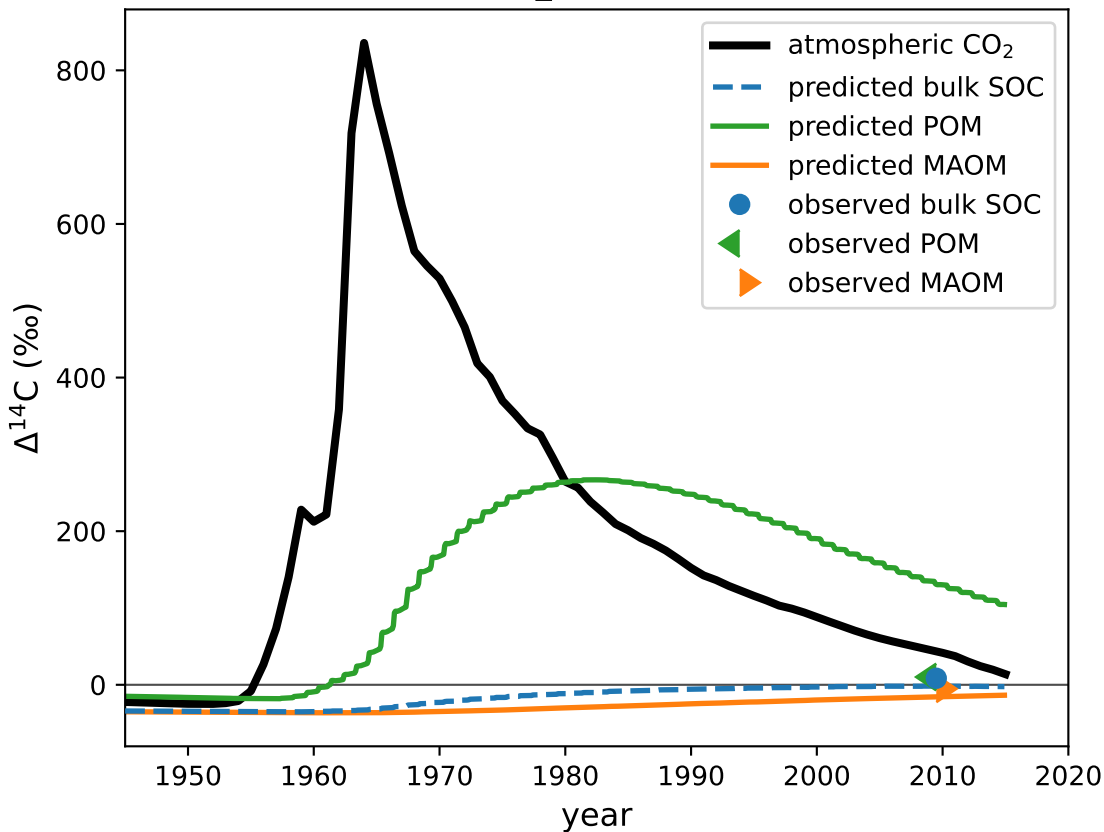

Supplement: Supplementary file 300 [file gmd-2023-242-supplement.zip]

CORPSE  
McFarlane\_2013, MA Harvard Forest, H3

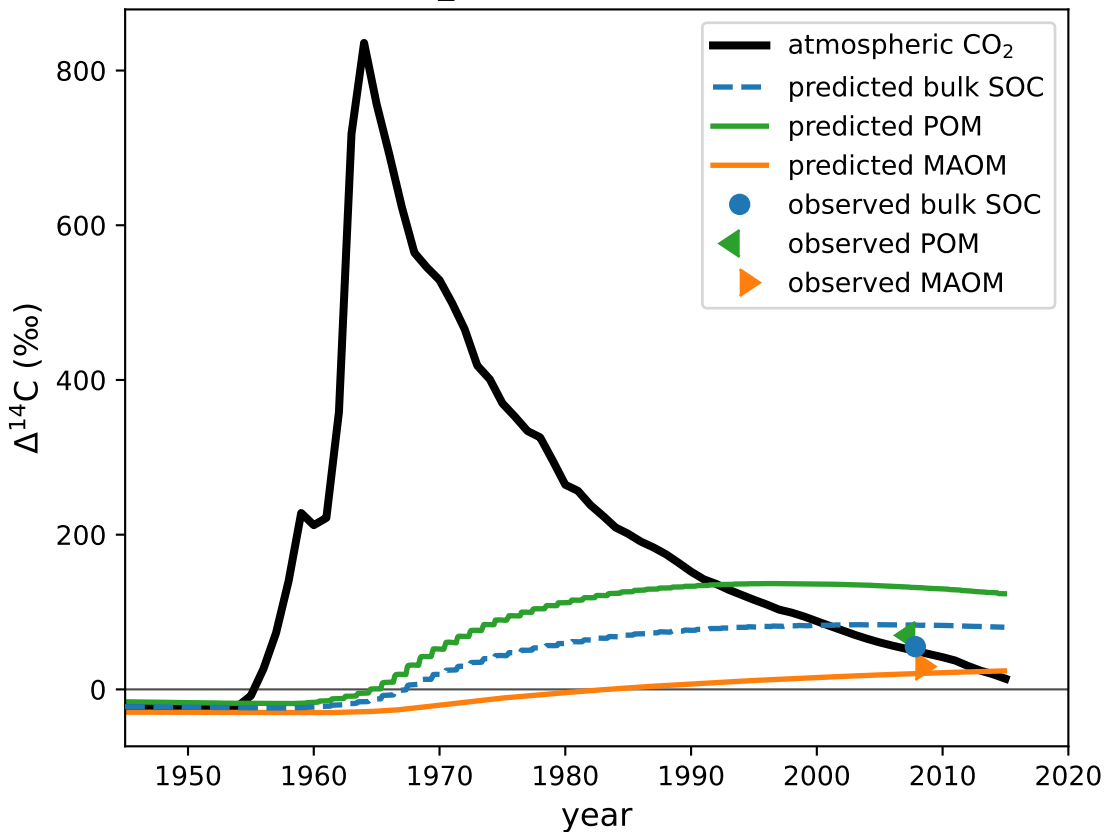

Supplement: Supplementary file 301 [file gmd-2023-242-supplement.zip]

# CORPSE

Lybrand\_2017, Catalina CZO ponderosa, ponderosa pine\_convergen

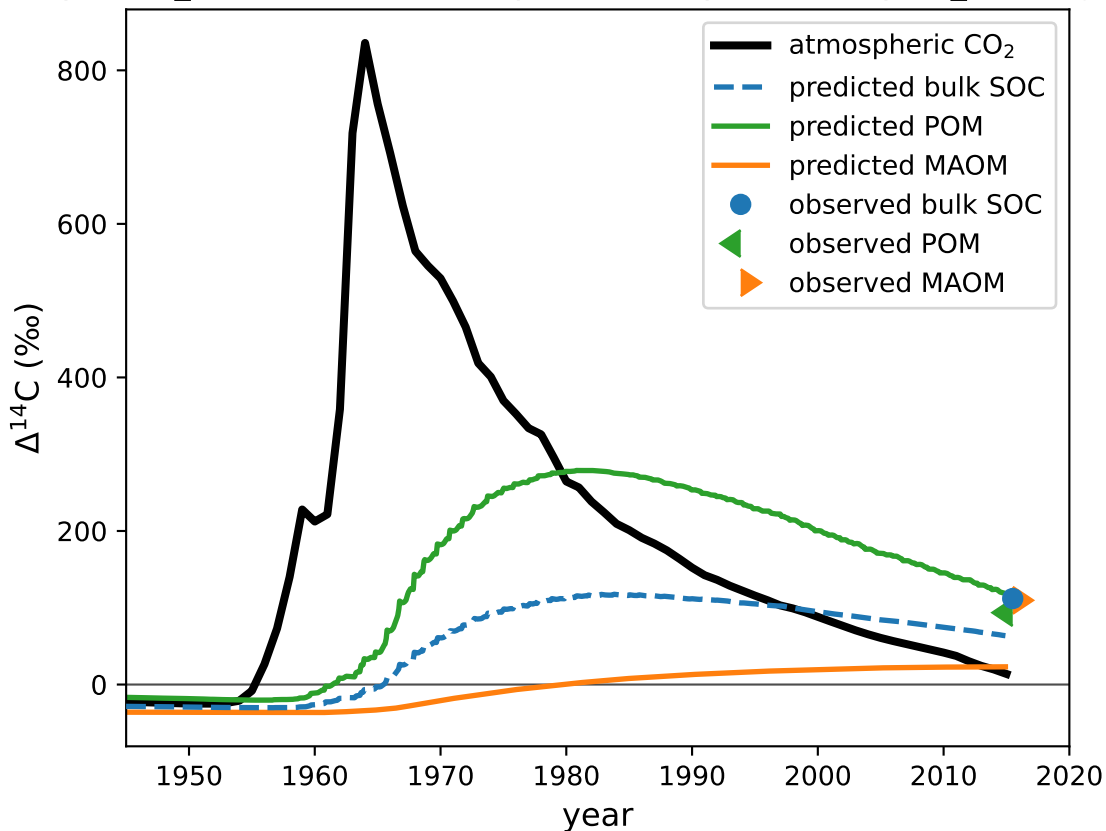

Supplement: Supplementary file 302 [file gmd-2023-242-supplement.zip]

MEND  
Heckman\_2010, Chiricahua Rhyolite, CHRY\_composite

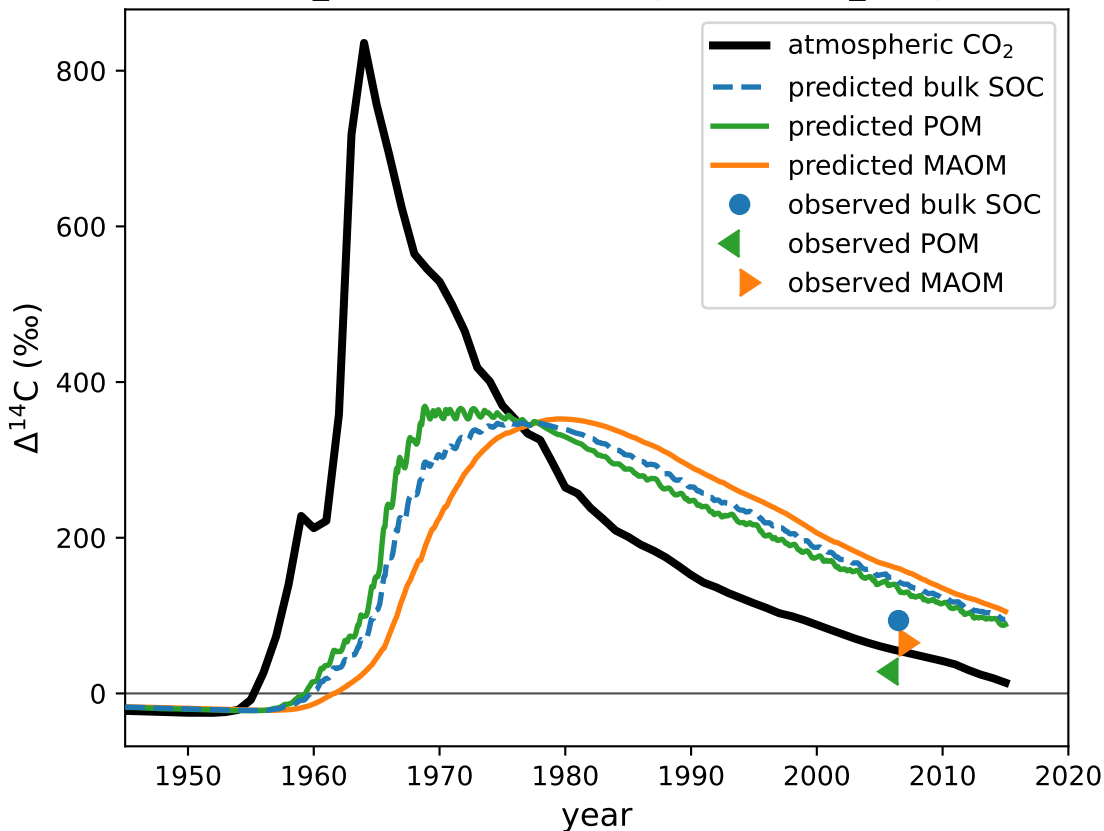

Supplement: Supplementary file 303 [file gmd-2023-242-supplement.zip]

SOMic  
McFarlane\_2013, MI-Coarse UMBS, D4

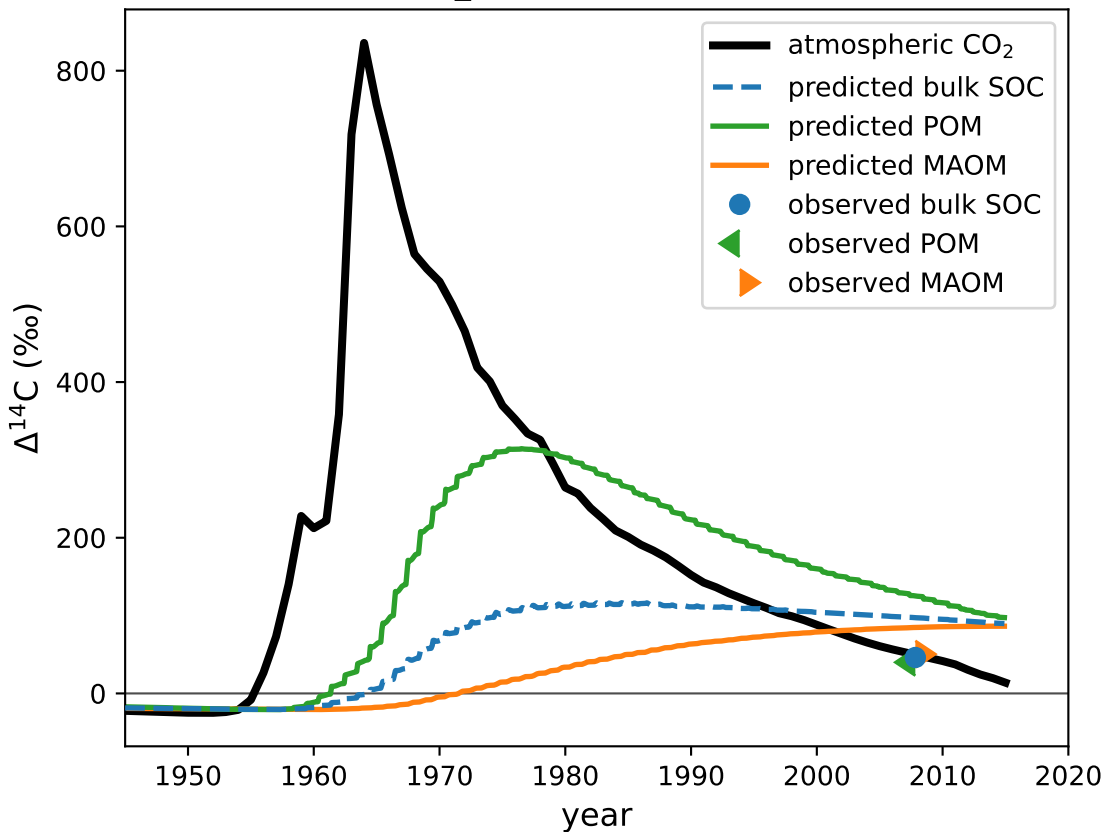

Supplement: Supplementary file 304 [file gmd-2023-242-supplement.zip]

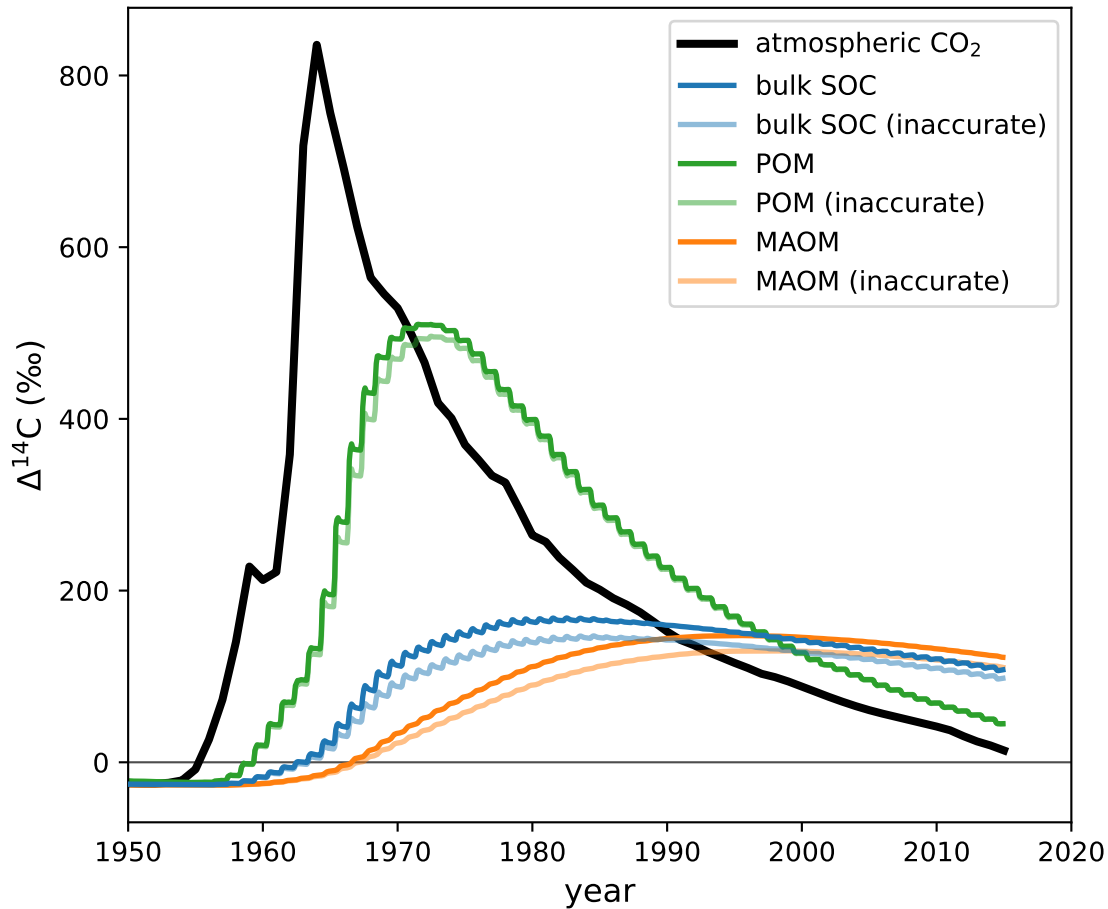

Supplement: Supplementary file 305 [file gmd-2023-242-supplement.zip]

SOMic  
McFarlane\_2013, Mi-Fine Colonial Point, C1

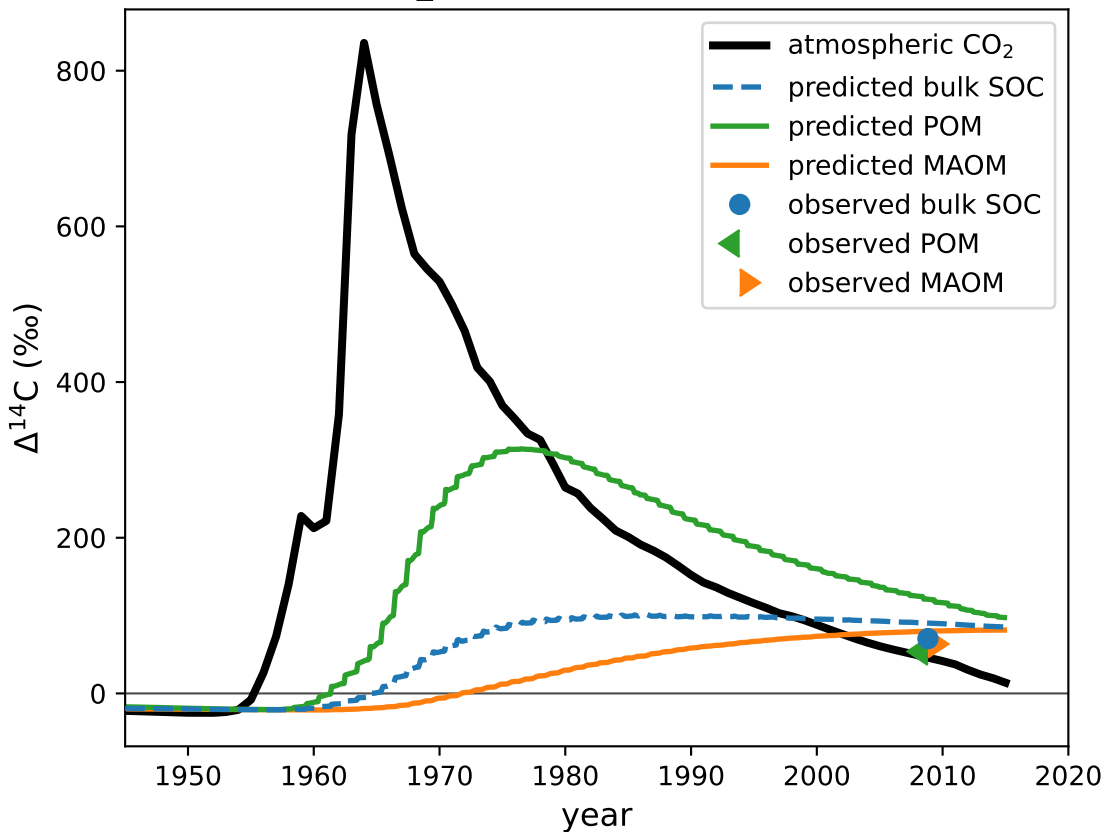

Supplement: Supplementary file 306 [file gmd-2023-242-supplement.zip]

SOMic  
McFarlane\_2013, MI-Coarse UMBS, G3

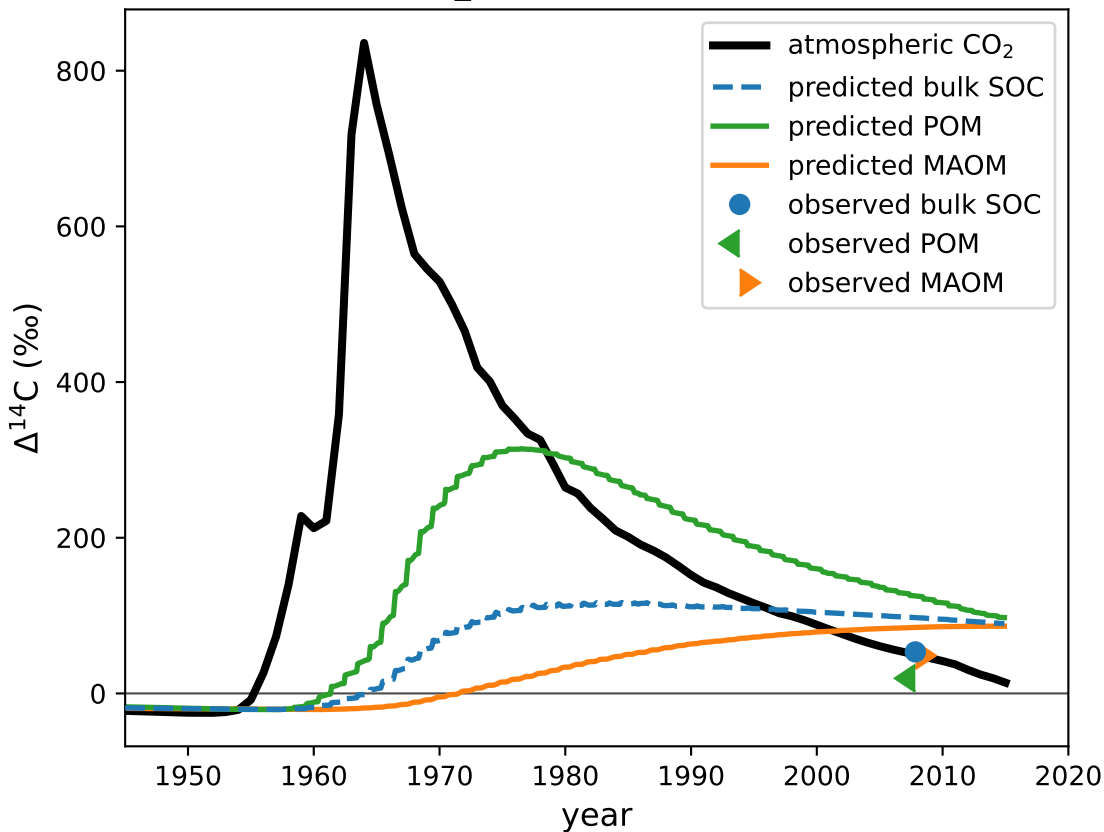

Supplement: Supplementary file 307 [file gmd-2023-242-supplement.zip]

(a) Total SOC stocks

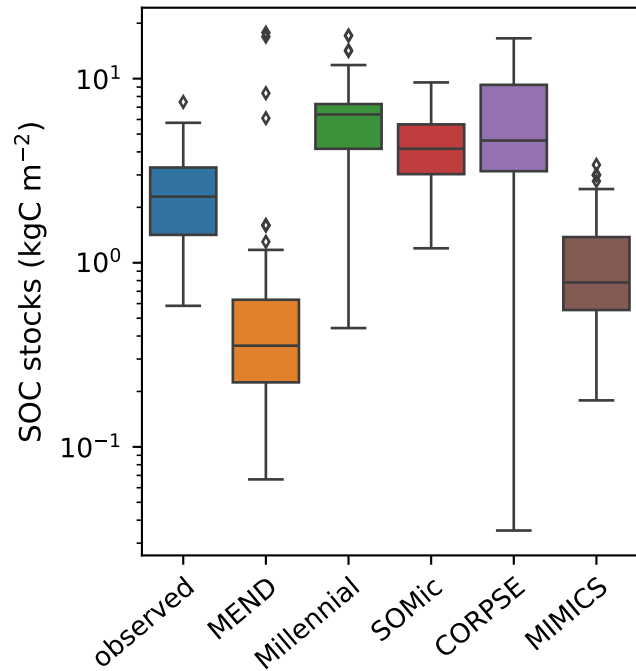

(b) POM contribution

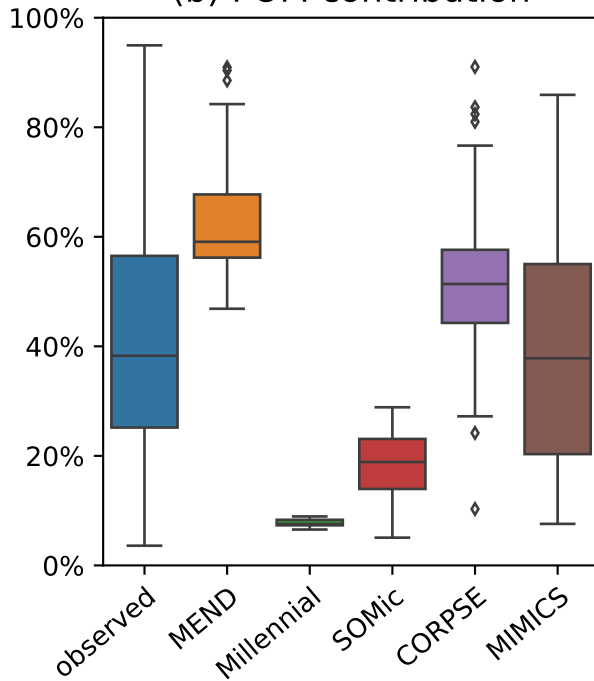

(c) MAOM contribution

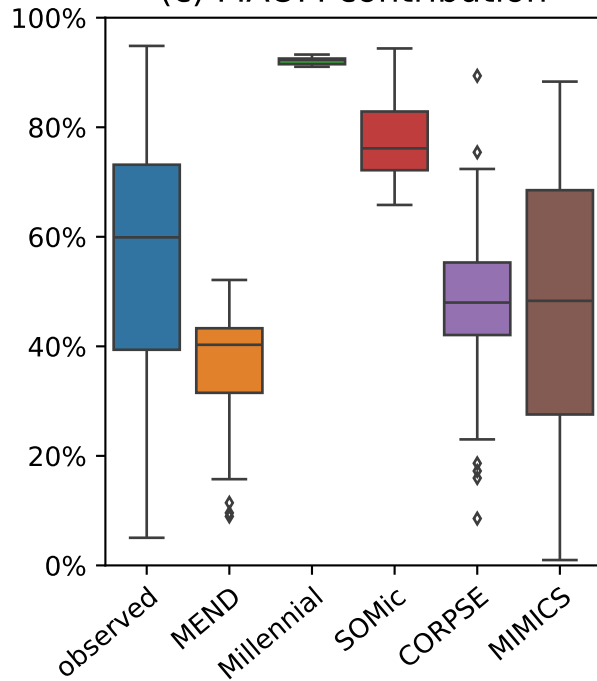

Supplement: Supplementary file 308 [file gmd-2023-242-supplement.zip]

MIMICS  
McFarlane\_2013, Mi-Fine Colonial Point, C4

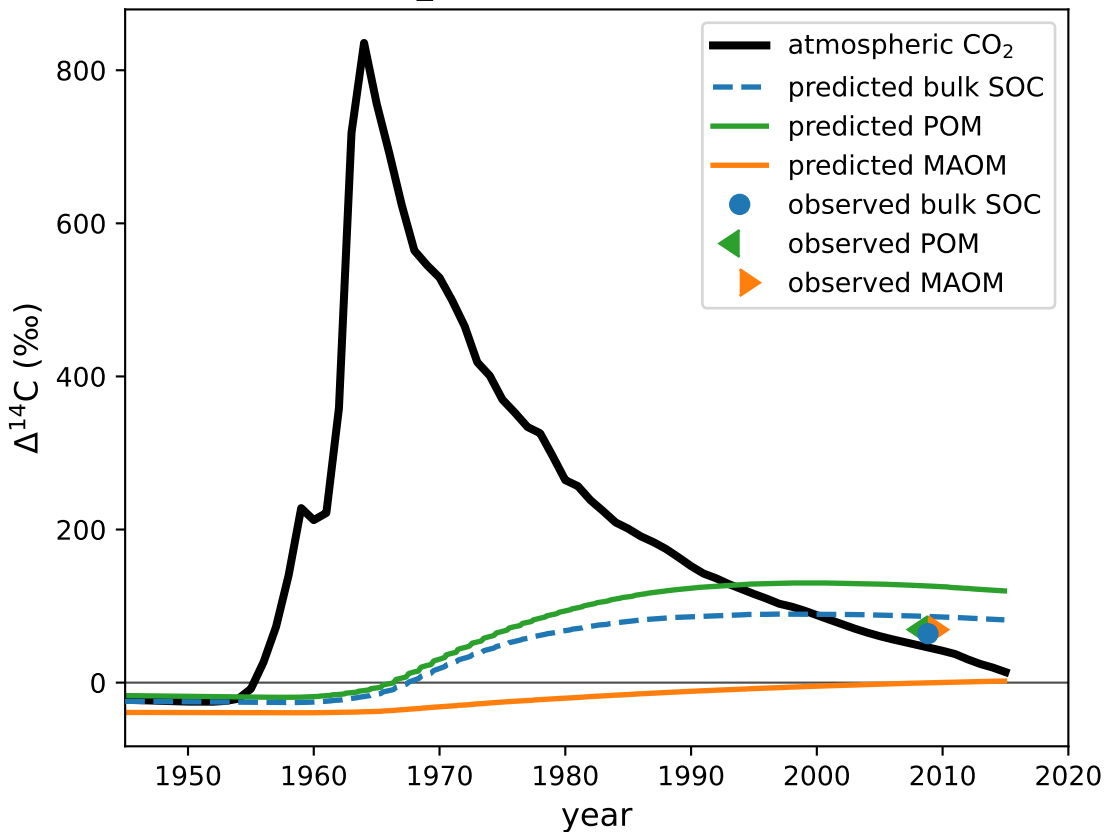

Supplement: Supplementary file 309 [file gmd-2023-242-supplement.zip]

Millennial  
Lybrand\_2017, Catalina CZO desert, desert scrub\_divergent

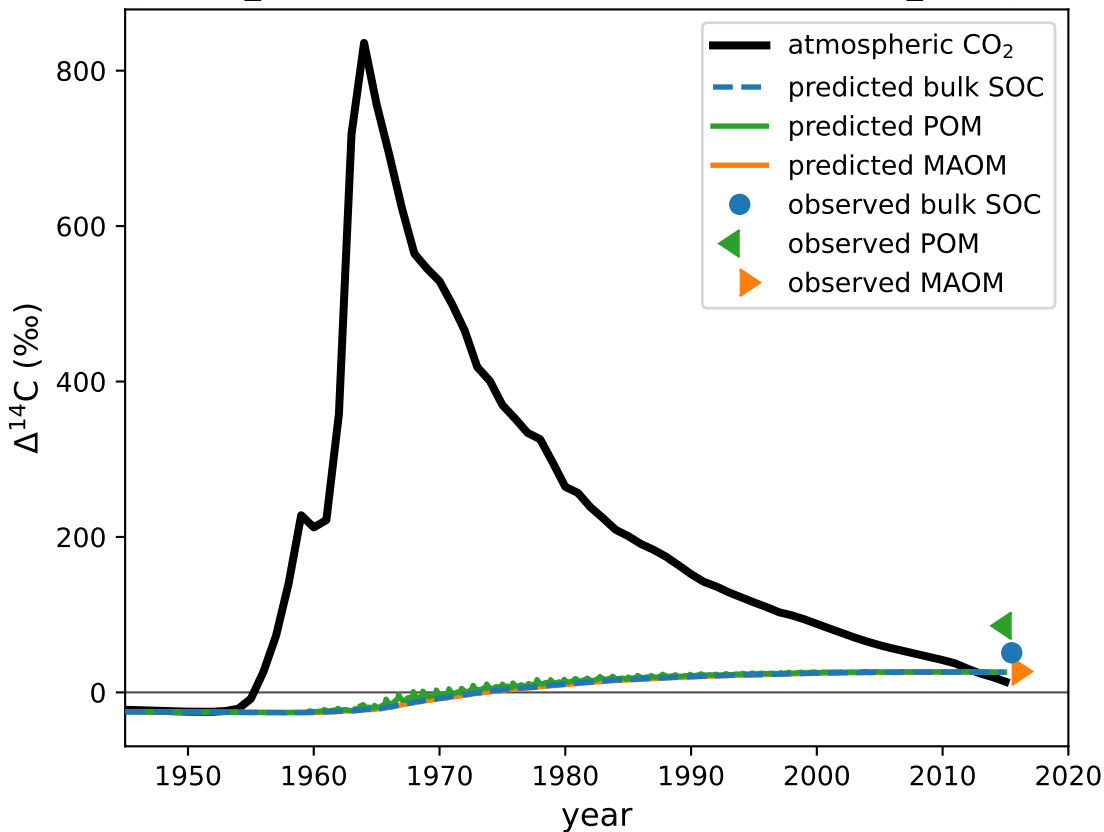

Supplement: Supplementary file 310 [file gmd-2023-242-supplement.zip]
