# Supplementary figures and images for: Radiocarbon analysis reveals underestimation of soil organic carbon persistence in new-generation soil models (part 4 of 4)
Source: Copernicus journal article supplement (doi:10.5194/gmd-2023-242), 2024-01-19

MEND  
Meyer\_2012, Matsch, Abandoned

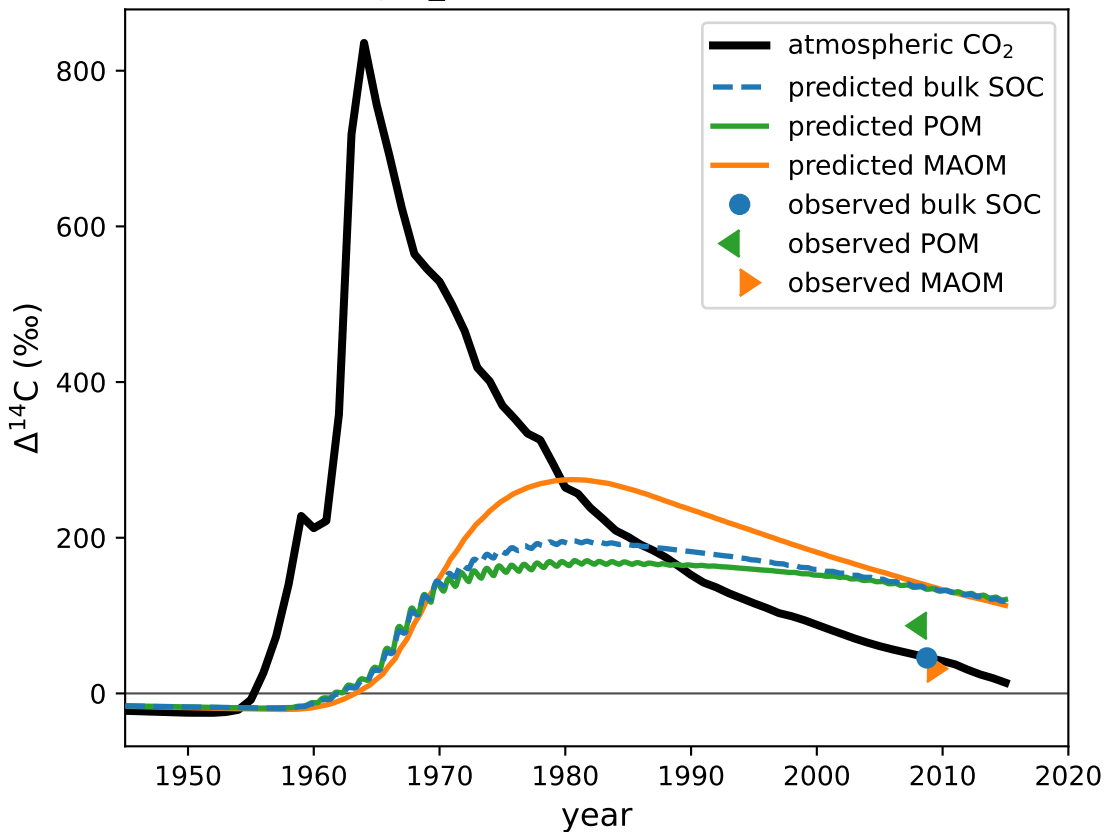

Supplement: Supplementary file 311 [file gmd-2023-242-supplement.zip]

SOMic

Lybrand\_2017, Catalina CZO desert, desert scrub\_divergent

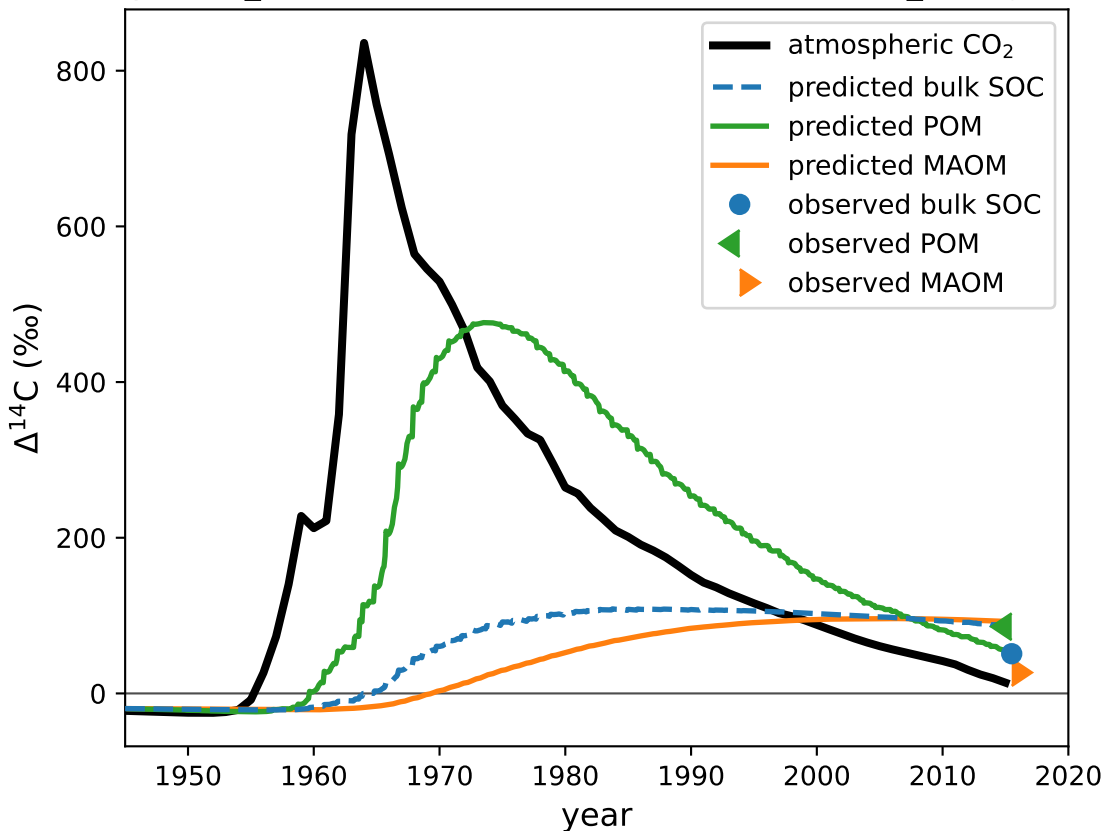

Supplement: Supplementary file 312 [file gmd-2023-242-supplement.zip]

# MIMICS

Lybrand\_2017, Catalina CZO desert, desert scrub\_divergent

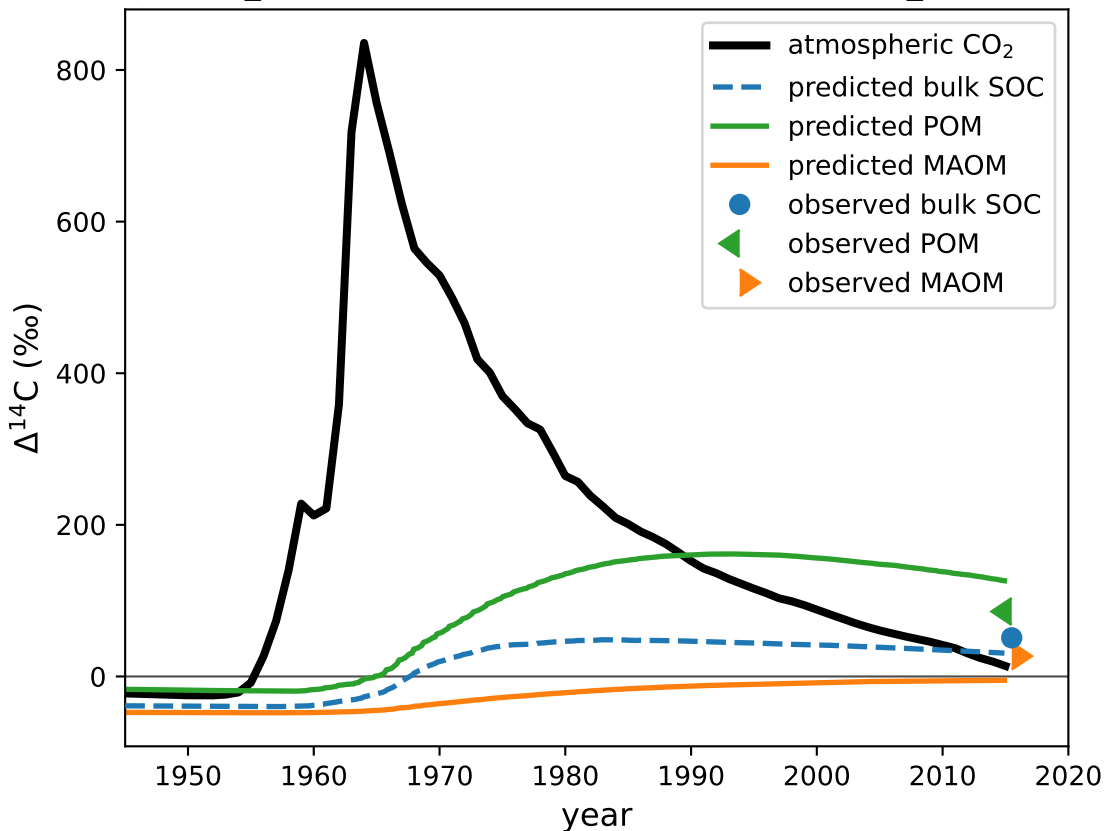

Supplement: Supplementary file 314 [file gmd-2023-242-supplement.zip]

CORPSE  
Rasmussen\_2018, BSpp, BSpp

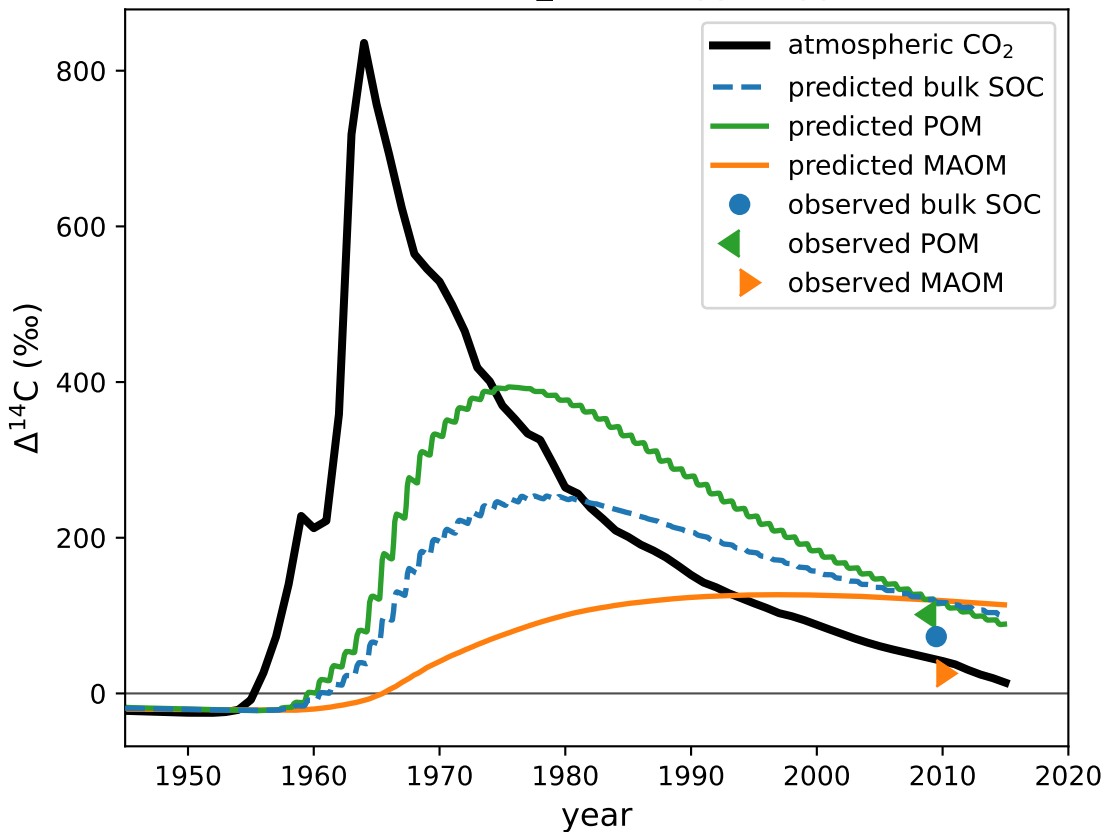

Supplement: Supplementary file 315 [file gmd-2023-242-supplement.zip]

SOMic  
Heckman\_2018, HI\_Andisol, WPL1204

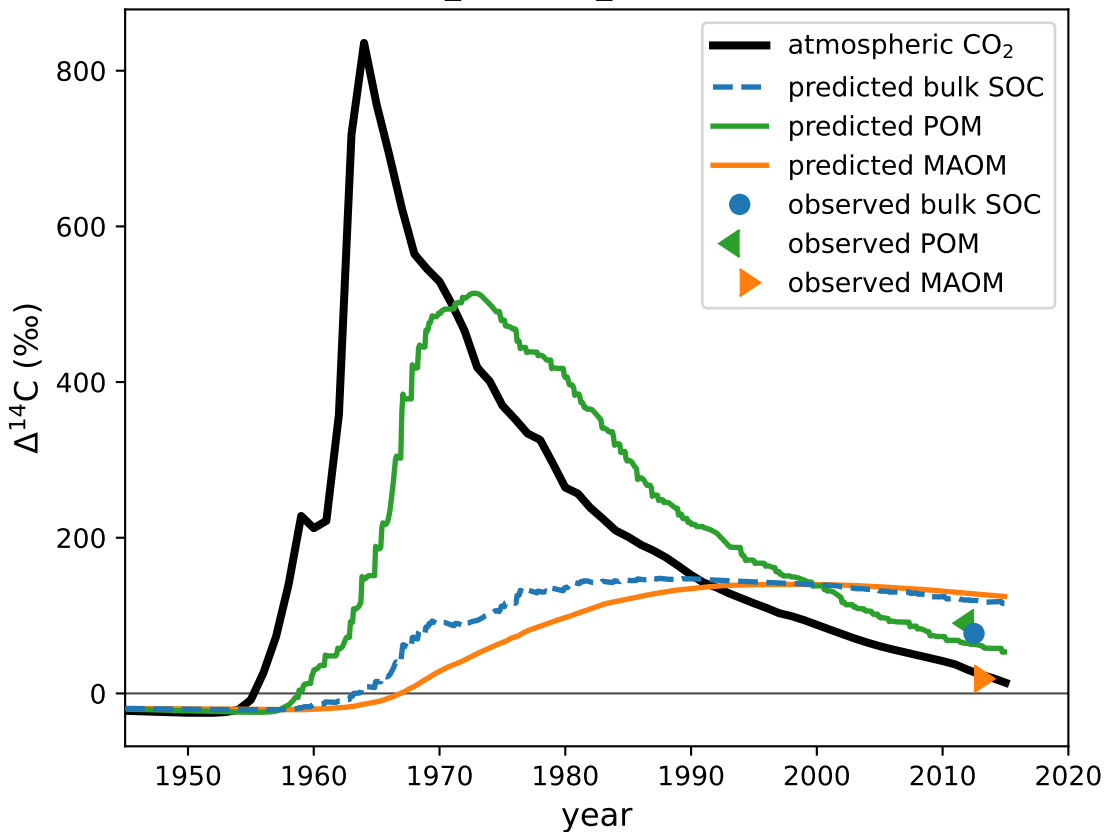

Supplement: Supplementary file 316 [file gmd-2023-242-supplement.zip]

SOMic  
McFarlane\_2013, NH Bartlett Forest, B1

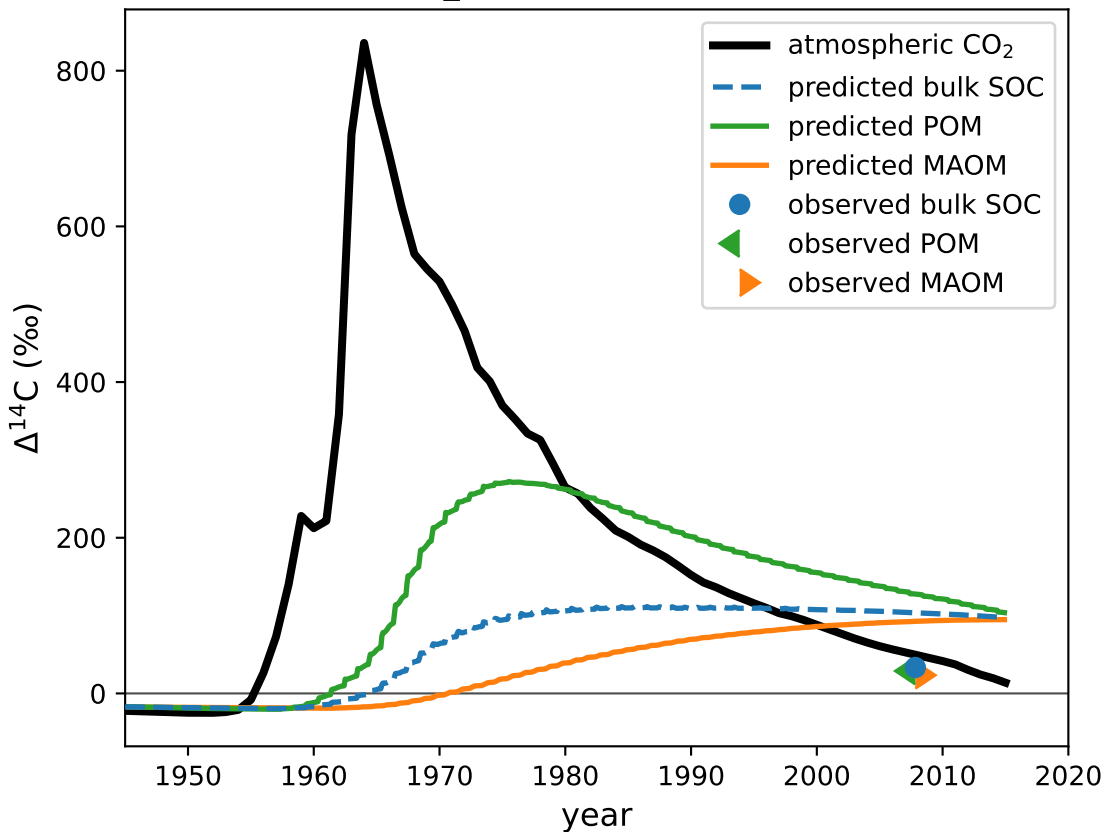

Supplement: Supplementary file 317 [file gmd-2023-242-supplement.zip]

Millennial  
Meyer\_2012, Stubai, Pasture

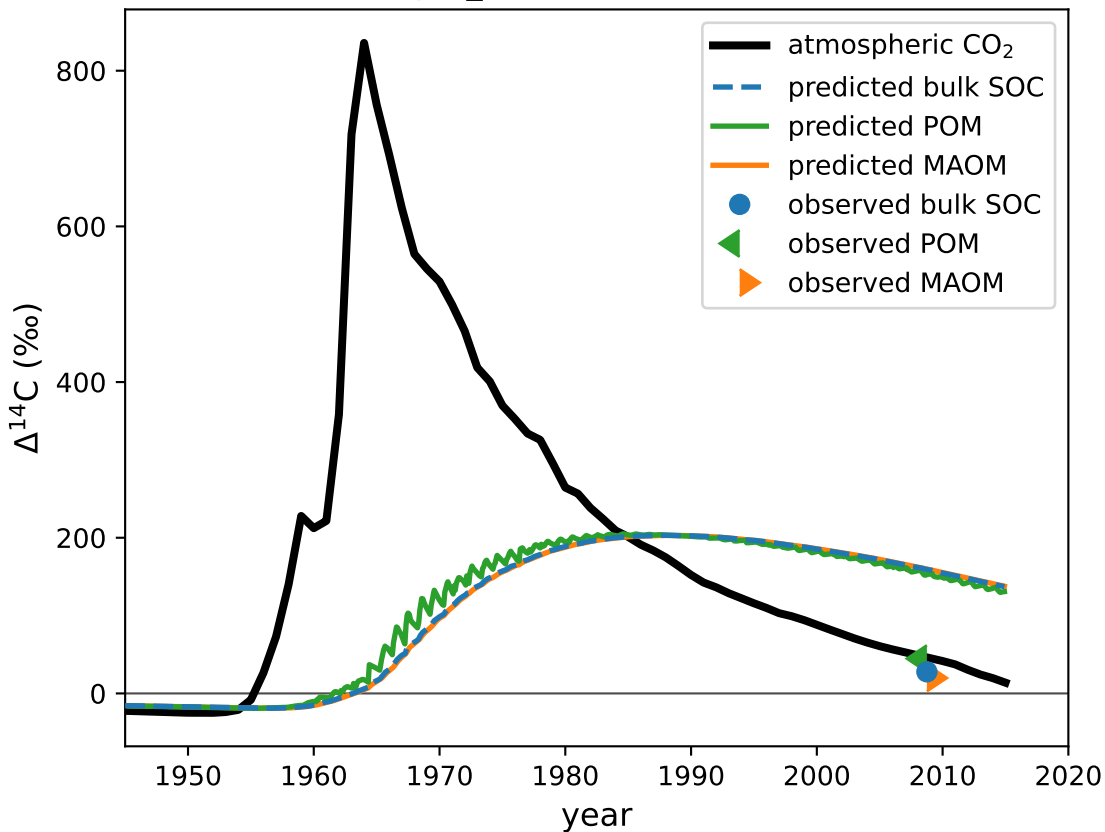

Supplement: Supplementary file 318 [file gmd-2023-242-supplement.zip]

# MIMICS

Marin-Spiotta\_2008, Sierra de Cayey, 20yr secondary forest

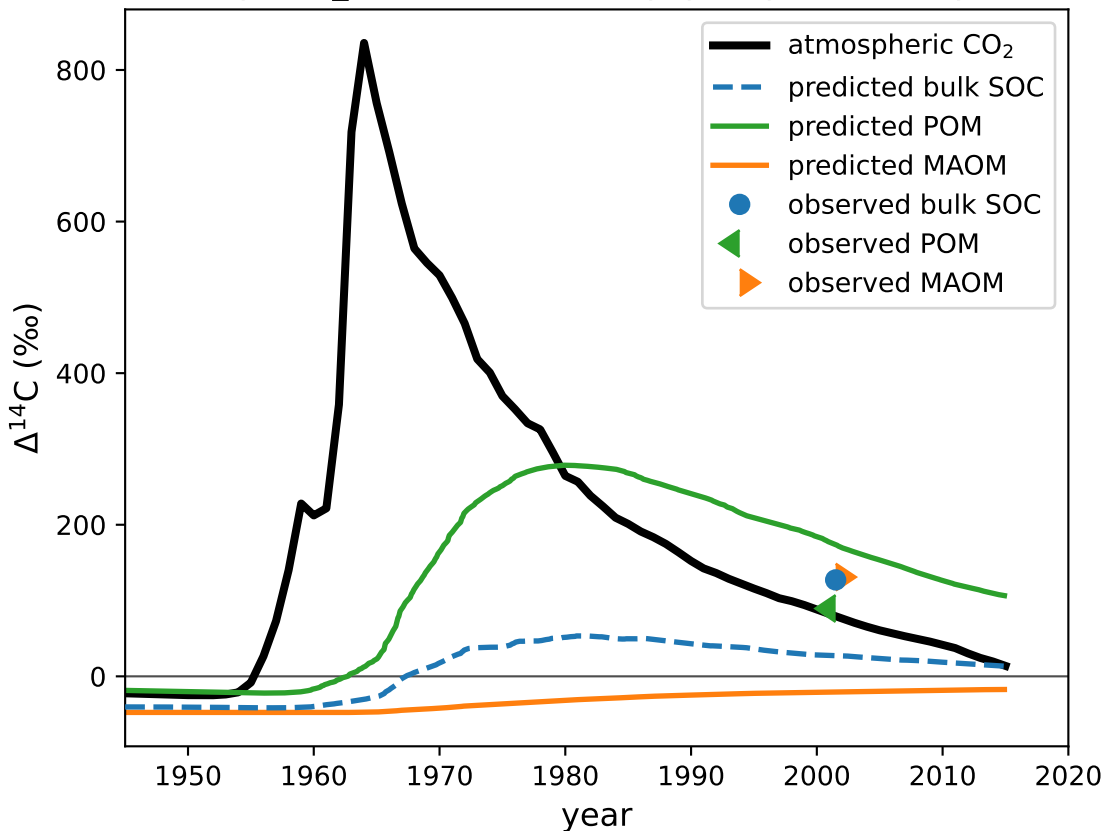

Supplement: Supplementary file 319 [file gmd-2023-242-supplement.zip]

MIMICS  
McFarlane\_2013, MA Harvard Forest, H4

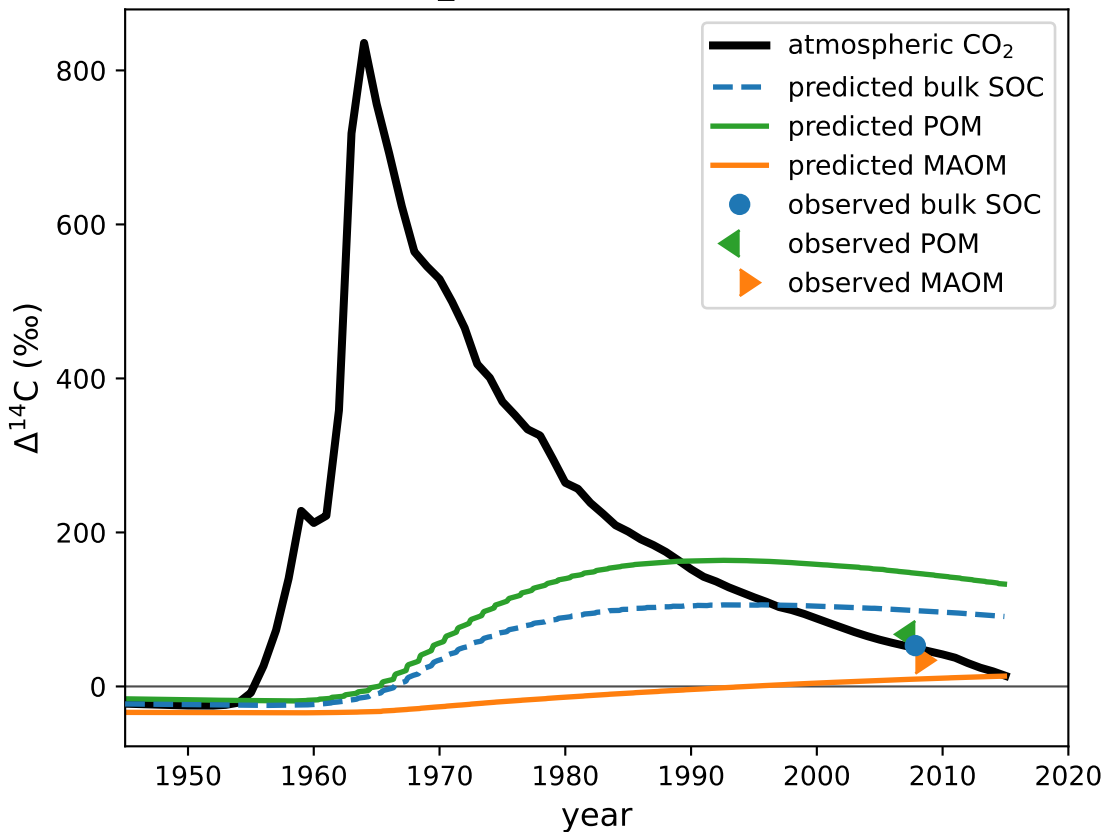

Supplement: Supplementary file 320 [file gmd-2023-242-supplement.zip]

SOMic  
Schrumpf\_2013, Grignon, Grignon.1

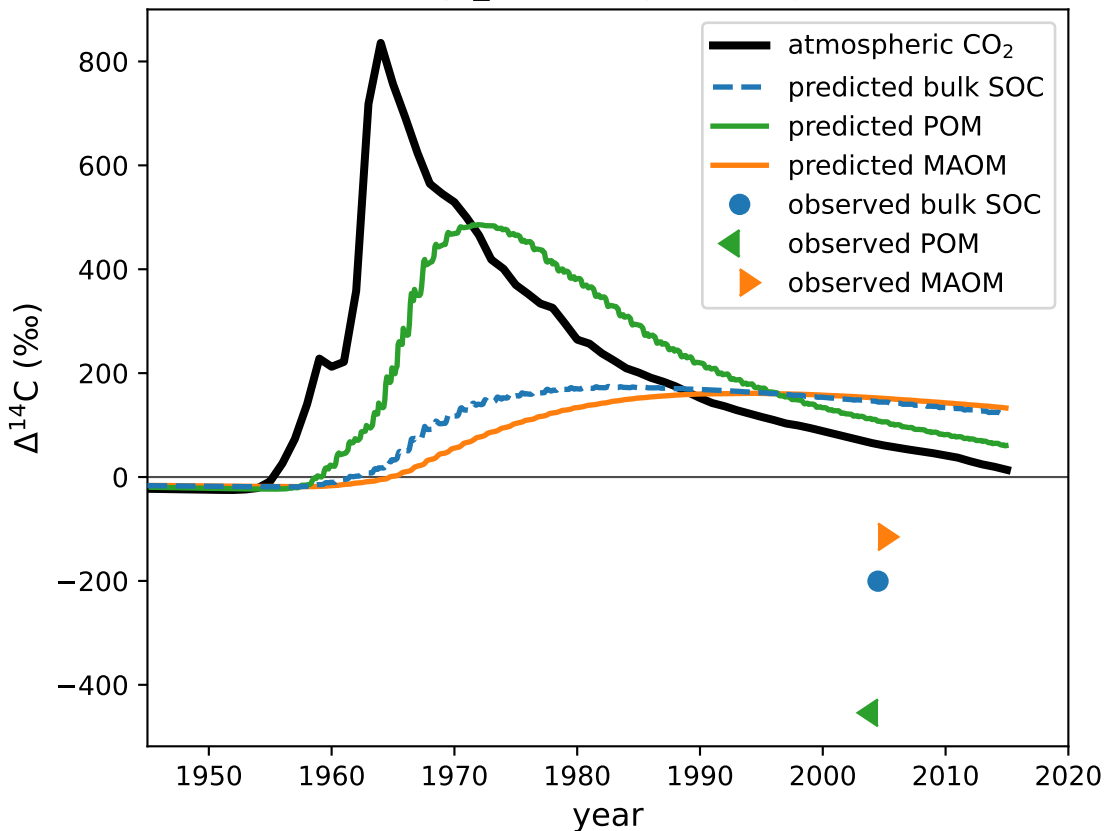

Supplement: Supplementary file 321 [file gmd-2023-242-supplement.zip]

# Millennial

Lybrand\_2017, Catalina CZO ponderosa, ponderosa pine\_convergen

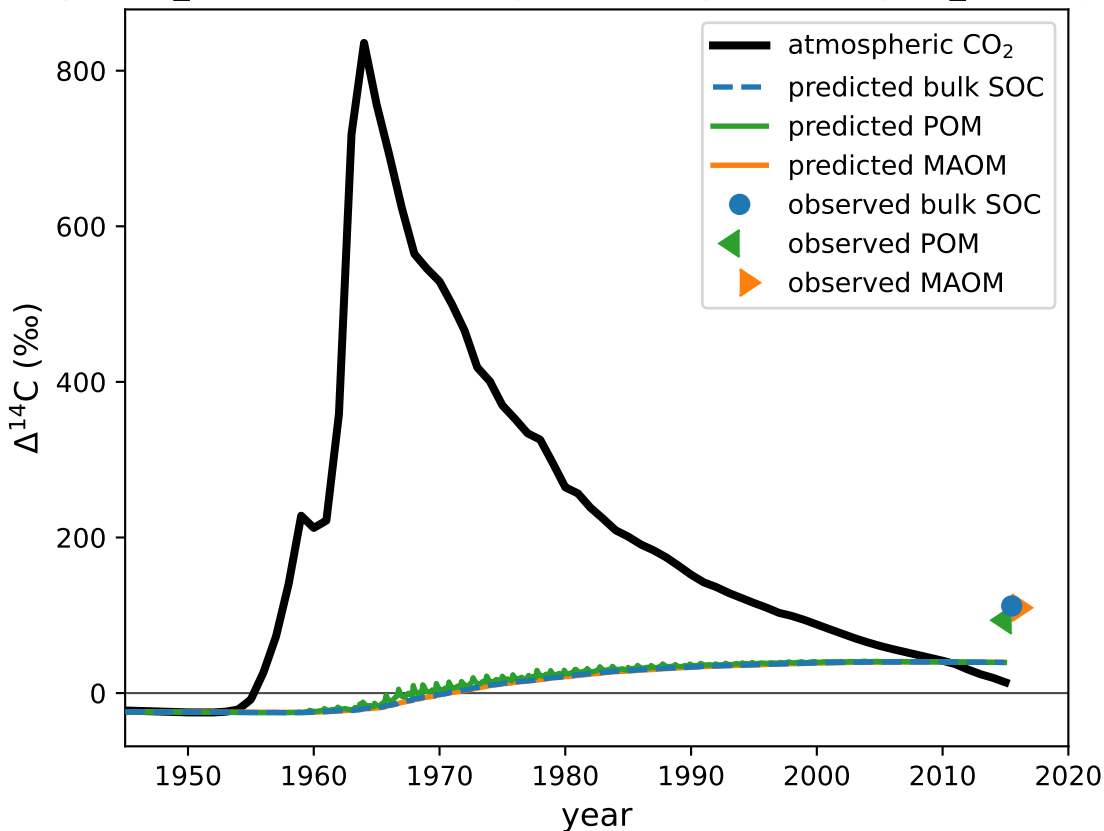

Supplement: Supplementary file 322 [file gmd-2023-242-supplement.zip]

SOMic  
McFarlane\_2013, Mi-Fine Colonial Point, C2

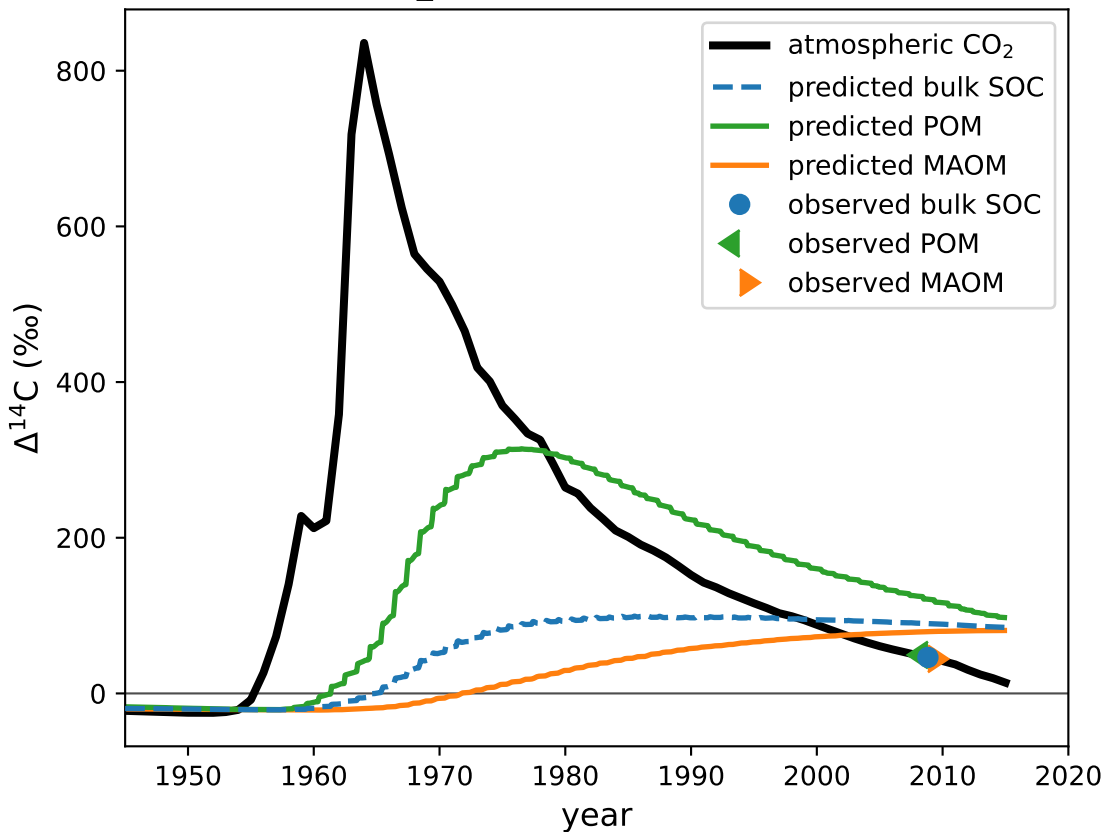

Supplement: Supplementary file 323 [file gmd-2023-242-supplement.zip]

SOMic  
McFarlane\_2013, NH Bartlett Forest, B4

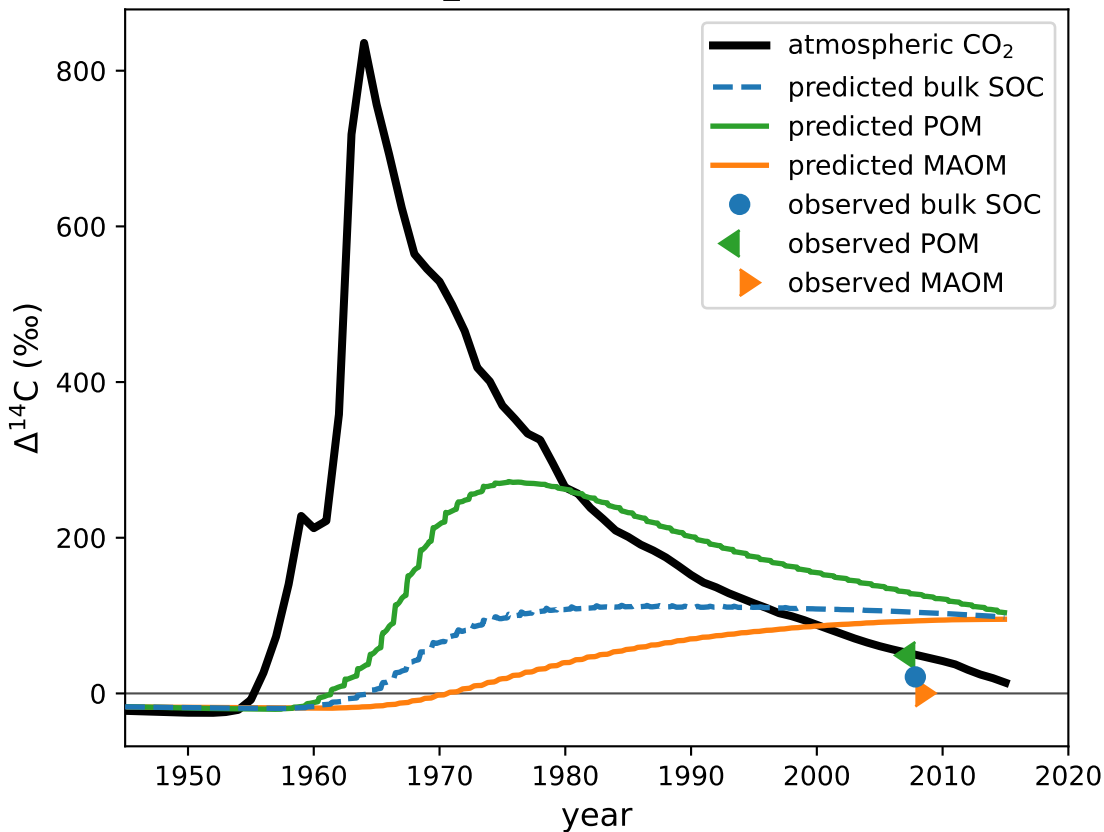

Supplement: Supplementary file 324 [file gmd-2023-242-supplement.zip]

MIMICS  
McFarlane\_2013, MA Harvard Forest, H1

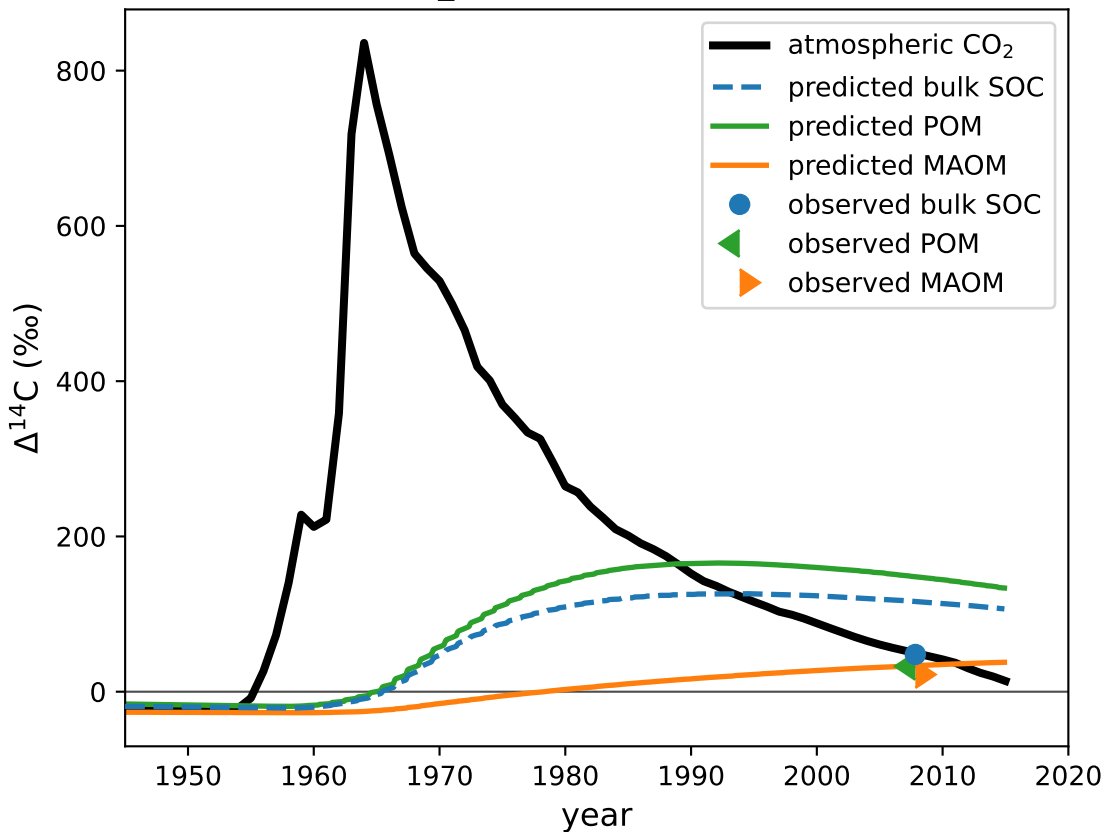

Supplement: Supplementary file 325 [file gmd-2023-242-supplement.zip]

Millennial  
Heckman\_2018, AZ\_Mollisol, Basalt

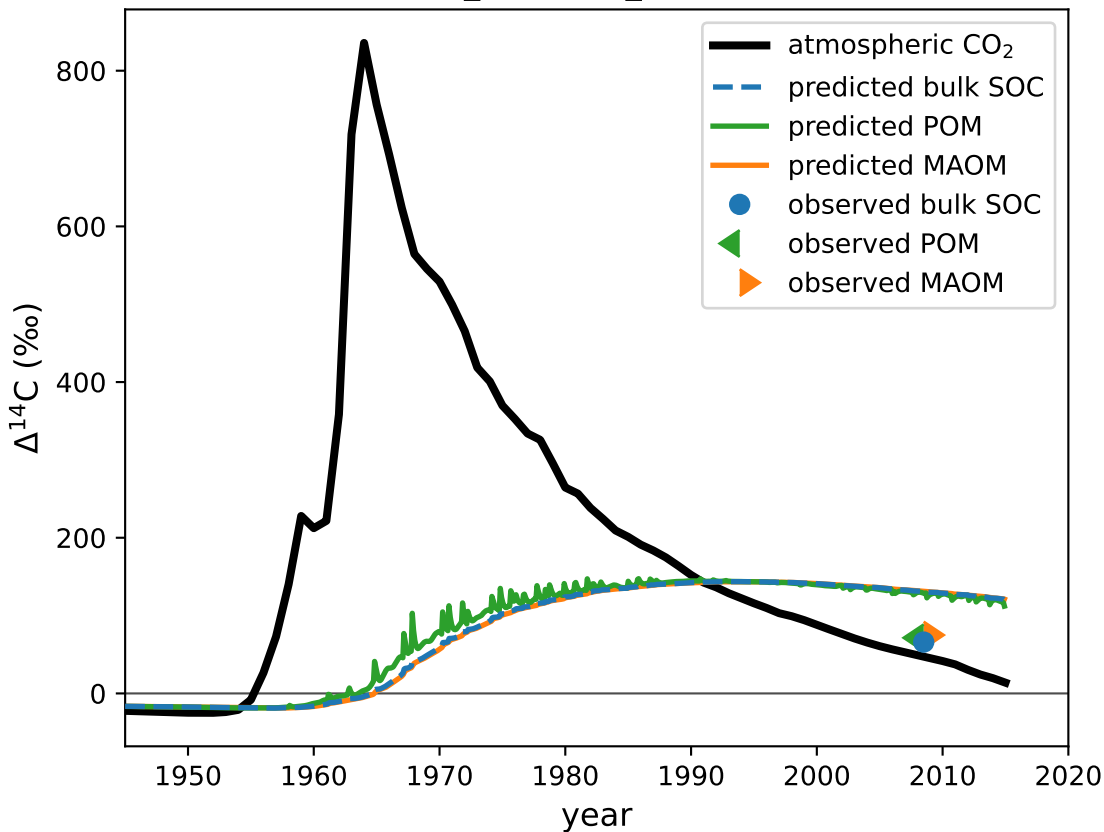

Supplement: Supplementary file 326 [file gmd-2023-242-supplement.zip]

Millennial  
McFarlane\_2013, MO Ozark BREA, M5

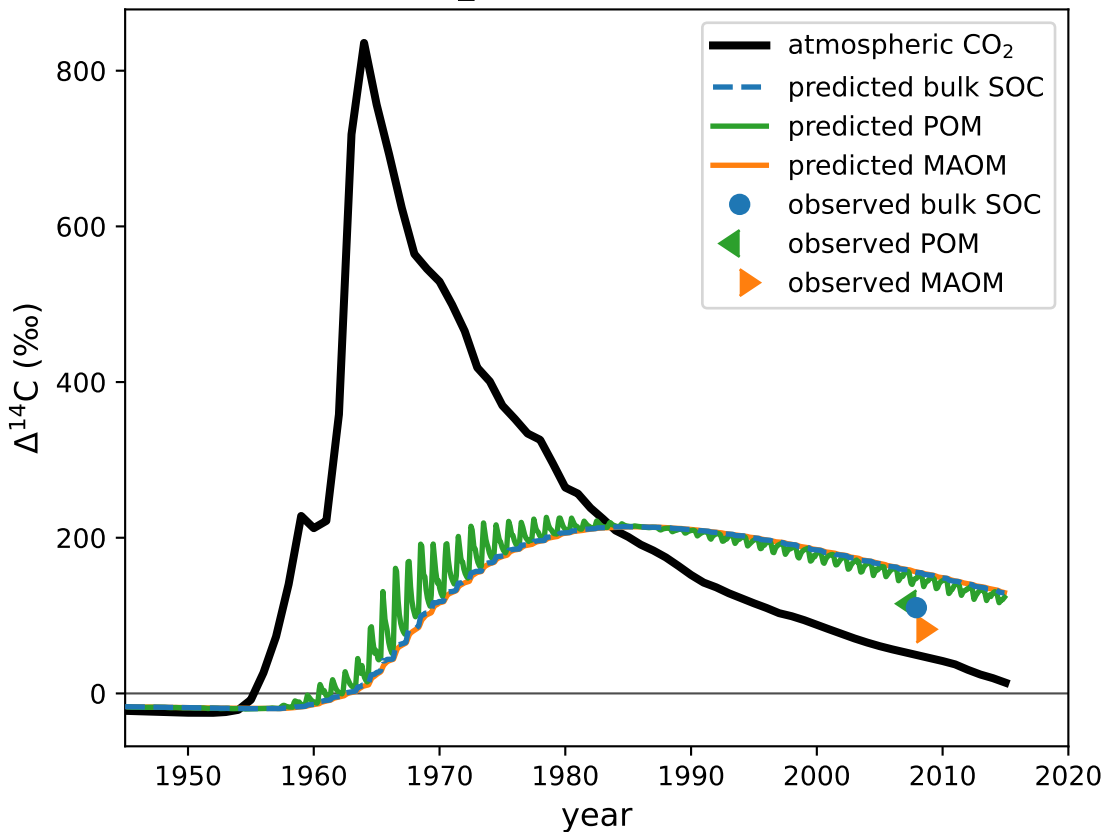

Supplement: Supplementary file 327 [file gmd-2023-242-supplement.zip]

MIMICS  
Meyer\_2012, Matsch, Abandoned

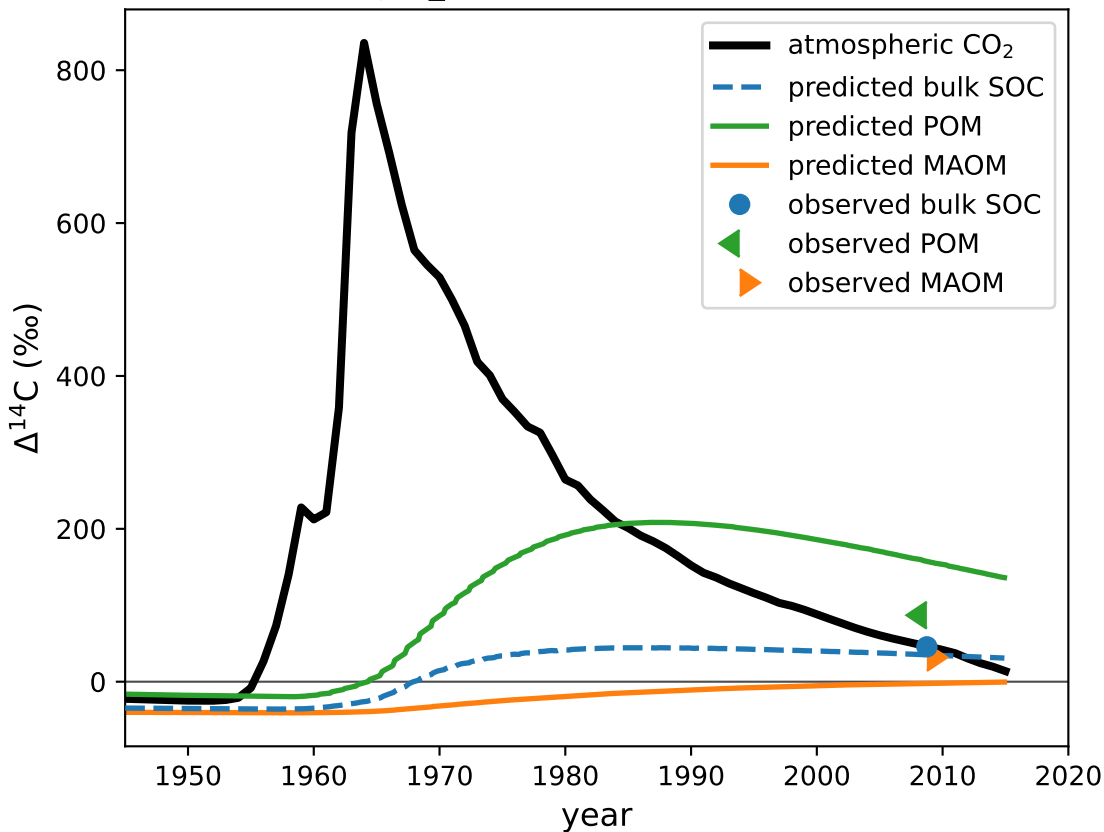

Supplement: Supplementary file 328 [file gmd-2023-242-supplement.zip]

MIMICS  
Heckman\_2010, Mt. Lemmon Granite, MLGR\_composite

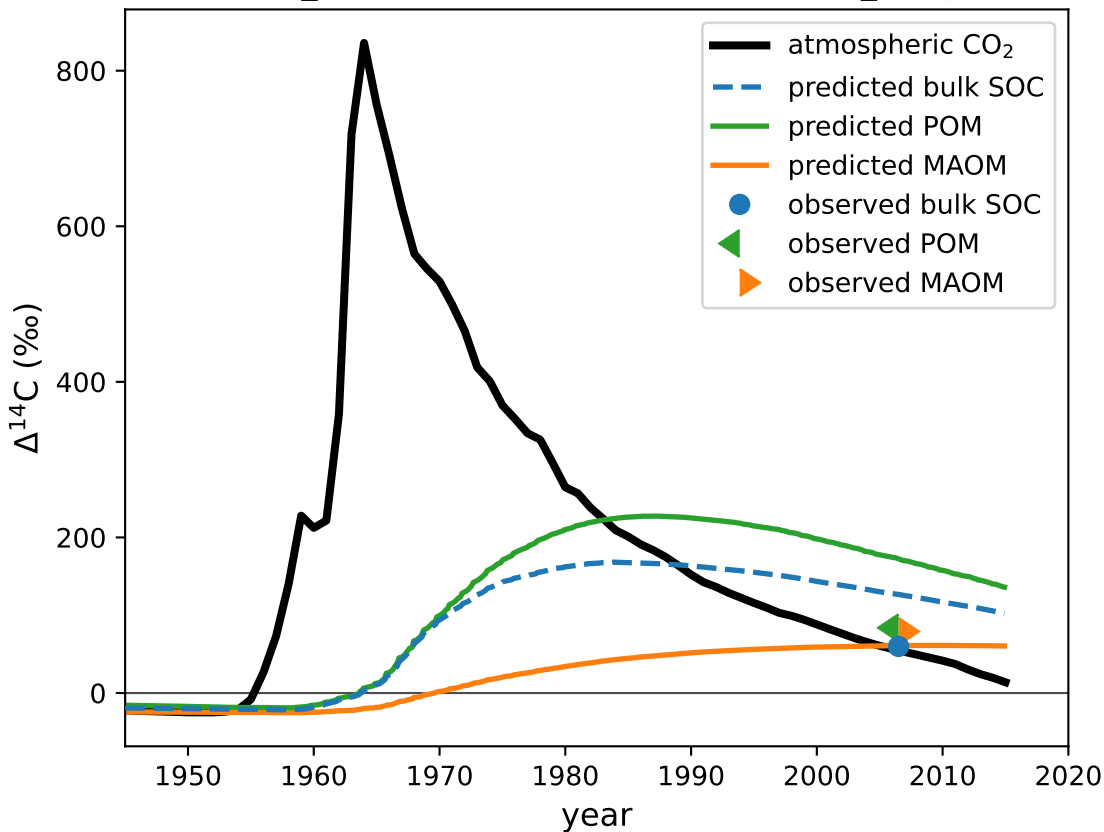

Supplement: Supplementary file 329 [file gmd-2023-242-supplement.zip]

CORPSE  
Berhe\_2012, Tennessee Valley, plain comp

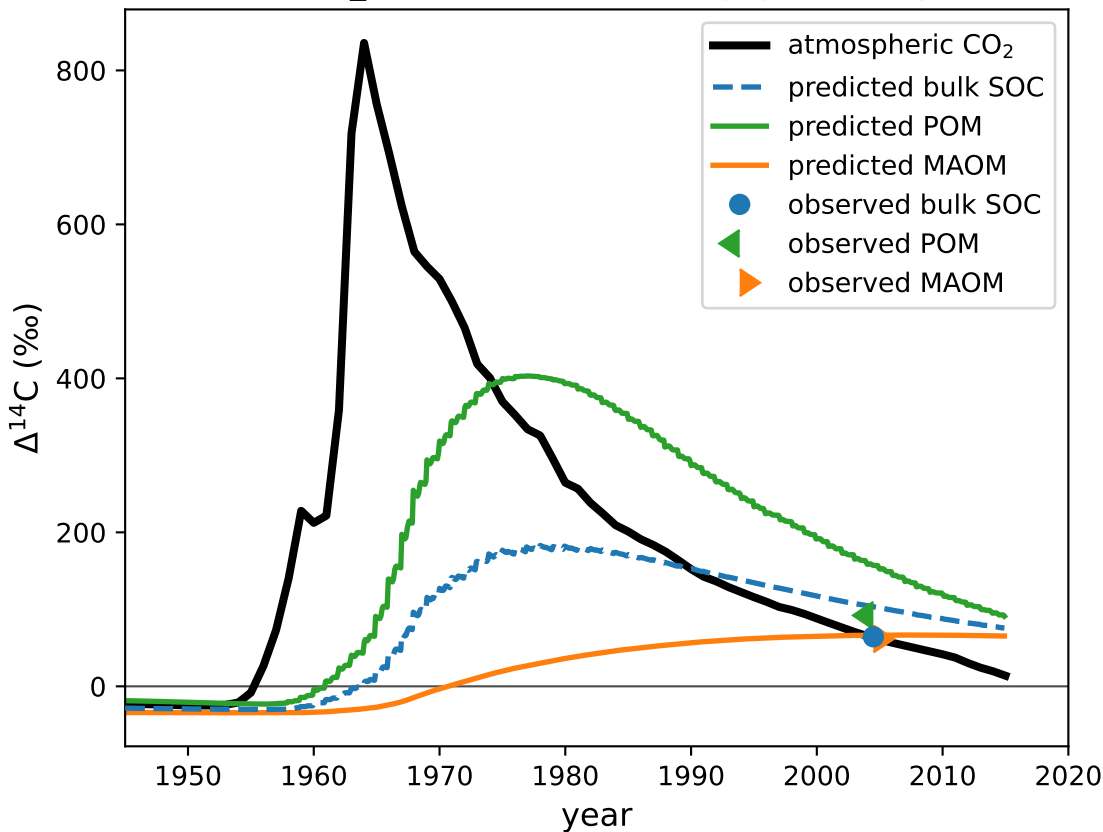

Supplement: Supplementary file 330 [file gmd-2023-242-supplement.zip]

# CORPSE

Lybrand\_2017, Catalina CZO conifer, mixed conifer\_convergent

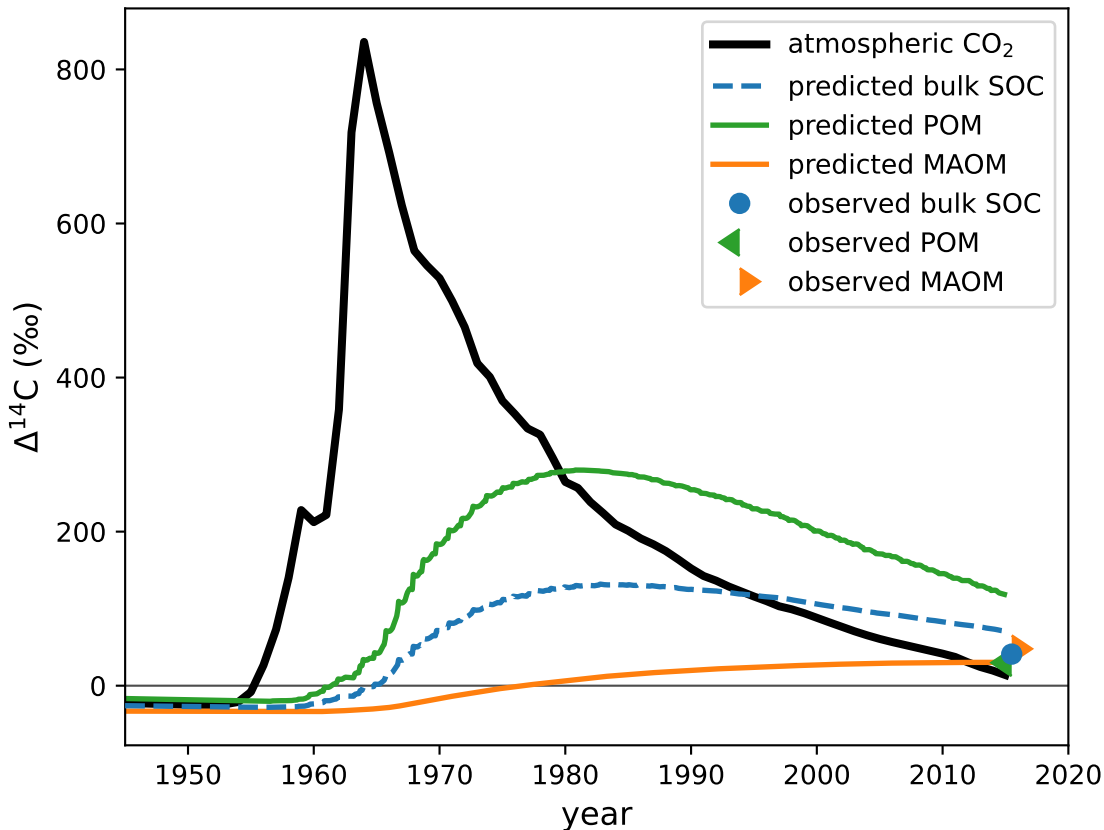

Supplement: Supplementary file 331 [file gmd-2023-242-supplement.zip]

Millennial  
Marin-Spiotta\_2008, Sierra de Cayey, 30yr secondary forest

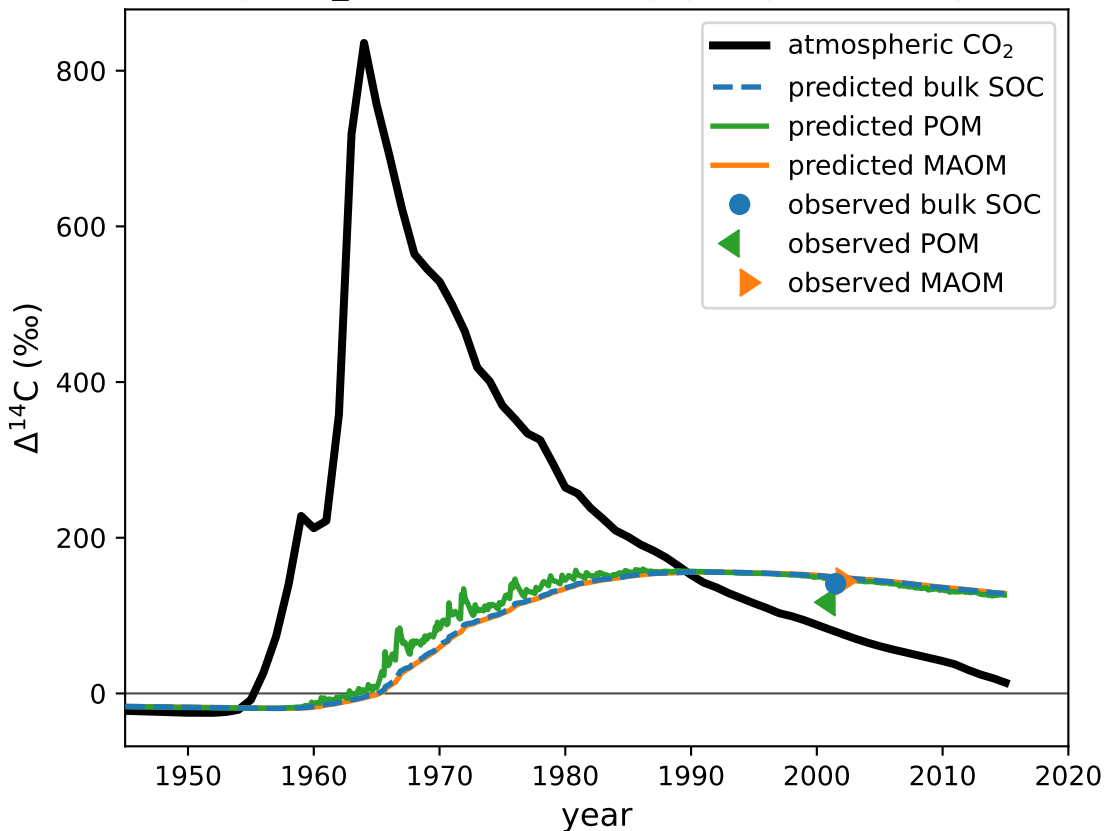

Supplement: Supplementary file 333 [file gmd-2023-242-supplement.zip]

CORPSE  
Lybrand\_2017, Catalina CZO desert, desert scrub\_convergent

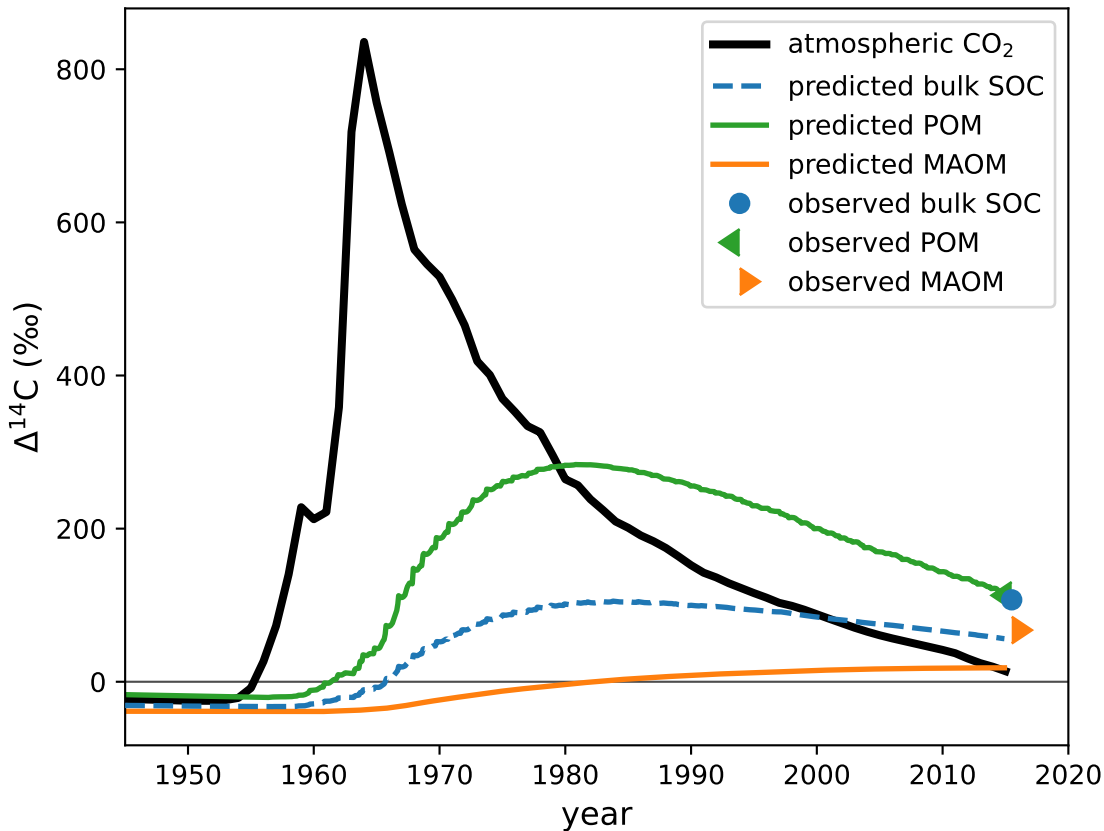

Supplement: Supplementary file 334 [file gmd-2023-242-supplement.zip]

Millennial  
Schrumpf\_2013, Sorø, Sorø.1

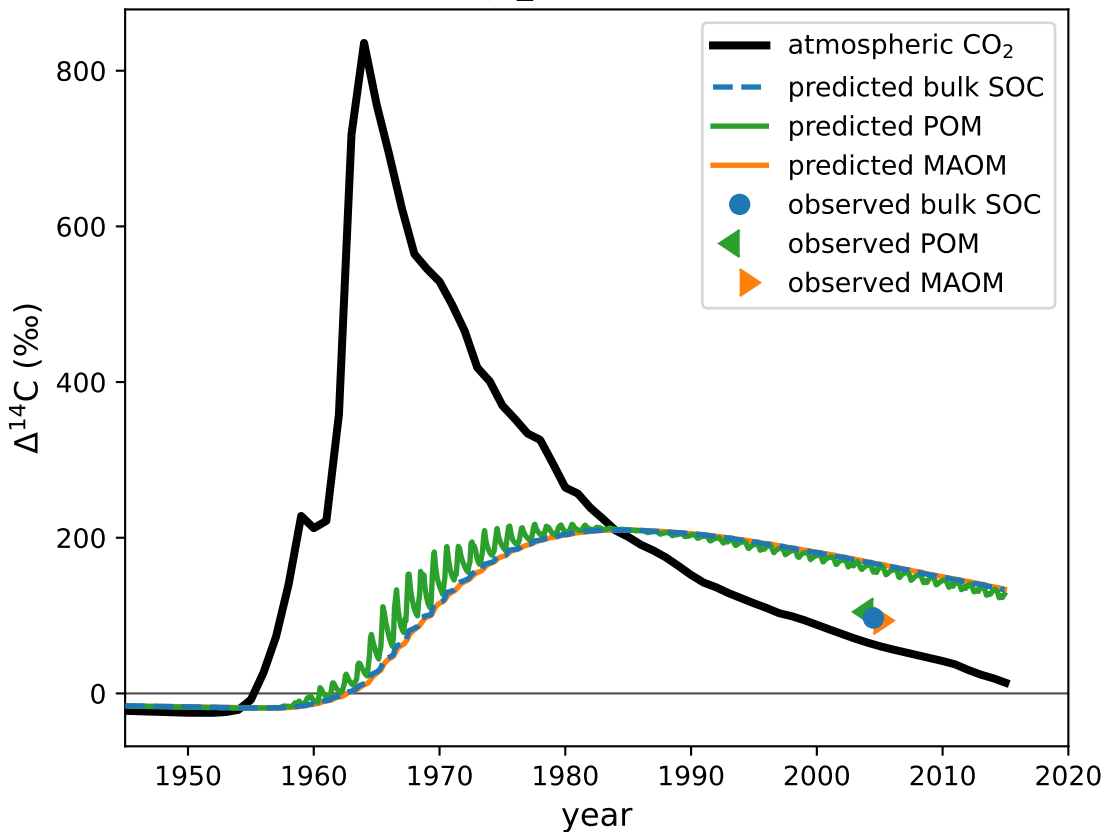

Supplement: Supplementary file 335 [file gmd-2023-242-supplement.zip]

MEND  
Schrumpf\_2013, Grignon, Grignon.1

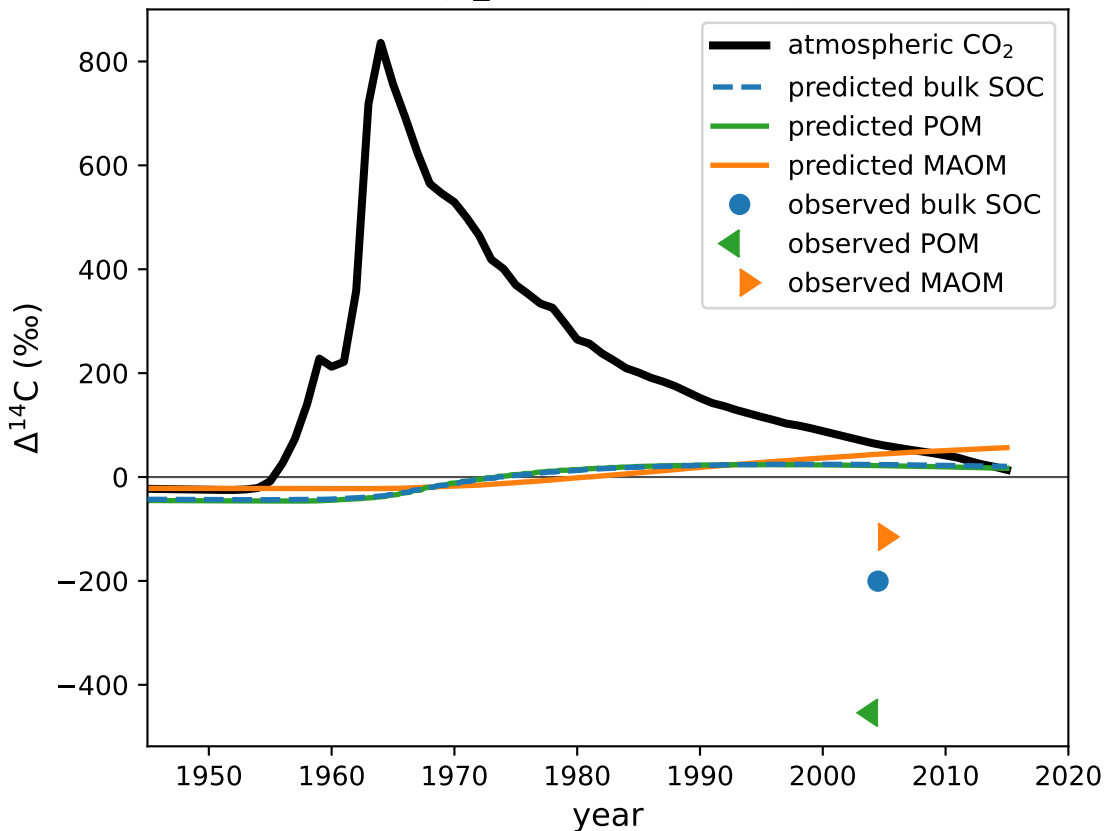

Supplement: Supplementary file 336 [file gmd-2023-242-supplement.zip]

SOMic  
McFarlane\_2013, MA Harvard Forest, H4

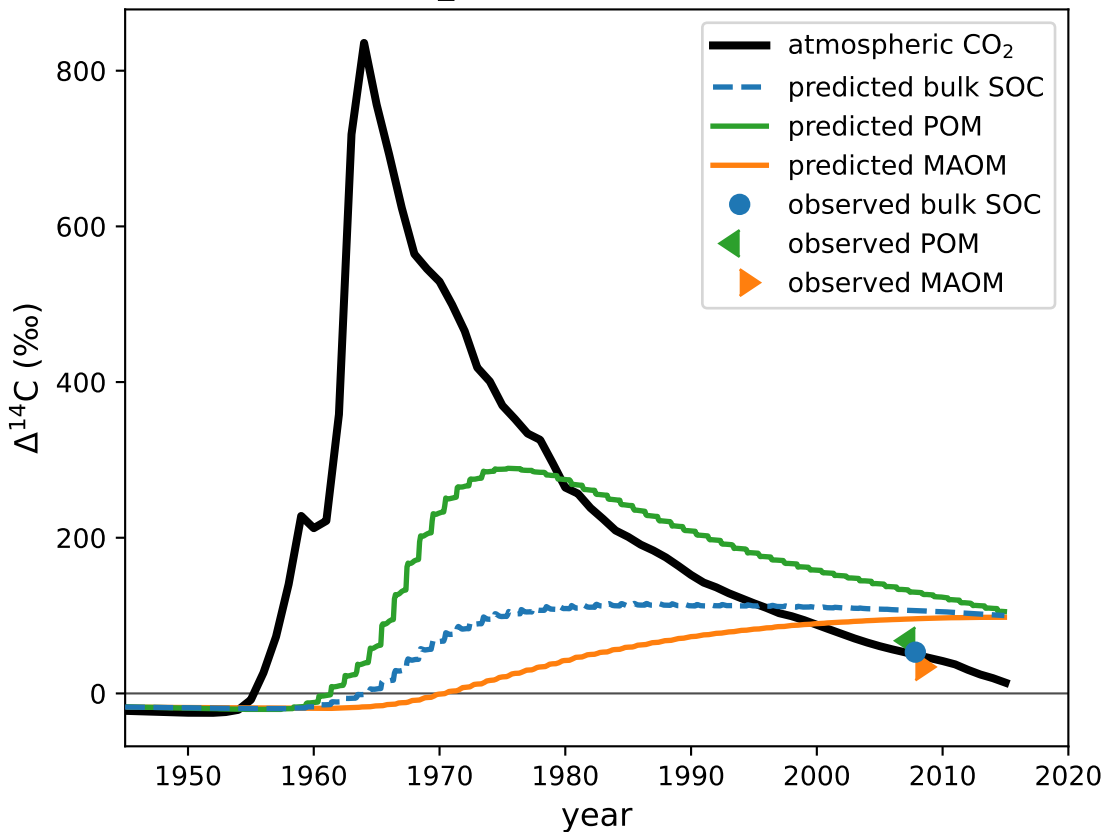

Supplement: Supplementary file 337 [file gmd-2023-242-supplement.zip]

Millennial  
Schrumpf\_2013, Bugac, Bugac.1

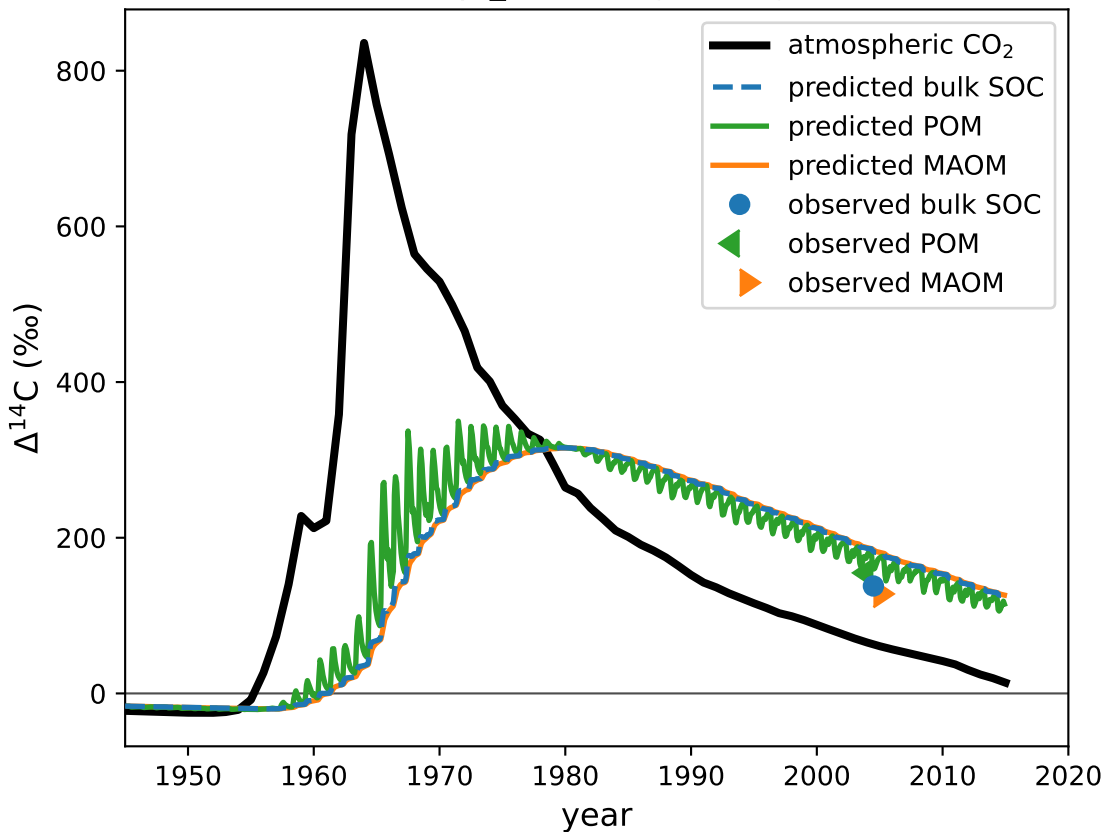

Supplement: Supplementary file 338 [file gmd-2023-242-supplement.zip]

Millennial  
McFarlane\_2013, MA Harvard Forest, H3

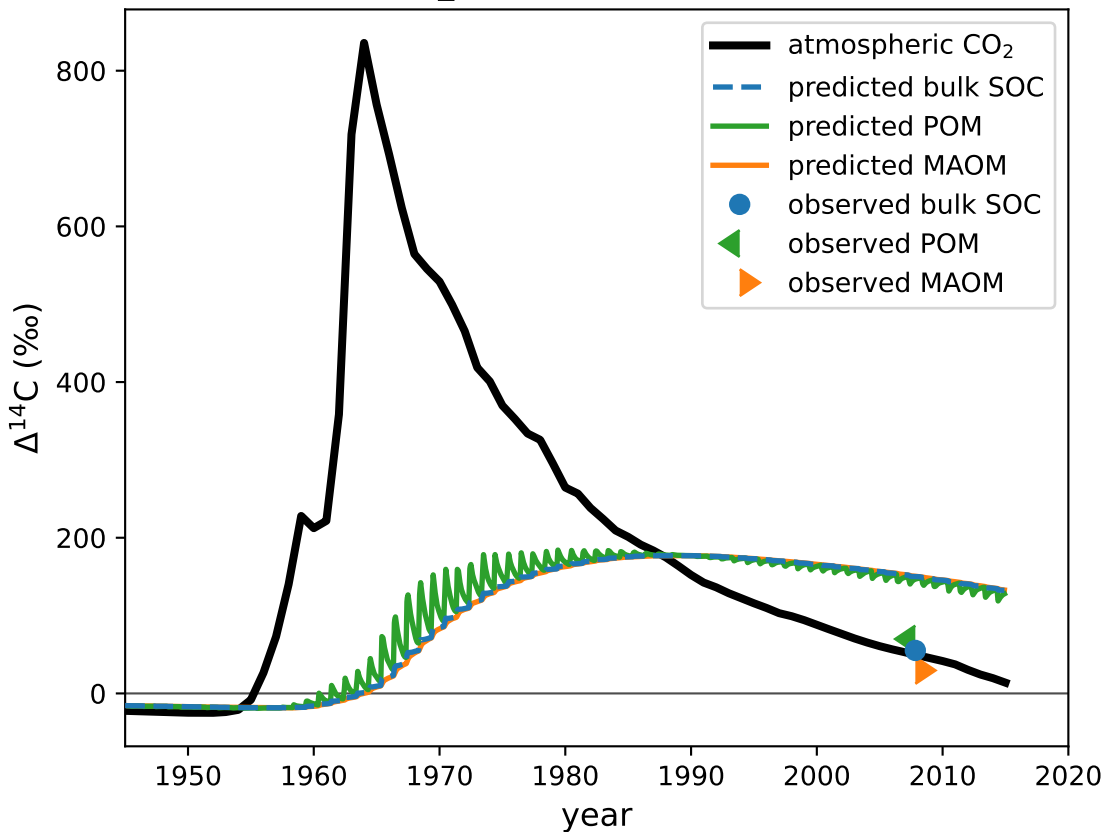

Supplement: Supplementary file 339 [file gmd-2023-242-supplement.zip]

CORPSE  
Lemke\_2006, Solling, Solling\_DO\_F2

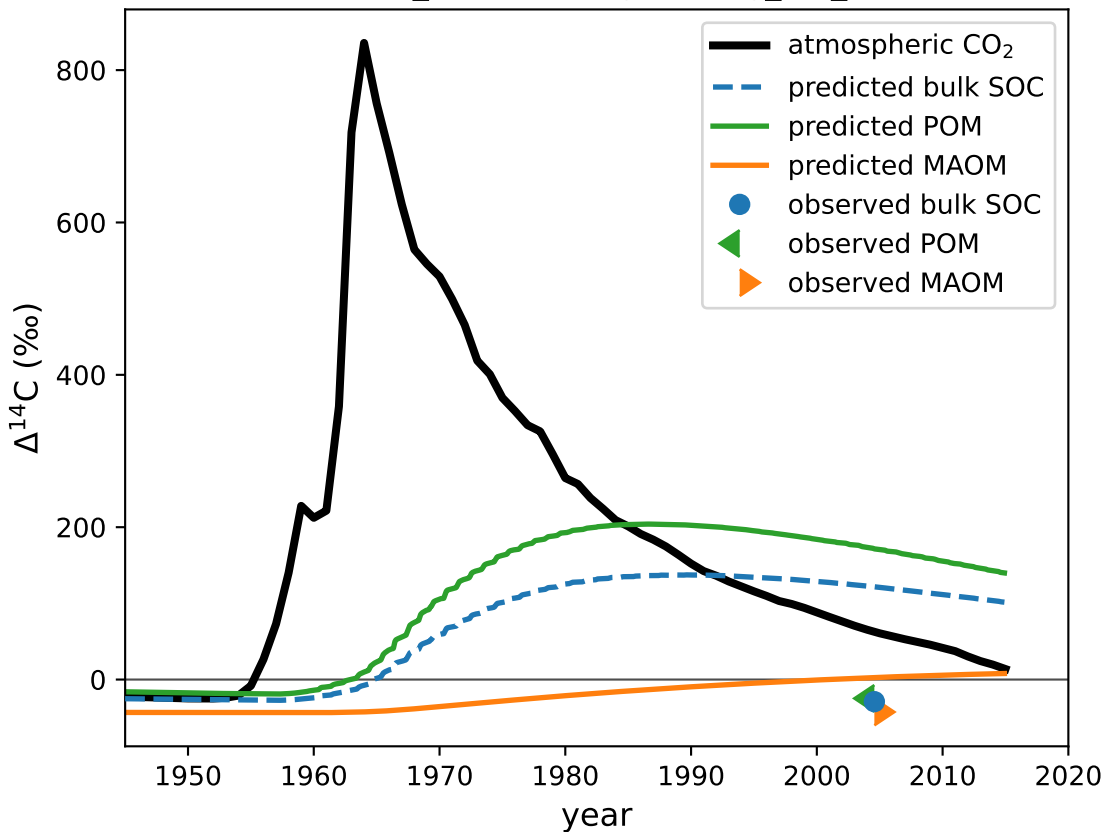

Supplement: Supplementary file 340 [file gmd-2023-242-supplement.zip]

SOMic  
Marin-Spiotta\_2008, Sierra de Cayey, 80yr secondary forest

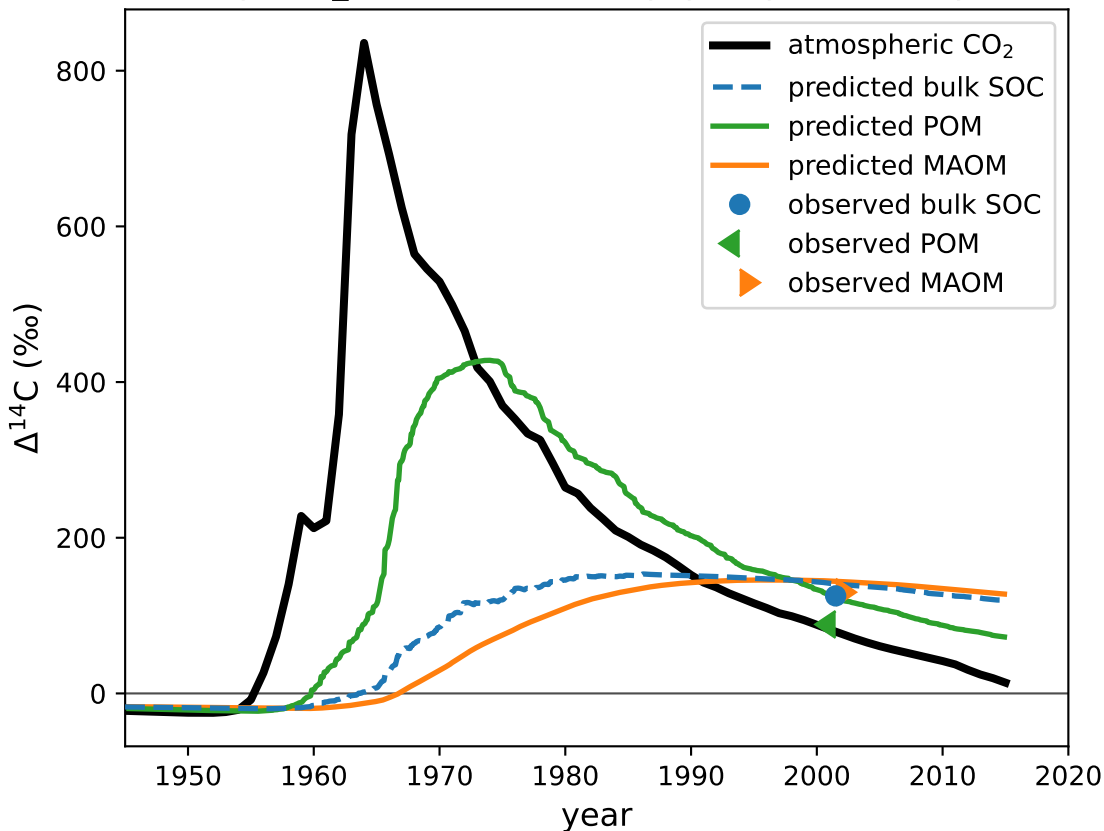

Supplement: Supplementary file 341 [file gmd-2023-242-supplement.zip]

# MEND

Lybrand\_2017, Catalina CZO ponderosa, ponderosa pine\_divergent

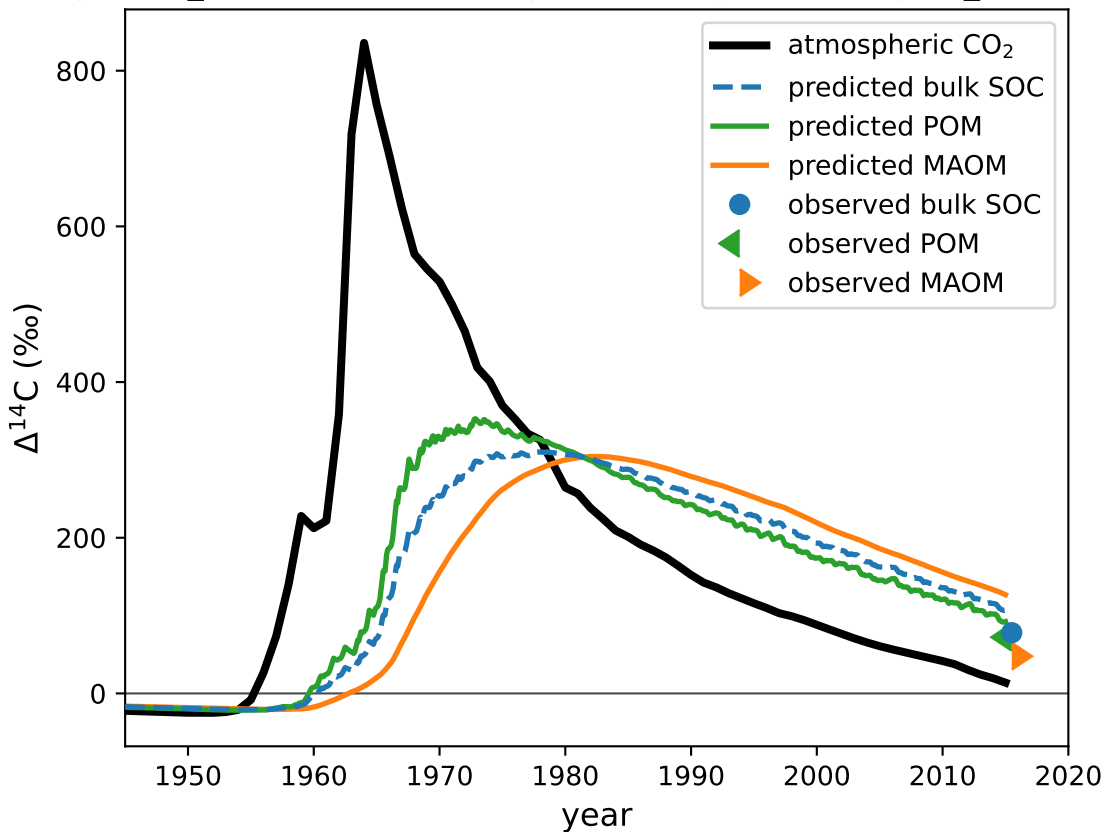

Supplement: Supplementary file 342 [file gmd-2023-242-supplement.zip]

MIMICS  
Schrumpf\_2013, Sorø, Sorø.1

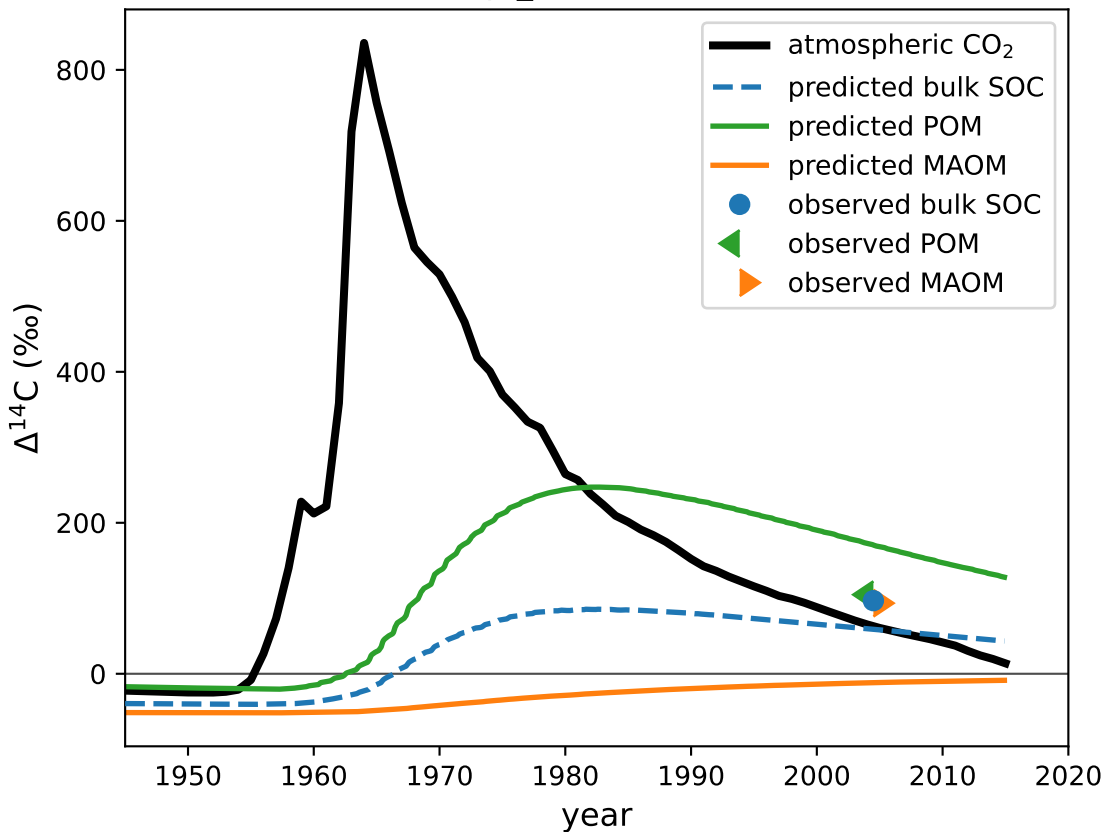

Supplement: Supplementary file 343 [file gmd-2023-242-supplement.zip]

CORPSE  
Rasmussen\_2018, ANwf, ANwf

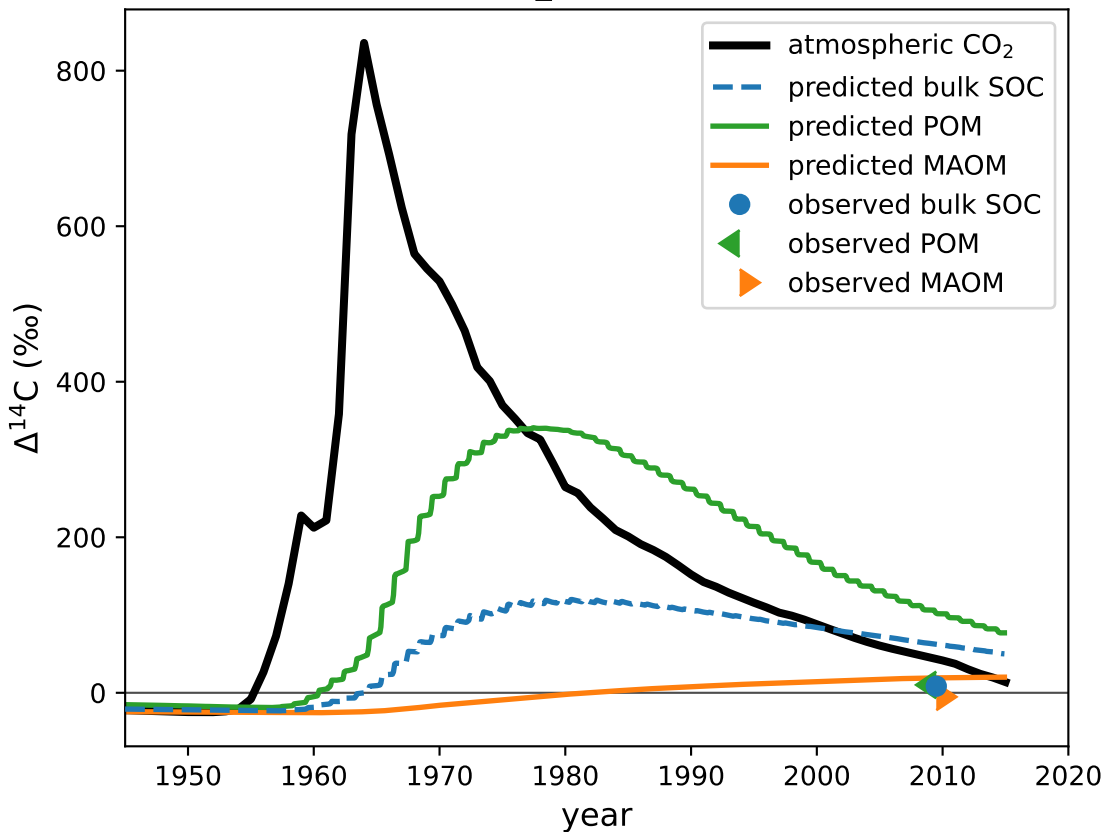

Supplement: Supplementary file 344 [file gmd-2023-242-supplement.zip]

SOMic  
McFarlane\_2013, NH Bartlett Forest, B5

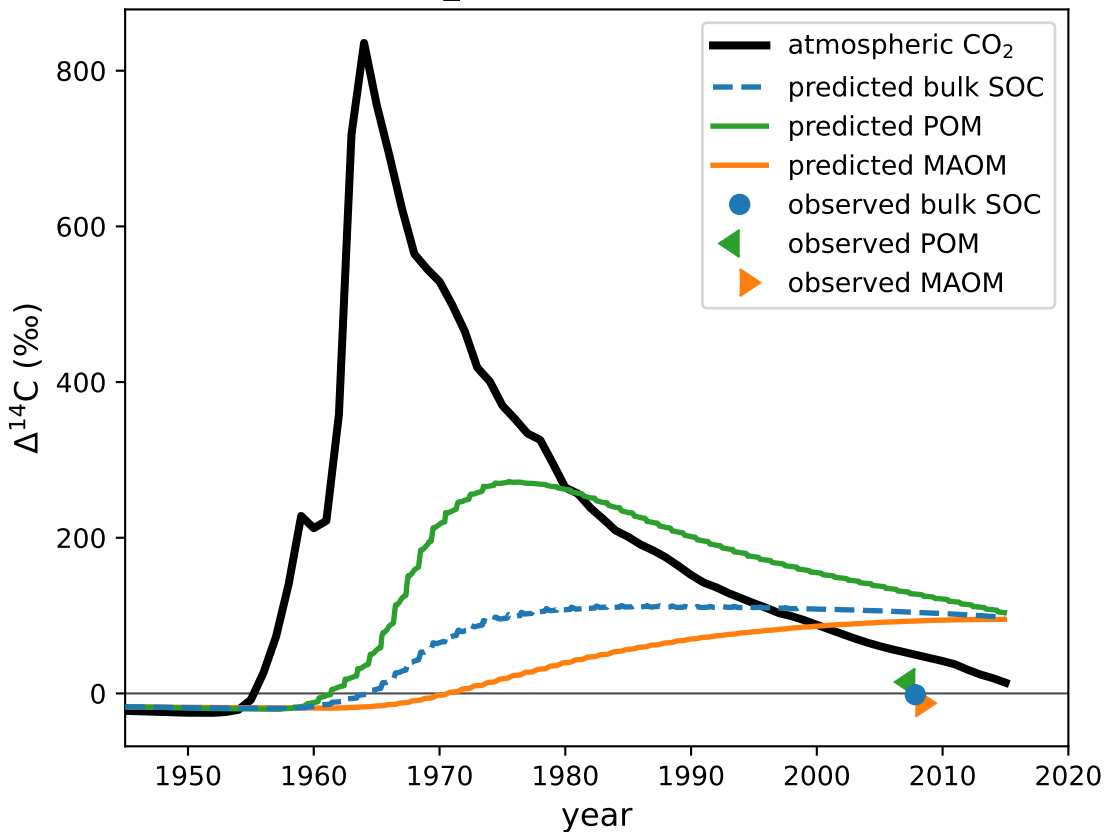

Supplement: Supplementary file 345 [file gmd-2023-242-supplement.zip]

Millennial  
Rasmussen\_2018, GRpp, GRpp

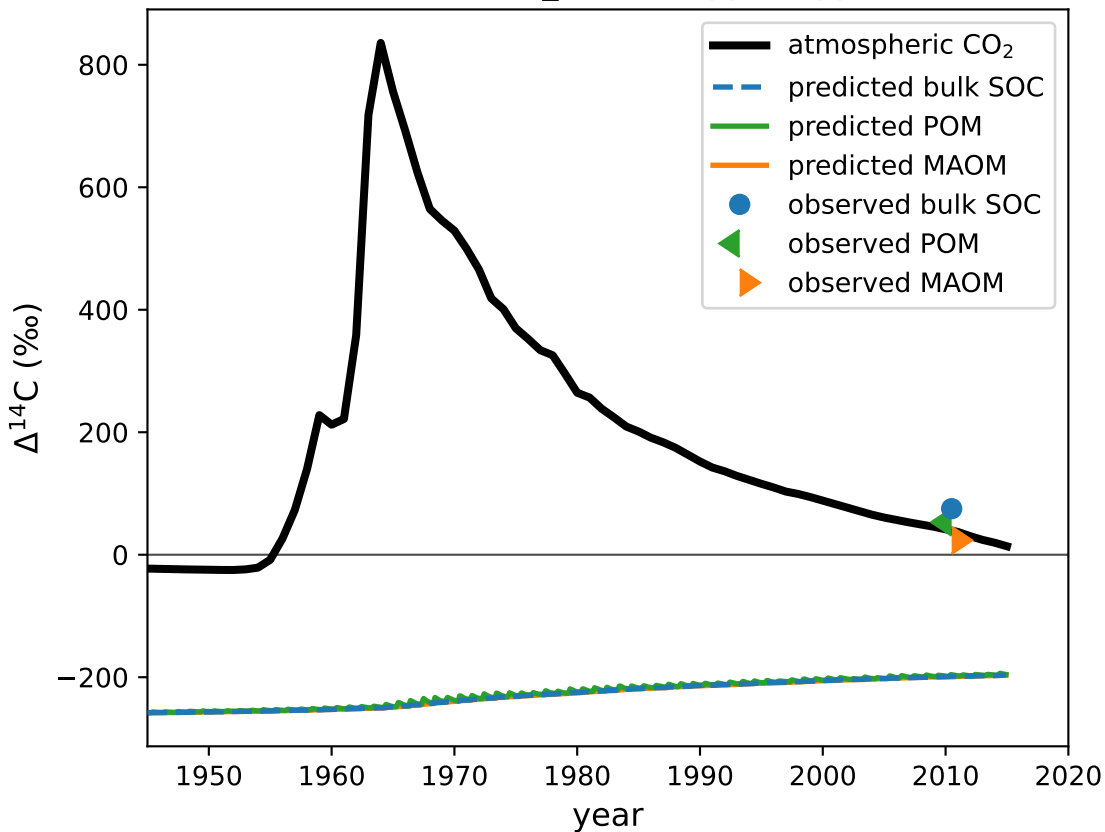

Supplement: Supplementary file 346 [file gmd-2023-242-supplement.zip]

CORPSE  
Schrumpf\_2013, Wetzstein, Wetzstein.1

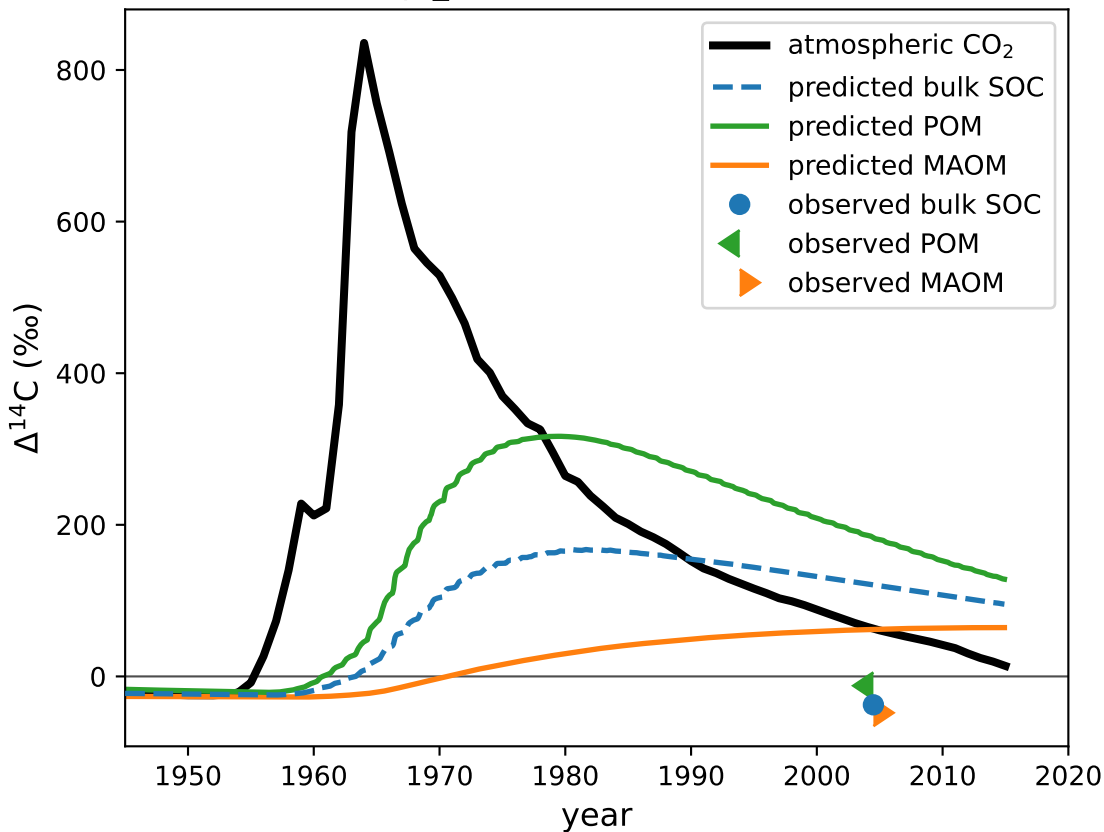

Supplement: Supplementary file 347 [file gmd-2023-242-supplement.zip]

SOMic  
Meyer\_2012, Matsch, Abandoned

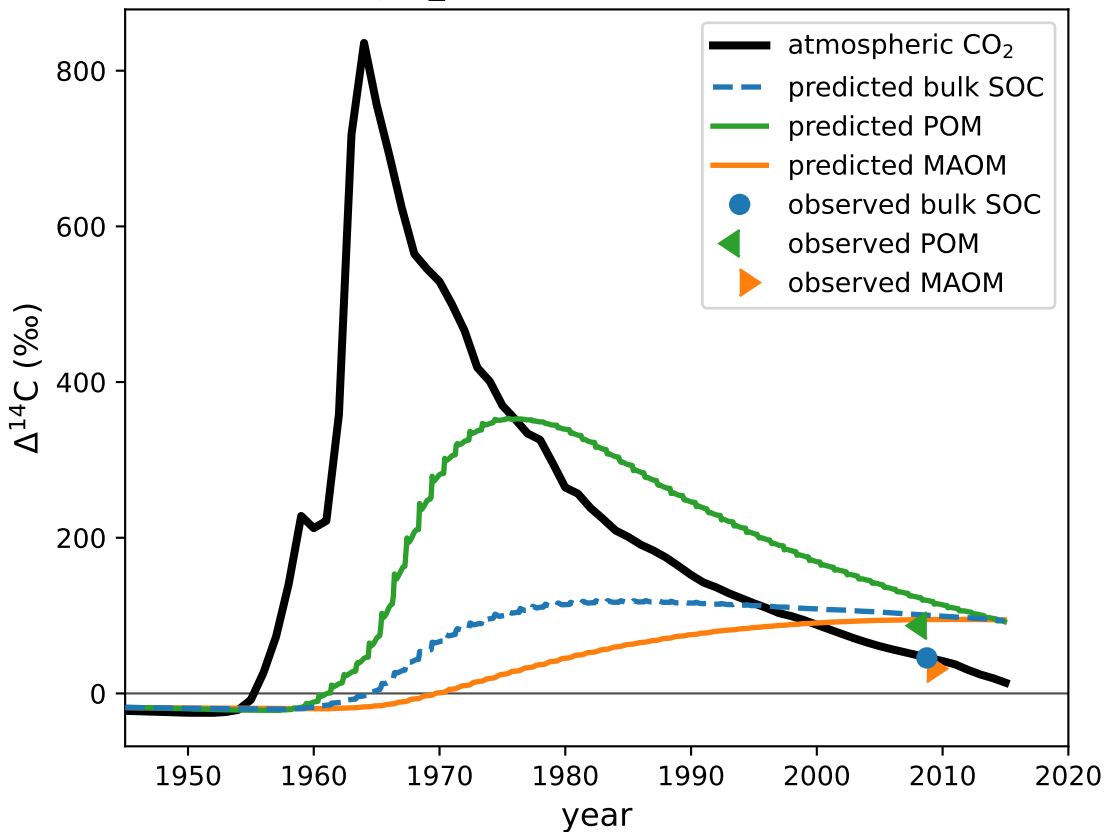

Supplement: Supplementary file 348 [file gmd-2023-242-supplement.zip]

Millennial  
McFarlane\_2013, MO Ozark BREA, M1

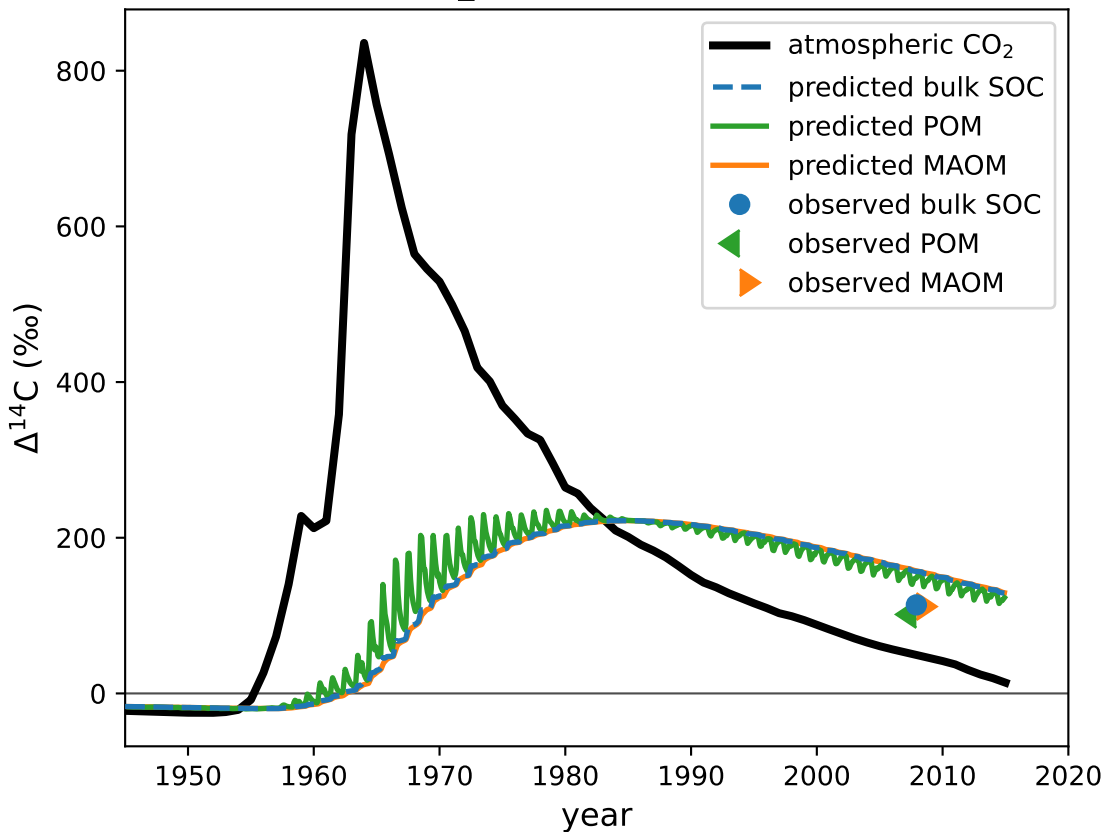

Supplement: Supplementary file 349 [file gmd-2023-242-supplement.zip]

# MEND

Lybrand\_2017, Catalina CZO ponderosa, ponderosa pine\_convergen

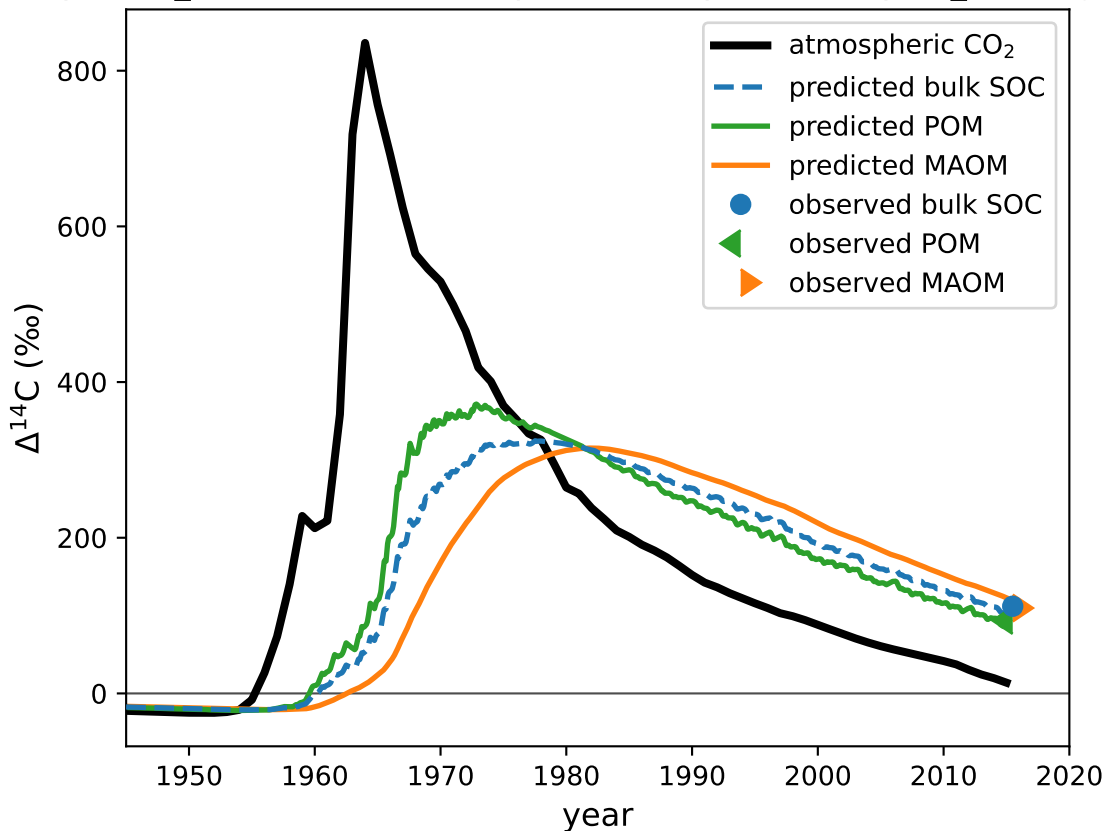

Supplement: Supplementary file 350 [file gmd-2023-242-supplement.zip]

CORPSE  
McFarlane\_2013, MI-Coarse UMBS, G3

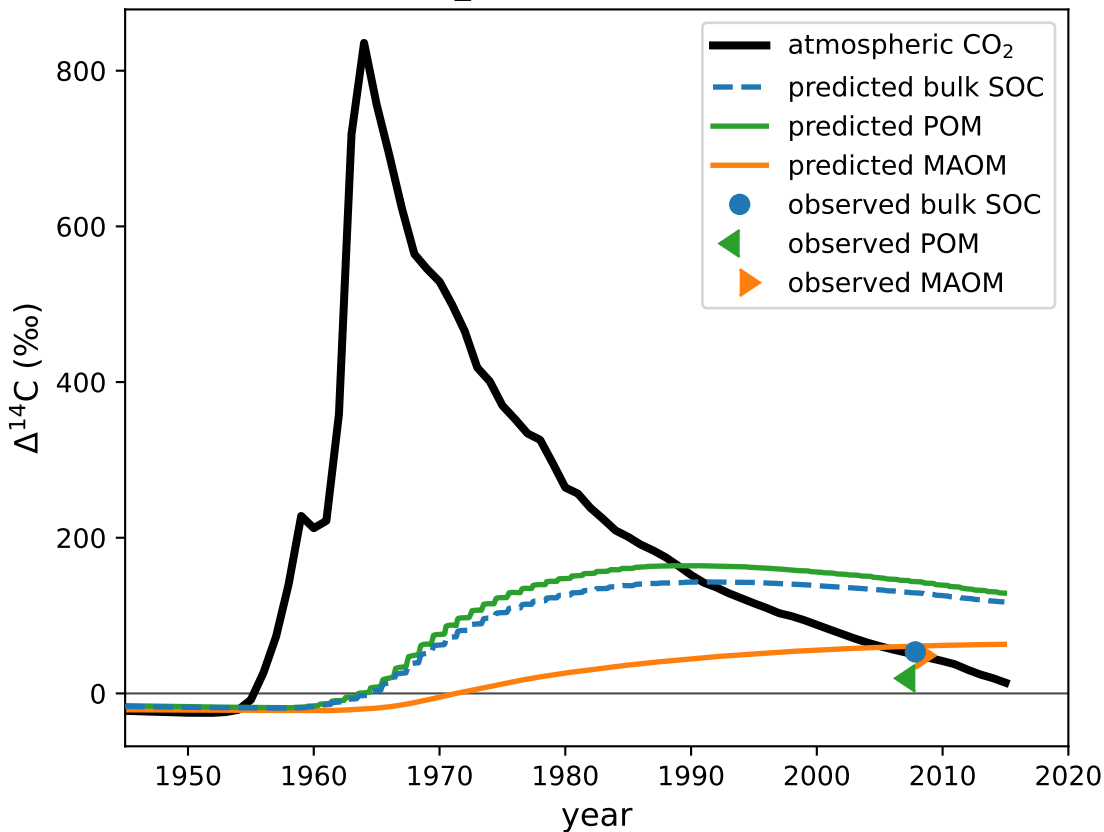

Supplement: Supplementary file 351 [file gmd-2023-242-supplement.zip]

MEND  
Rasmussen\_2018, BSrf, BSrf

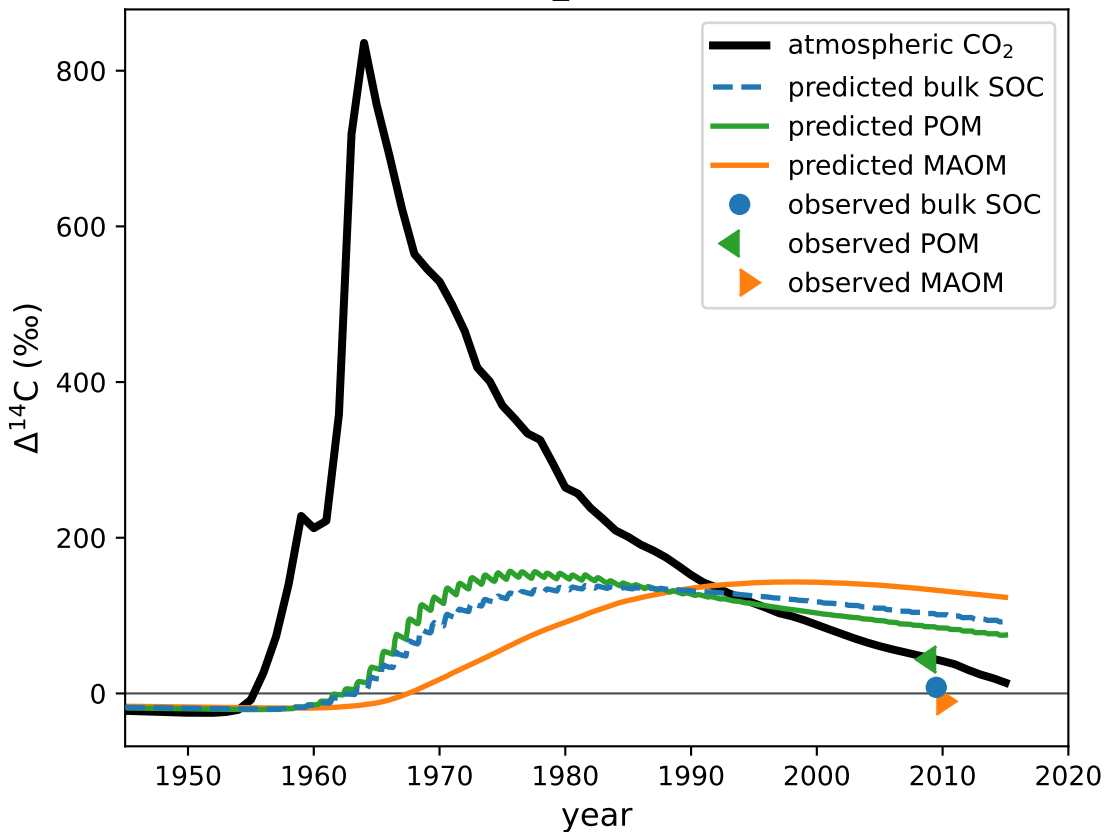

Supplement: Supplementary file 352 [file gmd-2023-242-supplement.zip]

## MEND

Lybrand\_2017, Catalina CZO conifer, mixed conifer\_divergent

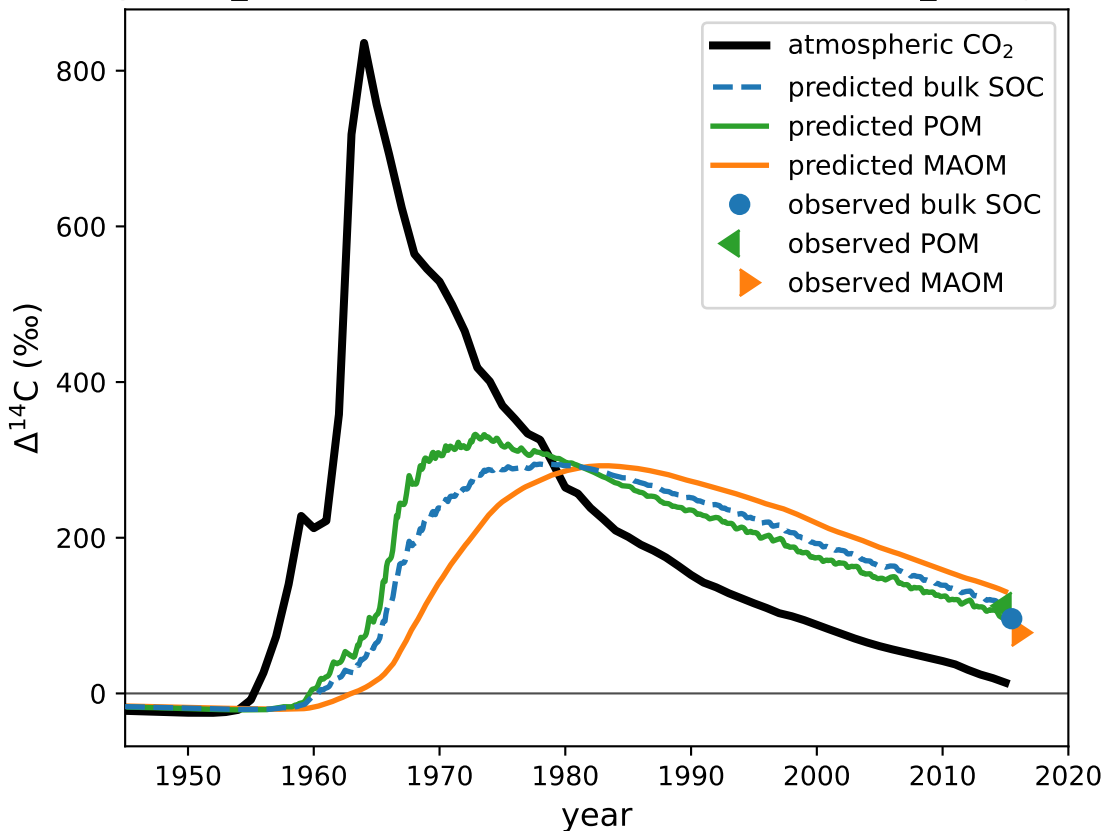

Supplement: Supplementary file 353 [file gmd-2023-242-supplement.zip]

CORPSE  
Heckman\_2018, AZ\_Mollisol, Basalt

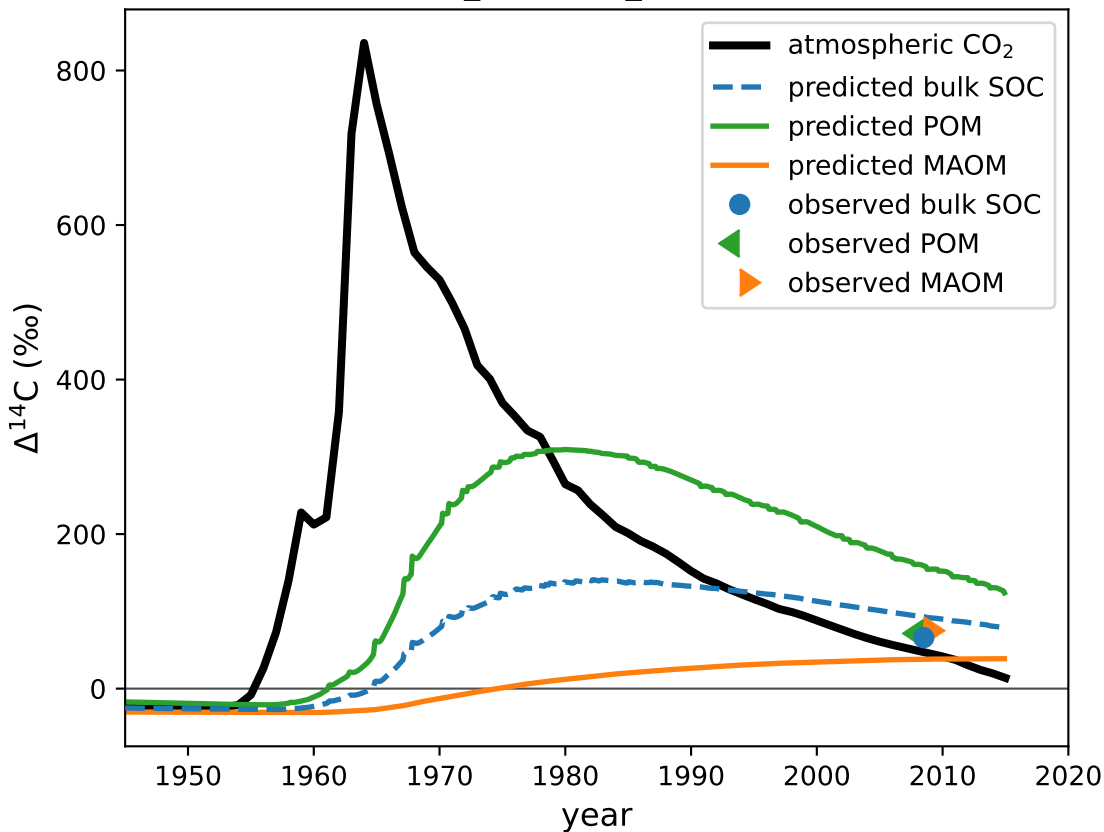

Supplement: Supplementary file 354 [file gmd-2023-242-supplement.zip]

Millennial  
Rasmussen\_2018, ANwf, ANwf

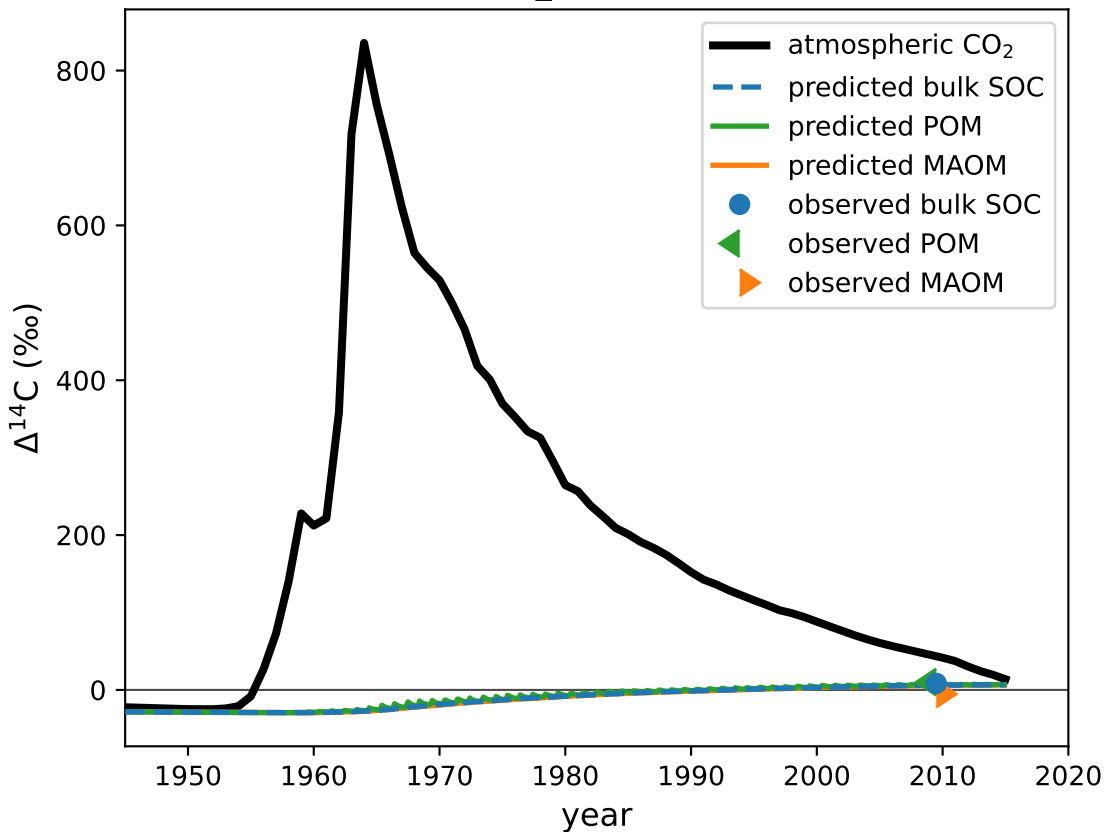

Supplement: Supplementary file 355 [file gmd-2023-242-supplement.zip]

MEND  
McFarlane\_2013, MA Harvard Forest, H1

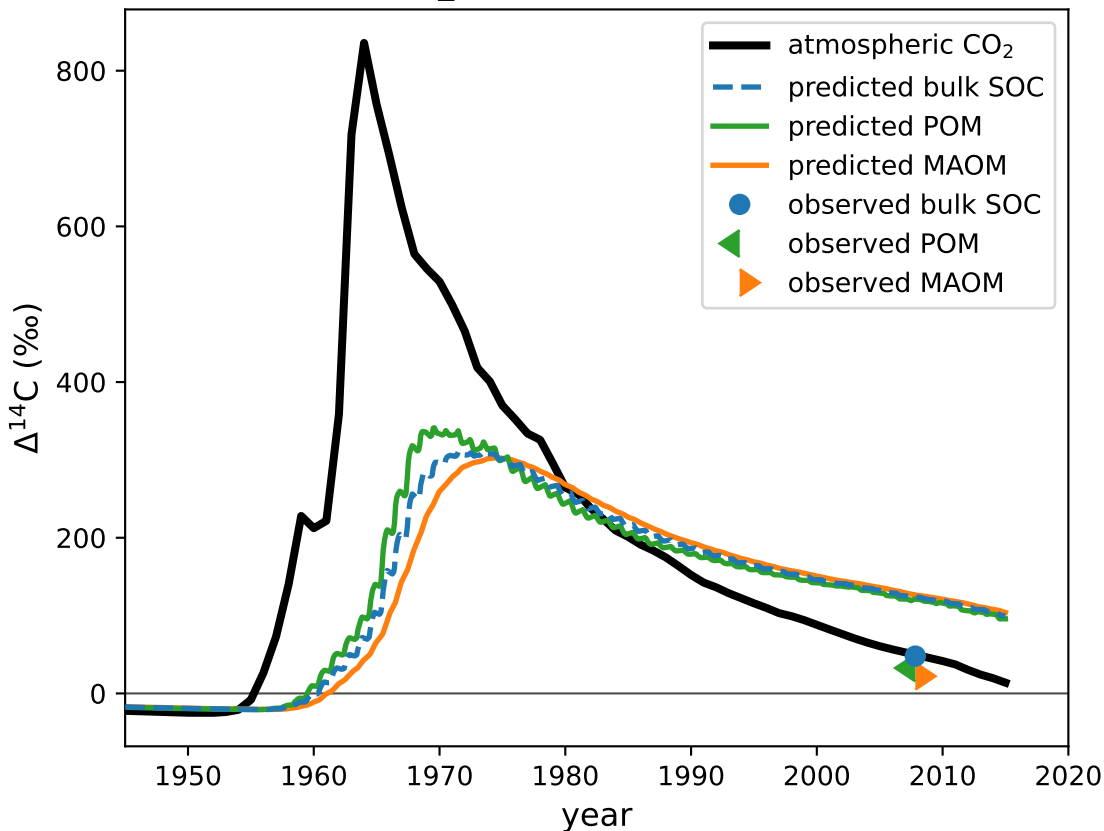

Supplement: Supplementary file 356 [file gmd-2023-242-supplement.zip]

SOMic  
Rasmussen\_2018, GRwf, GRwf

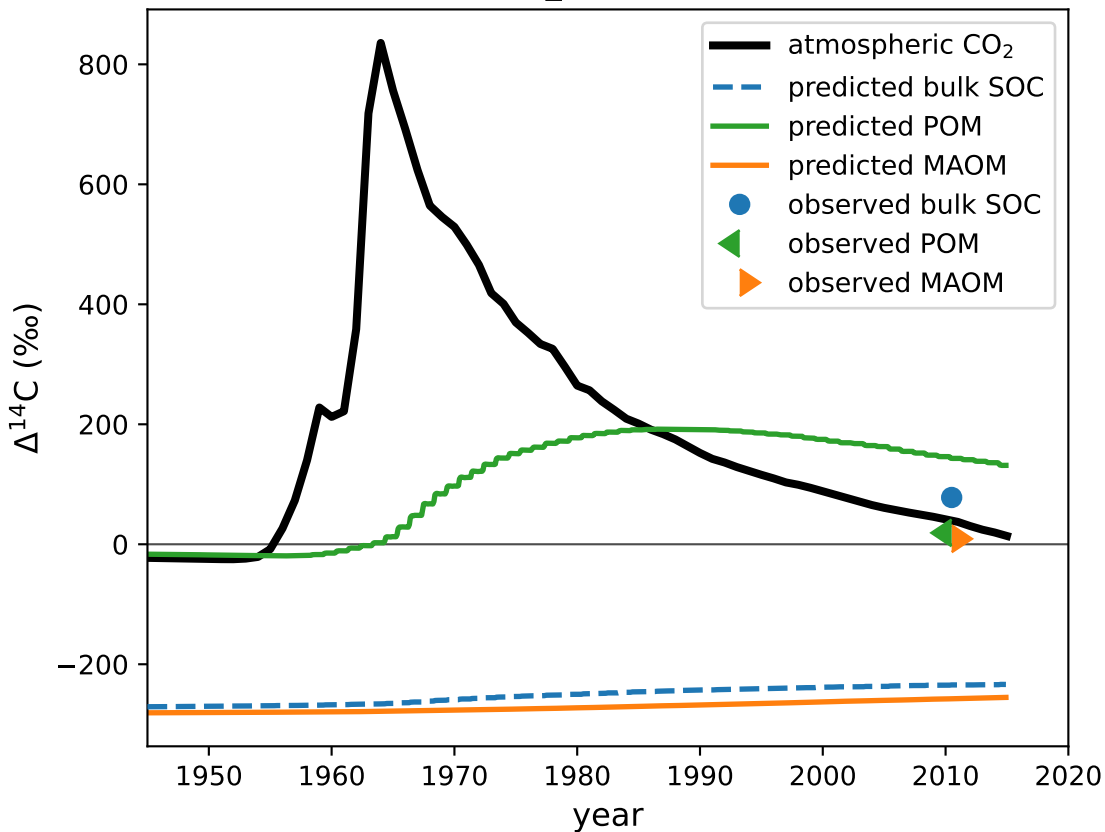

Supplement: Supplementary file 357 [file gmd-2023-242-supplement.zip]

MIMICS  
McFarlane\_2013, NH Bartlett Forest, B5

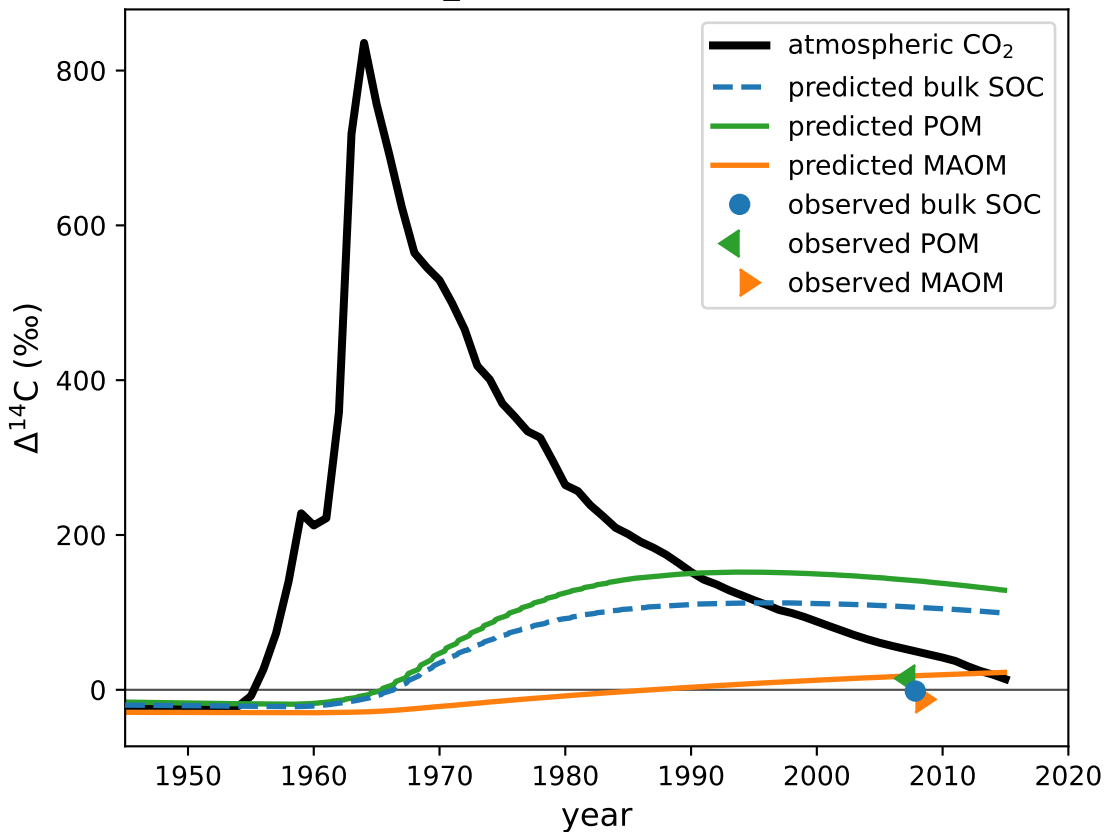

Supplement: Supplementary file 358 [file gmd-2023-242-supplement.zip]

MEND  
Meyer\_2012, Matsch, Meadow

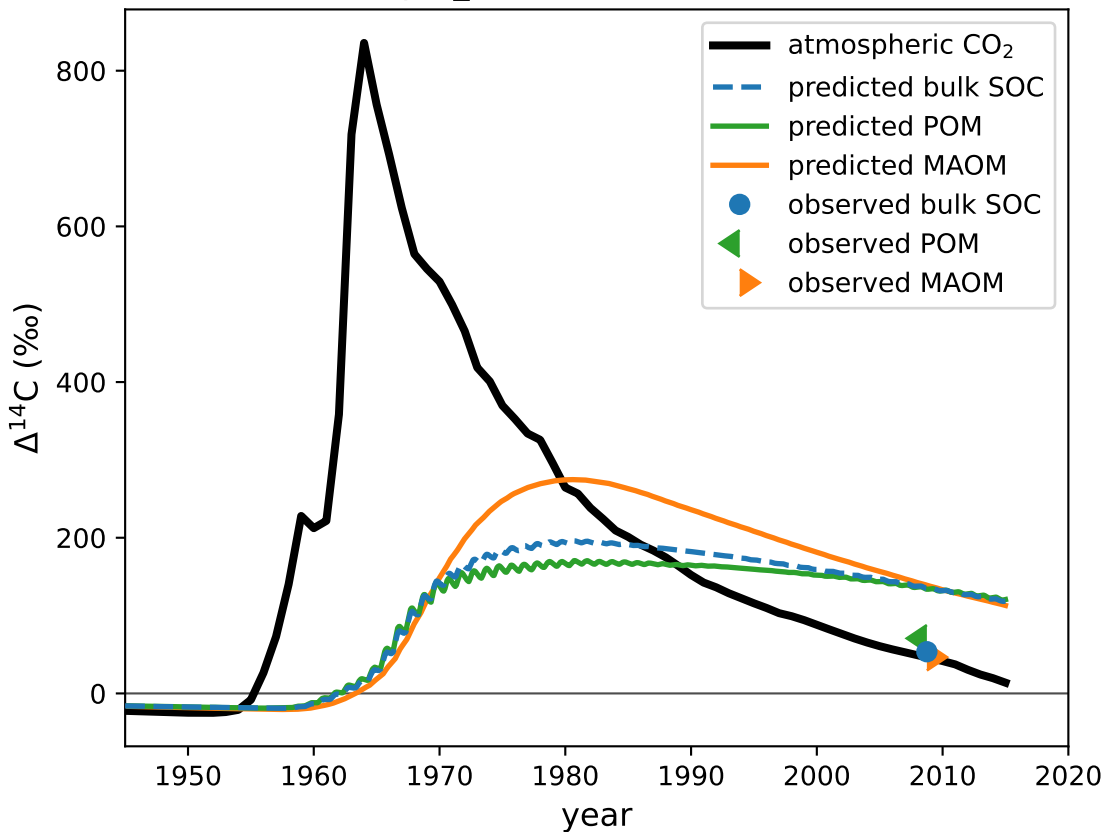

Supplement: Supplementary file 359 [file gmd-2023-242-supplement.zip]

MIMICS  
McFarlane\_2013, MO Ozark BREA, M2

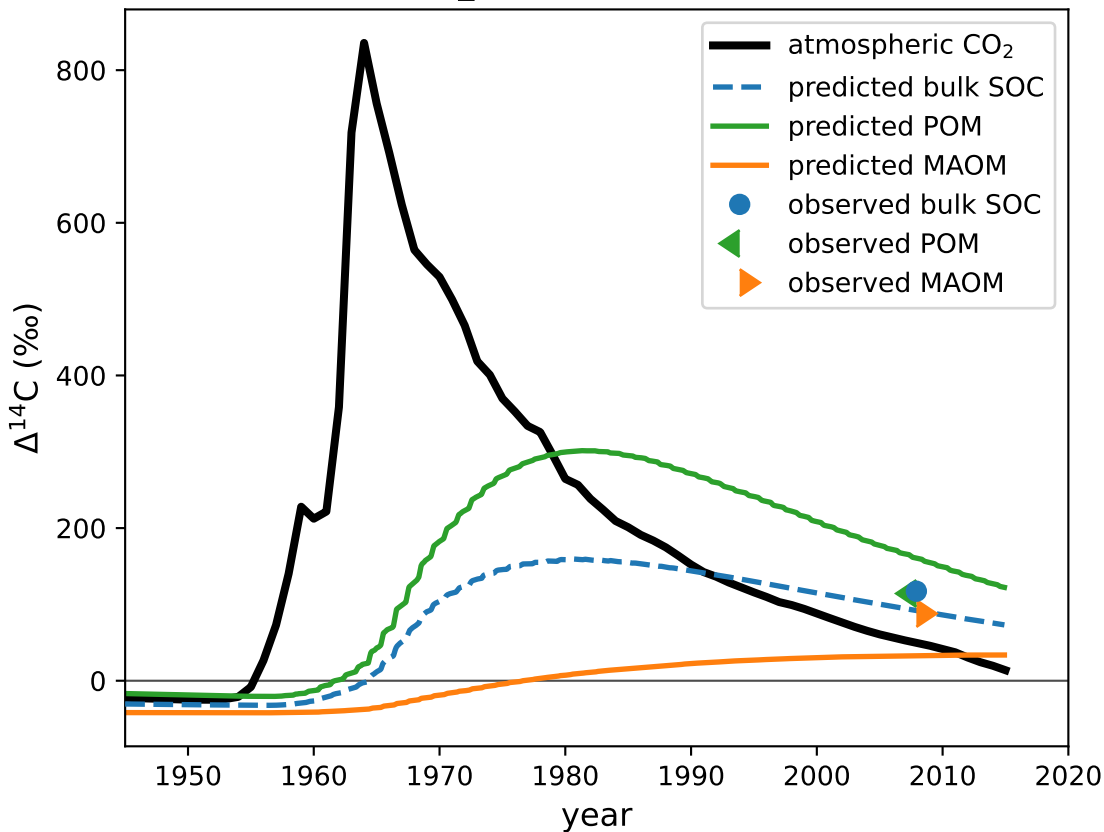

Supplement: Supplementary file 360 [file gmd-2023-242-supplement.zip]

MIMICS  
Harden\_2002, Dinesen, DPPR2

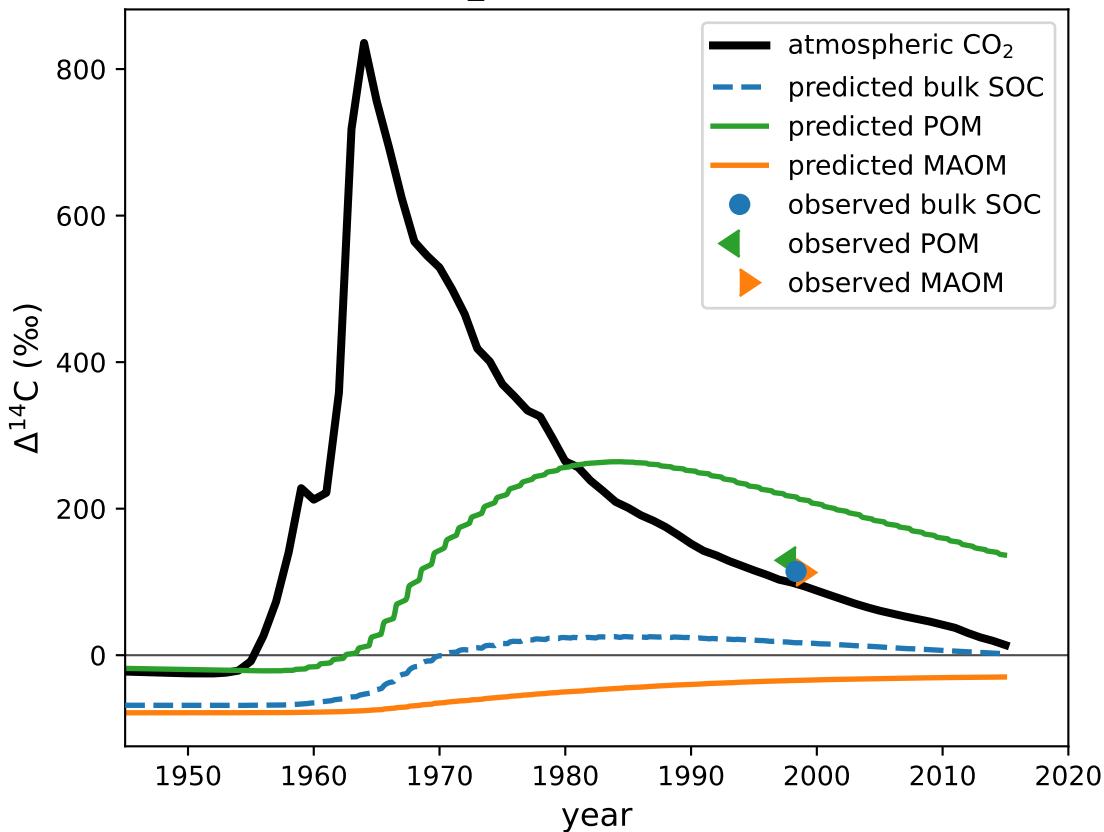

Supplement: Supplementary file 361 [file gmd-2023-242-supplement.zip]

MIMICS  
Lemke\_2006, Solling, Solling\_DO\_F2

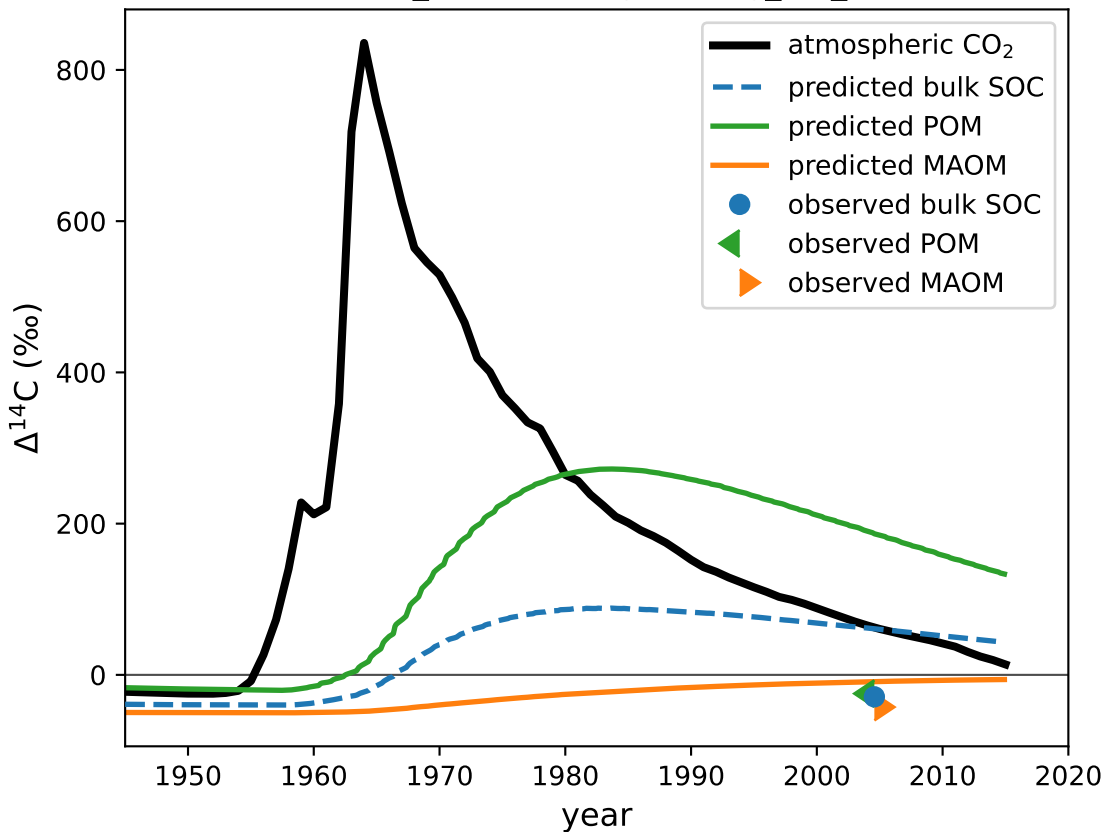

Supplement: Supplementary file 362 [file gmd-2023-242-supplement.zip]

Millennial  
Schrumpf\_2013, Gebesee, Gebesee.1

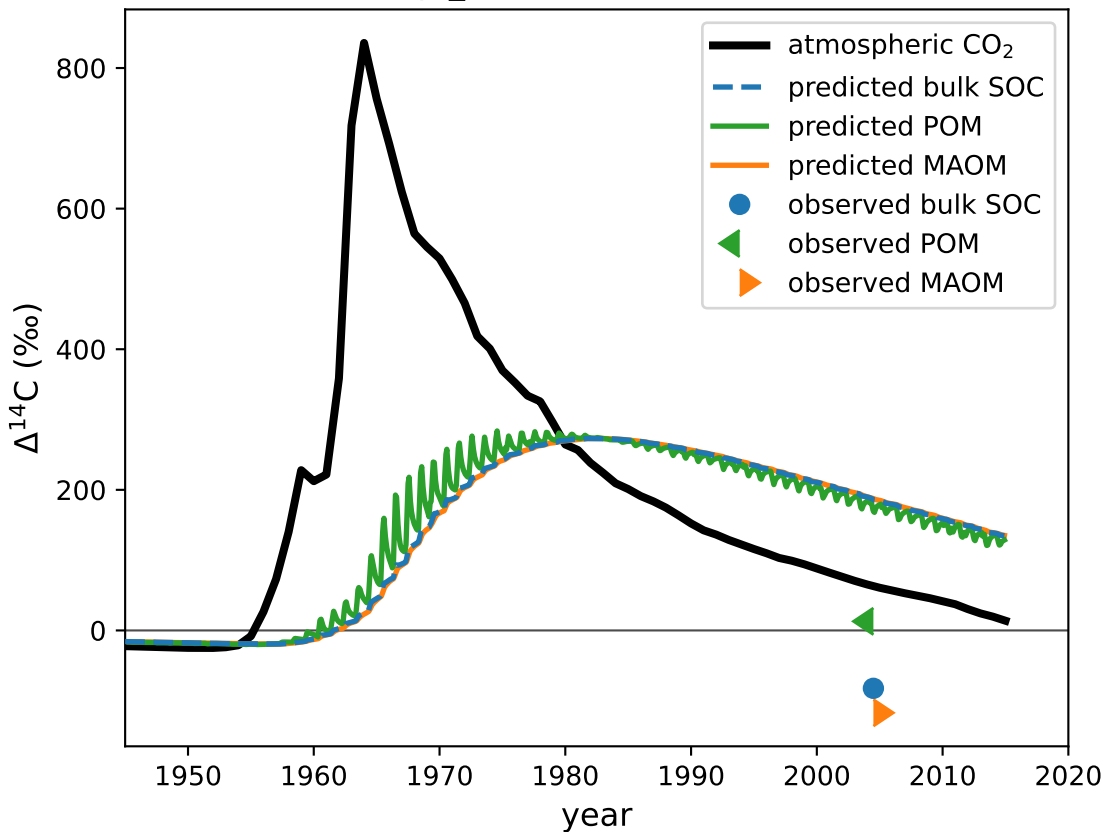

Supplement: Supplementary file 363 [file gmd-2023-242-supplement.zip]

Millennial  
McFarlane\_2013, NH Bartlett Forest, B5

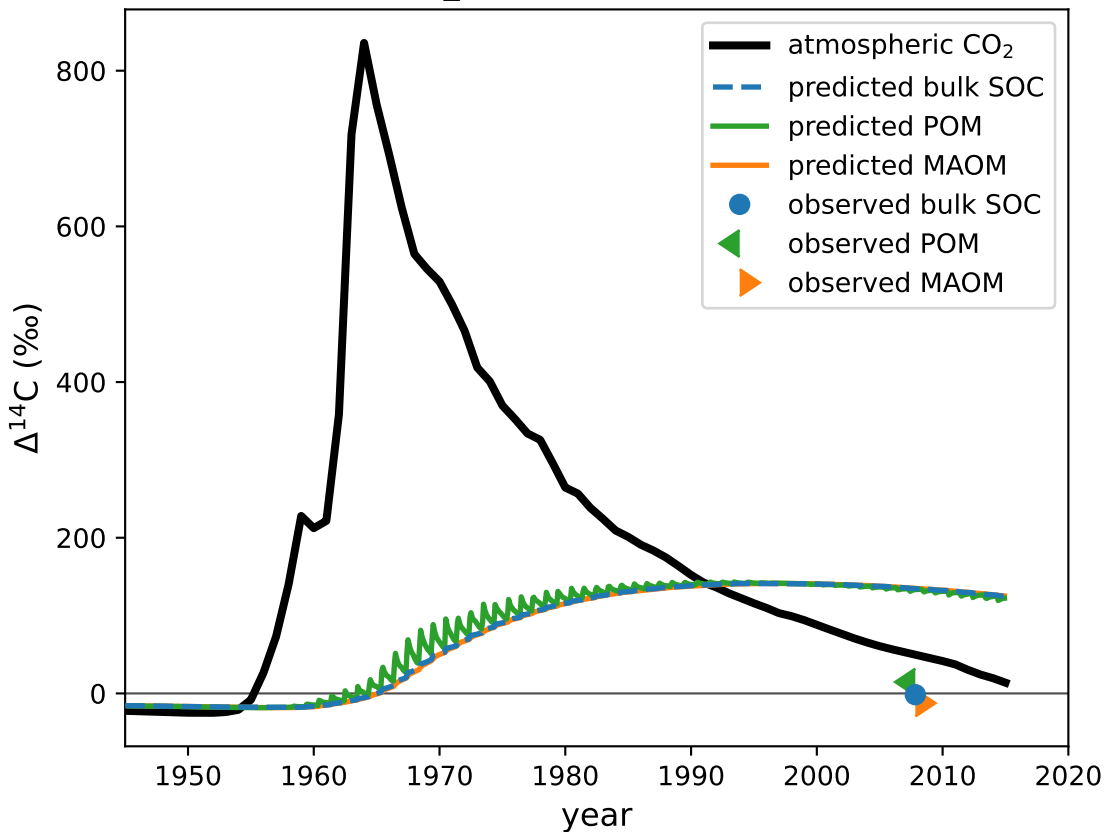

Supplement: Supplementary file 364 [file gmd-2023-242-supplement.zip]

Millennial  
McFarlane\_2013, MO Ozark BREA, M2

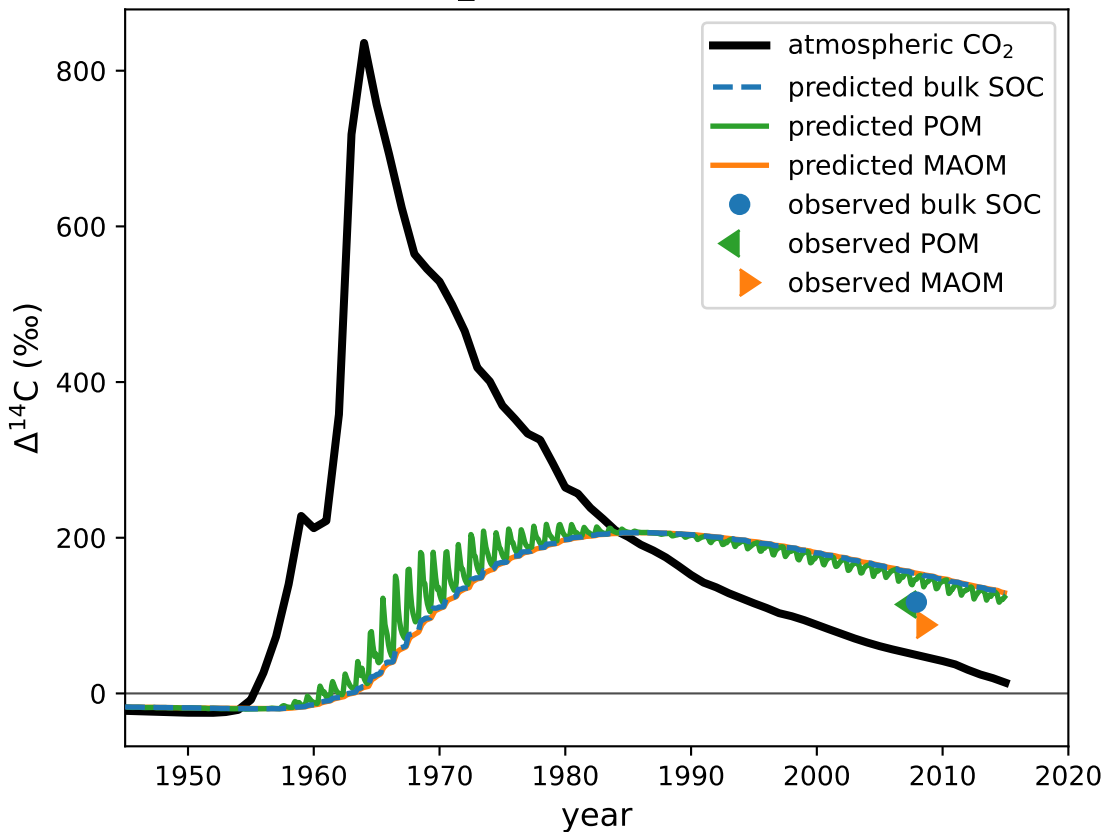

Supplement: Supplementary file 365 [file gmd-2023-242-supplement.zip]

MEND  
Meyer\_2012, Matsch, Pasture

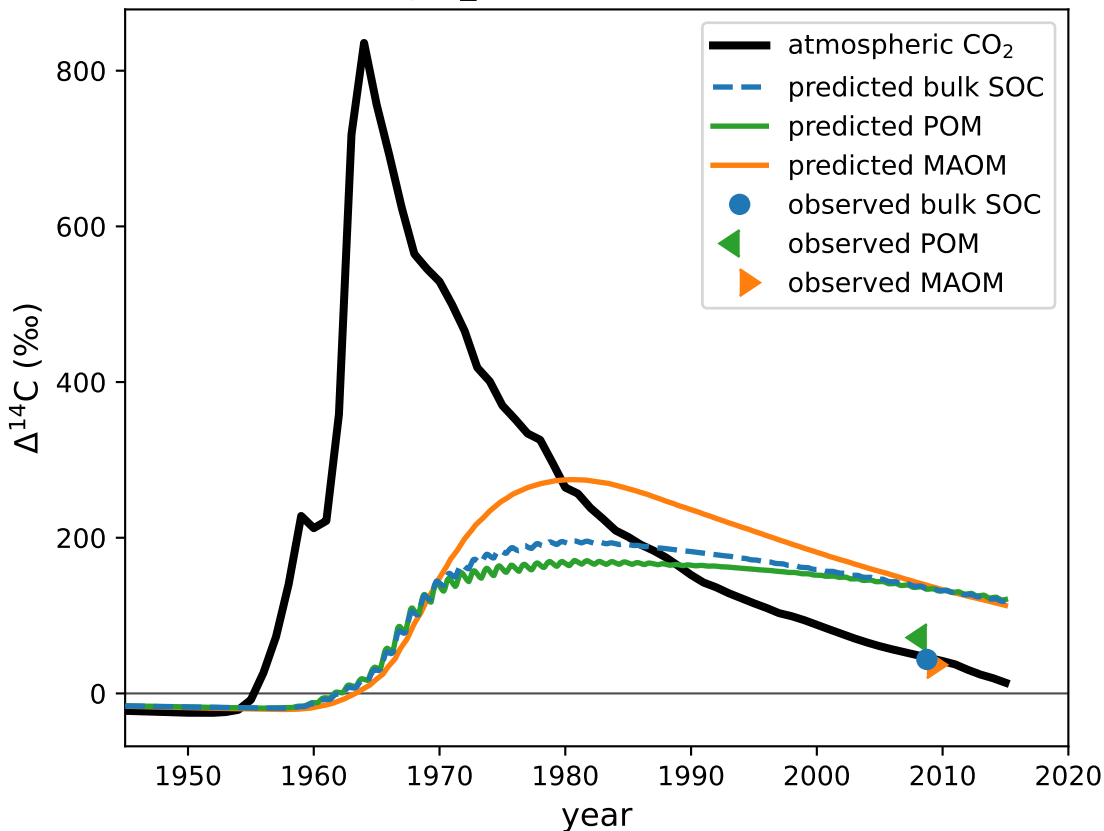

Supplement: Supplementary file 366 [file gmd-2023-242-supplement.zip]

CORPSE  
Rasmussen\_2018, ANpp, ANpp

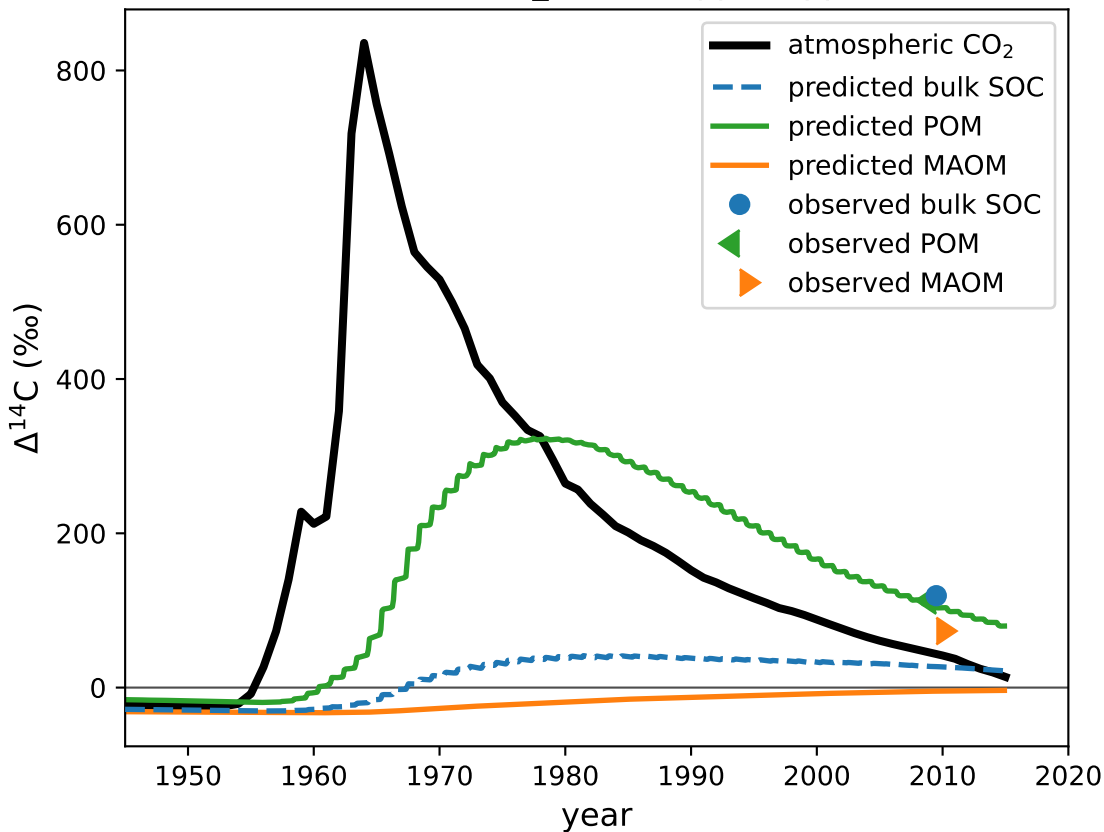

Supplement: Supplementary file 367 [file gmd-2023-242-supplement.zip]

MIMICS  
Rasmussen\_2018, ANwf, ANwf

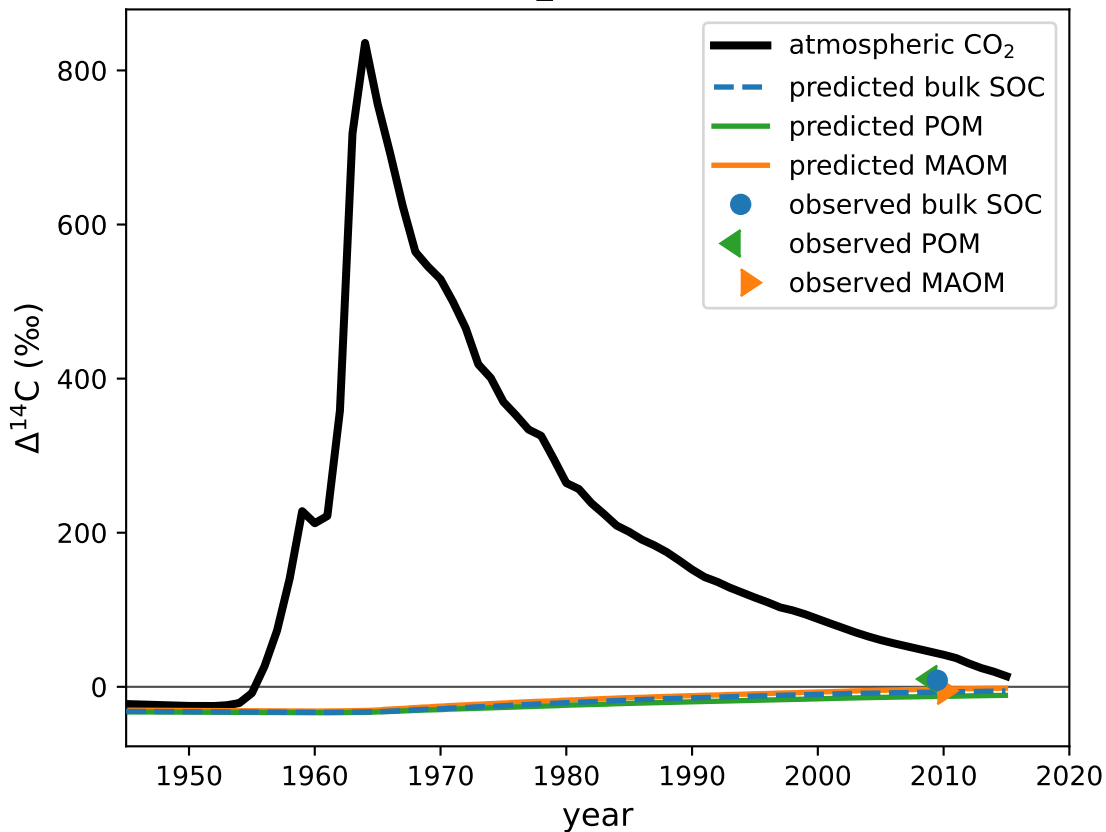

Supplement: Supplementary file 368 [file gmd-2023-242-supplement.zip]

MEND  
McFarlane\_2013, MO Ozark BREA, M2

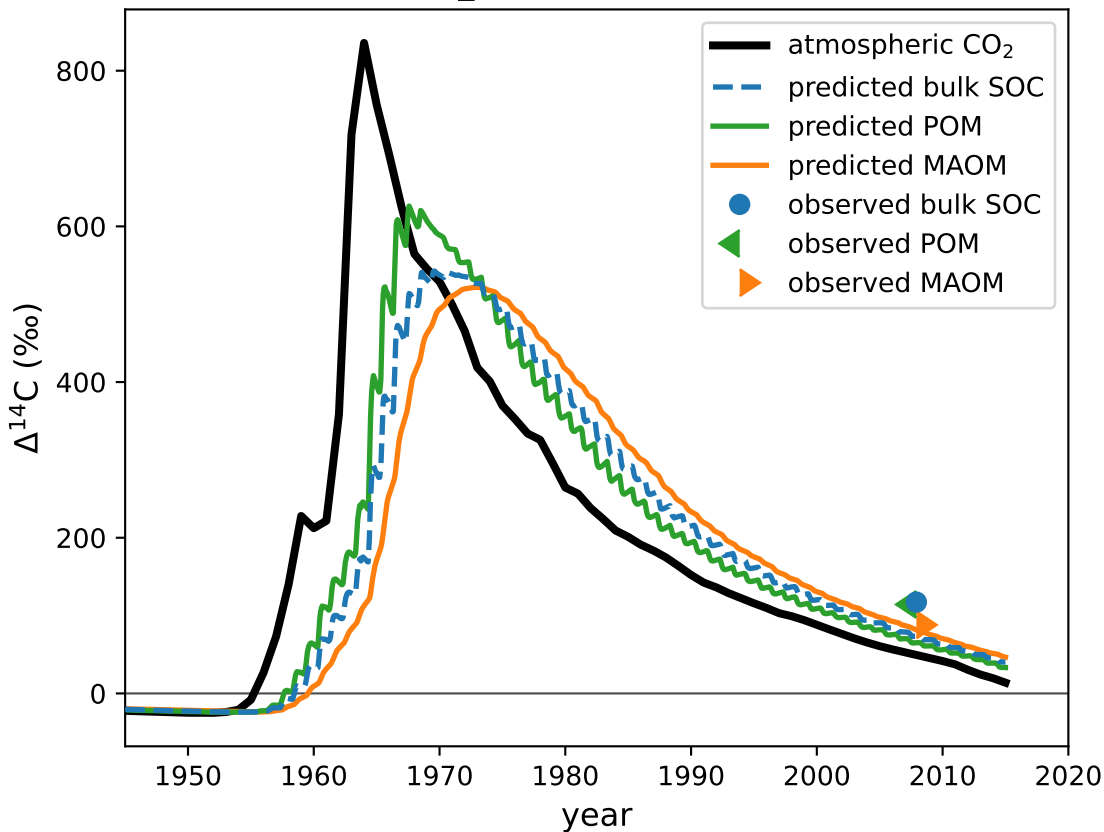

Supplement: Supplementary file 369 [file gmd-2023-242-supplement.zip]

Millennial  
Schrumpf\_2013, Wetzstein, Wetzstein.1

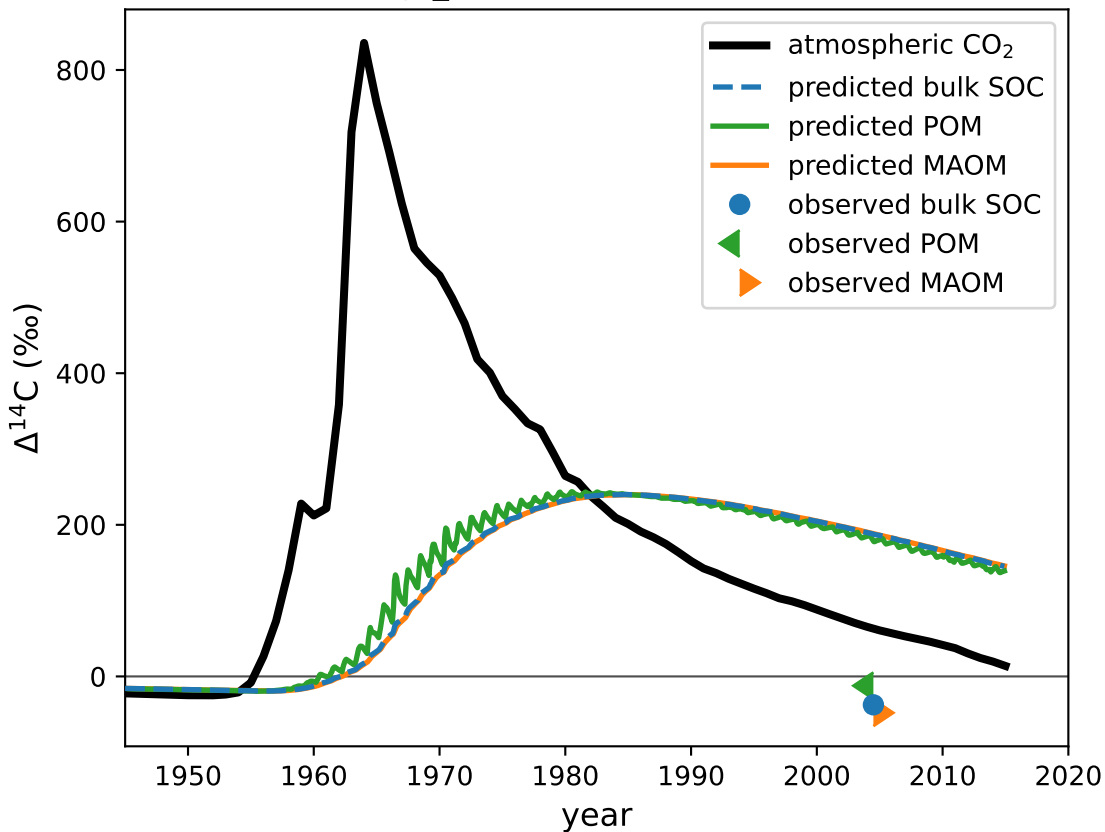

Supplement: Supplementary file 370 [file gmd-2023-242-supplement.zip]

Millennial  
Berhe\_2012, Tennessee Valley, hollow comp

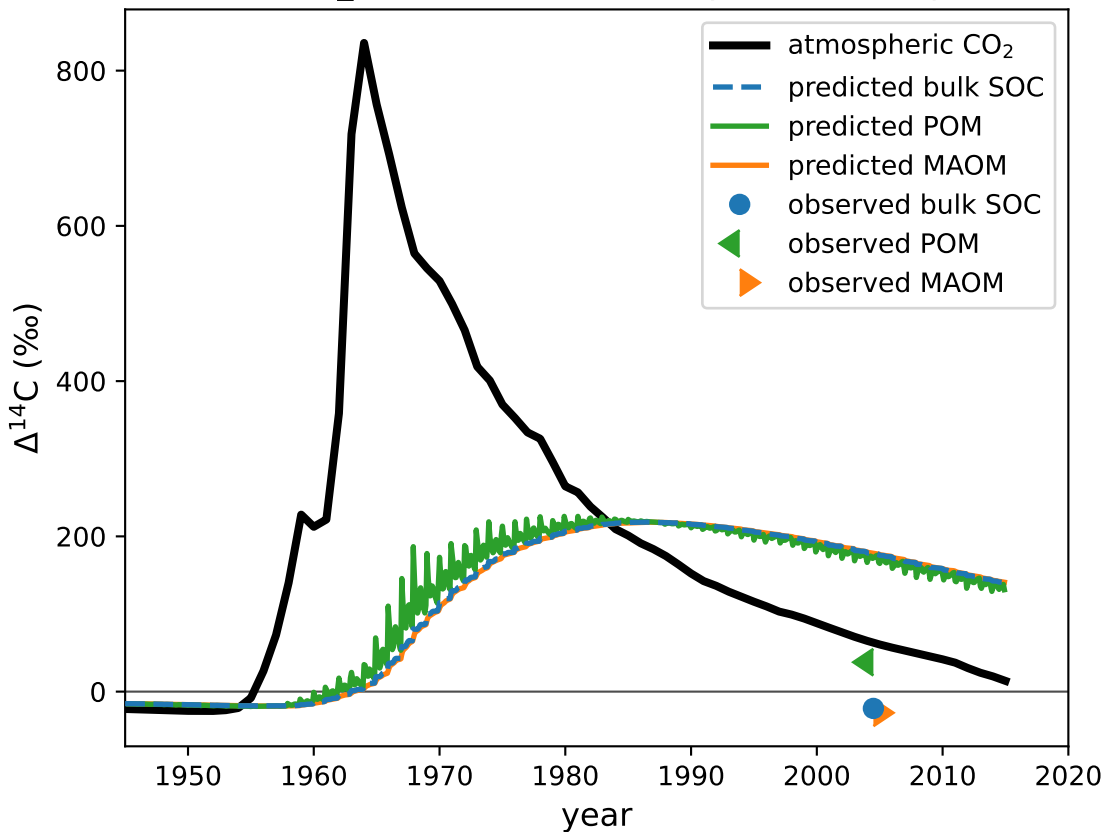

Supplement: Supplementary file 371 [file gmd-2023-242-supplement.zip]

MIMICS  
McFarlane\_2013, NH Bartlett Forest, B2

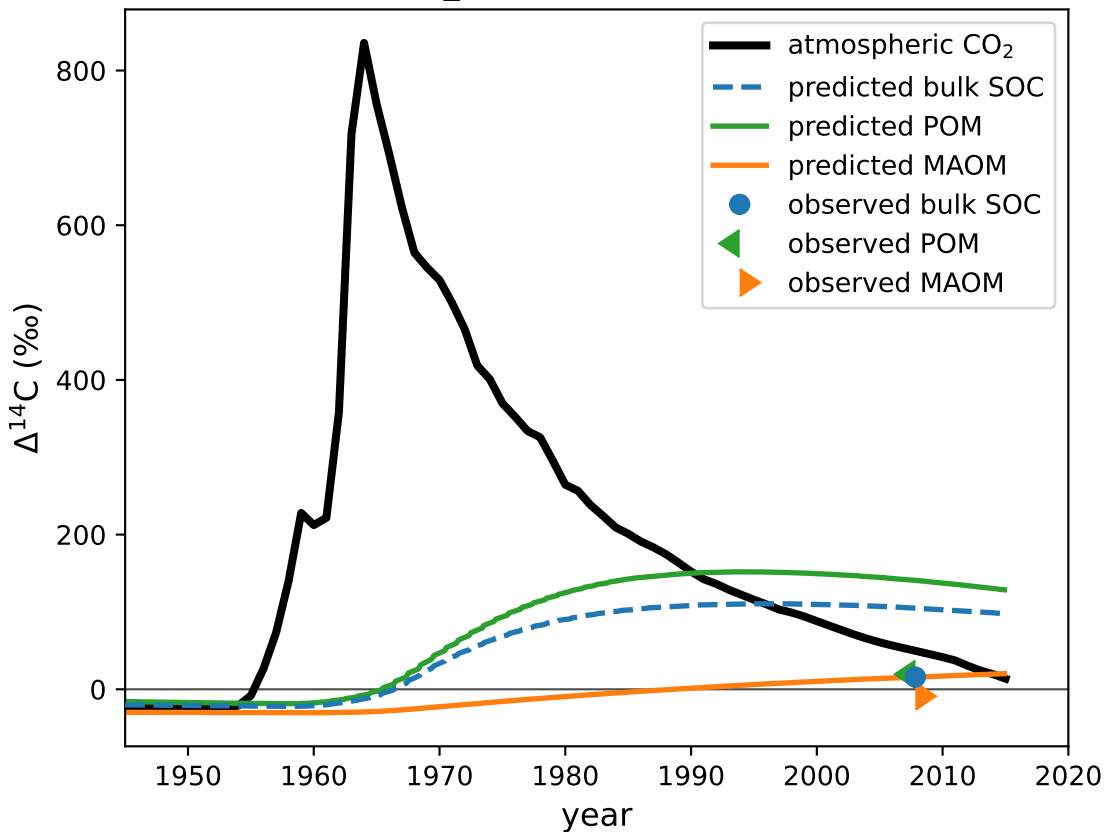

Supplement: Supplementary file 372 [file gmd-2023-242-supplement.zip]

# MIMICS

Lybrand\_2017, Catalina CZO ponderosa, ponderosa pine\_convergen

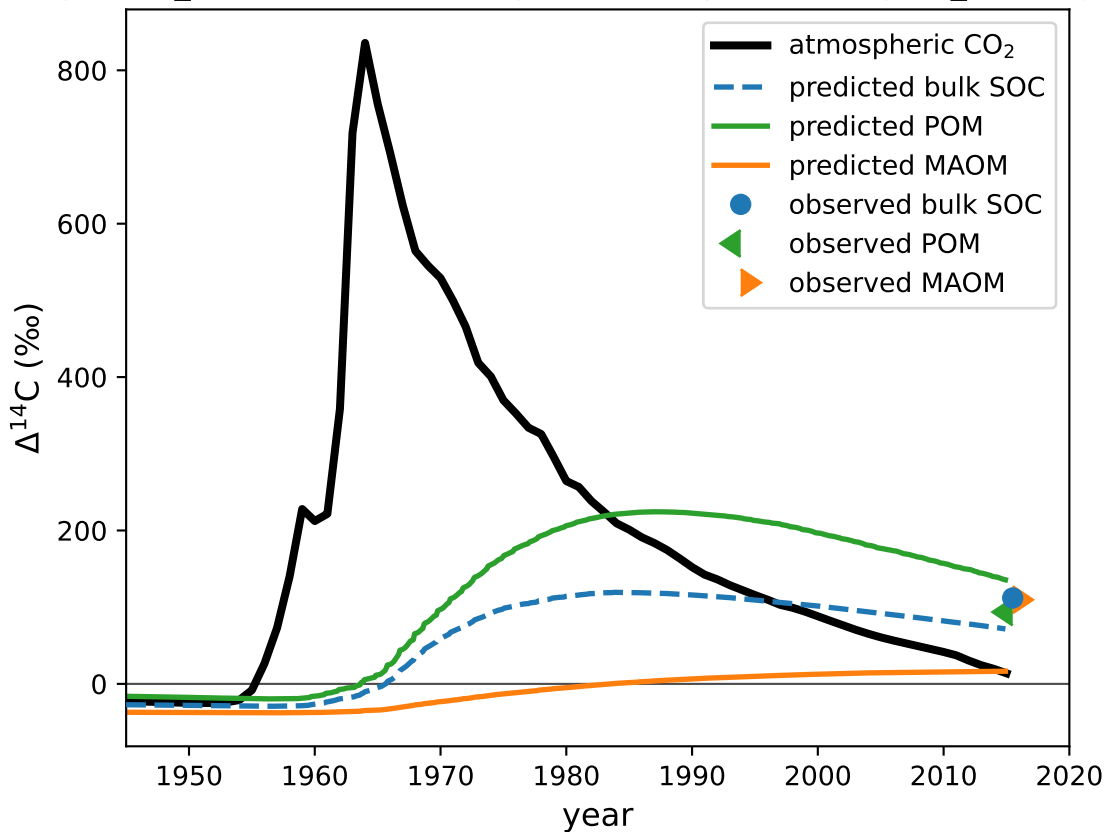

Supplement: Supplementary file 373 [file gmd-2023-242-supplement.zip]

Millennial  
McFarlane\_2013, MA Harvard Forest, H1

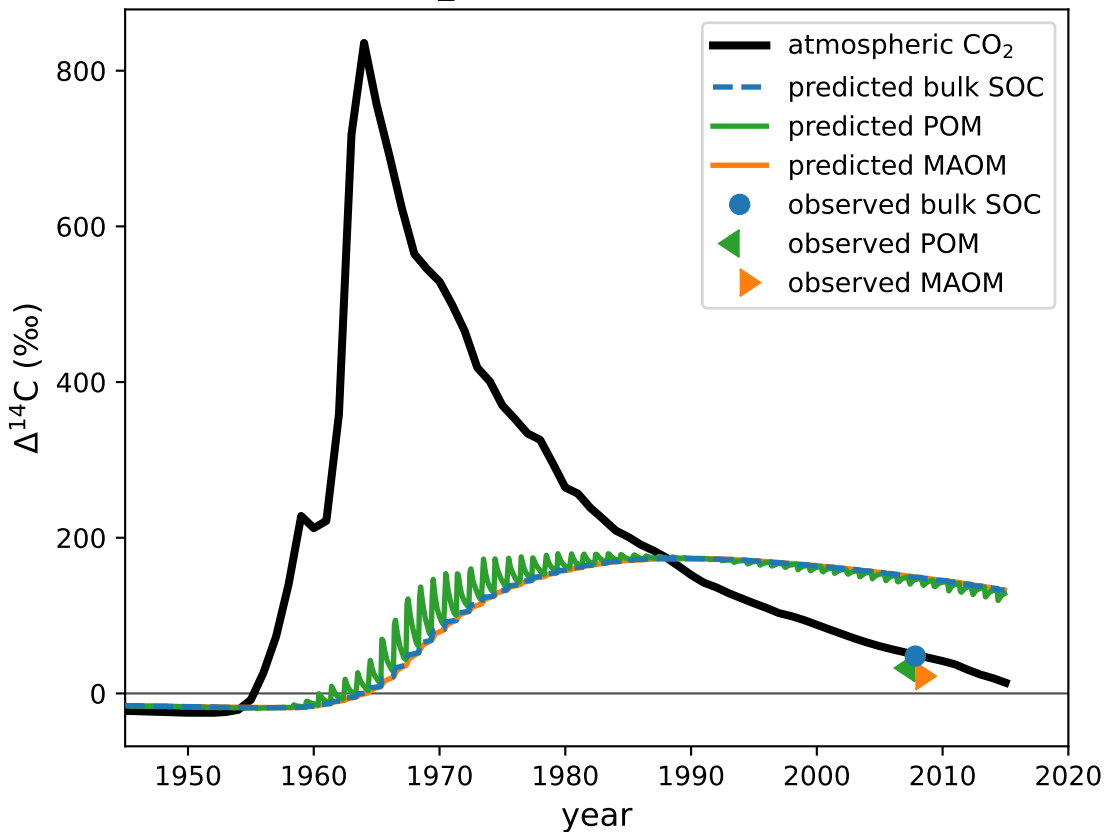

Supplement: Supplementary file 374 [file gmd-2023-242-supplement.zip]

CORPSE  
Meyer\_2012, Stubai, Abandoned

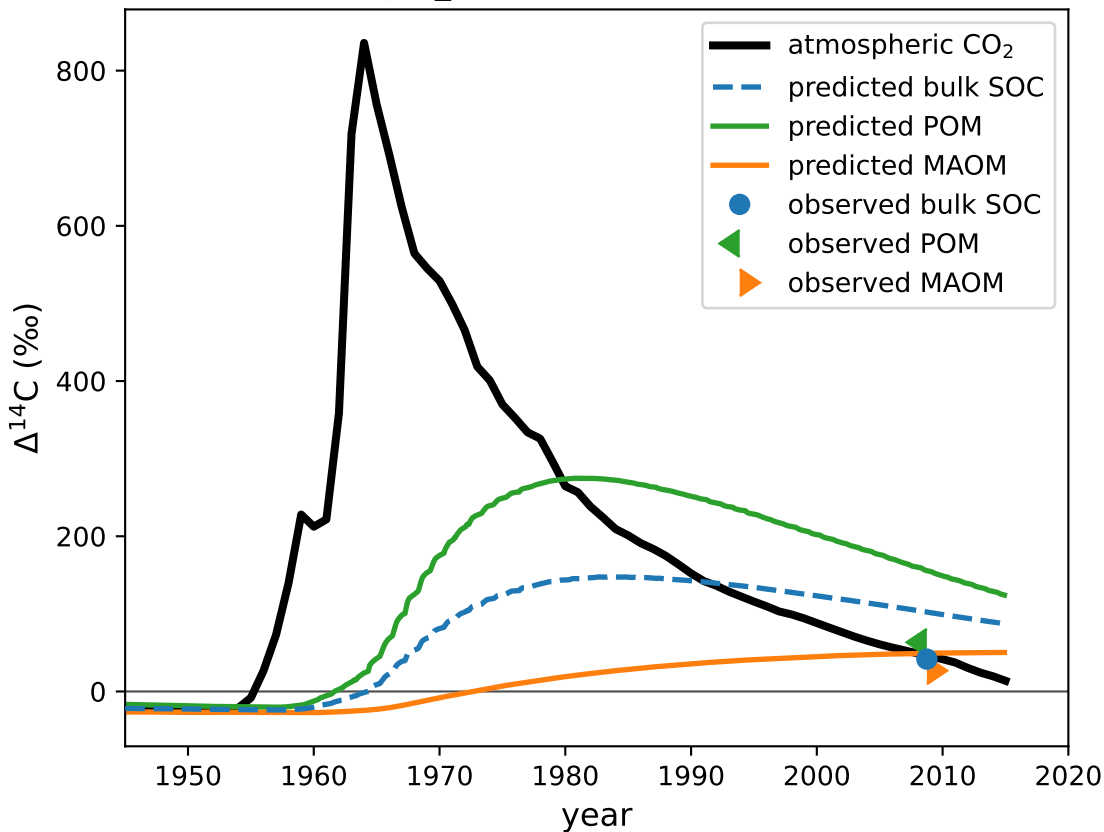

Supplement: Supplementary file 375 [file gmd-2023-242-supplement.zip]

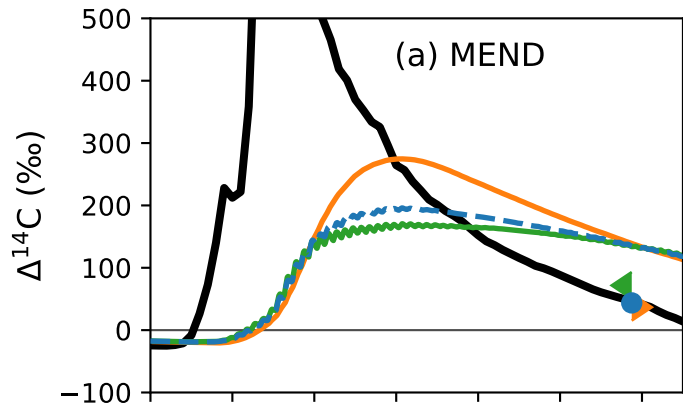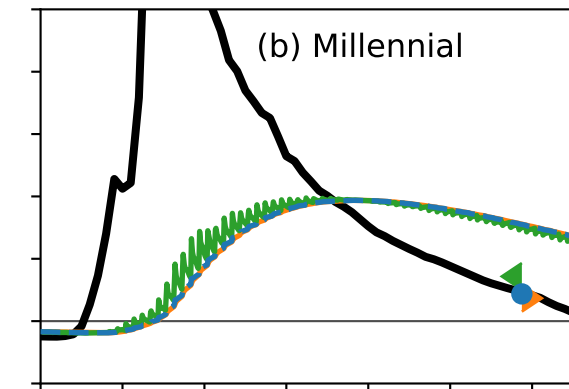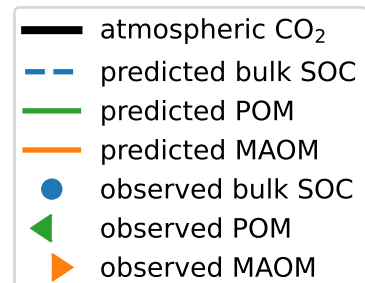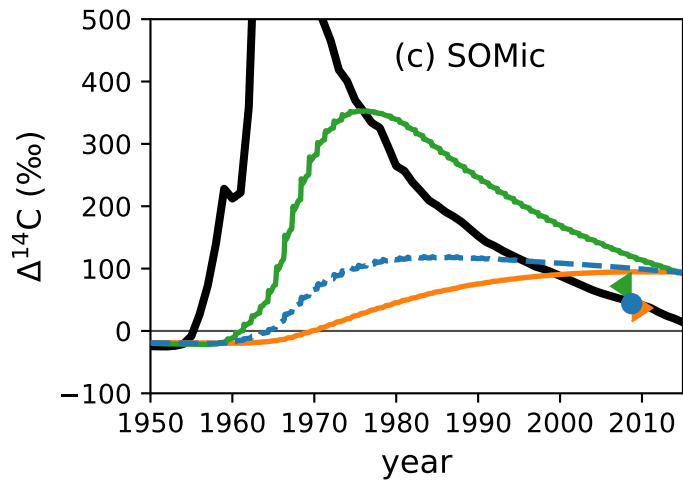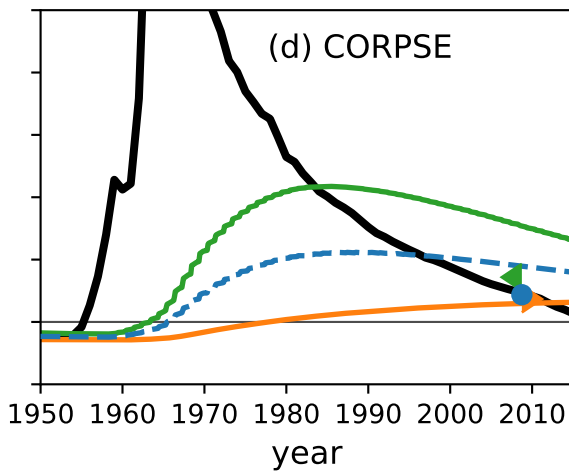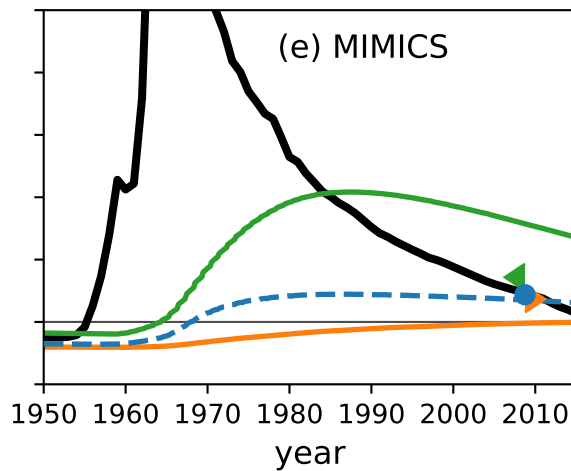

Supplement: Supplementary file 376 [file gmd-2023-242-supplement.zip]

MEND  
Schrumpf\_2013, Wetzstein, Wetzstein.1

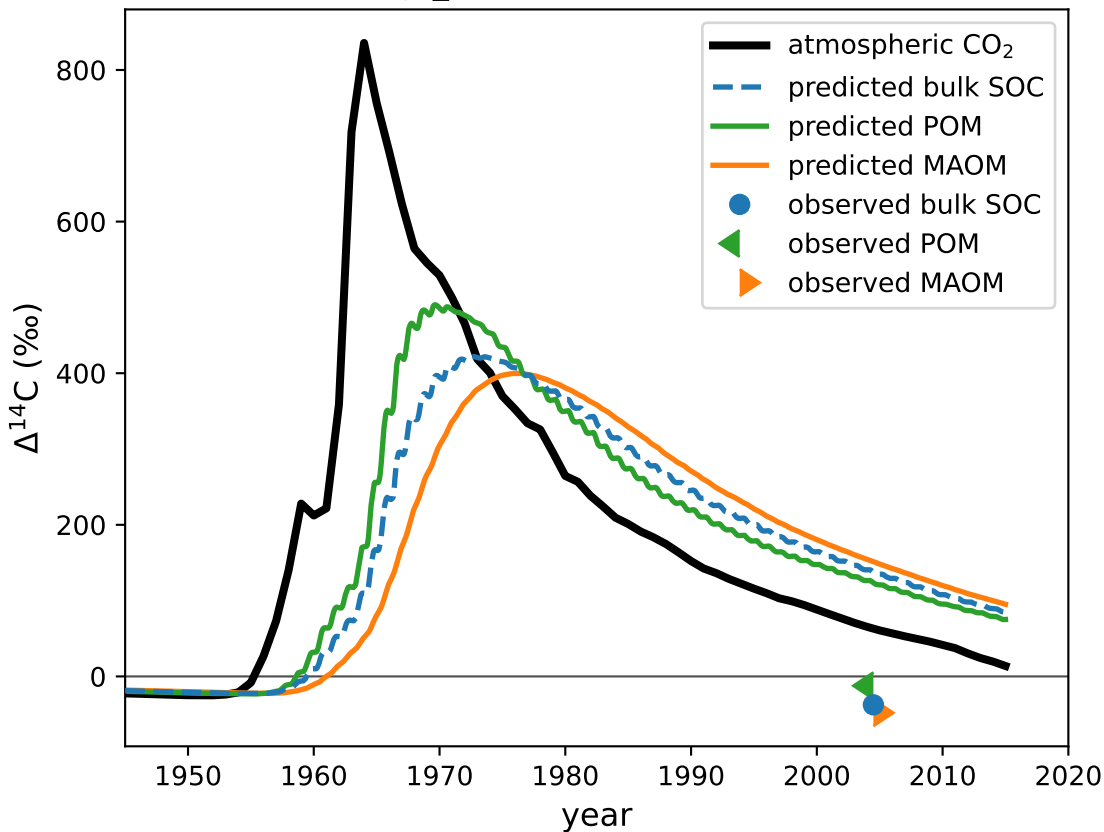

Supplement: Supplementary file 377 [file gmd-2023-242-supplement.zip]

CORPSE  
Marin-Spiotta\_2008, Sierra de Cayey, 30yr secondary forest

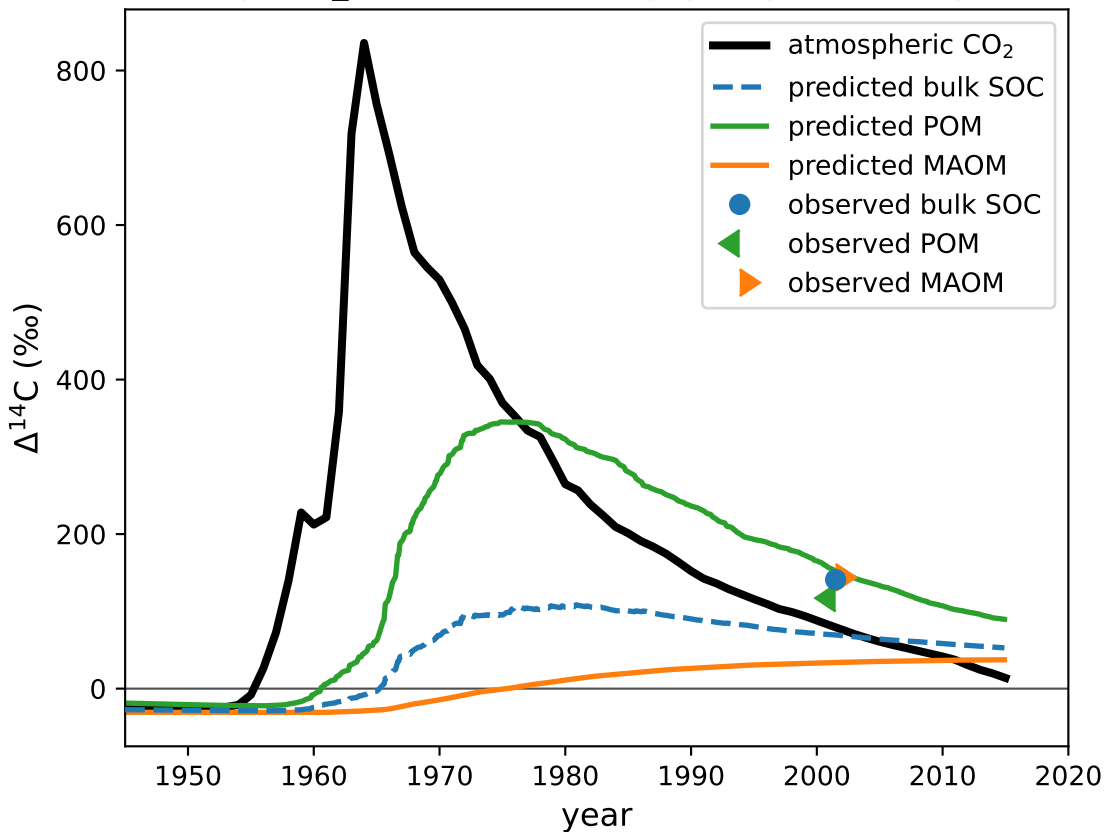

Supplement: Supplementary file 378 [file gmd-2023-242-supplement.zip]

MEND  
Heckman\_2010, Flagstaff Basalt, FGBA\_composite

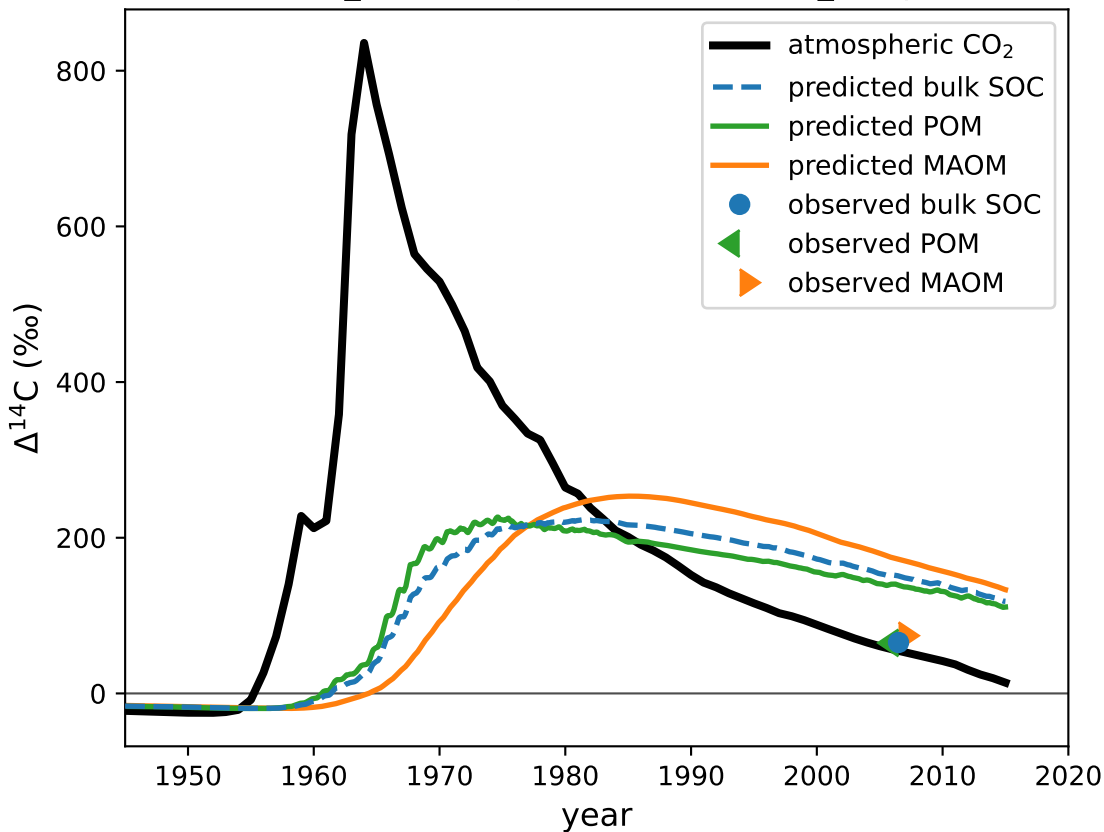

Supplement: Supplementary file 379 [file gmd-2023-242-supplement.zip]

## CORPSE

Lybrand\_2017, Catalina CZO ponderosa, ponderosa pine\_divergent

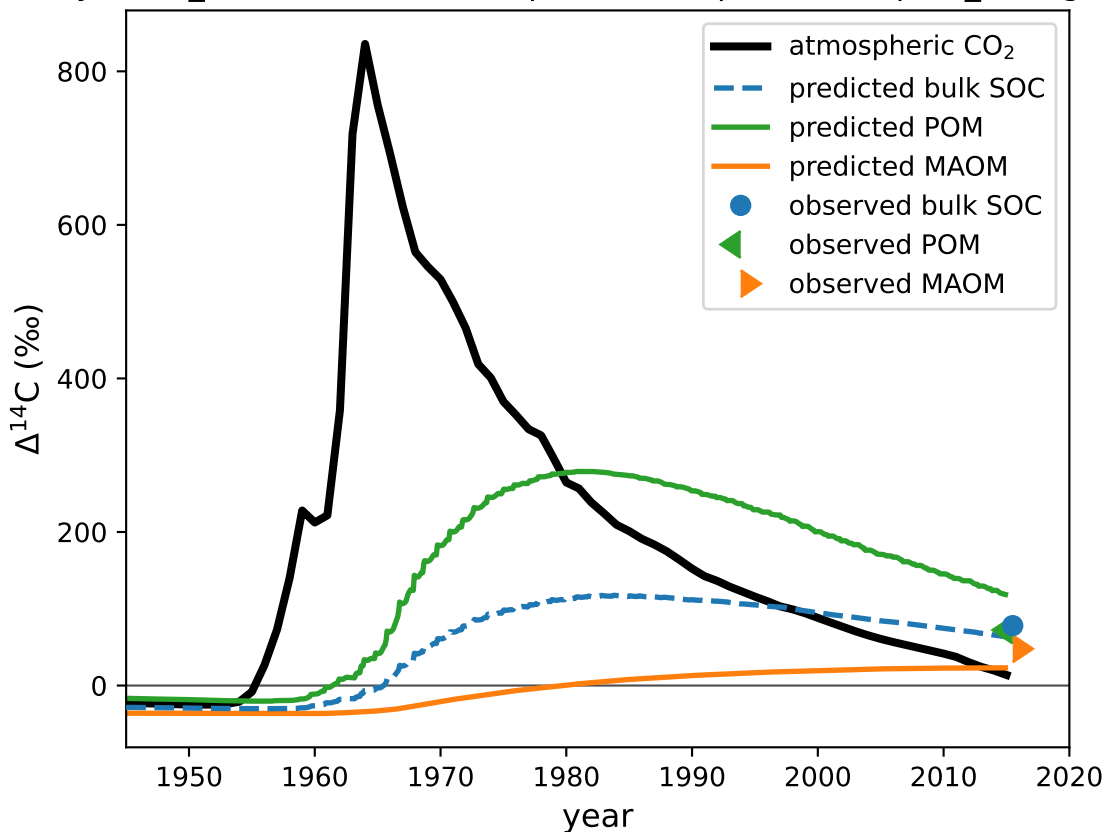

Supplement: Supplementary file 380 [file gmd-2023-242-supplement.zip]

SOMic  
McFarlane\_2013, Mi-Fine Colonial Point, C4

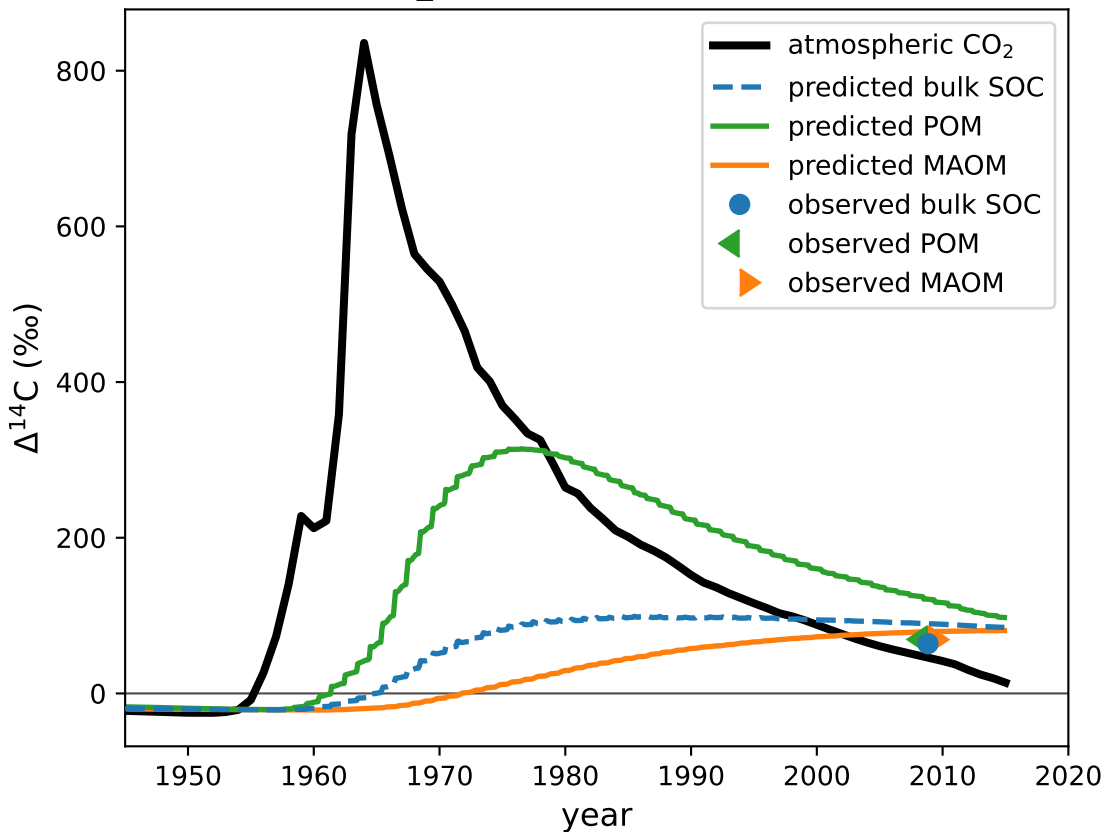

Supplement: Supplementary file 381 [file gmd-2023-242-supplement.zip]

MIMICS  
Lemke\_2006, Solling, Solling\_DO\_F3

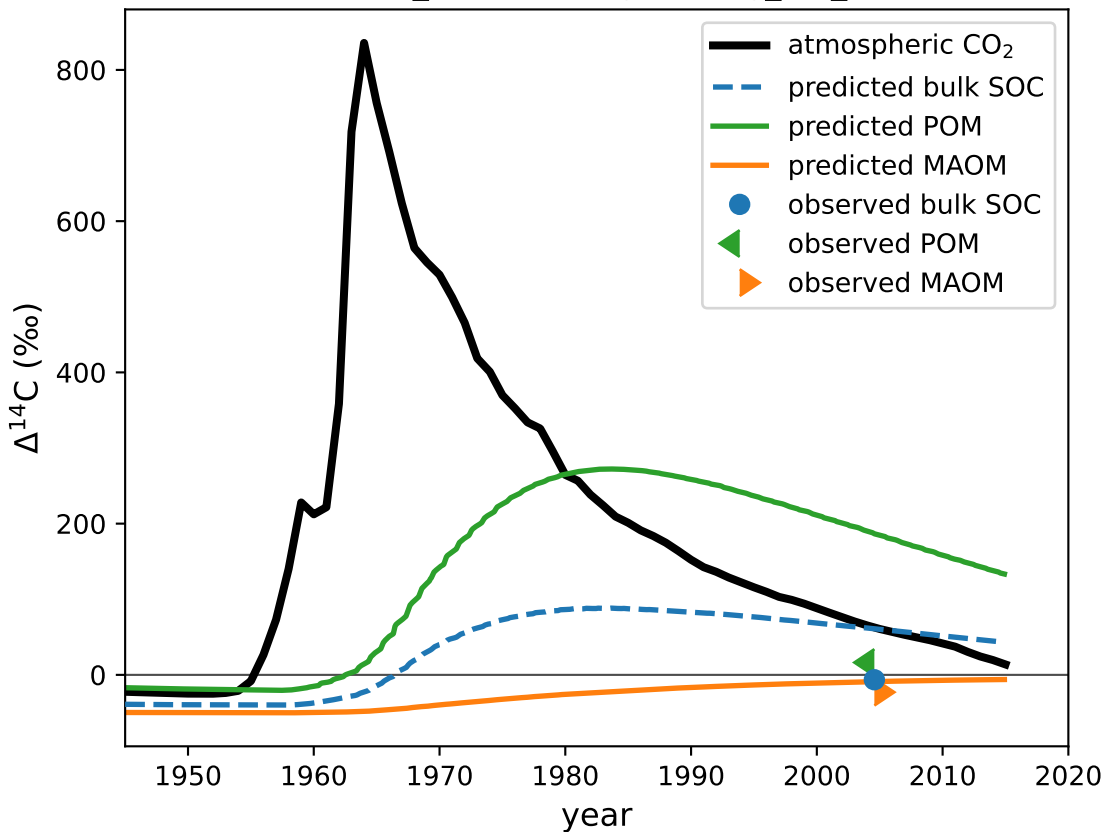

Supplement: Supplementary file 382 [file gmd-2023-242-supplement.zip]

MEND  
McFarlane\_2013, MI-Coarse UMBS, 60M

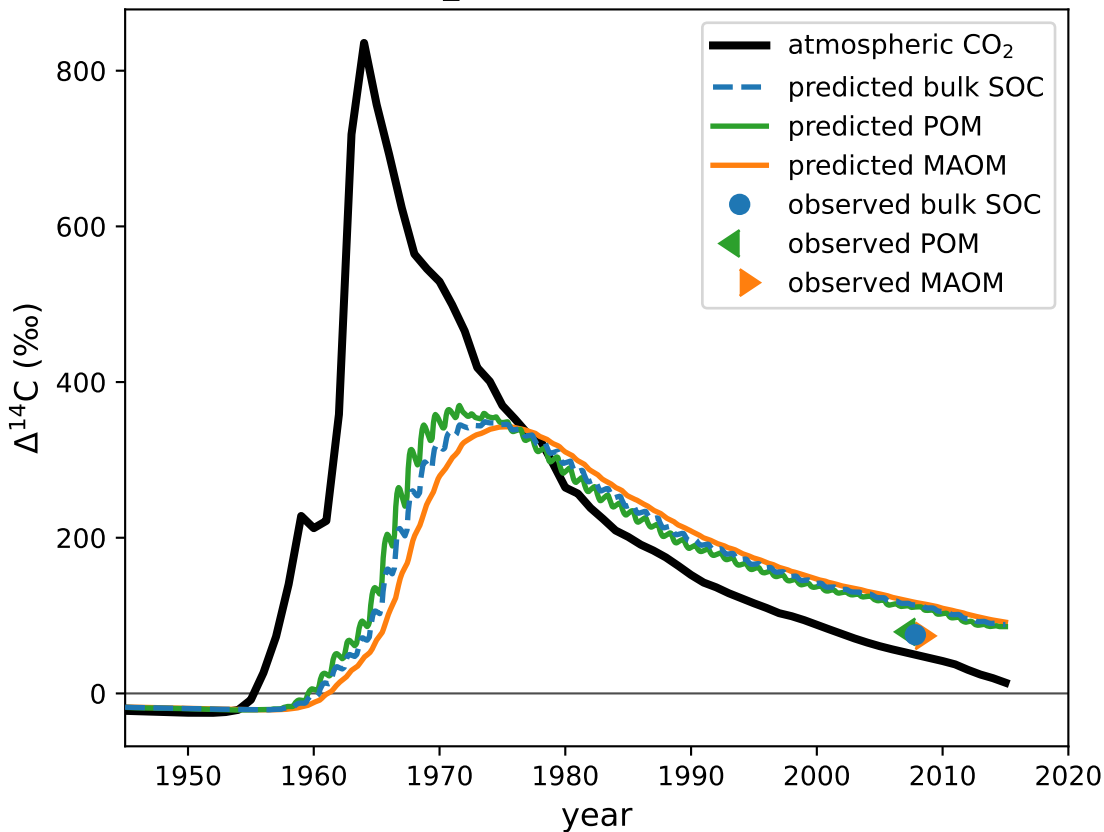

Supplement: Supplementary file 383 [file gmd-2023-242-supplement.zip]

SOMic  
McFarlane\_2013, MA Harvard Forest, H2

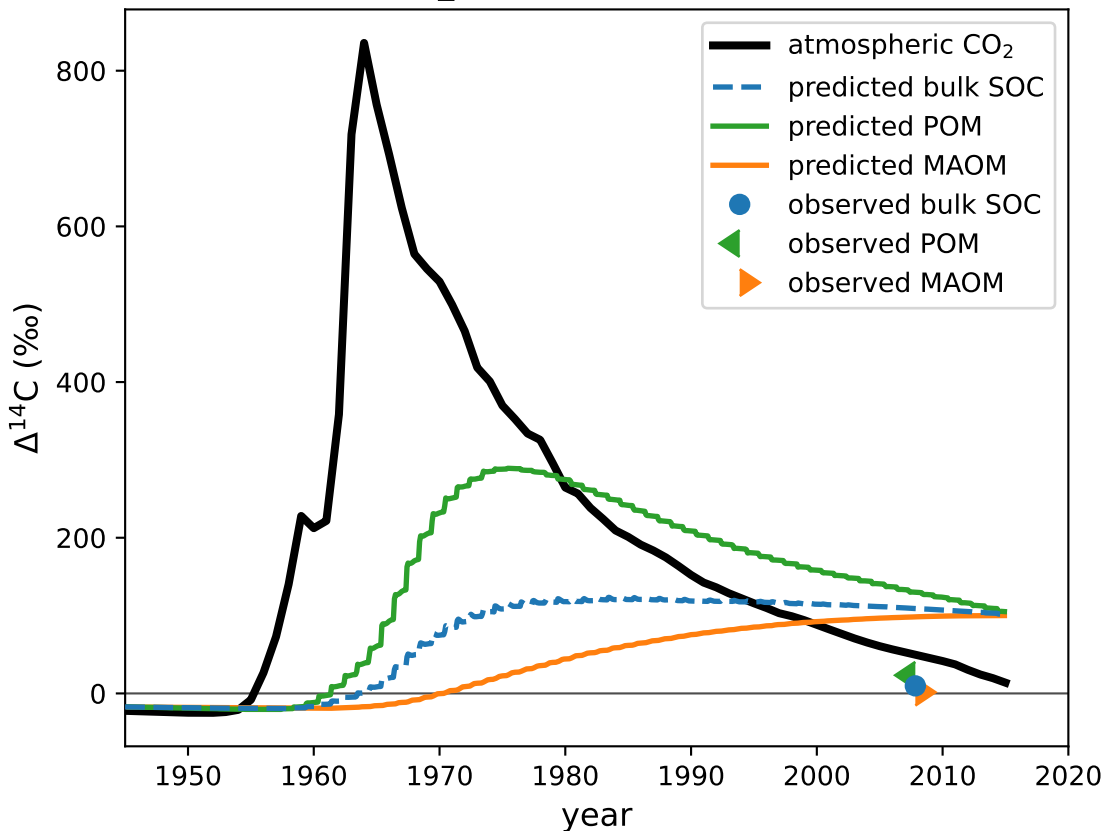

Supplement: Supplementary file 384 [file gmd-2023-242-supplement.zip]

Millennial  
McFarlane\_2013, MI-Coarse UMBS, O2

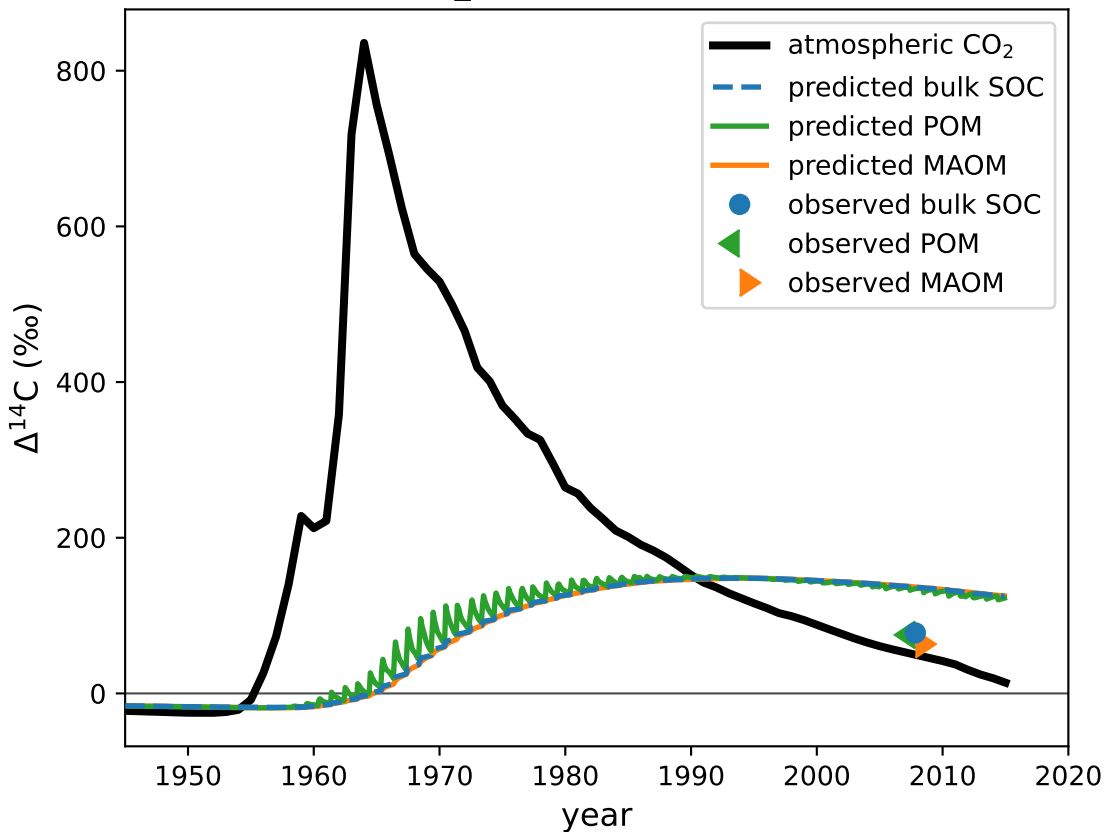

Supplement: Supplementary file 385 [file gmd-2023-242-supplement.zip]

MIMICS  
Heckman\_2010, Chiricahua Rhyolite, CHRY\_composite

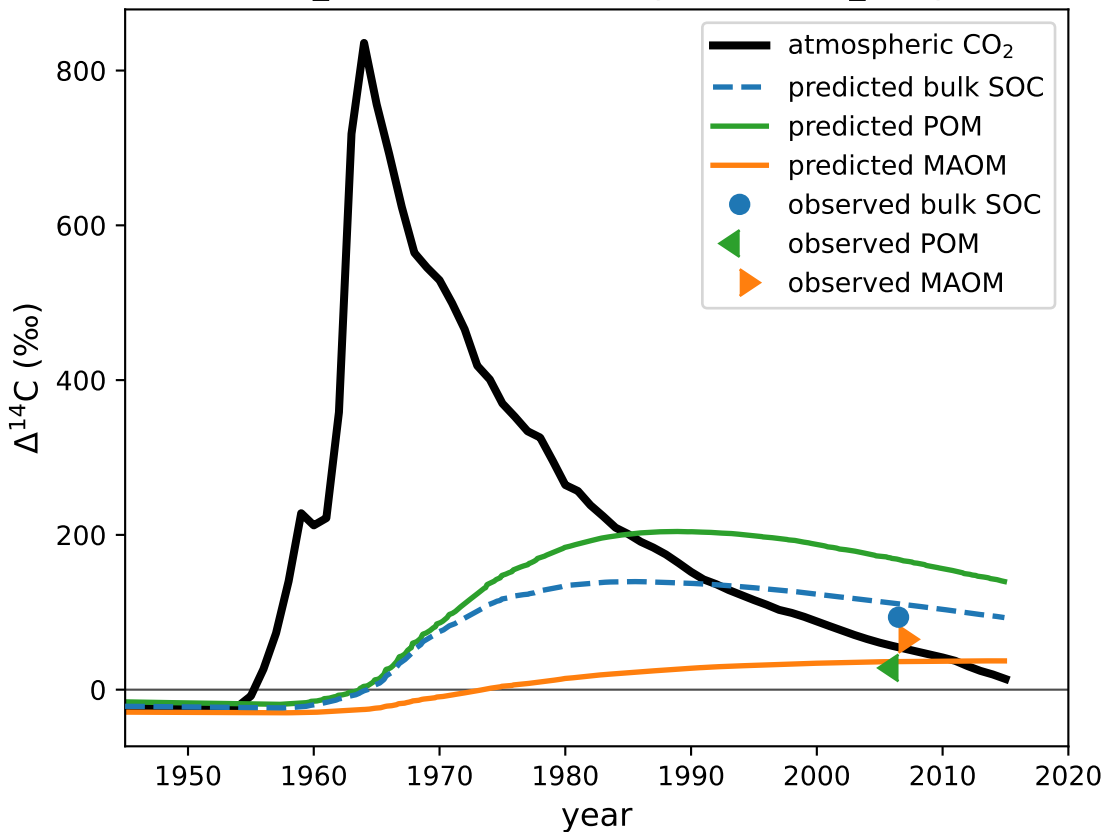

Supplement: Supplementary file 386 [file gmd-2023-242-supplement.zip]

SOMic  
Heckman\_2018, AZ\_Mollisol, Basalt

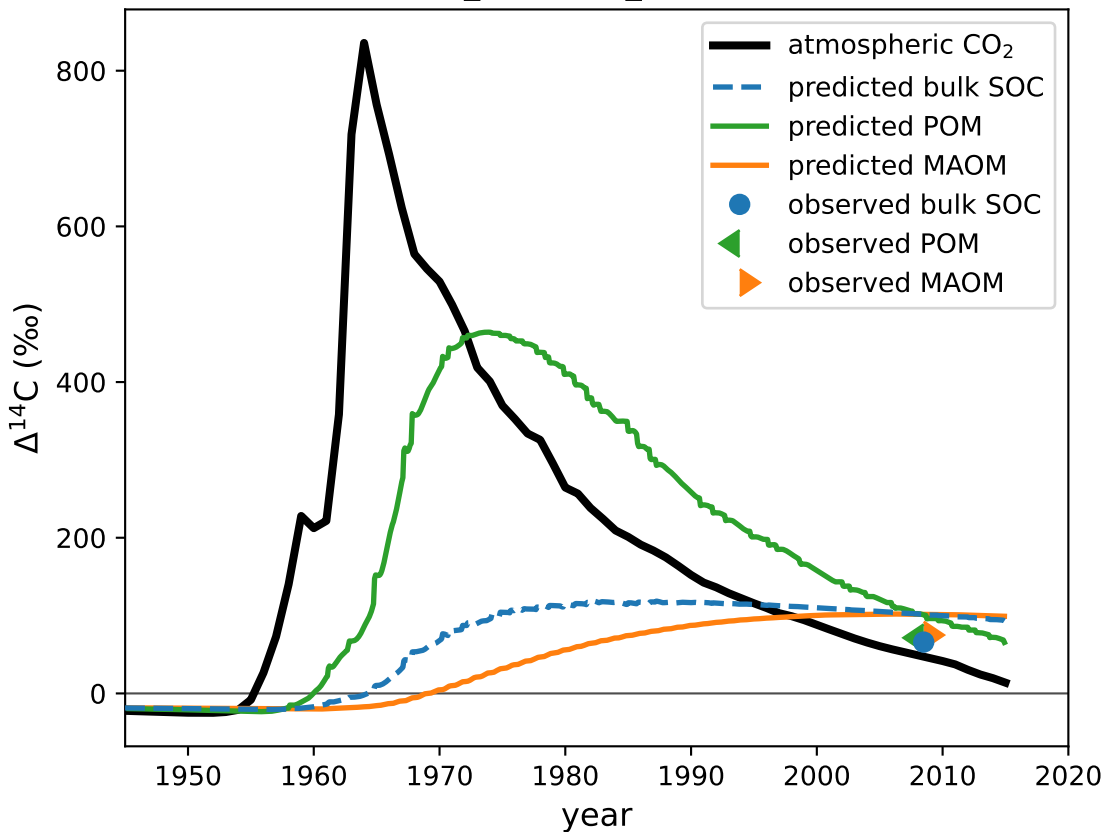

Supplement: Supplementary file 387 [file gmd-2023-242-supplement.zip]

Millennial  
Rasmussen\_2018, BSpp, BSpp

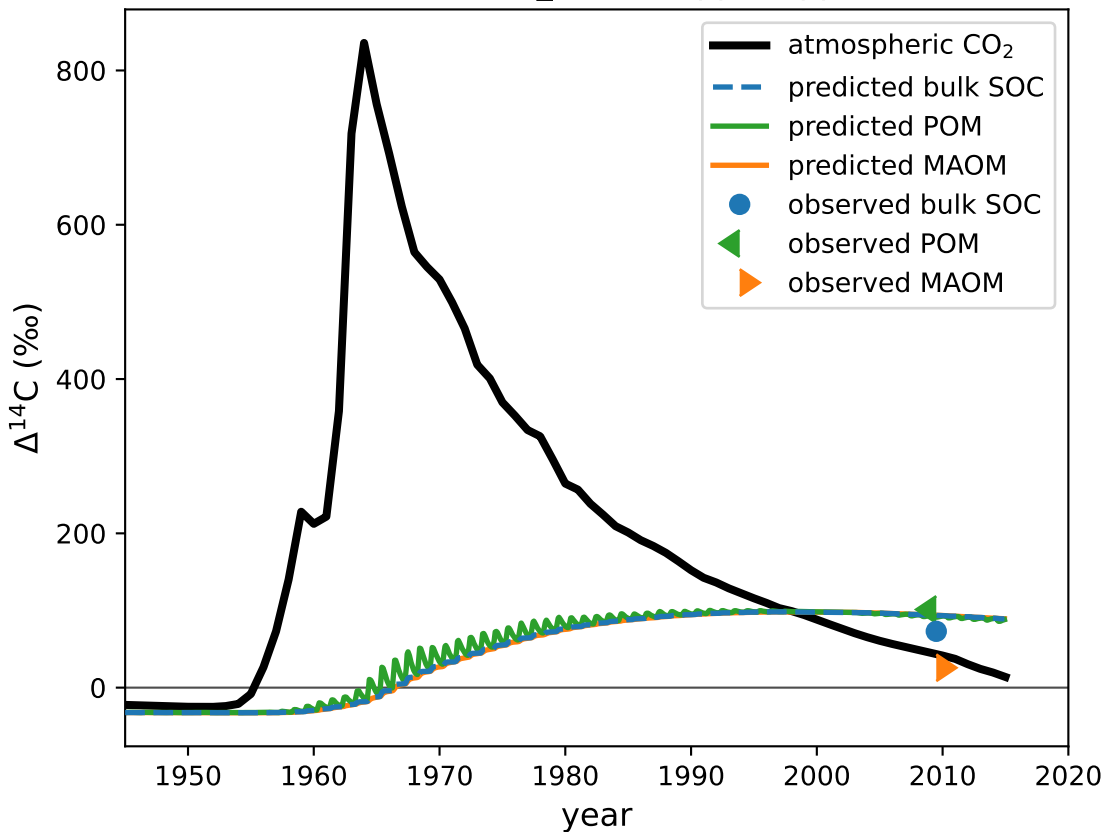

Supplement: Supplementary file 388 [file gmd-2023-242-supplement.zip]

CORPSE  
Rasmussen\_2018, BSwf, BSwf

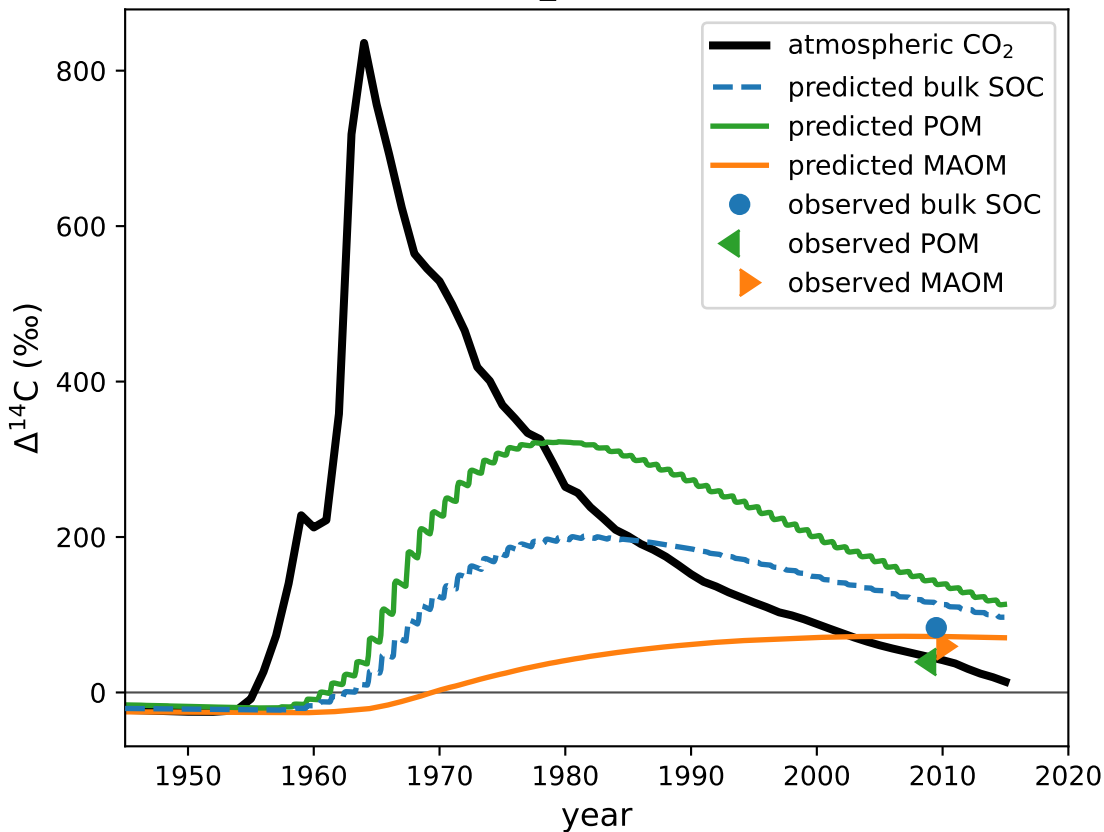

Supplement: Supplementary file 389 [file gmd-2023-242-supplement.zip]

CORPSE  
McFarlane\_2013, MO Ozark BREA, M5

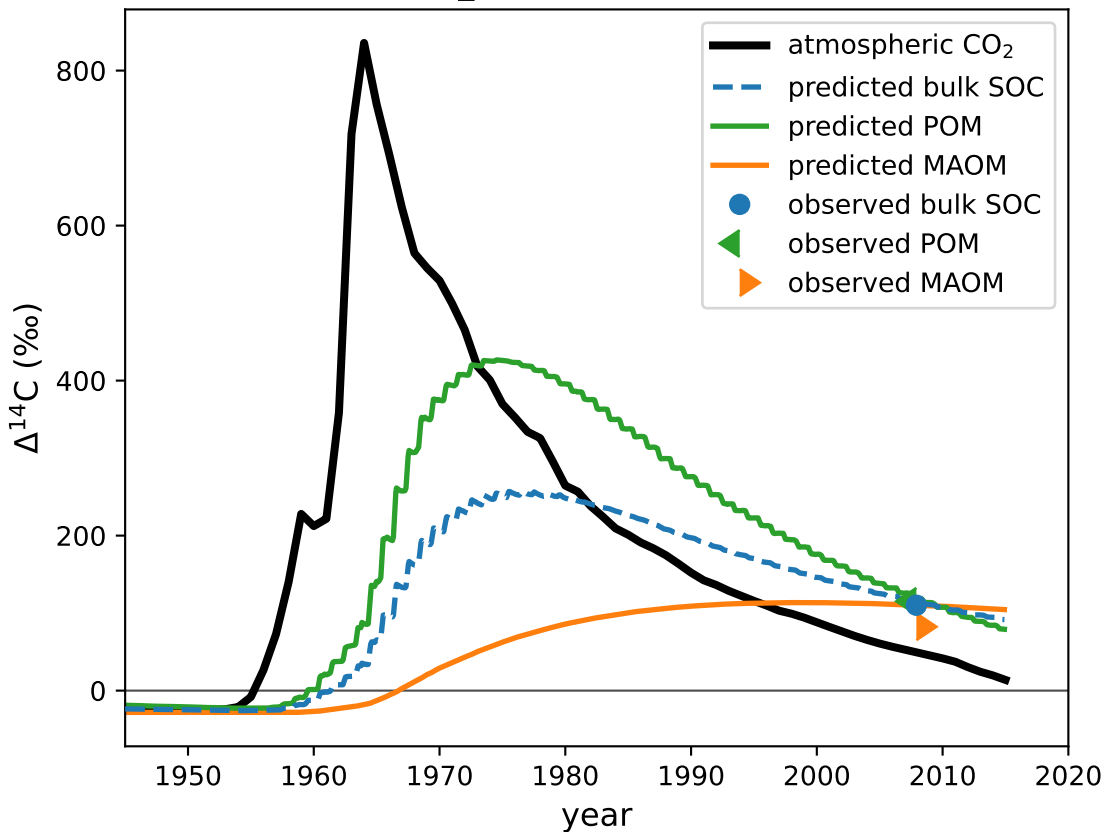

Supplement: Supplementary file 390 [file gmd-2023-242-supplement.zip]

CORPSE  
McFarlane\_2013, Mi-Fine Colonial Point, C4

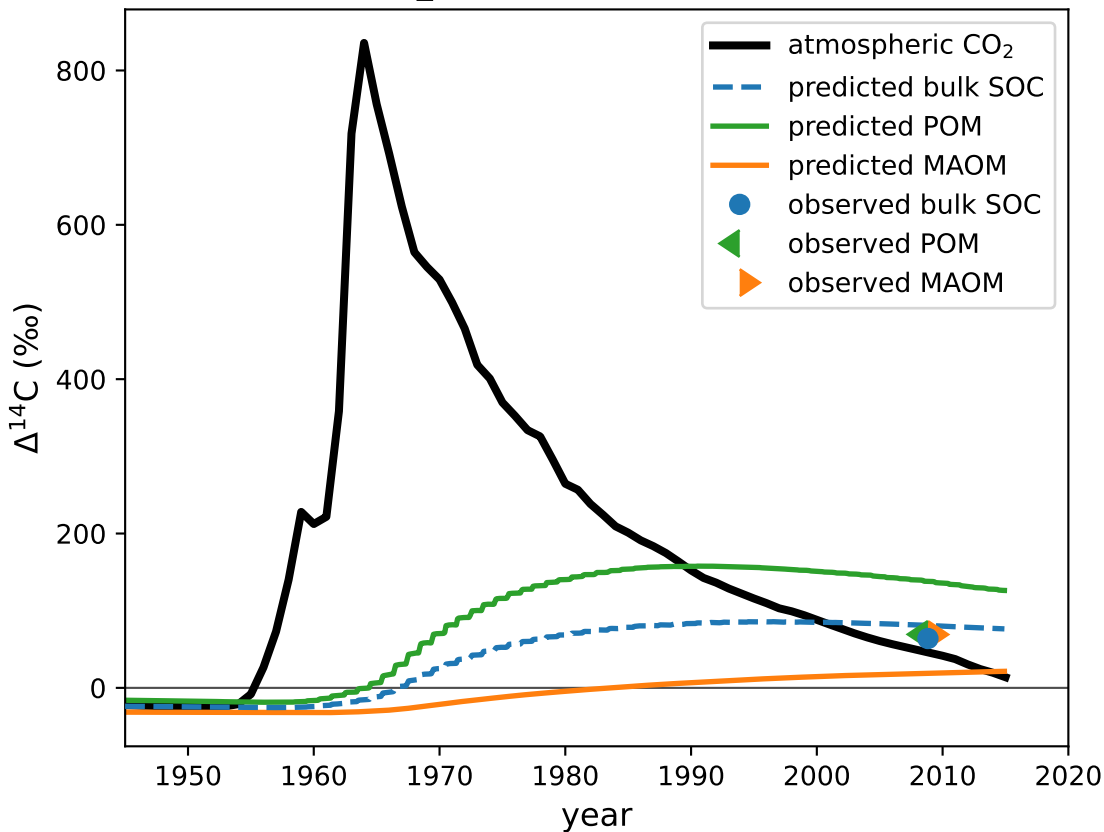

Supplement: Supplementary file 391 [file gmd-2023-242-supplement.zip]

SOMic  
Baisden\_2002, Riverbank, Riverbank.1997

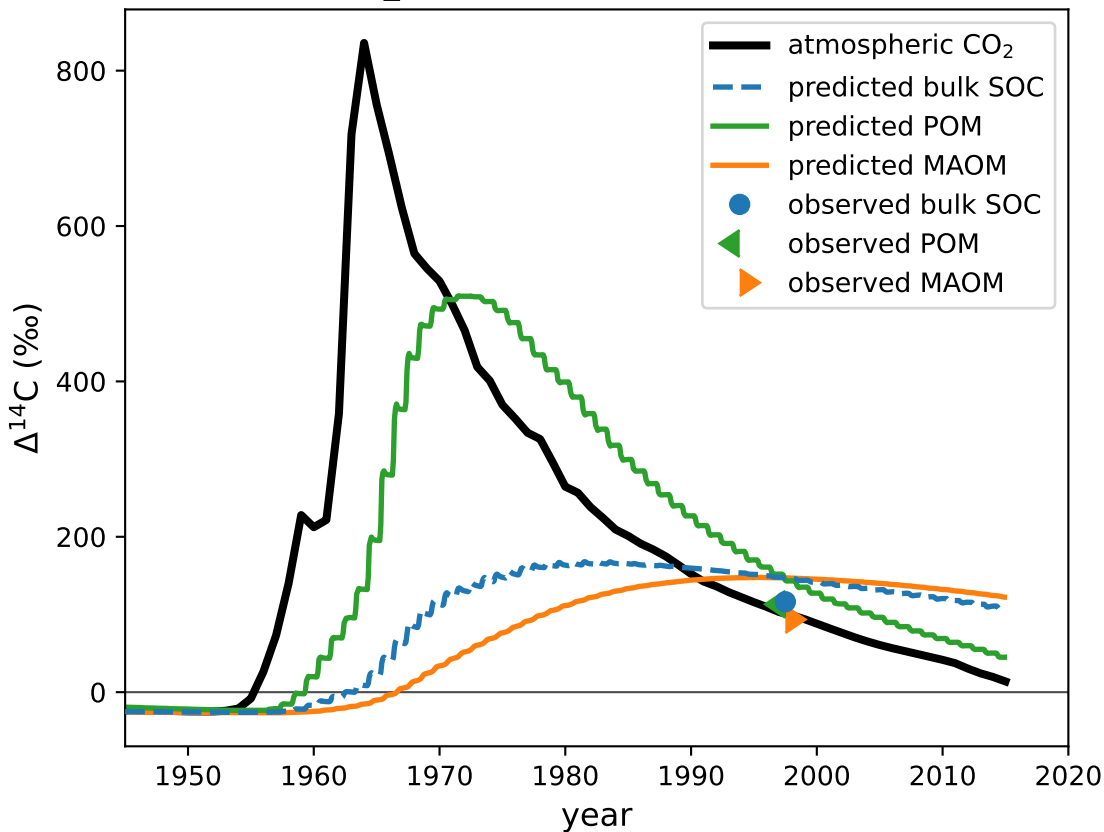

Supplement: Supplementary file 392 [file gmd-2023-242-supplement.zip]

MIMICS  
Heckman\_2018, AZ\_Mollisol, Basalt

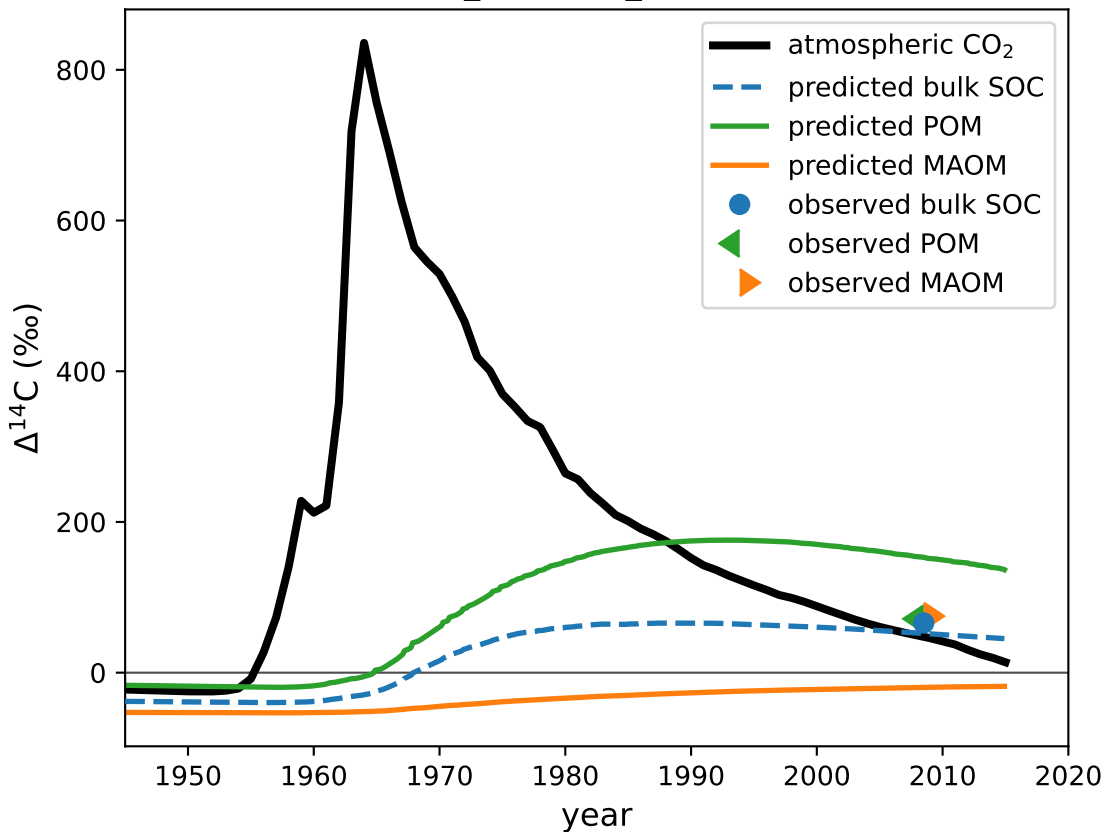

Supplement: Supplementary file 393 [file gmd-2023-242-supplement.zip]

## MEND

Lybrand\_2017, Catalina CZO desert, desert scrub\_convergent

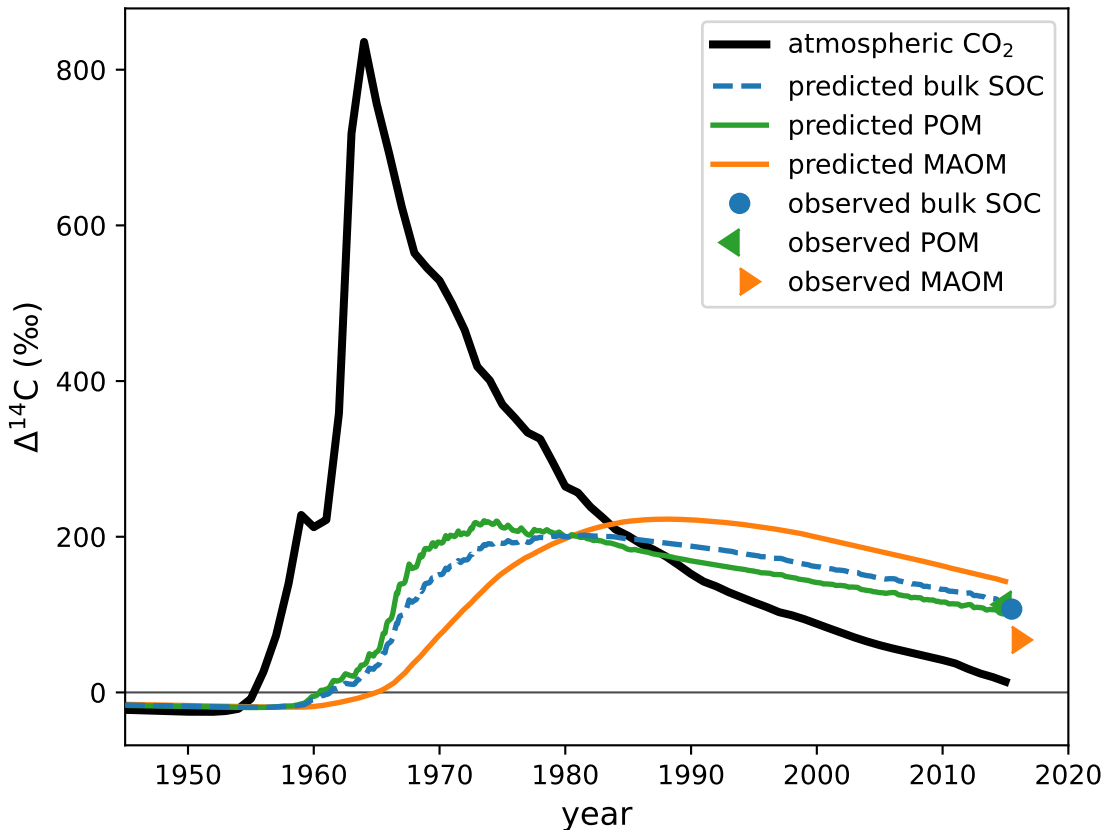

Supplement: Supplementary file 394 [file gmd-2023-242-supplement.zip]
